# Supplementary material for: The Framework for 0-D Atmospheric Modeling (F0AM) v3.1
Source: Copernicus journal article supplement (doi:10.5194/gmd-2016-175), 2016-07-08

**Final Report**

**UPDATES TO THE CARBON BOND  
CHEMICAL MECHANISM: CB05**

RT-04-00675

Prepared for

Deborah Luecken  
U.S. Environmental Protection Agency  
Research Triangle Park, NC 27703

Prepared by

Greg Yarwood and Sunja Rao  
ENVIRON International Corporation  
101 Rowland Way, Suite 220  
Novato, CA 94945

Mark Yocke  
Yocke & Company  
101 Rowland Way  
Novato, CA 94945

Gary Z. Whitten  
Smog Reyes  
112 Mesa  
Point Reyes Station, CA 94956

December 8, 2005

## **ACKNOWLEDGEMENT**

The authors gratefully acknowledge contributions from several collaborators in this work. Dr. William Carter of U.C. Riverside (UCR) simulated smog chamber experiments performed at UCR. Mr. Ken Sexton of the University of North Carolina (UNC) provided assistance in simulating smog chamber experiments performed at UNC. Dr. Deborah Luecken and Dr. Golam Sarwar of U.S. EPA provided advice and review of the data, assumptions and interpretation of results for this study.

## ABSTRACT

Updated versions of the Carbon Bond mechanism were developed for use in EPA atmospheric modeling studies. The new Carbon Bond mechanism is called CB05 because it was developed in 2005. The CB05 is a condensed mechanism of atmospheric oxidant chemistry that provides a basis for computer modeling studies of ozone, particulate matter (PM), visibility, acid deposition and air toxics issues. Updates in CB05 compared to earlier CB4 mechanisms are:

- Updated rate constants based on recent (2003 – 2005) IUPAC and NASA evaluations.
- An extended inorganic reaction set for urban to remote tropospheric conditions.
- NO<sub>x</sub> recycling reactions to represent the fate of NO<sub>x</sub> over multiple days.
- Explicit organic chemistry for methane and ethane.
- Explicit methylperoxy radical, methyl hydroperoxide and formic acid.
- Lumped higher organic peroxides, organic acids and peracids.
- Internal olefin (R-HC=CH-R) species called IOLE.
- Higher aldehyde species ALDX making ALD2 explicitly acetaldehyde.
- Higher peroxyacyl nitrate species from ALDX called PANX.
- Lumped terpene species called TERP.
- Optional mechanism extension for reactive chlorine chemistry.
- Optional extended mechanism with explicit reactions for air-toxics.

The core CB05 mechanism has 51 species and 156 reactions. The CB05 was evaluated against smog chamber data from the Universities of North Carolina and California at Riverside. An updated wall reaction mechanism was developed for the UNC chamber that improved performance in experiments that are sensitive to chamber radical sources. The addition of higher aldehyde (ALDX) and internal olefin (IOLE) species to CB05 improve mechanism performance for simulating these species groups. The addition of organic peroxide species improves the simulation of oxidants that are involved in PM sulfate formation. The addition of explicit methylperoxy radical improves the simulation of hydrogen peroxide under low NO<sub>x</sub> conditions.

Two CB05 mechanism extensions were developed. The reactive chlorine chemistry mechanism can be used in conjunction with the CB05 core mechanism to model the impact of CL<sub>2</sub> and/or HOCl emissions on oxidant formation and VOC decay rates. The explicit species extension can be used in conjunction with the CB05 (or another) core mechanism to model the following toxic species: primary formaldehyde, primary acetaldehyde, 1,3-butadiene, primary and secondary acrolein. Other explicit species are toluene, o-xylene, m-xylene, p-xylene, alpha-pinene and beta-pinene. These include the main precursors to secondary organic aerosol (SOA) and could be used as the basis for refined modeling approach for SOA that is independent of the core mechanism selected (e.g., CB4, CB05 or SAPRC99).

## TABLE OF CONTENTS

|                                                    | Page       |
|----------------------------------------------------|------------|
| <b>1. INTRODUCTION.....</b>                        | <b>1-1</b> |
| History of CB4.....                                | 1-1        |
| <b>2. MECHANISM UPDATES .....</b>                  | <b>2-1</b> |
| CB05 Core Mechanism.....                           | 2-1        |
| Extended Mechanism with Explicit Species.....      | 2-10       |
| Reactive Chlorine Chemistry.....                   | 2-13       |
| Chemical Species Mapping for CB05 Mechanisms ..... | 2-15       |
| <b>3. CB05 IMPLEMENTATION TESTING .....</b>        | <b>3-1</b> |
| Comparing CB05 to CB4.....                         | 3-1        |
| Rate Constant Comparisons.....                     | 3-5        |
| Box Model Comparisons .....                        | 3-9        |
| <b>4. MECHANISM EVALUATION.....</b>                | <b>4-1</b> |
| UNC Chamber .....                                  | 4-1        |
| UCR Chamber.....                                   | 4-9        |
| <b>5. SUMMARY AND RECOMMENDATIONS.....</b>         | <b>5-1</b> |
| <b>REFERENCES.....</b>                             | <b>R-1</b> |

## APPENDICES

- Appendix A: Assignments from VOC Species to CB05 Model Species  
Appendix B: Chamber Simulations for the University of North Carolina (UNC)  
                Chamber with CB05 Organized by Chemical Compound Type

## TABLES

|            |                                                                                                                                                                       |      |
|------------|-----------------------------------------------------------------------------------------------------------------------------------------------------------------------|------|
| Table 2-1. | Species names for the CB05 core mechanism .....                                                                                                                       | 2-1  |
| Table 2-2. | Reactions in the CB05 core mechanism .....                                                                                                                            | 2-2  |
| Table 2-3. | Reactions in the extended CB05 mechanism that<br>may be added to the core mechanism. ....                                                                             | 2-10 |
| Table 2-4. | Reactions in the CB05 reactive chlorine mechanism<br>that may be added to the CB05 core mechanism .....                                                               | 2-13 |
| Table 2-5. | Species added to CB05 by the reactive chlorine mechanism .....                                                                                                        | 2-14 |
| Table 3-1. | VOC composition used for the box model comparison of CB4 and CB05 .....                                                                                               | 3-1  |
| Table 3-2. | Comparison of CB05 thermal rate constants calculated<br>by SmogReyes and EPA for three different<br>temperature/pressure conditions (units are ppm and minutes) ..... | 3-6  |
| Table 4-1. | Wall reactions from the Jeffries, Voicu and Sexton (2002)<br>UNC chamber mechanisms that were changed for this project .....                                          | 4-2  |
| Table 4-2. | New wall reactions for the UNC chamber used in this project .....                                                                                                     | 4-2  |
| Table 4-3. | Compounds and numbers of UCR experiments included in<br>the comparison between CB05 and SAPRC99 mechanism performance .....                                           | 4-12 |
| Table 4-4. | Numbered UCR chamber experiments used to evaluate<br>the CB05 and SAPRC99 mechanisms, by compound .....                                                               | 4-13 |

## FIGURES

|              |                                                                                                                                          |      |
|--------------|------------------------------------------------------------------------------------------------------------------------------------------|------|
| Figure 3-1.  | Comparison of CB4 and CB05 ozone predictions for<br>urban MIR conditions. ....                                                           | 3-2  |
| Figure 3-2.  | Comparison of CB4 and CB05 HNO <sub>3</sub> predictions for<br>urban MIR conditions .....                                                | 3-3  |
| Figure 3-3.  | Comparison of CB4 and CB05 H <sub>2</sub> O <sub>2</sub> predictions for<br>urban MIR conditions. ....                                   | 3-3  |
| Figure 3-4.  | Comparison of CB4 and CB05 ozone predictions for<br>urban MOIR conditions .....                                                          | 3-4  |
| Figure 3-5.  | Comparison of CB4 and CB05 HNO <sub>3</sub> predictions for<br>urban MOIR conditions .....                                               | 3-4  |
| Figure 3-6.  | Comparison of CB4 and CB05 H <sub>2</sub> O <sub>2</sub> predictions for<br>urban MOIR conditions .....                                  | 3-5  |
| Figure 3-7.  | Comparison of results from the CMAQ and OZIPM box<br>models for NO, NO <sub>2</sub> and O <sub>3</sub> at 298 K and 1 atmosphere .....   | 3-10 |
| Figure 3-8.  | Comparison of results from the CMAQ and OZIPM box<br>models for HONO and HO <sub>2</sub> at 298 K and 1 atmosphere .....                 | 3-10 |
| Figure 3-9.  | Comparison of results from the CMAQ and OZIPM box<br>models for NO, NO <sub>2</sub> and O <sub>3</sub> at 298 K and 0.5 atmosphere ..... | 3-11 |
| Figure 3-10. | Comparison of results from the CMAQ and OZIPM box<br>models for NO, NO <sub>2</sub> and O <sub>3</sub> at 310K and 1 atmosphere .....    | 3-11 |
| Figure 4-1.  | Comparison of CB05 (top) and CB4-2002 (bottom)<br>simulations of UNC carbon monoxide experiment August 30, 1993 (red) .....              | 4-3  |
| Figure 4-2.  | Comparison of CB05 (top) and CB4-2002 (bottom)<br>simulations of UNC carbon monoxide experiment August 30, 1996 (blue) .....             | 4-4  |

|              |                                                                                                                                                                                                                           |      |
|--------------|---------------------------------------------------------------------------------------------------------------------------------------------------------------------------------------------------------------------------|------|
| Figure 4-3.  | Comparison of CB05 (top) and CB4-2002 (bottom) simulations of UNC experiment of September 4, 1997 (red chamber) with trimethylacetaldehyde and Propionaldehyde .....                                                      | 4-5  |
| Figure 4-4.  | Comparison of CB05 (top) and CB4-2002 (bottom) simulations of UNC experiment October 16, 1996 (blue chamber) with propene, 1-butene and 1-pentene .....                                                                   | 4-6  |
| Figure 4-5.  | Comparison of CB05 (top) and CB4-2002 (bottom) simulations of UNC experiment September 14, 1996 (blue chamber) with an equimolar mixture of all butene isomers (1-butene, cis-2-butene, trans-2-butene, isobutene). ..... | 4-7  |
| Figure 4-6.  | SAPRC99 (left) and CB05 (right) simulation of a carbon monoxide experiment in the EPA chamber at UCR .....                                                                                                                | 4-14 |
| Figure 4-7.  | SAPRC99 simulation of four formaldehyde experiments in the EPA chamber at UCR .....                                                                                                                                       | 4-15 |
| Figure 4-8.  | CB05 simulation of four formaldehyde experiments in the EPA chamber at UCR .....                                                                                                                                          | 4-16 |
| Figure 4-9.  | SAPRC99 (left) and CB05 (right) simulation of an ethene experiment in the EPA chamber at UCR.....                                                                                                                         | 4-17 |
| Figure 4-10. | SAPRC99 (left) and CB05 (right) simulation of a propene experiment in the EPA chamber at UCR .....                                                                                                                        | 4-17 |
| Figure 4-11. | SAPRC99 (left) and CB05 (right) simulation of a butane experiment in the EPA chamber at UCR .....                                                                                                                         | 4-18 |
| Figure 4-12. | SAPRC99 simulation of two toluene experiments in the EPA chamber at UCR .....                                                                                                                                             | 4-19 |
| Figure 4-13. | CB05 simulation of two toluene experiments in the EPA chamber at UCR .....                                                                                                                                                | 4-20 |
| Figure 4-14. | SAPRC99 simulation of two xylene experiments in the EPA chamber at UCR. ....                                                                                                                                              | 4-21 |
| Figure 4-15. | CB05 simulation of two xylene experiments in the EPA chamber at UCR. ....                                                                                                                                                 | 4-22 |
| Figure 4-16. | Bias in oxidant production ( $O_3$ -NO) at hours 1-6 in UCR chamber experiments for the CB05 and SAPRC99 mechanisms, by compound.....                                                                                     | 4-23 |

## 1. INTRODUCTION

The goals of this study were to develop updated versions of the Carbon Bond mechanism for use in EPA atmospheric modeling studies. The starting point for this study was version 4 of the Carbon Bond mechanism (CB4) developed in the late 1980s (Gery et al., 1989) as updated in the mid 1990s for EPA's "OTAG" study. An overview of the development history of CB4 and related mechanisms is given below.

The new version of the Carbon Bond mechanism is called CB05 because it was developed in 2005. The CB05 is a condensed mechanism of atmospheric oxidant chemistry that provides a basis for computer modeling studies of ozone, particulate matter (PM), visibility, acid deposition and air toxics issues. The CB05 mechanism updates developed for this study are as follows:

1. Incorporating current kinetic and photolysis data in the core mechanism.
2. Extending the chemical mechanism to better support PM modeling needs such as formation of secondary organic aerosols (SOA).
3. Adding extra species and reactions to treat a number of volatile organic compounds (VOCs) explicitly for modeling air toxics.
4. Accounting for the role of reactive chlorine emissions in VOC degradation and oxidant chemistry.

The CB05 mechanism updates are discussed further in Section 2.

## HISTORY OF CB4

EPA sponsored the development of version IV of the Carbon Bond (CB4) in the late 1980's for use in urban and regional photochemical modeling and Gery et al., (1989), published the mechanism. The regional models of the late 1980's that utilized CB4 were more limited in domain extent than current regional models (e.g., formulated for the planetary boundary layer and not the upper troposphere) and the original CB4 was more appropriate for urban than regional scale modeling.

EPA made limited updates to the CB4 mechanism in the early 1990s. The three main updates were to PAN chemistry, radical termination reactions and isoprene chemistry and they culminated in the version of CB4 used for the Ozone Transport Assessment Group (OTAG) modeling and EPA's NO<sub>x</sub> SIP call. Two other versions of CB4 that have appeared since the OTAG version are CBM-Z and CB2002. These mechanisms are reviewed briefly below.

### The Urban Airshed Model Version of CB4

The EPA's Urban Airshed Model (UAM-IV; Morris and Myers, 1990) had the first widely used version of the CB4 mechanism. Changes from the Gery et al. (1989) mechanism were the inclusion of explicit chemistry for methanol and ethanol and an update to the PAN chemistry. Dodge (1991) updated the PAN chemistry for CB4 because the Gery et al. (1989) mechanism had incorrect temperature dependencies for PAN formation (Tuazon, Carter and Atkinson, 1991).

## **The OTAG Version of CB4**

The OTAG version of CB4 had two updates were made to better represent regional scale oxidant formation in the eastern US where high isoprene levels occur and rural areas have relatively low NO<sub>x</sub> concentrations. Yarwood updated the radical-radical termination reactions (among HO<sub>2</sub> and RO<sub>2</sub> radicals) to better represent oxidant formation under conditions of low NO<sub>x</sub> (Yarwood and Burton, 1994). Whitten updated the isoprene chemistry in the CB4 (Whitten et al., 1996) to reflect newer scientific data on the products and mechanisms of isoprene oxidation (Carter and Atkinson, 1996). The updated isoprene mechanism is a translation from SAPRC to CB4 species of Carter's condensed "1-product" isoprene mechanism (Carter, 1996).

## **CBM-Z – Pacific Northwest National Laboratory**

The Pacific Northwest National Laboratory (PNNL) has developed a mechanism based on the Carbon Bond approach called CBM-Z (Zaveri and Peters, 1999). Changes in CBM-Z were intended to update the mechanism from the published Gery et al., (1989) version and improve performance for regional scale modeling, and included:

- Revised inorganic chemistry.
- Explicit treatment of the lesser reactive alkanes - methane and ethane.
- Revised parameterizations of the reactive paraffin, olefin, and aromatic reactions.
- Inclusion of alkyl and acyl peroxy radical interactions and their reactions with the NO<sub>3</sub> radical.
- Inclusion of organic hydroperoxides.
- Isoprene chemistry based on the condensed one-product mechanism of Carter (1996).

The CBM-Z and CB4 were evaluated against smog chamber data from the TVA chamber and showed improved performance for CBM-Z on these chamber experiments. Sensitivity tests showed larger differences between CBM-Z and CB4 for regional modeling conditions than for urban or smog chamber conditions. One factor that contributed to differences under regional conditions (Zaveri and Peters, 1999) was the inclusion in CBM-Z of reactions for organic nitrates that slowly recycle nitrogen from an inactive form (organic nitrates) to an active form (NO<sub>x</sub>).

## **CB2002 – University of North Carolina**

In late 1990s, UNC started to update and re-evaluate the CB4 mechanism against smog chamber data. UNC's approach was to retain the overall structure of CB4 but update rate constants and some product yields based on recent data. The first mechanism produced by UNC was called CB99. Unfortunately, the CB99 work was completed just as literature values for a critical rate constant (OH + NO<sub>2</sub>) changed. UNC repeated the work with the new OH + NO<sub>2</sub> rate constant and developed CB2002 to supercede CB99 (Jeffries, Voicu, and Sexton, 2002). The CB2002 was evaluated against UNC smog chamber data as described in detail in Jeffries, Voicu, and Sexton (2002).

The main changes between CB2002 and CB4 were:

- Updated inorganic reaction rate constants with new reactions for  $\text{NO}_3$  reacting with OH,  $\text{HO}_2$  and itself, and  $\text{O}_3$  reacting with  $\text{O}(^3\text{P})$ .
- A new HONO photolysis reaction yielding  $\text{NO}_2$  and H-atoms. IUPAC (2004) now recommends setting this reaction to zero for tropospheric conditions.
- New rate constants for  $\text{N}_2\text{O}_5$  reacting with water (Wahner et al., 1998). This update also includes a reaction of  $\text{N}_2\text{O}_5$  with water dimers (i.e.,  $\text{N}_2\text{O}_5 + \text{H}_2\text{O} + \text{H}_2\text{O}$ ).
- Lower rate constants for radical-radical termination reactions involving  $\text{XO}_2$  and  $\text{HO}_2$ .
- New rate constants for all olefin reactions involving ETH, OLE and ISOP.
- New products for reactions of ETH and OLE.

## 2. MECHANISM UPDATES

The main CB05 mechanism is referred to as the core mechanism. There are two extensions to the core mechanism for modeling explicit species (e.g., toxics) and reactive chlorine chemistry. The core mechanism and extensions are described below. Finally, the process for mapping “real species” to CB05 “model species” is discussed (e.g., for emission inventory modeling).

### CB05 CORE MECHANISM

The core CB05 mechanism has 51 chemical species (Table 2-1) and 156 reactions (Table 2-2). The changes in the mechanism from CB4 (Gery et al., 1989) fall into the following categories that are discussed following Tables 2-1 and 2-2.

- Kinetic Updates
- Photolysis Updates
- Extended Inorganic Reaction Set
- Simple Alkanes (Methane and Ethane)
- Higher Aldehydes
- Alkenes with Internal Double Bonds
- Oxygenated Products and Intermediates
- Terpene Chemistry

**Table 2-1.** Species names for the CB05 core mechanism.

| Species Name | Description                                                                  | Number of Carbons |
|--------------|------------------------------------------------------------------------------|-------------------|
| NO           | Nitric oxide                                                                 | 0                 |
| NO2          | Nitrogen dioxide                                                             | 0                 |
| O3           | Ozone                                                                        | 0                 |
| O            | Oxygen atom in the O <sup>3</sup> (P) electronic state                       | 0                 |
| O1D          | Oxygen atom in the O <sup>1</sup> (D) electronic state                       | 0                 |
| OH           | Hydroxyl radical                                                             | 0                 |
| HO2          | Hydroperoxy radical                                                          | 0                 |
| H2O2         | Hydrogen peroxide                                                            | 0                 |
| NO3          | Nitrate radical                                                              | 0                 |
| N2O5         | Dinitrogen pentoxide                                                         | 0                 |
| HONO         | Nitrous acid                                                                 | 0                 |
| HNO3         | Nitric acid                                                                  | 0                 |
| PNA          | Peroxynitric acid (HNO <sub>4</sub> )                                        | 0                 |
| CO           | Carbon monoxide                                                              | 1                 |
| FORM         | Formaldehyde                                                                 | 1                 |
| ALD2         | Acetaldehyde                                                                 | 2                 |
| C2O3         | Acetylperoxy radical                                                         | 2                 |
| PAN          | Peroxyacetyl nitrate                                                         | 2                 |
| ALDX         | Propionaldehyde and higher aldehydes                                         | 2                 |
| CXO3         | C3 and higher acylperoxy radicals                                            | 2                 |
| PANX         | C3 and higher peroxyacyl nitrates                                            | 2                 |
| XO2          | NO to NO2 conversion from alkylperoxy (RO <sub>2</sub> ) radical             | 0                 |
| XO2N         | NO to organic nitrate conversion from alkylperoxy (RO <sub>2</sub> ) radical | 0                 |
| NTR          | Organic nitrate (RNO <sub>3</sub> )                                          | 1                 |
| ETOH         | Ethanol                                                                      | 2                 |

| Species Name | Description                                                       | Number of Carbons |
|--------------|-------------------------------------------------------------------|-------------------|
| CH4          | Methane                                                           | 1                 |
| MEO2         | Methylperoxy radical                                              | 1                 |
| MEOH         | Methanol                                                          | 1                 |
| MEPX         | Methylhydroperoxide                                               | 1                 |
| FACD         | Formic acid                                                       | 1                 |
| ETHA         | Ethane                                                            | 2                 |
| ROOH         | Higher organic peroxide                                           | 1                 |
| AACD         | Acetic and higher carboxylic acids                                | 2                 |
| PACD         | Peroxyacetic and higher peroxy-carboxylic acids                   | 2                 |
| PAR          | Paraffin carbon bond (C-C)                                        | 1                 |
| ROR          | Secondary alkoxy radical                                          | 0                 |
| ETH          | Ethene                                                            | 2                 |
| OLE          | Terminal olefin carbon bond (R-C=C)                               | 2                 |
| IOLE         | Internal olefin carbon bond (R-C=C-R)                             | 4                 |
| ISOP         | Isoprene                                                          | 5                 |
| ISPD         | Isoprene product (lumped methacrolein, methyl vinyl ketone, etc.) | 4                 |
| TERP         | Terpene                                                           | 10                |
| TOL          | Toluene and other monoalkyl aromatics                             | 7                 |
| XYL          | Xylene and other polyalkyl aromatics                              | 8                 |
| CRES         | Cresol and higher molecular weight phenols                        | 8                 |
| TO2          | Toluene-hydroxyl radical adduct                                   | 7                 |
| OPEN         | Aromatic ring opening product                                     | 4                 |
| CRO          | Methylphenoxy radical                                             | 7                 |
| MGLY         | Methylglyoxal and other aromatic products                         | 3                 |
| SO2          | Sulfur dioxide                                                    | 0                 |
| SULF         | Sulfuric acid (gaseous)                                           | 0                 |

**Table 2-2.** Reactions in the CB05 core mechanism.

| Label | Reactants | Products | Rate Expression                | Notes |
|-------|-----------|----------|--------------------------------|-------|
| R1    | NO2       | NO + O   | 1.0 x <NO2_SAPRC99>            | 20    |
| R2    | O+O2+M    | O3 + M   | 6.0E-34^-2.4                   | 1     |
| R3    | O3+NO     | NO2      | 3.0E-12 @ 1500                 | 1     |
| R4    | O+NO2     | NO       | 5.6E-12 @ -180                 | 1     |
| R5    | O+NO2     | NO3      | 2.5E-31^-1.8 &<br>2.2E-11^-0.7 | 1     |
| R6    | O+NO      | NO2      | 9.0E-32^-1.5 & 3.0E-11         | 1     |
| R7    | NO2+O3    | NO3      | 1.2E-13 @ 2450                 | 1     |
| R8    | O3        | O        | 1.0 x <O3_O3P_IUPAC05>         | 2     |
| R9    | O3        | O1D      | 1.0 x <O3_O1D_IUPAC05>         | 2     |
| R10   | O1D+M     | O + M    | 2.1E-11 @ -102                 | 1     |
| R11   | O1D+H2O   | 2*OH     | 2.20E-10                       | 1     |
| R12   | O3+OH     | HO2      | 1.7E-12 @ 940                  | 1     |
| R13   | O3+HO2    | OH       | 1.0E-14 @ 490                  | 1     |
| R14   | NO3       | NO2 + O  | 1.0 x <NO3NO2_SAPRC99>         | 20    |
| R15   | NO3       | NO       | 1.0 x <NO3NO_SAPRC99>          | 20    |
| R16   | NO3+NO    | 2*NO2    | 1.5E-11 @ -170                 | 1     |
| R17   | NO3+NO2   | NO + NO2 | 4.5E-14 @ 1260                 | 1     |
| R18   | NO3+NO2   | N2O5     | 2.0E-30^-4.4 &                 | 1     |

| Label | Reactants    | Products                                            | Rate Expression                                                      | Notes |
|-------|--------------|-----------------------------------------------------|----------------------------------------------------------------------|-------|
|       |              |                                                     | $1.4E-12^{-0.7}$                                                     |       |
| R19   | N2O5+H2O     | 2*HNO3                                              | $2.50E-22$                                                           | 2     |
| R20   | N2O5+H2O+H2O | 2*HNO3                                              | $1.80E-39$                                                           | 2     |
| R21   | N2O5         | NO3 + NO2                                           | $1E-03^{-3.5}$ @ 11000 &<br>$9.7E14^{0.1}$ @ 11080 &<br>0.45 & 1.0   | 2     |
| R22   | NO+NO+O2     | 2*NO2                                               | $3.3E-39$ @ -530                                                     | 2     |
| R23   | NO+NO2+H2O   | 2*HONO                                              | $5.00E-40$                                                           | 3     |
| R24   | NO+OH        | HONO                                                | $7.0E-31^{-2.6}$ &<br>$3.6E-11^{-0.1}$                               | 1     |
| R25   | HONO         | NO + OH                                             | $1.0 \times <HONO\_IUPAC05>$                                         | 2     |
| R26   | OH+HONO      | NO2                                                 | $1.8E-11$ @ 390                                                      | 1     |
| R27   | HONO+HONO    | NO + NO2                                            | $1.00E-20$                                                           | 4     |
| R28   | NO2+OH       | HNO3                                                | $2.0E-30^{-3.0}$ & $2.5E-11$                                         | 1     |
| R29   | OH+HNO3      | NO3                                                 | $\%2 \ 2.4E-14$ @ -460 &<br>$2.7E-17$ @ -2199 &<br>$6.5E-34$ @ -1335 | 1     |
| R30   | HO2+NO       | OH + NO2                                            | $3.5E-12$ @ -250                                                     | 1     |
| R31   | HO2+NO2      | PNA                                                 | $1.8E-31^{-3.2}$ & $4.7E-12$ &<br>0.6                                | 2     |
| R32   | PNA          | HO2 + NO2                                           | $4.1E-5$ @ 10650 &<br>$4.8E15$ @ 11170 & 0.6                         | 2     |
| R33   | OH+PNA       | NO2                                                 | $1.3E-12$ @ -380                                                     | 1     |
| R34   | HO2+HO2      | H2O2                                                | $\%3 \ 2.3E-13$ @ -600 &<br>$1.7E-33$ @ -1000                        | 1     |
| R35   | HO2+HO2+H2O  | H2O2                                                | $\%3 \ 3.22E-34$ @ -2800 &<br>$2.38E-54$ @ -3200                     | 1     |
| R36   | H2O2         | 2*OH                                                | $1.0 \times <H2O2\_SAPRC99>$                                         | 20    |
| R37   | OH+H2O2      | HO2                                                 | $2.9E-12$ @ 160                                                      | 1     |
| R38   | O1D+H2       | OH + HO2                                            | $1.10E-10$                                                           | 1     |
| R39   | OH+H2        | HO2                                                 | $5.5E-12$ @ 2000                                                     | 1     |
| R40   | OH+O         | HO2                                                 | $2.2E-11$ @ -120                                                     | 1     |
| R41   | OH+OH        | O                                                   | $4.2E-12$ @ 240                                                      | 1     |
| R42   | OH+OH        | H2O2                                                | $6.9E-31^{-1.0}$ & $2.6E-11^{0}$                                     | 1     |
| R43   | OH+HO2       |                                                     | $4.8E-11$ @ -250                                                     | 1     |
| R44   | HO2+O        | OH                                                  | $3.0E-11$ @ -200                                                     | 1     |
| R45   | H2O2+O       | OH + HO2                                            | $1.4E-12$ @ 2000                                                     | 1     |
| R46   | NO3+O        | NO2                                                 | $1.00E-11$                                                           | 1     |
| R47   | NO3+OH       | HO2 + NO2                                           | $2.20E-11$                                                           | 1     |
| R48   | NO3+HO2      | HNO3                                                | $3.50E-12$                                                           | 1     |
| R49   | NO3+O3       | NO2                                                 | $1.00E-17$                                                           | 5     |
| R50   | NO3+NO3      | 2*NO2                                               | $8.5E-13$ @ 2450                                                     | 1     |
| R51   | PNA          | $0.610*HO2 + 0.610*NO2 + 0.390*OH +$<br>$0.390*NO3$ | $1.0 \times <HO2NO2\_IUPAC05>$                                       | 2     |
| R52   | HNO3         | OH + NO2                                            | $1.0 \times <HNO3\_IUPAC05>$                                         | 2     |
| R53   | N2O5         | NO2 + NO3                                           | $1.0 \times <N2O5\_IUPAC05>$                                         | 2     |
| R54   | XO2+NO       | NO2                                                 | $2.6E-12$ @ -365                                                     | 6     |

| Label | Reactants | Products                                                      | Rate Expression                       | Notes |
|-------|-----------|---------------------------------------------------------------|---------------------------------------|-------|
| R55   | XO2N+NO   | NTR                                                           | 2.6E-12 @ -365                        | 6     |
| R56   | XO2+HO2   | ROOH                                                          | 7.5E-13 @ -700                        | 7     |
| R57   | XO2N+HO2  | ROOH                                                          | 7.5E-13 @ -700                        | 7     |
| R58   | XO2+XO2   |                                                               | 6.80E-14                              | 8     |
| R59   | XO2N+XO2N |                                                               | 6.80E-14                              | 8     |
| R60   | XO2+XO2N  |                                                               | 6.80E-14                              | 8     |
| R61   | NTR+OH    | HNO3 + HO2 + 0.330*FORM + 0.330*ALD2 + 0.330*ALDX - 0.660*PAR | 5.9E-13 @ 360                         | 9     |
| R62   | NTR       | NO2 + HO2 + 0.330*FORM + 0.330*ALD2 + 0.330*ALDX - 0.660*PAR  | 1.0 x <NTR_IUPAC05>                   | 28    |
| R63   | ROOH+OH   | XO2 + 0.500*ALD2 + 0.500*ALDX                                 | 3.01E-12 @ -190                       | 1     |
| R64   | ROOH      | OH + HO2 + 0.500*ALD2 + 0.500*ALDX                            | 1.0 x <COOH_SAPRC99>                  | 20    |
| R65   | OH+CO     | HO2                                                           | %3 1.44E-13 @ 0.0 & 3.43E-33 @ 0.0    | 2     |
| R66   | OH+CH4    | MEO2                                                          | 2.45E-12 @ 1775                       | 1     |
| R67   | MEO2+NO   | FORM + HO2 + NO2                                              | 2.8E-12 @ -300                        | 1     |
| R68   | MEO2+HO2  | MEPX                                                          | 4.1E-13 @ -750                        | 1     |
| R69   | MEO2+MEO2 | 1.370*FORM + 0.740*HO2 + 0.630*MEOH                           | 9.5E-14 @ -390                        | 1     |
| R70   | MEPX+OH   | 0.700*MEO2 + 0.300*XO2 + 0.300*HO2                            | 3.8E-12 @ -200                        | 1     |
| R71   | MEPX      | FORM + HO2 + OH                                               | 1.0 x <COOH_SAPRC99>                  | 20    |
| R72   | MEOH+OH   | FORM + HO2                                                    | 7.3E-12 @ 620                         | 1     |
| R73   | FORM+OH   | HO2 + CO                                                      | 9.00E-12                              | 1     |
| R74   | FORM      | 2*HO2 + CO                                                    | 1.0 x <HCHO_R_SAPRC99>                | 20    |
| R75   | FORM      | CO                                                            | 1.0 x <HCHO_M_SAPRC99>                | 20    |
| R76   | FORM+O    | OH + HO2 + CO                                                 | 3.4E-11 @ 1600                        | 1     |
| R77   | FORM+NO3  | HNO3 + HO2 + CO                                               | 5.80E-16                              | 1     |
| R78   | FORM+HO2  | HCO3                                                          | 9.7E-15 @ -625                        | 2     |
| R79   | HCO3      | FORM + HO2                                                    | 2.4E+12 @ 7000                        | 1     |
| R80   | HCO3+NO   | FACD + NO2 + HO2                                              | 5.60E-12                              | 1     |
| R81   | HCO3+HO2  | MEPX                                                          | 5.6E-15 @ -2300                       | 1     |
| R82   | FACD+OH   | HO2                                                           | 4.00E-13                              | 1     |
| R83   | ALD2+O    | C2O3 + OH                                                     | 1.8E-11 @ 1100                        | 1     |
| R84   | ALD2+OH   | C2O3                                                          | 5.6E-12 @ -270                        | 1     |
| R85   | ALD2+NO3  | C2O3 + HNO3                                                   | 1.4E-12 @ 1900                        | 1     |
| R86   | ALD2      | MEO2 + CO + HO2                                               | 1.0 x <CCHO_R_SAPRC99>                | 20    |
| R87   | C2O3+NO   | MEO2 + NO2                                                    | 8.1E-12 @ -270                        | 1     |
| R88   | C2O3+NO2  | PAN                                                           | 2.7E-28^-7.1 & 1.2E-11^-0.9 & 0.3     | 2     |
| R89   | PAN       | C2O3 + NO2                                                    | 4.9E-3 @ 12100 & 5.4E16 @ 13830 & 0.3 | 2     |
| R90   | PAN       | C2O3 + NO2                                                    | 1.0 x <PAN_IUPAC05>                   | 2     |
| R91   | C2O3+HO2  | 0.800*PACD + 0.200*AACD + 0.200*O3                            | 4.3E-13 @ -1040                       | 1     |
| R92   | C2O3+MEO2 | 0.900*MEO2 + 0.900*HO2 + FORM + 0.100*AACD                    | 2.0E-12 @ -500                        | 1     |
| R93   | C2O3+XO2  | 0.900*MEO2 + 0.100*AACD                                       | 4.4E-13 @ -1070                       | 2     |

| Label | Reactants | Products                                                                                                    | Rate Expression                                            | Notes |
|-------|-----------|-------------------------------------------------------------------------------------------------------------|------------------------------------------------------------|-------|
| R94   | C2O3+C2O3 | 2*MEO2                                                                                                      | 2.9E-12 @ -500                                             | 1     |
| R95   | PACD+OH   | C2O3                                                                                                        | 4.0E-13 @ -200                                             | 10    |
| R96   | PACD      | MEO2 + OH                                                                                                   | 0.0 x <COOH_SAPRC99>                                       | 20    |
| R97   | AACD+OH   | MEO2                                                                                                        | 4.0E-13 @ -200                                             | 1     |
| R98   | ALDX+O    | CXO3 + OH                                                                                                   | 1.3E-11 @ 870                                              | 11    |
| R99   | ALDX+OH   | CXO3                                                                                                        | 5.1E-12 @ -405                                             | 2     |
| R100  | ALDX+NO3  | CXO3 + HNO3                                                                                                 | 6.50E-15                                                   | 2     |
| R101  | ALDX      | MEO2 + CO + HO2                                                                                             | 1.0 x <C2CHO_SAPRC99>                                      | 20    |
| R102  | CXO3+NO   | ALD2 + NO2 + HO2 + XO2                                                                                      | 6.7E-12 @ -340                                             | 2     |
| R103  | CXO3+NO2  | PANX                                                                                                        | 2.7E-28 <sup>-7.1</sup> &<br>1.2E-11 <sup>-0.9</sup> & 0.3 | 12    |
| R104  | PANX      | CXO3 + NO2                                                                                                  | 4.9E-3 @ 12100 &<br>5.4E16 @ 13830 & 0.3                   | 12    |
| R105  | PANX      | CXO3 + NO2                                                                                                  | 1.0 x <PAN_IUPAC05>                                        | 2     |
| R106  | PANX+OH   | ALD2 + NO2                                                                                                  | 3.00E-13                                                   | 13    |
| R107  | CXO3+HO2  | 0.800*PACD + 0.200*AACD + 0.200*O3                                                                          | 4.3E-13 @ -1040                                            | 14    |
| R108  | CXO3+MEO2 | 0.900*ALD2 + 0.900*XO2 + HO2 + 0.100*AACD + 0.100*FORM                                                      | 2.0E-12 @ -500                                             | 15    |
| R109  | CXO3+XO2  | 0.900*ALD2 + 0.100*AACD                                                                                     | 4.4E-13 @ -1070                                            | 16    |
| R110  | CXO3+CXO3 | 2*ALD2 + 2*XO2 + 2*HO2                                                                                      | 2.9E-12 @ -500                                             | 1     |
| R111  | CXO3+C2O3 | MEO2 + XO2 + HO2 + ALD2                                                                                     | 2.9E-12 @ -500                                             | 1     |
| R112  | PAR+OH    | 0.870*XO2 + 0.130*XO2N + 0.110*HO2 + 0.060*ALD2 - 0.110*PAR + 0.760*ROR + 0.050*ALDX                        | 8.10E-13                                                   | 17    |
| R113  | ROR       | 0.960*XO2 + 0.600*ALD2 + 0.940*HO2 - 2.100*PAR + 0.040*XO2N + 0.020*ROR + 0.500*ALDX                        | 1.0E+15 @ 8000                                             | 17    |
| R114  | ROR       | HO2                                                                                                         | 1.60E+03                                                   | 17    |
| R115  | ROR+NO2   | NTR                                                                                                         | 1.50E-11                                                   | 17    |
| R116  | O+OLE     | 0.200*ALD2 + 0.300*ALDX + 0.300*HO2 + 0.200*XO2 + 0.200*CO + 0.200*FORM + 0.010*XO2N + 0.200*PAR + 0.100*OH | 1.E-11 @ 280                                               | 18    |
| R117  | OH+OLE    | 0.800*FORM + 0.330*ALD2 + 0.620*ALDX + 0.800*XO2 + 0.950*HO2 - 0.700*PAR                                    | 3.20E-11                                                   | 21    |
| R118  | O3+OLE    | 0.180*ALD2 + 0.740*FORM + 0.320*ALDX + 0.220*XO2 + 0.100*OH + 0.330*CO + 0.440*HO2 - PAR                    | 6.5E-15 @ 1900                                             | 22    |
| R119  | NO3+OLE   | NO2 + FORM + 0.910*XO2 + 0.090*XO2N + 0.560*ALDX + 0.350*ALD2 - PAR                                         | 7E-13 @ 2160                                               | 23    |
| R120  | O+ETH     | FORM + 1.700*HO2 + CO + 0.700*XO2 + 0.300*OH                                                                | 1.04E-11 @ 792                                             | 4     |
| R121  | OH+ETH    | XO2 + 1.560*FORM + 0.220*ALDX + HO2                                                                         | 1.0E-28 <sup>-0.8</sup> & 8.8E-12                          | 1     |
| R122  | O3+ETH    | FORM + 0.630*CO + 0.130*HO2 + 0.130*OH + 0.370*FACD                                                         | 1.2E-14 @ 2630                                             | 1     |
| R123  | NO3+ETH   | NO2 + XO2 + 2.0*FORM                                                                                        | 3.3E-12 @ 2880                                             | 2     |
| R124  | IOLE+O    | 1.240*ALD2 + 0.660*ALDX + 0.100*HO2 + 0.100*XO2 + 0.100*CO + 0.100*PAR                                      | 2.3E-11                                                    | 26    |
| R125  | IOLE+OH   | 1.300*ALD2 + 0.700*ALDX + HO2 + XO2                                                                         | 1.0E-11 @ -550                                             | 26    |
| R126  | IOLE+O3   | 0.650*ALD2 + 0.350*ALDX + 0.250*FORM + 0.250*CO + 0.500*O + 0.500*OH + 0.500*HO2                            | 8.4E-15 @ 1100                                             | 26    |

| Label | Reactants | Products                                                                                                                   | Rate Expression             | Notes |
|-------|-----------|----------------------------------------------------------------------------------------------------------------------------|-----------------------------|-------|
| R127  | IOL+NO3   | 1.180*ALD2 + 0.640*ALDX + HO2 + NO2                                                                                        | 9.6E-13 @ 270               | 26    |
| R128  | TOL+OH    | 0.440*HO2 + 0.080*XO2 + 0.360*CRES + 0.560*TO2                                                                             | 1.8E-12 @ -355              | 24    |
| R129  | TO2+NO    | 0.900*NO2 + 0.900*HO2 + 0.900*OPEN + 0.100*NTR                                                                             | 8.10E-12                    | 17    |
| R130  | TO2       | CRES + HO2                                                                                                                 | 4.2                         | 17    |
| R131  | OH+CRES   | 0.400*CRO + 0.600*XO2 + 0.600*HO2 + 0.300*OPEN                                                                             | 4.10E-11                    | 17    |
| R132  | CRES+NO3  | CRO + HNO3                                                                                                                 | 2.20E-11                    | 17    |
| R133  | CRO+NO2   | NTR                                                                                                                        | 1.40E-11                    | 17    |
| R134  | CRO+HO2   | CRES                                                                                                                       | 5.50E-12                    | 25    |
| R135  | OPEN      | C2O3 + HO2 + CO                                                                                                            | 9.0 x <HCHO_R_SAPRC99>      | 20    |
| R137  | OPEN+O3   | 0.030*ALDX + 0.620*C2O3 + 0.700*FORM + 0.030*XO2 + 0.690*CO + 0.080*OH + 0.760*HO2 + 0.200*MGLY                            | 5.4E-17 @ 500               | 17    |
| R138  | OH+XYL    | 0.700*HO2 + 0.500*XO2 + 0.200*CRES + 0.800*MGLY + 1.100*PAR + 0.300*TO2                                                    | 1.7E-11 @ -116              | 17    |
| R139  | OH+MGLY   | XO2 + C2O3                                                                                                                 | 1.7E-11                     | 17    |
| R140  | MGLY      | C2O3 + HO2 + CO                                                                                                            | 1.0 x <MGLY_IUPAC05>        | 2     |
| R141  | O+ISOP    | 0.750*ISPD + 0.500*FORM + 0.250*XO2 + 0.250*HO2 + 0.250*CXO3 + 0.250*PAR                                                   | 3.60E-11                    | 19    |
| R142  | OH+ISOP   | 0.912*ISPD + 0.629*FORM + 0.991*XO2 + 0.912*HO2 + 0.088*XO2N                                                               | 2.54E-11 @ -407.6           | 19    |
| R143  | O3+ISOP   | 0.650*ISPD + 0.600*FORM + 0.200*XO2 + 0.066*HO2 + 0.266*OH + 0.200*CXO3 + 0.150*ALDX + 0.350*PAR + 0.066*CO                | 7.86E-15 @ 1912             | 19    |
| R144  | NO3+ISOP  | 0.200*ISPD + 0.800*NTR + XO2 + 0.800*HO2 + 0.200*NO2 + 0.800*ALDX + 2.400*PAR                                              | 3.03E-12 @ 448              | 19    |
| R145  | OH+ISPD   | 1.565*PAR + 0.167*FORM + 0.713*XO2 + 0.503*HO2 + 0.334*CO + 0.168*MGLY + 0.252*ALD2 + 0.210*C2O3 + 0.250*CXO3 + 0.120*ALDX | 3.36E-11                    | 19    |
| R146  | O3+ISPD   | 0.114*C2O3 + 0.150*FORM + 0.850*MGLY + 0.154*HO2 + 0.268*OH + 0.064*XO2 + 0.020*ALD2 + 0.360*PAR + 0.225*CO                | 7.10E-18                    | 19    |
| R147  | NO3+ISPD  | 0.357*ALDX + 0.282*FORM + 1.282*PAR + 0.925*HO2 + 0.643*CO + 0.850*NTR + 0.075*CXO3 + 0.075*XO2 + 0.150*HNO3               | 1.00E-15                    | 19    |
| R148  | ISPD      | 0.333*CO + 0.067*ALD2 + 0.900*FORM + 0.832*PAR + 1.033*HO2 + 0.700*XO2 + 0.967*C2O3                                        | 0.0036 x <ACROLEIN_SAPRC99> | 20    |
| R149  | TERP+O    | 0.150*ALDX + 5.12*PAR                                                                                                      | 3.60E-11                    | 20    |
| R150  | TERP+OH   | 0.750*HO2 + 1.250*XO2 + 0.250*XO2N + 0.280*FORM + 1.66*PAR + 0.470*ALDX                                                    | 1.5E-11 @ -449              | 20    |
| R151  | TERP+O3   | 0.570*OH + 0.070*HO2 + 0.760*XO2 + 0.180*XO2N + 0.240*FORM + 0.001*CO + 7.000*PAR + 0.210*ALDX + 0.390*CXO3                | 1.2E-15 @ 821               | 20    |
| R152  | TERP+NO3  | 0.470*NO2 + 0.280*HO2 + 1.030*XO2 + 0.250*XO2N + 0.470*ALDX + 0.530*NTR                                                    | 3.7E-12 @ -175              | 20    |
| R153  | SO2+OH    | SULF + HO2                                                                                                                 | 3.0E-31^~3.3 & 1.5E-12      | 1     |
| R154  | OH+ETOH   | HO2 + 0.900*ALD2 + 0.050*ALDX + 0.100*FORM + 0.100*XO2                                                                     | 6.9E-12 @ 230               | 1     |
| R155  | OH+ETHA   | 0.991*ALD2 + 0.991*XO2 + 0.009*XO2N + HO2                                                                                  | 8.7E-12 @ 1070              | 1     |

| Label | Reactants | Products                                                                        | Rate Expression | Notes |
|-------|-----------|---------------------------------------------------------------------------------|-----------------|-------|
| R156  | NO2+ISOP  | 0.200*ISPD + 0.800*NTR + XO2 + 0.800*HO2 +<br>0.200*NO + 0.800*ALDX + 2.400*PAR | 1.50E-19        | 19    |

## Table Notes:

Rate constants are in units of molecules cm<sup>-3</sup> and seconds<sup>-1</sup>

Read rate expressions as follows:

A / <J\_label>      k = A x j

A @ E      k = A x exp(-E/T)

A ^ B @ E      k = A x (T/300)<sup>B</sup> x exp(-E/T)

A<sup>o</sup> ^ B<sup>o</sup> @ E<sup>o</sup> &  
A<sup>∞</sup> ^ B<sup>∞</sup> @ E<sup>∞</sup> &  
F & n       $k = \left[ \frac{k^o[M]}{1 + k^o[M]/k^\infty} \right] F^G$       where       $G = \left[ 1 + \left( \frac{\log(k^o[M]/k^\infty)}{n} \right)^{-2} \right]^{-1}$

%2 A<sup>o</sup> @ E<sup>o</sup> &  
A<sub>2</sub> @ E<sub>2</sub> &  
A<sub>3</sub> @ E<sub>3</sub>       $k = k^o + \frac{k_3[M]}{1 + k_3[M]/k_2}$

%3 A<sub>1</sub> @ E<sub>1</sub> &  
A<sub>2</sub> @ E<sub>2</sub>      k = k<sub>1</sub> + k<sub>2</sub> [M]

- 1 Rate constant from NASA/JPL (2003)
- 2 Rate constant from IUPAC (2005)
- 3 Kaiser and Wu (1977)
- 4 Jeffries et al. (2002)
- 5 Hjorth (1992)
- 6 Based on NASA/JPL (2003) C2H5O2 + NO
- 7 Based on NASA/JPL (2003) C2H5O2 + HO2
- 8 Based on NASA/JPL (2003) C2H5O2 + C2H5O2
- 9 Average based on NASA/JPL (2003) CH3/C2H5 nitrates
- 10 Same as AACD+OH
- 11 Herron (1988)
- 12 Same as for PAN
- 13 Average based on NASA/JPL (2003) CH3/C2H5 nitrate ratio and IUPAC (2005) PAN+OH
- 14 NASA/JPL (2003) for CH3C(O)OO + HO2
- 15 NASA/JPL (2003) for CH3C(O)OO + CH3O2
- 16 IUPAC (2005) for CH3C(O)OO
- 17 Gery et al. (1989)
- 18 Cvetanovic (1987)
- 19 Atkinson and Carter (1994) single lumped product mechanism for isoprene.
- 20 SAPRC99
- 21 Consistent with IUPAC (2005) high-pressure limit for OH + propene. Falloff from the high-pressure limit isn't significant in the troposphere. Stoichiometric coefficients consistent with Atkinson (1997) and those developed and tested by Adelman (1999).
- 22 Rate constant consistent with IUPAC (2005) for O3 + propene. Products based on Gery et al. (1989) assuming a 2 to 1 product ratio of higher aldehydes (ALDX) to acetaldehyde (ALD2).
- 23 Rate constant from Canosa-Mas et al. (1991) for minor pathway. May need future adjustment.
- 24 Rate constant from Le Bras (1997), products from Gery et al. (1989).
- 25 Adelman (1999).
- 26 Ligocki, et al. (2002).
- 27 Homogeneous gas-phase reactions of N2O5 with water measured by Wahner, Mentel and Sohn (1998) and selected by IUPAC (2005). Rate contributions from heterogeneous reactions (see IUPAC 2005) may be added to the homogeneous rate.
- 28 IUPAC (2005) photolysis data for isopropyl nitrate.

## Kinetic Data

Kinetic data for rate constant expressions were updated from the most recent evaluations by the IUPAC and NASA/JPL review panels, as detailed in the notes to Table 2-2. In general, values from IUPAC (2005) were selected. NASA/JPL (2003) values were used in some cases where IUPAC did not provide evaluated data.

## Photolysis Data

Mechanism specific data required to calculate photolysis rates are absorption cross-sections and quantum yields. Photolysis data for CB05 are from the IUPAC (2005) evaluation or the SAPRC99 chemical mechanism (Carter, 2000). In general, data were used from SAPRC99 unless the IUPAC (2005) recommendations were found to be significantly different. Using the same data as SAPRC99 simplifies implementation in air quality models and promotes consistency between two mechanisms that may be compared.

## Extended Inorganic Reaction Set

Yarwood, Whitten and Rao (2005) reviewed the inorganic reaction set in the CB4 to identify reactions that should be added to account for conditions of temperature, pressure and chemical environment encountered in annual simulations at scales ranging from urban to continental. Seventeen reactions were added as discussed below. The extended inorganic reactions are summarized briefly here and discussed in more detail below.

Reactions of molecular hydrogen (38 and 39) are somewhat important to odd-hydrogen (OH and HO<sub>2</sub>) for very dry conditions in the upper troposphere. Including hydrogen will allow the air quality impacts of hydrogen as an alternative fuel to be evaluated. Hydrogen has a tropospheric background concentration of about 0.6 ppm (Novelli et al, 1999).

Reactions 40 to 45 involving odd-oxygen and odd-hydrogen species may be important for pristine conditions such as the upper troposphere. Including these reactions provides a more complete description of hydroxyl radical (OH) chemistry in the upper troposphere to improve modeling for persistent air toxics and mercury.

Additional NO<sub>3</sub> radical reactions (46 to 50) improve nighttime chemistry. NO<sub>3</sub> radical is the main driver for atmospheric chemistry at night and including additional NO<sub>3</sub> removal reactions improves the calculation of nighttime destruction rates for several types of reactive hydrocarbons (e.g., aldehydes, olefins) and for NO<sub>x</sub> (via NO<sub>3</sub> and N<sub>2</sub>O<sub>5</sub> reactions).

Additional NO<sub>x</sub> recycling reactions (51 to 53 and 61 to 62) improve the representation of the fate of NO<sub>x</sub> over multi-day timescales by slowly recycling nitrogen from inactive forms of NO<sub>z</sub> to NO<sub>x</sub>. Reactions 51 and 53 are potentially important for very cold conditions such as the upper troposphere. Reactions 52, 61 and 62 of nitric acid and organic nitrates are potentially important to regional ozone and oxidant chemistry in the lower troposphere (Zaveri and Peters, 1999).

## **Simple Alkanes (Methane and Ethane)**

Explicit reactions were added for OH with methane (CH<sub>4</sub>) and ethane (ETHA) to better describe the chemistry in remote atmospheres.

## **Higher Aldehydes**

A new higher aldehyde species (ALDX) was added based on propionaldehyde chemistry (Ligocki and Whitten, 1992). Note that ALDX and related species contain two carbon atoms, not three, because this simplifies. Species related to ALDX are the corresponding peroxyacyl radicals (CXO<sub>3</sub>), peroxy nitrates (PANX), carboxylic acids (AACD) and peroxy carboxylic acids (PACD). The species ALD2 and related species (C<sub>2</sub>O<sub>3</sub> and PAN) now explicitly represent the chemistry of acetaldehyde. An important difference between higher aldehydes and acetaldehyde is that they photolyse more rapidly because higher aldehydes have larger quantum yields than acetaldehyde. The benefits of including the lumped higher aldehyde (ALDX) in CB05 are that acetaldehyde becomes explicit for air toxics modeling, faster photolysis rates for higher aldehydes are better represented, and the degradation sequence for higher aldehydes becomes deeper (ALDX to ALD2 to FORM). ALDX also improves the representation of internal olefins, as discussed next.

## **Alkenes with Internal Double Bonds**

A new species (IOLE) was added to represent alkenes with internal double bonds (internal olefins) such as 2-butenes. IOLE is four carbon species. Internal olefins react very rapidly to produce photolytic products (aldehydes). Internal olefins were represented by their aldehyde products (e.g., 2-butene was represented as 2 ALD2) in the CB4. Including the explicit species IOLE in CB05 better describes the rate (kinetics) of internal olefin reactions than the CB4 approach. The IOLE chemistry is improved by having both acetaldehyde (ALD2) and lumped higher aldehydes (ALDX) as reaction products (Ligocki and Whitten, 1992).

## **Oxygenated Products and Intermediates**

Several oxygenated species were added in conjunction with methane. Methylperoxy radicals were added as an explicit species (MEO<sub>2</sub>) rather than representing them by XO<sub>2</sub>. This change allows explicit representation of the products of the methylperoxy self-reaction (formaldehyde and methanol) and the reaction between methylperoxy and hydroperoxy radicals (methyl hydroperoxide). This change is expected to improve the representation of peroxide products that are important in sulfate production.

Other organic peroxides also were added as products of peroxy radical reactions. Higher organic peroxides (ROOH) were added as products of XO<sub>2</sub> reacting with HO<sub>2</sub> with chemistry based on ethyl hydroperoxide reactions. Peroxycarboxylic acids were added based on peroxyacetic acid (PACD) as products of the reactions of peroxyacetyl (C<sub>2</sub>O<sub>3</sub>) and higher peroxyacyl (CXO<sub>3</sub>) radicals with HO<sub>2</sub>.

Two carboxylic acids were added as products of peroxy radical reactions. Formic acid (FACD) is produced by reactions of HO<sub>2</sub> with formaldehyde. Higher carboxylic acids were added based on acetic acid (AACD) as products of the reactions of peroxyacetyl (C<sub>2</sub>O<sub>3</sub>) and higher peroxyacetyl (CXO<sub>3</sub>) radicals with HO<sub>2</sub>.

## Terpene Chemistry

A new species TERP was added to CB05 to represent terpenes. The CB05 TERP chemistry is based on the SAPRC99 lumped terpene chemistry (Carter, 2000) translated to CB05 species.

## EXTENDED MECHANISM WITH EXPLICIT SPECIES

An extended version of CB05 was developed by adding explicit reactions for several organic compounds. Explicit chemistry was added for organic compounds that are air toxics and/or precursors to secondary organic aerosol. The explicit compounds were added as tracer species that are decayed by oxidants (OH, etc.) without perturbing the oxidant levels. This approach makes the extended mechanism independent of the core mechanism so that the explicit compounds in the extended mechanism could be used in conjunction with any core mechanism (e.g., CB05, CB4, SAPRC99). The reactions for the extended organic mechanism are listed in Table 2-3.

**Table 2-3.** Reactions in the extended CB05 mechanism that may be added to the core mechanism.

| Reaction Label | Reactants              | Products               | Rate Expression        |
|----------------|------------------------|------------------------|------------------------|
| T01            | PFRM + OH              | OH                     | 9.0E-12                |
| T02            | PFRM + NO <sub>3</sub> | NO <sub>3</sub>        | 5.8E-16                |
| T03            | PFRM + O               | O                      | 3.4E-11 @ 1600         |
| T04            | PFRM                   |                        | 1.0/<HCHO_R_SAPRC99>   |
| T05            | PFRM                   |                        | 1.0/<HCHO_M_SAPRC99>   |
| T06            | PACT + OH              | OH                     | 5.6E-12 @ -270         |
| T07            | PACT + NO <sub>3</sub> | NO <sub>3</sub>        | 1.4E-12 @ 1900         |
| T08            | PACT + O               | O                      | 1.8E-11 @ 1100         |
| T09            | PACT                   |                        | 1.0/<CCHO_R_SAPRC99>   |
| T10            | BUTD + OH              | OH + SACR              | 1.4E-11 @ -424.        |
| T11            | BUTD + O <sub>3</sub>  | O <sub>3</sub> + SACR  | 8.2E-15 @ 2070.        |
| T12            | BUTD + NO <sub>3</sub> | NO <sub>3</sub> + SACR | 1.79E-13               |
| T13            | BUTD + O               | O <sub>3</sub> + SACR  | 3.99E-12(T/298)**1.45  |
| T14            | PACR + OH              | OH                     | 2.0E-11                |
| T15            | PACR + O <sub>3</sub>  | O <sub>3</sub>         | 2.61E-19               |
| T16            | PACR + NO <sub>3</sub> | NO <sub>3</sub>        | 1.7E-11 @ 3131.        |
| T17            | PACR                   |                        | 1.0/<ACROLEIN_SAPRC99> |
| T18            | SACR + OH              | OH                     | 2.0E-11                |
| T19            | SACR + O <sub>3</sub>  | O <sub>3</sub>         | 2.61E-19               |
| T20            | SACR + NO <sub>3</sub> | NO <sub>3</sub>        | 1.7E-11 @ 3131.        |
| T21            | SACR                   |                        | 1.0/<ACROLEIN_SAPRC99> |
| T22            | TOLU + OH              | OH                     | 1.8E-12 @ -355.        |
| T23            | MXYL + OH              | OH                     | 1.7E-11 @ -116.        |
| T24            | OXYL + OH              | OH                     | 1.22E-11               |
| T25            | PXYL + OH              | OH                     | 1.3E-11                |
| T26            | APIN + O               | O                      | 2.79E-11               |

| Reaction Label | Reactants  | Products | Rate Expression  |
|----------------|------------|----------|------------------|
| T27            | APIN + OH  | OH       | 1.2E-11 @ -440.  |
| T28            | APIN + O3  | O3       | 6.3E-16 @ 580.   |
| T29            | APIN + NO3 | NO3      | 1.2E-12 @ -490.  |
| T30            | BPIN + O   | O        | 2.81E-11         |
| T31            | BPIN + OH  | OH       | 7.51E-11         |
| T32            | BPIN + O3  | O3       | 1.74E-15 @ 1260. |
| T33            | BPIN + NO3 | NO3      | 2.81E-11         |

## Explicit Air Toxics

The following explicit toxic species are included in the extended mechanism:

PFRM = primary formaldehyde  
 PACT = primary acetaldehyde  
 BUTD = 1,3-butadiene  
 PACR = primary acrolein  
 SACR = secondary acrolein from 1,3-butadiene

The primary formaldehyde and acetaldehyde species allow the contributions of these primary aldehydes to be quantified. For example, the species FORM in CB05 is the sum of primary and secondary formaldehyde. If PFRM is included in the mechanism, primary formaldehyde is given directly by PFRM and secondary formaldehyde is the difference FORM – PFRM. For this approach to work, emissions of formaldehyde must be mapped to both PFRM and FORM. This does not double count the oxidant formation potential of formaldehyde emissions because the PFRM species is oxidant neutral. In this approach, PFRM is a “tracer” species whereas FORM is an “active” species.

The same approach works for distinguishing primary from secondary acetaldehyde by using the tracer species PACT and the active species ALD2.

Acrolein is explicitly apportioned as primary and secondary by the tracer species PACR and SACR. SACR is formed in CB05 only by reaction of the BUTD tracer (1,3-butadiene), which is expected to be the dominant source of secondary acrolein in the atmosphere.

The mapping of real compounds to model species for tasks such as emissions processing is discussed below.

## Explicit Secondary Organic Aerosol Precursors

Secondary organic aerosol (SOA) formation is dominated by aromatics and biogenic terpene and sesquiterpene emissions (Odum et al., 1997). Aerosol yields can be attached to the corresponding lumped species in the CB05 core mechanism (TOL, XYL and TERP) to model SOA production. However, including explicit aromatics and terpene species in the extended mechanism can permit a more refined treatment of SOA production. The following explicit aromatics and terpenes are included in the extended mechanism:

TOLU = toluene  
MXYL = m-xylene  
OXYL = o-xylene  
PXYL = p-xylene  
APIN = alpha-pinene  
BPIN = beta-pinene

The methodology for using the CB05 explicit species to model SOA formation will depend upon how SOA formation is implemented in the host air quality model. In general, SOA formation is modeled by forming semi-volatile products (SVPs) in VOC reactions. The SVPs are partitioned between the gas and aerosol phase according to the ambient conditions (e.g., temperature, pre-existing aerosols). Yields of SVPs should be added to the CB05 explicit species reactions in a format (i.e., species names and yields) that is compatible with the host air quality model. Data on SVP yields are available from Odum et al., 1997 and other studies.

The explicit aromatic species also may be of interest as air toxics.

### Rate Constant Data

The rate constant data sources for species in the extended mechanism that are not also in the CB05 core mechanism are listed below.

OH + BUTD. Liu, A., W.A. Mulac, and C.D. Jonah (1992) "Rate constants for the gas phase reactions of OH radicals with 1,3 butadiene and allene at 1 atmosphere in Ar and over the temperature range 303-1173K" J. Phys. Chem. Vol. 92

O<sub>3</sub> + BUTD. Treacy, J., M. ElHag, D. O'Farrell, and H. Sidebottom (1992) "Reactions of ozone with unsaturated organic compounds" Ber. Bunsenges. Phys. Chem., Vol. 96, pp 422-7.

NO<sub>3</sub> + BUTD. Ellermann, T., O.J. Nielsen, and H. Skov (1992) "Absolute rate constants for the reactions of NO<sub>3</sub> radicals with a series of dienes at 295K" Chem. Phys. Lett., Vol. 200, pp. 224-9.

O(3P) + BUTD. Adusei, G.Y.; Fontijn, A 1993 "Kinetics of the reaction between O(3P) atoms and 1,3-butadiene between 280 and 1015 K" J. Phys. Chem, Vol. 97, pp 1406 – 1408.

OH + PACR. Orlando, J.J.; Tyndall, G.S. (2002) "Mechanisms for the reactions of OH with two unsaturated aldehydes: Crotonaldehyde and acrolein" J. Phys. Chem. A, Vol. 106, pp 12252 – 12259.

O<sub>3</sub> + PACR. Grosjean, D.; Grosjean, E.; Williams, E.L., II (1993) "Rate constants for the gas-phase reactions of ozone with unsaturated alcohols, esters, and carbonyls" Int. J. Chem. Kinet Vol 25, pp 783 – 794.

NO<sub>3</sub> + PACR. Cabanas, B.; Salgado, S.; Martin, P.; Baeza, M.T.; Martinez, E. (2001) "Night-time Atmospheric Loss Process for Unsaturated Aldehydes: Reaction with NO<sub>3</sub> Radicals" J. Phys. Chem. A: Vol. 105, pp 4440 – 4445.

- OH + OXYL and PXYL. Atkinson, R. and Aschmann S.M (1989) "Rate constants for the gas-phase reactions of the OH radical with a series of aromatic hydrocarbons at 296K" *Int. J. Chem. Kinet.*, Vol. 21, pp 355-365.
- OH + MXYL. Atkinson, R. (1986) "Kinetics and Mechanisms of the Gas Phase Reactions of the Hydroxyl Radical with Organic Compounds", *Chem. Rev.*, Vol. 86, pp 69-201.
- O + APIN and BPIN. Luo, D., J.A. Pierce, I.L. Malkina, and W.P.L. Carter (1996) "Rate constants for the reactions of O(3P) with selected monoterpenes" *Int. J. Chem. Kinet.*, Vol. 28, pp 1-8.
- OH, O3 and NO3 + APIN. IUPAC (2005)
- OH + BPIN. Foster, P., I. Denis and V. Jacob (1996) "Chap.7: Aerosol surface reactions and photocatalysis" in Vol. 2 of *Heterogeneous and Liquid Phase Processes* book, pp 191-196.
- O3 + BPIN. Khamaganor, V.G. and R.A. Hites (2001) "Rate Constants for the Gas-Phase Reactions of Ozone with Isoprene, alpha, and beta-Pinene, and Limonene as a Function of Temperature" *J. Phys. Chem. A.*, Vol. 105, pp 815-822.
- NO3 + BPIN. Kind, I., T. Berndt and O. Boge (1998) "Gas-phase rate constants for the reaction of NO3 radicals with a series of cyclic alkenes, 2-ethyl-1-butene and 2,3-dimethyl-1,3-butadiene" *Chem. Phys. Lett.*, Vol. 288, pp 111-118.

## REACTIVE CHLORINE CHEMISTRY

Tanaka et al. (2003) developed an extension to the CB4 mechanism with chlorine chemistry to evaluate the potential impact of reactive chlorine emissions (i.e., Cl<sub>2</sub> and HOCl) on tropospheric ozone formation. The Tanaka chlorine mechanism was reviewed and updated to be compatible with CB05. The reactions in Table 2-4 should be added to the CB05 core mechanism for modeling reactive chlorine. Table 2-5 identifies the species added for the reactive chlorine mechanism.

**Table 2-4.** Reactions in the CB05 reactive chlorine mechanism that may be added to the CB05 core mechanism.

| Reaction Label | Reactants | Products                                                                                   | Rate Expression   |
|----------------|-----------|--------------------------------------------------------------------------------------------|-------------------|
| CL1            | CL2       | 2 CL                                                                                       | 1.0 x <CL2_CB05>  |
| CL2            | HOCL      | OH + CL                                                                                    | 1.0 x <HOCL_CB05> |
| CL3            | CL + O3   | CLO                                                                                        | 2.3E-11 @ 200     |
| CL4            | CLO + CLO | 0.3 CL2 + 1.4 CL                                                                           | 1.63E-14          |
| CL5            | CLO + NO  | CL + NO2                                                                                   | 6.4E-12 @ -290    |
| CL6            | CLO + HO2 | HOCL                                                                                       | 2.7E-12 @ -220    |
| CL7            | OH + FMCL | CL + CO                                                                                    | 5.0E-13           |
| CL8            | FMCL      | CL + CO + HO2                                                                              | 1.0 x <FMCL_CB05> |
| CL9            | CL + CH4  | HCL + MEO2                                                                                 | 6.6E-12 @ 1240    |
| CL10           | CL + PAR  | HCL + 0.870*XO2 + 0.130*XO2N + 0.110*HO2 + 0.060*ALD2 - 0.110*PAR + 0.760*ROR + 0.050*ALDX | 5.0E-11           |
| CL11           | CL + ETHA | HCL + 0.991*ALD2 + 0.991*XO2 + 0.009*XO2N +                                                | 8.3-11 @ 100      |

| Reaction Label | Reactants | Products                                                                                                               | Rate Expression |
|----------------|-----------|------------------------------------------------------------------------------------------------------------------------|-----------------|
|                |           | HO2                                                                                                                    |                 |
| CL12           | CL + ETH  | FMCL + 2.000* $\text{XO}_2$ + 1.000* $\text{HO}_2$ + 1.000*FORM                                                        | 1.07E-10        |
| CL13           | CL + OLE  | FMCL + 0.330*ALD2 + 0.670*ALDX + 2.000* $\text{XO}_2$ + 1.000* $\text{HO}_2$ - 1.000*PAR                               | 2.5E-10         |
| CL14           | CL + IOLE | 0.300*HCL + 0.700*FMCL + 0.450*ALD2 + 0.550*ALDX + 0.300*OLE + 0.300*PAR + 2.000* $\text{XO}_2$ + 1.000* $\text{HO}_2$ | 3.5E-10         |
| CL15           | CL + ISOP | 0.15HCL + 1.000* $\text{XO}_2$ + 1.000* $\text{HO}_2$ + 0.850*FMCL + 1.000*ISPD                                        | 4.3E-10         |
| CL16           | CL + FORM | HCL + 1.000* $\text{HO}_2$ + 1.000*CO                                                                                  | 8.2E-11 @ 34    |
| CL17           | CL + ALD2 | HCL + C2O3                                                                                                             | 7.9-11          |
| CL18           | CL + ALDX | HCL + CXO3                                                                                                             | 1.3E-10         |
| CL19           | CL + MEOH | HCL + 1.000* $\text{HO}_2$ + 1.000*FORM                                                                                | 5.5-11          |
| CL20           | CL + ETOH | HCL + 1.000* $\text{HO}_2$ + 1.000*ALD2                                                                                | 8.2-11 @ -45    |

**Table 2-5.** Species added to CB05 by the reactive chlorine mechanism.

| Species Name | Description               |
|--------------|---------------------------|
| CL2          | Molecular chlorine        |
| HOCL         | Hypochlorous acid         |
| CL           | Chlorine atom             |
| CLO          | Chlorine monoxide         |
| FMCL         | Formyl chloride (HC(O)Cl) |

Considerations in updating the reactive chlorine mechanism for CB05 are:

1. Reaction rate constants were updated from Tanaka et al (2003) using the latest IUPAC (2005) recommendations except as described below.
2. CH<sub>4</sub> is added as an explicit species and the Cl + CH<sub>4</sub> are products updated to be explicit methylperoxy radical.
3. The Cl + PAR products are updated to be the same as OH + PAR in CB05. The Cl + PAR rate is an average over the absolute rates (on a per carbon atom basis) of the alkanes listed by in Tanaka et al (2003).
4. The Cl + OLE rate is updated to an average over the absolute rates (on a per C=C basis) for the alkenes presented in Tanaka et al (2003). Reaction products assume that reaction with C=C goes by addition and that the Cl atom ends up in a carbonyl compound, represented by formyl chloride (HC(O)Cl) as a surrogate. Other carbonyl products are ALD2 and ALDX by analogy with OH + OLE reaction. Note that in CB05 there is no need to consider H-abstraction from paraffinic carbons adjacent to the C=C group because OLE is a 2 carbon species (C=C).
5. The Cl + IOLE reaction is added. The rate is estimated as the rate for Cl reacting with OLE + 2 PAR because IOLE is a 4 carbon species, whereas OLE is a 2 carbon species. The products assume that reaction goes 70% by Cl-addition and 30% by H-abstraction, consistent with the rate constant assumption. The products for each channel are assumed to be:

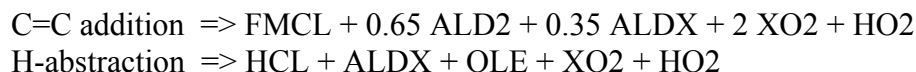

Cl-addition reactions are assumed to form acyl chlorides that are represented by formyl chloride (FMCL) as a surrogate, plus aldehydes that are split between ALD2 and ALDX by analogy with the OH + IOLE reaction. H-abstraction is assumed to form HCl plus unsaturated carbonyls that are represented as ALDX + OLE.

6. The Cl + isoprene chemistry is extensively revised from Tanaka et al. (2003). The goal of Tanaka et al. was to track a unique marker for the Cl + ISOP reaction to permit comparison with ambient data. The goal for CB05 is to track the fate of the Cl and the fate of the carbon in isoprene. The HCl and FMCL yields reflect the balance between H-abstraction and addition pathways of 15% and 85% (Personal communication from Dr. Renyi Zhang, Texas A&M University: manuscript submitted). FMCL acts as a surrogate for the fate of all Cl-addition pathways. The lumped isoprene oxidation product from the CB05 mechanism (ISPD) accounts for the carbon containing products.
7. FMCL (formyl chloride) serves as a surrogate for all products where chlorine is incorporated into a chlorocarbonyl after an addition reaction, i.e., for olefins. The purpose is to account for sequestration of Cl in an organic molecule (chlorocarbonyl) allowing for the Cl to return later as a Cl-atom after the chlorocarbonyl reacts with OH or photolyses.
8. Reactions of Cl-atoms with aldehydes (ALD2 and ALDX) are included with rate constants from IUPAC (2005) and products the same as corresponding OH reactions. The organic products of Cl + ALDX are uncertain because there may be H-abstraction at the paraffinic carbon atoms of higher aldehydes.
9. No Cl-atom reactions are included for TOL, XYL or TERP because the products are uncertain. Omitting these reactions may not greatly alter the fate of Cl-atoms because, unlike OH, Cl-atoms react rapidly with all VOCs. For example, the global background for methane of ~1.7 ppm provides a significant “universal” sink for Cl-atoms because Cl-atoms react quite rapidly with methane.
10. The self-reaction of ClO radicals is added to account for situations where intense sources of ClO (e.g., high Cl<sub>2</sub> emissions) exceed the availability of NO or HO<sub>2</sub> to act as sinks for ClO. The products of the ClO self-reaction are highly condensed to approximate the final products under tropospheric conditions.
11. No Cl-atom reaction with NO<sub>2</sub> is included because the product ClNO<sub>2</sub> photolyses rapidly.

## CHEMICAL SPECIES MAPPING FOR CB05 MECHANISMS

An integral part of any condensed chemical mechanism is the assignment from real world organic species to the lumped species of the condensed mechanism. The existing chemical species mapping for CB4 was updated for CB05. The changes were:

1. All assignments to 2 ALD2 representing internal olefins were changed to IOLE. Note that internal olefins substituted at the double bond are different, as described next.
2. All remaining ALD2 assignments were changed to ALDX except for acetaldehyde, 2-methyl-2-butene and 3-substituted alk-2-enes (which remain assigned to n PAR + ALD2). Alkenes that are branched at the double bond are represented as aldehyde + PAR because their dominant reaction products (e.g., acetone plus acetaldehyde from 2-methyl-2-butene) are less reactive than the IOLE.
3. Terpenes were mapped to TERP

A list of mappings from real organic species to CB05 model species is provided in Appendix A.

The following species mapping changes apply specifically to the extended version of the CB05 mechanism:

4. Formaldehyde is mapped to PFRM as well as FORM
5. Acetaldehyde is mapped to PACT as well as ALD2
6. 1,3-Butadiene is mapped to BUTD as well as 2 OLE
7. Acrolein is mapped to PACR as well as 0.5 OLE plus ALDX
8. Toluene is mapped to TOLU as well as TOL
9. p-Xylene is mapped to PXYL as well as XYL
10. o-Xylene is mapped to OXYL as well as XYL
11. m-Xylene is mapped to MXYL as well as XYL
12.  $\alpha$ -Pinene is mapped to APIN as well as TERP
13.  $\beta$ -Pinene is mapped to APIN as well as TERP

No changes to species mappings for organic compounds are required for the CB05 reactive chlorine mechanism. However, emission inventory preparation for the CB05 reactive chlorine mechanism should consider sources of reactive chlorine ( $\text{Cl}_2$  and  $\text{HOCl}$ ).

### 3. CB05 IMPLEMENTATION TESTING

EPA is implementing the CB05 mechanism into the CMAQ air quality model. Tests were performed to confirm that the CMAQ implementation is correct. Independent rate constant calculations performed by SmogReyes and EPA checked the kinetic rate constant expressions. Independent box model simulations by the same groups checked the complete mechanism implementation, i.e., the reactions, photolysis data and rate constant data. Box model calculations also compared the CB05 mechanism to CB4, and these comparisons are discussed first.

#### COMPARING CB05 TO CB4

The CB05 mechanism was implemented in the OZIPM box model for comparison with CB4 as shown in Figure 3-1. The version of CB4 compared is the OTAG version of CB4 (discussed in Section 1). The scenario modeled is an MIR (maximum incremental reactivity) condition with an urban emissions mix of VOCs and NO<sub>x</sub>. The MIR condition has low VOC/NO<sub>x</sub> ratio where adding VOC has the greatest incremental impact on the ozone production rate. The VOC composition used for CB4 and CB05 is compared in Table 3-1 on a moles carbon basis. The difference from CB4 to CB05 is that ALD2 is disaggregated to ALD2, IOLE and ALDX.

**Table 3-1.** VOC composition used for the box model comparison of CB4 and CB05.

| CB Species   | Fractional Contribution to Moles Carbon |              |
|--------------|-----------------------------------------|--------------|
|              | CB4                                     | CB05         |
| PAR          | 0.675                                   | 0.675        |
| ETH          | 0.045                                   | 0.045        |
| OLE          | 0.034                                   | 0.034        |
| TOL          | 0.116                                   | 0.116        |
| XYL          | 0.078                                   | 0.078        |
| MEOH         | 0.001                                   | 0.001        |
| ETOH         | 0.009                                   | 0.009        |
| ISOP         | 0.5                                     | 0.5          |
| CRES         | 0.002                                   | 0.002        |
| FORM         | 0.009                                   | 0.009        |
| ALD2         | 0.027                                   | 0.006        |
| IOLE         | N/A                                     | 0.018        |
| ALDX         | N/A                                     | 0.003        |
| <b>Total</b> | <b>1.496</b>                            | <b>1.496</b> |

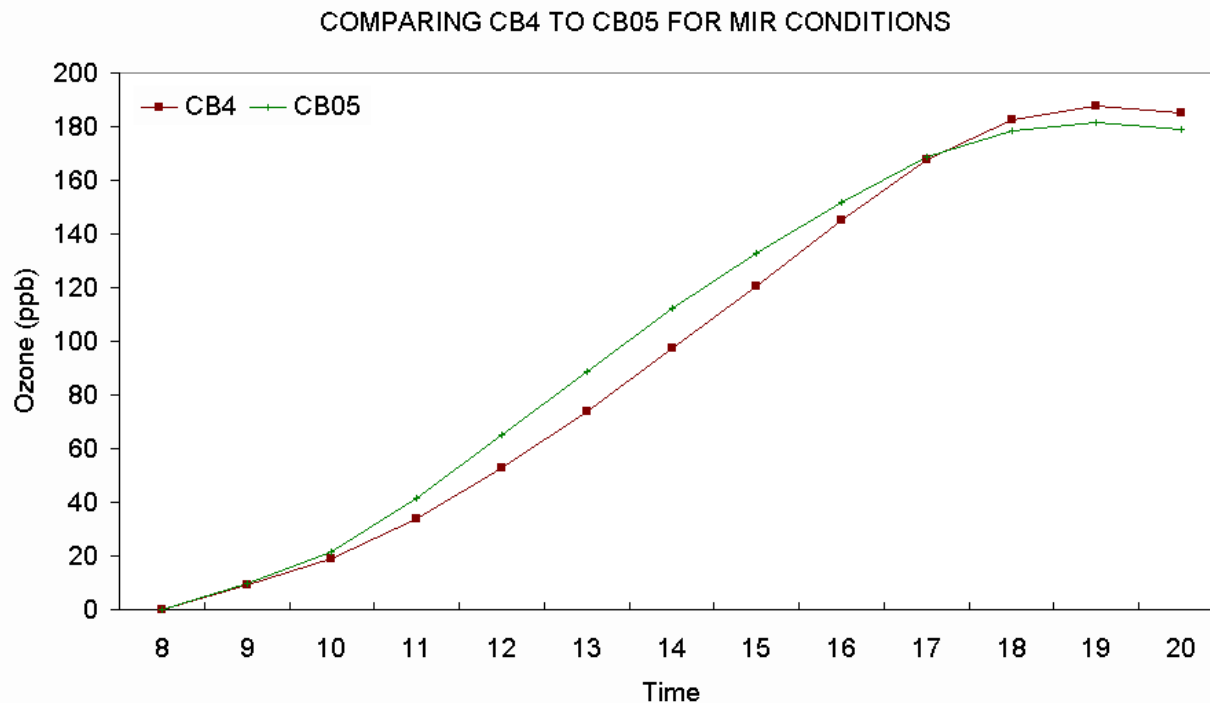

**Figure 3-1.** Comparison of CB4 and CB05 ozone predictions for urban MIR conditions.

CB05 forms ozone more rapidly than CB4 for the MIR condition compared in Figure 3-1, but ultimately CB4 and CB05 form the same amount of ozone. The faster ozone formation rate in CB05 results from including ALDX (higher aldehydes) and IOLE (internal olefins) in the mechanism that boost radical production in the morning. ALDX boosts radical production because higher aldehydes produce more radicals than acetaldehyde (i.e., have a higher quantum yield for radicals) when they photolyse. IOLE boosts radical production directly via reaction products and indirectly because ALDX is a product of IOLE degradation.

The formation of nitric acid and hydrogen peroxide by CB4 and CB05 is compared in Figures 3-2 and 3-3 for the MIR condition. Nitric acid formation is similar, but hydrogen peroxide production is slower in CB05. However, note that very little hydrogen peroxide is formed by either CB05 or CB4 at MIR conditions. Comparing hydrogen peroxide is more meaningful for MOR than MIR conditions. CB05 and CB4 also were compared under maximum ozone formation (MOIR) box model conditions (Figures 3-4 to 3-6). The VOC compositions for the MOR simulations were the same as for the MIR simulations (Table 3-1). The MOIR condition differs from the MIR condition in having lower NO<sub>x</sub> levels, resulting in higher ozone. The MOIR VOC/NO<sub>x</sub> ratio was set for CB4 and not re-adjusted for CB05, so the CB05 result is probably not exactly at the MOIR condition. CB05 produced slightly lower final ozone and nitric acid than CB4, but slightly higher hydrogen peroxide. CB05 had more rapid initial production of ozone, nitric acid and hydrogen peroxide than CB4 due to the ALOX and IOLE changes to CB05.

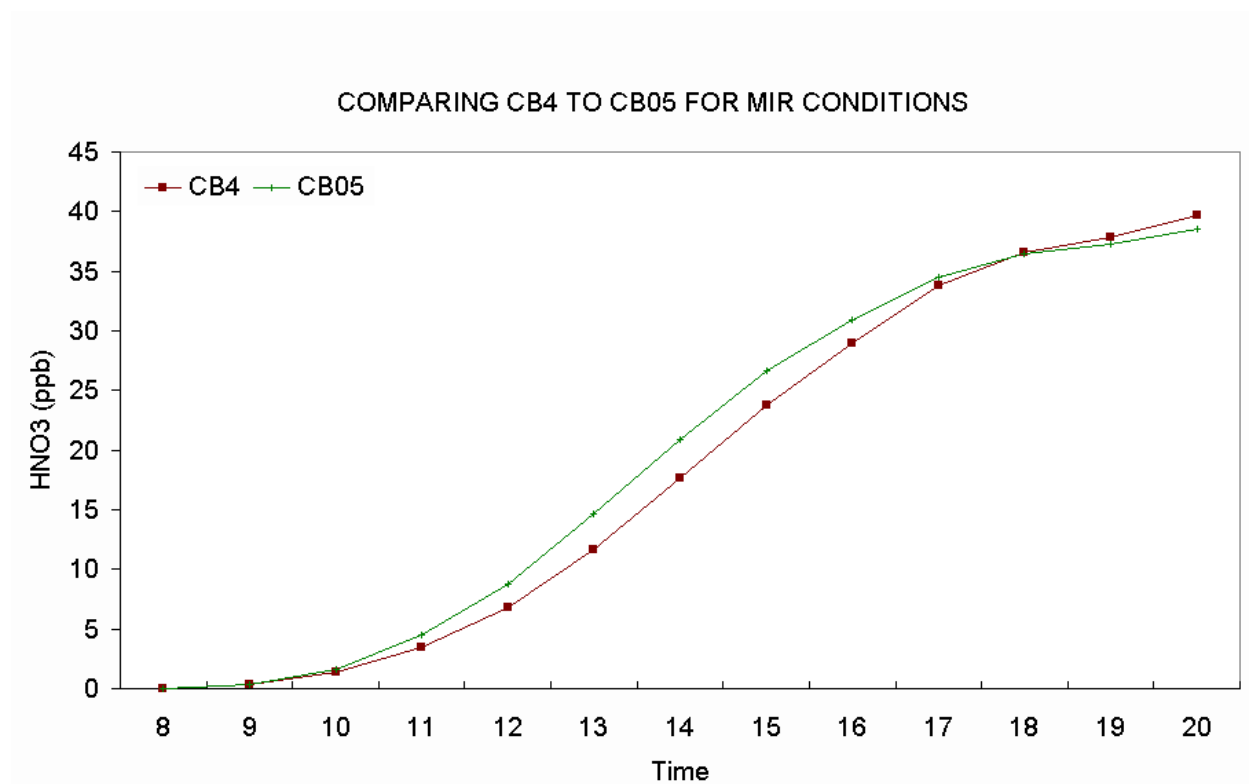

**Figure 3-2.** Comparison of CB4 and CB05 HNO<sub>3</sub> predictions for urban MIR conditions.

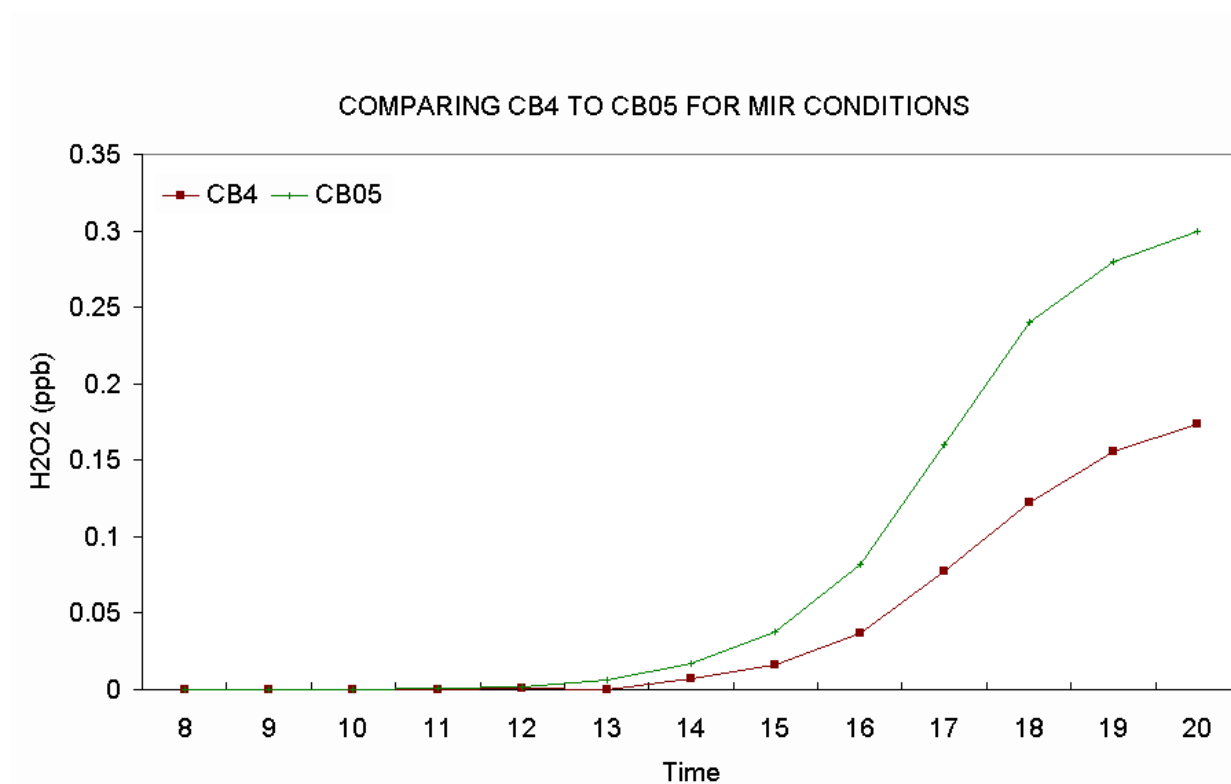

**Figure 3-3.** Comparison of CB4 and CB05 H<sub>2</sub>O<sub>2</sub> predictions for urban MIR conditions.

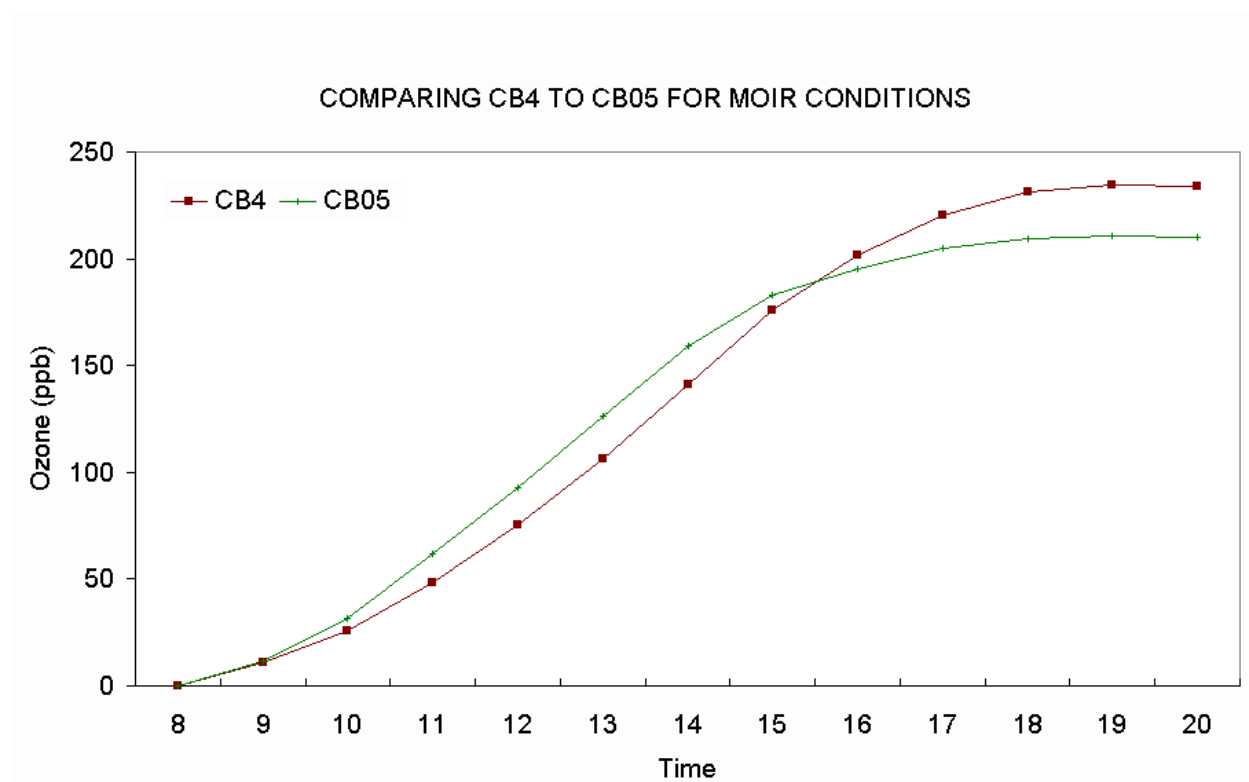

**Figure 3-4.** Comparison of CB4 and CB05 ozone predictions for urban MOIR conditions.

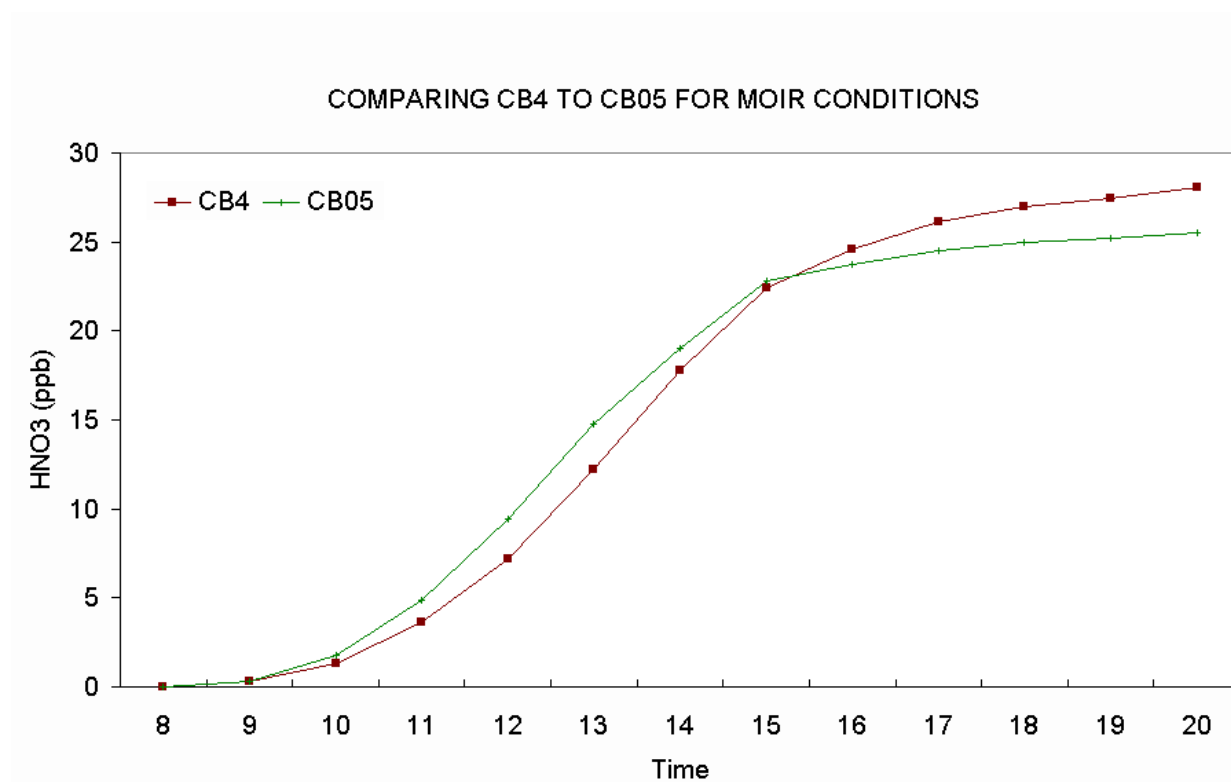

**Figure 3-5.** Comparison of CB4 and CB05 HNO<sub>3</sub> predictions for urban MOIR conditions.

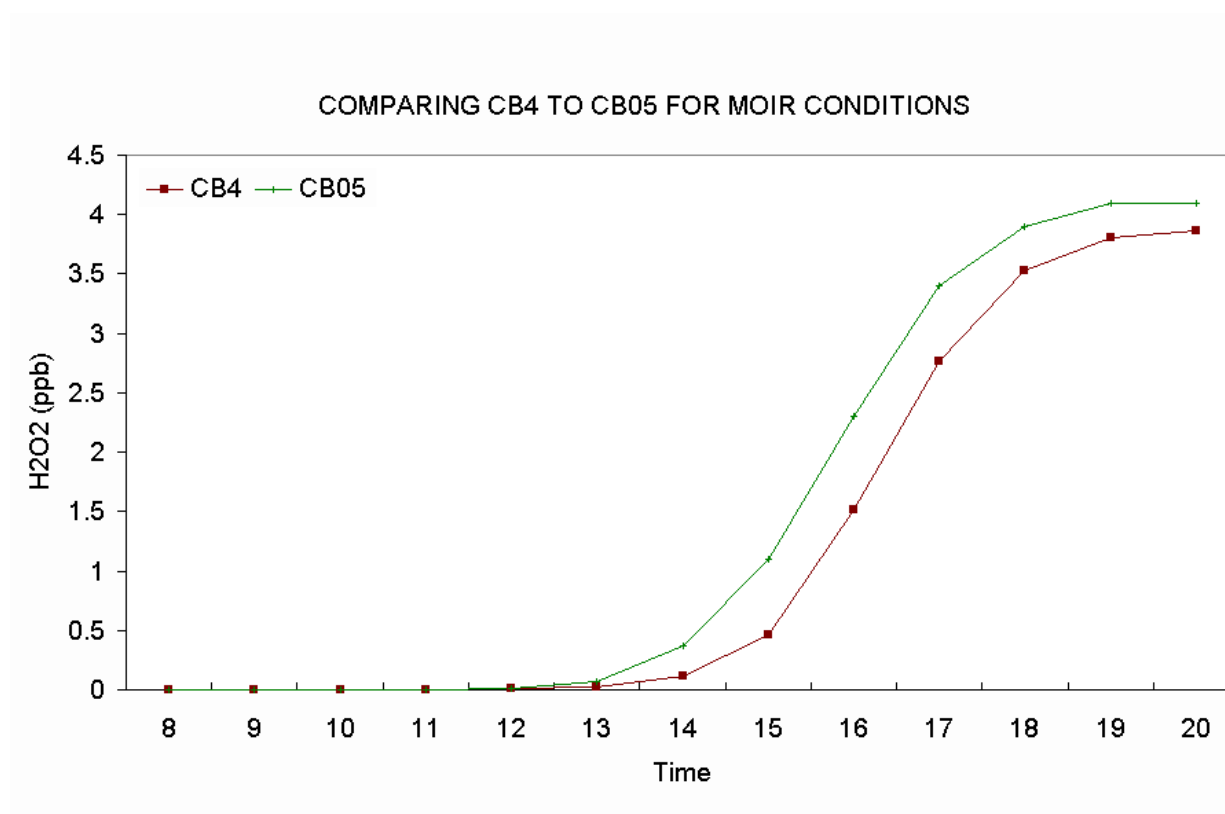

**Figure 3-6.** Comparison of CB4 and CB05 H<sub>2</sub>O<sub>2</sub> predictions for urban MOIR conditions.

## RATE CONSTANT COMPARISONS

The CB05 kinetic rate constant expressions were checked by independent calculations for three temperature/pressure conditions:

| Pressure | Temperature (K) |
|----------|-----------------|
| 1 atm    | 298             |
| 0.5 atm  | 298             |
| 1 atm    | 310             |

Both temperature and pressure were varied because some rate expressions depend upon both parameters. Rate constants were compared in units of ppm and minutes, as used within the CMAQ air quality model, such that units conversion from the molecular units (molecules per cm<sup>3</sup> and seconds) of the rate expressions also was tested. The rate constant comparison (Table 3-2) found very good agreement for all reactions. The largest difference of 1.2% was for the reaction of OH with CO that uses a unique rate expression.

**Table 3-2.** Comparison of CB05 thermal rate constants calculated by SmogReyes and EPA for three different temperature/pressure conditions (units are ppm and minutes).

| Reaction |                        | SmogReyes       |          |          | EPA      |          |          | Percent Difference <sup>1</sup> |      |      |     |
|----------|------------------------|-----------------|----------|----------|----------|----------|----------|---------------------------------|------|------|-----|
|          |                        | Temperature (K) | 298      | 298      | 310      | 298      | 298      | 310                             | 298  | 298  | 310 |
|          |                        | Pressure (Atm)  | 1        | 0.5      | 1        | 1        | 0.5      | 1                               | 1    | 0.5  | 1   |
| 1        | NO2 + hv <sup>2</sup>  |                 |          |          |          |          |          |                                 |      |      |     |
| 2        | O + O2 + M             | 2.22E-05        | 5.55E-06 | 1.87E-05 | 2.22E-05 | 5.55E-06 | 1.87E-05 | 0.0%                            | 0.0% | 0.2% |     |
| 3        | O3 + NO                | 2.89E+01        | 1.44E+01 | 3.38E+01 | 2.89E+01 | 1.44E+01 | 3.37E+01 | 0.0%                            | 0.3% | 0.2% |     |
| 4        | O + NO2                | 1.51E+04        | 7.54E+03 | 1.42E+04 | 1.51E+04 | 7.57E+03 | 1.42E+04 | 0.2%                            | 0.4% | 0.1% |     |
| 5        | O + NO2                | 4.85E+03        | 1.50E+03 | 4.30E+03 | 4.85E+03 | 1.50E+03 | 4.30E+03 | 0.1%                            | 0.0% | 0.1% |     |
| 6        | O + NO                 | 2.46E+03        | 6.74E+02 | 2.18E+03 | 2.46E+03 | 6.74E+02 | 2.18E+03 | 0.0%                            | 0.0% | 0.2% |     |
| 7        | NO2 + O3               | 4.76E-02        | 2.38E-02 | 6.30E-02 | 4.77E-02 | 2.38E-02 | 6.30E-02 | 0.2%                            | 0.0% | 0.1% |     |
| 8        | O3 + hv <sup>2</sup>   |                 |          |          |          |          |          |                                 |      |      |     |
| 9        | O3 + hv <sup>2</sup>   |                 |          |          |          |          |          |                                 |      |      |     |
| 10       | O1D + M                | 4.37E+04        | 2.19E+04 | 4.15E+04 | 4.37E+04 | 2.19E+04 | 4.15E+04 | 0.0%                            | 0.2% | 0.1% |     |
| 11       | O1D + H2O              | 3.25E+05        | 1.63E+05 | 3.12E+05 | 3.25E+05 | 1.63E+05 | 3.13E+05 | 0.0%                            | 0.3% | 0.2% |     |
| 12       | O3 + OH                | 1.07E+02        | 5.36E+01 | 1.16E+02 | 1.07E+02 | 5.36E+01 | 1.16E+02 | 0.2%                            | 0.0% | 0.2% |     |
| 13       | O3 + HO2               | 2.85E+00        | 1.43E+00 | 2.92E+00 | 2.85E+00 | 1.43E+00 | 2.92E+00 | 0.1%                            | 0.2% | 0.0% |     |
| 14       | NO3 + hv <sup>2</sup>  |                 |          |          |          |          |          |                                 |      |      |     |
| 15       | NO3 + hv <sup>2</sup>  |                 |          |          |          |          |          |                                 |      |      |     |
| 16       | NO3 + NO               | 3.92E+04        | 1.96E+04 | 3.69E+04 | 3.92E+04 | 1.96E+04 | 3.69E+04 | 0.1%                            | 0.1% | 0.1% |     |
| 17       | NO3 + NO2              | 9.70E-01        | 4.85E-01 | 1.10E+00 | 9.70E-01 | 4.85E-01 | 1.10E+00 | 0.0%                            | 0.0% | 0.2% |     |
| 18       | NO3 + NO2              | 1.74E+03        | 8.08E+02 | 1.60E+03 | 1.74E+03 | 8.08E+02 | 1.60E+03 | 0.1%                            | 0.0% | 0.1% |     |
| 19       | N2O5 + H2O             | 3.70E-07        | 1.85E-07 | 3.56E-07 | 3.69E-07 | 1.85E-07 | 3.55E-07 | 0.1%                            | 0.1% | 0.2% |     |
| 20       | N2O5 + H2O + H2O       | 6.55E-11        | 1.64E-11 | 6.06E-11 | 6.55E-11 | 1.64E-11 | 6.05E-11 | 0.0%                            | 0.1% | 0.1% |     |
| 21       | N2O5                   | 3.17E+00        | 2.85E+00 | 1.31E+01 | 3.17E+00 | 2.85E+00 | 1.31E+01 | 0.1%                            | 0.1% | 0.1% |     |
| 22       | NO + NO + O2           | 7.11E-10        | 1.78E-10 | 6.13E-10 | 7.11E-10 | 1.78E-10 | 6.14E-10 | 0.0%                            | 0.1% | 0.1% |     |
| 23       | NO + NO2 + H2O         | 1.82E-11        | 4.55E-12 | 1.68E-11 | 1.82E-11 | 4.55E-12 | 1.68E-11 | 0.0%                            | 0.0% | 0.1% |     |
| 24       | NO + OH                | 1.09E+04        | 3.60E+03 | 9.69E+03 | 1.09E+04 | 3.60E+03 | 9.69E+03 | 0.4%                            | 0.1% | 0.1% |     |
| 25       | HONO + hv <sup>2</sup> |                 |          |          |          |          |          |                                 |      |      |     |
| 26       | OH + HONO              | 7.19E+03        | 3.59E+03 | 7.27E+03 | 7.19E+03 | 3.59E+03 | 7.27E+03 | 0.0%                            | 0.1% | 0.0% |     |
| 27       | HONO + HONO            | 1.48E-05        | 7.39E-06 | 1.42E-05 | 1.48E-05 | 7.39E-06 | 1.42E-05 | 0.1%                            | 0.0% | 0.1% |     |
| 28       | NO2 + OH               | 1.55E+04        | 5.56E+03 | 1.38E+04 | 1.55E+04 | 5.56E+03 | 1.38E+04 | 0.3%                            | 0.1% | 0.2% |     |
| 29       | OH + HNO3              | 2.28E+02        | 1.13E+02 | 1.95E+02 | 2.28E+02 | 1.13E+02 | 1.95E+02 | 0.0%                            | 0.1% | 0.1% |     |
| 30       | HO2 + NO               | 1.20E+04        | 5.99E+03 | 1.11E+04 | 1.20E+04 | 5.98E+03 | 1.11E+04 | 0.2%                            | 0.1% | 0.4% |     |
| 31       | HO2 + NO2              | 2.05E+03        | 7.10E+02 | 1.81E+03 | 2.05E+03 | 7.10E+02 | 1.81E+03 | 0.2%                            | 0.0% | 0.1% |     |
| 32       | PNA                    | 4.99E+00        | 3.50E+00 | 2.02E+01 | 4.99E+00 | 3.50E+00 | 2.02E+01 | 0.1%                            | 0.0% | 0.1% |     |
| 33       | OH + PNA               | 6.88E+03        | 3.44E+03 | 6.29E+03 | 6.88E+03 | 3.44E+03 | 6.29E+03 | 0.0%                            | 0.0% | 0.0% |     |
| 34       | HO2 + HO2              | 4.32E+03        | 1.72E+03 | 3.70E+03 | 4.32E+03 | 1.72E+03 | 3.70E+03 | 0.0%                            | 0.2% | 0.1% |     |
| 35       | HO2 + HO2 + H2O        | 2.39E-01        | 4.76E-02 | 1.48E-01 | 2.39E-01 | 4.76E-02 | 1.48E-01 | 0.2%                            | 0.1% | 0.2% |     |
| 36       | H2O2 + hv <sup>2</sup> |                 |          |          |          |          |          |                                 |      |      |     |
| 37       | OH + H2O2              | 2.51E+03        | 1.25E+03 | 2.46E+03 | 2.51E+03 | 1.25E+03 | 2.46E+03 | 0.2%                            | 0.2% | 0.0% |     |
| 38       | O1D + H2               | 1.63E+05        | 8.13E+04 | 1.56E+05 | 1.63E+05 | 8.13E+04 | 1.56E+05 | 0.3%                            | 0.0% | 0.2% |     |
| 39       | OH + H2                | 9.89E+00        | 4.95E+00 | 1.23E+01 | 9.89E+00 | 4.95E+00 | 1.23E+01 | 0.0%                            | 0.1% | 0.2% |     |
| 40       | OH + O                 | 4.86E+04        | 2.43E+04 | 4.60E+04 | 4.86E+04 | 2.43E+04 | 4.60E+04 | 0.1%                            | 0.1% | 0.1% |     |
| 41       | OH + OH                | 2.77E+03        | 1.39E+03 | 2.75E+03 | 2.77E+03 | 1.39E+03 | 2.75E+03 | 0.2%                            | 0.2% | 0.0% |     |
| 42       | OH + OH                | 9.30E+03        | 3.14E+03 | 8.57E+03 | 9.30E+03 | 3.14E+03 | 8.57E+03 | 0.0%                            | 0.1% | 0.0% |     |
| 43       | OH + HO2               | 1.64E+05        | 8.20E+04 | 1.53E+05 | 1.64E+05 | 8.21E+04 | 1.53E+05 | 0.0%                            | 0.1% | 0.1% |     |
| 44       | HO2 + O                | 8.68E+04        | 4.34E+04 | 8.13E+04 | 8.67E+04 | 4.34E+04 | 8.12E+04 | 0.1%                            | 0.0% | 0.1% |     |
| 45       | H2O2 + O               | 2.51E+00        | 1.26E+00 | 3.14E+00 | 2.52E+00 | 1.26E+00 | 3.14E+00 | 0.3%                            | 0.3% | 0.0% |     |
| 46       | NO3 + O                | 1.48E+04        | 7.39E+03 | 1.42E+04 | 1.48E+04 | 7.39E+03 | 1.42E+04 | 0.1%                            | 0.0% | 0.1% |     |
| 47       | NO3 + OH               | 3.25E+04        | 1.63E+04 | 3.13E+04 | 3.25E+04 | 1.63E+04 | 3.13E+04 | 0.0%                            | 0.3% | 0.1% |     |

| Reaction |                        | SmogReyes |          |          | EPA      |          |          | Percent Difference <sup>1</sup> |      |      |
|----------|------------------------|-----------|----------|----------|----------|----------|----------|---------------------------------|------|------|
|          | Temperature (K)        | 298       | 298      | 310      | 298      | 298      | 310      | 298                             | 298  | 310  |
|          | Pressure (Atm)         | 1         | 0.5      | 1        | 1        | 0.5      | 1        | 1                               | 0.5  | 1    |
| 48       | NO3 + HO2              | 5.17E+03  | 2.59E+03 | 4.97E+03 | 5.17E+03 | 2.59E+03 | 4.97E+03 | 0.1%                            | 0.1% | 0.0% |
| 49       | NO3 + O3               | 1.48E-02  | 7.39E-03 | 1.42E-02 | 1.48E-02 | 7.39E-03 | 1.42E-02 | 0.1%                            | 0.0% | 0.1% |
| 50       | NO3 + NO3              | 3.38E-01  | 1.69E-01 | 4.47E-01 | 3.38E-01 | 1.69E-01 | 4.46E-01 | 0.1%                            | 0.1% | 0.2% |
| 51       | PNA + hv <sup>2</sup>  |           |          |          |          |          |          |                                 |      |      |
| 52       | HNO3 + hv <sup>2</sup> |           |          |          |          |          |          |                                 |      |      |
| 53       | N2O5 + hv <sup>2</sup> |           |          |          |          |          |          |                                 |      |      |
| 54       | XO2 + NO               | 1.31E+04  | 6.54E+03 | 1.20E+04 | 1.31E+04 | 6.54E+03 | 1.20E+04 | 0.2%                            | 0.0% | 0.1% |
| 55       | XO2N + NO              | 1.31E+04  | 6.54E+03 | 1.20E+04 | 1.31E+04 | 6.54E+03 | 1.20E+04 | 0.2%                            | 0.0% | 0.1% |
| 56       | XO2 + HO2              | 1.16E+04  | 5.81E+03 | 1.02E+04 | 1.16E+04 | 5.81E+03 | 1.02E+04 | 0.1%                            | 0.1% | 0.2% |
| 57       | XO2N + HO2             | 1.16E+04  | 5.81E+03 | 1.02E+04 | 1.16E+04 | 5.81E+03 | 1.02E+04 | 0.1%                            | 0.1% | 0.2% |
| 58       | XO2 + XO2              | 1.01E+02  | 5.03E+01 | 9.66E+01 | 1.00E+02 | 5.02E+01 | 9.66E+01 | 0.5%                            | 0.1% | 0.0% |
| 59       | XO2N + XO2N            | 1.01E+02  | 5.03E+01 | 9.66E+01 | 1.00E+02 | 5.02E+01 | 9.66E+01 | 0.5%                            | 0.1% | 0.0% |
| 60       | XO2 + XO2N             | 1.01E+02  | 5.03E+01 | 9.66E+01 | 1.00E+02 | 5.02E+01 | 9.66E+01 | 0.5%                            | 0.1% | 0.0% |
| 61       | NTR + OH               | 2.60E+02  | 1.30E+02 | 2.62E+02 | 2.61E+02 | 1.30E+02 | 2.62E+02 | 0.2%                            | 0.2% | 0.1% |
| 62       | NTR + hv <sup>2</sup>  |           |          |          |          |          |          |                                 |      |      |
| 63       | ROOH + OH              | 8.42E+03  | 4.21E+03 | 7.89E+03 | 8.42E+03 | 4.21E+03 | 7.89E+03 | 0.0%                            | 0.0% | 0.1% |
| 64       | ROOH + hv <sup>2</sup> |           |          |          |          |          |          |                                 |      |      |
| 65       | OH + CO                | 3.55E+02  | 1.44E+02 | 3.41E+02 | 3.56E+02 | 1.44E+02 | 3.37E+02 | 0.4%                            | 0.1% | 1.2% |
| 66       | OH + CH4               | 9.38E+00  | 4.69E+00 | 1.14E+01 | 9.37E+00 | 4.69E+00 | 1.13E+01 | 0.1%                            | 0.0% | 0.5% |
| 67       | MEO2 + NO              | 1.13E+04  | 5.66E+03 | 1.05E+04 | 1.13E+04 | 5.66E+03 | 1.05E+04 | 0.2%                            | 0.0% | 0.3% |
| 68       | MEO2 + HO2             | 7.51E+03  | 3.75E+03 | 6.55E+03 | 7.51E+03 | 3.75E+03 | 6.55E+03 | 0.0%                            | 0.1% | 0.1% |
| 69       | MEO2 + MEO2            | 5.20E+02  | 2.60E+02 | 4.75E+02 | 5.20E+02 | 2.60E+02 | 4.75E+02 | 0.1%                            | 0.1% | 0.0% |
| 70       | MEPX + OH              | 1.10E+04  | 5.49E+03 | 1.03E+04 | 1.10E+04 | 5.49E+03 | 1.03E+04 | 0.1%                            | 0.1% | 0.0% |
| 71       | MEPX + hv <sup>2</sup> |           |          |          |          |          |          |                                 |      |      |
| 72       | MEOH + OH              | 1.35E+03  | 6.74E+02 | 1.40E+03 | 1.35E+03 | 6.74E+02 | 1.40E+03 | 0.2%                            | 0.1% | 0.2% |
| 73       | FORM + OH              | 1.33E+04  | 6.65E+03 | 1.28E+04 | 1.33E+04 | 6.65E+03 | 1.28E+04 | 0.0%                            | 0.0% | 0.1% |
| 74       | FORM + hv <sup>2</sup> |           |          |          |          |          |          |                                 |      |      |
| 75       | FORM + hv <sup>2</sup> |           |          |          |          |          |          |                                 |      |      |
| 76       | FORM + O               | 2.34E+02  | 1.17E+02 | 2.77E+02 | 2.34E+02 | 1.17E+02 | 2.77E+02 | 0.0%                            | 0.0% | 0.0% |
| 77       | FORM + NO3             | 8.57E-01  | 4.29E-01 | 8.24E-01 | 8.57E-01 | 4.29E-01 | 8.24E-01 | 0.0%                            | 0.1% | 0.0% |
| 78       | FORM + HO2             | 1.17E+02  | 5.84E+01 | 1.03E+02 | 1.17E+02 | 5.84E+01 | 1.03E+02 | 0.2%                            | 0.0% | 0.5% |
| 79       | HCO3                   | 9.05E+03  | 9.05E+03 | 2.25E+04 | 9.05E+03 | 9.05E+03 | 2.25E+04 | 0.0%                            | 0.0% | 0.1% |
| 80       | HCO3 + NO              | 8.28E+03  | 4.14E+03 | 7.96E+03 | 8.28E+03 | 4.14E+03 | 7.96E+03 | 0.0%                            | 0.0% | 0.0% |
| 81       | HCO3 + HO2             | 1.86E+04  | 9.30E+03 | 1.33E+04 | 1.86E+04 | 9.30E+03 | 1.33E+04 | 0.0%                            | 0.0% | 0.2% |
| 82       | FACD + OH              | 5.91E+02  | 2.96E+02 | 5.68E+02 | 5.91E+02 | 2.96E+02 | 5.68E+02 | 0.0%                            | 0.1% | 0.0% |
| 83       | ALD2 + O               | 6.63E+02  | 3.32E+02 | 7.35E+02 | 6.63E+02 | 3.32E+02 | 7.36E+02 | 0.1%                            | 0.1% | 0.1% |
| 84       | ALD2 + OH              | 2.05E+04  | 1.02E+04 | 1.90E+04 | 2.05E+04 | 1.02E+04 | 1.90E+04 | 0.1%                            | 0.4% | 0.0% |
| 85       | ALD2 + NO3             | 3.52E+00  | 1.76E+00 | 4.33E+00 | 3.52E+00 | 1.76E+00 | 4.33E+00 | 0.1%                            | 0.1% | 0.0% |
| 86       | ALD2 + hv <sup>2</sup> |           |          |          |          |          |          |                                 |      |      |
| 87       | C2O3 + NO              | 2.96E+04  | 1.48E+04 | 2.75E+04 | 2.96E+04 | 1.48E+04 | 2.75E+04 | 0.1%                            | 0.1% | 0.1% |
| 88       | C2O3 + NO2             | 1.55E+04  | 7.50E+03 | 1.42E+04 | 1.55E+04 | 7.49E+03 | 1.42E+04 | 0.1%                            | 0.1% | 0.0% |
| 89       | PAN                    | 1.99E-02  | 1.93E-02 | 1.19E-01 | 1.99E-02 | 1.93E-02 | 1.19E-01 | 0.2%                            | 0.1% | 0.4% |
| 90       | PAN + hv <sup>2</sup>  |           |          |          |          |          |          |                                 |      |      |
| 91       | C2O3 + HO2             | 2.08E+04  | 1.04E+04 | 1.75E+04 | 2.08E+04 | 1.04E+04 | 1.75E+04 | 0.2%                            | 0.2% | 0.0% |
| 92       | C2O3 + MEO2            | 1.58E+04  | 7.91E+03 | 1.43E+04 | 1.58E+04 | 7.91E+03 | 1.43E+04 | 0.2%                            | 0.1% | 0.3% |
| 93       | C2O3 + XO2             | 2.36E+04  | 1.18E+04 | 1.97E+04 | 2.36E+04 | 1.18E+04 | 1.97E+04 | 0.1%                            | 0.1% | 0.1% |
| 94       | C2O3 + C2O3            | 2.30E+04  | 1.15E+04 | 2.07E+04 | 2.29E+04 | 1.15E+04 | 2.07E+04 | 0.2%                            | 0.2% | 0.1% |
| 95       | PACD + OH              | 1.16E+03  | 5.78E+02 | 1.08E+03 | 1.16E+03 | 5.78E+02 | 1.08E+03 | 0.3%                            | 0.1% | 0.3% |
| 96       | PACD + hv <sup>2</sup> |           |          |          |          |          |          |                                 |      |      |

| Reaction |                        | SmogReyes |          |          | EPA      |          |          | Percent Difference <sup>1</sup> |      |      |
|----------|------------------------|-----------|----------|----------|----------|----------|----------|---------------------------------|------|------|
|          | Temperature (K)        | 298       | 298      | 310      | 298      | 298      | 310      | 298                             | 298  | 310  |
|          | Pressure (Atm)         | 1         | 0.5      | 1        | 1        | 0.5      | 1        | 1                               | 0.5  | 1    |
| 97       | AACD + OH              | 1.16E+03  | 5.78E+02 | 1.08E+03 | 1.16E+03 | 5.78E+02 | 1.08E+03 | 0.3%                            | 0.1% | 0.3% |
| 98       | ALDX + O               | 1.04E+03  | 5.18E+02 | 1.12E+03 | 1.04E+03 | 5.18E+02 | 1.12E+03 | 0.3%                            | 0.1% | 0.1% |
| 99       | ALDX + OH              | 2.93E+04  | 1.47E+04 | 2.67E+04 | 2.93E+04 | 1.47E+04 | 2.68E+04 | 0.1%                            | 0.2% | 0.3% |
| 100      | ALDX + NO3             | 9.61E+00  | 4.80E+00 | 9.24E+00 | 9.61E+00 | 4.80E+00 | 9.23E+00 | 0.0%                            | 0.1% | 0.1% |
| 101      | ALDX + hv <sup>2</sup> |           |          |          |          |          |          |                                 |      |      |
| 102      | CXO3 + NO              | 3.10E+04  | 1.55E+04 | 2.85E+04 | 3.10E+04 | 1.55E+04 | 2.85E+04 | 0.0%                            | 0.0% | 0.0% |
| 103      | CXO3 + NO2             | 1.55E+04  | 7.50E+03 | 1.42E+04 | 1.55E+04 | 7.49E+03 | 1.42E+04 | 0.1%                            | 0.1% | 0.0% |
| 104      | PANX                   | 1.99E-02  | 1.93E-02 | 1.19E-01 | 1.99E-02 | 1.93E-02 | 1.19E-01 | 0.2%                            | 0.1% | 0.4% |
| 105      | PANX + hv <sup>2</sup> |           |          |          |          |          |          |                                 |      |      |
| 106      | PANX + OH              | 4.43E+02  | 2.22E+02 | 4.26E+02 | 4.43E+02 | 2.22E+02 | 4.26E+02 | 0.1%                            | 0.1% | 0.0% |
| 107      | CXO3 + HO2             | 2.08E+04  | 1.04E+04 | 1.75E+04 | 2.08E+04 | 1.04E+04 | 1.75E+04 | 0.2%                            | 0.2% | 0.0% |
| 108      | CXO3 + MEO2            | 1.58E+04  | 7.91E+03 | 1.43E+04 | 1.58E+04 | 7.91E+03 | 1.43E+04 | 0.2%                            | 0.1% | 0.3% |
| 109      | CXO3 + XO2             | 2.36E+04  | 1.18E+04 | 1.97E+04 | 2.36E+04 | 1.18E+04 | 1.97E+04 | 0.2%                            | 0.2% | 0.2% |
| 110      | CXO3 + CXO3            | 2.30E+04  | 1.15E+04 | 2.07E+04 | 2.29E+04 | 1.15E+04 | 2.07E+04 | 0.2%                            | 0.2% | 0.1% |
| 111      | CXO3 + C2O3            | 2.30E+04  | 1.15E+04 | 2.07E+04 | 2.29E+04 | 1.15E+04 | 2.07E+04 | 0.2%                            | 0.2% | 0.1% |
| 112      | PAR + OH               | 1.20E+03  | 5.99E+02 | 1.15E+03 | 1.20E+03 | 5.99E+02 | 1.15E+03 | 0.2%                            | 0.1% | 0.1% |
| 113      | ROR                    | 1.32E+05  | 1.32E+05 | 3.72E+05 | 1.32E+05 | 1.32E+05 | 3.72E+05 | 0.3%                            | 0.3% | 0.0% |
| 114      | ROR                    | 9.60E+04  | 9.60E+04 | 9.60E+04 | 9.60E+04 | 9.60E+04 | 9.60E+04 | 0.0%                            | 0.0% | 0.0% |
| 115      | ROR + NO2              | 2.22E+04  | 1.11E+04 | 2.13E+04 | 2.22E+04 | 1.11E+04 | 2.13E+04 | 0.1%                            | 0.1% | 0.1% |
| 116      | O + OLE                | 5.78E+03  | 2.89E+03 | 5.76E+03 | 5.78E+03 | 2.89E+03 | 5.76E+03 | 0.1%                            | 0.1% | 0.0% |
| 117      | OH + OLE               | 4.73E+04  | 2.36E+04 | 4.55E+04 | 4.73E+04 | 2.36E+04 | 4.55E+04 | 0.0%                            | 0.2% | 0.1% |
| 118      | O3 + OLE               | 1.63E-02  | 8.13E-03 | 2.01E-02 | 1.64E-02 | 8.18E-03 | 2.01E-02 | 0.9%                            | 0.6% | 0.2% |
| 119      | NO3 + OLE              | 7.36E-01  | 3.68E-01 | 9.37E-01 | 7.36E-01 | 3.68E-01 | 9.37E-01 | 0.0%                            | 0.0% | 0.0% |
| 120      | O + ETH                | 1.08E+03  | 5.39E+02 | 1.15E+03 | 1.08E+03 | 5.39E+02 | 1.15E+03 | 0.2%                            | 0.0% | 0.1% |
| 121      | OH + ETH               | 1.20E+04  | 5.90E+03 | 1.16E+04 | 1.20E+04 | 5.90E+03 | 1.16E+04 | 0.4%                            | 0.1% | 0.3% |
| 122      | O3 + ETH               | 2.61E-03  | 1.30E-03 | 3.53E-03 | 2.61E-03 | 1.30E-03 | 3.52E-03 | 0.2%                            | 0.2% | 0.3% |
| 123      | NO3 + ETH              | 3.10E-01  | 1.55E-01 | 4.33E-01 | 3.10E-01 | 1.55E-01 | 4.33E-01 | 0.1%                            | 0.1% | 0.0% |
| 124      | IOLE + O               | 3.40E+04  | 1.70E+04 | 3.27E+04 | 3.40E+04 | 1.70E+04 | 3.27E+04 | 0.0%                            | 0.0% | 0.0% |
| 125      | IOLE + OH              | 9.36E+04  | 4.68E+04 | 8.38E+04 | 9.36E+04 | 4.68E+04 | 8.38E+04 | 0.0%                            | 0.0% | 0.0% |
| 126      | IOLE + O3              | 3.10E-01  | 1.55E-01 | 3.44E-01 | 3.10E-01 | 1.55E-01 | 3.43E-01 | 0.1%                            | 0.1% | 0.2% |
| 127      | IOLE + NO3             | 5.73E+02  | 2.87E+02 | 5.71E+02 | 5.73E+02 | 2.87E+02 | 5.71E+02 | 0.1%                            | 0.1% | 0.1% |
| 128      | TOL + OH               | 8.76E+03  | 4.38E+03 | 8.04E+03 | 8.76E+03 | 4.38E+03 | 8.04E+03 | 0.0%                            | 0.0% | 0.0% |
| 129      | TO2 + NO               | 1.20E+04  | 5.99E+03 | 1.15E+04 | 1.20E+04 | 5.99E+03 | 1.15E+04 | 0.2%                            | 0.1% | 0.3% |
| 130      | TO2                    | 2.52E+02  | 2.52E+02 | 2.52E+02 | 2.52E+02 | 2.52E+02 | 2.52E+02 | 0.0%                            | 0.0% | 0.0% |
| 131      | OH + CRES              | 6.06E+04  | 3.03E+04 | 5.83E+04 | 6.06E+04 | 3.03E+04 | 5.82E+04 | 0.0%                            | 0.0% | 0.1% |
| 132      | CRES + NO3             | 3.25E+04  | 1.63E+04 | 3.12E+04 | 3.25E+04 | 1.63E+04 | 3.13E+04 | 0.0%                            | 0.3% | 0.2% |
| 133      | CRO + NO2              | 2.07E+04  | 1.03E+04 | 1.99E+04 | 2.07E+04 | 1.03E+04 | 1.99E+04 | 0.0%                            | 0.4% | 0.0% |
| 134      | CRO + HO2              | 8.13E+03  | 4.06E+03 | 7.82E+03 | 8.13E+03 | 4.06E+03 | 7.81E+03 | 0.0%                            | 0.1% | 0.1% |
| 135      | OPEN + hv <sup>2</sup> |           |          |          |          |          |          |                                 |      |      |
| 136      | OPEN + OH              | 4.43E+04  | 2.22E+04 | 4.26E+04 | 4.43E+04 | 2.22E+04 | 4.26E+04 | 0.1%                            | 0.1% | 0.0% |
| 137      | OPEN + O3              | 1.49E-02  | 7.45E-03 | 1.53E-02 | 1.49E-02 | 7.45E-03 | 1.53E-02 | 0.0%                            | 0.0% | 0.1% |
| 138      | OH + XYL               | 3.70E+04  | 1.85E+04 | 3.50E+04 | 3.71E+04 | 1.85E+04 | 3.51E+04 | 0.4%                            | 0.1% | 0.2% |
| 139      | OH + MGLY              | 2.66E+04  | 1.33E+04 | 2.56E+04 | 2.66E+04 | 1.33E+04 | 2.56E+04 | 0.0%                            | 0.0% | 0.1% |
| 140      | MGLY + hv <sup>2</sup> |           |          |          |          |          |          |                                 |      |      |
| 141      | O + ISOP               | 5.32E+04  | 2.66E+04 | 5.11E+04 | 5.32E+04 | 2.66E+04 | 5.11E+04 | 0.0%                            | 0.0% | 0.1% |
| 142      | OH + ISOP              | 1.47E+05  | 7.37E+04 | 1.34E+05 | 1.47E+05 | 7.37E+04 | 1.34E+05 | 0.3%                            | 0.0% | 0.0% |
| 143      | O3 + ISOP              | 1.90E-02  | 9.50E-03 | 2.34E-02 | 1.90E-02 | 9.50E-03 | 2.34E-02 | 0.0%                            | 0.0% | 0.1% |
| 144      | NO3 + ISOP             | 9.96E+02  | 4.98E+02 | 1.02E+03 | 9.96E+02 | 4.98E+02 | 1.01E+03 | 0.0%                            | 0.0% | 0.5% |
| 145      | OH + ISPD              | 4.97E+04  | 2.48E+04 | 4.77E+04 | 4.97E+04 | 2.48E+04 | 4.77E+04 | 0.1%                            | 0.1% | 0.1% |

| Reaction           |                        | SmogReyes |          |          | EPA      |          |          | Percent Difference <sup>1</sup> |      |      |
|--------------------|------------------------|-----------|----------|----------|----------|----------|----------|---------------------------------|------|------|
|                    | Temperature (K)        | 298       | 298      | 310      | 298      | 298      | 310      | 298                             | 298  | 310  |
|                    | Pressure (Atm)         | 1         | 0.5      | 1        | 1        | 0.5      | 1        | 1                               | 0.5  | 1    |
| 146                | O3 + ISPD              | 1.05E-02  | 5.25E-03 | 1.01E-02 | 1.05E-02 | 5.25E-03 | 1.01E-02 | 0.1%                            | 0.1% | 0.1% |
| 147                | NO3 + ISPD             | 1.48E+00  | 7.39E-01 | 1.42E+00 | 1.48E+00 | 7.39E-01 | 1.42E+00 | 0.1%                            | 0.0% | 0.1% |
| 148                | ISPD + hv <sup>2</sup> |           |          |          |          |          |          |                                 |      |      |
| 149                | TERP + O               | 5.32E+04  | 2.66E+04 | 5.11E+04 | 5.32E+04 | 2.66E+04 | 5.11E+04 | 0.0%                            | 0.0% | 0.1% |
| 150                | TERP + OH              | 1.00E+05  | 5.00E+04 | 9.07E+04 | 1.00E+05 | 5.00E+04 | 9.07E+04 | 0.0%                            | 0.0% | 0.0% |
| 151                | TERP + O3              | 1.13E-01  | 5.64E-02 | 1.21E-01 | 1.13E-01 | 5.64E-02 | 1.21E-01 | 0.2%                            | 0.0% | 0.1% |
| 152                | TERP + NO3             | 9.84E+03  | 4.92E+03 | 9.25E+03 | 9.84E+03 | 4.92E+03 | 9.24E+03 | 0.0%                            | 0.0% | 0.1% |
| 153                | SO2 + OH               | 1.31E+03  | 5.11E+02 | 1.20E+03 | 1.31E+03 | 5.11E+02 | 1.20E+03 | 0.3%                            | 0.0% | 0.3% |
| 154                | OH + ETOH              | 4.71E+03  | 2.36E+03 | 4.67E+03 | 4.71E+03 | 2.36E+03 | 4.67E+03 | 0.1%                            | 0.1% | 0.0% |
| 155                | OH + ETHA              | 3.55E+02  | 1.77E+02 | 3.92E+02 | 3.55E+02 | 1.77E+02 | 3.92E+02 | 0.1%                            | 0.2% | 0.0% |
| 156                | NO2 + ISOP             | 2.22E-04  | 1.11E-04 | 2.13E-04 | 2.22E-04 | 1.11E-04 | 2.13E-04 | 0.1%                            | 0.1% | 0.1% |
| Maximum Difference |                        |           |          |          |          |          |          | 0.9%                            | 0.6% | 1.2% |

## Table Notes

1. Differences are calculated as the absolute difference between SmogReyes and EPA values divided by the EPA value.
2. Photolysis reactions (with a reactant hv) are not compared.

## BOX MODEL COMPARISONS

Comparing the results of box model simulations checked the CMAQ implementation of the CB05 mechanism reactions together with photolysis data and rate constant data. SmogReyes implemented CB05 in the OZIPM box model and set up calculations for the three temperature and pressure conditions as were used for the rate constant comparison shown in Table 3-2. EPA set up a box model version of CMAQ to match as closely as possible the conditions of the OZIPM tests. There was generally good agreement between the concentrations predicted by the two box models suggesting that the mechanism implementation was correct in both models. Example comparisons for 298 K and 1 atmosphere are shown in Figure 3-7 (NO, NO<sub>2</sub> and O<sub>3</sub>) and Figure 3-8 (HONO and HO<sub>2</sub>). Figures 3-9 and 3-10 show similar comparisons at different temperatures and pressures. These comparisons confirm that CB05 is implemented correctly in the CMAQ model.

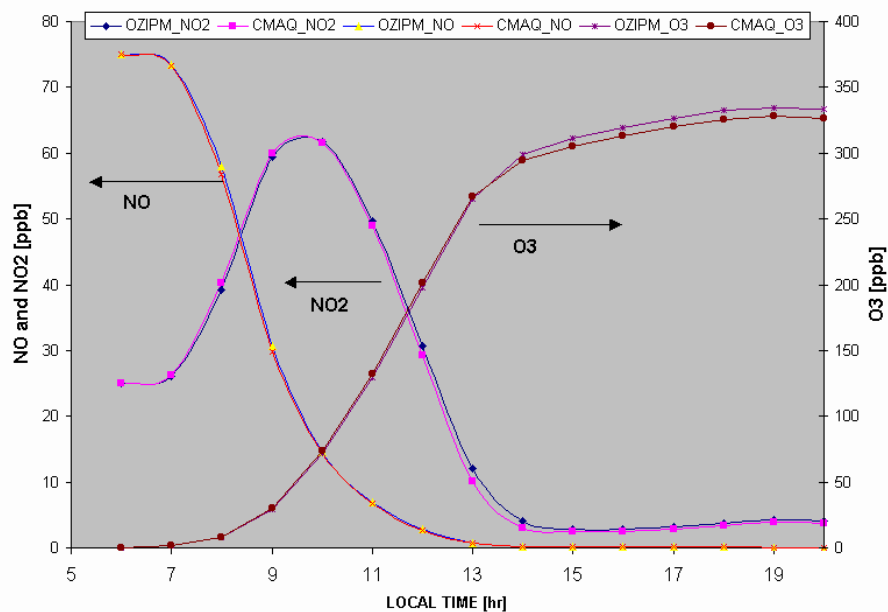

**Figure 3-7.** Comparison of results from the CMAQ and OZIPM box models for NO, NO<sub>2</sub> and O<sub>3</sub> at 298 K and 1 atmosphere.

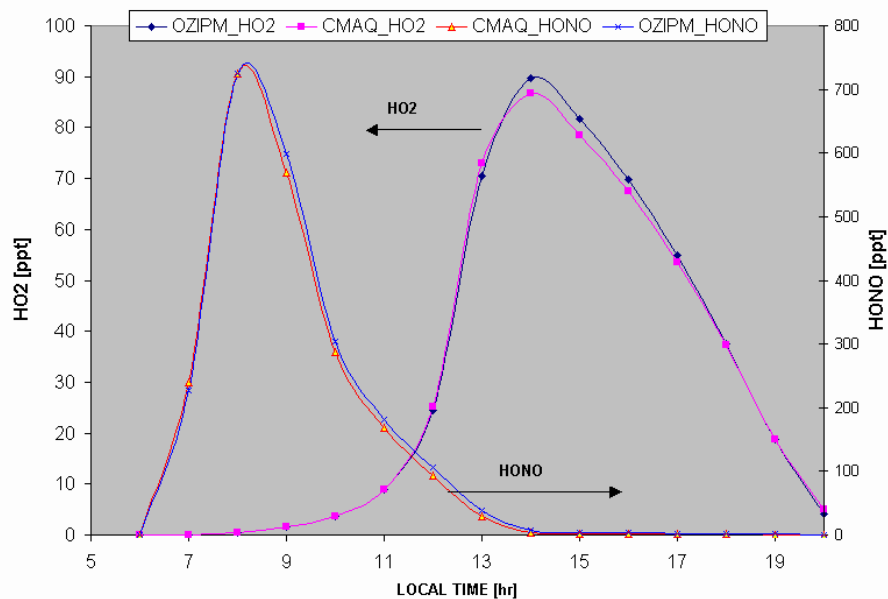

**Figure 3-8.** Comparison of results from the CMAQ and OZIPM box models for HONO and HO<sub>2</sub> at 298 K and 1 atmosphere.

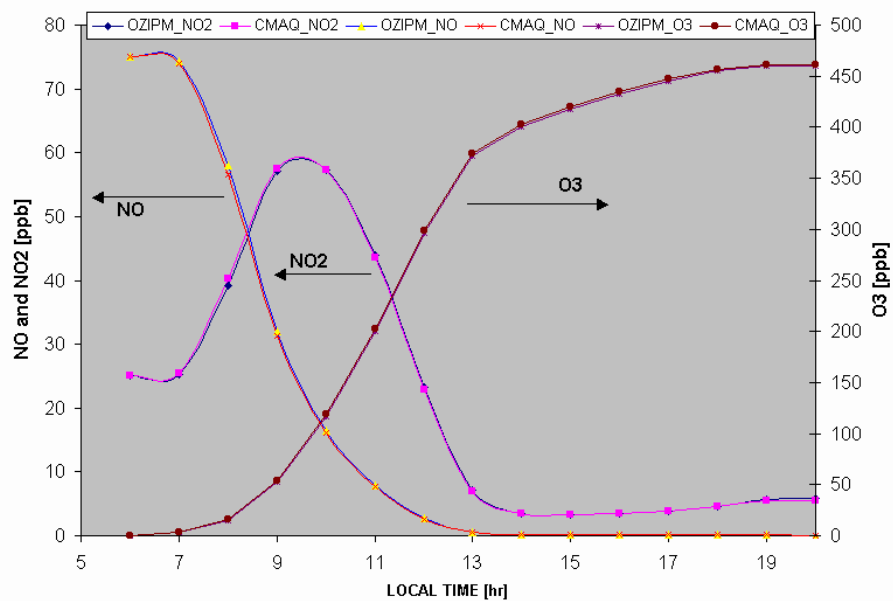

**Figure 3-9.** Comparison of results from the CMAQ and OZIPM box models for NO, NO<sub>2</sub> and O<sub>3</sub> at 298 K and 0.5 atmosphere.

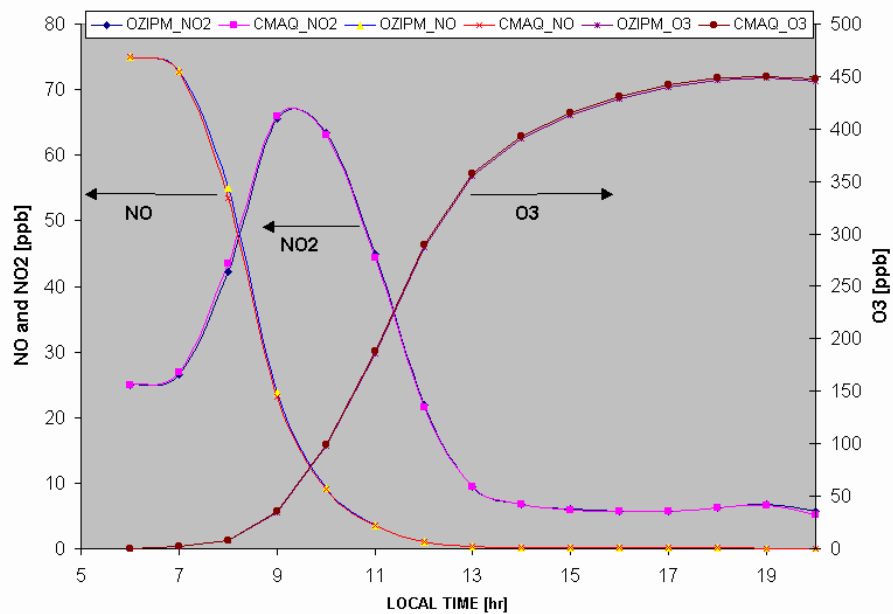

**Figure 3-10.** Comparison of results from the CMAQ and OZIPM box models for NO, NO<sub>2</sub> and O<sub>3</sub> at 310K and 1 atmosphere.

## 4. MECHANISM EVALUATION

### UNC CHAMBER

The University of North Carolina (UNC) operates a smog chamber facility as described in the CB4-2002 report (Jeffries, Voicu and Sexton; 2002). For this project, UNC provided a database of chamber experiments along with software (called Morpho) to simulate chamber experiments and assistance in using the data and software. The CB05 mechanism was implemented in the Morpho software and simulation results were compared to experimental data as shown below and in Appendix B.

### Updated UNC Wall Reaction Mechanism

The chemical mechanism used to simulate a chamber experiment must include reactions for both the gas-phase chemistry taking place in the chamber and the effects of the chamber walls. Chamber walls can provide both sources and sinks for reactive species. The role of the chamber walls is most apparent in experiments that are sensitive to input of radicals and/or reactive nitrogen species from the chamber walls, such as experiments with carbon monoxide (CO).

Jeffries, Voicu and Sexton (2002) revised the UNC chamber mechanism in the process of developing the CB4-2002. Nonetheless, the chamber characterization experiments from CB4-2002 still show biases for ozone and nitrogen species as shown in CO experiments in Figures 4-1 and 4-2 (from Jeffries, Voicu and Sexton; 2002). We reviewed and updated the chamber wall mechanism, as described below, to improve performance in chamber characterization experiments before beginning the evaluation of the CB05 mechanism. The improvement in the wall reaction mechanism can be seen in Figures 4-1 and 4-2 by comparing the CB05 (top) and CB4-2002 (bottom) simulations. Results of additional UNC chamber characterization experiments with CB05 are included in Appendix B.

The wall mechanism developed by Jeffries, Voicu and Sexton (2002) was modified in four ways:

- (1) The deposition rate of  $\text{N}_2\text{O}_5$  was increased by a factor of 9 in order to more accurately simulate the observed  $\text{NO}_2$  data in experiments with only  $\text{NO}_x$  and high CO. These experiments have essentially no PAN that normally might confound the data analysis.
- (2) Radicals from wall nitrous acid (HONO) photolysis were changed from a mechanism using  $\text{N}_2\text{O}_4$  on the walls to a mechanism based on NO,  $\text{NO}_2$ , and water on the walls.
- (3) A pathway releasing  $\text{NO}_2$  from nitric acid on the walls ( $\text{HNO}_3$ ) was added.
- (4) Loss of PNA ( $\text{HO}_2\text{NO}_2$ ) to the walls was added. This loss primarily impacts the highest CO experiments.

The original Jeffries, Voicu and Sexton (2002) wall reactions and the revised reactions used in this study are compared in Tables 4-1 and 4-2.

**Table 4-1.** Wall reactions from the Jeffries, Voicu and Sexton (2002) UNC chamber mechanisms that were changed for this project.

| Label | Reactants                                          | Products                       | Rate Expression |
|-------|----------------------------------------------------|--------------------------------|-----------------|
| W1    | N <sub>2</sub> O <sub>5</sub> + WH <sub>2</sub> O  | 2.0 * WHNO <sub>3</sub>        | 2.6E-18         |
| W2    | NO <sub>2</sub> + H <sub>2</sub> O                 | WNO <sub>2</sub>               | 1.0E-22         |
| W3    | WNO <sub>2</sub>                                   | NO <sub>2</sub>                | 6.6E-7          |
| W4    | WNO <sub>2</sub> +WNO <sub>2</sub>                 | WN <sub>2</sub> O <sub>4</sub> | 1.0E-10         |
| W5    | WN <sub>2</sub> O <sub>4</sub> + WH <sub>2</sub> O | WHONO + WHNO <sub>3</sub>      | 1.0E-14         |

**Table 4-2.** New wall reactions for the UNC chamber used in this project.

| Label | Reactants                                         | Products                | Rate Expression |
|-------|---------------------------------------------------|-------------------------|-----------------|
| W1    | N <sub>2</sub> O <sub>5</sub> + WH <sub>2</sub> O | 2.0 * WHNO <sub>3</sub> | 2.34E-17        |
| W2    | NO <sub>2</sub> + H <sub>2</sub> O                | WNO <sub>2</sub>        | 1.0E-23         |
| W3    | WNO <sub>2</sub>                                  | NO <sub>2</sub>         | 1.0E-4          |
| W4    | NO + H <sub>2</sub> O                             | WNO                     | 1.5E-23         |
| W5    | WNO                                               | NO                      | 1.0E-4          |
| W6    | WNO+WNO <sub>2</sub>                              | 2.0 * WHONO             | 2.0E-14         |
| W7    | WHNO <sub>3</sub>                                 | NO <sub>2</sub>         | 5.0E-6          |
| W8    | PNA + WH <sub>2</sub> O                           | WHNO <sub>3</sub>       | 1.0E-17         |

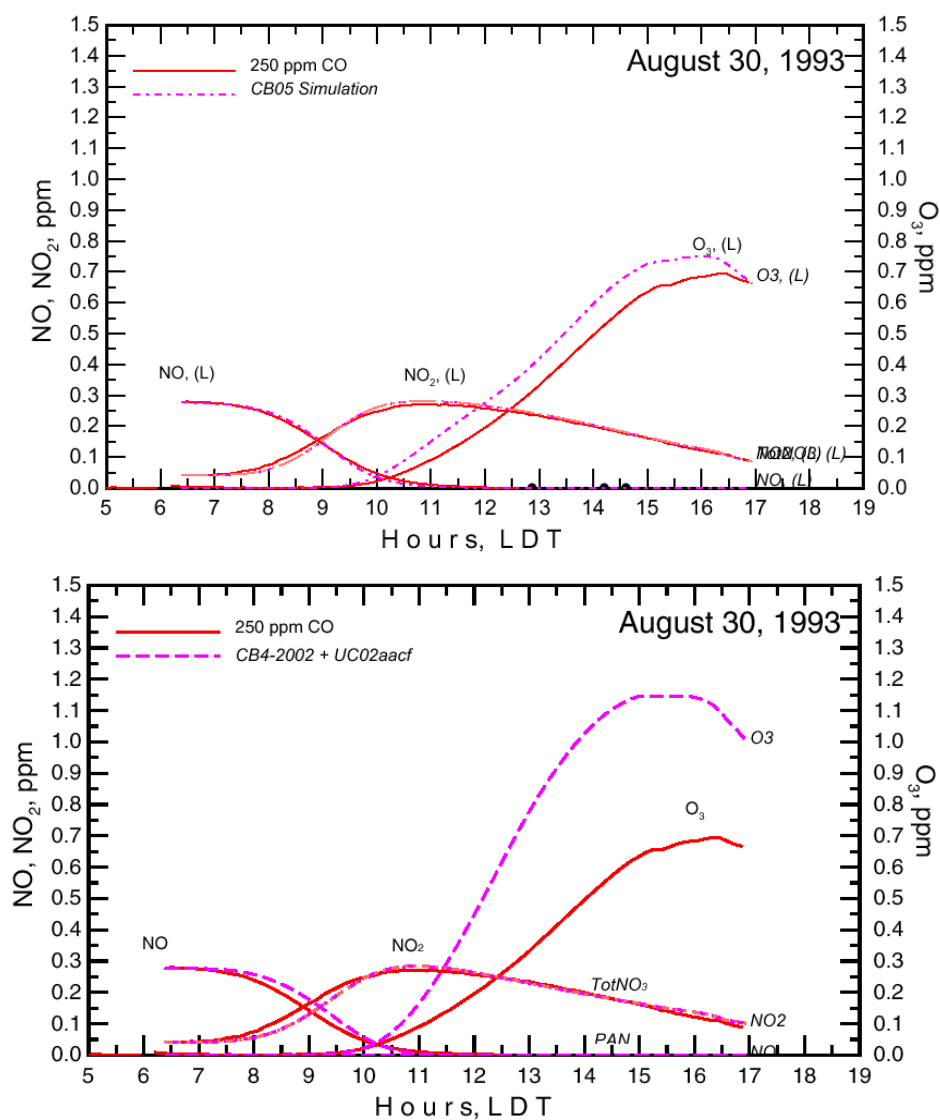

**Figure 4-1.** Comparison of CB05 (top) and CB4-2002 (bottom) simulations of UNC carbon monoxide experiment August 30, 1993 (red).

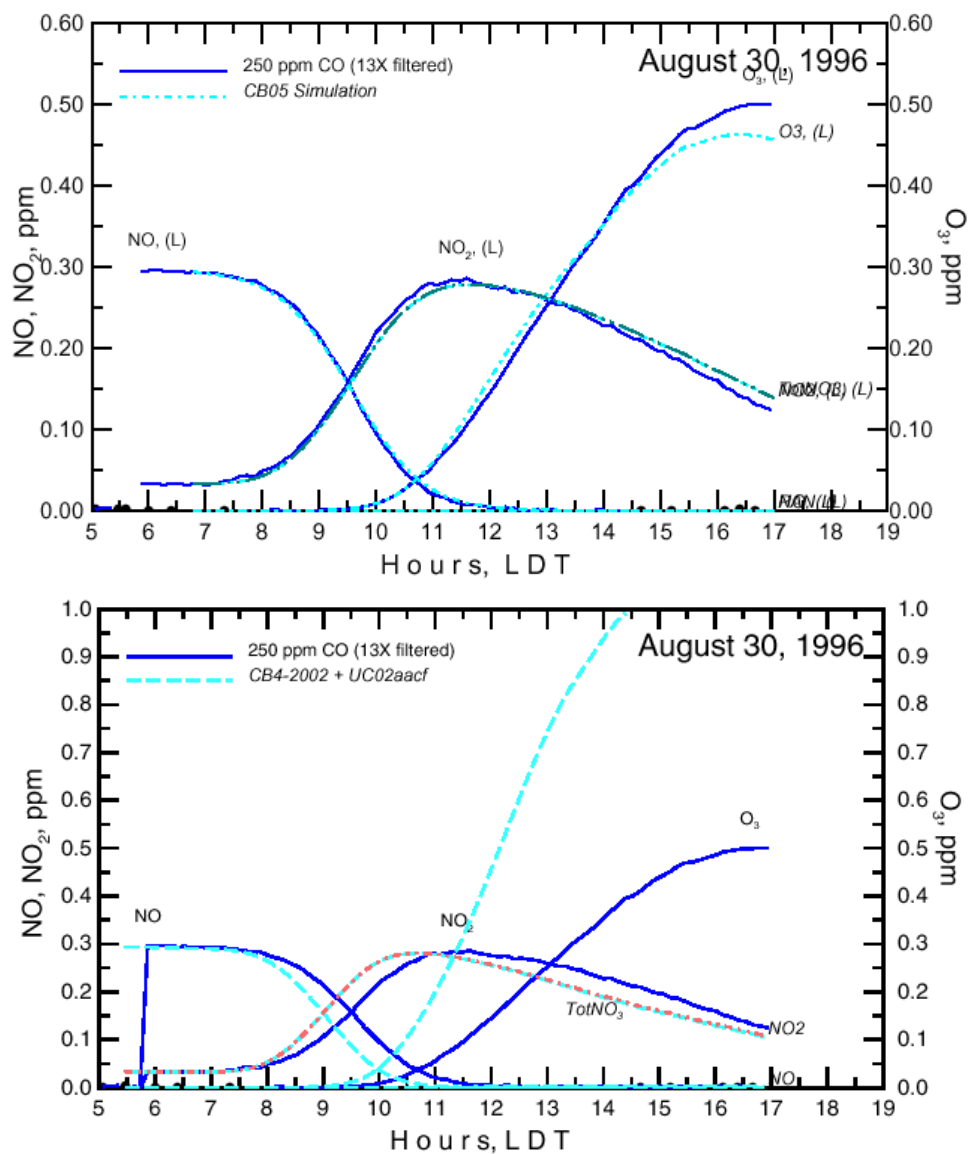

**Figure 4-2.** Comparison of CB05 (top) and CB4-2002 (bottom) simulations of UNC carbon monoxide experiment August 30, 1996 (blue).

## ALDX Mechanism Update

One of the CB05 updates discussed in Section 2 is the inclusion of a higher aldehyde species in addition to acetaldehyde. The impact of adding a higher aldehyde species (ALDX) to CB05 can be seen in performance for UBC chamber experiments for aldehydes larger than acetaldehyde. Figure 4-3 compares the performance of CB05 and CB4-2002 in simulating an experiment from September 4, 1997 (red chamber) with trimethylacetaldehyde and propionaldehyde. CB4-2002 represents these aldehydes using ALD2 and produces ozone too slowly, although the final ozone level is simulated quite well. CB05 produces ozone more rapidly because of greater radical production from ALDX photolysis than ALD2 photolysis. The rate of NO to NO<sub>2</sub> conversion also is simulated better by CB05 than CB4-2002.

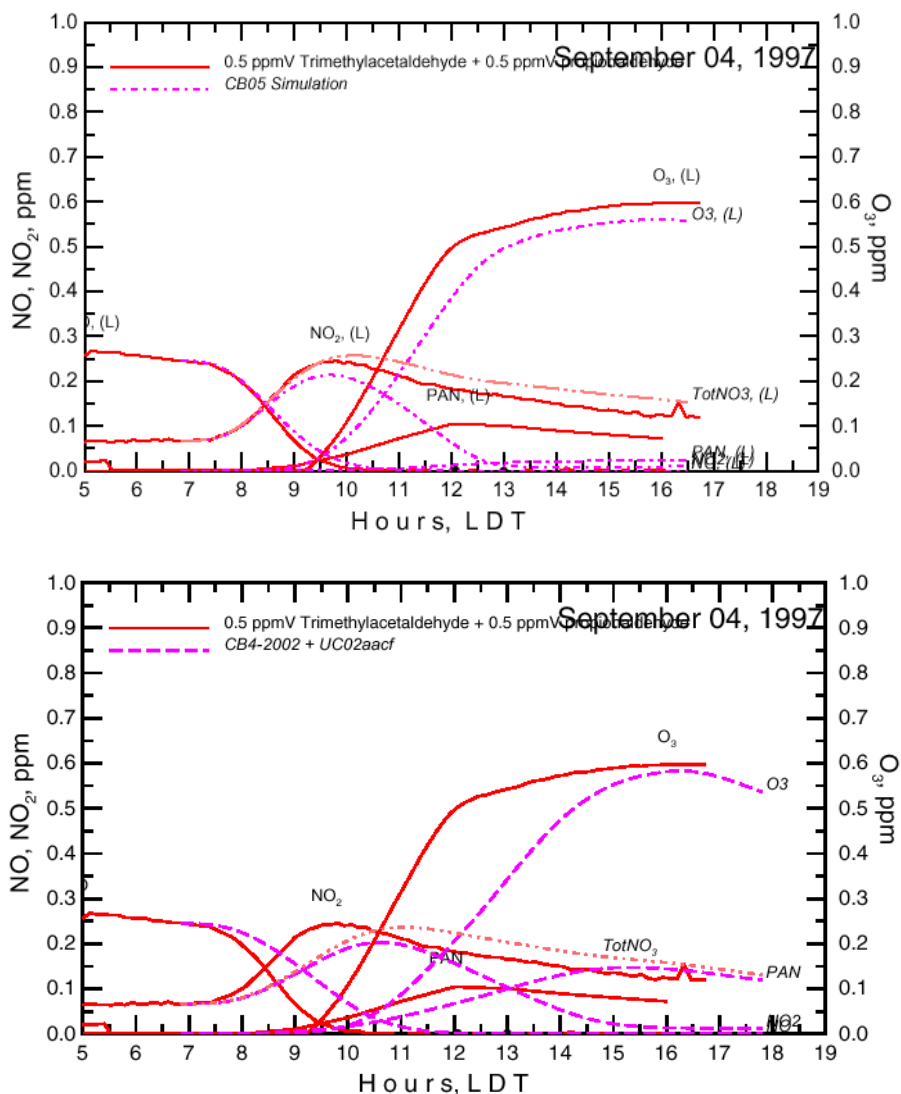

**Figure 4-3.** Comparison of CB05 (top) and CB4-2002 (bottom) simulations of UNC experiment of September 4, 1997 (red chamber) with trimethylacetaldehyde and propionaldehyde.

Including ALDX in CB05 also improves performance for olefins larger than propene. For example propionaldehyde is a product of 1-butene reactions and butyraldehyde is a product of 1-pentene reactions. Figure 4-4 compares CB05 and CB4-2002 performance for an experiment from October 16, 1996 (blue chamber) with propene, 1-butene and 1-pentene. The rate of ozone production and the rate of NO to NO<sub>2</sub> conversion are simulated much better by CB05 using ALDX than by CB4-2002 using ALD2 to represent the aldehyde products of olefin reactions.

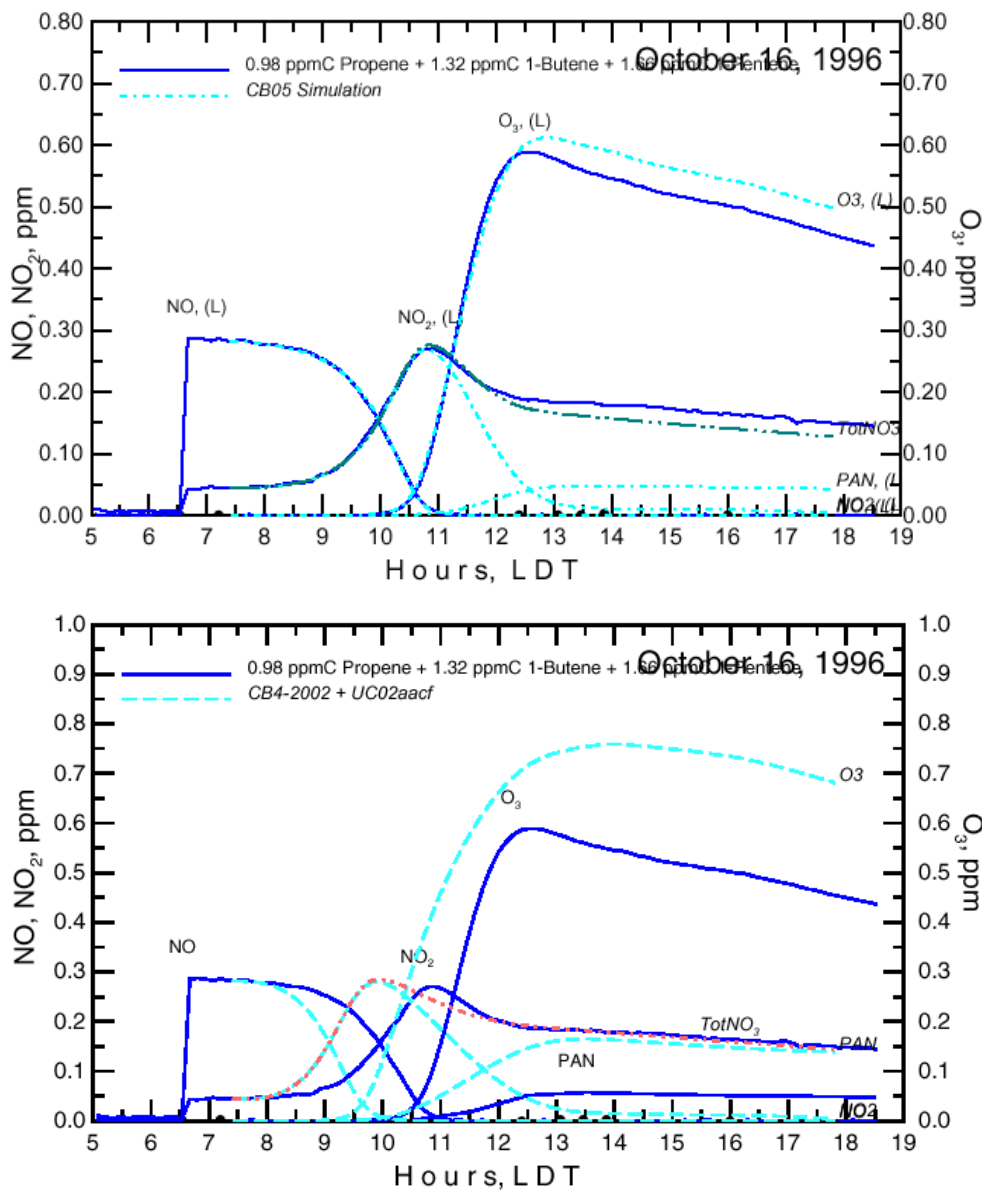

**Figure 4-4.** Comparison of CB05 (top) and CB4-2002 (bottom) simulations of UNC experiment October 16, 1996 (blue chamber) with propene, 1-butene and 1-pentene.

## IOLE Mechanism Update

Including IOLE in CB05 also improves performance for internal olefins (i.e., RHC=CHR) compared to the CB4 surrogate representation of 2 ALD2. Figure 4-5 compares CB05 and CB4-2002 performance for an experiment from September 14, 1996 (blue chamber) with an equimolar mixture of all butene isomers (1-butene, cis-2-butene, trans-2-butene, isobutene). CB05 does better than CB4-2002 in simulating the rate of ozone production, the final ozone level and the rate of NO to NO<sub>2</sub> conversion. CB05 produces ozone more rapidly because of radical production from IOLE reactions and formation of ALDX as a product in addition to ALD2.

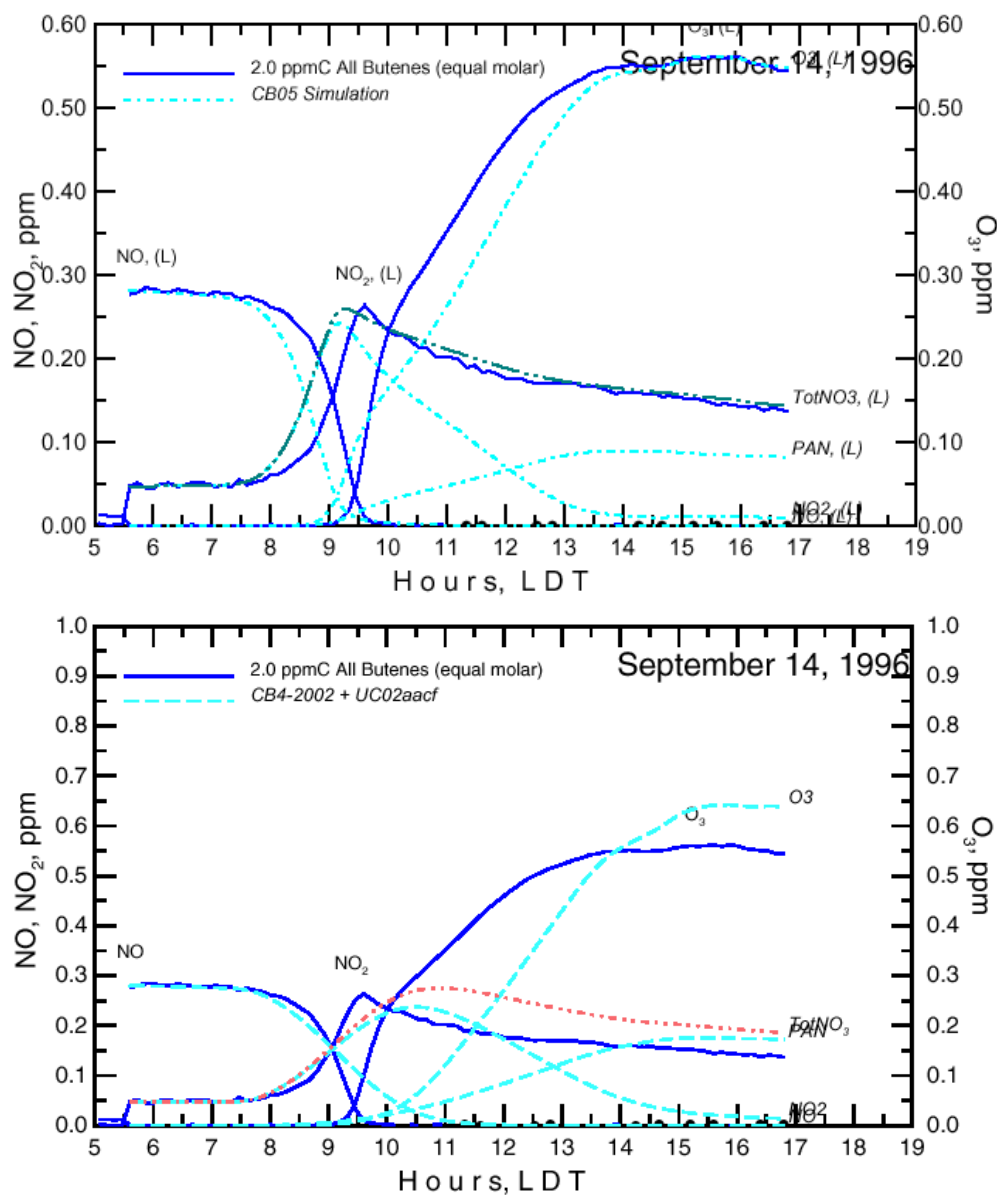

**Figure 4-5.** Comparison of CB05 (top) and CB4-2002 (bottom) simulations of UNC experiment September 14, 1996 (blue chamber) with an equimolar mixture of all butene isomers (1-butene, cis-2-butene, trans-2-butene, isobutene).

## Summary of CB05 Performance for UNC Chamber Experiments

Results of CB05 simulations for UNC chamber experiments are shown in Appendix B. Experiments are grouped according to the VOC introduced into the red chamber. Each experiment is identified by date and chamber (red or blue) and further details on each experiment are given in Jeffries, Voicu and Sexton (2002).

The performance of CB05 against the UNC chamber data is summarized as follows:

**Chamber Background.** The chamber background experiments mostly reflect the wall mechanism and performed well.

**Carbon monoxide.** The CO experiments reflect the wall mechanism and core inorganic chemistry in CB05 and performed well with a couple of exceptions that are not understood.

**Formaldehyde.** The formaldehyde experiments test formaldehyde and basic radical chemistry. CB05 performed very well.

**Methane.** Methane experiments are somewhat sensitive to the chamber wall mechanism and any impurity in the methane because methane has very low reactivity. CB05 performed well with a couple of exceptions that are not understood

**Acetaldehyde (ALD2).** Acetaldehyde experiments add PAN formation and additional radical reactions to the chemistry tested by methane and formaldehyde experiments. CB05 performed well for experiments with acetaldehyde and acetaldehyde mixtures.

**Higher aldehydes (ALDX).** CB05 performed well for experiments with higher aldehyde mixtures. As discussed above, ALDX is an area of improvement in CB05 over CB4.

**Ethene (ETH).** Ethene experiments test ethene and formaldehyde chemistry. CB05 performed quite well for ethene experiments.

**Terminal olefins (OLE).** Terminal olefins test the OLE chemistry for alk-1-enes and rely upon ADLX, ALD2 and formaldehyde chemistry. CB05 performed quite well for OLE experiments.

**Olefin mixtures (IOLE and OLE).** Internal olefins test the IOLE chemistry for alk-2-enes and similar compounds and rely upon ADLX, ALD2 and formaldehyde chemistry. CB05 performed well for IOLE experiments.

**Alkanes (PAR).** Alkane experiments test the PAR chemistry in addition to the aldehyde and inorganic chemistry. CB05 over predicted ozone in one butane experiments but not others. CB05 performed well for alkanes higher than butane.

**Aromatics (TOL and XYL).** Aromatics chemistry is complex and includes several species specific to aromatics, but also relies upon simpler aldehyde chemistry. CB05 performance showed more scatter for aromatics than other species. CB05 generally under-predicted the initial rise in ozone and the peak ozone, but did not show a clear

trend toward over or under prediction of the final ozone formation. This result differs from the UCR chamber evaluation presented below.

**Isoprene.** Isoprene is an explicit species in CB05 that involves the aldehyde and basic inorganic chemistry. CB05 tended to under predict ozone formation in isoprene experiments. This result is surprising as the isoprene chemistry was not overtly changed from the previous CB4 mechanisms (e.g., CB4-2002). The current CB05 isoprene mechanism was implemented as a translation of the SAPRC one-product isoprene mechanism. This should be revisited, possibly by implementing a “three product” mechanism with methacrolein and methylvinyl ketone as explicit products (Carter 1996).

**Urban Mixtures.** CB05 tended to under predict ozone formation in many but not all experiments with the UNC synthetic urban mixture. Further investigation would be needed to understand this performance.

## UCR CHAMBER

The University of California at Riverside (UCR) operates several smog chambers including a new chamber (the “EPA chamber”), described by Carter et al., 2005, which is capable of experiments at lower NO<sub>x</sub> levels than the earlier chambers. Dr. Carter of UCR performed chamber simulations to evaluate both the CB05 and the SAPRC99 “fixed parameter” mechanisms (Carter, 2000) for this study. Results from several simulations in the EPA chamber are shown in Figures 4-6 to 4-15. The results are summarized as follows. CB05 and SAPRC99 performance was similar for experiments with CO, formaldehyde and ethene. CB05 performed somewhat better than SAPRC99 for propene although both mechanisms performed quite well. CB05 and SAPRC99 performance was similar and good for butane.

The CB05 and SAPRC99 fixed parameter version (Carter, 2000) were compared against experiments from several chambers at UCR. Dr. Carter at UCR performed the UCR chamber simulations for both CB05 and SAPRC99 and provided the results to the CB05 mechanism developers.

Over 350 UCR experiments for individual compounds and compound mixtures were used to evaluate the mechanisms as listed in Tables 4-3 and 4-4. Each group of experiments was compared by displaying the bias in predicted oxidant production (O<sub>3</sub>-NO) with experiment time, as seen in Figure 4-16. The bias values (prediction minus observation divided by observation) are assigned to ranges (bins) and counted. Good performance is shown by most of the counts being in the bins with low bias. Separate lines are shown for each hour of the experiment (1 to 6 hours) to reveal biases in the rate of oxidant production (early hours) versus biases in the final amount of oxidant (late hours).

Different compounds test different parts of the photochemical mechanisms, as discussed above in the evaluation against UNC chamber data. Compounds are ordered in Figure 4-16 and the discussion below so as to involve progressively more of the mechanism in the evaluation.

**Carbon Monoxide (CO).** The CO experiments were used by UCR to adjust the chamber wall mechanism for CB05. The UCR chamber wall mechanisms differ by chamber and were

not reevaluated in detail for CB05. A single parameter that controls the production of radicals by wall reactions was adjusted (upward) for CB05 compared to SAPRC99.

**Formaldehyde.** CB05 showed a slight under-prediction bias for formaldehyde in contrast to SAPRC99, which showed neutral bias. This may be related to differences in the OH plus NO<sub>2</sub> rate constant between CB05 and SAPRC99 (CB05 rate is slightly higher). Note that CB05 and SAPRC99 are using the same photolysis data for formaldehyde so this is not a factor in the different performance of the two mechanisms.

**Acetaldehyde.** Both mechanisms performed well for acetaldehyde with CB05 performing exceptionally well.

**Ethene.** CB05 and SAPRC99 performance for ethene was similar with both mechanisms showing a slight positive bias. The similarity in CB05 and SAPRC99 performance for ethane is surprising given the difference in performance for formaldehyde (see above) because ethene experiments are very sensitive to the formaldehyde mechanism.

**Propene.** Both CB05 and SAPRC99 tended to under-predict oxidant production for propene in the UCR chambers, especially in the early experiment hours. CB05 had less under-prediction of the final oxidant levels from propene than SAPRC99.

**Trans-2-butene.** This compound tests the new IOLE chemistry in CB05. CB05 performed very well for trans-2-butene. SAPRC99 tended to under-estimate the initial oxidant production rate but then performed similar to CB05 in predicting the final oxidant levels.

**Isoprene.** CB05 and SAPRC99 performed similarly and well for isoprene with near zero bias being the most frequent performance. CB05 had a slightly broader bias distribution than SAPRC99. This may be because SAPRC99 has a more complex "3-product" mechanism than the CB05 "1-product" mechanism. The CB05 1-product mechanism is a translation of the SAPRC 1-product mechanism.

**n-Butane.** CB05 had a narrower and negative bias distribution whereas SAPRC99 had a broader and positive bias distribution for n-butane. For both mechanisms, near-zero bias was the most frequent outcome for the final oxidant levels in n-butane experiments.

**n-Octane.** Both CB05 and SAPRC99 tended to under-predict oxidant production from n-octane, with greater negative bias for SAPRC99 than CB05.

**Toluene.** CB05 under-predicted the initial rate of oxidant formation from toluene but tended to produce the right final oxidant levels. SAPRC99 tended to slightly under-predict the initial oxidant production rate but slightly over-predict the final oxidant levels for toluene. Thus, SAPRC99 has closer to zero overall bias for toluene than CB05.

**m-Xylene.** CB05 tended to under-predict the initial rate of oxidant formation from m-xylene and slightly under-predict the final oxidant levels. SAPRC99 performance for m-xylene was very good and most often showed zero bias for oxidant levels throughout experiments.

**o-Xylene.** Both CB05 and SAPRC99 showed a lot of scatter in oxidant bias for o-xylene. CB05 had less scatter and tended to under-predict the final oxidants whereas SAPRC99 had more scatter and tended to over-predict the final oxidant levels for o-xylene.

**1,2,4-Trimethylbenzene.** Both CB05 and SAPRC99 showed scattered oxidant bias for 1,2,4-Trimethylbenzene. CB05 tended to under-predict the final oxidants whereas SAPRC99 tended to over-predict the final oxidant levels for 1,2,4-trimethylbenzene.

**Alpha-pinene and beta-pinene.** The new CB05 terpene mechanism is a translation of the SAPRC99 lumped terpene mechanism, so CB05 and SAPRC99 are expected to show similar performance for alpha- and beta-pinene, as was the case. Performance for alpha-pinene was much better than for beta-pinene illustrating the difficulty in representing oxidant formation from both species using a single lumped terpene mechanism.

**Surrogate mixtures.** Oxidant performance was evaluated for two different types of multi-species mixtures (surrogate mixtures) employed at UCR that are referred to as the “EPA Surrogate” and the “Full Surrogate.” CB05 and SAPRC99 performance for surrogate mixtures is quite similar. For the “EPA Surrogate” experiments, both mechanisms show scattered negative bias with a greater tendency to under-predict the early oxidant production rate and lesser bias for the final oxidant levels. The assessment for the “Full Surrogate” runs is similar except that the CB05 bias is less scattered and marginally closer to neutral than SAPRC99. Overall, CB05 shows less scatter but SAPRC99 has marginally less negative bias than CB05 for the final oxidant levels in surrogate mixture experiments. Neither mechanism performed clearly better than the other in the surrogate mixture experiments.

The area of most difference between CB05 and SAPRC99 is aromatics chemistry. The SAPRC99 aromatics chemistry performs much better than CB05 against the UCR chamber data. CB05 predicts less ozone formation from aromatics than SAPRC99, especially for toluene, and therefore systematically under predicts the UCR chamber ozone in aromatics experiments. CB05 showed less tendency to under predict ozone in UNC aromatics chamber experiments than UCR experiments. There appears to be a systematic difference in the aromatics experiments between the UCR and UNC chambers that may be related to the chambers or the design of the experiments. This could be investigated by evaluating the SAPRC99 mechanism against UNC chamber experiments. Further work is warranted to understand differences in the UCR and UNC aromatics experiments and differences between the aromatics mechanisms.

**Table 4-3.** Compounds and numbers of UCR experiments included in the comparison between CB05 and SAPRC99 mechanism performance.

| Compound               | Number of Experiments |
|------------------------|-----------------------|
| Carbon monoxide        | 18                    |
| Formaldehyde           | 24                    |
| Acetaldehyde           | 12                    |
| Ethene                 | 39                    |
| Propene                | 89                    |
| t-2-Butene             | 12                    |
| Isoprene               | 18                    |
| Butane                 | 10                    |
| Octane                 | 5                     |
| Toluene                | 28                    |
| m-Xylene               | 27                    |
| o-Xylene               | 13                    |
| 123-trimethylbenzene   | 9                     |
| Alpha-Pinene           | 11                    |
| Beta-Pinene            | 9                     |
| EPA surrogate mixture  | 25                    |
| Full surrogate mixture | 18                    |

**Table 4-4.** Numbered UCR chamber experiments used to evaluate the CB05 and SAPRC99 mechanisms, by compound.

| Table 1. Numbered GC-MS number experiments used to evaluate the GC-MS and GC-MS-MS methods, by compound. |                   |                   |         |         |         |                    |          |         |         |         |          |          |                                  |          |          |                  |                   |
|----------------------------------------------------------------------------------------------------------|-------------------|-------------------|---------|---------|---------|--------------------|----------|---------|---------|---------|----------|----------|----------------------------------|----------|----------|------------------|-------------------|
| CO                                                                                                       | Form-<br>aldehyde | Acet-<br>aldehyde | Ethene  | Propene |         | trans-2-<br>Butene | Isoprene | Butane  | Octane  | Toluene | m-Xylene | o-Xylene | 1,2,3-tri-<br>methyl-<br>benzene | a-Pinene | b-Pinene | EPA<br>Surrogate | Full<br>Surrogate |
| 18                                                                                                       | 24                | 12                | 39      | 89      |         | 12                 | 18       | 10      | 5       | 28      | 27       | 13       | 9                                | 11       | 9        | 25               | 18                |
| CTC031                                                                                                   | ITC1549           | DTC150A           | ITC1555 | ETC440  | XTC081  | EC146              | ITC511   | ETC484  | EPA114B | ITC534  | DTC073A  | DTC207A  | DTC201A                          | ETC420   | ETC421   | EPA080A          | DTC251A           |
| CTC061                                                                                                   | ITC1554           | DTC150B           | ITC926  | ETC449  | XTC082  | EC147              | ITC811   | ETC488  | EPA095A | ITC699  | DTC188A  | DTC207B  | DTC203A                          | ETC443   | ETC433   | EPA080B          | DTC251B           |
| CTC090A                                                                                                  | ITC864            | DTC152B           | ITC936  | DTC026A | XTC097  | EC157              | ITC812   | ETC094  | EPA083B | ITC828  | DTC188B  | DTC208A  | DTC203B                          | ETC444   | ETC434   | EPA081A          | DTC455A           |
| CTC090B                                                                                                  | ETC378            | DTC387B           | ETC220  | DTC026B | XTC113  | ETC493             | DTC053A  | ETC097  | EPA085B | DTC042A | DTC189A  | DTC208B  | DTC204A                          | ETC446   | ETC435   | EPA081B          | DTC455B           |
| EPA057A                                                                                                  | ETC441            | XTC083            | ETC221  | DTC128A | CTC012  | ETC501             | DTC053B  | ETC135  | EPA113B | DTC042B | DTC189B  | DTC209A  | DTC204B                          | ETC447   | ETC442   | EPA082A          | DTC474A           |
| EPA057B                                                                                                  | DTC149A           | XTC092            | ETC381  | DTC128B | CTC018  | ETC307             | DTC056A  | ETC224  |         | DTC151A | DTC191A  | DTC209B  | CTC056                           | XTC095   | XTC099   | EPA082B          | DTC474B           |
| EPA058A                                                                                                  | DTC149B           | CTC014            | ETC439  | DTC129A | CTC023  | ETC309             | DTC056B  | ETC389  |         | DTC155A | DTC191B  | CTC038   | CTC091B                          | OTC318A  | OTC318B  | EPA083A          | DTC488A           |
| EPA058B                                                                                                  | DTC218A           | CTC015            | ETC464  | DTC129B | CTC049  | DTC043B            | XTC093   | ETC393  |         | DTC158A | DTC192A  | CTC039   | CTC093A                          | ETC508   | DTC051B  | EPA084B          | DTC488B           |
| EPA061A                                                                                                  | DTC218B           | CTC032            | ETC466  | DTC205A | CTC059  | DTC021B            | XTC101   | DTC019B |         | DTC170A | DTC192B  | CTC046   | CTC093B                          | DTC045B  | DTC048A  | EPA085A          | DTC616A           |
| EPA061B                                                                                                  | DTC270A           | CTC072            | ETC467  | DTC205B | CTC078  | DTC069A            | EC520    | DTC031A |         | XTC106  | DTC193A  | CTC068   |                                  | DTC044A  |          | EPA086A          | DTC616B           |
| EPA070A                                                                                                  | DTC270B           | EC164             | ETC469  | DTC246A | CTC083A | DTC041A            | EC522    |         |         | CTC026  | DTC193B  | CTC081   |                                  | DTC034B  |          | EPA095B          | CTC149A           |
| EPA070B                                                                                                  | DTC387A           | EC254             | ETC471  | DTC288A | CTC083B | DTC033A            | EC524    |         |         | CTC034  | CTC029   | CTC091A  |                                  |          |          | EPA096A          | CTC149B           |
| EPA071A                                                                                                  | XTC086            |                   | ETC473  | DTC288B | CTC086A |                    | EC527    |         |         | CTC048  | CTC035   | EC288    |                                  |          |          | EPA096B          | CTC165A           |
| EPA071B                                                                                                  | CTC016            |                   | ETC476  | DTC301A | CTC086B |                    | EC669    |         |         | CTC065  | CTC036   |          |                                  |          |          | EPA097A          | CTC165B           |
| EPA103A                                                                                                  | CTC024            |                   | ETC479  | DTC301B | CTC115A |                    | OTC309A  |         |         | CTC079  | CTC066   |          |                                  |          |          | EPA097B          | CTC171A           |
| EPA103B                                                                                                  | CTC077            |                   | ETC482  | DTC331A | CTC115B |                    | OTC309B  |         |         | EC264   | CTC080   |          |                                  |          |          | EPA098A          | CTC171B           |
| EPA140A                                                                                                  | CTC095A           |                   | ETC486  | DTC331B | CTC132A |                    | OTC316A  |         |         | EC266   | CTC094A  |          |                                  |          |          | EPA098B          | OTC277A           |
| EPA140B                                                                                                  | CTC095B           |                   | ETC497  | DTC346A | CTC132B |                    | OTC316B  |         |         | EC269   | CTC094B  |          |                                  |          |          | EPA100A          | OTC277B           |
|                                                                                                          | CTC116A           |                   | ETC505  | DTC346B | CTC147A |                    |          |         |         | EC270   | ETC196   |          |                                  |          |          | EPA101A          |                   |
|                                                                                                          | CTC116B           |                   | DTC041B | DTC371A | CTC147B |                    |          |         |         | EC271   | ETC207   |          |                                  |          |          | EPA101B          |                   |
|                                                                                                          | CTC133A           |                   | DTC043A | DTC371B | CTC153A |                    |          |         |         | EC273   | ETC301   |          |                                  |          |          | EPA108B          |                   |
|                                                                                                          | CTC133B           |                   | DTC044B | DTC393A | CTC153B |                    |          |         |         | EC293   | DTC025A  |          |                                  |          |          | EPA110B          |                   |
|                                                                                                          | CTC176A           |                   | DTC045A | DTC393B | CTC163A |                    |          |         |         | EC327   | DTC068B  |          |                                  |          |          | EPA113A          |                   |
|                                                                                                          | CTC176B           |                   | DTC046B | DTC405A | CTC163B |                    |          |         |         | EC340   | DTC035A  |          |                                  |          |          | EPA114A          |                   |
|                                                                                                          |                   |                   | DTC047A | DTC405B | CTC170A |                    |          |         |         | OTC299A | DTC067B  |          |                                  |          |          | EPA123A          |                   |
|                                                                                                          |                   |                   | DTC048B | DTC417A | CTC170B |                    |          |         |         | OTC299B | CTC109A  |          |                                  |          |          |                  |                   |
|                                                                                                          |                   |                   | DTC050A | DTC417B | CTC191A |                    |          |         |         | OTC300A | CTC128A  |          |                                  |          |          |                  |                   |
|                                                                                                          |                   |                   | DTC051A | DTC431A | CTC191B |                    |          |         |         | OTC300B |          |          |                                  |          |          |                  |                   |
|                                                                                                          |                   |                   | DTC072B | DTC431B | CTC203A |                    |          |         |         |         |          |          |                                  |          |          |                  |                   |
|                                                                                                          |                   |                   | XTC105  | DTC443A | CTC203B |                    |          |         |         |         |          |          |                                  |          |          |                  |                   |
|                                                                                                          |                   |                   | XTC112  | DTC443B | CTC219A |                    |          |         |         |         |          |          |                                  |          |          |                  |                   |
|                                                                                                          |                   |                   | EC142   | DTC458A | CTC219B |                    |          |         |         |         |          |          |                                  |          |          |                  |                   |
|                                                                                                          |                   |                   | EC143   | DTC458B | CTC234A |                    |          |         |         |         |          |          |                                  |          |          |                  |                   |
|                                                                                                          |                   |                   | EC156   | DTC472A | CTC234B |                    |          |         |         |         |          |          |                                  |          |          |                  |                   |
|                                                                                                          |                   |                   | EC285   | DTC472B | CTC245A |                    |          |         |         |         |          |          |                                  |          |          |                  |                   |
|                                                                                                          |                   |                   | EC286   | DTC483A | CTC245B |                    |          |         |         |         |          |          |                                  |          |          |                  |                   |
|                                                                                                          |                   |                   | EC287   | DTC483B | CTC264A |                    |          |         |         |         |          |          |                                  |          |          |                  |                   |
|                                                                                                          |                   |                   | EPA073A | DTC503A | CTC264B |                    |          |         |         |         |          |          |                                  |          |          |                  |                   |
|                                                                                                          |                   |                   | EPA073B | DTC503B | OTC272A |                    |          |         |         |         |          |          |                                  |          |          |                  |                   |
|                                                                                                          |                   |                   |         | DTC526A | OTC272B |                    |          |         |         |         |          |          |                                  |          |          |                  |                   |
|                                                                                                          |                   |                   |         | DTC526B | OTC295A |                    |          |         |         |         |          |          |                                  |          |          |                  |                   |
|                                                                                                          |                   |                   |         | DTC578A | OTC295B |                    |          |         |         |         |          |          |                                  |          |          |                  |                   |
|                                                                                                          |                   |                   |         | DTC578B | OTC298A |                    |          |         |         |         |          |          |                                  |          |          |                  |                   |
|                                                                                                          |                   |                   |         | DTC597A | OTC298B |                    |          |         |         |         |          |          |                                  |          |          |                  |                   |
|                                                                                                          |                   |                   |         | DTC597B |         |                    |          |         |         |         |          |          |                                  |          |          |                  |                   |

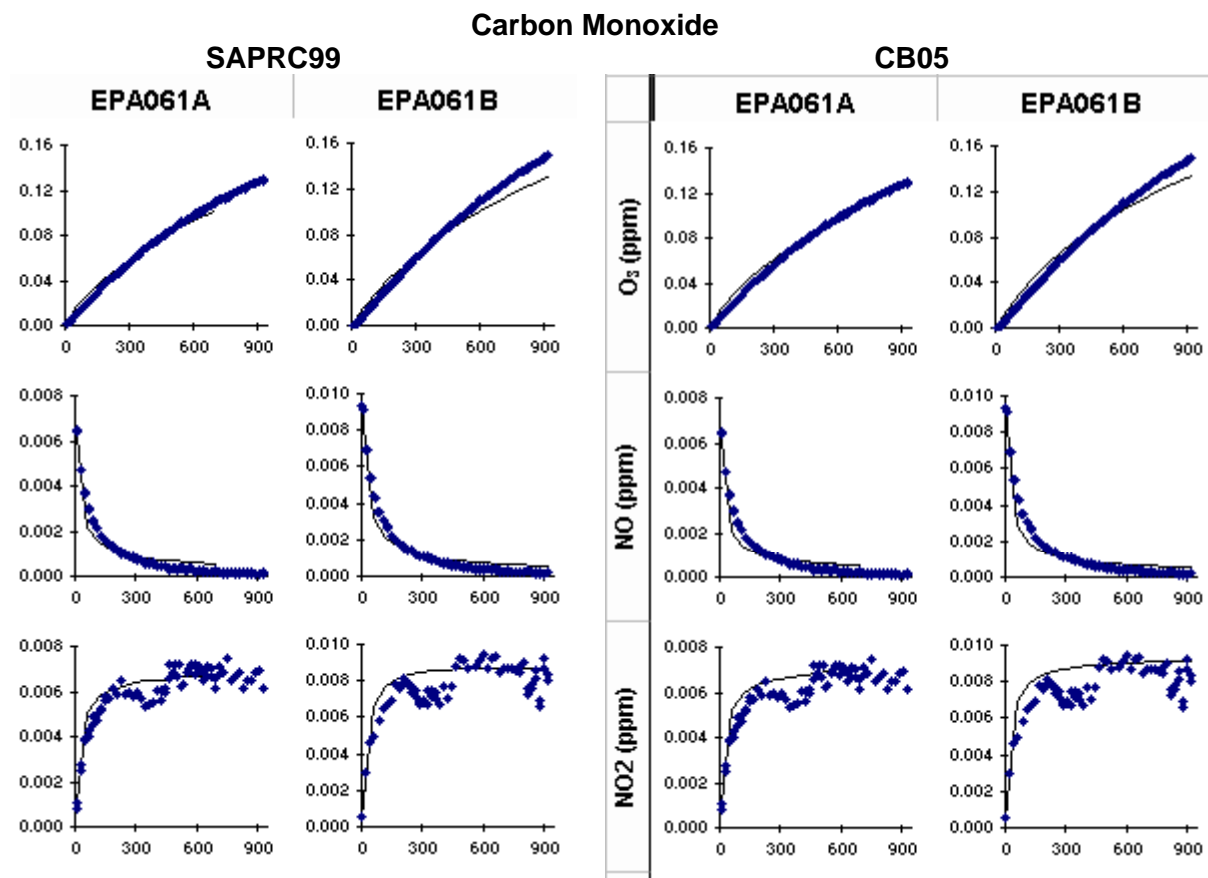

**Figure 4-6.** SAPRC99 (left) and CB05 (right) simulation of a carbon monoxide experiment in the EPA chamber at UCR.

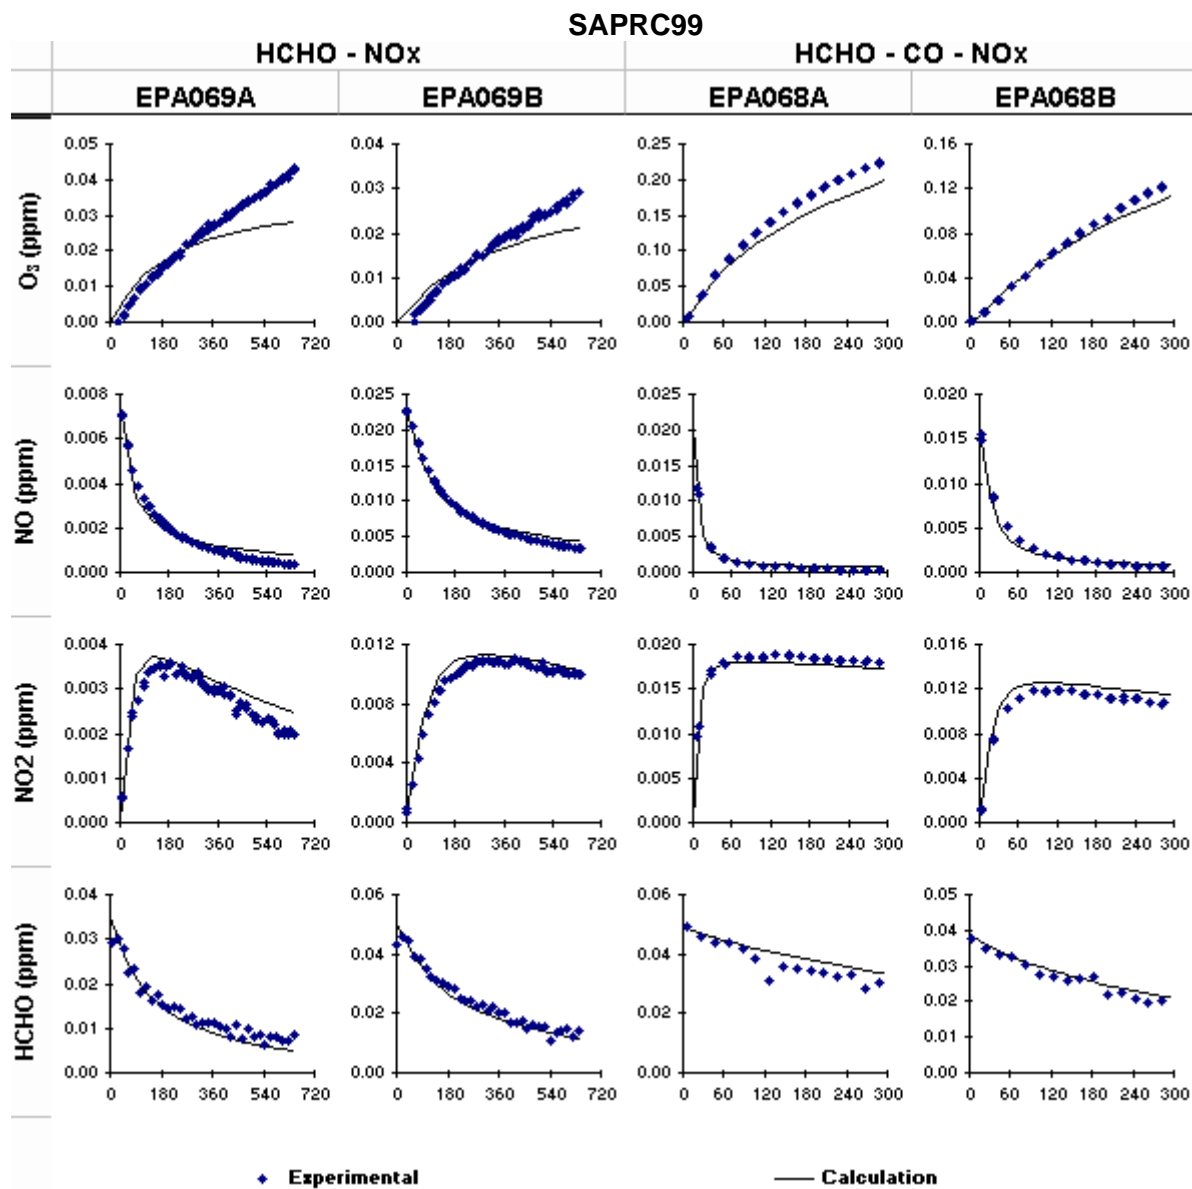

**Figure 4-7.** SAPRC99 simulation of four formaldehyde experiments in the EPA chamber at UCR.

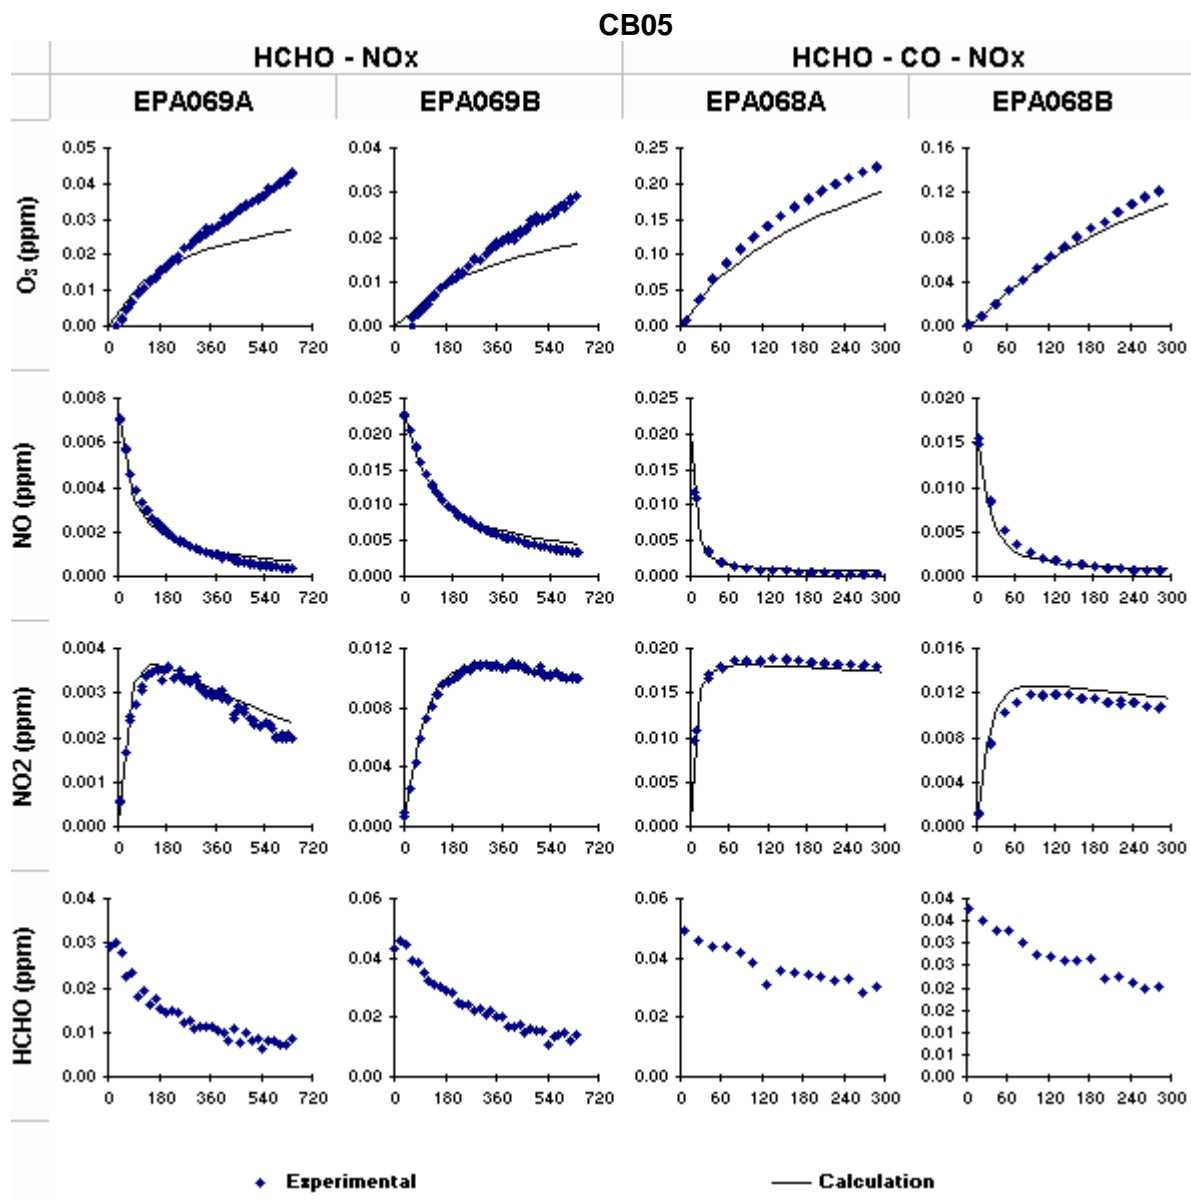

**Figure 4-8.** CB05 simulation of four formaldehyde experiments in the EPA chamber at UCR.

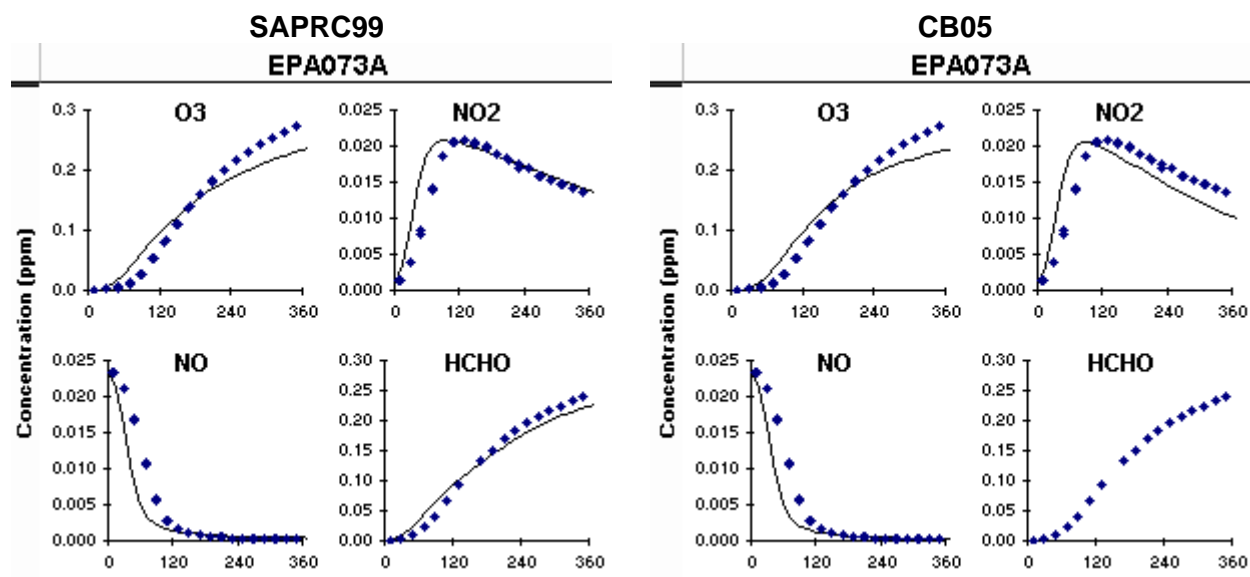

**Figure 4-9.** SAPRC99 (left) and CB05 (right) simulation of an ethene experiment in the EPA chamber at UCR.

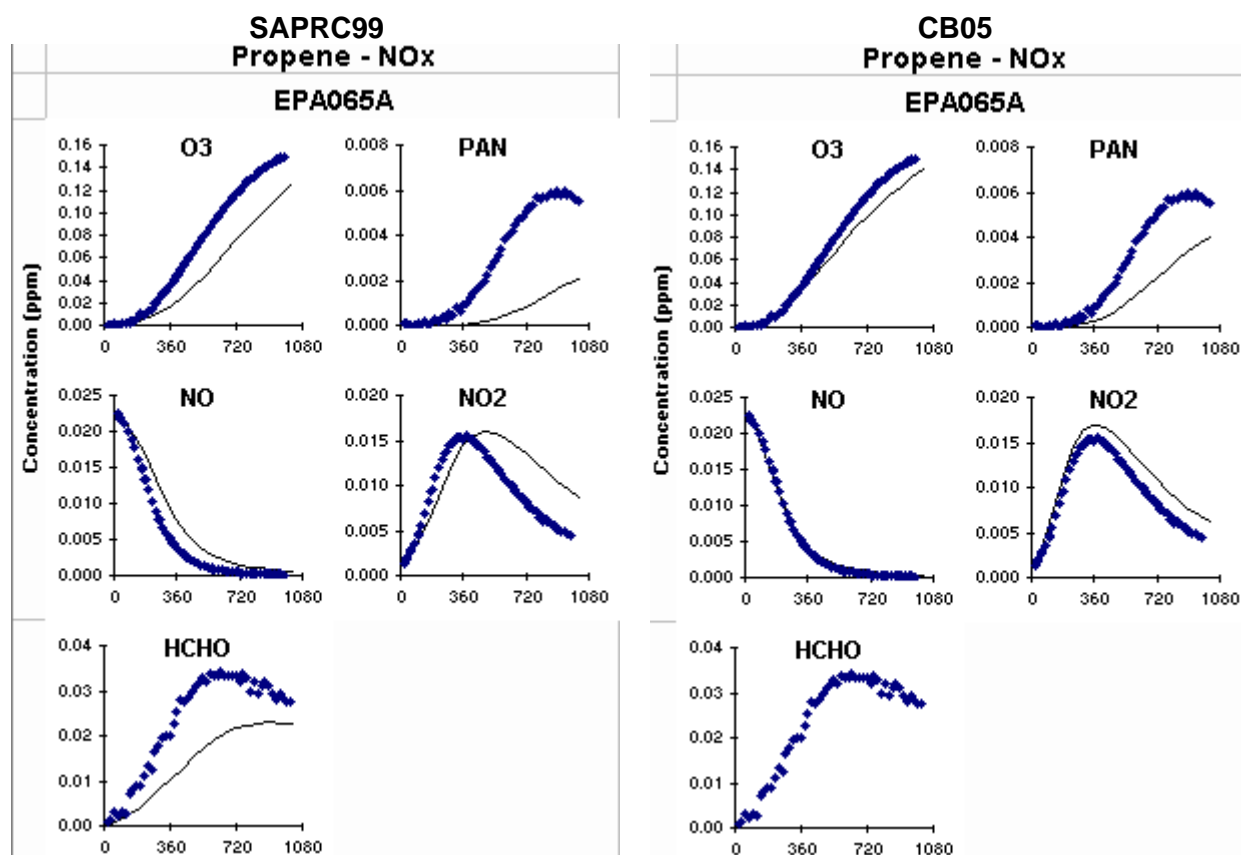

**Figure 4-10.** SAPRC99 (left) and CB05 (right) simulation of a propene experiment in the EPA chamber at UCR.

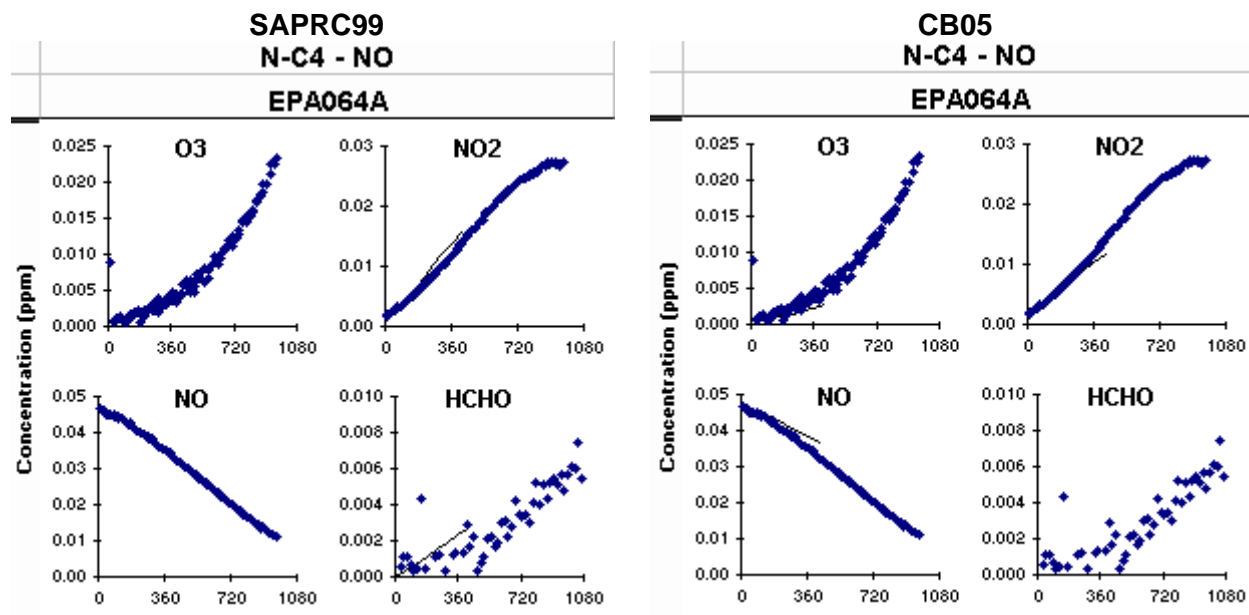

**Figure 4-11.** SAPRC99 (left) and CB05 (right) simulation of a butane experiment in the EPA chamber at UCR.

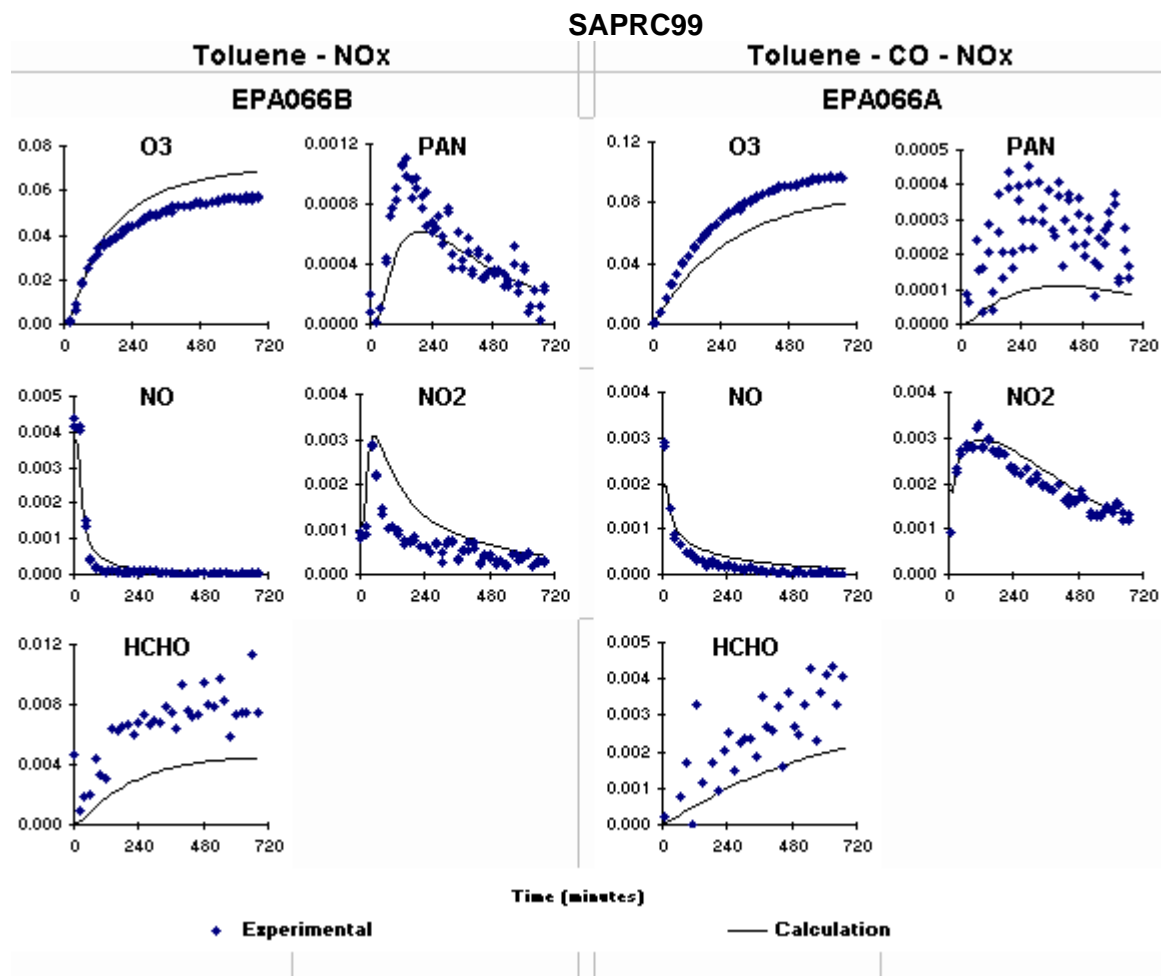

**Figure 4-12.** SAPRC99 simulation of two toluene experiments in the EPA chamber at UCR.

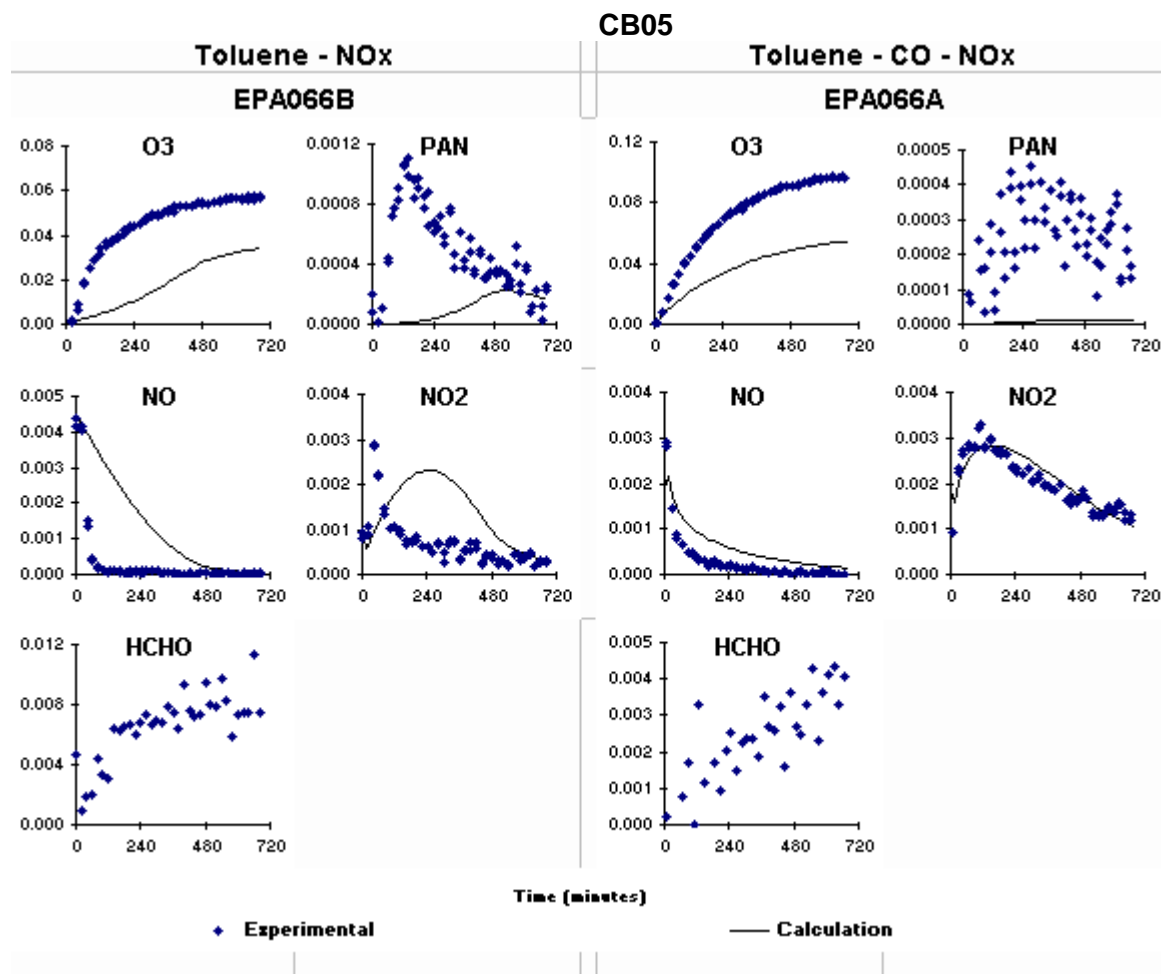

**Figure 4-13.** CB05 simulation of two toluene experiments in the EPA chamber at UCR.

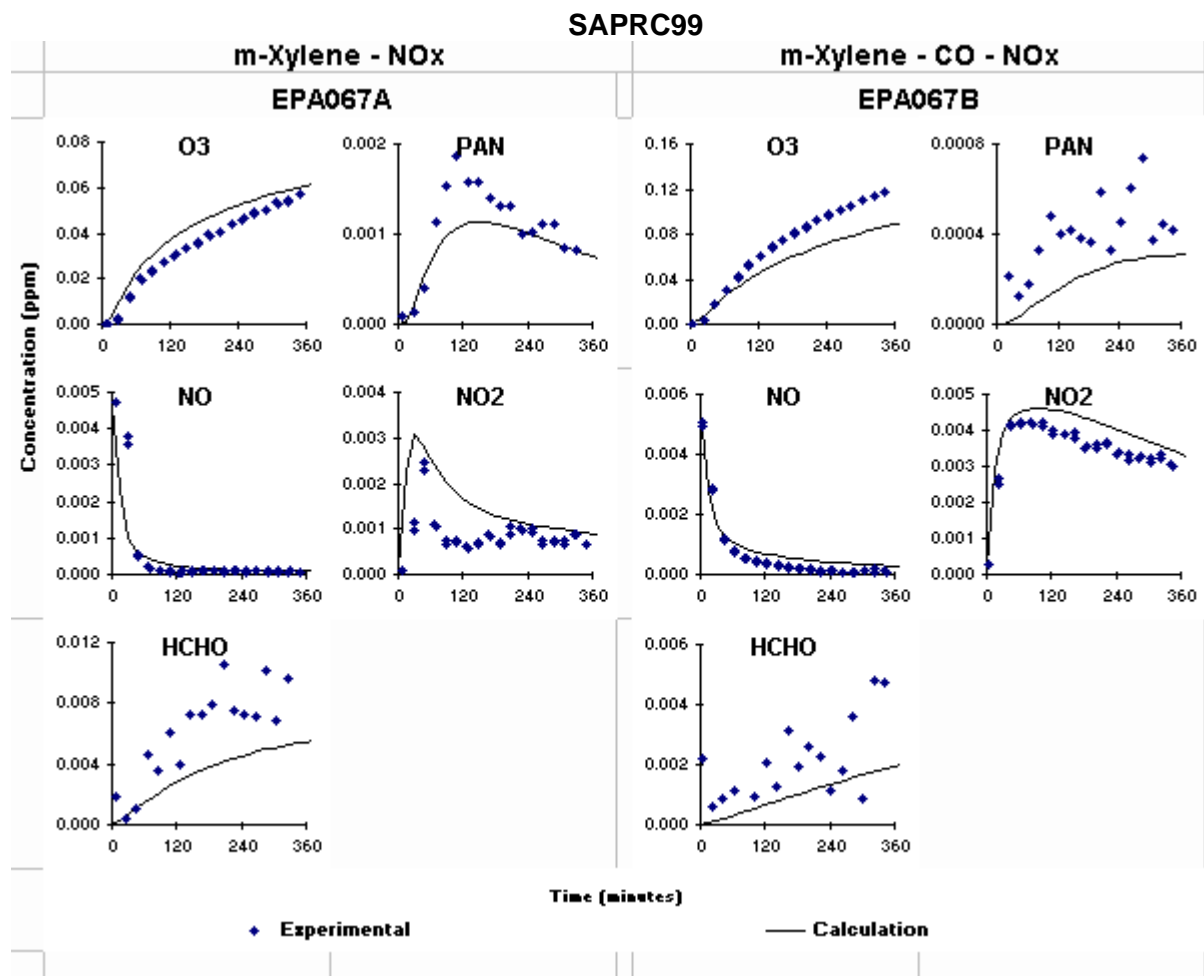

**Figure 4-14.** SAPRC99 simulation of two xylene experiments in the EPA chamber at UCR.

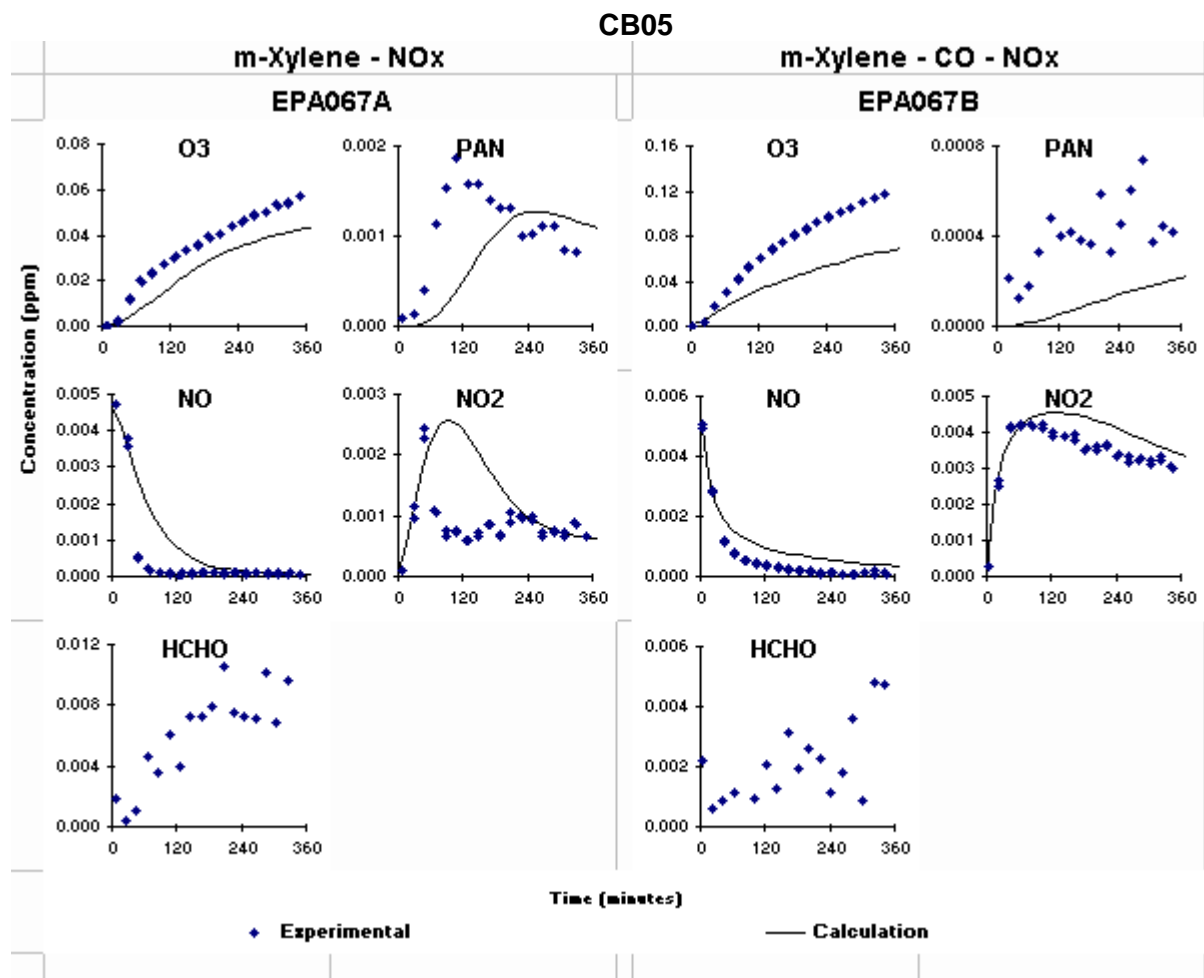

**Figure 4-15.** CB05 simulation of two xylene experiments in the EPA chamber at UCR.

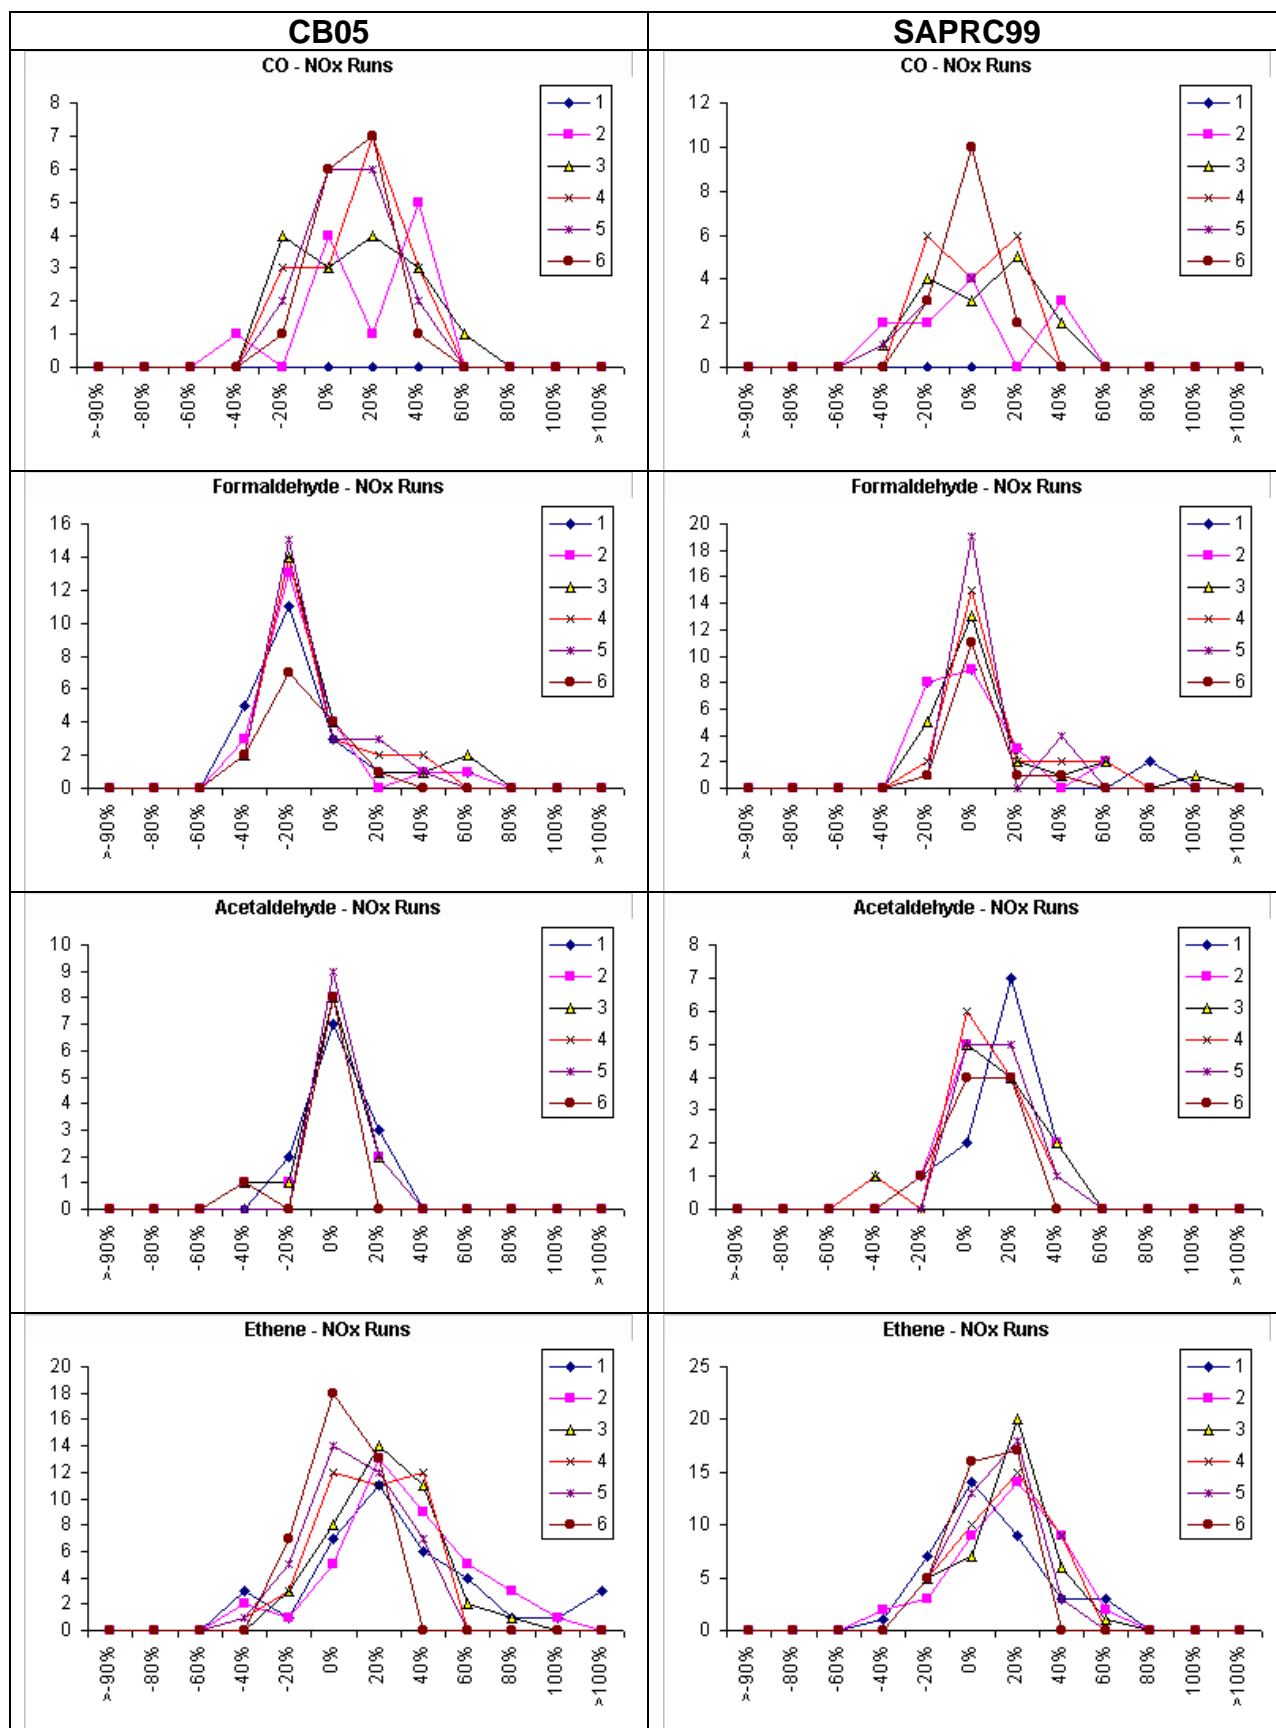

**Figure 4-16.** Bias in oxidant production ( $O_3$ -NO) at hours 1-6 in UCR chamber experiments for the CB05 and SAPRC99 mechanisms, by compound.

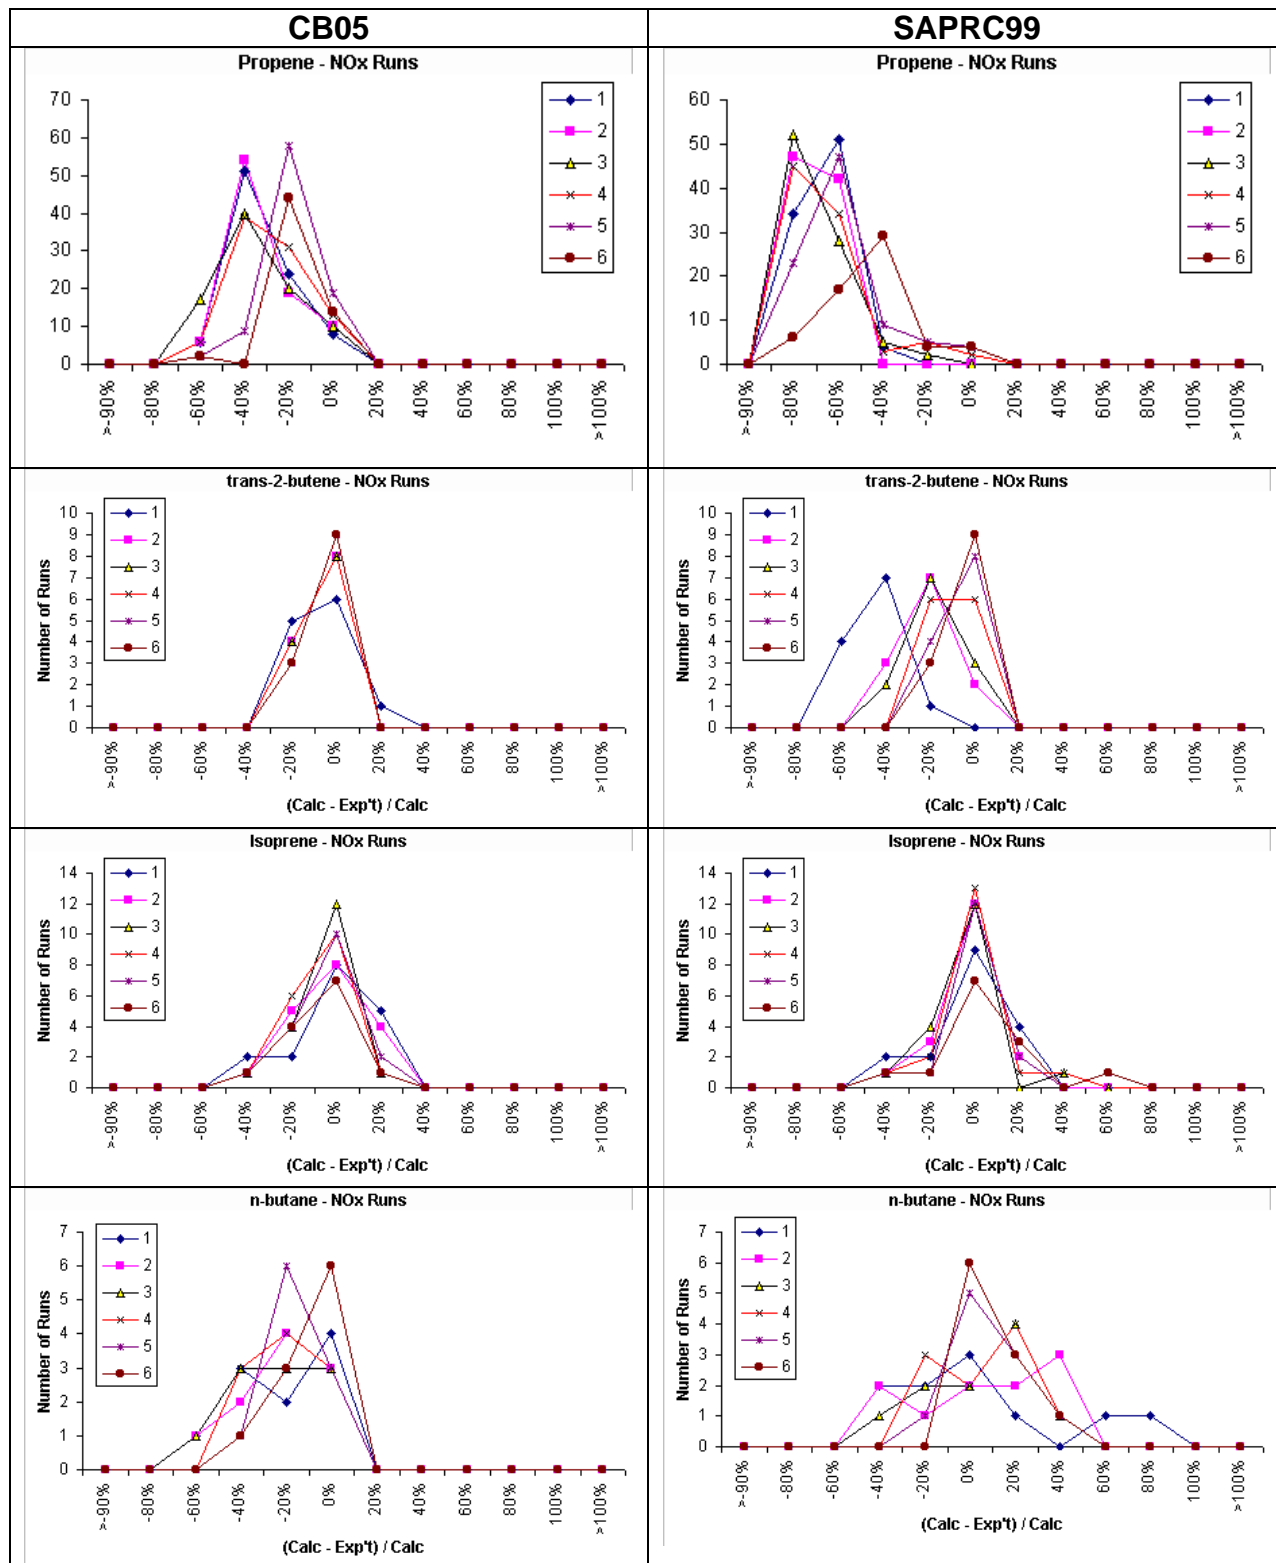

**Figure 4-16.** (continued). Bias in oxidant production ( $O_3$ -NO) at hours 1-6 in UCR chamber experiments for the CB05 and SAPRC99 mechanisms, by compound.

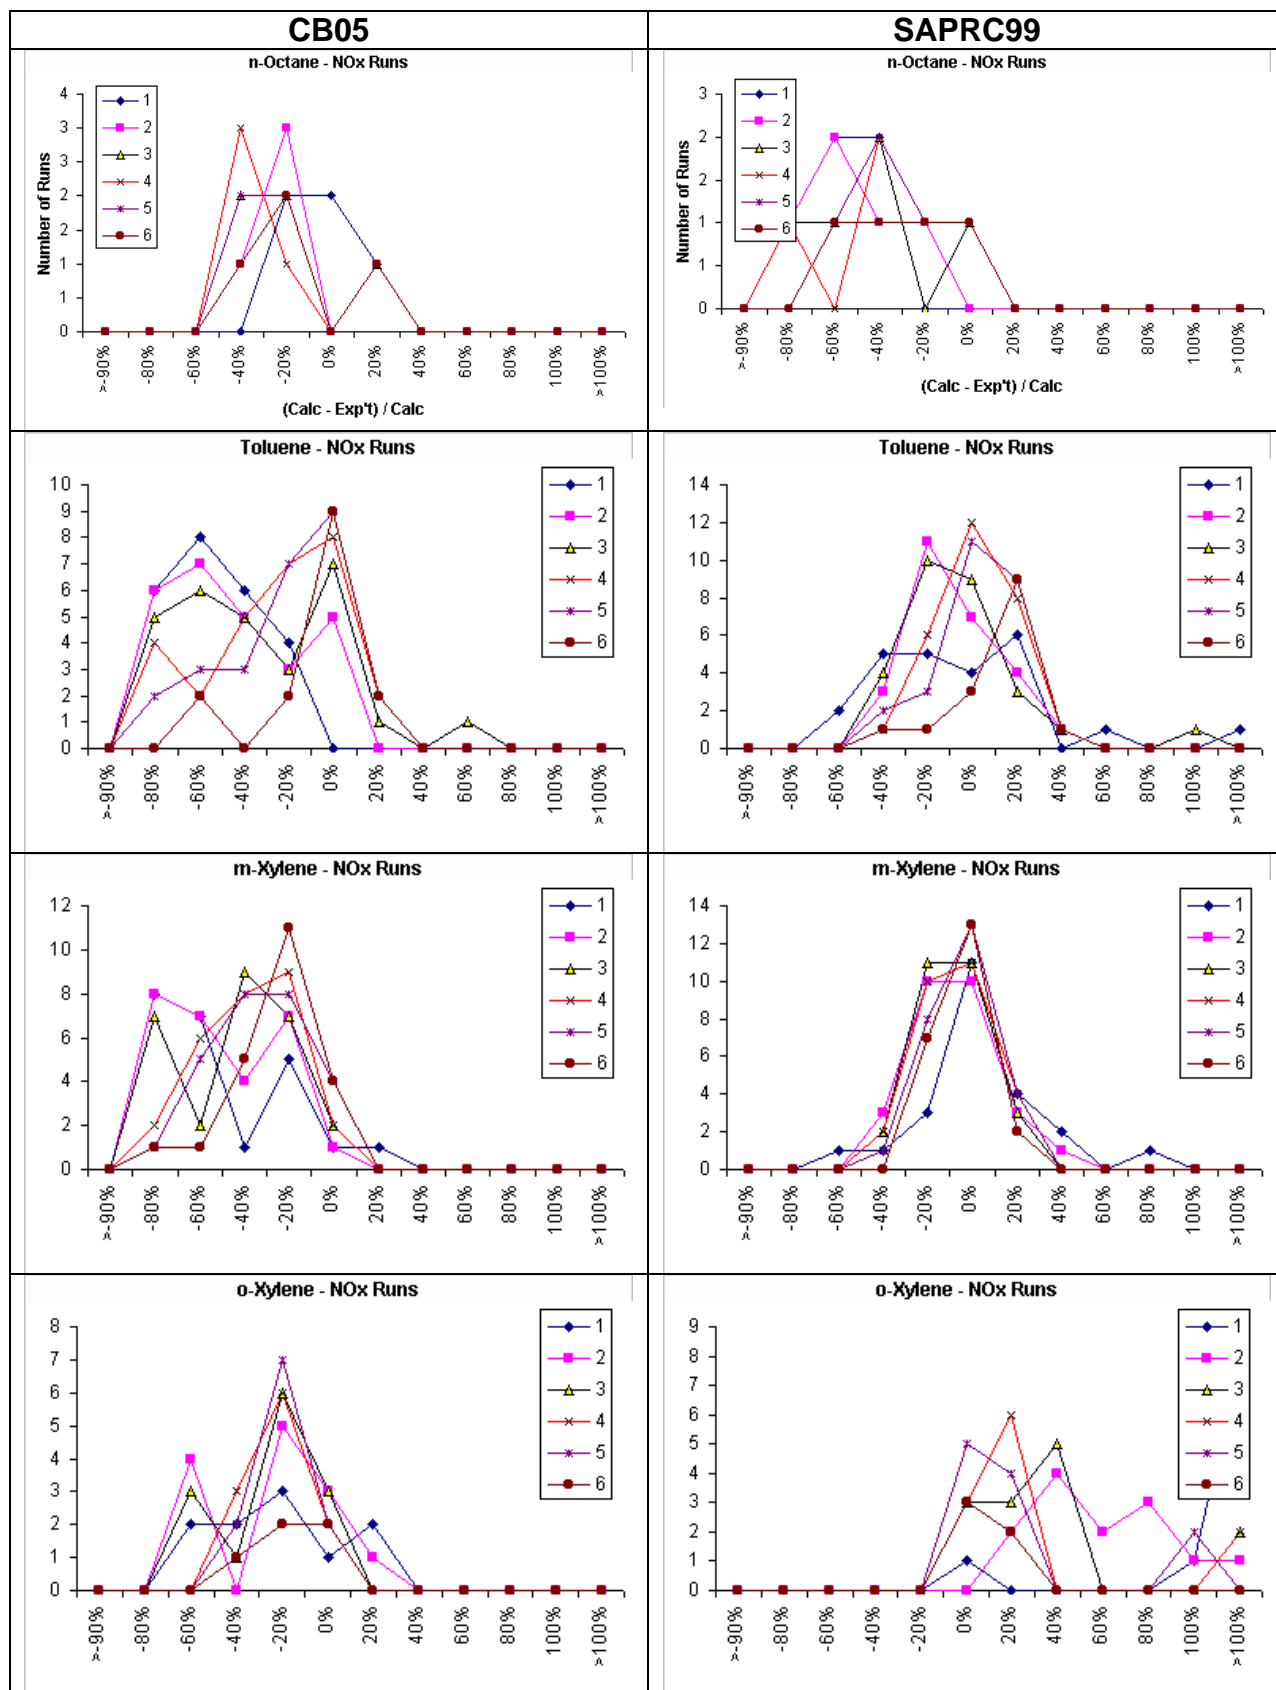

**Figure 4-16.** (continued). Bias in oxidant production ( $\text{O}_3\text{-NO}$ ) at hours 1-6 in UCR chamber experiments for the CB05 and SAPRC99 mechanisms, by compound.

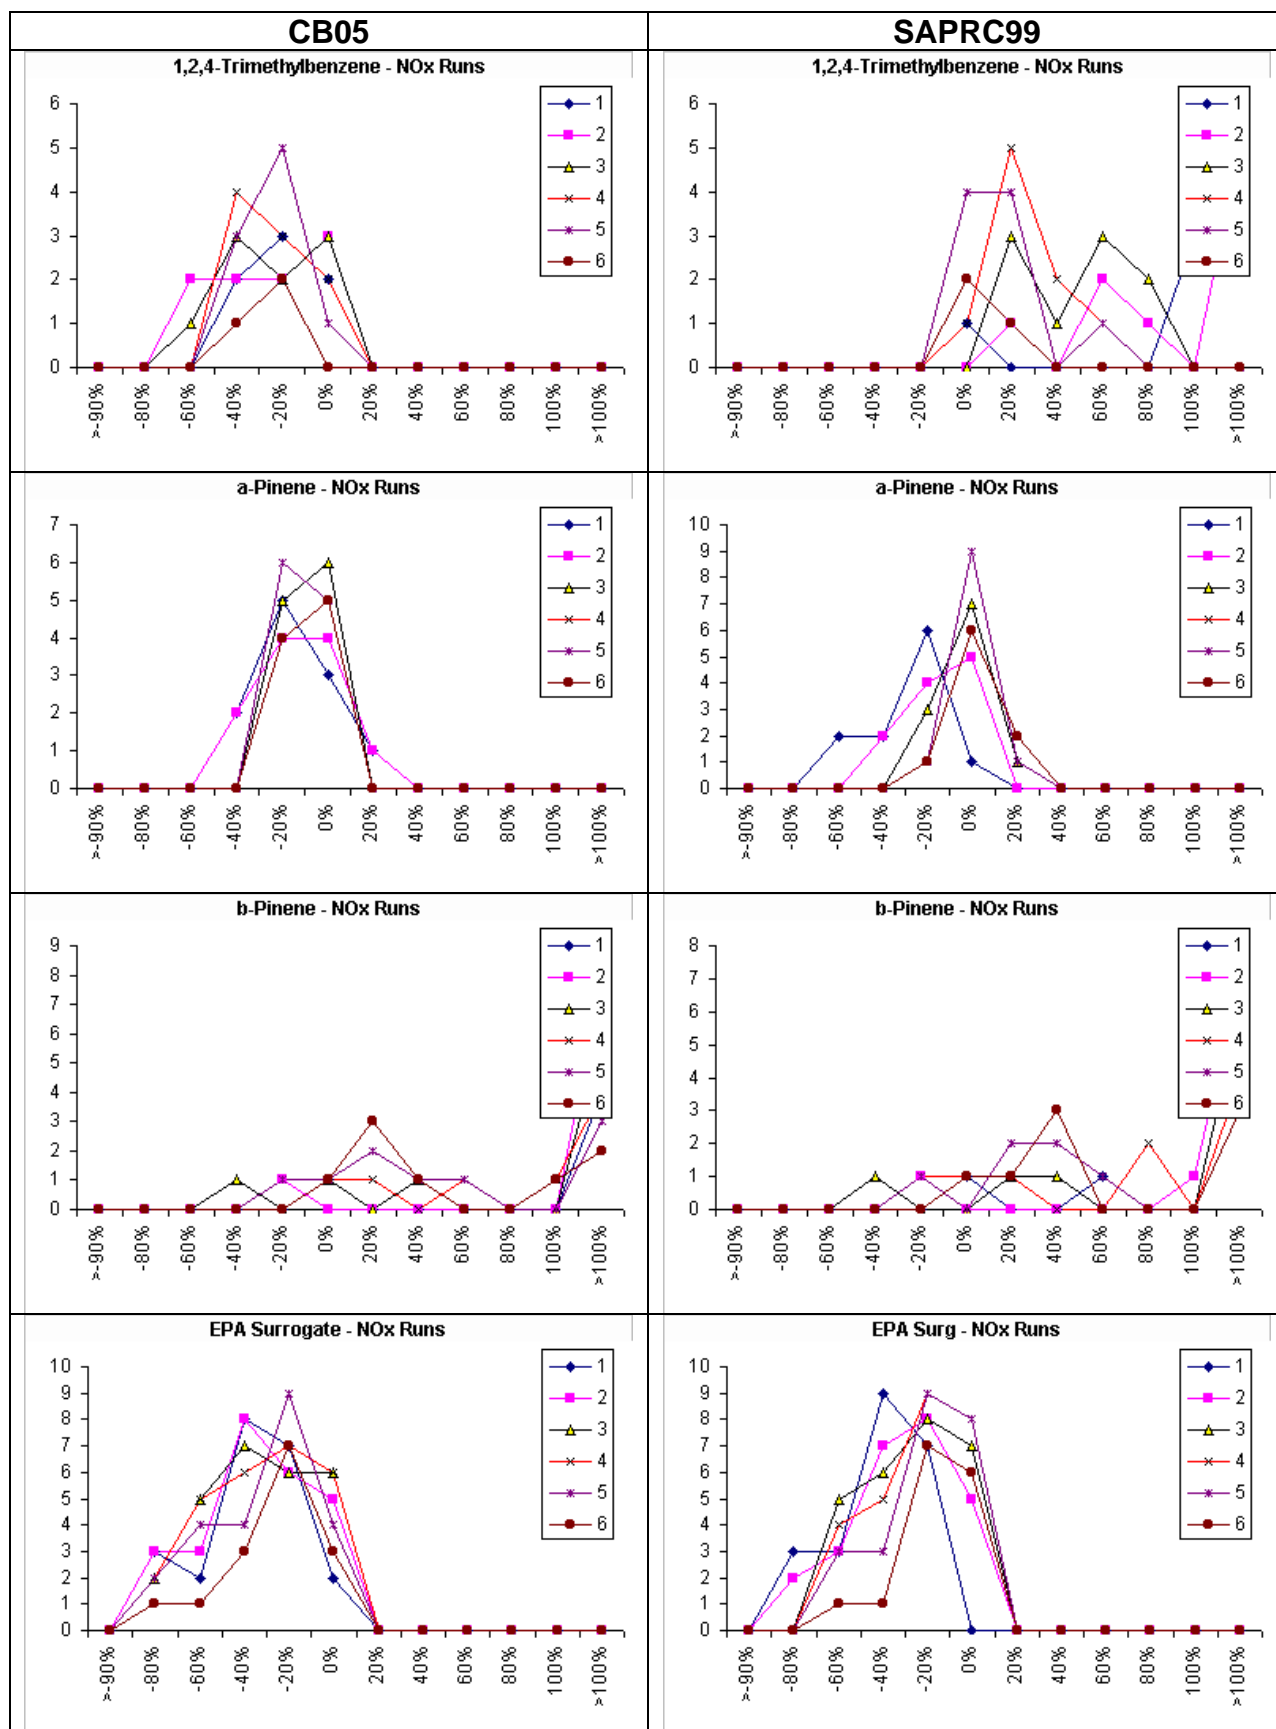

**Figure 4-16.** (continued). Bias in oxidant production ( $O_3$ -NO) at hours 1-6 in UCR chamber experiments for the CB05 and SAPRC99 mechanisms, by compound.

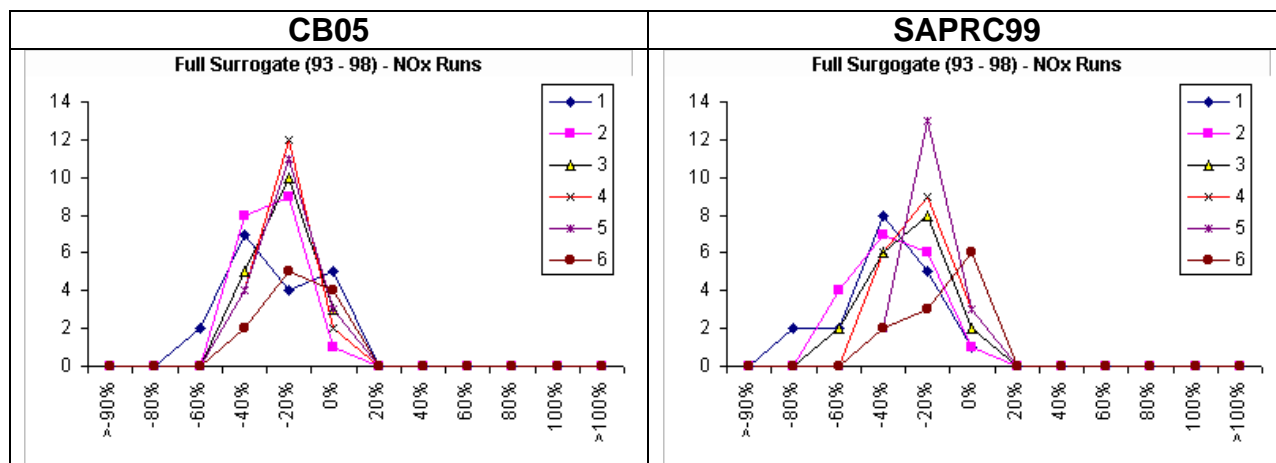

**Figure 4-16.** (concluded). Bias in oxidant production ( $O_3$ -NO) at hours 1-6 in UCR chamber experiments for the CB05 and SAPRC99 mechanisms, by compound.

## 5. SUMMARY AND RECOMMENDATIONS

The Carbon Bond mechanism has been updated for use in EPA atmospheric modeling studies. The starting point for this study was version 4 of the Carbon Bond mechanism (CB4) developed in the late 1980s (Gery et al., 1989) as updated in the mid 1990s for EPA's "OTAG" ozone transport assessment study. The new version of the Carbon Bond mechanism is called CB05 because it was developed in 2005.

The CB05 is a condensed mechanism of atmospheric oxidant chemistry that provides a basis for computer modeling studies of ozone, particulate matter (PM), visibility, acid deposition and air toxics issues. Updates in CB05 compared to earlier CB4 mechanisms are:

- Updated rate constants based on recent (2003 – 2005) IUPAC and NASA evaluations.
- An extended inorganic reaction set for urban to remote tropospheric conditions.
- NO<sub>x</sub> recycling reactions to represent the fate of NO<sub>x</sub> over multiple days.
- Explicit organic chemistry for methane and ethane.
- Explicit methylperoxy radical, methyl hydroperoxide and formic acid.
- Lumped higher organic peroxides, organic acids and peracids.
- Internal olefin (R-HC=CH-R) species called IOLE.
- Higher aldehyde species ALDX making ALD2 explicitly acetaldehyde.
- Higher peroxyacyl nitrate species from ALDX called PANX.
- Lumped terpene species called TERP.
- Optional mechanism extension for reactive chlorine chemistry.
- Optional extended mechanism with explicit reactions for air-toxics.

The core CB05 mechanism has 51 species and 156 reactions. The CB05 was evaluated against smog chamber data from the Universities of North Carolina (UNC) and California at Riverside (UCTR). An updated wall reaction mechanism was developed for the UNC chamber that improved performance in experiments that are sensitive to chamber radical sources. The addition of higher aldehyde (ALDX) and internal olefin (IOLE) species to CB05 improved mechanism performance for simulating these species groups. The addition of organic peroxide species improves the simulation of oxidants that are involved in PM sulfate formation. The addition of explicit methylperoxy radical improves the simulation of hydrogen peroxide under low NO<sub>x</sub> conditions.

Two CB05 mechanism extensions were developed. The optional reactive chlorine chemistry mechanism can be used in conjunction with the CB05 core mechanism to model the impact of Cl<sub>2</sub> and/or HOCl emissions on oxidant formation and VOC decay rates. The optional explicit species extension can be used in conjunction with the CB05 (or another) core mechanism to model the following toxic species: primary formaldehyde, primary acetaldehyde, 1,3-butadiene, primary and secondary acrolein. Other optional explicit species are toluene, o-xylene, m-xylene, p-xylene, alpha-pinene and beta-pinene. These include the main precursors to secondary organic aerosol (SOA) and could be used as the basis for refined modeling approach for SOA that is independent of the core mechanism selected (e.g., CB4, CB05 or SAPRC99).

## Recommendations

- Terpene experiments from UNC should be implemented in the UNC “Morpho” chamber simulation software and used to evaluate, and possibly update, the CB05 terpene mechanism.
- The SAPRC99 mechanism should be evaluated against UNC chamber experiments using the Morpho software and updated UNC chamber wall mechanisms.
- There should be a comparative study of UCR and UNC chamber experiments, especially for aromatics, to understand apparent chamber differences.

## REFERENCES

- Adelman Z.E., 1999. "A Reevaluation Of The Carbon Bond-IV Photochemical Mechanism." School of Public Health, University of North Carolina, Chapel Hill, North Carolina,
- Canosa-Mas, C.E., S.J. Smith, S.J. Waygood, and R.P. Wayne. 1991. "Study of the temperature dependence of the reaction of the nitrate radical with propene." *J. Chem. Soc. Faraday Trans.*, 87, 3473-3478.
- Carter, W.P.L. 2000. "Programs and Files Implementing the SAPRC-99 Mechanism and its Associated Emissions Processing Procedures for Models-3 and Other Regional Models." January. <http://pah.cert.ucr.edu/~carter/SAPRC99.htm>
- Carter W. P. L. 1996. "Condensed atmospheric photooxidation mechanisms for isoprene." *Atmospheric Environment*, 30, 4275-4290.
- Carter, W. P. L., and R. Atkinson. 1996. "Development and evaluation of a detailed mechanism for the atmospheric reactions of isoprene and NO<sub>x</sub>." *Int. J. Chem. Kinet*, 28, 497-530.
- Carter, W. P. L., D.R. Cocker III, D. R. Fitz, I.L. Malkina, K. Bumiller, C. G. Sauer, J.T. Pisano, C. Bufalino, and C. Song. 2005. "A new environmental chamber for evaluation of gas-phase chemical mechanisms and secondary aerosol formation." Accepted for publication in *Atmospheric Environment*, July 15, 2005.
- Cvetanovic, R.J. 1987. "Evaluated chemical kinetic data for the reactions of atomic oxygen O(3P) with unsaturated hydrocarbons." *J. Phys. Chem. Ref. Data*, 16, 261.
- Dodge, M.C. 1991. "Updating of the CB4 Mechanism." Memorandum to Shao-Hang Chu, Environmental Protection Agency, Office of Air Quality Planning and Standards, Research Triangle Park, NC. March.
- Gery, M.W., G.Z. Whitten, J.P. Killus, and M.C. Dodge. 1989. "A Photochemical Kinetics Mechanism for Urban and Regional Scale Computer Modeling." *J. Geophys. Res.*, 94, 925-956.
- Herron, J.T. 1988 "Evaluated chemical kinetic data for the reactions of atomic oxygen O(3P) with saturated organic compounds in the gas phase" *J. Phys. Chem. Ref. Data*, 17, 967.
- Hjorth, J., J. Notholt, and G. Restelli 1992 "A spectroscopic study of the equilibrium NO<sub>2</sub> + NO<sub>3</sub> + M = N<sub>2</sub>O<sub>5</sub> + M and the kinetics of the O<sub>3</sub>/N<sub>2</sub>O<sub>5</sub>/NO<sub>3</sub>/NO<sub>2</sub>/air system" *Int. J. Chem. Kinet.*, 24, 51-65.
- IUPAC. 2005. R. Atkinson, D.L. Baulch, R.A. Cox, J.N. Crowley, R.F. Hampson, R.G. Hynes, M.E. Jenkin, J.A. Kerr, M.J. Rossi, and J. Troe. "Evaluated kinetic and photochemical data for atmospheric chemistry - IUPAC subcommittee on gas kinetic data evaluation for atmospheric chemistry." July 2005 web version available from <http://www.iupac-kinetic.ch.cam.ac.uk/index.html>

- Jeffries, H.E., I. Voicu, and K. Sexton. 2002. "Experimental Tests of Reactivity and Re-evaluation of The Carbon Bond Four Photochemical Reaction Mechanism." Final report for Cooperative Agreement No. R828906, U.S. EPA, RTP, NC.
- Kaiser, E.W. and C.H. Wu. 1977. "A Kinetic study of the Gas Phase Formation and Decomposition Reactions of Nitrous Acid." *J. Phys Chem.* 81, 1701-1706.
- Ligocki, M. P. and G. Z. Whitten. 1992. "Modeling of Air Toxics with the Urban Airshed Model." Presented at the Air and Waste Management Association 85th Annual Meeting and Exhibition, Kansas City, Missouri. Paper 92-84.12.
- Ligocki, M.P., R.R. Schulhof, R.E. Jackson, M.M. Jimenez, G.Z. Whitten, G.M. Wilson, T.C. Myers, and J.L. Fieber. 1992. "Modeling the Effects of Reformulated Gasolines on Ozone and Toxics Concentrations in the Baltimore and Houston Areas," Final Report to U.S. EPA, Systems Applications International, San Rafael, CA.
- Luo, D., J.A. Pierce, J.L. Malkina, and W.P.L. Carter. 1996. "Rate Constants for the Reactions of O(3P) with Selected Monoterpenes." *Int. J. Chem. Kinet.*, 28, 1-8.
- Morris, R. E. and T. C. Myers. 1990. "User's Guide for the Urban Airshed Model. Volume I: User's Manual for UAM (CB-IV)." Prepared for the U.S. Environmental Protection Agency (EPA-450/4-90-007a), Systems Applications International, San Rafael, CA.
- NASA/JPL 2003. S.P. Sander, R.R. Friedl, D. M. Golden, M. J. Kurylo, R. E. Huie, V. L. Orkin, G. K. Moortgat, A. R. Ravishankara, C. E. Kolb, M. J. Molina, and B. J. Finlayson-Pitts. Chemical Kinetics and Photochemical Data for use in Atmospheric Studies, Evaluation Number 14. NASA Jet Propulsion Laboratory. February. Available from <http://jpldataeval.jpl.nasa.gov/download.html>.
- Novelli, P.C., P.M. Lang, K.A. Masarie, D.F. Hurst, R. Myers, and J.W. Elkins. 1999. "Molecular hydrogen in the troposphere: global distribution and budget." *J. Geophys. Res.* 104, 30,427-30,444.
- Odum, J.R., T.P.W. Jungkamp, R.J. Griffin, R.C. Flagan and J.H. Seinfeld. 1997. "The Atmospheric Aerosol-Forming Potential of Whole Gasoline Vapor." *Science*, 276, 96-99. See also *Environmental Science & Technology*, 31, 1890-1897.
- Tanaka P.L., D.T. Allen, E.C. McDonald-Buller, S. Chang, Y. Kimura, G. Yarwood and J.D. Neece. 2003. "Development of a chlorine mechanism for use in the carbon bond IV chemistry model." *Journal of Geophysical Research*. Vol. 108(D4), 4145.
- Troe J., 2001. "Analysis of the temperature and pressure dependence of the reaction  $\text{HO} + \text{NO}_2 + \text{M} \rightarrow \text{HONO}_2 + \text{M}$ ." *Int. J. Chem. Kinet.*, 33, 878-889.
- Tuazon, E.C, W.P.L. Carter, and R. Atkinson. 1991. "Thermal decomposition of peroxyacetyl nitrate and reactions of acetyl peroxy radicals with NO and NO<sub>2</sub> over the temperature range 283-313 K." *J. Phys. Chem.*, 95, 2434-2437.

- Tyndall, G.S., R.A. Cox, C. Granier, R. Lesclaux, G.K. Moortgat, M.J. Pilling, A.R. Ravishankara, T.J. Wallington. 2001. "Atmospheric chemistry of small organic peroxy radicals." *Journal of Geophysical Research*, 106(D11), 12157-12182.
- Wahner A., T.F. Mentel, and M. Sohn. 1998. "Gas-phase reaction of N<sub>2</sub>O<sub>5</sub> with water vapor: importance of heterogeneous hydrolysis of N<sub>2</sub>O<sub>5</sub> and surface desorption of HNO<sub>3</sub> in a large teflon chamber." *Geophysical Research Letters*, 25, 2169-2172.
- Whitten, G.Z. and H. Hogo. 1986. "Guidelines for Using OZIPM-4 with CBM-4 or Optional Mechanisms. Volume 2: Computer Code." Report prepared for the U.S. Environmental Protection Agency.
- Whitten, G.Z. et al. 1986. "Guidelines for Using OZIPM-4 with CBM-4 or Optional Mechanisms. Volume 1: Description of the Ozone Isopleth Plotting Package, Version 4." Report prepared for the U.S. Environmental Protection Agency.
- Whitten, G.Z., H.P. Duel, C.S. Burton and J.L. Haney. 1996. "Overview of the implementation of an updated isoprene chemistry mechanism in CB4/UAM-V." Memorandum from Systems Application International, San Rafael, CA. June.
- Yarwood, G. and S. Burton. 1993. "An update to the radical-radical termination reactions in the CBM-IV." Memorandum from Systems Application International, San Rafael, CA. December.
- Yarwood G., P. D. Maker and H. Niki. 1991. "Kinetic and IR spectroscopic studies of formyl bromide (HCOBr) formed via the reaction  $\text{HCO} + \text{Br}_2 \rightarrow \text{HCOBr} + \text{Br}$ ." *J. Phys. Chem.*, 95(12), 4773-4777.
- Yarwood G., N. Peng and H. Niki. 1992. "FTIR study of the Cl and Br atom initiated oxidation of ethane." *Int. J. Chem. Kinet.*, 24:369.
- Yarwood, G., N. Peng and H. Niki. 1991. "FTIR study of the mechanism of the Cl and Br atom initiated oxidation of acetylene." *J. Phys. Chem.*, 95(19), 7330-7337.
- Yarwood, G., G. Z. Whitten and S. Rao. 2005. "Updates to the Carbon Bond 4 Photochemical Mechanism." Report prepared for the Lake Michigan Air Directors Consortium, Des Plaines, IL.
- Zaveri, R.A., L.K. Peters. 1999. "A new lumped structure photochemical mechanism for large-scale applications." *Journal of Geophysical Research*, 104, 30,387-30,400.

## **Appendix A**

### **Assignments from VOC Species to CB05 Model Species**

Table 1. Matrix of Assignments from Real Compounds to Carbon Bond 05 (CB05) Model Species

| name                            | NASN | PAR  | OLE | TOL | XYL | FORM | ALD2 | ETH | ISOP | MEOH | ETOH | NR   | CH4 | ETHA | IOLE | ALDX | TERP | MW     | # carbons |
|---------------------------------|------|------|-----|-----|-----|------|------|-----|------|------|------|------|-----|------|------|------|------|--------|-----------|
| <b>ALKANES - examples</b>       |      |      |     |     |     |      |      |     |      |      |      |      |     |      |      |      |      |        |           |
| methane                         | 0    | 0    | 0   | 0   | 0   | 0    | 0    | 0   | 0    | 0    | 0    | 0    | 1   | 0    | 0    | 0    | 0    | 16.04  | 1         |
| propane                         | 0    | 1.5  | 0   | 0   | 0   | 0    | 0    | 0   | 0    | 0    | 0    | 1.5  | 0   | 0    | 0    | 0    | 0    | 44.1   | 1.5       |
| ethane                          | 0    | 0    | 0   | 0   | 0   | 0    | 0    | 0   | 0    | 0    | 0    | 0    | 0   | 1    | 0    | 0    | 0    | 30.07  | 2         |
| n-butane                        | 0    | 4    | 0   | 0   | 0   | 0    | 0    | 0   | 0    | 0    | 0    | 0    | 0   | 0    | 0    | 0    | 0    | 58.12  | 4         |
| 2,2-dimethylpropane             | 0    | 4    | 0   | 0   | 0   | 0    | 0    | 0   | 0    | 0    | 0    | 1    | 0   | 0    | 0    | 0    | 0    | 72.15  | 4         |
| 2-methylpropane; isobutane      | 0    | 4    | 0   | 0   | 0   | 0    | 0    | 0   | 0    | 0    | 0    | 0    | 0   | 0    | 0    | 0    | 0    | 58.12  | 4         |
| 2-methylpropane; isobutane      | 0    | 4    | 0   | 0   | 0   | 0    | 0    | 0   | 0    | 0    | 0    | 0    | 0   | 0    | 0    | 0    | 0    | 58.12  | 4         |
| n-pentane                       | 0    | 5    | 0   | 0   | 0   | 0    | 0    | 0   | 0    | 0    | 0    | 0    | 0   | 0    | 0    | 0    | 0    | 72.15  | 5         |
| 2-methyl-butane                 | 0    | 5    | 0   | 0   | 0   | 0    | 0    | 0   | 0    | 0    | 0    | 0    | 0   | 0    | 0    | 0    | 0    | 72.15  | 5         |
| 2,2-dimethylbutane              | 0    | 5    | 0   | 0   | 0   | 0    | 0    | 0   | 0    | 0    | 0    | 1    | 0   | 0    | 0    | 0    | 0    | 86.18  | 5         |
| isomers of pentane              | 0    | 5    | 0   | 0   | 0   | 0    | 0    | 0   | 0    | 0    | 0    | 0    | 0   | 0    | 0    | 0    | 0    | 72.15  | 5         |
| cyclopentane                    | 0    | 5    | 0   | 0   | 0   | 0    | 0    | 0   | 0    | 0    | 0    | 0    | 0   | 0    | 0    | 0    | 0    | 70.14  | 5         |
| c5 paraffin                     | 0    | 5    | 0   | 0   | 0   | 0    | 0    | 0   | 0    | 0    | 0    | 0    | 0   | 0    | 0    | 0    | 0    | 72.15  | 5         |
| dimethylbutane                  | 0    | 5.75 | 0   | 0   | 0   | 0    | 0    | 0   | 0    | 0    | 0    | 0.25 | 0   | 0    | 0    | 0    | 0    | 86.18  | 5.75      |
| isomers of hexane               | 0    | 5.83 | 0   | 0   | 0   | 0    | 0    | 0   | 0    | 0    | 0    | 0.17 | 0   | 0    | 0    | 0    | 0    | 86.18  | 5.83      |
| 2,3-dimethylbutane              | 0    | 6    | 0   | 0   | 0   | 0    | 0    | 0   | 0    | 0    | 0    | 0    | 0   | 0    | 0    | 0    | 0    | 86.18  | 6         |
| cyclohexane                     | 0    | 6    | 0   | 0   | 0   | 0    | 0    | 0   | 0    | 0    | 0    | 0    | 0   | 0    | 0    | 0    | 0    | 84.16  | 6         |
| 1,6-Diisocyanatohexane          | 0    | 6    | 0   | 0   | 0   | 0    | 0    | 0   | 0    | 0    | 0    | 2    | 0   | 0    | 0    | 0    | 0    | 168.2  | 6         |
| 2-methylpentane                 | 0    | 6    | 0   | 0   | 0   | 0    | 0    | 0   | 0    | 0    | 0    | 0    | 0   | 0    | 0    | 0    | 0    | 86.18  | 6         |
| 3-methylpentane                 | 0    | 6    | 0   | 0   | 0   | 0    | 0    | 0   | 0    | 0    | 0    | 0    | 0   | 0    | 0    | 0    | 0    | 86.18  | 6         |
| methylcyclopentane              | 0    | 6    | 0   | 0   | 0   | 0    | 0    | 0   | 0    | 0    | 0    | 0    | 0   | 0    | 0    | 0    | 0    | 84.16  | 6         |
| methylpentane                   | 0    | 6    | 0   | 0   | 0   | 0    | 0    | 0   | 0    | 0    | 0    | 0    | 0   | 0    | 0    | 0    | 0    | 86.18  | 6         |
| 3,3-dimethylpentane             | 0    | 6    | 0   | 0   | 0   | 0    | 0    | 0   | 0    | 0    | 0    | 1    | 0   | 0    | 0    | 0    | 0    | 100.21 | 6         |
| n-hexane                        | 0    | 6    | 0   | 0   | 0   | 0    | 0    | 0   | 0    | 0    | 0    | 0    | 0   | 0    | 0    | 0    | 0    | 86.18  | 6         |
| dimethylpentane                 | 0    | 6.75 | 0   | 0   | 0   | 0    | 0    | 0   | 0    | 0    | 0    | 0.25 | 0   | 0    | 0    | 0    | 0    | 100.21 | 6.75      |
| c7 paraffins                    | 0    | 6.81 | 0   | 0   | 0   | 0    | 0    | 0   | 0    | 0    | 0    | 0.19 | 0   | 0    | 0    | 0    | 0    | 100.21 | 6.81      |
| isomers of heptane              | 0    | 6.81 | 0   | 0   | 0   | 0    | 0    | 0   | 0    | 0    | 0    | 0.19 | 0   | 0    | 0    | 0    | 0    | 100.21 | 6.81      |
| n-octane                        | 0    | 7    | 0   | 0   | 0   | 0    | 0    | 0   | 0    | 0    | 0    | 1    | 0   | 0    | 0    | 0    | 0    | 114.23 | 7         |
| c7 cycloparaffins               | 0    | 7    | 0   | 0   | 0   | 0    | 0    | 0   | 0    | 0    | 0    | 0    | 0   | 0    | 0    | 0    | 0    | 98.19  | 7         |
| methyl hexane                   | 0    | 7    | 0   | 0   | 0   | 0    | 0    | 0   | 0    | 0    | 0    | 0    | 0   | 0    | 0    | 0    | 0    | 100.21 | 7         |
| n-decane                        | 0    | 7    | 0   | 0   | 0   | 0    | 0    | 0   | 0    | 0    | 0    | 3    | 0   | 0    | 0    | 0    | 0    | 142.29 | 7         |
| n-heptane                       | 0    | 7    | 0   | 0   | 0   | 0    | 0    | 0   | 0    | 0    | 0    | 0    | 0   | 0    | 0    | 0    | 0    | 100.21 | 7         |
| methylcyclohexane               | 0    | 7    | 0   | 0   | 0   | 0    | 0    | 0   | 0    | 0    | 0    | 0    | 0   | 0    | 0    | 0    | 0    | 98.19  | 7         |
| 2,4-dimethylpentane             | 0    | 7    | 0   | 0   | 0   | 0    | 0    | 0   | 0    | 0    | 0    | 0    | 0   | 0    | 0    | 0    | 0    | 100.21 | 7         |
| 2,2,4-trimethylpentane          | 0    | 7    | 0   | 0   | 0   | 0    | 0    | 0   | 0    | 0    | 0    | 1    | 0   | 0    | 0    | 0    | 0    | 114.23 | 7         |
| 2,3-dimethylpentane             | 0    | 7    | 0   | 0   | 0   | 0    | 0    | 0   | 0    | 0    | 0    | 0    | 0   | 0    | 0    | 0    | 0    | 100.21 | 7         |
| 2,3,3-trimethylpentane          | 0    | 7    | 0   | 0   | 0   | 0    | 0    | 0   | 0    | 0    | 0    | 1    | 0   | 0    | 0    | 0    | 0    | 114.23 | 7         |
| dimethylcyclopentane            | 0    | 7    | 0   | 0   | 0   | 0    | 0    | 0   | 0    | 0    | 0    | 0    | 0   | 0    | 0    | 0    | 0    | 98.19  | 7         |
| ethylcyclopentane               | 0    | 7    | 0   | 0   | 0   | 0    | 0    | 0   | 0    | 0    | 0    | 0    | 0   | 0    | 0    | 0    | 0    | 98.19  | 7         |
| n-nonane                        | 0    | 7    | 0   | 0   | 0   | 0    | 0    | 0   | 0    | 0    | 0    | 2    | 0   | 0    | 0    | 0    | 0    | 128.26 | 7         |
| 2-methylhexane                  | 0    | 7    | 0   | 0   | 0   | 0    | 0    | 0   | 0    | 0    | 0    | 0    | 0   | 0    | 0    | 0    | 0    | 100.21 | 7         |
| 2,2-dimethylhexane              | 0    | 7    | 0   | 0   | 0   | 0    | 0    | 0   | 0    | 0    | 0    | 1    | 0   | 0    | 0    | 0    | 0    | 114.23 | 7         |
| 3-methylhexane                  | 0    | 7    | 0   | 0   | 0   | 0    | 0    | 0   | 0    | 0    | 0    | 0    | 0   | 0    | 0    | 0    | 0    | 100.21 | 7         |
| trimethylpentane                | 0    | 7.33 | 0   | 0   | 0   | 0    | 0    | 0   | 0    | 0    | 0    | 0.67 | 0   | 0    | 0    | 0    | 0    | 114.23 | 7.33      |
| isomers of octane (c8 paraffin) | 0    | 7.62 | 0   | 0   | 0   | 0    | 0    | 0   | 0    | 0    | 0    | 0.38 | 0   | 0    | 0    | 0    | 0    | 114.23 | 7.62      |

**Table 1. Matrix of Assignments from Real Compounds to Carbon Bond 05 (CB05) Model Species**

| name                             | NASN | PAR  | OLE | TOL | XYL | FORM | ALD2 | ETH | ISOP | MEOH | ETOH | NR   | CH4 | ETHA | IOLE | ALDX | TERP | MW     | # carbons |
|----------------------------------|------|------|-----|-----|-----|------|------|-----|------|------|------|------|-----|------|------|------|------|--------|-----------|
| methylnonane                     | 0    | 7.75 | 0   | 0   | 0   | 0    | 0    | 0   | 0    | 0    | 0    | 2.25 | 0   | 0    | 0    | 0    | 0    | 142.29 | 7.75      |
| dimethylhexanes                  | 0    | 7.83 | 0   | 0   | 0   | 0    | 0    | 0   | 0    | 0    | 0    | 0.17 | 0   | 0    | 0    | 0    | 0    | 114.23 | 7.83      |
| c8 cycloparaffins                | 0    | 8    | 0   | 0   | 0   | 0    | 0    | 0   | 0    | 0    | 0    | 0    | 0   | 0    | 0    | 0    | 0    | 112.22 | 8         |
| 3-methylheptane                  | 0    | 8    | 0   | 0   | 0   | 0    | 0    | 0   | 0    | 0    | 0    | 0    | 0   | 0    | 0    | 0    | 0    | 114.23 | 8         |
| 2-methylheptane                  | 0    | 8    | 0   | 0   | 0   | 0    | 0    | 0   | 0    | 0    | 0    | 0    | 0   | 0    | 0    | 0    | 0    | 114.23 | 8         |
| 4-methylheptane                  | 0    | 8    | 0   | 0   | 0   | 0    | 0    | 0   | 0    | 0    | 0    | 0    | 0   | 0    | 0    | 0    | 0    | 114.23 | 8         |
| methylheptane                    | 0    | 8    | 0   | 0   | 0   | 0    | 0    | 0   | 0    | 0    | 0    | 0    | 0   | 0    | 0    | 0    | 0    | 114.23 | 8         |
| n-undecane                       | 0    | 8    | 0   | 0   | 0   | 0    | 0    | 0   | 0    | 0    | 0    | 3    | 0   | 0    | 0    | 0    | 0    | 156.31 | 8         |
| n-dodecane                       | 0    | 8    | 0   | 0   | 0   | 0    | 0    | 0   | 0    | 0    | 0    | 4    | 0   | 0    | 0    | 0    | 0    | 170.34 | 8         |
| ethylcyclohexane                 | 0    | 8    | 0   | 0   | 0   | 0    | 0    | 0   | 0    | 0    | 0    | 0    | 0   | 0    | 0    | 0    | 0    | 112.22 | 8         |
| cis-1,4-dimethylcyclohexane      | 0    | 8    | 0   | 0   | 0   | 0    | 0    | 0   | 0    | 0    | 0    | 0    | 0   | 0    | 0    | 0    | 0    | 112.22 | 8         |
| 2,3,4-trimethylpentane           | 0    | 8    | 0   | 0   | 0   | 0    | 0    | 0   | 0    | 0    | 0    | 0    | 0   | 0    | 0    | 0    | 0    | 114.23 | 8         |
| cis-1-methyl-3-ethylcyclopentane | 0    | 8    | 0   | 0   | 0   | 0    | 0    | 0   | 0    | 0    | 0    | 0    | 0   | 0    | 0    | 0    | 0    | 112.22 | 8         |
| isopropylcyclopentane            | 0    | 8    | 0   | 0   | 0   | 0    | 0    | 0   | 0    | 0    | 0    | 0    | 0   | 0    | 0    | 0    | 0    | 112.22 | 8         |
| trimethylcyclopentane            | 0    | 8    | 0   | 0   | 0   | 0    | 0    | 0   | 0    | 0    | 0    | 0    | 0   | 0    | 0    | 0    | 0    | 112.22 | 8         |
| c8 alkyl cyclohexanes            | 0    | 8    | 0   | 0   | 0   | 0    | 0    | 0   | 0    | 0    | 0    | 0    | 0   | 0    | 0    | 0    | 0    | 112.22 | 8         |
| dimethylcyclohexanes             | 0    | 8    | 0   | 0   | 0   | 0    | 0    | 0   | 0    | 0    | 0    | 0    | 0   | 0    | 0    | 0    | 0    | 112.22 | 8         |
| 2,2,4-trimethylhexane            | 0    | 8    | 0   | 0   | 0   | 0    | 0    | 0   | 0    | 0    | 0    | 1    | 0   | 0    | 0    | 0    | 0    | 128.26 | 8         |
| 2,4-dimethylhexane               | 0    | 8    | 0   | 0   | 0   | 0    | 0    | 0   | 0    | 0    | 0    | 0    | 0   | 0    | 0    | 0    | 0    | 114.23 | 8         |
| 2,5-dimethylhexane               | 0    | 8    | 0   | 0   | 0   | 0    | 0    | 0   | 0    | 0    | 0    | 0    | 0   | 0    | 0    | 0    | 0    | 114.23 | 8         |
| 2,3-dimethylhexane               | 0    | 8    | 0   | 0   | 0   | 0    | 0    | 0   | 0    | 0    | 0    | 0    | 0   | 0    | 0    | 0    | 0    | 114.23 | 8         |
| ethylhexane                      | 0    | 8    | 0   | 0   | 0   | 0    | 0    | 0   | 0    | 0    | 0    | 0    | 0   | 0    | 0    | 0    | 0    | 114.23 | 8         |
| 2,2,5-trimethylhexane            | 0    | 8    | 0   | 0   | 0   | 0    | 0    | 0   | 0    | 0    | 0    | 1    | 0   | 0    | 0    | 0    | 0    | 128.26 | 8         |
| cis-bicyclo[3.3.0]octane         | 0    | 8    | 0   | 0   | 0   | 0    | 0    | 0   | 0    | 0    | 0    | 0    | 0   | 0    | 0    | 0    | 0    | 110.2  | 8         |
| aliphatics                       | 0    | 8.08 | 0   | 0   | 0   | 0    | 0    | 0   | 0    | 0    | 0    | 0.62 | 0   | 0    | 0    | 0    | 0    | 122.89 | 8.08      |
| diethylcyclohexane               | 0    | 8.5  | 0   | 0   | 0   | 0    | 0    | 0   | 0    | 0    | 0    | 1.5  | 0   | 0    | 0    | 0    | 0    | 140.27 | 8.5       |
| isomers of nonane (c9 paraffin)  | 0    | 8.75 | 0   | 0   | 0   | 0    | 0    | 0   | 0    | 0    | 0    | 0.25 | 0   | 0    | 0    | 0    | 0    | 128.26 | 8.75      |
| trimethylhexanes                 | 0    | 8.8  | 0   | 0   | 0   | 0    | 0    | 0   | 0    | 0    | 0    | 0.2  | 0   | 0    | 0    | 0    | 0    | 128.26 | 8.8       |
| propenylcyclohexane              | 0    | 7    | 1   | 0   | 0   | 0    | 0    | 0   | 0    | 0    | 0    | 0    | 0   | 0    | 0    | 0    | 0    | 124.23 | 9         |
| methyloctanes                    | 0    | 9    | 0   | 0   | 0   | 0    | 0    | 0   | 0    | 0    | 0    | 0    | 0   | 0    | 0    | 0    | 0    | 128.26 | 9         |
| c9 cycloparaffins                | 0    | 9    | 0   | 0   | 0   | 0    | 0    | 0   | 0    | 0    | 0    | 0    | 0   | 0    | 0    | 0    | 0    | 126.24 | 9         |
| methyldodecanes                  | 0    | 9    | 0   | 0   | 0   | 0    | 0    | 0   | 0    | 0    | 0    | 4    | 0   | 0    | 0    | 0    | 0    | 184.37 | 9         |
| 2,4-dimethylheptane              | 0    | 9    | 0   | 0   | 0   | 0    | 0    | 0   | 0    | 0    | 0    | 0    | 0   | 0    | 0    | 0    | 0    | 128.26 | 9         |
| 3,5-dimethylheptane              | 0    | 9    | 0   | 0   | 0   | 0    | 0    | 0   | 0    | 0    | 0    | 0    | 0   | 0    | 0    | 0    | 0    | 128.26 | 9         |
| 2,5-dimethylheptane              | 0    | 9    | 0   | 0   | 0   | 0    | 0    | 0   | 0    | 0    | 0    | 0    | 0   | 0    | 0    | 0    | 0    | 128.26 | 9         |
| 2,3-dimethylheptane              | 0    | 9    | 0   | 0   | 0   | 0    | 0    | 0   | 0    | 0    | 0    | 0    | 0   | 0    | 0    | 0    | 0    | 128.26 | 9         |
| ethylheptane                     | 0    | 9    | 0   | 0   | 0   | 0    | 0    | 0   | 0    | 0    | 0    | 0    | 0   | 0    | 0    | 0    | 0    | 128.26 | 9         |
| ethylbicycloheptane              | 0    | 9    | 0   | 0   | 0   | 0    | 0    | 0   | 0    | 0    | 0    | 0    | 0   | 0    | 0    | 0    | 0    | 124.23 | 9         |
| dimethylheptanes                 | 0    | 9    | 0   | 0   | 0   | 0    | 0    | 0   | 0    | 0    | 0    | 0    | 0   | 0    | 0    | 0    | 0    | 128.26 | 9         |
| 2-methyloctane                   | 0    | 9    | 0   | 0   | 0   | 0    | 0    | 0   | 0    | 0    | 0    | 0    | 0   | 0    | 0    | 0    | 0    | 128.26 | 9         |
| 3-methyloctane                   | 0    | 9    | 0   | 0   | 0   | 0    | 0    | 0   | 0    | 0    | 0    | 0    | 0   | 0    | 0    | 0    | 0    | 128.26 | 9         |
| 4-methyloctane                   | 0    | 9    | 0   | 0   | 0   | 0    | 0    | 0   | 0    | 0    | 0    | 0    | 0   | 0    | 0    | 0    | 0    | 128.26 | 9         |
| propylcyclohexane                | 0    | 9    | 0   | 0   | 0   | 0    | 0    | 0   | 0    | 0    | 0    | 0    | 0   | 0    | 0    | 0    | 0    | 126.24 | 9         |
| 1,1,3-trimethylcyclohexane       | 0    | 9    | 0   | 0   | 0   | 0    | 0    | 0   | 0    | 0    | 0    | 0    | 0   | 0    | 0    | 0    | 0    | 126.24 | 9         |
| ethyltrimethylpentane            | 0    | 9    | 0   | 0   | 0   | 0    | 0    | 0   | 0    | 0    | 0    | 0    | 0   | 0    | 0    | 0    | 0    | 128.26 | 9         |
| tetramethylcyclopentane          | 0    | 9    | 0   | 0   | 0   | 0    | 0    | 0   | 0    | 0    | 0    | 0    | 0   | 0    | 0    | 0    | 0    | 126.24 | 9         |
| c9 alkyl cyclohexanes            | 0    | 9    | 0   | 0   | 0   | 0    | 0    | 0   | 0    | 0    | 0    | 0    | 0   | 0    | 0    | 0    | 0    | 126.24 | 9         |

**Table 1. Matrix of Assignments from Real Compounds to Carbon Bond 05 (CB05) Model Species**

| name                                             | NASN | PAR   | OLE | TOL | XYL | FORM | ALD2 | ETH | ISOP | MEOH | ETOH | NR   | CH4 | ETHA | IOLE | ALDX | TERP | MW     | # carbons |
|--------------------------------------------------|------|-------|-----|-----|-----|------|------|-----|------|------|------|------|-----|------|------|------|------|--------|-----------|
| ethylmethylcyclohexanes                          | 0    | 9     | 0   | 0   | 0   | 0    | 0    | 0   | 0    | 0    | 0    | 0    | 0   | 0    | 0    | 0    | 0    | 126.24 | 9         |
| 2,3,5-trimethylhexane                            | 0    | 9     | 0   | 0   | 0   | 0    | 0    | 0   | 0    | 0    | 0    | 0    | 0   | 0    | 0    | 0    | 0    | 128.26 | 9         |
| ethylmethylhexane                                | 0    | 9     | 0   | 0   | 0   | 0    | 0    | 0   | 0    | 0    | 0    | 0    | 0   | 0    | 0    | 0    | 0    | 128.26 | 9         |
| n-tridecane                                      | 0    | 9     | 0   | 0   | 0   | 0    | 0    | 0   | 0    | 0    | 0    | 4    | 0   | 0    | 0    | 0    | 0    | 184.37 | 9         |
| isopropylcyclohexane (2-methylethyl cyclohexane) | 0    | 9     | 0   | 0   | 0   | 0    | 0    | 0   | 0    | 0    | 0    | 0    | 0   | 0    | 0    | 0    | 0    | 126.24 | 9         |
| Bicyclo[4.3.0]nonane (octahydroindene)           | 0    | 9     | 0   | 0   | 0   | 0    | 0    | 0   | 0    | 0    | 0    | 0    | 0   | 0    | 0    | 0    | 0    | 124.23 | 9         |
| unk c9 paraffin                                  | 0    | 9     | 0   | 0   | 0   | 0    | 0    | 0   | 0    | 0    | 0    | 0    | 0   | 0    | 0    | 0    | 0    | 128.26 | 9         |
| methylcyclooctane                                | 0    | 9     | 0   | 0   | 0   | 0    | 0    | 0   | 0    | 0    | 0    | 0    | 0   | 0    | 0    | 0    | 0    | 126.24 | 9         |
| isomers of decane (c10 paraffins)                | 0    | 9.25  | 0   | 0   | 0   | 0    | 0    | 0   | 0    | 0    | 0    | 0.75 | 0   | 0    | 0    | 0    | 0    | 142.29 | 9.25      |
| c6 substituted cyclohexane                       | 0    | 9.33  | 0   | 0   | 0   | 0    | 0    | 0   | 0    | 0    | 0    | 2.67 | 0   | 0    | 0    | 0    | 0    | 168.32 | 9.33      |
| isomers of undecane (c11 paraffins)              | 0    | 9.5   | 0   | 0   | 0   | 0    | 0    | 0   | 0    | 0    | 0    | 1.5  | 0   | 0    | 0    | 0    | 0    | 156.31 | 9.5       |
| methyldecane                                     | 0    | 9.5   | 0   | 0   | 0   | 0    | 0    | 0   | 0    | 0    | 0    | 1.5  | 0   | 0    | 0    | 0    | 0    | 156.31 | 9.5       |
| dimethyloctanes                                  | 0    | 10    | 0   | 0   | 0   | 0    | 0    | 0   | 0    | 0    | 0    | 0    | 0   | 0    | 0    | 0    | 0    | 142.29 | 10        |
| n-tetradecane                                    | 0    | 10    | 0   | 0   | 0   | 0    | 0    | 0   | 0    | 0    | 0    | 4    | 0   | 0    | 0    | 0    | 0    | 198.39 | 10        |
| n-pentadecane                                    | 0    | 10    | 0   | 0   | 0   | 0    | 0    | 0   | 0    | 0    | 0    | 5    | 0   | 0    | 0    | 0    | 0    | 212.42 | 10        |
| isomers of tridecane (c13 paraffins)             | 0    | 10    | 0   | 0   | 0   | 0    | 0    | 0   | 0    | 0    | 0    | 3    | 0   | 0    | 0    | 0    | 0    | 184.37 | 10        |
| 2,4,5-trimethylheptane                           | 0    | 10    | 0   | 0   | 0   | 0    | 0    | 0   | 0    | 0    | 0    | 0    | 0   | 0    | 0    | 0    | 0    | 142.29 | 10        |
| methylethylheptane                               | 0    | 10    | 0   | 0   | 0   | 0    | 0    | 0   | 0    | 0    | 0    | 0    | 0   | 0    | 0    | 0    | 0    | 142.29 | 10        |
| trimethylheptanes                                | 0    | 10    | 0   | 0   | 0   | 0    | 0    | 0   | 0    | 0    | 0    | 0    | 0   | 0    | 0    | 0    | 0    | 142.29 | 10        |
| ethyloctane                                      | 0    | 10    | 0   | 0   | 0   | 0    | 0    | 0   | 0    | 0    | 0    | 0    | 0   | 0    | 0    | 0    | 0    | 142.29 | 10        |
| 2,4-dimethyloctane                               | 0    | 10    | 0   | 0   | 0   | 0    | 0    | 0   | 0    | 0    | 0    | 0    | 0   | 0    | 0    | 0    | 0    | 142.29 | 10        |
| 3,4-dimethyloctane                               | 0    | 10    | 0   | 0   | 0   | 0    | 0    | 0   | 0    | 0    | 0    | 0    | 0   | 0    | 0    | 0    | 0    | 142.29 | 10        |
| 2,3-dimethyloctane                               | 0    | 10    | 0   | 0   | 0   | 0    | 0    | 0   | 0    | 0    | 0    | 0    | 0   | 0    | 0    | 0    | 0    | 142.29 | 10        |
| 2,6-dimethyloctane                               | 0    | 10    | 0   | 0   | 0   | 0    | 0    | 0   | 0    | 0    | 0    | 0    | 0   | 0    | 0    | 0    | 0    | 142.29 | 10        |
| dimethylethylcyclohexane                         | 0    | 10    | 0   | 0   | 0   | 0    | 0    | 0   | 0    | 0    | 0    | 0    | 0   | 0    | 0    | 0    | 0    | 140.27 | 10        |
| isopropylmethylcyclohexane                       | 0    | 10    | 0   | 0   | 0   | 0    | 0    | 0   | 0    | 0    | 0    | 0    | 0   | 0    | 0    | 0    | 0    | 140.27 | 10        |
| butylcyclohexane                                 | 0    | 10    | 0   | 0   | 0   | 0    | 0    | 0   | 0    | 0    | 0    | 0    | 0   | 0    | 0    | 0    | 0    | 140.27 | 10        |
| cyclopentylcyclopentane                          | 0    | 10    | 0   | 0   | 0   | 0    | 0    | 0   | 0    | 0    | 0    | 0    | 0   | 0    | 0    | 0    | 0    | 138.25 | 10        |
| c10 alkyl cyclohexanes                           | 0    | 10    | 0   | 0   | 0   | 0    | 0    | 0   | 0    | 0    | 0    | 0    | 0   | 0    | 0    | 0    | 0    | 140.27 | 10        |
| methyl propylcyclohexanes                        | 0    | 10    | 0   | 0   | 0   | 0    | 0    | 0   | 0    | 0    | 0    | 0    | 0   | 0    | 0    | 0    | 0    | 140.27 | 10        |
| tetramethylhexane                                | 0    | 10    | 0   | 0   | 0   | 0    | 0    | 0   | 0    | 0    | 0    | 0    | 0   | 0    | 0    | 0    | 0    | 142.29 | 10        |
| decalins (mixed cis,trans)                       | 0    | 10    | 0   | 0   | 0   | 0    | 0    | 0   | 0    | 0    | 0    | 0    | 0   | 0    | 0    | 0    | 0    | 138.25 | 10        |
| c5 substituted cyclohexane                       | 0    | 10.25 | 0   | 0   | 0   | 0    | 0    | 0   | 0    | 0    | 0    | 0.75 | 0   | 0    | 0    | 0    | 0    | 154.3  | 10.25     |
| dimethylnonanes                                  | 0    | 10.4  | 0   | 0   | 0   | 0    | 0    | 0   | 0    | 0    | 0    | 0.6  | 0   | 0    | 0    | 0    | 0    | 156.31 | 10.4      |
| isomers of dodecane (c12 paraffins)              | 0    | 10.67 | 0   | 0   | 0   | 0    | 0    | 0   | 0    | 0    | 0    | 1.33 | 0   | 0    | 0    | 0    | 0    | 170.34 | 10.67     |
| isomers of tetradecane (c14 paraffins)           | 0    | 10.75 | 0   | 0   | 0   | 0    | 0    | 0   | 0    | 0    | 0    | 3.25 | 0   | 0    | 0    | 0    | 0    | 198.39 | 10.75     |
| trimethyloctanes                                 | 0    | 11    | 0   | 0   | 0   | 0    | 0    | 0   | 0    | 0    | 0    | 0    | 0   | 0    | 0    | 0    | 0    | 156.31 | 11        |
| hexadecane                                       | 0    | 11    | 0   | 0   | 0   | 0    | 0    | 0   | 0    | 0    | 0    | 5    | 0   | 0    | 0    | 0    | 0    | 226.45 | 11        |
| n-heptadecane                                    | 0    | 11    | 0   | 0   | 0   | 0    | 0    | 0   | 0    | 0    | 0    | 6    | 0   | 0    | 0    | 0    | 0    | 240.48 | 11        |
| c16 branched alkanes                             | 0    | 11    | 0   | 0   | 0   | 0    | 0    | 0   | 0    | 0    | 0    | 5    | 0   | 0    | 0    | 0    | 0    | 226.45 | 11        |
| dimethylundecanes                                | 0    | 11    | 0   | 0   | 0   | 0    | 0    | 0   | 0    | 0    | 0    | 2    | 0   | 0    | 0    | 0    | 0    | 184.37 | 11        |
| ethylmethyloctane                                | 0    | 11    | 0   | 0   | 0   | 0    | 0    | 0   | 0    | 0    | 0    | 0    | 0   | 0    | 0    | 0    | 0    | 156.31 | 11        |
| n-pentylcyclohexane                              | 0    | 11    | 0   | 0   | 0   | 0    | 0    | 0   | 0    | 0    | 0    | 0    | 0   | 0    | 0    | 0    | 0    | 154.3  | 11        |
| ethyl propylcyclohexanes                         | 0    | 11    | 0   | 0   | 0   | 0    | 0    | 0   | 0    | 0    | 0    | 0    | 0   | 0    | 0    | 0    | 0    | 154.3  | 11        |
| diethylmethylcyclohexanes                        | 0    | 11    | 0   | 0   | 0   | 0    | 0    | 0   | 0    | 0    | 0    | 0    | 0   | 0    | 0    | 0    | 0    | 154.3  | 11        |
| dimethyldecane                                   | 0    | 11    | 0   | 0   | 0   | 0    | 0    | 0   | 0    | 0    | 0    | 1    | 0   | 0    | 0    | 0    | 0    | 170.34 | 11        |
| 2-methyldecane                                   | 0    | 11    | 0   | 0   | 0   | 0    | 0    | 0   | 0    | 0    | 0    | 0    | 0   | 0    | 0    | 0    | 0    | 156.31 | 11        |

**Table 1. Matrix of Assignments from Real Compounds to Carbon Bond 05 (CB05) Model Species**

| name                                        | NASN | PAR   | OLE  | TOL | XYL | FORM | ALD2 | ETH | ISOP | MEOH | ETOH | NR   | CH4 | ETHA | IOLE | ALDX | TERP | MW     | # carbons |
|---------------------------------------------|------|-------|------|-----|-----|------|------|-----|------|------|------|------|-----|------|------|------|------|--------|-----------|
| methyldecalsins                             | 0    | 11    | 0    | 0   | 0   | 0    | 0    | 0   | 0    | 0    | 0    | 0    | 0   | 0    | 0    | 0    | 0    | 152.28 | 11        |
| methylundecane                              | 0    | 11.2  | 0    | 0   | 0   | 0    | 0    | 0   | 0    | 0    | 0    | 0.8  | 0   | 0    | 0    | 0    | 0    | 170.34 | 11.2      |
| isomers of pentadecane (c15 paraffins)      | 0    | 11.25 | 0    | 0   | 0   | 0    | 0    | 0   | 0    | 0    | 0    | 3.75 | 0   | 0    | 0    | 0    | 0    | 212.42 | 11.25     |
| ethyltrimethyloctane                        | 0    | 12    | 0    | 0   | 0   | 0    | 0    | 0   | 0    | 0    | 0    | 0    | 0   | 0    | 0    | 0    | 0    | 170.34 | 12        |
| dimethylbutylcyclohexane                    | 0    | 12    | 0    | 0   | 0   | 0    | 0    | 0   | 0    | 0    | 0    | 0    | 0   | 0    | 0    | 0    | 0    | 168.32 | 12        |
| c2 alkyl decalin                            | 0    | 12    | 0    | 0   | 0   | 0    | 0    | 0   | 0    | 0    | 0    | 0    | 0   | 0    | 0    | 0    | 0    | 166.31 | 12        |
| nonadecane                                  | 0    | 13    | 0    | 0   | 0   | 0    | 0    | 0   | 0    | 0    | 0    | 6    | 0   | 0    | 0    | 0    | 0    | 268.53 | 13        |
| trimethyldecane                             | 0    | 13    | 0    | 0   | 0   | 0    | 0    | 0   | 0    | 0    | 0    | 0    | 0   | 0    | 0    | 0    | 0    | 184.37 | 13        |
| methylpropylnonane                          | 0    | 13    | 0    | 0   | 0   | 0    | 0    | 0   | 0    | 0    | 0    | 0    | 0   | 0    | 0    | 0    | 0    | 184.37 | 13        |
| eicosane                                    | 0    | 14    | 0    | 0   | 0   | 0    | 0    | 0   | 0    | 0    | 0    | 6    | 0   | 0    | 0    | 0    | 0    | 282.56 | 14        |
| isomers of heptadecane (c17 paraffins)      | 0    | 15    | 0    | 0   | 0   | 0    | 0    | 0   | 0    | 0    | 0    | 2    | 0   | 0    | 0    | 0    | 0    | 240.48 | 15        |
| isomers of octadecane (c18 paraffins)       | 0    | 16.5  | 0    | 0   | 0   | 0    | 0    | 0   | 0    | 0    | 0    | 1.5  | 0   | 0    | 0    | 0    | 0    | 254.5  | 16.5      |
| <b>ALKENES - examples</b>                   |      |       |      |     |     |      |      |     |      |      |      |      |     |      |      |      |      |        |           |
| ethylene                                    | 0    | 0     | 0    | 0   | 0   | 0    | 0    | 1   | 0    | 0    | 0    | 0    | 0   | 0    | 0    | 0    | 0    | 28.05  | 2         |
| propylene                                   | 0    | 1     | 1    | 0   | 0   | 0    | 0    | 0   | 0    | 0    | 0    | 0    | 0   | 0    | 0    | 0    | 0    | 42.08  | 3         |
| 1,2-propadiene                              | 0    | 0     | 1.5  | 0   | 0   | 0    | 0    | 0   | 0    | 0    | 0    | 0    | 0   | 0    | 0    | 0    | 0    | 40.07  | 3         |
| trans-2-butene                              | 0    | 0     | 0    | 0   | 0   | 0    | 0    | 0   | 0    | 0    | 0    | 0    | 0   | 0    | 1    | 0    | 0    | 56.11  | 4         |
| cis-2-butene                                | 0    | 0     | 0    | 0   | 0   | 0    | 0    | 0   | 0    | 0    | 0    | 0    | 0   | 0    | 1    | 0    | 0    | 56.11  | 4         |
| 2-methylpropene (isobutene)                 | 0    | 3     | 0    | 0   | 0   | 1    | 0    | 0   | 0    | 0    | 0    | 0    | 0   | 0    | 0    | 0    | 0    | 56.11  | 4         |
| isomers of butene                           | 0    | 1     | 0.5  | 0   | 0   | 0    | 0    | 0   | 0    | 0    | 0    | 0    | 0   | 0    | 0    | 1    | 0    | 56.11  | 4         |
| 1-butene                                    | 0    | 2     | 1    | 0   | 0   | 0    | 0    | 0   | 0    | 0    | 0    | 0    | 0   | 0    | 0    | 0    | 0    | 56.11  | 4         |
| 4-vinylcyclohexene                          | 0    | 2     | 1    | 0   | 0   | 0    | 0    | 0   | 0    | 0    | 0    | 0    | 0   | 0    | 0    | 0    | 0    | 108.18 | 4         |
| 1,2-butadiene {methylallene}                | 0    | 1     | 1.5  | 0   | 0   | 0    | 0    | 0   | 0    | 0    | 0    | 0    | 0   | 0    | 0    | 0    | 0    | 54.09  | 4         |
| 1,3-butadiene                               | 0    | 0     | 2    | 0   | 0   | 0    | 0    | 0   | 0    | 0    | 0    | 0    | 0   | 0    | 0    | 0    | 0    | 54.09  | 4         |
| methylbutene                                | 0    | 3.33  | 0.33 | 0   | 0   | 0.33 | 0    | 0   | 0    | 0    | 0    | 0    | 0   | 0    | 0    | 0.33 | 0    | 70.14  | 4.98      |
| 1,3-cyclopentadiene                         | 0    | 0     | 0    | 0   | 0   | 0    | 0    | 0   | 0    | 0    | 0    | 0    | 0   | 0    | 1.25 | 0    | 0    | 66.1   | 5         |
| methylbutadiene                             | 0    | 0     | 0    | 0   | 0   | 0    | 0    | 0   | 1    | 0    | 0    | 0    | 0   | 0    | 0    | 0    | 0    | 68.12  | 5         |
| isoprene                                    | 0    | 0     | 0    | 0   | 0   | 0    | 0    | 0   | 1    | 0    | 0    | 0    | 0   | 0    | 0    | 0    | 0    | 68.12  | 5         |
| trans-2-pentene                             | 0    | 1     | 0    | 0   | 0   | 0    | 0    | 0   | 0    | 0    | 0    | 0    | 0   | 0    | 1    | 0    | 0    | 70.14  | 5         |
| cis-2-pentene                               | 0    | 1     | 0    | 0   | 0   | 0    | 0    | 0   | 0    | 0    | 0    | 0    | 0   | 0    | 1    | 0    | 0    | 70.14  | 5         |
| 2-methyl-2-butene                           | 0    | 3     | 0    | 0   | 0   | 0    | 1    | 0   | 0    | 0    | 0    | 0    | 0   | 0    | 0    | 0    | 0    | 70.14  | 5         |
| 2-methyl-1-butene                           | 0    | 4     | 0    | 0   | 0   | 1    | 0    | 0   | 0    | 0    | 0    | 0    | 0   | 0    | 0    | 0    | 0    | 70.14  | 5         |
| isomers of pentene                          | 0    | 2.4   | 0.2  | 0   | 0   | 0.2  | 0    | 0   | 0    | 0    | 0    | 0    | 0   | 0    | 0    | 1    | 0    | 70.14  | 5         |
| 3-methyl-1-butene                           | 0    | 3     | 1    | 0   | 0   | 0    | 0    | 0   | 0    | 0    | 0    | 0    | 0   | 0    | 0    | 0    | 0    | 70.14  | 5         |
| 1-pentene                                   | 0    | 3     | 1    | 0   | 0   | 0    | 0    | 0   | 0    | 0    | 0    | 0    | 0   | 0    | 0    | 0    | 0    | 70.14  | 5         |
| 1,4-pentadiene                              | 0    | 1     | 2    | 0   | 0   | 0    | 0    | 0   | 0    | 0    | 0    | 0    | 0   | 0    | 0    | 0    | 0    | 68.12  | 5         |
| cyclopentene                                | 0    | 1     | 0    | 0   | 0   | 0    | 0    | 0   | 0    | 0    | 0    | 0    | 0   | 0    | 1    | 0    | 0    | 68.12  | 5         |
| normal pentene isomers                      | 0    | 3     | 1    | 0   | 0   | 0    | 0    | 0   | 0    | 0    | 0    | 0    | 0   | 0    | 0    | 0    | 0    | 70.14  | 5         |
| piperylene {1,3-pentadiene} (mixed isomers) | 0    | 0     | 0.5  | 0   | 0   | 0    | 0    | 0   | 0    | 0    | 0    | 0    | 0   | 0    | 1    | 0    | 0    | 68.12  | 5         |
| cyclohexene                                 | 0    | 2     | 0    | 0   | 0   | 0    | 0    | 0   | 0    | 0    | 0    | 0    | 0   | 0    | 1    | 0    | 0    | 82.15  | 6         |
| cis-3-hexene                                | 0    | 2     | 0    | 0   | 0   | 0    | 0    | 0   | 0    | 0    | 0    | 0    | 0   | 0    | 1    | 0    | 0    | 84.16  | 6         |
| 2-hexenes                                   | 0    | 2     | 0    | 0   | 0   | 0    | 0    | 0   | 0    | 0    | 0    | 0    | 0   | 0    | 1    | 0    | 0    | 84.16  | 6         |
| 4-methyl-trans-2-pentene                    | 0    | 2     | 0    | 0   | 0   | 0    | 0    | 0   | 0    | 0    | 0    | 0    | 0   | 0    | 1    | 0    | 0    | 84.16  | 6         |
| trans-3-hexene                              | 0    | 2     | 0    | 0   | 0   | 0    | 0    | 0   | 0    | 0    | 0    | 0    | 0   | 0    | 1    | 0    | 0    | 84.16  | 6         |
| trans-2-hexene                              | 0    | 2     | 0    | 0   | 0   | 0    | 0    | 0   | 0    | 0    | 0    | 0    | 0   | 0    | 1    | 0    | 0    | 84.16  | 6         |
| cis-2-hexene                                | 0    | 2     | 0    | 0   | 0   | 0    | 0    | 0   | 0    | 0    | 0    | 0    | 0   | 0    | 1    | 0    | 0    | 84.16  | 6         |

**Table 1. Matrix of Assignments from Real Compounds to Carbon Bond 05 (CB05) Model Species**

| name                                       | NASN | PAR  | OLE  | TOL | XYL | FORM | ALD2 | ETH | ISOP | MEOH | ETOH | NR   | CH4 | ETHA | IOLE | ALDX | TERP | MW     | # carbons |
|--------------------------------------------|------|------|------|-----|-----|------|------|-----|------|------|------|------|-----|------|------|------|------|--------|-----------|
| 1-methylcyclopentene                       | 0    | 2    | 0    | 0   | 0   | 0    | 0    | 0   | 0    | 0    | 0    | 0    | 0   | 0    | 1    | 0    | 0    | 82.15  | 6         |
| dimethylbutene                             | 0    | 3.5  | 0    | 0   | 0   | 0.5  | 0    | 0   | 0    | 0    | 0    | 0    | 0   | 0    | 0    | 1    | 0    | 84.16  | 6         |
| 2-methyl-2-pentene                         | 0    | 4    | 0    | 0   | 0   | 0    | 0    | 0   | 0    | 0    | 0    | 0    | 0   | 0    | 0    | 1    | 0    | 84.16  | 6         |
| 3-methyl-trans-2-pentene                   | 0    | 4    | 0    | 0   | 0   | 0    | 1    | 0   | 0    | 0    | 0    | 0    | 0   | 0    | 0    | 0    | 0    | 84.16  | 6         |
| 2,3-dimethyl-1-butene                      | 0    | 5    | 0    | 0   | 0   | 1    | 0    | 0   | 0    | 0    | 0    | 0    | 0   | 0    | 0    | 0    | 0    | 84.16  | 6         |
| 2-ethyl-1-butene                           | 0    | 5    | 0    | 0   | 0   | 1    | 0    | 0   | 0    | 0    | 0    | 0    | 0   | 0    | 0    | 0    | 0    | 84.16  | 6         |
| 2-methyl-1-pentene                         | 0    | 5    | 0    | 0   | 0   | 1    | 0    | 0   | 0    | 0    | 0    | 0    | 0   | 0    | 0    | 0    | 0    | 84.16  | 6         |
| c6 olefins (hexene isomers)                | 0    | 3    | 0.33 | 0   | 0   | 0    | 0    | 0   | 0    | 0    | 0    | 0    | 0   | 0    | 0    | 1.17 | 0    | 84.16  | 6         |
| methylpentenes                             | 0    | 3.5  | 0.5  | 0   | 0   | 0    | 0    | 0   | 0    | 0    | 0    | 0    | 0   | 0    | 0    | 0.75 | 0    | 84.16  | 6         |
| hexadiene                                  | 0    | 0    | 1    | 0   | 0   | 0    | 0    | 0   | 0    | 0    | 0    | 0    | 0   | 0    | 1    | 0    | 0    | 82.15  | 6         |
| methylcyclopentadiene                      | 0    | 0    | 1    | 0   | 0   | 0    | 0    | 0   | 0    | 0    | 0    | 0    | 0   | 0    | 1    | 0    | 0    | 80.13  | 6         |
| 1-hexene                                   | 0    | 4    | 1    | 0   | 0   | 0    | 0    | 0   | 0    | 0    | 0    | 0    | 0   | 0    | 0    | 0    | 0    | 84.16  | 6         |
| 3-methyl-1-pentene                         | 0    | 4    | 1    | 0   | 0   | 0    | 0    | 0   | 0    | 0    | 0    | 0    | 0   | 0    | 0    | 0    | 0    | 84.16  | 6         |
| 4-methyl-1-pentene                         | 0    | 4    | 1    | 0   | 0   | 0    | 0    | 0   | 0    | 0    | 0    | 0    | 0   | 0    | 0    | 0    | 0    | 84.16  | 6         |
| methylcyclohexene                          | 0    | 3    | 0    | 0   | 0   | 0    | 0    | 0   | 0    | 0    | 0    | 0    | 0   | 0    | 1    | 0    | 0    | 96.17  | 7         |
| methylhexadiene                            | 0    | 3    | 0    | 0   | 0   | 0    | 0    | 0   | 0    | 0    | 0    | 0    | 0   | 0    | 1    | 0    | 0    | 96.17  | 7         |
| 3-ethyl-2-pentene                          | 0    | 5    | 0    | 0   | 0   | 0    | 1    | 0   | 0    | 0    | 0    | 0    | 0   | 0    | 0    | 0    | 0    | 98.19  | 7         |
| 1-methyl cyclohexene                       | 0    | 5    | 0    | 0   | 0   | 0    | 0    | 0   | 0    | 0    | 0    | 0    | 0   | 0    | 0    | 1    | 0    | 96.17  | 7         |
| 2,4,4-trimethyl-1-pentene                  | 0    | 6    | 0    | 0   | 0   | 1    | 0    | 0   | 0    | 0    | 0    | 1    | 0   | 0    | 0    | 0    | 0    | 112.22 | 7         |
| c7 olefins                                 | 0    | 4    | 0.5  | 0   | 0   | 0    | 0    | 0   | 0    | 0    | 0    | 0    | 0   | 0    | 0    | 1    | 0    | 98.19  | 7         |
| ethylpentene                               | 0    | 5    | 0.5  | 0   | 0   | 0    | 0    | 0   | 0    | 0    | 0    | 0    | 0   | 0    | 0    | 0.5  | 0    | 98.19  | 7         |
| dimethylpentene                            | 0    | 4.5  | 0.75 | 0   | 0   | 0    | 0    | 0   | 0    | 0    | 0    | 0    | 0   | 0    | 0    | 0.5  | 0    | 98.19  | 7         |
| methylcyclohexadiene                       | 0    | 1    | 1    | 0   | 0   | 0    | 0    | 0   | 0    | 0    | 0    | 0    | 0   | 0    | 1    | 0    | 0    | 94.16  | 7         |
| 1-heptene                                  | 0    | 5    | 1    | 0   | 0   | 0    | 0    | 0   | 0    | 0    | 0    | 0    | 0   | 0    | 0    | 0    | 0    | 98.19  | 7         |
| ethylcyclopentene                          | 0    | 5    | 1    | 0   | 0   | 0    | 0    | 0   | 0    | 0    | 0    | 0    | 0   | 0    | 0    | 0    | 0    | 96.17  | 7         |
| dimethylcyclopenten                        | 0    | 5    | 1    | 0   | 0   | 0    | 0    | 0   | 0    | 0    | 0    | 0    | 0   | 0    | 0    | 0    | 0    | 96.17  | 7         |
| 3-heptene (mixed cis,trans)                | 0    | 3    | 0    | 0   | 0   | 0    | 0    | 0   | 0    | 0    | 0    | 0    | 0   | 0    | 1    | 0    | 0    | 98.19  | 7         |
| methylhexenes                              | 0    | 4    | 0.5  | 0   | 0   | 0    | 0    | 0   | 0    | 0    | 0    | 0    | 0   | 0    | 0    | 1    | 0    | 98.19  | 7         |
| heptenes                                   | 0    | 3.33 | 0.17 | 0   | 0   | 0    | 0    | 0   | 0    | 0    | 0    | 0    | 0   | 0    | 0    | 1.67 | 0    | 98.19  | 7.01      |
| c8 olefins                                 | 0    | 4.67 | 0.5  | 0   | 0   | 0    | 0    | 0   | 0    | 0    | 0    | 0.33 | 0   | 0    | 0    | 1    | 0    | 112.22 | 7.67      |
| cis-2-octene                               | 0    | 4    | 0    | 0   | 0   | 0    | 0    | 0   | 0    | 0    | 0    | 0    | 0   | 0    | 1    | 0    | 0    | 112.22 | 8         |
| 2,4,4-trimethyl-2-pentene (beta diisobutyl | 0    | 6    | 0    | 0   | 0   | 0    | 1    | 0   | 0    | 0    | 0    | 0    | 0   | 0    | 0    | 0    | 0    | 112.22 | 8         |
| dimethylhexadiene                          | 0    | 2    | 1    | 0   | 0   | 0    | 0    | 0   | 0    | 0    | 0    | 0    | 0   | 0    | 1    | 0    | 0    | 110.2  | 8         |
| tetramethylcyclobutene                     | 0    | 6    | 1    | 0   | 0   | 0    | 0    | 0   | 0    | 0    | 0    | 0    | 0   | 0    | 0    | 0    | 0    | 110.2  | 8         |
| 1-octene                                   | 0    | 6    | 1    | 0   | 0   | 0    | 0    | 0   | 0    | 0    | 0    | 0    | 0   | 0    | 0    | 0    | 0    | 112.22 | 8         |
| butoxybutene                               | 0    | 6    | 1    | 0   | 0   | 0    | 0    | 0   | 0    | 0    | 0    | 0    | 0   | 0    | 0    | 0    | 0    | 128.22 | 8         |
| octatriene                                 | 0    | 0    | 2    | 0   | 0   | 0    | 0    | 0   | 0    | 0    | 0    | 0    | 0   | 0    | 1    | 0    | 0    | 108.18 | 8         |
| trimethylpentadiene                        | 0    | 4    | 2    | 0   | 0   | 0    | 0    | 0   | 0    | 0    | 0    | 0    | 0   | 0    | 0    | 0    | 0    | 110.2  | 8         |
| methyl heptene                             | 0    | 5.33 | 0.67 | 0   | 0   | 0    | 0    | 0   | 0    | 0    | 0    | 0    | 0   | 0    | 0    | 0.67 | 0    | 112.22 | 8.01      |
| trans-2-nonene                             | 0    | 5    | 0    | 0   | 0   | 0    | 0    | 0   | 0    | 0    | 0    | 0    | 0   | 0    | 1    | 0    | 0    | 126.24 | 9         |
| 4-nonene (mixed isomers)                   | 0    | 5    | 0    | 0   | 0   | 0    | 0    | 0   | 0    | 0    | 0    | 0    | 0   | 0    | 1    | 0    | 0    | 126.24 | 9         |
| c9 olefins                                 | 0    | 6    | 0.5  | 0   | 0   | 0    | 0    | 0   | 0    | 0    | 0    | 0    | 0   | 0    | 0    | 1    | 0    | 126.24 | 9         |
| nonadiene                                  | 0    | 3    | 1    | 0   | 0   | 0    | 0    | 0   | 0    | 0    | 0    | 0    | 0   | 0    | 1    | 0    | 0    | 124.23 | 9         |
| ethylheptene                               | 0    | 7    | 1    | 0   | 0   | 0    | 0    | 0   | 0    | 0    | 0    | 0    | 0   | 0    | 0    | 0    | 0    | 126.24 | 9         |
| trimethylhexene                            | 0    | 7    | 1    | 0   | 0   | 0    | 0    | 0   | 0    | 0    | 0    | 0    | 0   | 0    | 0    | 0    | 0    | 126.24 | 9         |
| 1-nonene                                   | 0    | 7    | 1    | 0   | 0   | 0    | 0    | 0   | 0    | 0    | 0    | 0    | 0   | 0    | 0    | 0    | 0    | 126.24 | 9         |
| c10 olefins                                | 0    | 6.17 | 0.33 | 0   | 0   | 0    | 0    | 0   | 0    | 0    | 0    | 0.5  | 0   | 0    | 0    | 1.33 | 0    | 140.27 | 9.49      |

**Table 1. Matrix of Assignments from Real Compounds to Carbon Bond 05 (CB05) Model Species**

| name                                  | NASN | PAR  | OLE | TOL | XYL | FORM | ALD2 | ETH | ISOP | MEOH | ETOH | NR | CH4 | ETHA | IOLE | ALDX | TERP | MW     | # carbons |
|---------------------------------------|------|------|-----|-----|-----|------|------|-----|------|------|------|----|-----|------|------|------|------|--------|-----------|
| 3-carene                              | 0    | 0    | 0   | 0   | 0   | 0    | 0    | 0   | 0    | 0    | 0    | 0  | 0   | 0    | 0    | 0    | 1    | 136.24 | 10        |
| d-limonene                            | 0    | 0    | 0   | 0   | 0   | 0    | 0    | 0   | 0    | 0    | 0    | 0  | 0   | 0    | 0    | 0    | 1    | 136.24 | 10        |
| a-pinene                              | 0    | 0    | 0   | 0   | 0   | 0    | 0    | 0   | 0    | 0    | 0    | 0  | 0   | 0    | 0    | 0    | 1    | 136.24 | 10        |
| b-pinene                              | 0    | 0    | 0   | 0   | 0   | 0    | 0    | 0   | 0    | 0    | 0    | 0  | 0   | 0    | 0    | 0    | 1    | 136.24 | 10        |
| terpinene                             | 0    | 0    | 0   | 0   | 0   | 0    | 0    | 0   | 0    | 0    | 0    | 0  | 0   | 0    | 0    | 0    | 1    | 136.24 | 10        |
| myrcene                               | 0    | 0    | 0   | 0   | 0   | 0    | 0    | 0   | 0    | 0    | 0    | 0  | 0   | 0    | 0    | 0    | 1    | 136.24 | 10        |
| dimethyloctenes                       | 0    | 6    | 0   | 0   | 0   | 0    | 0    | 0   | 0    | 0    | 0    | 0  | 0   | 0    | 1    | 0    | 0    | 140.27 | 10        |
| propylheptenes                        | 0    | 7    | 0.5 | 0   | 0   | 0    | 0    | 0   | 0    | 0    | 0    | 0  | 0   | 0    | 0    | 1    | 0    | 140.27 | 10        |
| methylnonenes                         | 0    | 7    | 0.5 | 0   | 0   | 0    | 0    | 0   | 0    | 0    | 0    | 0  | 0   | 0    | 0    | 1    | 0    | 140.27 | 10        |
| ethyloctenes                          | 0    | 7    | 0.5 | 0   | 0   | 0    | 0    | 0   | 0    | 0    | 0    | 0  | 0   | 0    | 0    | 1    | 0    | 140.27 | 10        |
| c12 olefins                           | 0    | 7    | 0.5 | 0   | 0   | 0    | 0    | 0   | 0    | 0    | 0    | 2  | 0   | 0    | 0    | 1    | 0    | 168.32 | 10        |
| 4-phenyl-1-butene                     | 0    | 1    | 1   | 1   | 0   | 0    | 0    | 0   | 0    | 0    | 0    | 0  | 0   | 0    | 0    | 0    | 0    | 132.21 | 10        |
| trans-1-phenylbutene                  | 0    | 1    | 1   | 1   | 0   | 0    | 0    | 0   | 0    | 0    | 0    | 0  | 0   | 0    | 0    | 0    | 0    | 132.21 | 10        |
| 1-decene                              | 0    | 8    | 1   | 0   | 0   | 0    | 0    | 0   | 0    | 0    | 0    | 0  | 0   | 0    | 0    | 0    | 0    | 140.27 | 10        |
| b-phellandrene {1(7)-2-p-menthadiene} | 0    | 0    | 0   | 0   | 0   | 0    | 0    | 0   | 0    | 0    | 0    | 0  | 0   | 0    | 0    | 0    | 1    | 136.24 | 10        |
| dl-limonene {dipentene}               | 0    | 0    | 0   | 0   | 0   | 0    | 0    | 0   | 0    | 0    | 0    | 0  | 0   | 0    | 0    | 0    | 1    | 136.24 | 10        |
| terpene                               | 0    | 0    | 0   | 0   | 0   | 0    | 0    | 0   | 0    | 0    | 0    | 0  | 0   | 0    | 0    | 0    | 1    | 136.24 | 10        |
| methyldecenes                         | 0    | 8    | 0.5 | 0   | 0   | 0    | 0    | 0   | 0    | 0    | 0    | 0  | 0   | 0    | 0    | 1    | 0    | 154.3  | 11        |
| c11 olefins                           | 0    | 8    | 0.5 | 0   | 0   | 0    | 0    | 0   | 0    | 0    | 0    | 0  | 0   | 0    | 0    | 1    | 0    | 154.3  | 11        |
| 1-undecene                            | 0    | 9    | 1   | 0   | 0   | 0    | 0    | 0   | 0    | 0    | 0    | 0  | 0   | 0    | 0    | 0    | 0    | 154.3  | 11        |
| trimethylnonene                       | 0    | 10   | 1   | 0   | 0   | 0    | 0    | 0   | 0    | 0    | 0    | 0  | 0   | 0    | 0    | 0    | 0    | 168.32 | 12        |
| 1-Dodecene                            | 0    | 10   | 1   | 0   | 0   | 0    | 0    | 0   | 0    | 0    | 0    | 0  | 0   | 0    | 0    | 0    | 0    | 168.32 | 12        |
| trimethyldecenes                      | 0    | 10   | 0.5 | 0   | 0   | 0    | 0    | 0   | 0    | 0    | 0    | 0  | 0   | 0    | 0    | 1    | 0    | 182.35 | 13        |
| caryophyllene                         | 0    | 9    | 3   | 0   | 0   | 0    | 0    | 0   | 0    | 0    | 0    | 0  | 0   | 0    | 0    | 0    | 0    | 204.36 | 15        |
| <b>ALKYNES - examples</b>             |      |      |     |     |     |      |      |     |      |      |      |    |     |      |      |      |      |        |           |
| acetylene                             | 0    | 1    | 0   | 0   | 0   | 0    | 0    | 0   | 0    | 0    | 0    | 1  | 0   | 0    | 0    | 0    | 0    | 26.04  | 1         |
| 1-propyne                             | 0    | 1    | 0   | 0   | 0   | 0    | 0    | 0   | 0    | 0    | 0    | 0  | 0   | 0    | 0    | 1    | 0    | 40.07  | 3         |
| 1-butyne (ethylacetylene)             | 0    | 2    | 0   | 0   | 0   | 0    | 0    | 0   | 0    | 0    | 0    | 0  | 0   | 0    | 0    | 1    | 0    | 54.09  | 4         |
| 2-butyne                              | 0    | 2    | 0   | 0   | 0   | 0    | 0    | 0   | 0    | 0    | 0    | 0  | 0   | 0    | 0    | 1    | 0    | 54.09  | 4         |
| 1-pentyne                             | 0    | 3    | 0   | 0   | 0   | 0    | 0    | 0   | 0    | 0    | 0    | 0  | 0   | 0    | 0    | 1    | 0    | 68.12  | 5         |
| pentenyne                             | 0    | 1    | 1   | 0   | 0   | 0    | 0    | 0   | 0    | 0    | 0    | 0  | 0   | 0    | 0    | 1    | 0    | 66.1   | 5         |
| hexyne                                | 0    | 4    | 0   | 0   | 0   | 0    | 0    | 0   | 0    | 0    | 0    | 0  | 0   | 0    | 0    | 1    | 0    | 82.15  | 6         |
| methylheptyne (6-methyl-2-heptyne)    | 0    | 6    | 0   | 0   | 0   | 0    | 0    | 0   | 0    | 0    | 0    | 0  | 0   | 0    | 0    | 1    | 0    | 110.2  | 8         |
| dimethyloctyne                        | 0    | 8    | 0   | 0   | 0   | 0    | 0    | 0   | 0    | 0    | 0    | 0  | 0   | 0    | 0    | 1    | 0    | 138.25 | 10        |
| <b>ALDEYHDES - examples</b>           |      |      |     |     |     |      |      |     |      |      |      |    |     |      |      |      |      |        |           |
| benzaldehyde                          | 0    | 0    | 0   | 0   | 0   | 0    | 0    | 0   | 0    | 0    | 0    | 7  | 0   | 0    | 0    | 0    | 0    | 106.12 | 0         |
| p-tolualdehyde {4-methylbenzaldehyde} | 0    | 0    | 0   | 0   | 0   | 0    | 0    | 0   | 0    | 0    | 0    | 8  | 0   | 0    | 0    | 0    | 0    | 120.15 | 0         |
| formaldehyde                          | 0    | 0    | 0   | 0   | 0   | 1    | 0    | 0   | 0    | 0    | 0    | 0  | 0   | 0    | 0    | 0    | 0    | 30.03  | 1         |
| acetaldehyde                          | 0    | 0    | 0   | 0   | 0   | 0    | 1    | 0   | 0    | 0    | 0    | 0  | 0   | 0    | 0    | 0    | 0    | 44.05  | 2         |
| glyoxal                               | 0    | 1    | 0   | 0   | 0   | 1    | 0    | 0   | 0    | 0    | 0    | 0  | 0   | 0    | 0    | 0    | 0    | 58.04  | 2         |
| total c2-c5 aldehydes                 | 0    | 0.65 | 0   | 0   | 0   | 0    | 0    | 0   | 0    | 0    | 0    | 0  | 0   | 0    | 0    | 1    | 0    | 53.11  | 2.65      |
| acrolein (2-propenal)                 | 0    | 0    | 0.5 | 0   | 0   | 0    | 0    | 0   | 0    | 0    | 0    | 0  | 0   | 0    | 0    | 1    | 0    | 56.06  | 3         |
| propionaldehyde                       | 0    | 1    | 0   | 0   | 0   | 0    | 0    | 0   | 0    | 0    | 0    | 0  | 0   | 0    | 0    | 1    | 0    | 58.08  | 3         |
| methyl glyoxal                        | 0    | 0    | 0   | 0   | 0   | 1    | 0    | 0   | 0    | 0    | 0    | 0  | 0   | 0    | 0    | 1    | 0    | 72.06  | 3         |
| butyraldehyde                         | 0    | 2    | 0   | 0   | 0   | 0    | 0    | 0   | 0    | 0    | 0    | 0  | 0   | 0    | 0    | 1    | 0    | 72.11  | 4         |

**Table 1. Matrix of Assignments from Real Compounds to Carbon Bond 05 (CB05) Model Species**

| name                                       | NASN | PAR  | OLE | TOL | XYL | FORM | ALD2 | ETH | ISOP | MEOH | ETOH | NR  | CH4 | ETHA | IOLE | ALDX | TERP | MW     | # carbons |
|--------------------------------------------|------|------|-----|-----|-----|------|------|-----|------|------|------|-----|-----|------|------|------|------|--------|-----------|
| isobutyraldehyde                           | 0    | 2    | 0   | 0   | 0   | 0    | 0    | 0   | 0    | 0    | 0    | 0   | 0   | 0    | 0    | 1    | 0    | 72.11  | 4         |
| crotonaldehyde                             | 0    | 0    | 1   | 0   | 0   | 0    | 0    | 0   | 0    | 0    | 0    | 0   | 0   | 0    | 0    | 1    | 0    | 70.09  | 4         |
| n-pentanal (n-valeraldehyde)               | 0    | 3    | 0   | 0   | 0   | 0    | 0    | 0   | 0    | 0    | 0    | 0   | 0   | 0    | 0    | 1    | 0    | 86.13  | 5         |
| isovaleraldehyde (3-methylbutanal)         | 0    | 3    | 0   | 0   | 0   | 0    | 0    | 0   | 0    | 0    | 0    | 0   | 0   | 0    | 0    | 1    | 0    | 86.13  | 5         |
| 2-furfural                                 | 0    | 1    | 1   | 0   | 0   | 0    | 0    | 0   | 0    | 0    | 0    | 0   | 0   | 0    | 0    | 1    | 0    | 96.09  | 5         |
| 2-Hexenal                                  | 0    | 2    | 1   | 0   | 0   | 0    | 0    | 0   | 0    | 0    | 0    | 0   | 0   | 0    | 0    | 1    | 0    | 98.15  | 6         |
| hexanal (hexanaladehyde)                   | 0    | 4    | 0   | 0   | 0   | 0    | 0    | 0   | 0    | 0    | 0    | 0   | 0   | 0    | 0    | 1    | 0    | 100.16 | 6         |
| 2,4-hexadienal                             | 0    | 0    | 1   | 0   | 0   | 0    | 0    | 0   | 0    | 0    | 0    | 0   | 0   | 0    | 1    | 0    | 0    | 96.13  | 6         |
| methylhexanal                              | 0    | 5    | 0   | 0   | 0   | 0    | 0    | 0   | 0    | 0    | 0    | 0   | 0   | 0    | 0    | 1    | 0    | 114.19 | 7         |
| trans, trans-2,4-heptadienal               | 0    | 1    | 1   | 0   | 0   | 0    | 0    | 0   | 0    | 0    | 0    | 0   | 0   | 0    | 1    | 0    | 0    | 110.16 | 7         |
| ethylhexaldehyde                           | 0    | 6    | 0   | 0   | 0   | 0    | 0    | 0   | 0    | 0    | 0    | 0   | 0   | 0    | 0    | 1    | 0    | 128.22 | 8         |
| <b>ALCOHOLS - examples</b>                 |      |      |     |     |     |      |      |     |      |      |      |     |     |      |      |      |      |        |           |
| carvomenthol (2-p-menthanol) (2-methyl-5-( | 0    | 0    | 0   | 0   | 0   | 0    | 0    | 0   | 0    | 0    | 0    | 10  | 0   | 0    | 0    | 0    | 0    | 156.27 | 0         |
| methyl alcohol                             | 0    | 0    | 0   | 0   | 0   | 0    | 0    | 0   | 0    | 1    | 0    | 0   | 0   | 0    | 0    | 0    | 0    | 32.04  | 1         |
| phenol (carbolic acid)                     | 0    | 1    | 0   | 0   | 0   | 0    | 0    | 0   | 0    | 0    | 0    | 5   | 0   | 0    | 0    | 0    | 0    | 94.11  | 1         |
| ethyl alcohol                              | 0    | 0    | 0   | 0   | 0   | 0    | 0    | 0   | 0    | 0    | 1    | 0   | 0   | 0    | 0    | 0    | 0    | 46.07  | 2         |
| ethylene glycol                            | 0    | 2    | 0   | 0   | 0   | 0    | 0    | 0   | 0    | 0    | 0    | 0   | 0   | 0    | 0    | 0    | 0    | 62.07  | 2         |
| 2-Methylaminoethanol                       | 0    | 1    | 0   | 0   | 0   | 0    | 0    | 0   | 0    | 0    | 0    | 0   | 0   | 0    | 0    | 1    | 0    | 75.11  | 3         |
| n-propyl alcohol                           | 0    | 3    | 0   | 0   | 0   | 0    | 0    | 0   | 0    | 0    | 0    | 0   | 0   | 0    | 0    | 0    | 0    | 60.1   | 3         |
| isopropyl alcohol                          | 0    | 3    | 0   | 0   | 0   | 0    | 0    | 0   | 0    | 0    | 0    | 0   | 0   | 0    | 0    | 0    | 0    | 60.1   | 3         |
| tert-butyl alcohol                         | 0    | 3    | 0   | 0   | 0   | 0    | 0    | 0   | 0    | 0    | 0    | 1   | 0   | 0    | 0    | 0    | 0    | 74.12  | 3         |
| propylene glycol                           | 0    | 3    | 0   | 0   | 0   | 0    | 0    | 0   | 0    | 0    | 0    | 0   | 0   | 0    | 0    | 0    | 0    | 76.1   | 3         |
| glycerol                                   | 0    | 3    | 0   | 0   | 0   | 0    | 0    | 0   | 0    | 0    | 0    | 0   | 0   | 0    | 0    | 0    | 0    | 92.1   | 3         |
| 2-methoxyethanol {methyl cellosolve} {egme | 0    | 3    | 0   | 0   | 0   | 0    | 0    | 0   | 0    | 0    | 0    | 0   | 0   | 0    | 0    | 0    | 0    | 76.1   | 3         |
| diglycolamine (2-(2-aminoethoxy)ethanol)   | 0    | 2    | 0   | 0   | 0   | 0    | 0    | 0   | 0    | 0    | 0    | 0   | 0   | 0    | 0    | 1    | 0    | 105.14 | 4         |
| n-butyl alcohol                            | 0    | 4    | 0   | 0   | 0   | 0    | 0    | 0   | 0    | 0    | 0    | 0   | 0   | 0    | 0    | 0    | 0    | 74.12  | 4         |
| isobutyl alcohol                           | 0    | 4    | 0   | 0   | 0   | 0    | 0    | 0   | 0    | 0    | 0    | 0   | 0   | 0    | 0    | 0    | 0    | 74.12  | 4         |
| sec-butyl alcohol                          | 0    | 4    | 0   | 0   | 0   | 0    | 0    | 0   | 0    | 0    | 0    | 0   | 0   | 0    | 0    | 0    | 0    | 74.12  | 4         |
| 1,4-butanediol                             | 0    | 4    | 0   | 0   | 0   | 0    | 0    | 0   | 0    | 0    | 0    | 0   | 0   | 0    | 0    | 0    | 0    | 90.12  | 4         |
| butandiol                                  | 0    | 4    | 0   | 0   | 0   | 0    | 0    | 0   | 0    | 0    | 0    | 0   | 0   | 0    | 0    | 0    | 0    | 90.12  | 4         |
| diethylene glycol (2,2'-oxybisethanol)     | 0    | 4    | 0   | 0   | 0   | 0    | 0    | 0   | 0    | 0    | 0    | 0   | 0   | 0    | 0    | 0    | 0    | 106.12 | 4         |
| 2-ethoxyethanol {cellosolve} {egee}        | 0    | 4    | 0   | 0   | 0   | 0    | 0    | 0   | 0    | 0    | 0    | 0   | 0   | 0    | 0    | 0    | 0    | 90.12  | 4         |
| misc. alcohols                             | 0    | 4.74 | 0   | 0   | 0   | 0    | 0    | 0   | 0    | 0    | 0    | 0.1 | 0   | 0    | 0    | 0    | 0    | 85.64  | 4.74      |
| amyl alcohols                              | 0    | 5    | 0   | 0   | 0   | 0    | 0    | 0   | 0    | 0    | 0    | 0   | 0   | 0    | 0    | 0    | 0    | 88.15  | 5         |
| furfuryl alcohol                           | 0    | 1    | 2   | 0   | 0   | 0    | 0    | 0   | 0    | 0    | 0    | 0   | 0   | 0    | 0    | 0    | 0    | 98.1   | 5         |
| n-pentanol                                 | 0    | 5    | 0   | 0   | 0   | 0    | 0    | 0   | 0    | 0    | 0    | 0   | 0   | 0    | 0    | 0    | 0    | 88.15  | 5         |
| 1-ethoxy-2-propanol                        | 0    | 5    | 0   | 0   | 0   | 0    | 0    | 0   | 0    | 0    | 0    | 0   | 0   | 0    | 0    | 0    | 0    | 104.15 | 5         |
| isoamyl alcohol (3-methyl-1-butanol)       | 0    | 5    | 0   | 0   | 0   | 0    | 0    | 0   | 0    | 0    | 0    | 0   | 0   | 0    | 0    | 0    | 0    | 88.15  | 5         |
| bis-phenol a                               | 0    | 5    | 0   | 0   | 0   | 0    | 0    | 0   | 0    | 0    | 0    | 10  | 0   | 0    | 0    | 0    | 0    | 228.29 | 5         |
| methyl carbitol {2-(2-methoxyethoxy)ethano | 0    | 5    | 0   | 0   | 0   | 0    | 0    | 0   | 0    | 0    | 0    | 0   | 0   | 0    | 0    | 0    | 0    | 120.15 | 5         |
| diisopropylene glycol                      | 0    | 2    | 0   | 0   | 0   | 0    | 0    | 0   | 0    | 0    | 0    | 0   | 0   | 0    | 0    | 2    | 0    | 134.18 | 6         |
| diethyl aminoethanol                       | 0    | 4    | 0   | 0   | 0   | 0    | 0    | 0   | 0    | 0    | 0    | 0   | 0   | 0    | 0    | 1    | 0    | 117.19 | 6         |
| 2-Ethyl-1,3-hexanediol                     | 0    | 6    | 0   | 0   | 0   | 0    | 0    | 0   | 0    | 0    | 0    | 2   | 0   | 0    | 0    | 0    | 0    | 146.23 | 6         |
| triethylene glycol                         | 0    | 6    | 0   | 0   | 0   | 0    | 0    | 0   | 0    | 0    | 0    | 0   | 0   | 0    | 0    | 0    | 0    | 150.18 | 6         |
| 2-Hexyloxyethanol                          | 0    | 6    | 0   | 0   | 0   | 0    | 0    | 0   | 0    | 0    | 0    | 2   | 0   | 0    | 0    | 0    | 0    | 146.23 | 6         |
| cyclohexanol                               | 0    | 6    | 0   | 0   | 0   | 0    | 0    | 0   | 0    | 0    | 0    | 0   | 0   | 0    | 0    | 0    | 0    | 100.16 | 6         |

**Table 1. Matrix of Assignments from Real Compounds to Carbon Bond 05 (CB05) Model Species**

| name                                       | NASN | PAR  | OLE | TOL | XYL | FORM | ALD2 | ETH | ISOP | MEOH | ETOH | NR   | CH4 | ETHA | IOLE | ALDX | TERP | MW     | # carbons |
|--------------------------------------------|------|------|-----|-----|-----|------|------|-----|------|------|------|------|-----|------|------|------|------|--------|-----------|
| hexylene glycol (2-methylpentane-2,4-diol) | 0    | 6    | 0   | 0   | 0   | 0    | 0    | 0   | 0    | 0    | 0    | 0    | 0   | 0    | 0    | 0    | 0    | 118.18 | 6         |
| 1-hexanol (n-hexanol)                      | 0    | 6    | 0   | 0   | 0   | 0    | 0    | 0   | 0    | 0    | 0    | 0    | 0   | 0    | 0    | 0    | 0    | 102.18 | 6         |
| 4-methyl-2-pentanol (methyl isobutyl carbi | 0    | 6    | 0   | 0   | 0   | 0    | 0    | 0   | 0    | 0    | 0    | 0    | 0   | 0    | 0    | 0    | 0    | 102.18 | 6         |
| diacetone alcohol (4-hydroxy-4-methyl-2-pe | 0    | 6    | 0   | 0   | 0   | 0    | 0    | 0   | 0    | 0    | 0    | 0    | 0   | 0    | 0    | 0    | 0    | 116.16 | 6         |
| butyl cellosolve {2-butoxyethanol} {egbe}  | 0    | 6    | 0   | 0   | 0   | 0    | 0    | 0   | 0    | 0    | 0    | 0    | 0   | 0    | 0    | 0    | 0    | 118.18 | 6         |
| carbitol {degee} {2-(2-ethoxyethoxy)ethano | 0    | 6    | 0   | 0   | 0   | 0    | 0    | 0   | 0    | 0    | 0    | 0    | 0   | 0    | 0    | 0    | 0    | 134.18 | 6         |
| benzyl alcohol                             | 0    | 0    | 0   | 1   | 0   | 0    | 0    | 0   | 0    | 0    | 0    | 0    | 0   | 0    | 0    | 0    | 0    | 108.14 | 7         |
| 2,2,4-Trimethyl-1,3-Pentanediol            | 0    | 7    | 0   | 0   | 0   | 0    | 0    | 0   | 0    | 0    | 0    | 1    | 0   | 0    | 0    | 0    | 0    | 146.23 | 7         |
| 1-heptanol                                 | 0    | 7    | 0   | 0   | 0   | 0    | 0    | 0   | 0    | 0    | 0    | 0    | 0   | 0    | 0    | 0    | 0    | 116.2  | 7         |
| dimethylpentanol (2,3-dimethyl-1-pentanol) | 0    | 7    | 0   | 0   | 0   | 0    | 0    | 0   | 0    | 0    | 0    | 0    | 0   | 0    | 0    | 0    | 0    | 116.2  | 7         |
| o-cresol (2-methyl-benzenol)               | 0    | 0    | 0   | 1   | 0   | 0    | 0    | 0   | 0    | 0    | 0    | 0    | 0   | 0    | 0    | 0    | 0    | 108.14 | 7         |
| biphenylol {2-phenylphenol}                | 0    | 0    | 0   | 1   | 0   | 0    | 0    | 0   | 0    | 0    | 0    | 5    | 0   | 0    | 0    | 0    | 0    | 170.21 | 7         |
| cresols                                    | 0    | 0    | 0   | 1   | 0   | 0    | 0    | 0   | 0    | 0    | 0    | 0    | 0   | 0    | 0    | 0    | 0    | 108.14 | 7         |
| octanol isomers                            | 0    | 7.25 | 0   | 0   | 0   | 0    | 0    | 0   | 0    | 0    | 0    | 0.75 | 0   | 0    | 0    | 0    | 0    | 130.23 | 7.25      |
| c8 phenols                                 | 0    | 1    | 0   | 1   | 0   | 0    | 0    | 0   | 0    | 0    | 0    | 0    | 0   | 0    | 0    | 0    | 0    | 122.17 | 8         |
| xlenol                                     | 0    | 1    | 0   | 1   | 0   | 0    | 0    | 0   | 0    | 0    | 0    | 0    | 0   | 0    | 0    | 0    | 0    | 122.17 | 8         |
| 2-(2-butoxyethoxy)ethanol {butyl carbitol  | 0    | 8    | 0   | 0   | 0   | 0    | 0    | 0   | 0    | 0    | 0    | 0    | 0   | 0    | 0    | 0    | 0    | 162.23 | 8         |
| methylheptanol                             | 0    | 8    | 0   | 0   | 0   | 0    | 0    | 0   | 0    | 0    | 0    | 0    | 0   | 0    | 0    | 0    | 0    | 130.23 | 8         |
| 2-ethyl-1-hexanol                          | 0    | 8    | 0   | 0   | 0   | 0    | 0    | 0   | 0    | 0    | 0    | 0    | 0   | 0    | 0    | 0    | 0    | 130.23 | 8         |
| dimethylbenzylalcohol                      | 0    | 1    | 0   | 0   | 1   | 0    | 0    | 0   | 0    | 0    | 0    | 0    | 0   | 0    | 0    | 0    | 0    | 136.19 | 9         |
| c9 phenols                                 | 0    | 2    | 0   | 1   | 0   | 0    | 0    | 0   | 0    | 0    | 0    | 0    | 0   | 0    | 0    | 0    | 0    | 136.19 | 9         |
| trimethylcyclohexanol                      | 0    | 9    | 0   | 0   | 0   | 0    | 0    | 0   | 0    | 0    | 0    | 0    | 0   | 0    | 0    | 0    | 0    | 142.24 | 9         |
| dimethylheptanol (2,6-dimethyl-2-heptanol) | 0    | 9    | 0   | 0   | 0   | 0    | 0    | 0   | 0    | 0    | 0    | 0    | 0   | 0    | 0    | 0    | 0    | 144.26 | 9         |
| ethylmethylphenol                          | 0    | 2    | 0   | 0   | 1   | 0    | 0    | 0   | 0    | 0    | 0    | 0    | 0   | 0    | 0    | 0    | 0    | 150.22 | 10        |
| c10 alkylphenols                           | 0    | 3    | 0   | 1   | 0   | 0    | 0    | 0   | 0    | 0    | 0    | 0    | 0   | 0    | 0    | 0    | 0    | 150.22 | 10        |
| 2-N,N-Dibutylaminoethanol                  | 0    | 8    | 0   | 0   | 0   | 0    | 0    | 0   | 0    | 0    | 0    | 0    | 0   | 0    | 0    | 1    | 0    | 173.3  | 10        |
| 1-decanol                                  | 0    | 10   | 0   | 0   | 0   | 0    | 0    | 0   | 0    | 0    | 0    | 0    | 0   | 0    | 0    | 0    | 0    | 158.29 | 10        |
| 3,7-dimethyl-1-octanol                     | 0    | 10   | 0   | 0   | 0   | 0    | 0    | 0   | 0    | 0    | 0    | 0    | 0   | 0    | 0    | 0    | 0    | 158.29 | 10        |
| a-terpineol                                | 0    | 0    | 0   | 0   | 0   | 0    | 0    | 0   | 0    | 0    | 0    | 0    | 0   | 0    | 0    | 0    | 1    | 154.25 | 10        |
| c11 alkylphenols                           | 0    | 4    | 0   | 1   | 0   | 0    | 0    | 0   | 0    | 0    | 0    | 0    | 0   | 0    | 0    | 0    | 0    | 164.25 | 11        |
| nonylphenol                                | 0    | 8    | 0   | 1   | 0   | 0    | 0    | 0   | 0    | 0    | 0    | 0    | 0   | 0    | 0    | 0    | 0    | 220.36 | 15        |
| <b>ETHERS - examples</b>                   |      |      |     |     |     |      |      |     |      |      |      |      |     |      |      |      |      |        |           |
| ethylene oxide                             | 0    | 1    | 0   | 0   | 0   | 0    | 0    | 0   | 0    | 0    | 0    | 1    | 0   | 0    | 0    | 0    | 0    | 44.05  | 1         |
| dimethyl ether                             | 0    | 2    | 0   | 0   | 0   | 0    | 0    | 0   | 0    | 0    | 0    | 0    | 0   | 0    | 0    | 0    | 0    | 46.07  | 2         |
| propylene oxide                            | 0    | 2    | 0   | 0   | 0   | 0    | 0    | 0   | 0    | 0    | 0    | 1    | 0   | 0    | 0    | 0    | 0    | 58.08  | 2         |
| dimethoxymethane (methylal)                | 0    | 3    | 0   | 0   | 0   | 0    | 0    | 0   | 0    | 0    | 0    | 0    | 0   | 0    | 0    | 0    | 0    | 76.1   | 3         |
| ethyl ether                                | 0    | 4    | 0   | 0   | 0   | 0    | 0    | 0   | 0    | 0    | 0    | 0    | 0   | 0    | 0    | 0    | 0    | 74.12  | 4         |
| methyl t-butyl ether (mtbe)                | 0    | 4    | 0   | 0   | 0   | 0    | 0    | 0   | 0    | 0    | 0    | 1    | 0   | 0    | 0    | 0    | 0    | 88.15  | 4         |
| tetrahydrofuran                            | 0    | 2    | 0   | 0   | 0   | 0    | 0    | 0   | 0    | 0    | 0    | 0    | 0   | 0    | 0    | 1    | 0    | 72.11  | 4         |
| 1,4-dioxane                                | 0    | 4    | 0   | 0   | 0   | 0    | 0    | 0   | 0    | 0    | 0    | 0    | 0   | 0    | 0    | 0    | 0    | 88.11  | 4         |
| propylene glycol methyl ether {1-methoxy-2 | 0    | 2    | 0   | 0   | 0   | 0    | 0    | 0   | 0    | 0    | 0    | 0    | 0   | 0    | 0    | 1    | 0    | 90.12  | 4         |
| ethyl t-butyl ether                        | 0    | 3    | 0   | 0   | 0   | 0    | 0    | 0   | 0    | 0    | 0    | 1    | 0   | 0    | 0    | 1    | 0    | 102.18 | 5         |
| ethyl isopropyl ether                      | 0    | 5    | 0   | 0   | 0   | 0    | 0    | 0   | 0    | 0    | 0    | 0    | 0   | 0    | 0    | 0    | 0    | 88.15  | 5         |
| t-amylmethylether (tame)                   | 0    | 5    | 0   | 0   | 0   | 0    | 0    | 0   | 0    | 0    | 0    | 1    | 0   | 0    | 0    | 0    | 0    | 102.18 | 5         |
| ethylene glycol propyl ether {2-propoxyet  | 0    | 5    | 0   | 0   | 0   | 0    | 0    | 0   | 0    | 0    | 0    | 0    | 0   | 0    | 0    | 0    | 0    | 104.15 | 5         |
| 4,4-Dimethyl-3-oxahexane                   | 0    | 4    | 0   | 0   | 0   | 0    | 0    | 0   | 0    | 0    | 0    | 1    | 0   | 0    | 0    | 1    | 0    | 116.2  | 6         |

**Table 1. Matrix of Assignments from Real Compounds to Carbon Bond 05 (CB05) Model Species**

| name                                       | NASN | PAR | OLE | TOL | XYL | FORM | ALD2 | ETH | ISOP | MEOH | ETOH | NR | CH4 | ETHA | IOLE | ALDX | TERP | MW     | # carbons |
|--------------------------------------------|------|-----|-----|-----|-----|------|------|-----|------|------|------|----|-----|------|------|------|------|--------|-----------|
| diisopropyl ether                          | 0    | 6   | 0   | 0   | 0   | 0    | 0    | 0   | 0    | 0    | 0    | 0  | 0   | 0    | 0    | 0    | 0    | 102.18 | 6         |
| propylene glycol n-propyl ether            | 0    | 6   | 0   | 0   | 0   | 0    | 0    | 0   | 0    | 0    | 0    | 0  | 0   | 0    | 0    | 0    | 0    | 118.18 | 6         |
| acetal (1,1-diethoxyethane)                | 0    | 2   | 0   | 0   | 0   | 0    | 0    | 0   | 0    | 0    | 0    | 0  | 0   | 0    | 0    | 2    | 0    | 118.18 | 6         |
| ethylfuran                                 | 0    | 2   | 2   | 0   | 0   | 0    | 0    | 0   | 0    | 0    | 0    | 0  | 0   | 0    | 0    | 0    | 0    | 96.13  | 6         |
| di(propylene glycol) methyl ether          | 0    | 5   | 0   | 0   | 0   | 0    | 0    | 0   | 0    | 0    | 0    | 0  | 0   | 0    | 0    | 1    | 0    | 148.2  | 7         |
| dibutyl ether                              | 0    | 8   | 0   | 0   | 0   | 0    | 0    | 0   | 0    | 0    | 0    | 0  | 0   | 0    | 0    | 0    | 0    | 130.23 | 8         |
| 2-butyltetrahydrofuran                     | 0    | 6   | 0   | 0   | 0   | 0    | 0    | 0   | 0    | 0    | 0    | 0  | 0   | 0    | 0    | 1    | 0    | 128.22 | 8         |
| <b>KETONES - examples</b>                  |      |     |     |     |     |      |      |     |      |      |      |    |     |      |      |      |      |        |           |
| carvone                                    | 0    | 0   | 0   | 0   | 0   | 0    | 0    | 0   | 0    | 0    | 0    | 10 | 0   | 0    | 0    | 0    | 0    | 150.22 | 0         |
| acetone                                    | 0    | 3   | 0   | 0   | 0   | 0    | 0    | 0   | 0    | 0    | 0    | 0  | 0   | 0    | 0    | 0    | 0    | 58.08  | 3         |
| methyl ethyl ketone (mek) (2-butanone)     | 0    | 4   | 0   | 0   | 0   | 0    | 0    | 0   | 0    | 0    | 0    | 0  | 0   | 0    | 0    | 0    | 0    | 72.11  | 4         |
| 1-methyl-2-pyrrolidinone                   | 0    | 4   | 0   | 0   | 0   | 0    | 0    | 0   | 0    | 0    | 0    | 0  | 0   | 0    | 0    | 0.5  | 0    | 99.13  | 5         |
| Methyl Isopropyl Ketone                    | 0    | 5   | 0   | 0   | 0   | 0    | 0    | 0   | 0    | 0    | 0    | 0  | 0   | 0    | 0    | 0    | 0    | 86.13  | 5         |
| methyl n-butyl ketone                      | 0    | 6   | 0   | 0   | 0   | 0    | 0    | 0   | 0    | 0    | 0    | 0  | 0   | 0    | 0    | 0    | 0    | 100.16 | 6         |
| methyl isobutyl ketone                     | 0    | 6   | 0   | 0   | 0   | 0    | 0    | 0   | 0    | 0    | 0    | 0  | 0   | 0    | 0    | 0    | 0    | 100.16 | 6         |
| cyclohexanone                              | 0    | 6   | 0   | 0   | 0   | 0    | 0    | 0   | 0    | 0    | 0    | 0  | 0   | 0    | 0    | 0    | 0    | 98.15  | 6         |
| dimethylcyclobutanone                      | 0    | 6   | 0   | 0   | 0   | 0    | 0    | 0   | 0    | 0    | 0    | 0  | 0   | 0    | 0    | 0    | 0    | 98.15  | 6         |
| methyl amyl ketone                         | 0    | 7   | 0   | 0   | 0   | 0    | 0    | 0   | 0    | 0    | 0    | 0  | 0   | 0    | 0    | 0    | 0    | 114.19 | 7         |
| 2-methyl-3-hexanone                        | 0    | 7   | 0   | 0   | 0   | 0    | 0    | 0   | 0    | 0    | 0    | 0  | 0   | 0    | 0    | 0    | 0    | 114.19 | 7         |
| propylcyclohexanone                        | 0    | 7   | 0   | 0   | 0   | 0    | 0    | 0   | 0    | 0    | 0    | 2  | 0   | 0    | 0    | 0    | 0    | 140.23 | 7         |
| heptanone                                  | 0    | 7   | 0   | 0   | 0   | 0    | 0    | 0   | 0    | 0    | 0    | 0  | 0   | 0    | 0    | 0    | 0    | 114.19 | 7         |
| methylacetophenone                         | 0    | 1   | 0   | 1   | 0   | 0    | 0    | 0   | 0    | 0    | 0    | 1  | 0   | 0    | 0    | 0    | 0    | 134.18 | 8         |
| trimethylcyclopentanone                    | 0    | 8   | 0   | 0   | 0   | 0    | 0    | 0   | 0    | 0    | 0    | 0  | 0   | 0    | 0    | 0    | 0    | 126.2  | 8         |
| dihydroxynaphthalenedione                  | 0    | 2   | 0   | 1   | 0   | 0    | 0    | 0   | 0    | 0    | 0    | 1  | 0   | 0    | 0    | 0    | 0    | 190.16 | 9         |
| nonenone                                   | 0    | 7   | 1   | 0   | 0   | 0    | 0    | 0   | 0    | 0    | 0    | 0  | 0   | 0    | 0    | 0    | 0    | 140.23 | 9         |
| 2,2,4,4-tetramethyl-3-pentanone            | 0    | 9   | 0   | 0   | 0   | 0    | 0    | 0   | 0    | 0    | 0    | 0  | 0   | 0    | 0    | 0    | 0    | 142.24 | 9         |
| c4 substituted cyclohexanone               | 0    | 10  | 0   | 0   | 0   | 0    | 0    | 0   | 0    | 0    | 0    | 0  | 0   | 0    | 0    | 0    | 0    | 154.25 | 10        |
| 9,10-anthraquinone                         | 0    | 0   | 0   | 2   | 0   | 0    | 0    | 0   | 0    | 0    | 0    | 0  | 0   | 0    | 0    | 0    | 0    | 208.22 | 14        |
| 1-aminoanthraquinone                       | 0    | 0   | 0   | 2   | 0   | 0    | 0    | 0   | 0    | 0    | 0    | 0  | 0   | 0    | 0    | 0    | 0    | 223.23 | 14        |
| <b>ORGANIC ACIDS - examples</b>            |      |     |     |     |     |      |      |     |      |      |      |    |     |      |      |      |      |        |           |
| formic acid                                | 0    | 0   | 0   | 0   | 0   | 0    | 0    | 0   | 0    | 0    | 0    | 1  | 0   | 0    | 0    | 0    | 0    | 46.03  | 0         |
| oxalic acid                                | 0    | 0   | 0   | 0   | 0   | 0    | 0    | 0   | 0    | 0    | 0    | 2  | 0   | 0    | 0    | 0    | 0    | 90.04  | 0         |
| acetic acid                                | 0    | 1   | 0   | 0   | 0   | 0    | 0    | 0   | 0    | 0    | 0    | 1  | 0   | 0    | 0    | 0    | 0    | 60.05  | 1         |
| benzoic acid                               | 0    | 1   | 0   | 0   | 0   | 0    | 0    | 0   | 0    | 0    | 0    | 6  | 0   | 0    | 0    | 0    | 0    | 122.12 | 1         |
| terephthalic acid (p-benzenedicarboxylic a | 0    | 1   | 0   | 0   | 0   | 0    | 0    | 0   | 0    | 0    | 0    | 7  | 0   | 0    | 0    | 0    | 0    | 166.13 | 1         |
| propionic acid                             | 0    | 2   | 0   | 0   | 0   | 0    | 0    | 0   | 0    | 0    | 0    | 1  | 0   | 0    | 0    | 0    | 0    | 74.08  | 2         |
| acrylic acid                               | 0    | 0   | 1   | 0   | 0   | 0    | 0    | 0   | 0    | 0    | 0    | 1  | 0   | 0    | 0    | 0    | 0    | 72.06  | 2         |
| methacrylic acid                           | 0    | 1   | 1   | 0   | 0   | 0    | 0    | 0   | 0    | 0    | 0    | 1  | 0   | 0    | 0    | 0    | 0    | 86.09  | 3         |
| butanoic acid                              | 0    | 3   | 0   | 0   | 0   | 0    | 0    | 0   | 0    | 0    | 0    | 1  | 0   | 0    | 0    | 0    | 0    | 88.11  | 3         |
| 3-Methylbutanoic acid                      | 0    | 3   | 0   | 0   | 0   | 0    | 0    | 0   | 0    | 0    | 0    | 2  | 0   | 0    | 0    | 0    | 0    | 102.13 | 3         |
| isobutyric acid                            | 0    | 3   | 0   | 0   | 0   | 0    | 0    | 0   | 0    | 0    | 0    | 1  | 0   | 0    | 0    | 0    | 0    | 88.11  | 3         |
| adipic acid                                | 0    | 4   | 0   | 0   | 0   | 0    | 0    | 0   | 0    | 0    | 0    | 2  | 0   | 0    | 0    | 0    | 0    | 146.14 | 4         |
| 2-ethylhexanoic acid                       | 0    | 7   | 0   | 0   | 0   | 0    | 0    | 0   | 0    | 0    | 0    | 1  | 0   | 0    | 0    | 0    | 0    | 144.21 | 7         |
| Phenylacetic Acid                          | 0    | 0   | 0   | 1   | 0   | 0    | 0    | 0   | 0    | 0    | 0    | 1  | 0   | 0    | 0    | 0    | 0    | 136.15 | 7         |
| dimethylethylbenzoic acid                  | 0    | 1   | 0   | 0   | 1   | 0    | 0    | 0   | 0    | 0    | 0    | 0  | 0   | 0    | 0    | 0    | 0    | 150.18 | 9         |

Table 1. Matrix of Assignments from Real Compounds to Carbon Bond 05 (CB05) Model Species

| name                                         | NASN | PAR  | OLE | TOL | XYL | FORM | ALD2 | ETH | ISOP | MEOH | ETOH | NR   | CH4 | ETHA | IOLE | ALDX | TERP | MW     | # carbons |
|----------------------------------------------|------|------|-----|-----|-----|------|------|-----|------|------|------|------|-----|------|------|------|------|--------|-----------|
| <b>ESTERS - examples</b>                     |      |      |     |     |     |      |      |     |      |      |      |      |     |      |      |      |      |        |           |
| methyl formate                               | 0    | 1    | 0   | 0   | 0   | 0    | 0    | 0   | 0    | 0    | 0    | 1    | 0   | 0    | 0    | 0    | 0    | 60.05  | 1         |
| phthalic anhydride                           | 0    | 1    | 0   | 0   | 0   | 0    | 0    | 0   | 0    | 0    | 0    | 7    | 0   | 0    | 0    | 0    | 0    | 148.12 | 1         |
| acetic anhydride                             | 0    | 2    | 0   | 0   | 0   | 0    | 0    | 0   | 0    | 0    | 0    | 2    | 0   | 0    | 0    | 0    | 0    | 102.09 | 2         |
| methyl acetate                               | 0    | 2    | 0   | 0   | 0   | 0    | 0    | 0   | 0    | 0    | 0    | 1    | 0   | 0    | 0    | 0    | 0    | 74.08  | 2         |
| vinyl acetate                                | 0    | 1    | 1   | 0   | 0   | 0    | 0    | 0   | 0    | 0    | 0    | 1    | 0   | 0    | 0    | 0    | 0    | 86.09  | 3         |
| ethyl acetate                                | 0    | 3    | 0   | 0   | 0   | 0    | 0    | 0   | 0    | 0    | 0    | 1    | 0   | 0    | 0    | 0    | 0    | 88.11  | 3         |
| methyl acrylate                              | 0    | 1    | 1   | 0   | 0   | 0    | 0    | 0   | 0    | 0    | 0    | 1    | 0   | 0    | 0    | 0    | 0    | 86.09  | 3         |
| dimethylterephthalate                        | 0    | 3    | 0   | 0   | 0   | 0    | 0    | 0   | 0    | 0    | 0    | 7    | 0   | 0    | 0    | 0    | 0    | 194.19 | 3         |
| dimethyl phthalate                           | 0    | 3    | 0   | 0   | 0   | 0    | 0    | 0   | 0    | 0    | 0    | 7    | 0   | 0    | 0    | 0    | 0    | 194.19 | 3         |
| Isopropyl Formate                            | 0    | 3    | 0   | 0   | 0   | 0    | 0    | 0   | 0    | 0    | 0    | 1    | 0   | 0    | 0    | 0    | 0    | 88.11  | 3         |
| maleic anhydride                             | 0    | 0    | 2   | 0   | 0   | 0    | 0    | 0   | 0    | 0    | 0    | 0    | 0   | 0    | 0    | 0    | 0    | 98.06  | 4         |
| propyl acetate                               | 0    | 4    | 0   | 0   | 0   | 0    | 0    | 0   | 0    | 0    | 0    | 1    | 0   | 0    | 0    | 0    | 0    | 102.13 | 4         |
| isopropyl acetate                            | 0    | 4    | 0   | 0   | 0   | 0    | 0    | 0   | 0    | 0    | 0    | 1    | 0   | 0    | 0    | 0    | 0    | 102.13 | 4         |
| ethyl acrylate                               | 0    | 2    | 1   | 0   | 0   | 0    | 0    | 0   | 0    | 0    | 0    | 1    | 0   | 0    | 0    | 0    | 0    | 100.12 | 4         |
| methyl methacrylate                          | 0    | 2    | 1   | 0   | 0   | 0    | 0    | 0   | 0    | 0    | 0    | 1    | 0   | 0    | 0    | 0    | 0    | 100.12 | 4         |
| hydroxypropyl acrylate                       | 0    | 2    | 1   | 0   | 0   | 0    | 0    | 0   | 0    | 0    | 0    | 2    | 0   | 0    | 0    | 0    | 0    | 130.14 | 4         |
| dimethyl succinate (dimethyl butaneate)      | 0    | 4    | 0   | 0   | 0   | 0    | 0    | 0   | 0    | 0    | 0    | 2    | 0   | 0    | 0    | 0    | 0    | 146.14 | 4         |
| misc. esters                                 | 0    | 4.11 | 0   | 0   | 0   | 0    | 0    | 0   | 0    | 0    | 0    | 1    | 0   | 0    | 0    | 0.01 | 0    | 104.38 | 4.13      |
| c5 ester                                     | 0    | 4.33 | 0   | 0   | 0   | 0    | 0    | 0   | 0    | 0    | 0    | 0.67 | 0   | 0    | 0    | 0    | 0    | 102.13 | 4.33      |
| propylene glycol monomethyl ether acetate    | 0    | 3    | 0   | 0   | 0   | 0    | 0    | 0   | 0    | 0    | 0    | 1    | 0   | 0    | 0    | 1    | 0    | 132.16 | 5         |
| n-butyl acetate                              | 0    | 5    | 0   | 0   | 0   | 0    | 0    | 0   | 0    | 0    | 0    | 1    | 0   | 0    | 0    | 0    | 0    | 116.16 | 5         |
| isobutyl acetate                             | 0    | 5    | 0   | 0   | 0   | 0    | 0    | 0   | 0    | 0    | 0    | 1    | 0   | 0    | 0    | 0    | 0    | 116.16 | 5         |
| 2-ethoxyethyl acetate {cellosolve acetate}   | 0    | 5    | 0   | 0   | 0   | 0    | 0    | 0   | 0    | 0    | 0    | 1    | 0   | 0    | 0    | 0    | 0    | 132.16 | 5         |
| pentanedioic acid, dimethyl ester (dimethyl) | 0    | 5    | 0   | 0   | 0   | 0    | 0    | 0   | 0    | 0    | 0    | 2    | 0   | 0    | 0    | 0    | 0    | 160.17 | 5         |
| n-Propyl Propionate                          | 0    | 5    | 0   | 0   | 0   | 0    | 0    | 0   | 0    | 0    | 0    | 1    | 0   | 0    | 0    | 0    | 0    | 116.16 | 5         |
| n-butyl benzoate                             | 0    | 5    | 0   | 0   | 0   | 0    | 0    | 0   | 0    | 0    | 0    | 6    | 0   | 0    | 0    | 0    | 0    | 178.23 | 5         |
| methyl isobutyrate                           | 0    | 5    | 0   | 0   | 0   | 0    | 0    | 0   | 0    | 0    | 0    | 0    | 0   | 0    | 0    | 0    | 0    | 102.13 | 5         |
| amyl acetate                                 | 0    | 6    | 0   | 0   | 0   | 0    | 0    | 0   | 0    | 0    | 0    | 1    | 0   | 0    | 0    | 0    | 0    | 130.19 | 6         |
| n-butyl acrylate                             | 0    | 4    | 1   | 0   | 0   | 0    | 0    | 0   | 0    | 0    | 0    | 1    | 0   | 0    | 0    | 0    | 0    | 128.17 | 6         |
| dimethyl adipate (dimethylhexanedioate)      | 0    | 6    | 0   | 0   | 0   | 0    | 0    | 0   | 0    | 0    | 0    | 2    | 0   | 0    | 0    | 0    | 0    | 174.2  | 6         |
| isobutyl acrylate {2-propenoic acid}         | 0    | 4    | 1   | 0   | 0   | 0    | 0    | 0   | 0    | 0    | 0    | 1    | 0   | 0    | 0    | 0    | 0    | 128.17 | 6         |
| butyl methacrylate                           | 0    | 5    | 1   | 0   | 0   | 0    | 0    | 0   | 0    | 0    | 0    | 1    | 0   | 0    | 0    | 0    | 0    | 142.2  | 7         |
| dipropyl phthalate                           | 0    | 7    | 0   | 0   | 0   | 0    | 0    | 0   | 0    | 0    | 0    | 7    | 0   | 0    | 0    | 0    | 0    | 250.3  | 7         |
| 2-butoxyethyl acetate (ethylene glycol but)  | 0    | 5    | 0   | 0   | 0   | 0    | 0    | 0   | 0    | 0    | 0    | 1    | 0   | 0    | 0    | 1    | 0    | 160.21 | 7         |
| ethylhexanoate (ethyl n-hexanoate)           | 0    | 7    | 0   | 0   | 0   | 0    | 0    | 0   | 0    | 0    | 0    | 1    | 0   | 0    | 0    | 0    | 0    | 144.21 | 7         |
| substituted c9 ester (c12)                   | 0    | 7    | 0   | 0   | 0   | 0    | 0    | 0   | 0    | 0    | 0    | 5    | 0   | 0    | 0    | 0    | 0    | 216.32 | 7         |
| substituted c7 ester (c12)                   | 0    | 7    | 0   | 0   | 0   | 0    | 0    | 0   | 0    | 0    | 0    | 5    | 0   | 0    | 0    | 0    | 0    | 216.32 | 7         |
| methylethylpentanoate                        | 0    | 7    | 0   | 0   | 0   | 0    | 0    | 0   | 0    | 0    | 0    | 1    | 0   | 0    | 0    | 0    | 0    | 144.21 | 7         |
| methyl amyl acetate (4-methyl-2-pentanol a   | 0    | 7    | 0   | 0   | 0   | 0    | 0    | 0   | 0    | 0    | 0    | 1    | 0   | 0    | 0    | 0    | 0    | 144.21 | 7         |
| isobutyl isobutyrate                         | 0    | 7    | 0   | 0   | 0   | 0    | 0    | 0   | 0    | 0    | 0    | 1    | 0   | 0    | 0    | 0    | 0    | 144.21 | 7         |
| dipropylene glycol methyl ether acetate      | 0    | 6    | 0   | 0   | 0   | 0    | 0    | 0   | 0    | 0    | 0    | 1    | 0   | 0    | 0    | 1    | 0    | 190.24 | 8         |
| 2-Ethyl-Hexyl Acrylate                       | 0    | 6    | 1   | 0   | 0   | 0    | 0    | 0   | 0    | 0    | 0    | 3    | 0   | 0    | 0    | 0    | 0    | 184.28 | 8         |
| butylisopropylphthalate                      | 0    | 8    | 0   | 0   | 0   | 0    | 0    | 0   | 0    | 0    | 0    | 7    | 0   | 0    | 0    | 0    | 0    | 264.32 | 8         |
| dibutyl phthalate                            | 0    | 9    | 0   | 0   | 0   | 0    | 0    | 0   | 0    | 0    | 0    | 7    | 0   | 0    | 0    | 0    | 0    | 278.35 | 9         |
| diethylene glycol butyl ether acetate {2-2   | 0    | 9    | 0   | 0   | 0   | 0    | 0    | 0   | 0    | 0    | 0    | 1    | 0   | 0    | 0    | 0    | 0    | 204.27 | 9         |

**Table 1. Matrix of Assignments from Real Compounds to Carbon Bond 05 (CB05) Model Species**

| name                                     | NASN | PAR  | OLE | TOL  | XYL  | FORM | ALD2 | ETH | ISOP | MEOH | ETOH | NR | CH4 | ETHA | IOLE | ALDX | TERP | MW     | # carbons |
|------------------------------------------|------|------|-----|------|------|------|------|-----|------|------|------|----|-----|------|------|------|------|--------|-----------|
| isoamyl isobutyrate                      | 0    | 9    | 0   | 0    | 0    | 0    | 0    | 0   | 0    | 0    | 0    | 0  | 0   | 0    | 0    | 0    | 0    | 158.24 | 9         |
| methyl c11 ester                         | 0    | 11   | 0   | 0    | 0    | 0    | 0    | 0   | 0    | 0    | 0    | 2  | 0   | 0    | 0    | 0    | 0    | 212.33 | 11        |
| methyl dodecanoate {methyl laurate}      | 0    | 12   | 0   | 0    | 0    | 0    | 0    | 0   | 0    | 0    | 0    | 1  | 0   | 0    | 0    | 0    | 0    | 214.35 | 12        |
| methyl c12 ester                         | 0    | 12   | 0   | 0    | 0    | 0    | 0    | 0   | 0    | 0    | 0    | 2  | 0   | 0    | 0    | 0    | 0    | 228.38 | 12        |
| methyl myristate {methyl tetradecanoate} | 0    | 14   | 0   | 0    | 0    | 0    | 0    | 0   | 0    | 0    | 0    | 1  | 0   | 0    | 0    | 0    | 0    | 242.4  | 14        |
| methyl c13 ester                         | 0    | 14   | 0   | 0    | 0    | 0    | 0    | 0   | 0    | 0    | 0    | 1  | 0   | 0    | 0    | 0    | 0    | 242.4  | 14        |
| methyl c15 ester                         | 0    | 16   | 0   | 0    | 0    | 0    | 0    | 0   | 0    | 0    | 0    | 1  | 0   | 0    | 0    | 0    | 0    | 270.46 | 16        |
| <b>AROMATIC COMPOUNDS - examples</b>     |      |      |     |      |      |      |      |     |      |      |      |    |     |      |      |      |      |        |           |
| benzene                                  | 0    | 1    | 0   | 0    | 0    | 0    | 0    | 0   | 0    | 0    | 0    | 5  | 0   | 0    | 0    | 0    | 0    | 78.11  | 1         |
| nitrobenzene                             | 0    | 1    | 0   | 0    | 0    | 0    | 0    | 0   | 0    | 0    | 0    | 5  | 0   | 0    | 0    | 0    | 0    | 123.11 | 1         |
| aniline {aminobenzene}                   | 0    | 0    | 0   | 0    | 0.75 | 0    | 0    | 0   | 0    | 0    | 0    | 0  | 0   | 0    | 0    | 0    | 0    | 93.13  | 6         |
| toluene                                  | 0    | 0    | 0   | 1    | 0    | 0    | 0    | 0   | 0    | 0    | 0    | 0  | 0   | 0    | 0    | 0    | 0    | 92.14  | 7         |
| methylphenanthrenes                      | 0    | 0    | 0   | 1    | 0    | 0    | 0    | 0   | 0    | 0    | 0    | 8  | 0   | 0    | 0    | 0    | 0    | 192.26 | 7         |
| c2 alkylphenanthrenes                    | 0    | 0    | 0   | 1    | 0    | 0    | 0    | 0   | 0    | 0    | 0    | 3  | 0   | 0    | 0    | 0    | 0    | 206.28 | 7         |
| c2 alkylanthracenes                      | 0    | 0    | 0   | 1    | 0    | 0    | 0    | 0   | 0    | 0    | 0    | 3  | 0   | 0    | 0    | 0    | 0    | 206.28 | 7         |
| biphenyl {phenyl benzene}                | 0    | 0    | 0   | 1    | 0    | 0    | 0    | 0   | 0    | 0    | 0    | 5  | 0   | 0    | 0    | 0    | 0    | 154.21 | 7         |
| o-xylene                                 | 0    | 0    | 0   | 0    | 1    | 0    | 0    | 0   | 0    | 0    | 0    | 0  | 0   | 0    | 0    | 0    | 0    | 106.17 | 8         |
| m-xylene                                 | 0    | 0    | 0   | 0    | 1    | 0    | 0    | 0   | 0    | 0    | 0    | 0  | 0   | 0    | 0    | 0    | 0    | 106.17 | 8         |
| p-xylene                                 | 0    | 0    | 0   | 0    | 1    | 0    | 0    | 0   | 0    | 0    | 0    | 0  | 0   | 0    | 0    | 0    | 0    | 106.17 | 8         |
| m-xylene and p-xylene                    | 0    | 0    | 0   | 0    | 1    | 0    | 0    | 0   | 0    | 0    | 0    | 0  | 0   | 0    | 0    | 0    | 0    | 106.17 | 8         |
| benzo[ghi]fluoranthene                   | 0    | 0    | 0   | 0    | 1    | 0    | 0    | 0   | 0    | 0    | 0    | 10 | 0   | 0    | 0    | 0    | 0    | 226.28 | 8         |
| benzo(a)anthracene                       | 0    | 0    | 0   | 0    | 1    | 0    | 0    | 0   | 0    | 0    | 0    | 10 | 0   | 0    | 0    | 0    | 0    | 228.29 | 8         |
| chrysene                                 | 0    | 0    | 0   | 0    | 1    | 0    | 0    | 0   | 0    | 0    | 0    | 10 | 0   | 0    | 0    | 0    | 0    | 228.29 | 8         |
| benzo(c)phenanthrene                     | 0    | 0    | 0   | 0    | 1    | 0    | 0    | 0   | 0    | 0    | 0    | 10 | 0   | 0    | 0    | 0    | 0    | 228.29 | 8         |
| methylbenzphenanthrene                   | 0    | 0    | 0   | 0    | 1    | 0    | 0    | 0   | 0    | 0    | 0    | 11 | 0   | 0    | 0    | 0    | 0    | 242.32 | 8         |
| styrene                                  | 0    | 0    | 0.5 | 1    | 0    | 0    | 0    | 0   | 0    | 0    | 0    | 0  | 0   | 0    | 0    | 0    | 0    | 104.15 | 8         |
| methylbenzanthracenes                    | 0    | 0    | 0   | 0    | 1    | 0    | 0    | 0   | 0    | 0    | 0    | 11 | 0   | 0    | 0    | 0    | 0    | 242.32 | 8         |
| isomers of xylene                        | 0    | 0.25 | 0   | 0.25 | 0.75 | 0    | 0    | 0   | 0    | 0    | 0    | 0  | 0   | 0    | 0    | 0    | 0    | 106.17 | 8         |
| ethylbenzene                             | 0    | 1    | 0   | 1    | 0    | 0    | 0    | 0   | 0    | 0    | 0    | 0  | 0   | 0    | 0    | 0    | 0    | 106.17 | 8         |
| methyl biphenyl (mixed) {phenyltoluene}  | 0    | 0    | 0   | 0    | 1    | 0    | 0    | 0   | 0    | 0    | 0    | 5  | 0   | 0    | 0    | 0    | 0    | 168.24 | 8         |
| methylchrysenes                          | 0    | 0    | 0   | 0    | 1    | 0    | 0    | 0   | 0    | 0    | 0    | 11 | 0   | 0    | 0    | 0    | 0    | 242.32 | 8         |
| indene                                   | 0    | 0    | 0.5 | 0    | 1    | 0    | 0    | 0   | 0    | 0    | 0    | 0  | 0   | 0    | 0    | 0    | 0    | 116.16 | 9         |
| 1,3,5-trimethylbenzene                   | 0    | 1    | 0   | 0    | 1    | 0    | 0    | 0   | 0    | 0    | 0    | 0  | 0   | 0    | 0    | 0    | 0    | 120.2  | 9         |
| 1,2,4-trimethylbenzene                   | 0    | 1    | 0   | 0    | 1    | 0    | 0    | 0   | 0    | 0    | 0    | 0  | 0   | 0    | 0    | 0    | 0    | 120.2  | 9         |
| 1,2,3-trimethylbenzene                   | 0    | 1    | 0   | 0    | 1    | 0    | 0    | 0   | 0    | 0    | 0    | 0  | 0   | 0    | 0    | 0    | 0    | 120.2  | 9         |
| trimethylbenzenes                        | 0    | 1    | 0   | 0    | 1    | 0    | 0    | 0   | 0    | 0    | 0    | 0  | 0   | 0    | 0    | 0    | 0    | 120.2  | 9         |
| ethyltoluenes {methylethylbenzenes}      | 0    | 1    | 0   | 0    | 1    | 0    | 0    | 0   | 0    | 0    | 0    | 0  | 0   | 0    | 0    | 0    | 0    | 120.2  | 9         |
| o-ethyltoluene                           | 0    | 1    | 0   | 0    | 1    | 0    | 0    | 0   | 0    | 0    | 0    | 0  | 0   | 0    | 0    | 0    | 0    | 120.2  | 9         |
| m-ethyltoluene                           | 0    | 1    | 0   | 0    | 1    | 0    | 0    | 0   | 0    | 0    | 0    | 0  | 0   | 0    | 0    | 0    | 0    | 120.2  | 9         |
| p-ethyltoluene                           | 0    | 1    | 0   | 0    | 1    | 0    | 0    | 0   | 0    | 0    | 0    | 0  | 0   | 0    | 0    | 0    | 0    | 120.2  | 9         |
| c9 alkyl benzenes                        | 0    | 1.38 | 0   | 0.38 | 0.62 | 0    | 0    | 0   | 0    | 0    | 0    | 0  | 0   | 0    | 0    | 0    | 0    | 120.2  | 9         |
| t-butylbenzene                           | 0    | 2    | 0   | 1    | 0    | 0    | 0    | 0   | 0    | 0    | 0    | 1  | 0   | 0    | 0    | 0    | 0    | 134.22 | 9         |
| Isomers of propylbenzene                 | 0    | 2    | 0   | 1    | 0    | 0    | 0    | 0   | 0    | 0    | 0    | 0  | 0   | 0    | 0    | 0    | 0    | 120.2  | 9         |
| n-propylbenzene                          | 0    | 2    | 0   | 1    | 0    | 0    | 0    | 0   | 0    | 0    | 0    | 0  | 0   | 0    | 0    | 0    | 0    | 120.2  | 9         |
| cumene (isopropyl benzene)               | 0    | 2    | 0   | 1    | 0    | 0    | 0    | 0   | 0    | 0    | 0    | 0  | 0   | 0    | 0    | 0    | 0    | 120.2  | 9         |
| methyl styrene (mixed) {vinyl toluene}   | 0    | 0    | 1   | 1    | 0    | 0    | 0    | 0   | 0    | 0    | 0    | 0  | 0   | 0    | 0    | 0    | 0    | 118.18 | 9         |

Table 1. Matrix of Assignments from Real Compounds to Carbon Bond 05 (CB05) Model Species

| name                                        | NASN | PAR  | OLE | TOL  | XYL  | FORM | ALD2 | ETH | ISOP | MEOH | ETOH | NR  | CH4 | ETHA | IOLE | ALDX | TERP | MW     | # carbons |
|---------------------------------------------|------|------|-----|------|------|------|------|-----|------|------|------|-----|-----|------|------|------|------|--------|-----------|
| indan                                       | 0    | 1    | 0   | 0    | 1    | 0    | 0    | 0   | 0    | 0    | 0    | 0   | 0   | 0    | 0    | 0    | 0    | 118.18 | 9         |
| cumene hydroperoxide                        | 0    | 2    | 0   | 1    | 0    | 0    | 0    | 0   | 0    | 0    | 0    | 0   | 0   | 0    | 0    | 0    | 0    | 152.19 | 9         |
| Butylbenzene isomers                        | 0    | 2.9  | 0   | 1    | 0    | 0    | 0    | 0   | 0    | 0    | 0    | 0.1 | 0   | 0    | 0    | 0    | 0    | 134.22 | 9.9       |
| c3/c4/c5 alkylbenzenes                      | 0    | 2.25 | 0   | 0.32 | 0.68 | 0    | 0    | 0   | 0    | 0    | 0    | 0   | 0   | 0    | 0    | 0    | 0    | 133.24 | 9.93      |
| methylindans                                | 0    | 2    | 0   | 0    | 1    | 0    | 0    | 0   | 0    | 0    | 0    | 0   | 0   | 0    | 0    | 0    | 0    | 132.21 | 10        |
| camphene                                    | 0    | 0    | 0   | 0    | 0    | 0    | 0    | 0   | 0    | 0    | 0    | 0   | 0   | 0    | 0    | 0    | 1    | 136.24 | 10        |
| methylindene                                | 0    | 0    | 1   | 0    | 1    | 0    | 0    | 0   | 0    | 0    | 0    | 0   | 0   | 0    | 0    | 0    | 0    | 130.19 | 10        |
| divinyl benzene {vinyl styrene}             | 0    | 0    | 1   | 0    | 1    | 0    | 0    | 0   | 0    | 0    | 0    | 0   | 0   | 0    | 0    | 0    | 0    | 130.19 | 10        |
| 1,3-diethylbenzene (meta)                   | 0    | 2    | 0   | 0    | 1    | 0    | 0    | 0   | 0    | 0    | 0    | 0   | 0   | 0    | 0    | 0    | 0    | 134.22 | 10        |
| 1,2-diethylbenzene (ortho)                  | 0    | 2    | 0   | 0    | 1    | 0    | 0    | 0   | 0    | 0    | 0    | 0   | 0   | 0    | 0    | 0    | 0    | 134.22 | 10        |
| 1,2,3,4-tetramethylbenzene                  | 0    | 2    | 0   | 0    | 1    | 0    | 0    | 0   | 0    | 0    | 0    | 0   | 0   | 0    | 0    | 0    | 0    | 134.22 | 10        |
| ethyl dimethylbenzenes                      | 0    | 2    | 0   | 0    | 1    | 0    | 0    | 0   | 0    | 0    | 0    | 0   | 0   | 0    | 0    | 0    | 0    | 134.22 | 10        |
| tetramethylbenzenes                         | 0    | 2    | 0   | 0    | 1    | 0    | 0    | 0   | 0    | 0    | 0    | 0   | 0   | 0    | 0    | 0    | 0    | 134.22 | 10        |
| 1-methyl-2-tert-butylbenzene                | 0    | 2    | 0   | 0    | 1    | 0    | 0    | 0   | 0    | 0    | 0    | 1   | 0   | 0    | 0    | 0    | 0    | 148.25 | 10        |
| 1-methyl-4-isopropylbenzene                 | 0    | 2    | 0   | 0    | 1    | 0    | 0    | 0   | 0    | 0    | 0    | 0   | 0   | 0    | 0    | 0    | 0    | 134.22 | 10        |
| 1-methyl-3n-propylbenzene                   | 0    | 2    | 0   | 0    | 1    | 0    | 0    | 0   | 0    | 0    | 0    | 0   | 0   | 0    | 0    | 0    | 0    | 134.22 | 10        |
| 1-methyl-3-isopropylbenzene                 | 0    | 2    | 0   | 0    | 1    | 0    | 0    | 0   | 0    | 0    | 0    | 0   | 0   | 0    | 0    | 0    | 0    | 134.22 | 10        |
| naphthalene                                 | 0    | 2    | 0   | 0    | 1    | 0    | 0    | 0   | 0    | 0    | 0    | 0   | 0   | 0    | 0    | 0    | 0    | 128.17 | 10        |
| dihydronaphthalene                          | 0    | 2    | 0   | 0    | 1    | 0    | 0    | 0   | 0    | 0    | 0    | 0   | 0   | 0    | 0    | 0    | 0    | 130.19 | 10        |
| 1-methyl naphthalene                        | 0    | 2    | 0   | 0    | 1    | 0    | 0    | 0   | 0    | 0    | 0    | 1   | 0   | 0    | 0    | 0    | 0    | 142.2  | 10        |
| diethylbenzenes                             | 0    | 2    | 0   | 0    | 1    | 0    | 0    | 0   | 0    | 0    | 0    | 0   | 0   | 0    | 0    | 0    | 0    | 134.22 | 10        |
| (1-methylpropyl)benzene (sec-butyl benzene) | 0    | 3    | 0   | 1    | 0    | 0    | 0    | 0   | 0    | 0    | 0    | 0   | 0   | 0    | 0    | 0    | 0    | 134.22 | 10        |
| n-butylbenzene                              | 0    | 3    | 0   | 1    | 0    | 0    | 0    | 0   | 0    | 0    | 0    | 0   | 0   | 0    | 0    | 0    | 0    | 134.22 | 10        |
| (2-methylpropyl)benzene                     | 0    | 3    | 0   | 1    | 0    | 0    | 0    | 0   | 0    | 0    | 0    | 0   | 0   | 0    | 0    | 0    | 0    | 134.22 | 10        |
| ethyl styrene {ethylvinyl benzene}          | 0    | 1    | 1   | 1    | 0    | 0    | 0    | 0   | 0    | 0    | 0    | 0   | 0   | 0    | 0    | 0    | 0    | 132.21 | 10        |
| c4 alkylstyrenes                            | 0    | 1    | 1   | 1    | 0    | 0    | 0    | 0   | 0    | 0    | 0    | 2   | 0   | 0    | 0    | 0    | 0    | 160.26 | 10        |
| 1,3-diethylbenzene (meta)                   | 0    | 2    | 0   | 0    | 1    | 0    | 0    | 0   | 0    | 0    | 0    | 0   | 0   | 0    | 0    | 0    | 0    | 134.22 | 10        |
| 1,2-diethylbenzene (ortho)                  | 0    | 2    | 0   | 0    | 1    | 0    | 0    | 0   | 0    | 0    | 0    | 0   | 0   | 0    | 0    | 0    | 0    | 134.22 | 10        |
| c10 aromatics                               | 0    | 2.25 | 0   | 0.25 | 0.75 | 0    | 0    | 0   | 0    | 0    | 0    | 0   | 0   | 0    | 0    | 0    | 0    | 134.22 | 10        |
| methylnaphthalenes                          | 0    | 2.5  | 0   | 0    | 1    | 0    | 0    | 0   | 0    | 0    | 0    | 0.5 | 0   | 0    | 0    | 0    | 0    | 142.2  | 10.5      |
| dimethylindans                              | 0    | 3    | 0   | 0    | 1    | 0    | 0    | 0   | 0    | 0    | 0    | 0   | 0   | 0    | 0    | 0    | 0    | 146.23 | 11        |
| dimethylindene                              | 0    | 1    | 1   | 0    | 1    | 0    | 0    | 0   | 0    | 0    | 0    | 0   | 0   | 0    | 0    | 0    | 0    | 144.22 | 11        |
| c3 alkylstyrene                             | 0    | 1    | 1   | 0    | 1    | 0    | 0    | 0   | 0    | 0    | 0    | 0   | 0   | 0    | 0    | 0    | 0    | 146.23 | 11        |
| c11 unsaturated alkylbenzenes               | 0    | 1    | 1   | 0    | 1    | 0    | 0    | 0   | 0    | 0    | 0    | 0   | 0   | 0    | 0    | 0    | 0    | 146.23 | 11        |
| 1-(1,1-dimethylethyl)-3,5-dimethylbenzene   | 0    | 3    | 0   | 0    | 1    | 0    | 0    | 0   | 0    | 0    | 0    | 1   | 0   | 0    | 0    | 0    | 0    | 162.28 | 11        |
| methoxynaphthalene                          | 0    | 3    | 0   | 0    | 1    | 0    | 0    | 0   | 0    | 0    | 0    | 0   | 0   | 0    | 0    | 0    | 0    | 158.2  | 11        |
| methyldihydronaphthalene                    | 0    | 3    | 0   | 0    | 1    | 0    | 0    | 0   | 0    | 0    | 0    | 0   | 0   | 0    | 0    | 0    | 0    | 144.22 | 11        |
| c11 alkylbenzenes                           | 0    | 3.33 | 0   | 0.33 | 0.67 | 0    | 0    | 0   | 0    | 0    | 0    | 0   | 0   | 0    | 0    | 0    | 0    | 148.25 | 11        |
| n-pentylbenzene                             | 0    | 4    | 0   | 1    | 0    | 0    | 0    | 0   | 0    | 0    | 0    | 0   | 0   | 0    | 0    | 0    | 0    | 148.25 | 11        |
| c2 alkyl indan                              | 0    | 3    | 0   | 0    | 1    | 0    | 0    | 0   | 0    | 0    | 0    | 0   | 0   | 0    | 0    | 0    | 0    | 146.23 | 11        |
| ethylindan                                  | 0    | 3    | 0   | 0    | 1    | 0    | 0    | 0   | 0    | 0    | 0    | 0   | 0   | 0    | 0    | 0    | 0    | 146.23 | 11        |
| diisopropyl benzene (mixed isomers)         | 0    | 4    | 0   | 0    | 1    | 0    | 0    | 0   | 0    | 0    | 0    | 0   | 0   | 0    | 0    | 0    | 0    | 162.28 | 12        |
| acenaphthylene                              | 0    | 0    | 2   | 0    | 1    | 0    | 0    | 0   | 0    | 0    | 0    | 0   | 0   | 0    | 0    | 0    | 0    | 152.2  | 12        |
| c2 alkyl naphthalene                        | 0    | 4    | 0   | 0    | 1    | 0    | 0    | 0   | 0    | 0    | 0    | 0   | 0   | 0    | 0    | 0    | 0    | 156.23 | 12        |
| acenaphthene                                | 0    | 4    | 0   | 0    | 1    | 0    | 0    | 0   | 0    | 0    | 0    | 0   | 0   | 0    | 0    | 0    | 0    | 154.21 | 12        |
| c12 dialkyl benzenes                        | 0    | 4    | 0   | 0    | 1    | 0    | 0    | 0   | 0    | 0    | 0    | 0   | 0   | 0    | 0    | 0    | 0    | 162.28 | 12        |
| dimethyl naphthalenes                       | 0    | 4    | 0   | 0    | 1    | 0    | 0    | 0   | 0    | 0    | 0    | 0   | 0   | 0    | 0    | 0    | 0    | 156.23 | 12        |

Table 1. Matrix of Assignments from Real Compounds to Carbon Bond 05 (CB05) Model Species

| name                                        | NASN | PAR  | OLE | TOL  | XYL  | FORM | ALD2 | ETH | ISOP | MEOH | ETOH | NR | CH4 | ETHA | IOLE | ALDX | TERP | MW     | # carbons |
|---------------------------------------------|------|------|-----|------|------|------|------|-----|------|------|------|----|-----|------|------|------|------|--------|-----------|
| ethylnaphthalenes                           | 0    | 4    | 0   | 0    | 1    | 0    | 0    | 0   | 0    | 0    | 0    | 0  | 0   | 0    | 0    | 0    | 0    | 156.23 | 12        |
| trimethylindan                              | 0    | 4    | 0   | 0    | 1    | 0    | 0    | 0   | 0    | 0    | 0    | 0  | 0   | 0    | 0    | 0    | 0    | 160.26 | 12        |
| propylnaphthalene                           | 0    | 5    | 0   | 0    | 1    | 0    | 0    | 0   | 0    | 0    | 0    | 0  | 0   | 0    | 0    | 0    | 0    | 170.26 | 13        |
| trimethylnaphthalene                        | 0    | 5    | 0   | 0    | 1    | 0    | 0    | 0   | 0    | 0    | 0    | 0  | 0   | 0    | 0    | 0    | 0    | 170.26 | 13        |
| fluorene                                    | 0    | 5    | 0   | 0    | 1    | 0    | 0    | 0   | 0    | 0    | 0    | 0  | 0   | 0    | 0    | 0    | 0    | 166.22 | 13        |
| c13 alkyl benzenes                          | 0    | 5.33 | 0   | 0.33 | 0.67 | 0    | 0    | 0   | 0    | 0    | 0    | 0  | 0   | 0    | 0    | 0    | 0    | 176.3  | 13        |
| anthracene                                  | 0    | 2    | 2   | 0    | 1    | 0    | 0    | 0   | 0    | 0    | 0    | 0  | 0   | 0    | 0    | 0    | 0    | 178.23 | 14        |
| diphenyl ethane {bibenzyl}                  | 0    | 0    | 0   | 2    | 0    | 0    | 0    | 0   | 0    | 0    | 0    | 0  | 0   | 0    | 0    | 0    | 0    | 182.27 | 14        |
| methylanthalenes                            | 0    | 0    | 0   | 1    | 1    | 0    | 0    | 0   | 0    | 0    | 0    | 0  | 0   | 0    | 0    | 0    | 0    | 192.26 | 15        |
| fluoranthene                                | 0    | 0    | 0   | 0    | 2    | 0    | 0    | 0   | 0    | 0    | 0    | 0  | 0   | 0    | 0    | 0    | 0    | 202.26 | 16        |
| pyrene                                      | 0    | 0    | 0   | 0    | 2    | 0    | 0    | 0   | 0    | 0    | 0    | 0  | 0   | 0    | 0    | 0    | 0    | 202.26 | 16        |
| cyclopentaphenanthrenes                     | 0    | 0    | 0   | 0    | 2    | 0    | 0    | 0   | 0    | 0    | 0    | 0  | 0   | 0    | 0    | 0    | 0    | 204.27 | 16        |
| cyclopentaanthracenes                       | 0    | 0    | 0   | 0    | 2    | 0    | 0    | 0   | 0    | 0    | 0    | 0  | 0   | 0    | 0    | 0    | 0    | 204.27 | 16        |
| phenylnaphthalenes                          | 0    | 1    | 0   | 1    | 1    | 0    | 0    | 0   | 0    | 0    | 0    | 0  | 0   | 0    | 0    | 0    | 0    | 204.27 | 16        |
| ethyl-phenyl-phenyl-ethane                  | 0    | 1    | 0   | 1    | 1    | 0    | 0    | 0   | 0    | 0    | 0    | 0  | 0   | 0    | 0    | 0    | 0    | 210.32 | 16        |
| methylfluoranthenes                         | 0    | 1    | 0   | 0    | 2    | 0    | 0    | 0   | 0    | 0    | 0    | 0  | 0   | 0    | 0    | 0    | 0    | 216.28 | 17        |
| di(ethylphenyl)ethane                       | 0    | 4    | 0   | 2    | 0    | 0    | 0    | 0   | 0    | 0    | 0    | 0  | 0   | 0    | 0    | 0    | 0    | 238.37 | 18        |
| cyclopenta[cd]pyrene                        | 0    | 2    | 0   | 0    | 2    | 0    | 0    | 0   | 0    | 0    | 0    | 0  | 0   | 0    | 0    | 0    | 0    | 228.29 | 18        |
| <b>HALOGENATED COMPOUNDS - examples</b>     |      |      |     |      |      |      |      |     |      |      |      |    |     |      |      |      |      |        |           |
| methyl chloride                             | 0    | 0    | 0   | 0    | 0    | 0    | 0    | 0   | 0    | 0    | 0    | 1  | 0   | 0    | 0    | 0    | 0    | 50.49  | 0         |
| carbon tetrachloride                        | 0    | 0    | 0   | 0    | 0    | 0    | 0    | 0   | 0    | 0    | 0    | 1  | 0   | 0    | 0    | 0    | 0    | 153.82 | 0         |
| dichlorodifluoromethane (f-12)              | 0    | 0    | 0   | 0    | 0    | 0    | 0    | 0   | 0    | 0    | 0    | 1  | 0   | 0    | 0    | 0    | 0    | 120.91 | 0         |
| chlorotrifluoromethane (f-13)               | 0    | 0    | 0   | 0    | 0    | 0    | 0    | 0   | 0    | 0    | 0    | 1  | 0   | 0    | 0    | 0    | 0    | 104.46 | 0         |
| 1,1-dichloroethane                          | 0    | 0    | 0   | 0    | 0    | 0    | 0    | 0   | 0    | 0    | 0    | 2  | 0   | 0    | 0    | 0    | 0    | 98.96  | 0         |
| 1,1,1-trichloroethane                       | 0    | 0    | 0   | 0    | 0    | 0    | 0    | 0   | 0    | 0    | 0    | 2  | 0   | 0    | 0    | 0    | 0    | 133.41 | 0         |
| 1,1,2-trichloroethane                       | 0    | 0    | 0   | 0    | 0    | 0    | 0    | 0   | 0    | 0    | 0    | 2  | 0   | 0    | 0    | 0    | 0    | 133.41 | 0         |
| dichlorotetrafluoroethane                   | 0    | 0    | 0   | 0    | 0    | 0    | 0    | 0   | 0    | 0    | 0    | 2  | 0   | 0    | 0    | 0    | 0    | 170.92 | 0         |
| ethyl chloride                              | 0    | 0    | 0   | 0    | 0    | 0    | 0    | 0   | 0    | 0    | 0    | 2  | 0   | 0    | 0    | 0    | 0    | 64.52  | 0         |
| ethylene dichloride                         | 0    | 0    | 0   | 0    | 0    | 0    | 0    | 0   | 0    | 0    | 0    | 2  | 0   | 0    | 0    | 0    | 0    | 98.96  | 0         |
| chloropentafluoroethane (f115)              | 0    | 0    | 0   | 0    | 0    | 0    | 0    | 0   | 0    | 0    | 0    | 2  | 0   | 0    | 0    | 0    | 0    | 154.47 | 0         |
| hexafluoroethane {f-116}                    | 0    | 0    | 0   | 0    | 0    | 0    | 0    | 0   | 0    | 0    | 0    | 2  | 0   | 0    | 0    | 0    | 0    | 138.01 | 0         |
| methylene bromide                           | 0    | 0    | 0   | 0    | 0    | 0    | 0    | 0   | 0    | 0    | 0    | 1  | 0   | 0    | 0    | 0    | 0    | 173.85 | 0         |
| ethylene dibromide                          | 0    | 0    | 0   | 0    | 0    | 0    | 0    | 0   | 0    | 0    | 0    | 2  | 0   | 0    | 0    | 0    | 0    | 187.87 | 0         |
| methyl bromide                              | 0    | 0    | 0   | 0    | 0    | 0    | 0    | 0   | 0    | 0    | 0    | 1  | 0   | 0    | 0    | 0    | 0    | 94.94  | 0         |
| 1,2-dichloro-1,1,2,2-tetrafluoroethane {cf} | 0    | 0    | 0   | 0    | 0    | 0    | 0    | 0   | 0    | 0    | 0    | 2  | 0   | 0    | 0    | 0    | 0    | 170.92 | 0         |
| chlorodifluoromethane (f-22)                | 0    | 0    | 0   | 0    | 0    | 0    | 0    | 0   | 0    | 0    | 0    | 1  | 0   | 0    | 0    | 0    | 0    | 86.47  | 0         |
| trifluoromethane (f-23)                     | 0    | 0    | 0   | 0    | 0    | 0    | 0    | 0   | 0    | 0    | 0    | 1  | 0   | 0    | 0    | 0    | 0    | 70.01  | 0         |
| chlorofluorohydrocarbons                    | 0    | 0    | 0   | 0    | 0    | 0    | 0    | 0   | 0    | 0    | 0    | 2  | 0   | 0    | 0    | 0    | 0    | 187.38 | 0         |
| trichlorotrifluoroethane-f113               | 0    | 0    | 0   | 0    | 0    | 0    | 0    | 0   | 0    | 0    | 0    | 2  | 0   | 0    | 0    | 0    | 0    | 187.38 | 0         |
| chloroform                                  | 0    | 0    | 0   | 0    | 0    | 0    | 0    | 0   | 0    | 0    | 0    | 1  | 0   | 0    | 0    | 0    | 0    | 119.38 | 0         |
| trichlorofluoromethane                      | 0    | 0    | 0   | 0    | 0    | 0    | 0    | 0   | 0    | 0    | 0    | 1  | 0   | 0    | 0    | 0    | 0    | 137.37 | 0         |
| Iodomethane                                 | 0    | 0    | 0   | 0    | 0    | 0    | 0    | 0   | 0    | 0    | 0    | 1  | 0   | 0    | 0    | 0    | 0    | 141.94 | 0         |
| dichloromethane {methylene chloride}        | 0    | 0    | 0   | 0    | 0    | 0    | 0    | 0   | 0    | 0    | 0    | 1  | 0   | 0    | 0    | 0    | 0    | 84.93  | 0         |
| tetrafluoromethane {carbon tetrafluoride}   | 0    | 0    | 0   | 0    | 0    | 0    | 0    | 0   | 0    | 0    | 0    | 1  | 0   | 0    | 0    | 0    | 0    | 88     | 0         |
| perchloroethylene                           | 0    | 0    | 0   | 0    | 0    | 0    | 0    | 0   | 0    | 0    | 0    | 2  | 0   | 0    | 0    | 0    | 0    | 165.83 | 0         |
| 2,2-dichloronitroaniline                    | 0    | 1    | 0   | 0    | 0    | 0    | 0    | 0   | 0    | 0    | 0    | 5  | 0   | 0    | 0    | 0    | 0    | 207.02 | 1         |

**Table 1. Matrix of Assignments from Real Compounds to Carbon Bond 05 (CB05) Model Species**

| name                                            | NASN | PAR | OLE | TOL | XYL | FORM | ALD2 | ETH | ISOP | MEOH | ETOH | NR  | CH4 | ETHA | IOLE | ALDX | TERP | MW     | # carbons |
|-------------------------------------------------|------|-----|-----|-----|-----|------|------|-----|------|------|------|-----|-----|------|------|------|------|--------|-----------|
| bromodinitroaniline {2,4-dinitro-6-bromoan      | 0    | 1   | 0   | 0   | 0   | 0    | 0    | 0   | 0    | 0    | 0    | 5   | 0   | 0    | 0    | 0    | 0    | 262.03 | 1         |
| bromodinitrobenzene                             | 0    | 1   | 0   | 0   | 0   | 0    | 0    | 0   | 0    | 0    | 0    | 5   | 0   | 0    | 0    | 0    | 0    | 247.01 | 1         |
| chlorobenzene                                   | 0    | 1   | 0   | 0   | 0   | 0    | 0    | 0   | 0    | 0    | 0    | 5   | 0   | 0    | 0    | 0    | 0    | 112.56 | 1         |
| o-dichlorobenzene                               | 0    | 1   | 0   | 0   | 0   | 0    | 0    | 0   | 0    | 0    | 0    | 5   | 0   | 0    | 0    | 0    | 0    | 147    | 1         |
| 1,3-dichlorobenzene {m-dichlorobenzene}         | 0    | 1   | 0   | 0   | 0   | 0    | 0    | 0   | 0    | 0    | 0    | 5   | 0   | 0    | 0    | 0    | 0    | 147    | 1         |
| p-dichlorobenzene                               | 0    | 1   | 0   | 0   | 0   | 0    | 0    | 0   | 0    | 0    | 0    | 5   | 0   | 0    | 0    | 0    | 0    | 147    | 1         |
| dichlorobenzenes                                | 0    | 1   | 0   | 0   | 0   | 0    | 0    | 0   | 0    | 0    | 0    | 5   | 0   | 0    | 0    | 0    | 0    | 147    | 1         |
| trichlorobenzenes (mixed)                       | 0    | 1   | 0   | 0   | 0   | 0    | 0    | 0   | 0    | 0    | 0    | 5   | 0   | 0    | 0    | 0    | 0    | 181.45 | 1         |
| tetrachlorobenzenes                             | 0    | 1   | 0   | 0   | 0   | 0    | 0    | 0   | 0    | 0    | 0    | 5   | 0   | 0    | 0    | 0    | 0    | 215.89 | 1         |
| propylene dichloride                            | 0    | 1.5 | 0   | 0   | 0   | 0    | 0    | 0   | 0    | 0    | 0    | 1.5 | 0   | 0    | 0    | 0    | 0    | 112.99 | 1.5       |
| 1,3-Dichloropropane                             | 0    | 1.5 | 0   | 0   | 0   | 0    | 0    | 0   | 0    | 0    | 0    | 1.5 | 0   | 0    | 0    | 0    | 0    | 112.99 | 1.5       |
| vinyl chloride                                  | 0    | 0   | 0   | 0   | 0   | 0    | 0    | 1   | 0    | 0    | 0    | 0   | 0   | 0    | 0    | 0    | 0    | 62.5   | 2         |
| 1,1-dichloroethene {vinylidene chloride}        | 0    | 2   | 0   | 0   | 0   | 0    | 0    | 0   | 0    | 0    | 0    | 0   | 0   | 0    | 0    | 0    | 0    | 96.94  | 2         |
| trichloroethylene (tce)                         | 0    | 0   | 0   | 0   | 0   | 0    | 0    | 1   | 0    | 0    | 0    | 0   | 0   | 0    | 0    | 0    | 0    | 131.39 | 2         |
| Chloropropane                                   | 0    | 3   | 0   | 0   | 0   | 0    | 0    | 0   | 0    | 0    | 0    | 0   | 0   | 0    | 0    | 0    | 0    | 78.54  | 3         |
| epichlorohydrin                                 | 0    | 3   | 0   | 0   | 0   | 0    | 0    | 0   | 0    | 0    | 0    | 0   | 0   | 0    | 0    | 0    | 0    | 92.53  | 3         |
| Glycerol alpha-monochlorohydrin                 | 0    | 3   | 0   | 0   | 0   | 0    | 0    | 0   | 0    | 0    | 0    | 0   | 0   | 0    | 0    | 0    | 0    | 110.54 | 3         |
| chloroprene (2-chloro-1,3-butadiene)            | 0    | 0   | 2   | 0   | 0   | 0    | 0    | 0   | 0    | 0    | 0    | 0   | 0   | 0    | 0    | 0    | 0    | 88.54  | 4         |
| 1-chlorobutane                                  | 0    | 4   | 0   | 0   | 0   | 0    | 0    | 0   | 0    | 0    | 0    | 0   | 0   | 0    | 0    | 0    | 0    | 92.57  | 4         |
| benzyl chloride                                 | 0    | 0   | 0   | 1   | 0   | 0    | 0    | 0   | 0    | 0    | 0    | 0   | 0   | 0    | 0    | 0    | 0    | 126.59 | 7         |
| Benzoyl chloride                                | 0    | 0   | 0   | 1   | 0   | 0    | 0    | 0   | 0    | 0    | 0    | 0   | 0   | 0    | 0    | 0    | 0    | 140.57 | 7         |
| 3-(chloromethyl)-heptane                        | 0    | 8   | 0   | 0   | 0   | 0    | 0    | 0   | 0    | 0    | 0    | 0   | 0   | 0    | 0    | 0    | 0    | 148.68 | 8         |
| <b>NITROGEN containing compounds - examples</b> |      |     |     |     |     |      |      |     |      |      |      |     |     |      |      |      |      |        |           |
| nitroethane                                     | 0    | 0.4 | 0   | 0   | 0   | 0    | 0    | 0   | 0    | 0    | 0    | 1.6 | 0   | 0    | 0    | 0    | 0    | 75.07  | 0.4       |
| methylamine                                     | 0    | 0   | 0   | 0   | 0   | 0    | 0    | 0   | 0    | 0    | 0    | 0   | 0   | 0    | 0    | 0.5  | 0    | 31.06  | 1         |
| pyridine                                        | 0    | 1   | 0   | 0   | 0   | 0    | 0    | 0   | 0    | 0    | 0    | 4   | 0   | 0    | 0    | 0    | 0    | 79.1   | 1         |
| phenyl isocyanate                               | 0    | 1   | 0   | 0   | 0   | 0    | 0    | 0   | 0    | 0    | 0    | 6   | 0   | 0    | 0    | 0    | 0    | 119.12 | 1         |
| acetonitrile                                    | 0    | 1   | 0   | 0   | 0   | 0    | 0    | 0   | 0    | 0    | 0    | 1   | 0   | 0    | 0    | 0    | 0    | 41.05  | 1         |
| hydroxyacetonitrile                             | 0    | 1   | 0   | 0   | 0   | 0    | 0    | 0   | 0    | 0    | 0    | 1   | 0   | 0    | 0    | 0    | 0    | 57.05  | 1         |
| Monomethyl Hydrazine                            | 0    | 1   | 0   | 0   | 0   | 0    | 0    | 0   | 0    | 0    | 0    | 0   | 0   | 0    | 0    | 0    | 0    | 46.07  | 1         |
| Nitropropanes                                   | 0    | 1.5 | 0   | 0   | 0   | 0    | 0    | 0   | 0    | 0    | 0    | 1.5 | 0   | 0    | 0    | 0    | 0    | 89.09  | 1.5       |
| dimethyl formamide                              | 0    | 2   | 0   | 0   | 0   | 0    | 0    | 0   | 0    | 0    | 0    | 1   | 0   | 0    | 0    | 0    | 0    | 73.1   | 2         |
| ethylene diamine                                | 0    | 0   | 0   | 0   | 0   | 0    | 0    | 1   | 0    | 0    | 0    | 0   | 0   | 0    | 0    | 0    | 0    | 60.1   | 2         |
| ethanolamine                                    | 0    | 0   | 0   | 0   | 0   | 0    | 0    | 0   | 0    | 0    | 0    | 0   | 0   | 0    | 0    | 1    | 0    | 61.08  | 2         |
| ethylamine                                      | 0    | 0   | 0   | 0   | 0   | 0    | 0    | 0   | 0    | 0    | 0    | 0   | 0   | 0    | 0    | 1    | 0    | 45.09  | 2         |
| dimethylamine                                   | 0    | 0   | 0   | 0   | 0   | 0    | 0    | 0   | 0    | 0    | 0    | 0   | 0   | 0    | 0    | 1    | 0    | 45.09  | 2         |
| ethyleneamines                                  | 0    | 0   | 0   | 0   | 0   | 0    | 0    | 0   | 0    | 0    | 0    | 0   | 0   | 0    | 0    | 1    | 0    | 43.07  | 2         |
| trimethyl amine                                 | 0    | 1   | 0   | 0   | 0   | 0    | 0    | 0   | 0    | 0    | 0    | 0   | 0   | 0    | 0    | 1    | 0    | 59.11  | 3         |
| tert-butyl amine                                | 0    | 1   | 0   | 0   | 0   | 0    | 0    | 0   | 0    | 0    | 0    | 1   | 0   | 0    | 0    | 1    | 0    | 73.14  | 3         |
| isopropylamine                                  | 0    | 1   | 0   | 0   | 0   | 0    | 0    | 0   | 0    | 0    | 0    | 0   | 0   | 0    | 0    | 1    | 0    | 59.11  | 3         |
| dimethyl alkyl amines                           | 0    | 1   | 0   | 0   | 0   | 0    | 0    | 0   | 0    | 0    | 0    | 0   | 0   | 0    | 0    | 1    | 0    | 59.11  | 3         |
| acrylonitrile                                   | 0    | 1   | 1   | 0   | 0   | 0    | 0    | 0   | 0    | 0    | 0    | 0   | 0   | 0    | 0    | 0    | 0    | 53.06  | 3         |
| Isobutyronitrile                                | 0    | 3   | 0   | 0   | 0   | 0    | 0    | 0   | 0    | 0    | 0    | 1   | 0   | 0    | 0    | 0    | 0    | 69.11  | 3         |
| butyronitrile                                   | 0    | 3   | 0   | 0   | 0   | 0    | 0    | 0   | 0    | 0    | 0    | 1   | 0   | 0    | 0    | 0    | 0    | 69.11  | 3         |
| N,N-Dimethylacetoacetamide                      | 0    | 2   | 0   | 0   | 0   | 0    | 0    | 0   | 0    | 0    | 0    | 2   | 0   | 0    | 0    | 1    | 0    | 129.16 | 4         |
| dimethylacetamide                               | 0    | 0   | 0   | 0   | 0   | 0    | 0    | 0   | 0    | 0    | 0    | 0   | 0   | 0    | 0    | 2    | 0    | 87.12  | 4         |

**Table 1. Matrix of Assignments from Real Compounds to Carbon Bond 05 (CB05) Model Species**

| name                                          | NASN | PAR | OLE | TOL | XYL | FORM | ALD2 | ETH | ISOP | MEOH | ETOH | NR | CH4 | ETHA | IOLE | ALDX | TERP | MW     | # carbons |
|-----------------------------------------------|------|-----|-----|-----|-----|------|------|-----|------|------|------|----|-----|------|------|------|------|--------|-----------|
| N-(2-Hydroxyethyl)ethylenediamine             | 0    | 2   | 0   | 0   | 0   | 0    | 0    | 0   | 0    | 0    | 0    | 0  | 0   | 0    | 0    | 1    | 0    | 104.15 | 4         |
| diethanolamine                                | 0    | 4   | 0   | 0   | 0   | 0    | 0    | 0   | 0    | 0    | 0    | 0  | 0   | 0    | 0    | 0    | 0    | 105.14 | 4         |
| n,n-dimethylethanolamine                      | 0    | 4   | 0   | 0   | 0   | 0    | 0    | 0   | 0    | 0    | 0    | 0  | 0   | 0    | 0    | 0    | 0    | 89.14  | 4         |
| diethylenetriamine                            | 0    | 2   | 0   | 0   | 0   | 0    | 0    | 0   | 0    | 0    | 0    | 0  | 0   | 0    | 0    | 1    | 0    | 103.17 | 4         |
| diethylamine                                  | 0    | 2   | 0   | 0   | 0   | 0    | 0    | 0   | 0    | 0    | 0    | 0  | 0   | 0    | 0    | 1    | 0    | 73.14  | 4         |
| n-Butylamine                                  | 0    | 2   | 0   | 0   | 0   | 0    | 0    | 0   | 0    | 0    | 0    | 0  | 0   | 0    | 0    | 1    | 0    | 73.14  | 4         |
| 2-methyl-3-butenenitrile                      | 0    | 2   | 1   | 0   | 0   | 0    | 0    | 0   | 0    | 0    | 0    | 1  | 0   | 0    | 0    | 0    | 0    | 81.12  | 4         |
| methyl glutaronitrile                         | 0    | 4   | 0   | 0   | 0   | 0    | 0    | 0   | 0    | 0    | 0    | 2  | 0   | 0    | 0    | 0    | 0    | 108.14 | 4         |
| morpholine (tetrahydro-1,4-oxazin)            | 0    | 4   | 0   | 0   | 0   | 0    | 0    | 0   | 0    | 0    | 0    | 0  | 0   | 0    | 0    | 0    | 0    | 87.12  | 4         |
| caprolactam                                   | 0    | 5   | 0   | 0   | 0   | 0    | 0    | 0   | 0    | 0    | 0    | 1  | 0   | 0    | 0    | 0    | 0    | 113.16 | 5         |
| 1,4-Diazabicyclo[2.2.2]octane                 | 0    | 4   | 0   | 0   | 0   | 0    | 0    | 0   | 0    | 0    | 0    | 0  | 0   | 0    | 0    | 1    | 0    | 112.18 | 6         |
| hexamethylenediamine                          | 0    | 4   | 0   | 0   | 0   | 0    | 0    | 0   | 0    | 0    | 0    | 0  | 0   | 0    | 0    | 1    | 0    | 116.21 | 6         |
| cyclohexamine                                 | 0    | 4   | 0   | 0   | 0   | 0    | 0    | 0   | 0    | 0    | 0    | 0  | 0   | 0    | 0    | 1    | 0    | 99.18  | 6         |
| hexamethyleneimine                            | 0    | 4   | 0   | 0   | 0   | 0    | 0    | 0   | 0    | 0    | 0    | 0  | 0   | 0    | 0    | 1    | 0    | 99.18  | 6         |
| Diisopropanolamine                            | 0    | 4   | 0   | 0   | 0   | 0    | 0    | 0   | 0    | 0    | 0    | 0  | 0   | 0    | 0    | 1    | 0    | 133.19 | 6         |
| triethanolamine                               | 0    | 4   | 0   | 0   | 0   | 0    | 0    | 0   | 0    | 0    | 0    | 0  | 0   | 0    | 0    | 1    | 0    | 149.19 | 6         |
| triethylene tetramine                         | 0    | 4   | 0   | 0   | 0   | 0    | 0    | 0   | 0    | 0    | 0    | 0  | 0   | 0    | 0    | 1    | 0    | 146.24 | 6         |
| triethylamine                                 | 0    | 2   | 1   | 0   | 0   | 0    | 0    | 0   | 0    | 0    | 0    | 0  | 0   | 0    | 0    | 1    | 0    | 101.19 | 6         |
| n-Hexylamine                                  | 0    | 4   | 0   | 0   | 0   | 0    | 0    | 0   | 0    | 0    | 0    | 0  | 0   | 0    | 0    | 1    | 0    | 101.19 | 6         |
| N-aminoethylpiperazine                        | 0    | 4   | 0   | 0   | 0   | 0    | 0    | 0   | 0    | 0    | 0    | 0  | 0   | 0    | 0    | 1    | 0    | 129.21 | 6         |
| n-phenylaniline (diphenylamine)               | 0    | 0   | 0   | 1   | 0   | 0    | 0    | 0   | 0    | 0    | 0    | 5  | 0   | 0    | 0    | 0    | 0    | 169.23 | 7         |
| 4-methylaniline                               | 0    | 0   | 0   | 1   | 0   | 0    | 0    | 0   | 0    | 0    | 0    | 0  | 0   | 0    | 0    | 0    | 0    | 107.16 | 7         |
| toluene isocyanate                            | 0    | 0   | 0   | 1   | 0   | 0    | 0    | 0   | 0    | 0    | 0    | 1  | 0   | 0    | 0    | 0    | 0    | 133.15 | 7         |
| 2,4-toluene diisocyanate {tdi}                | 0    | 0   | 0   | 1   | 0   | 0    | 0    | 0   | 0    | 0    | 0    | 2  | 0   | 0    | 0    | 0    | 0    | 174.16 | 7         |
| 2,4-Dinitrotoluene                            | 0    | 0   | 0   | 1   | 0   | 0    | 0    | 0   | 0    | 0    | 0    | 0  | 0   | 0    | 0    | 0    | 0    | 182.14 | 7         |
| benzothiazole                                 | 0    | 0   | 0   | 1   | 0   | 0    | 0    | 0   | 0    | 0    | 0    | 0  | 0   | 0    | 0    | 0    | 0    | 135.19 | 7         |
| Tetraethylenepentamine                        | 0    | 6   | 0   | 0   | 0   | 0    | 0    | 0   | 0    | 0    | 0    | 0  | 0   | 0    | 0    | 1    | 0    | 189.31 | 8         |
| 4,4-methylene dianiline                       | 0    | 1   | 0   | 1   | 0   | 0    | 0    | 0   | 0    | 0    | 0    | 5  | 0   | 0    | 0    | 0    | 0    | 198.27 | 8         |
| dimethylnaphthyridine                         | 0    | 3   | 0   | 1   | 0   | 0    | 0    | 0   | 0    | 0    | 0    | 0  | 0   | 0    | 0    | 0    | 0    | 158.2  | 10        |
| <b>SULFUR containing compounds - examples</b> |      |     |     |     |     |      |      |     |      |      |      |    |     |      |      |      |      |        |           |
| carbonyl sulfide                              | 0    | 0   | 0   | 0   | 0   | 0    | 0    | 0   | 0    | 0    | 0    | 1  | 0   | 0    | 0    | 0    | 0    | 60.07  | 0         |
| carbon disulfide                              | 0    | 1   | 0   | 0   | 0   | 0    | 0    | 0   | 0    | 0    | 0    | 0  | 0   | 0    | 0    | 0    | 0    | 76.14  | 1         |
| methyl mercaptan                              | 0    | 1   | 0   | 0   | 0   | 0    | 0    | 0   | 0    | 0    | 0    | 0  | 0   | 0    | 0    | 0    | 0    | 48.11  | 1         |
| dimethyl sulfide                              | 0    | 2   | 0   | 0   | 0   | 0    | 0    | 0   | 0    | 0    | 0    | 0  | 0   | 0    | 0    | 0    | 0    | 62.13  | 2         |
| dimethyl disulfide                            | 0    | 2   | 0   | 0   | 0   | 0    | 0    | 0   | 0    | 0    | 0    | 0  | 0   | 0    | 0    | 0    | 0    | 94.2   | 2         |
| ethyl mercaptan                               | 0    | 2   | 0   | 0   | 0   | 0    | 0    | 0   | 0    | 0    | 0    | 0  | 0   | 0    | 0    | 0    | 0    | 62.13  | 2         |
| Diethyl Sulfate                               | 0    | 4   | 0   | 0   | 0   | 0    | 0    | 0   | 0    | 0    | 0    | 0  | 0   | 0    | 0    | 0    | 0    | 154.19 | 4         |
| Thiophene                                     | 0    | 0   | 0   | 0   | 0   | 0    | 0    | 0   | 0    | 0    | 0    | 0  | 0   | 0    | 1    | 0    | 0    | 84.14  | 4         |

## **Appendix B**

**Chamber Simulations for the University of North Carolina (UNC)  
Chamber with CB05 Organized by Chemical Compound Type**

## **Chamber Background**

Au 07 97  
OC 10 96

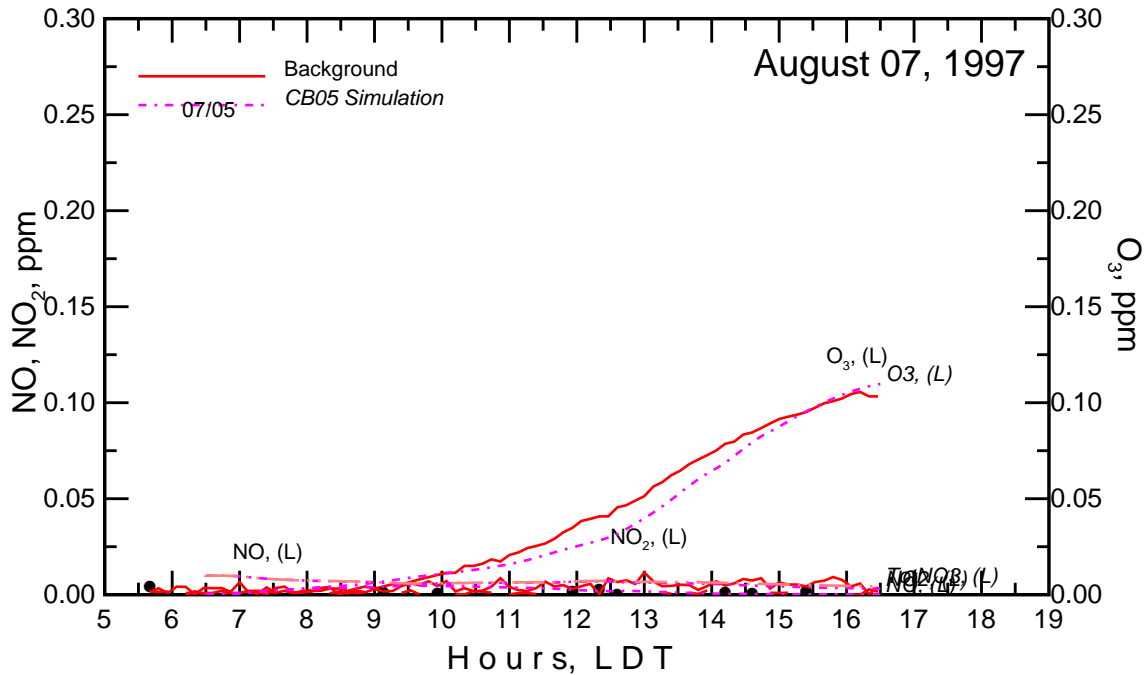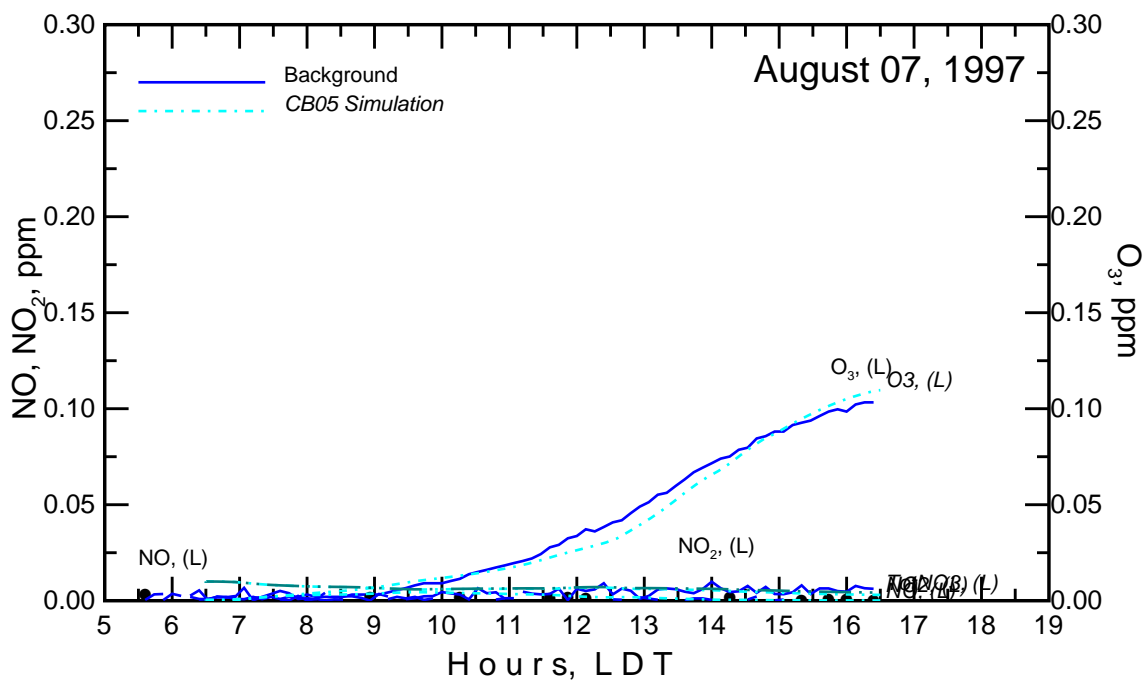

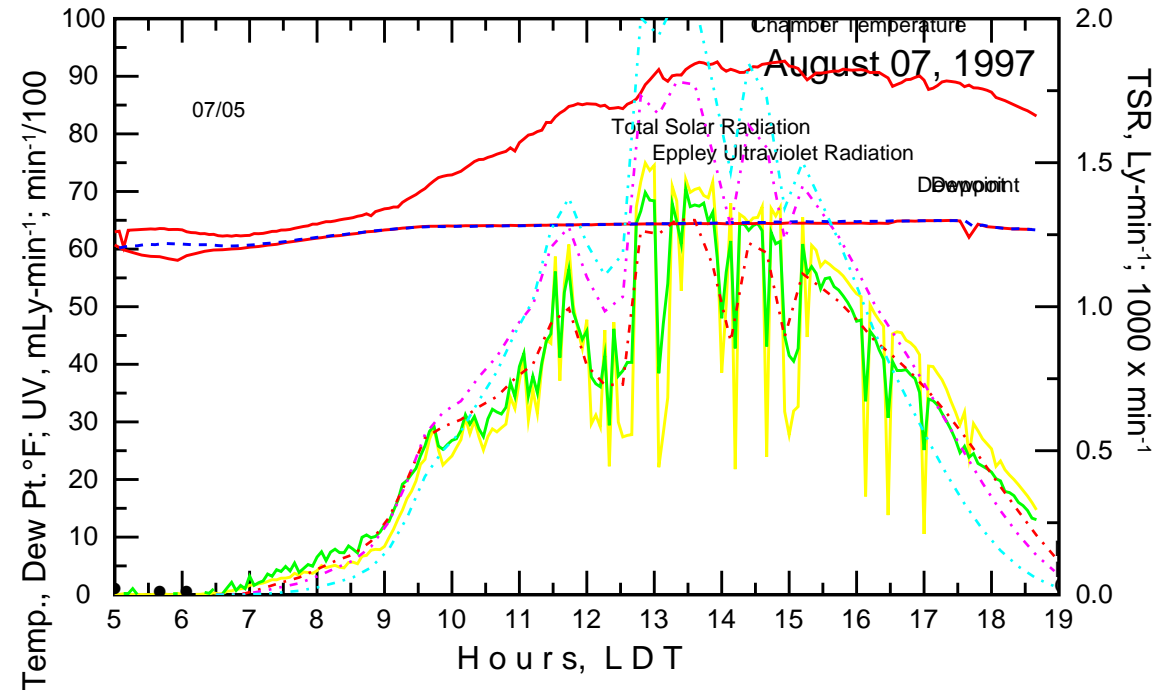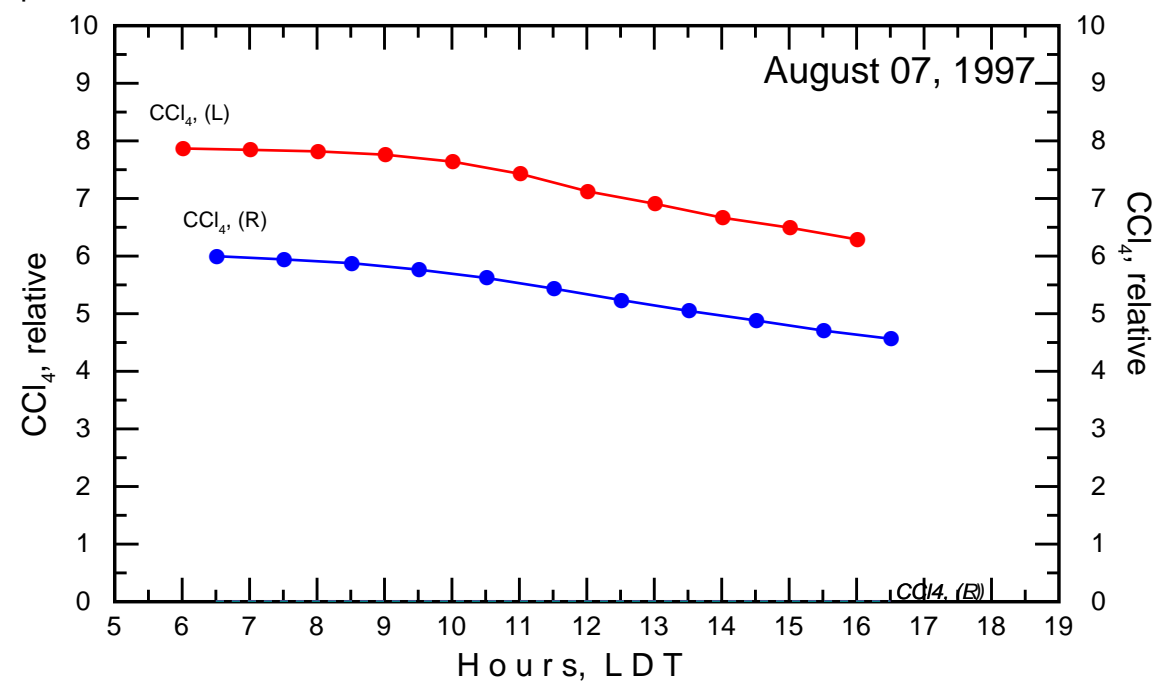

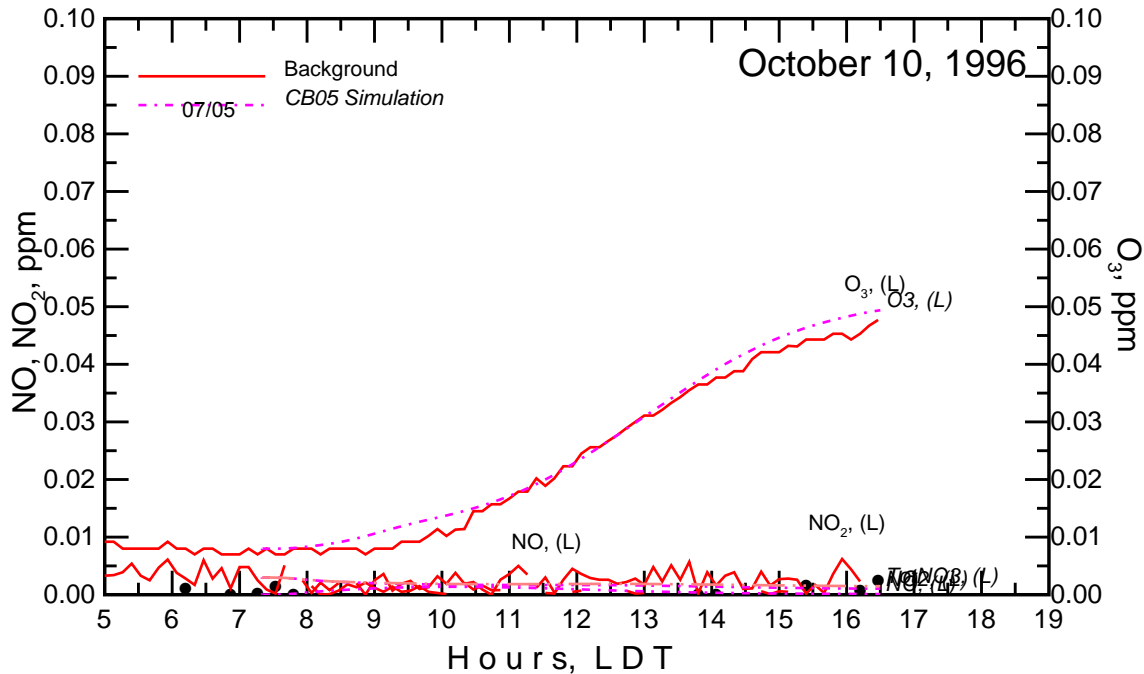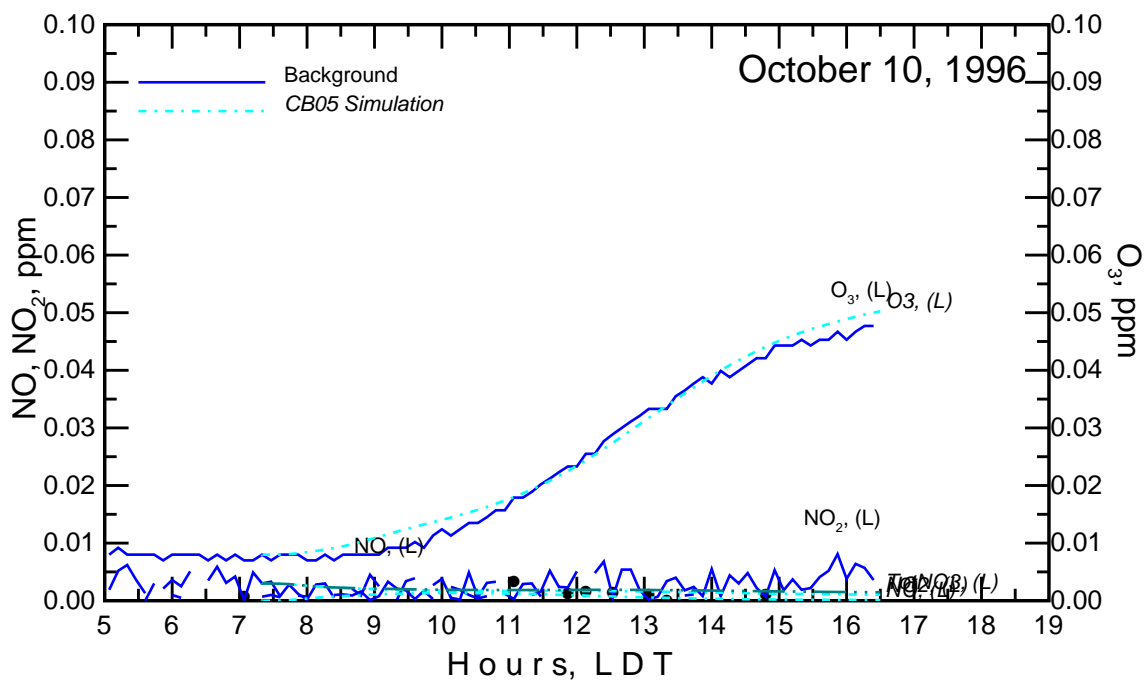

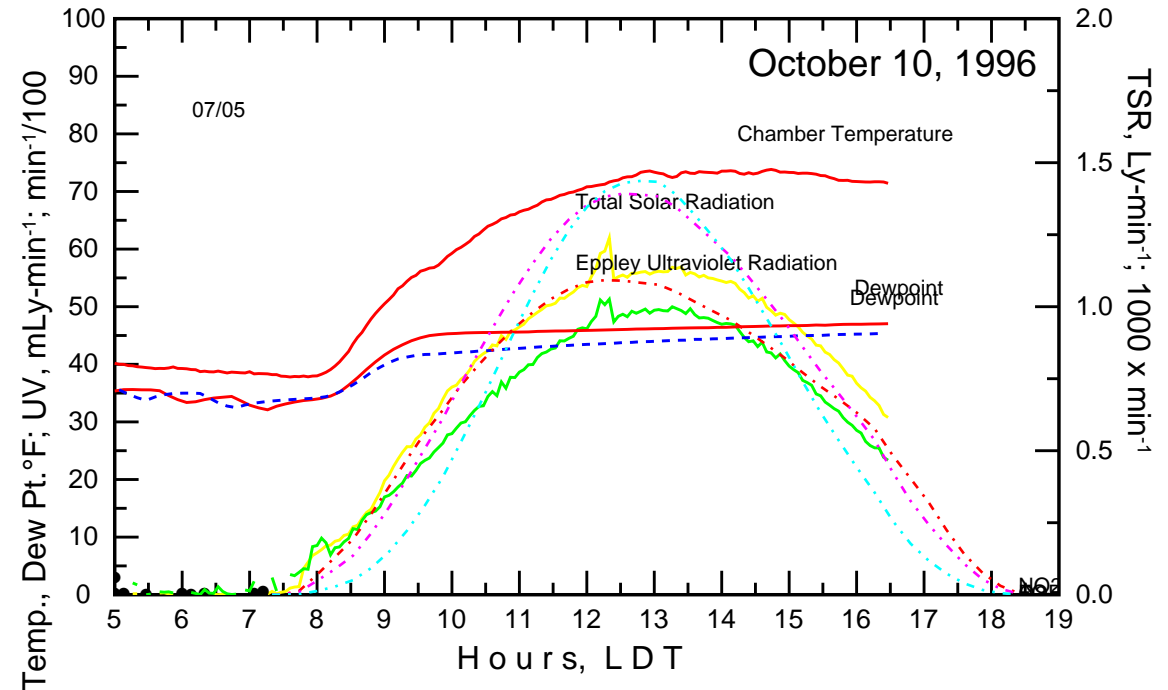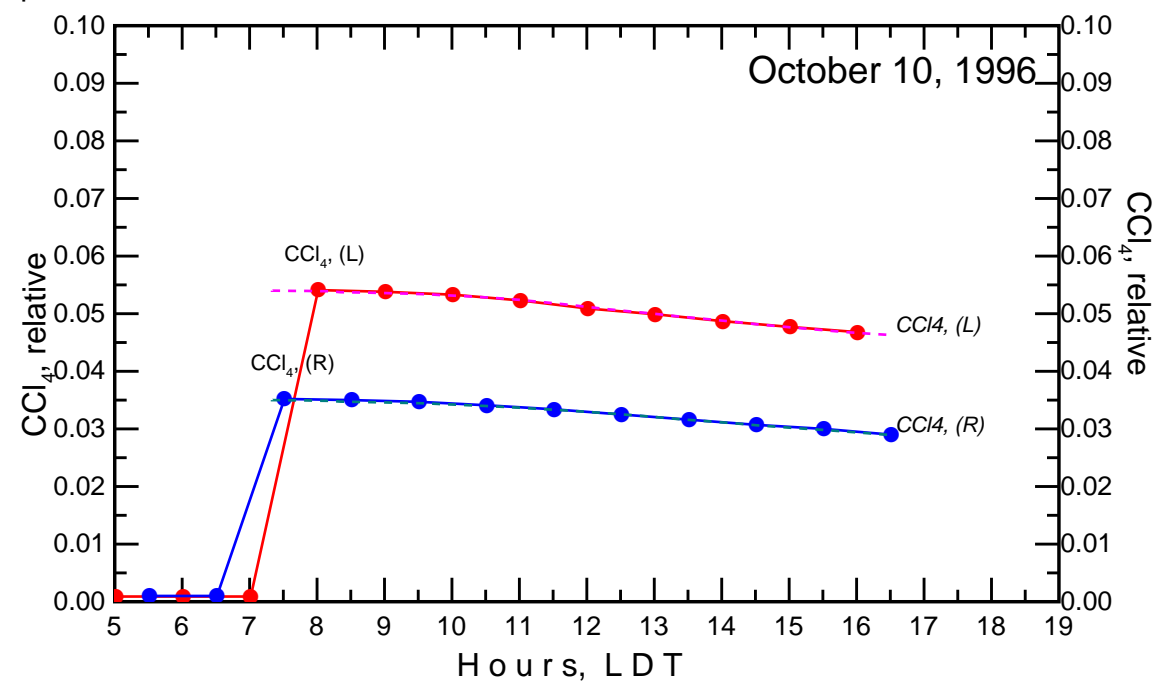

## **Carbon Monoxide (CO)**

JL 07 01  
JL 22 01  
AU 30 93  
ST 20 00  
OC 03 95

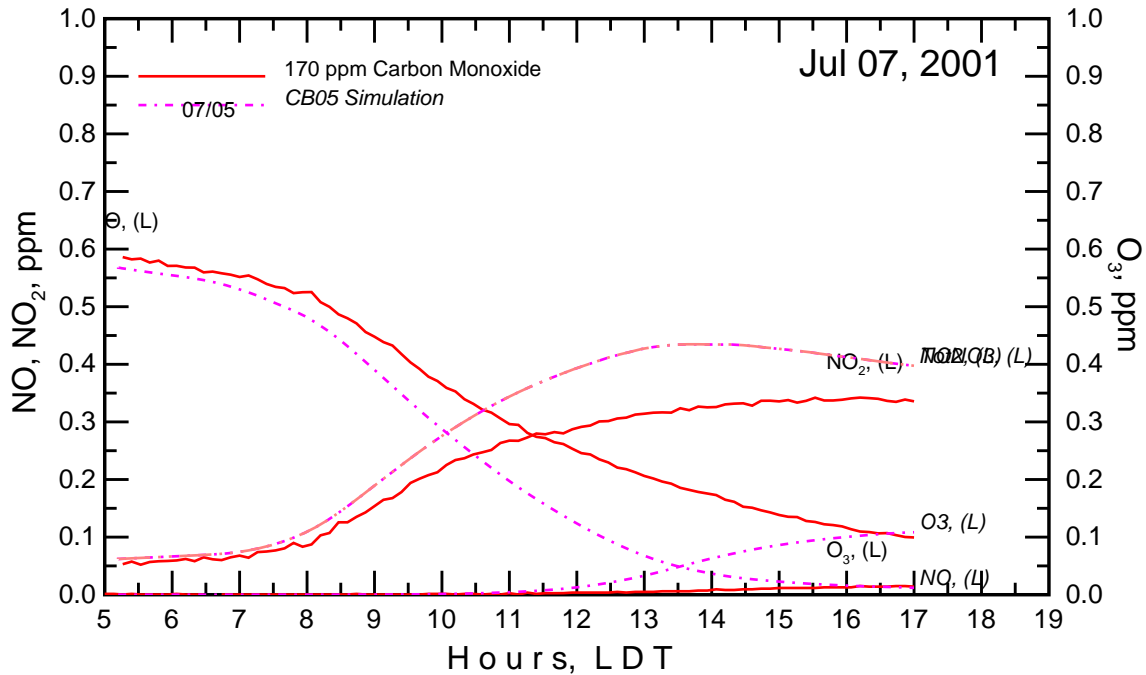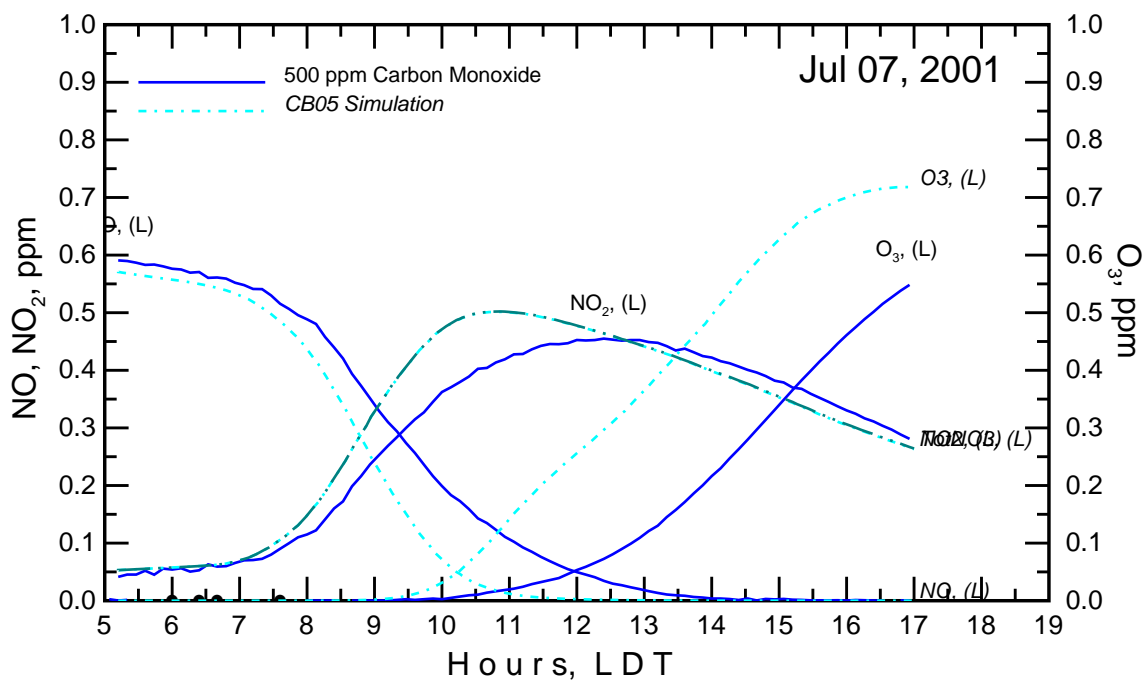

Delta CO (filtered); NOx Matched

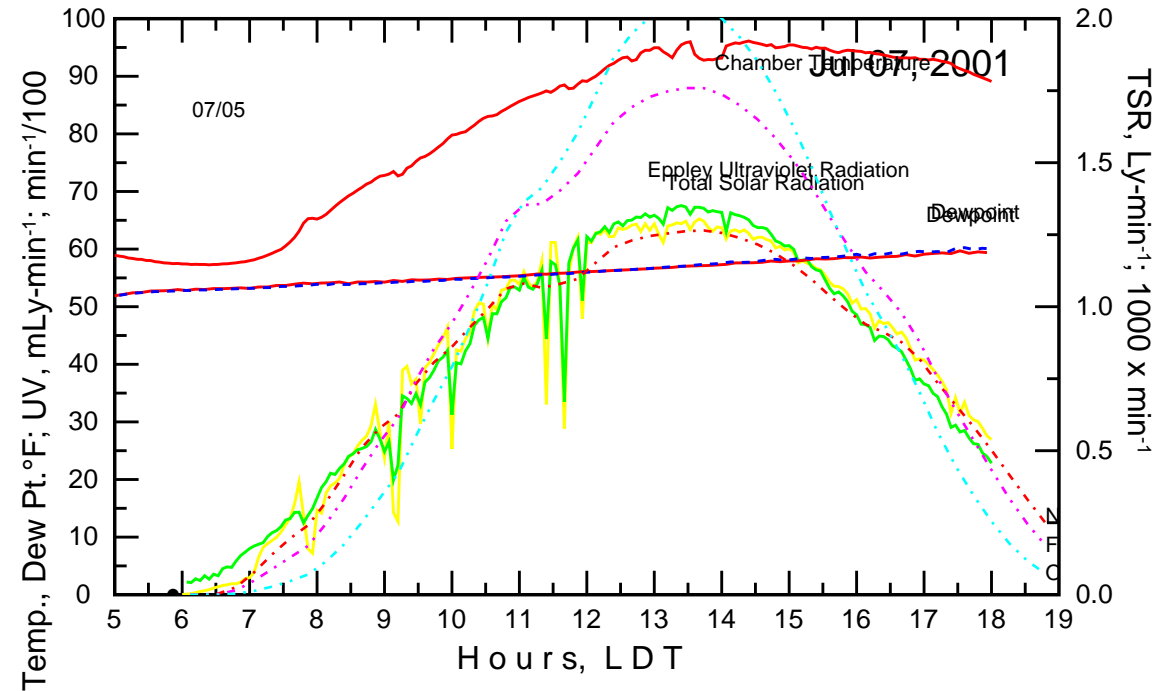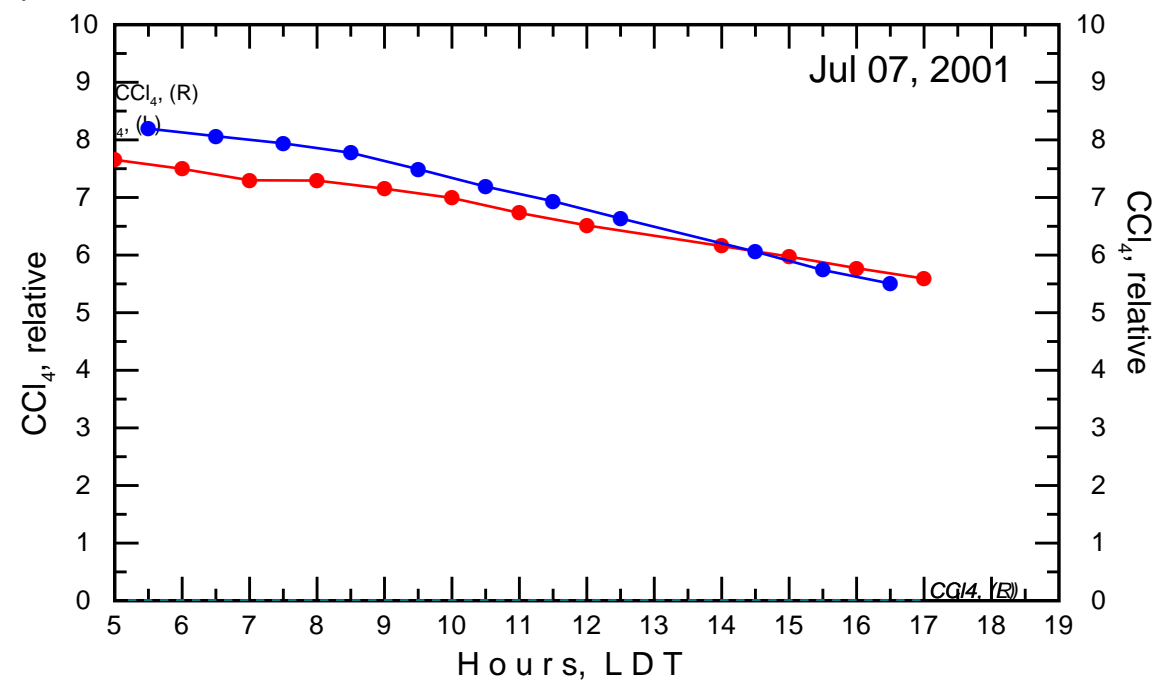

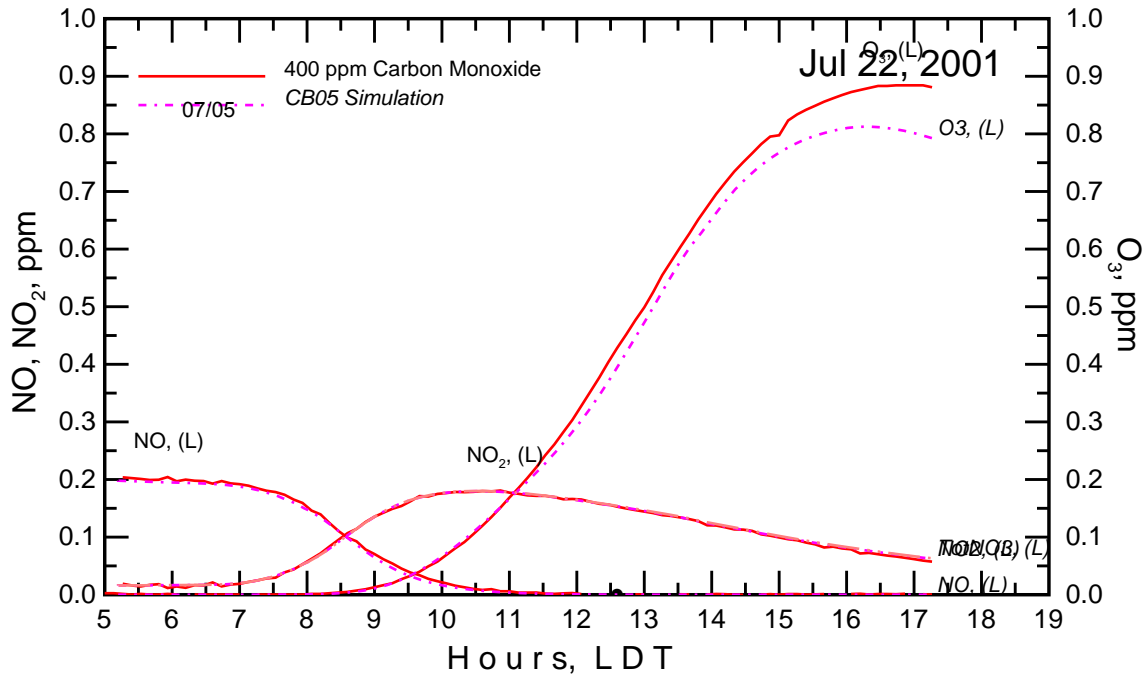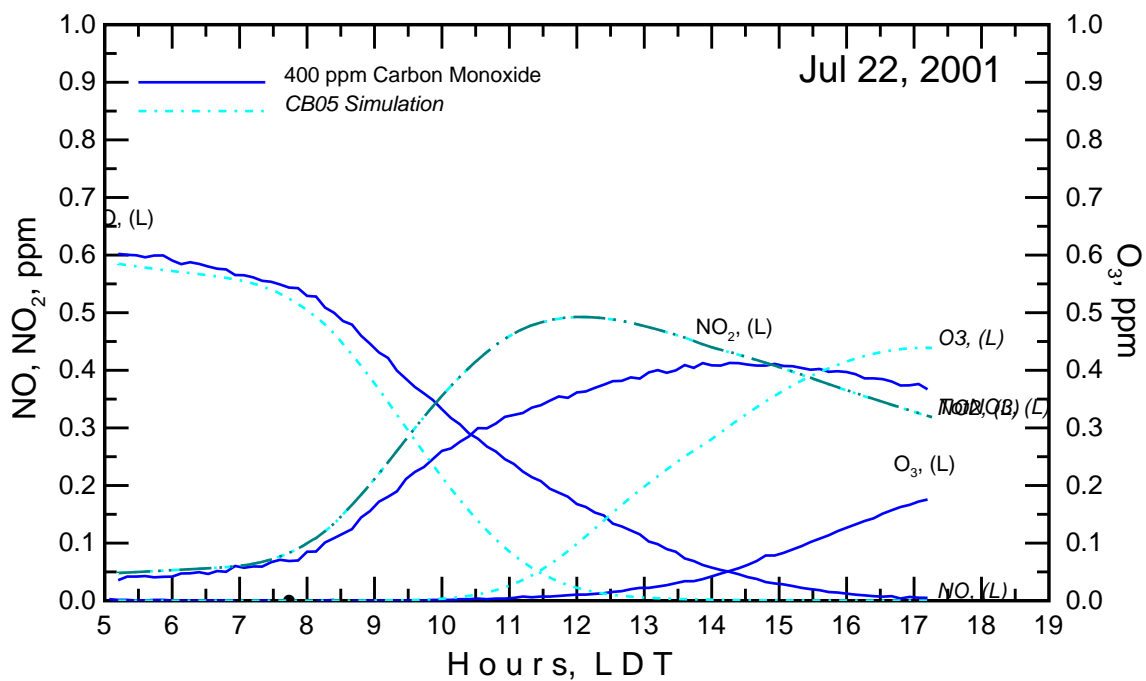

Matched Carbon Monoxide; Delta NO<sub>x</sub>

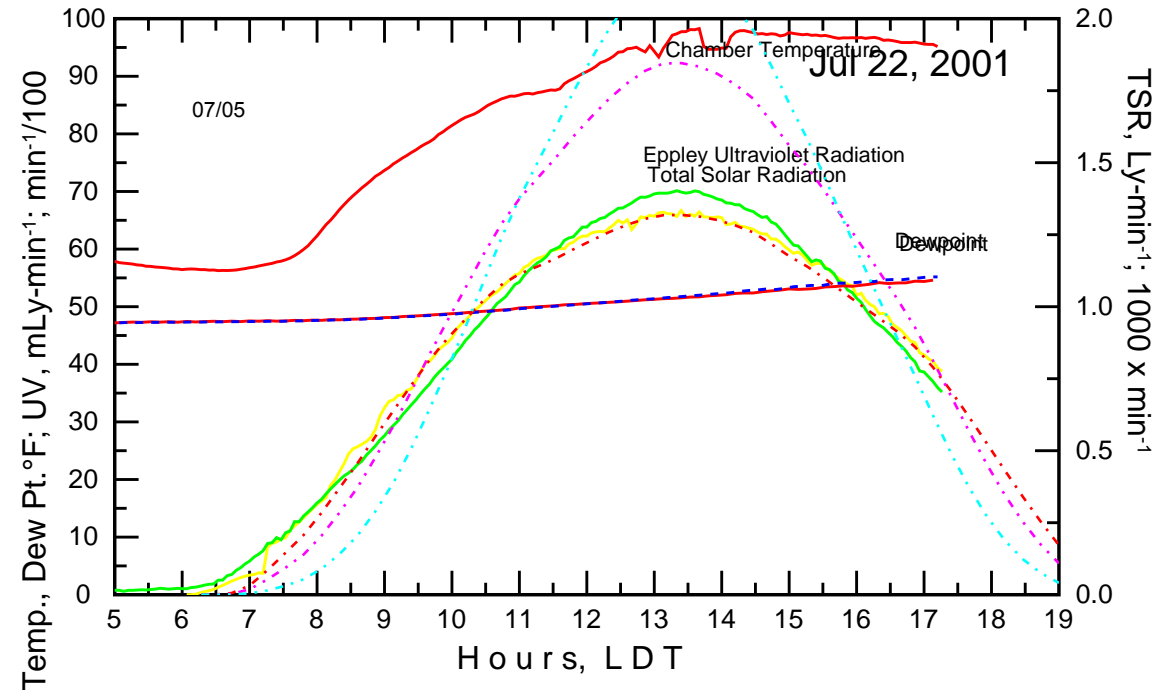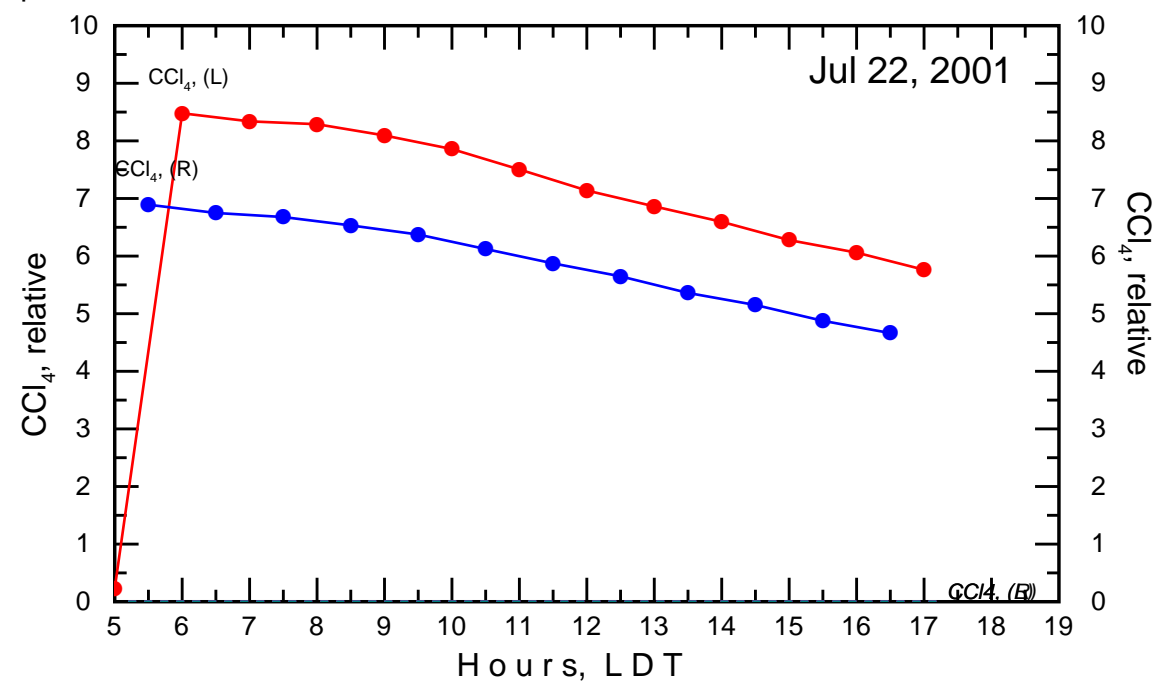

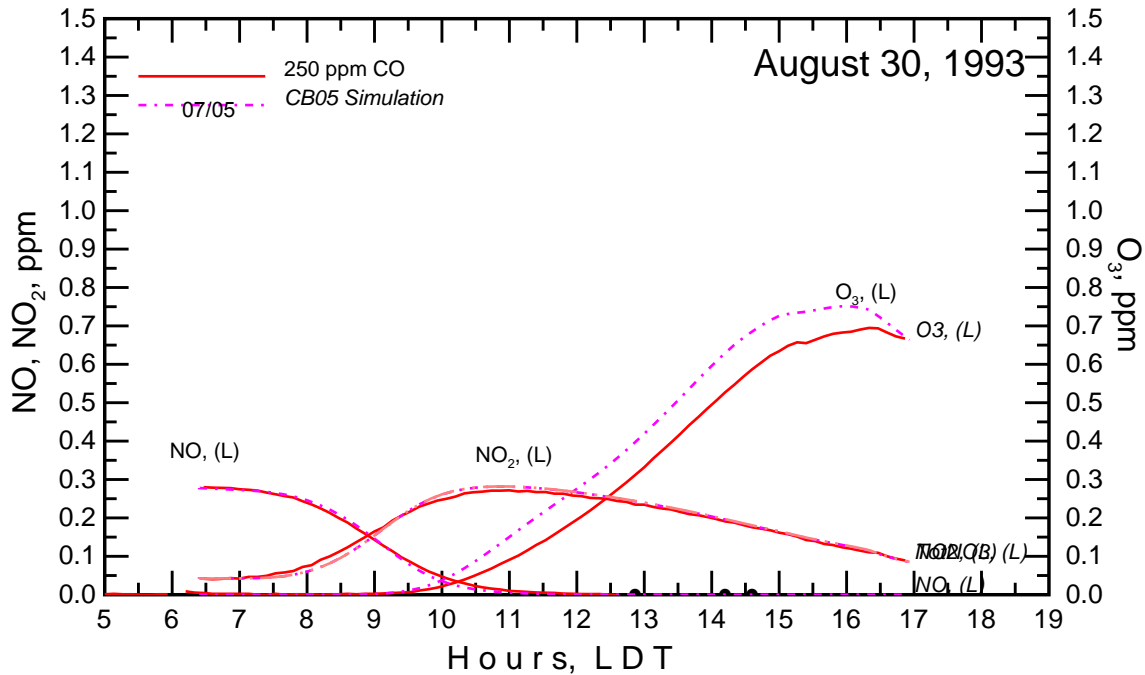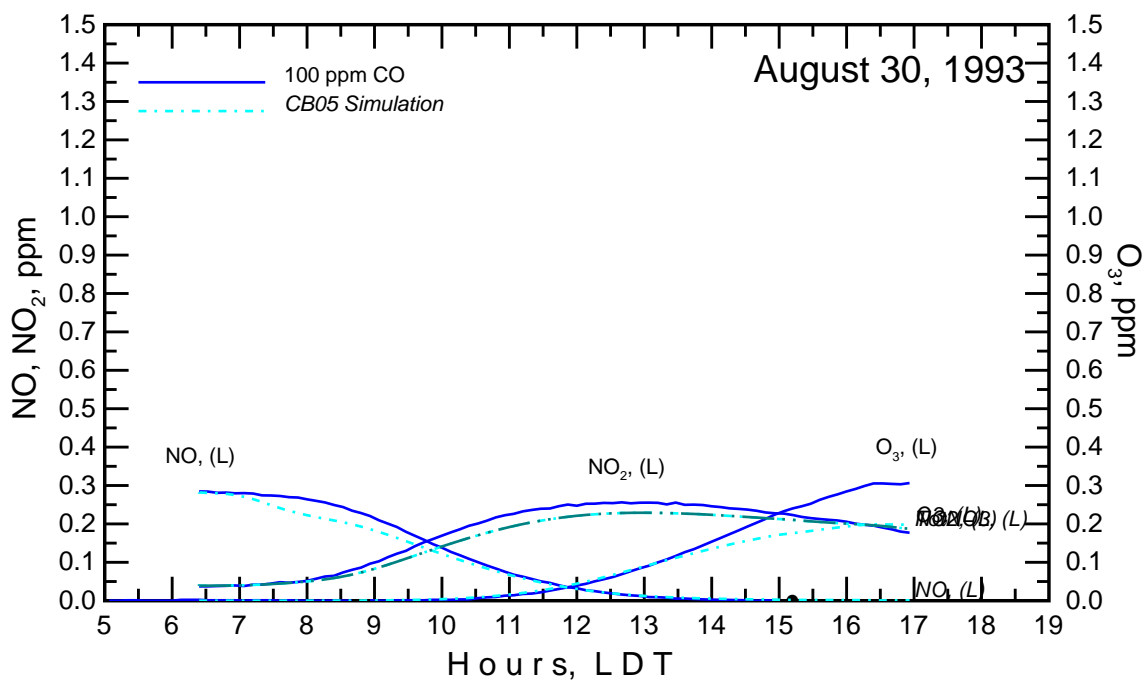

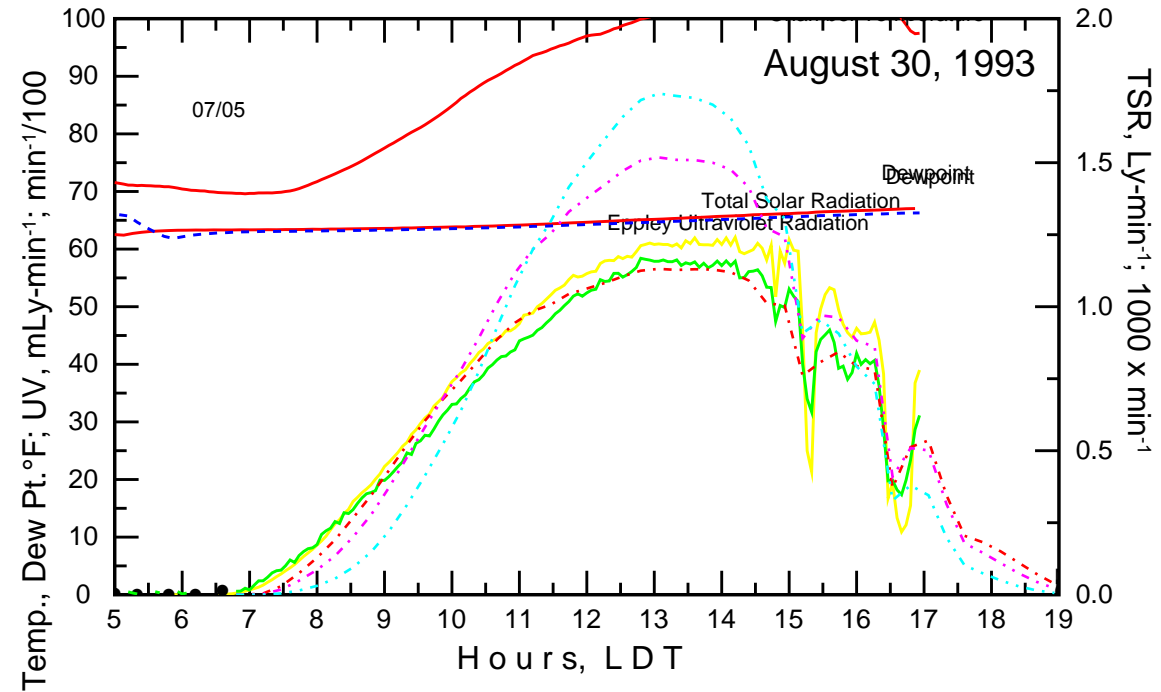

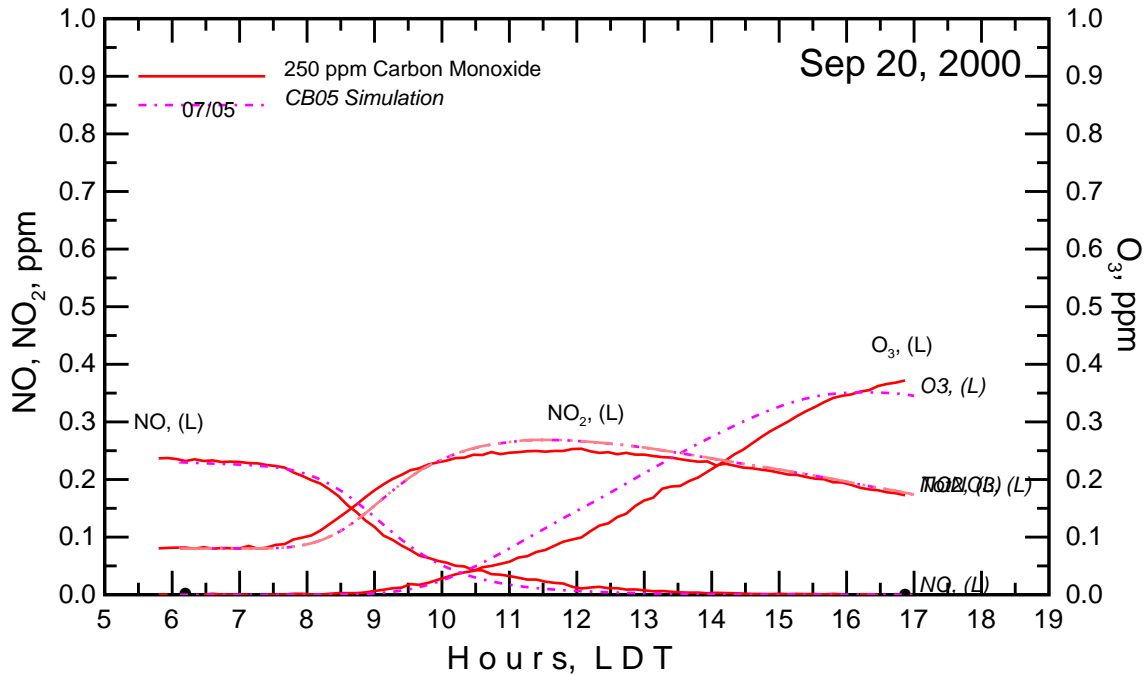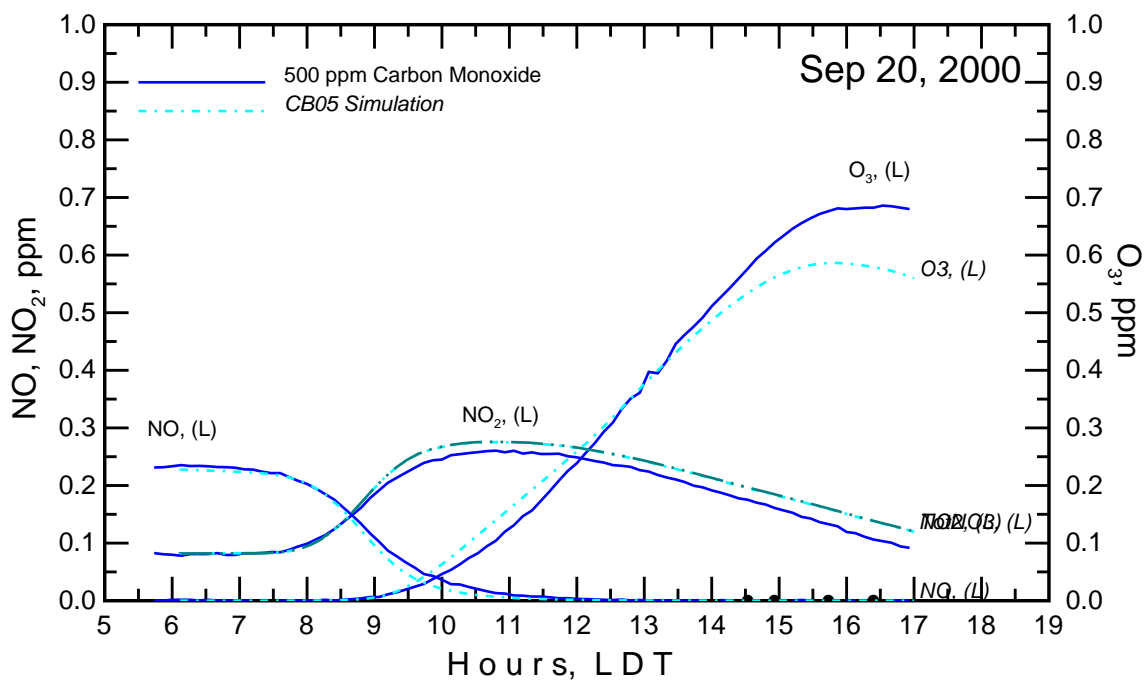

500 vs 250 ppm CO; matched 0.33 NO<sub>x</sub>

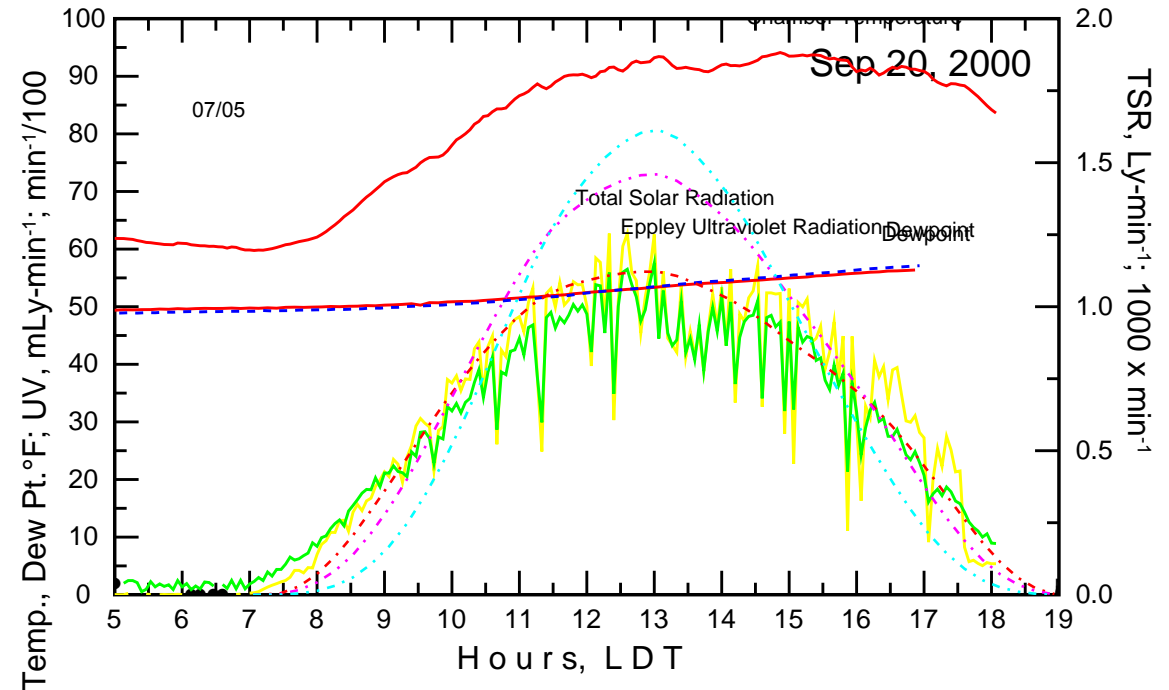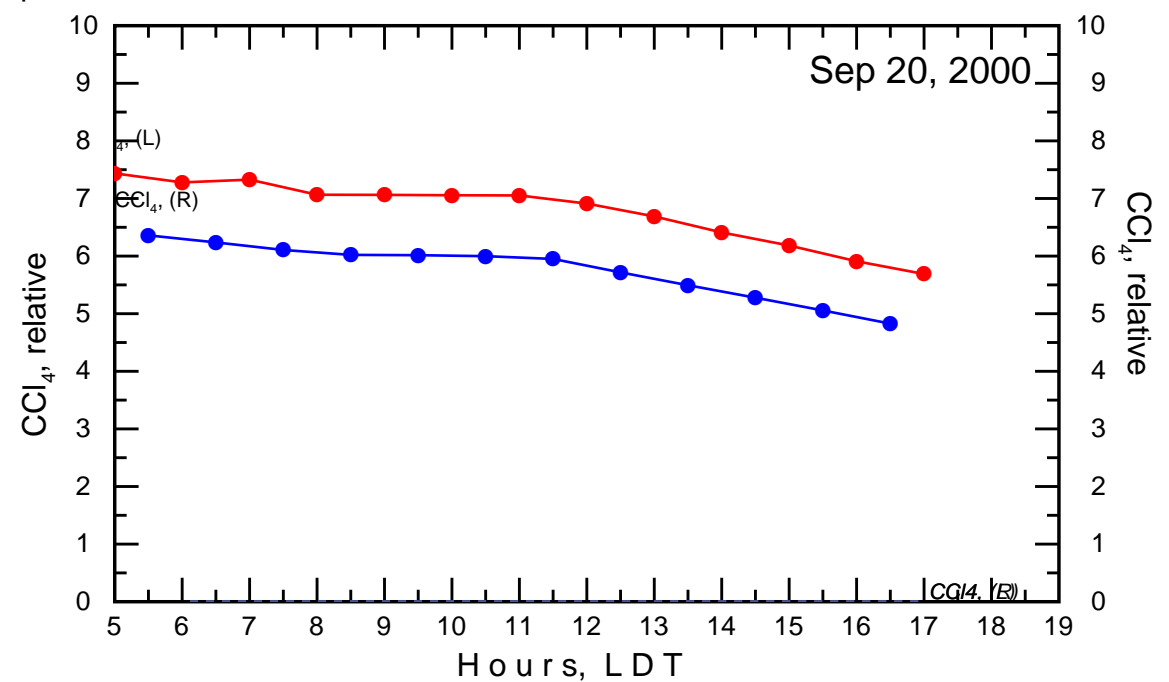

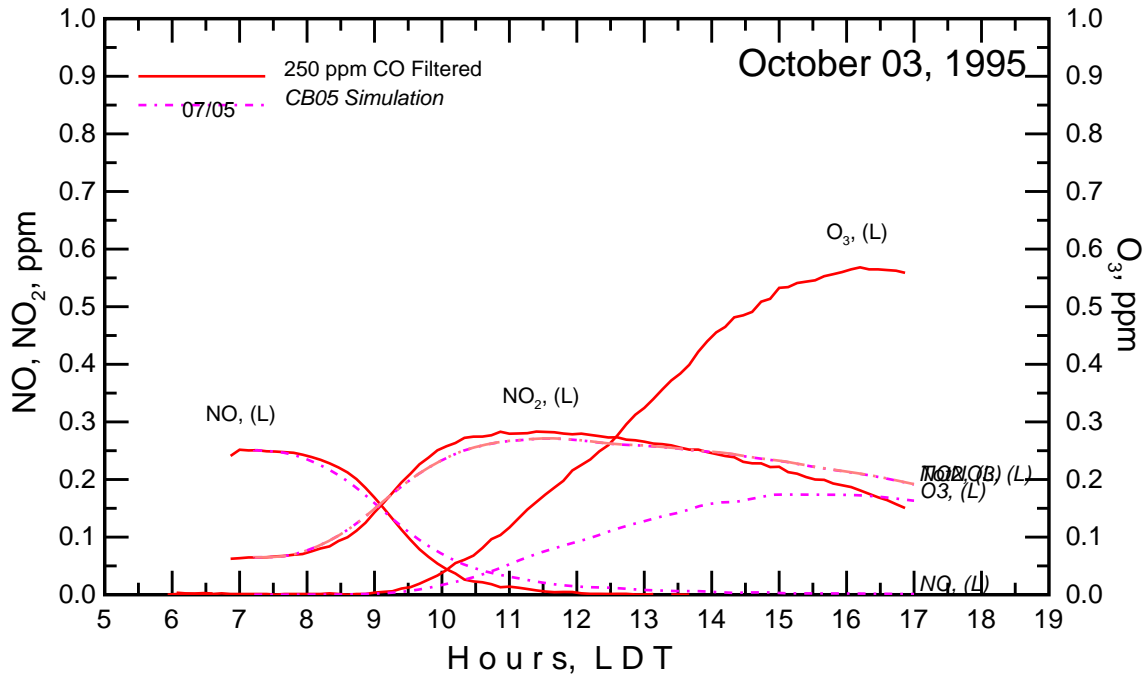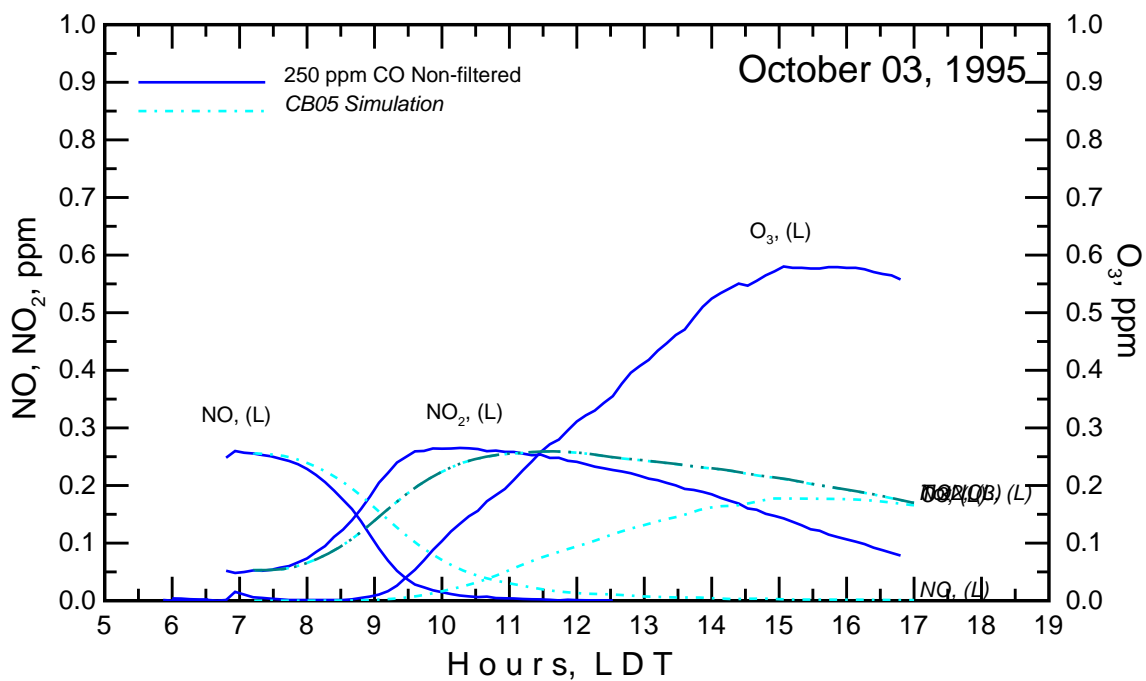

Matched CO and NO<sub>x</sub>; BLUE CO filtered with 13x Molesieve<sup>15</sup>

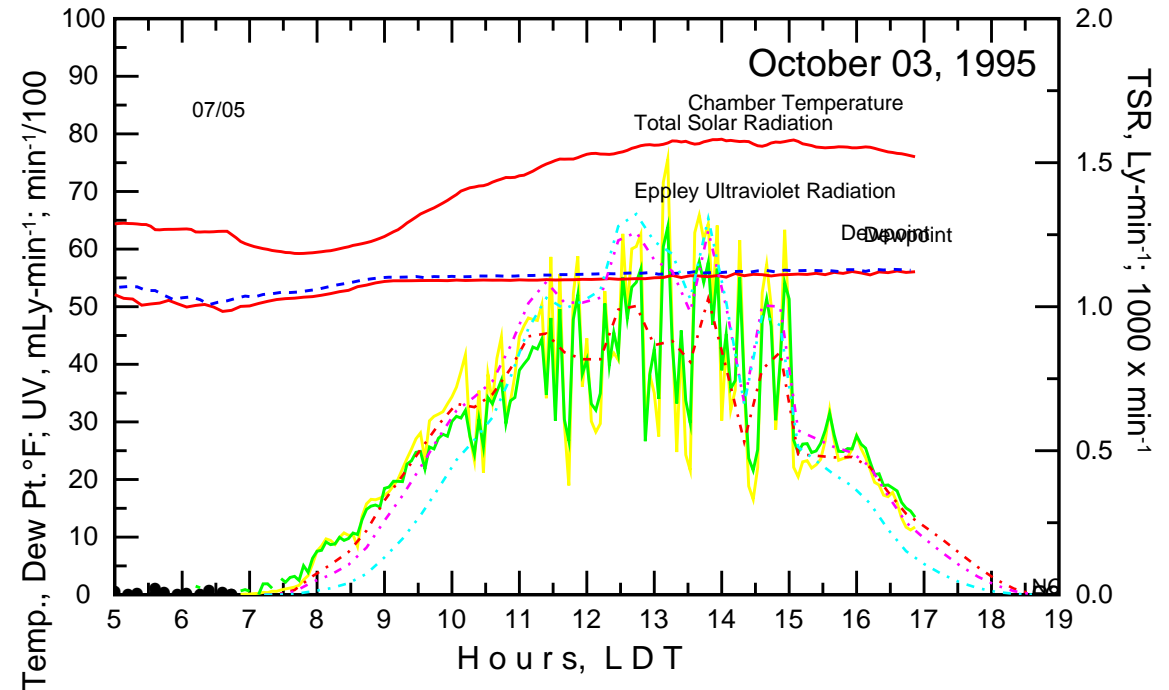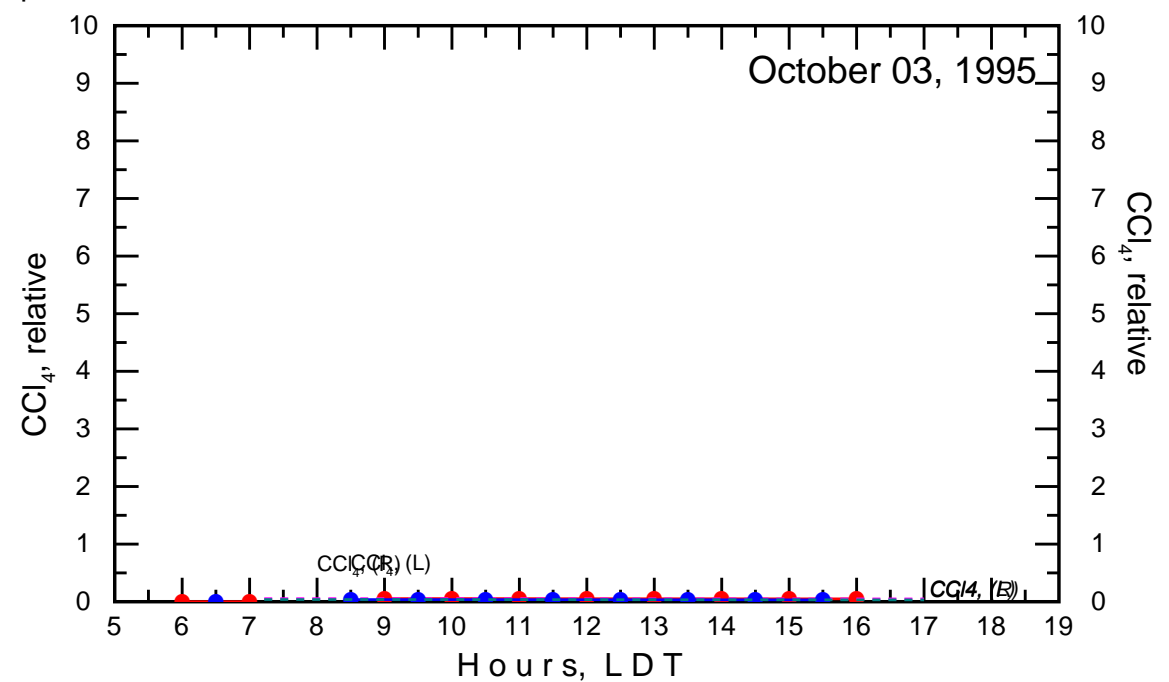



500 vs 250 ppm CO; matched 0.33 NO<sub>x</sub>



**Formaldehyde (FORM)**

JL 08 86  
JL 15 88  
ST 23 97  
ST 30 97

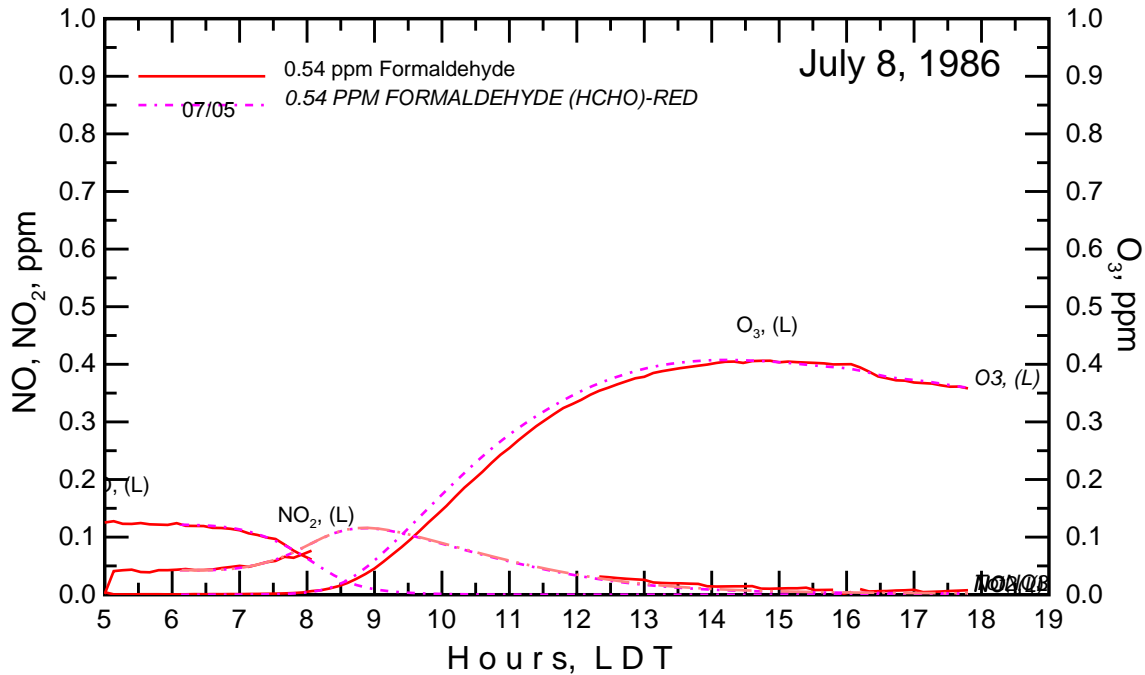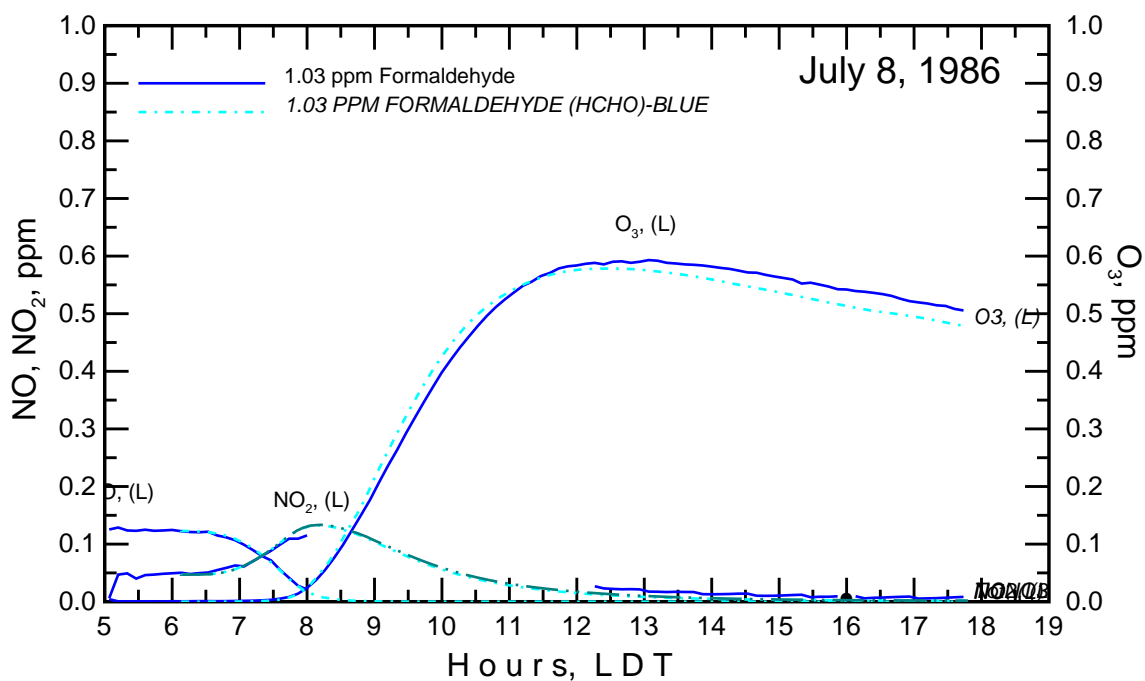

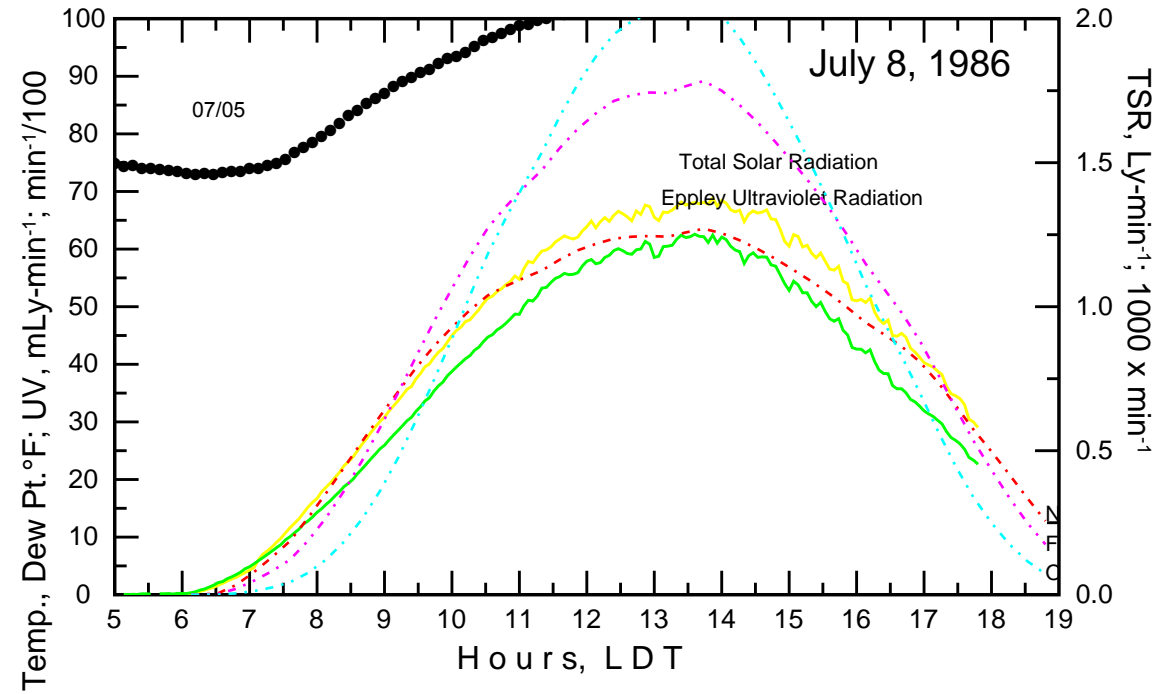

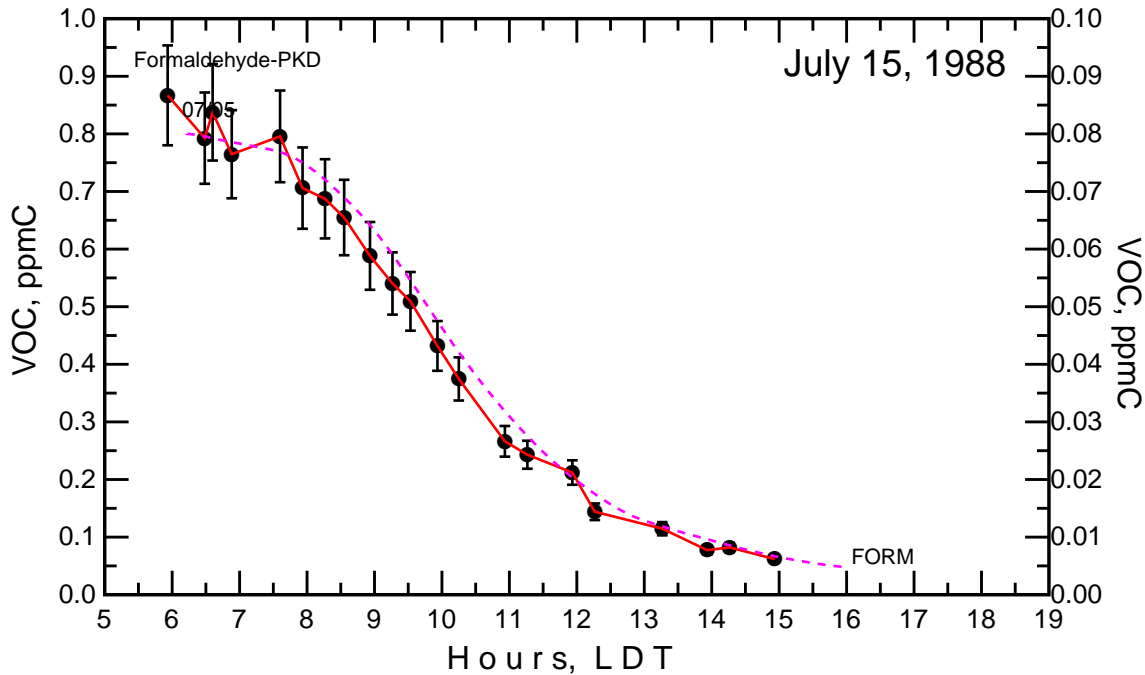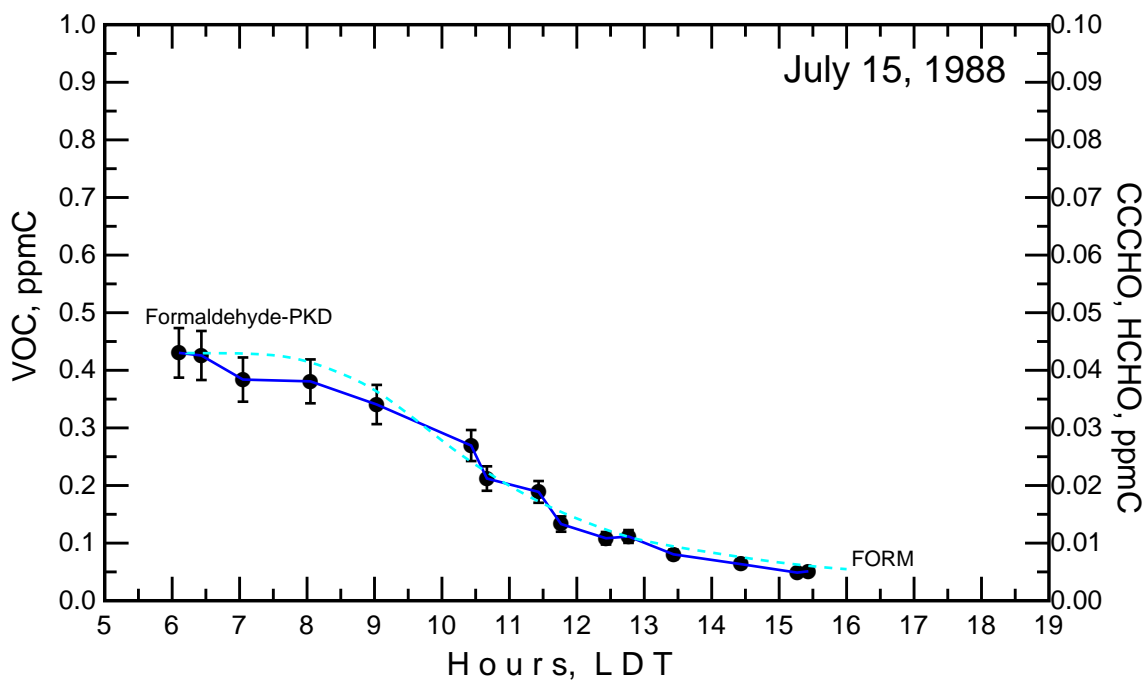

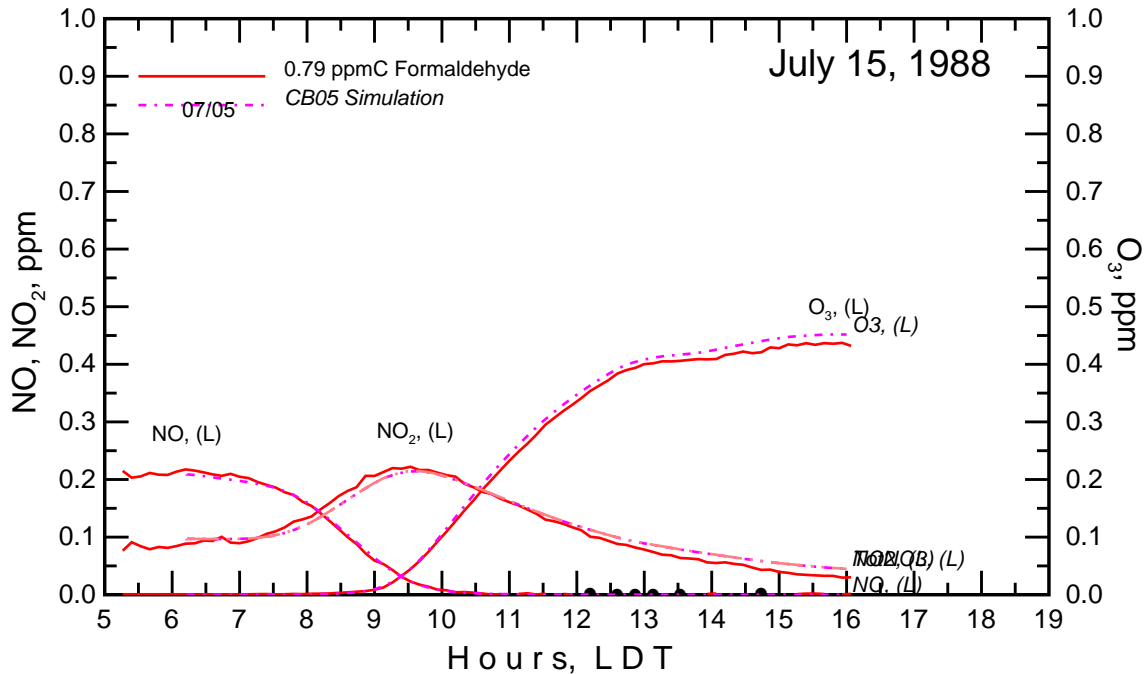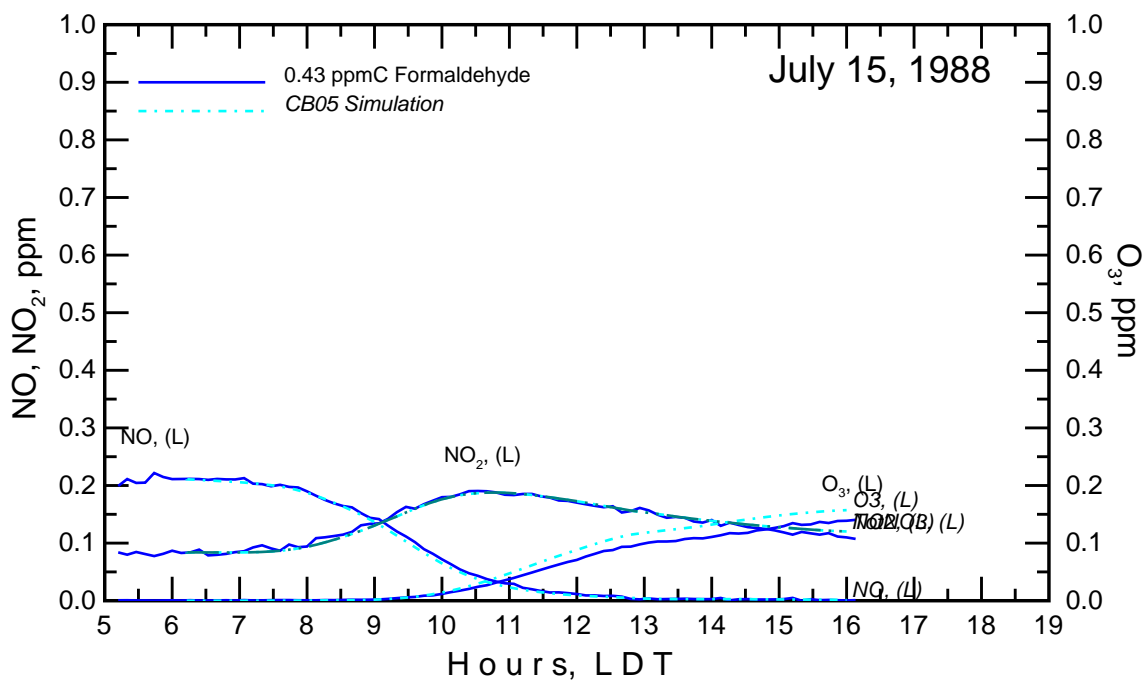

Delta HCHO at 0.3 ppm NO<sub>x</sub>

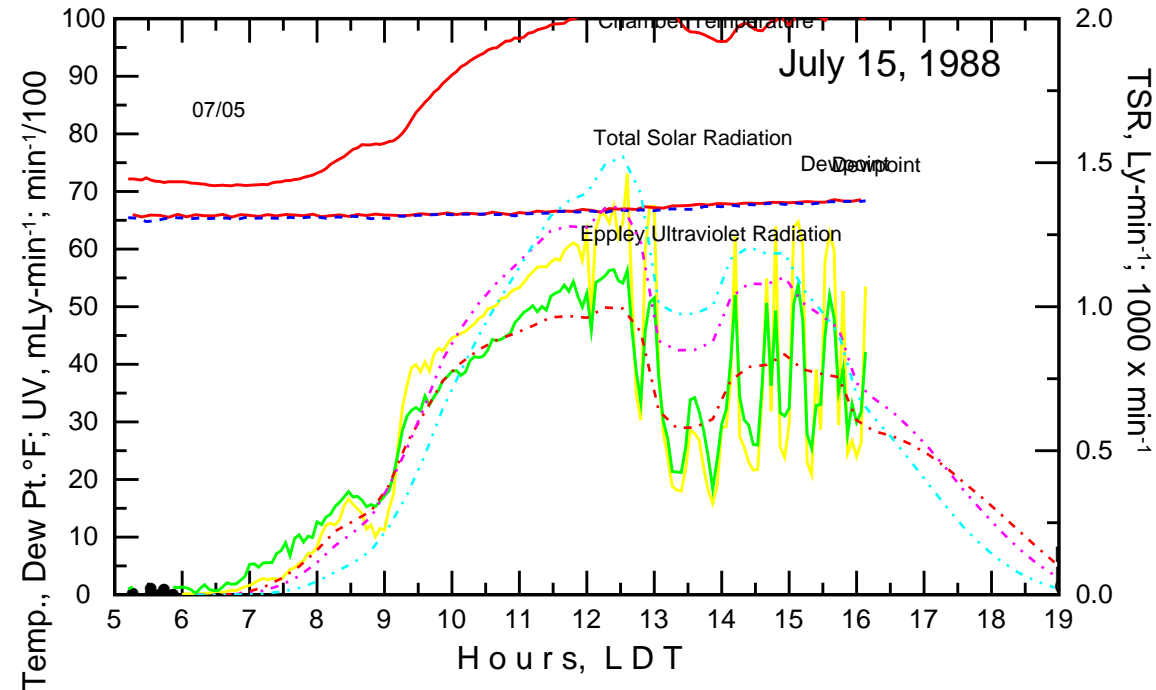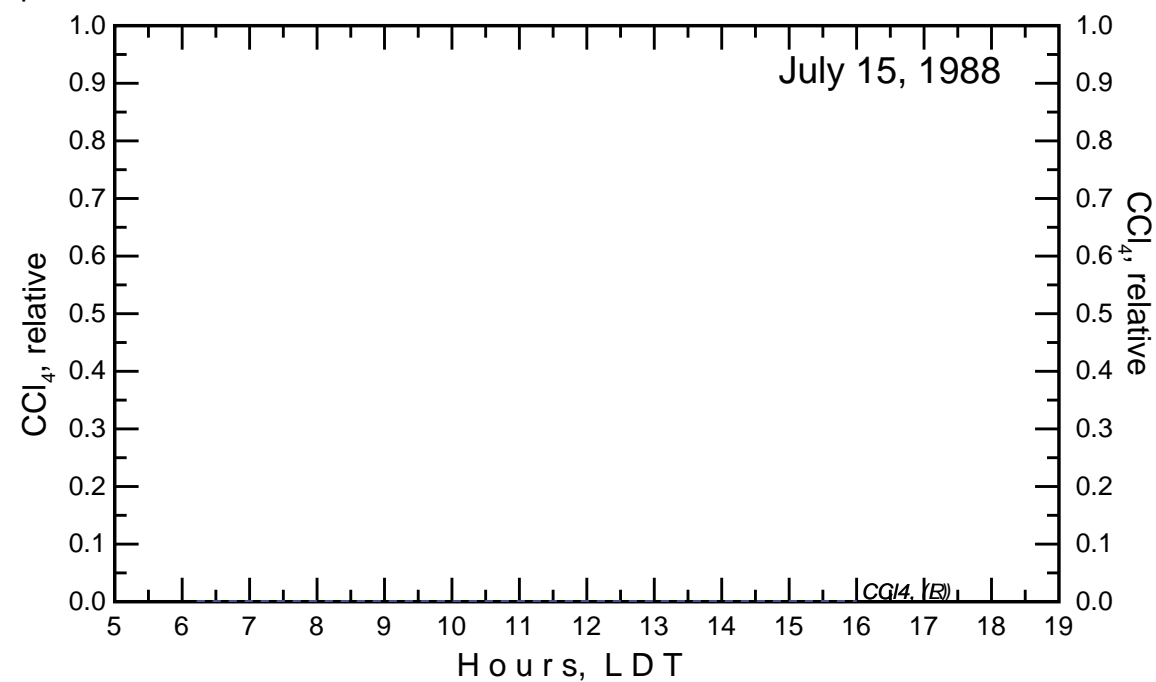

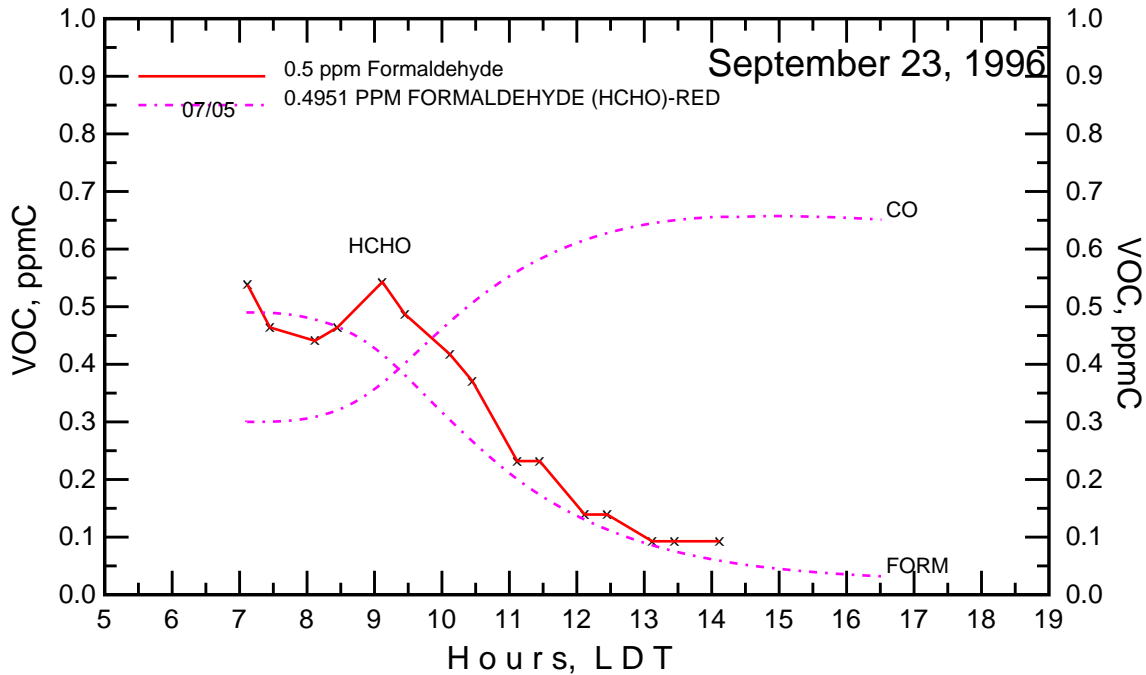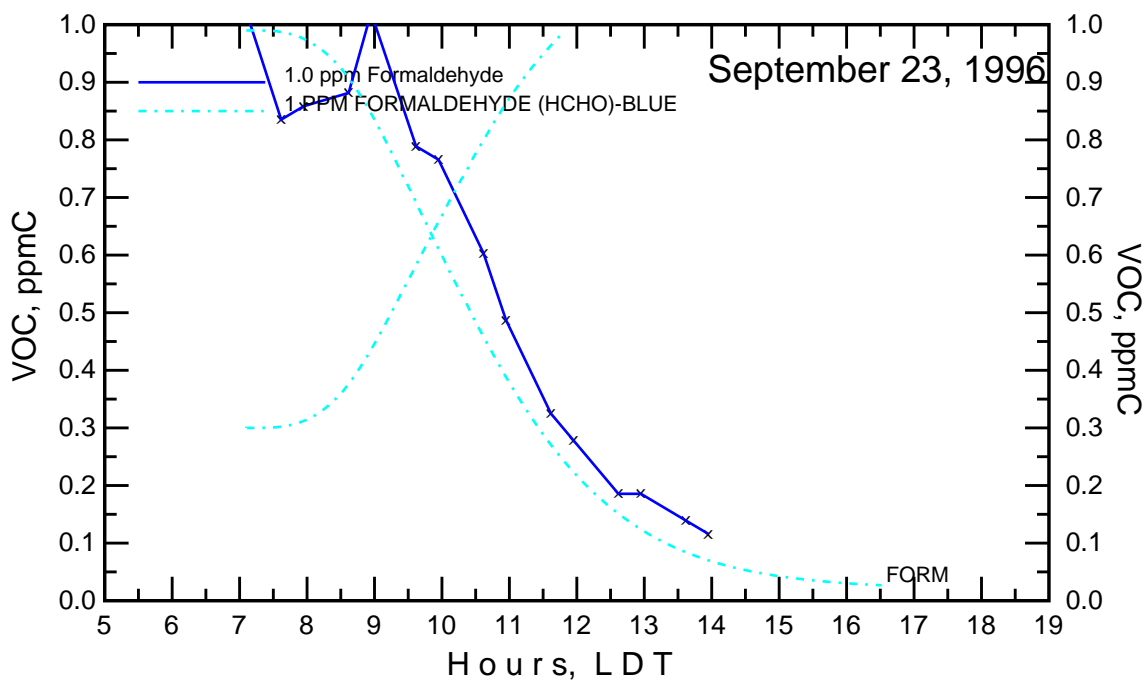

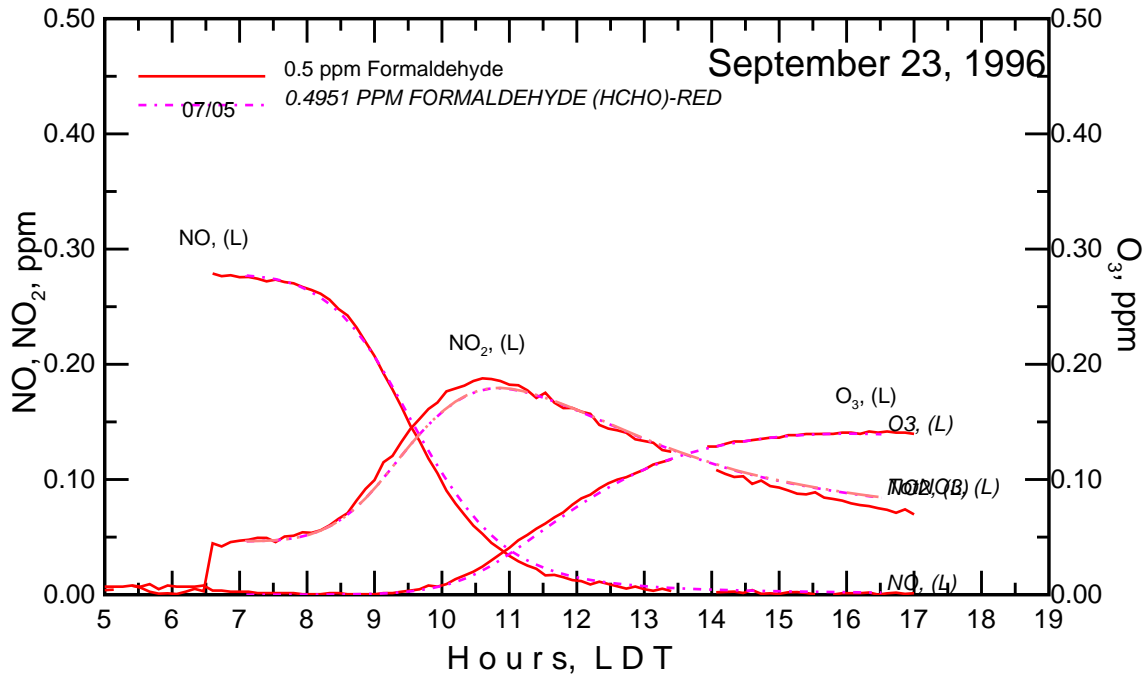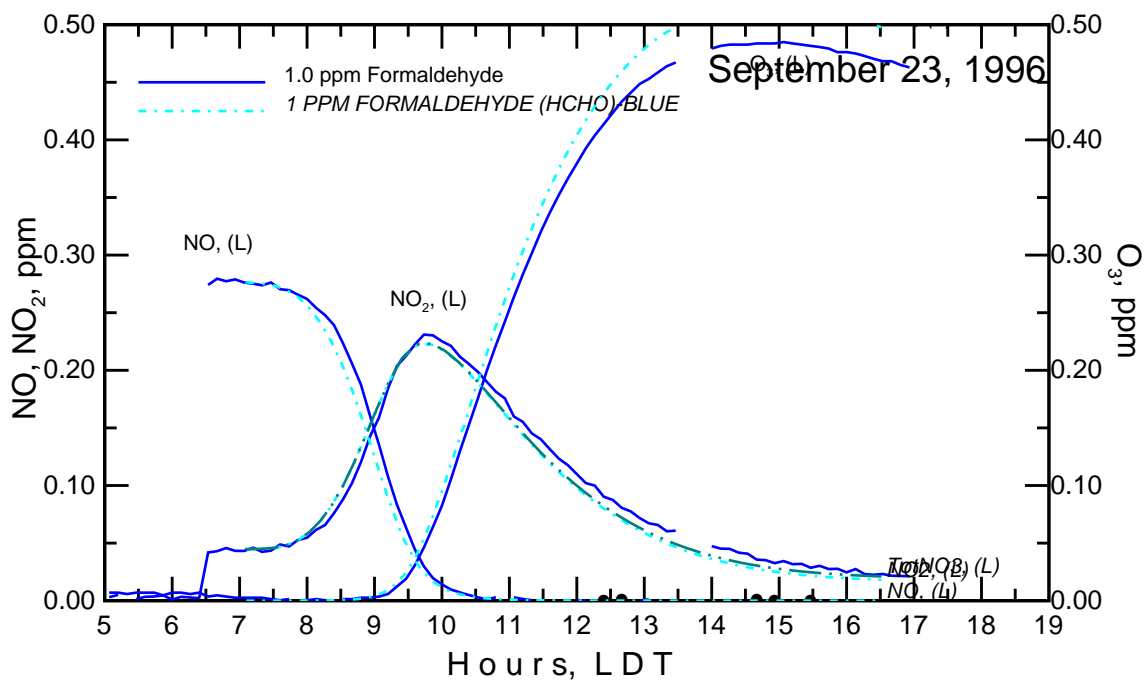

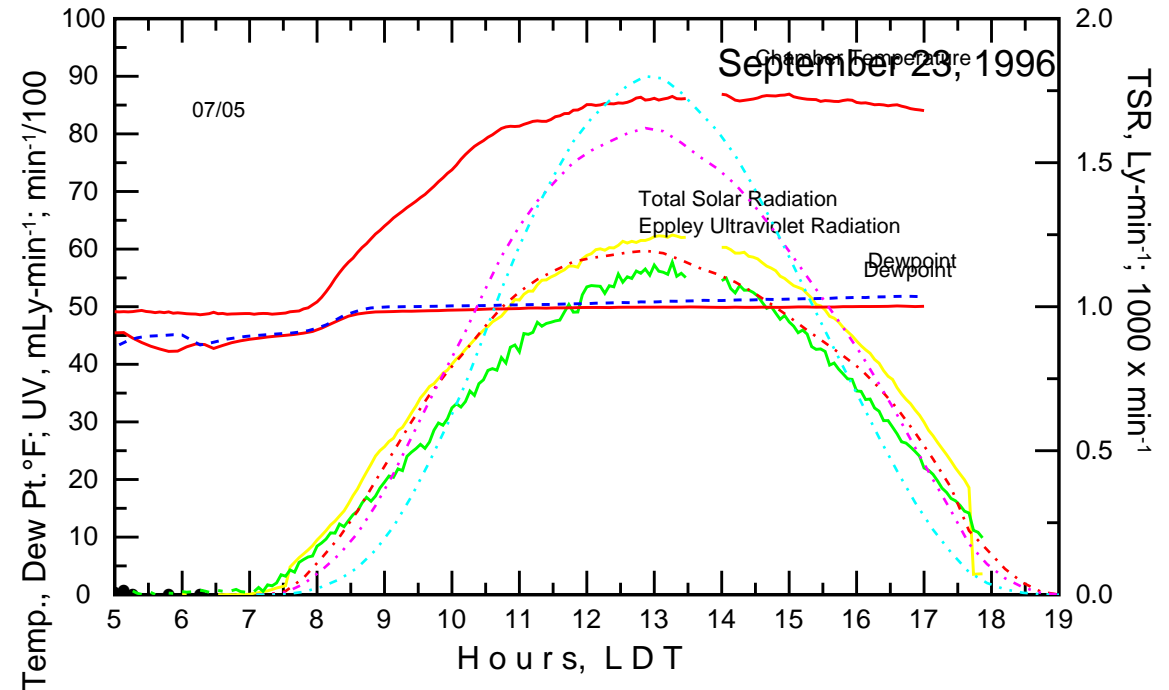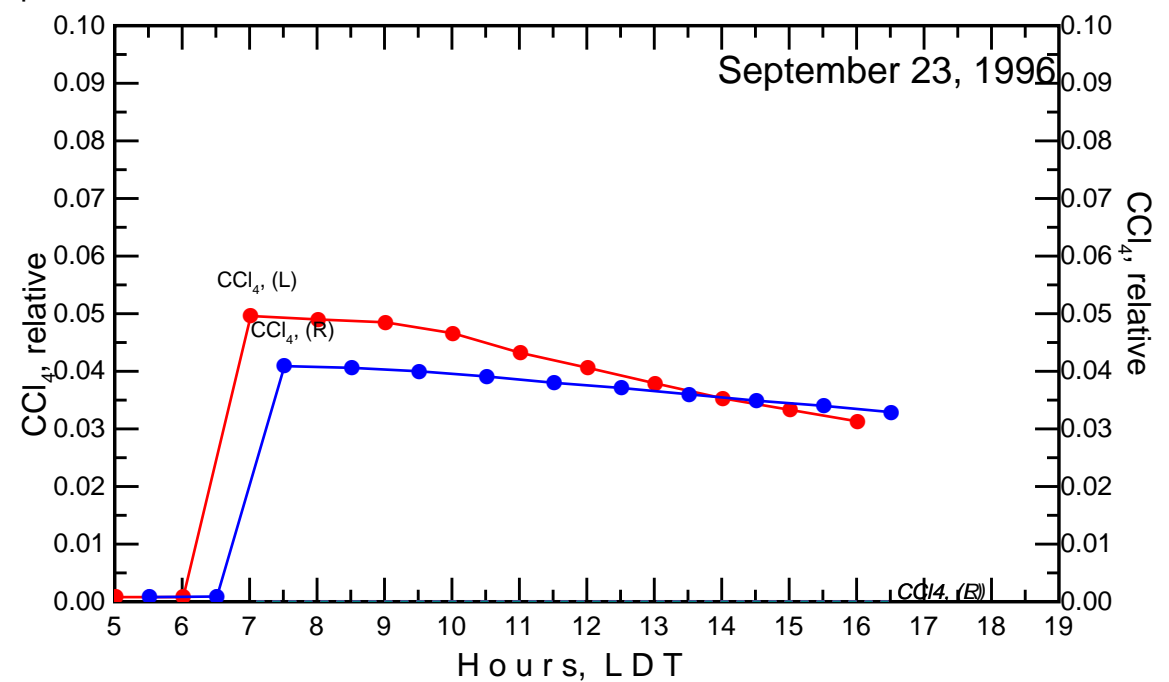

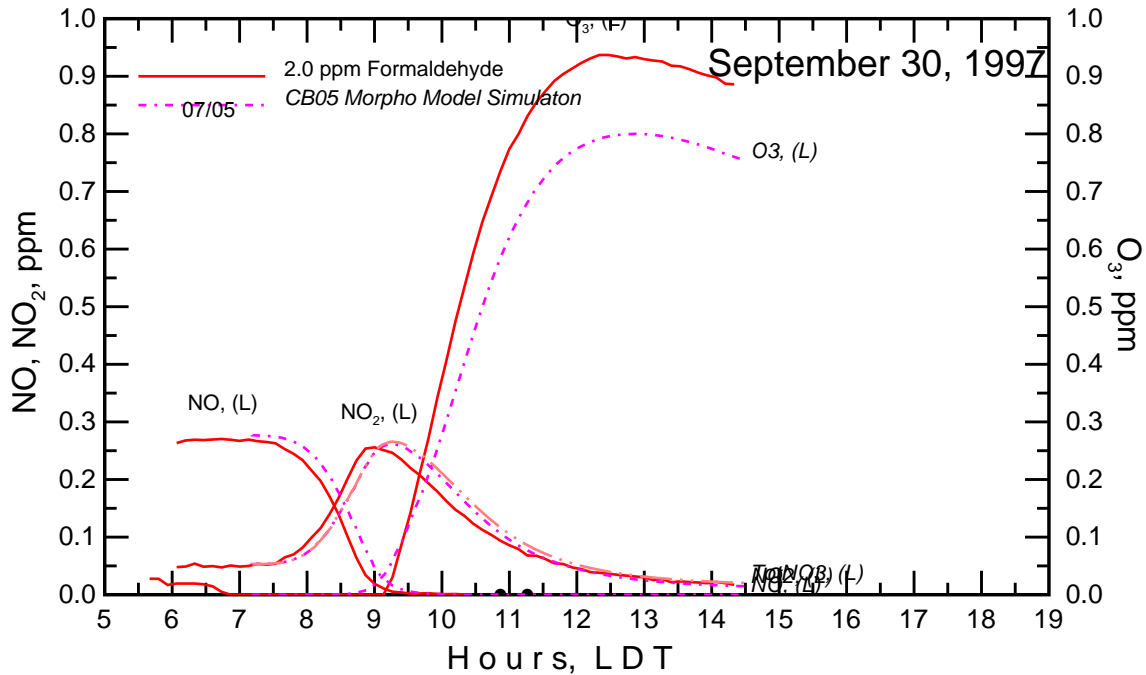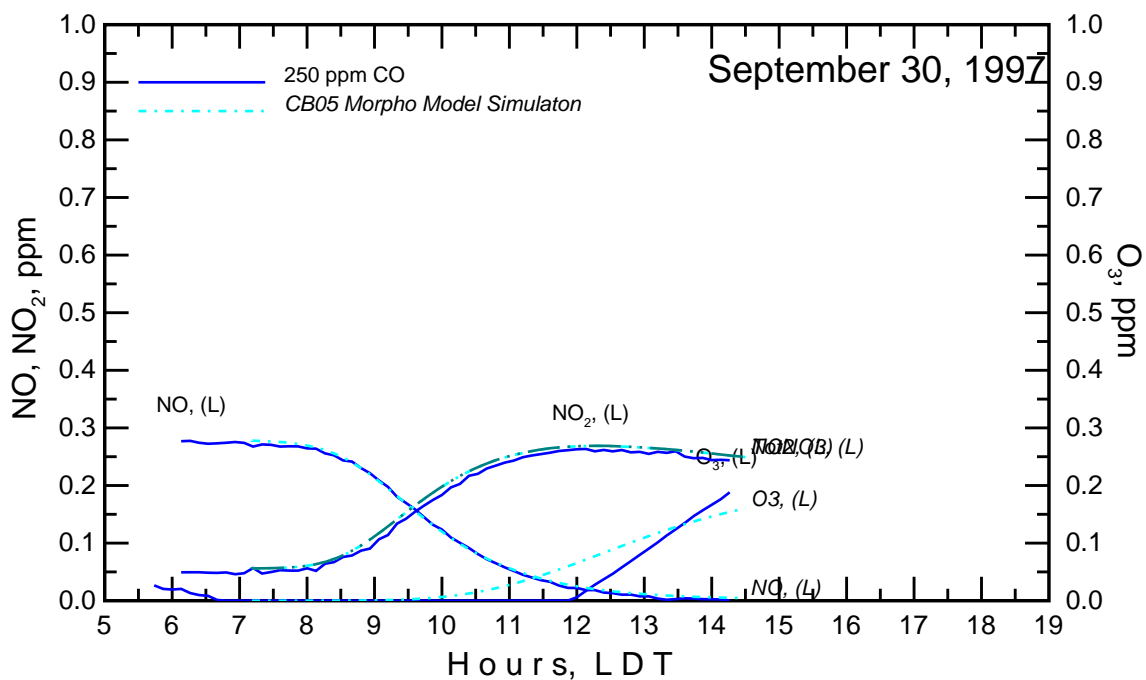

Characterization: Formaldehyde vs CO; matched NO<sub>x</sub>

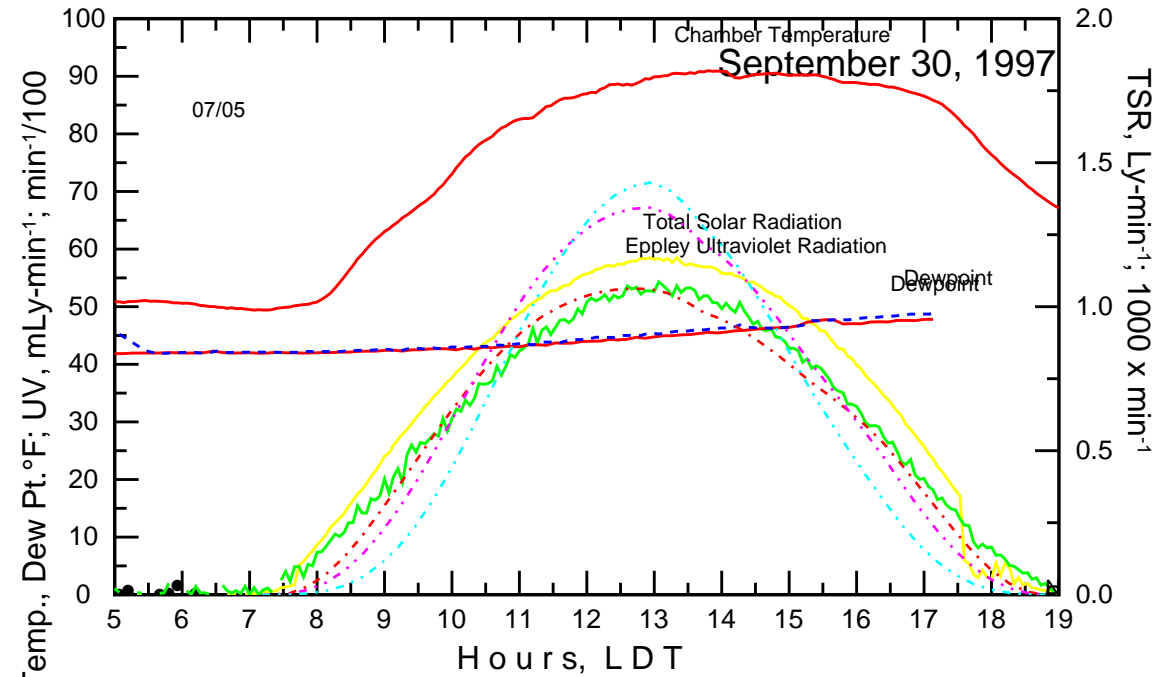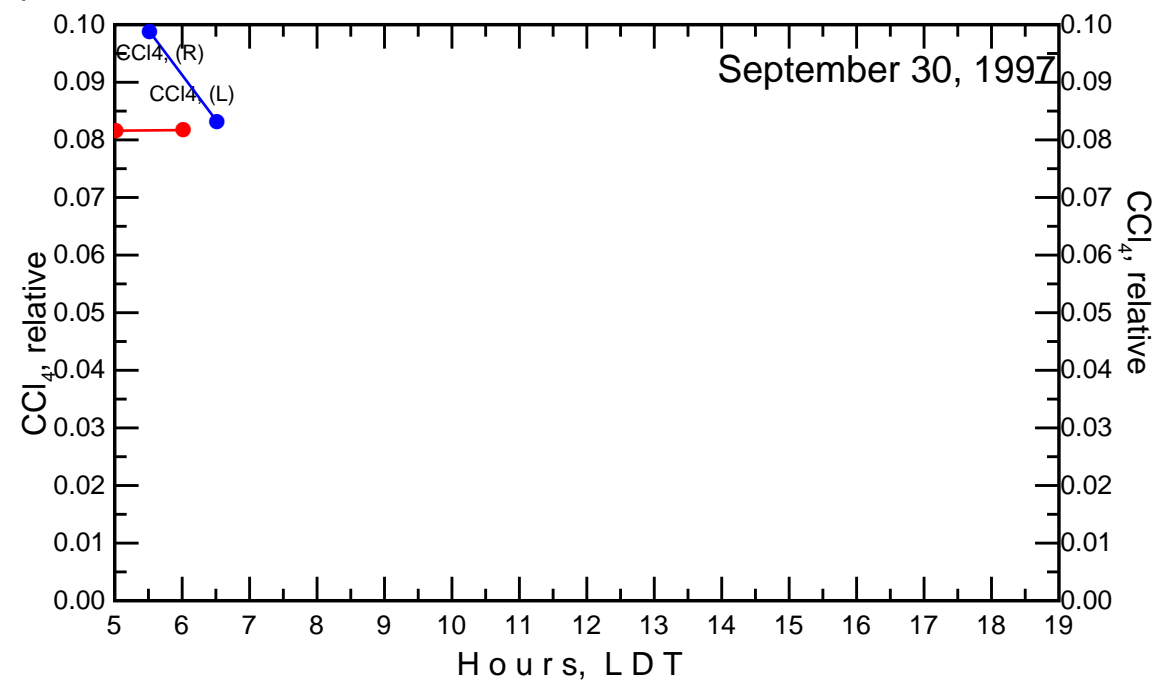

## **Methane (CH<sub>4</sub>)**

JL 21 91  
AU 01 97  
AU10 92  
ST 07 90  
ST 19 96  
ST 20 93

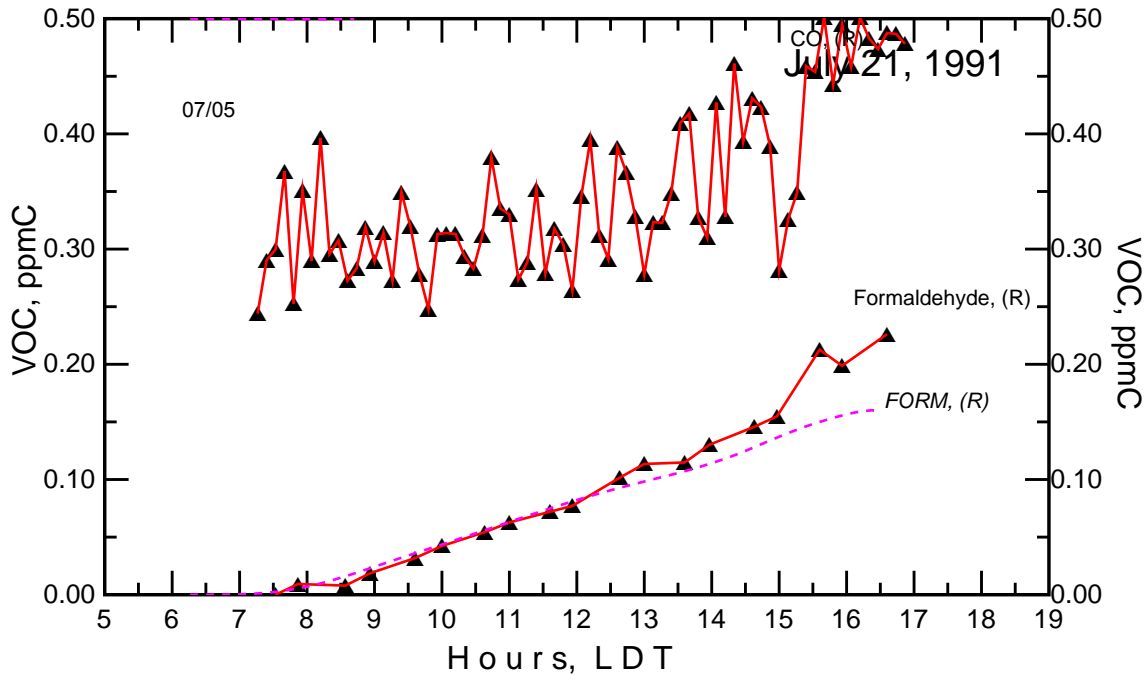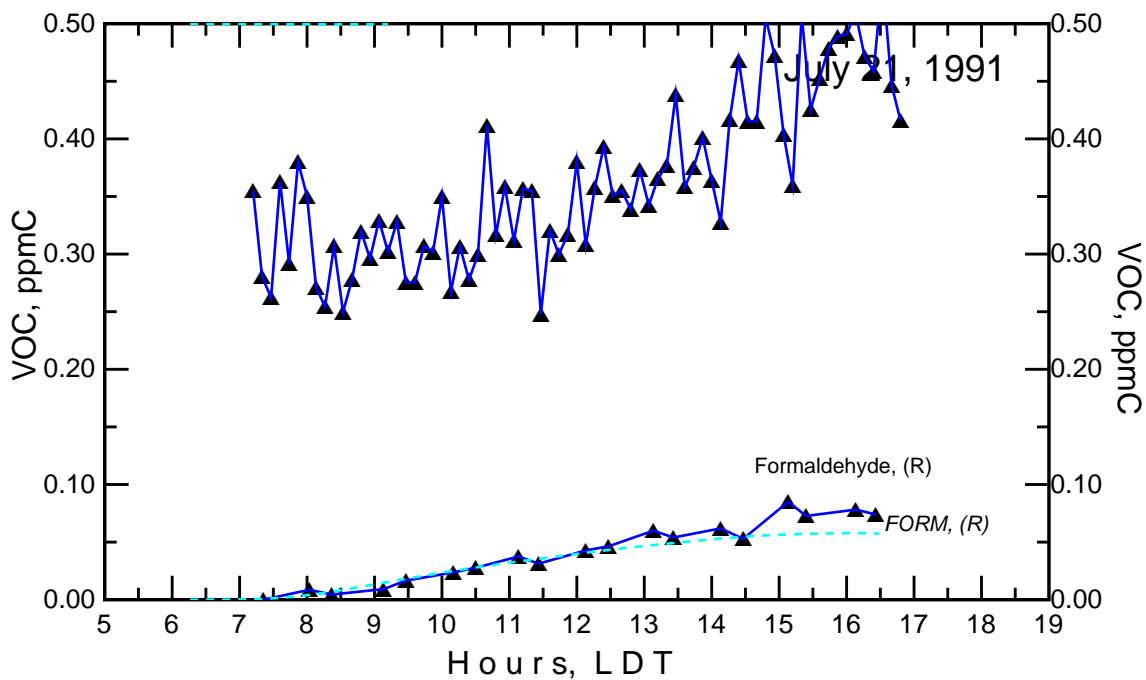

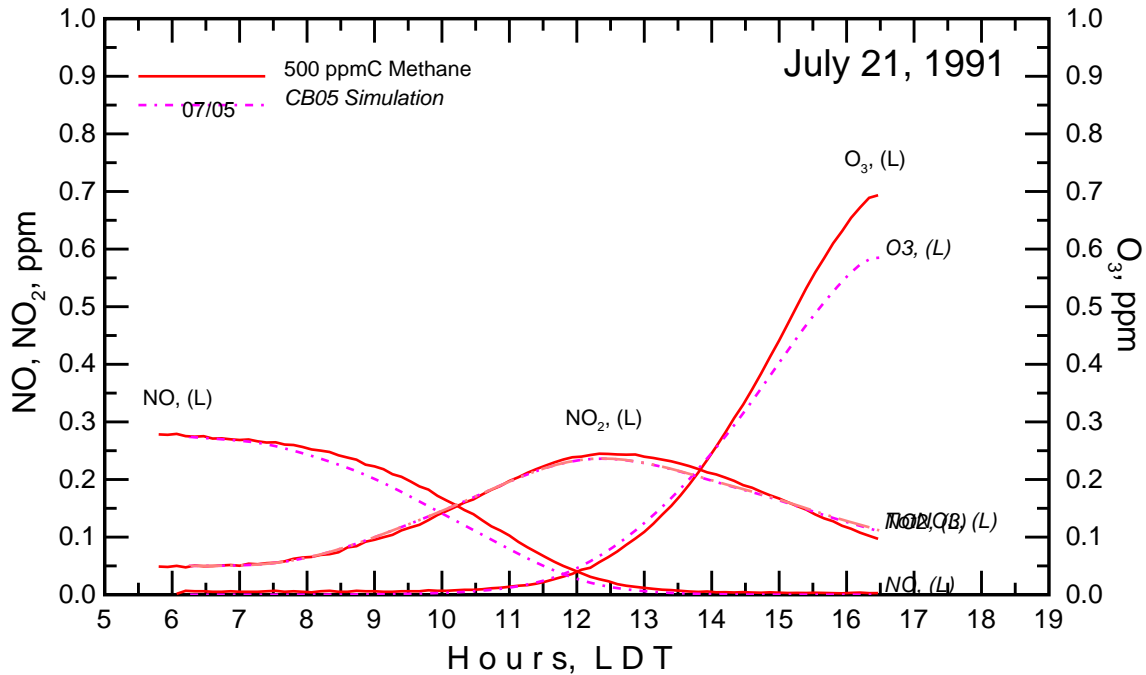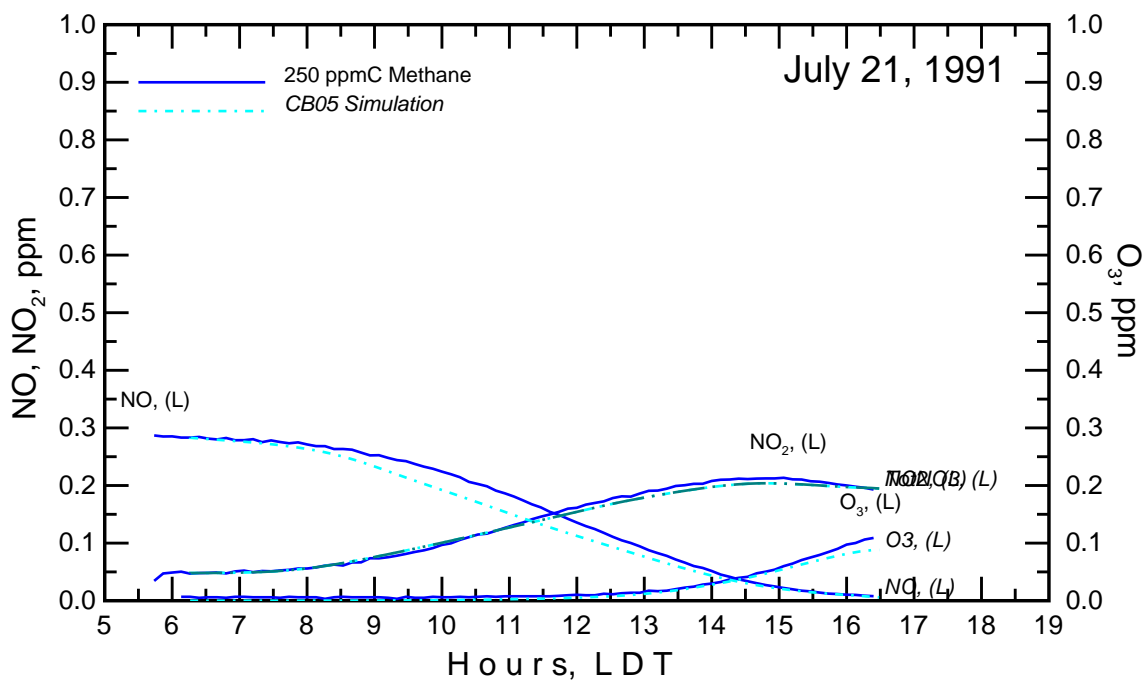

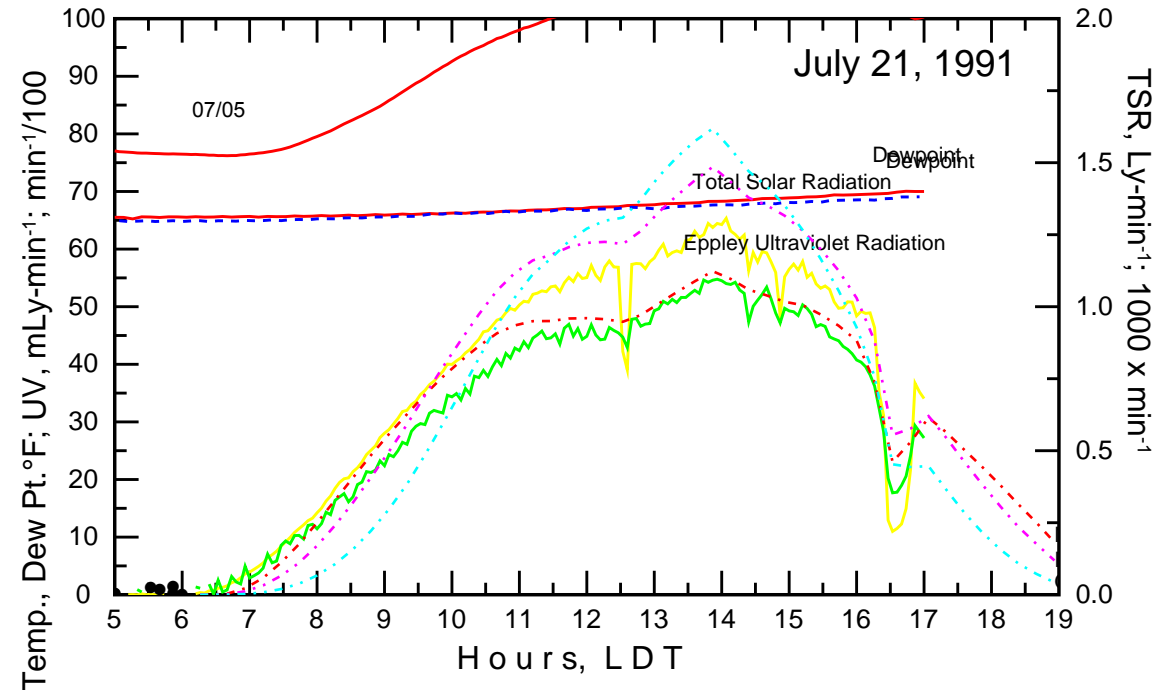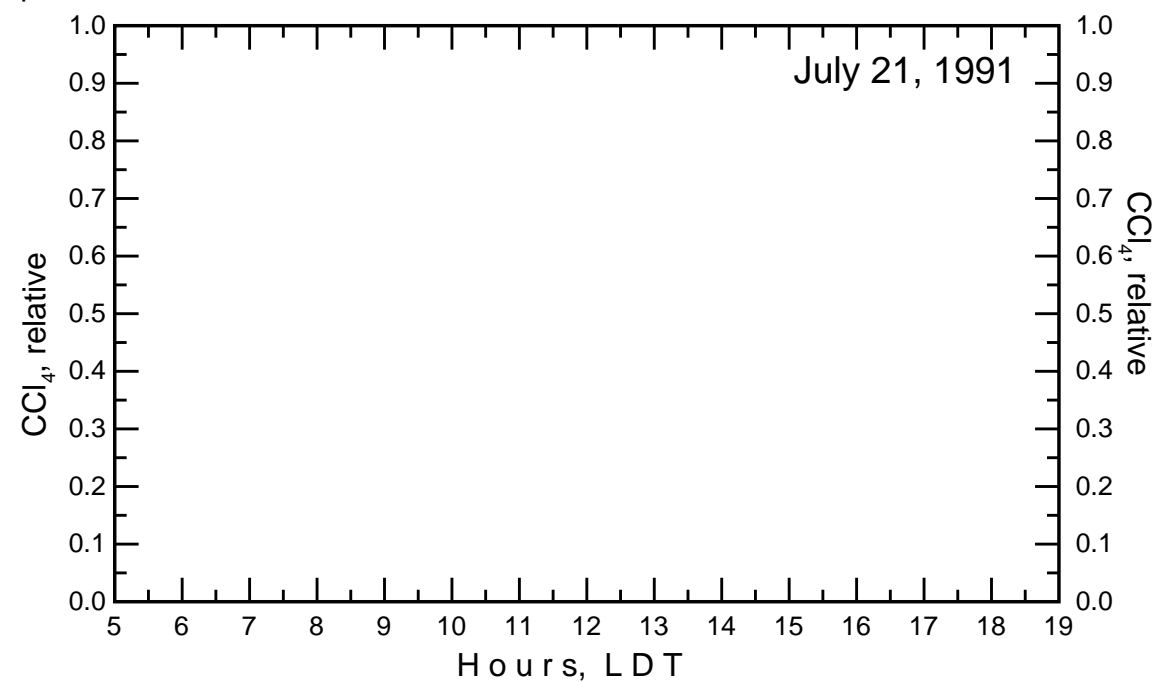

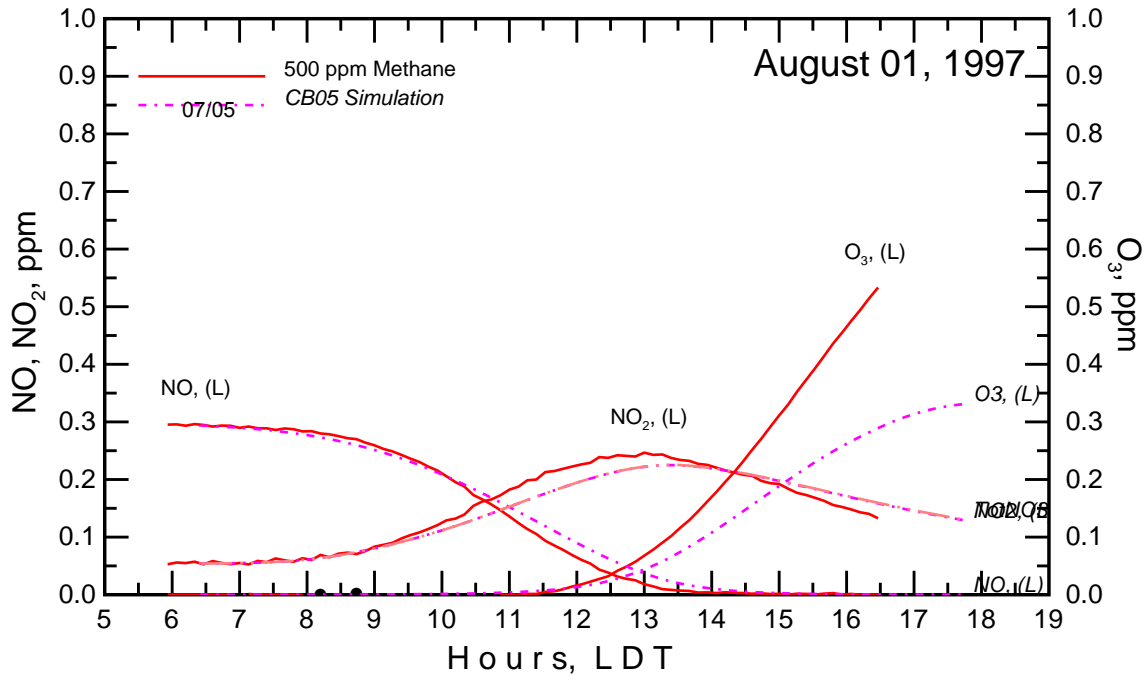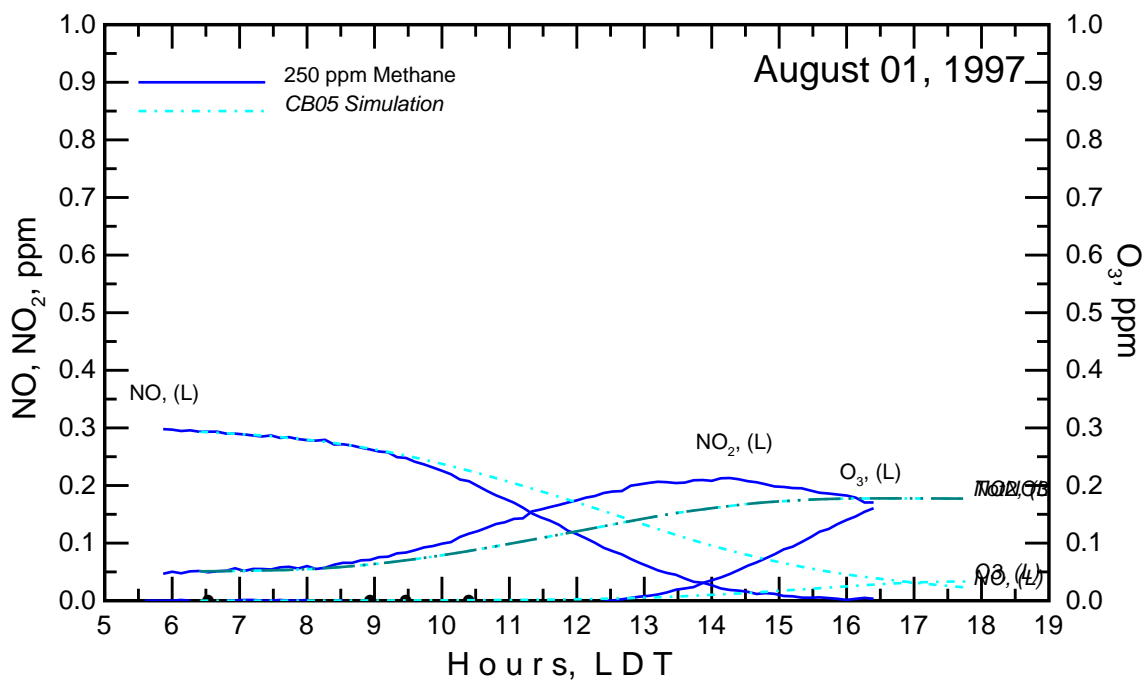

250 vs 500 ppm Methane; 0.35 NOx

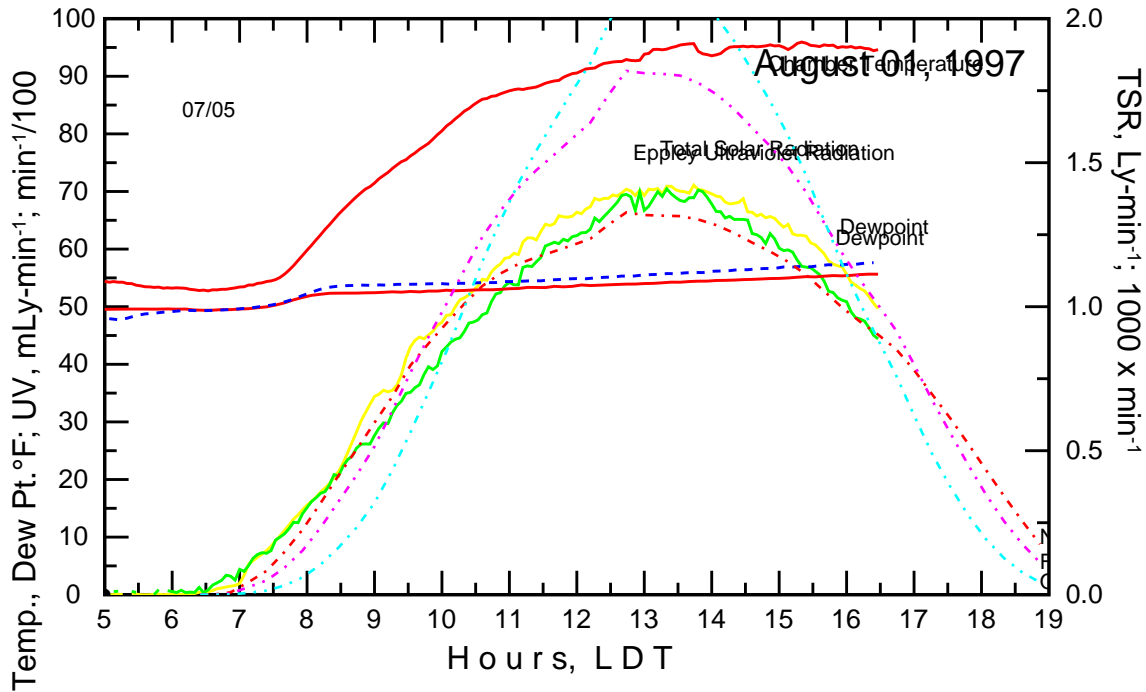

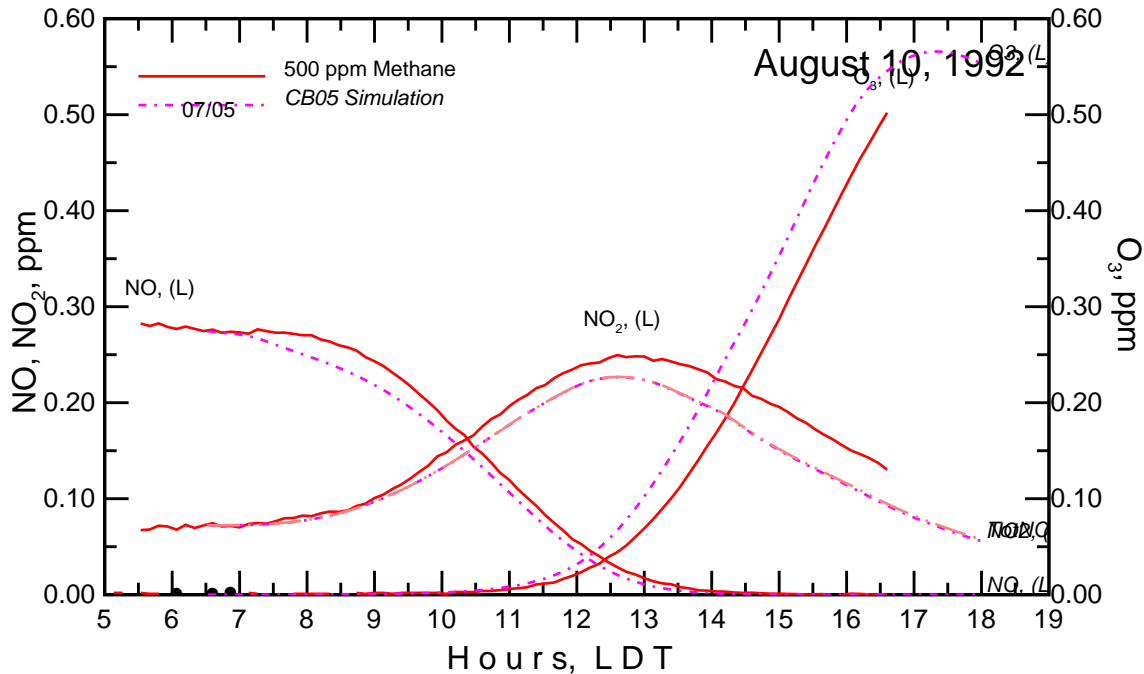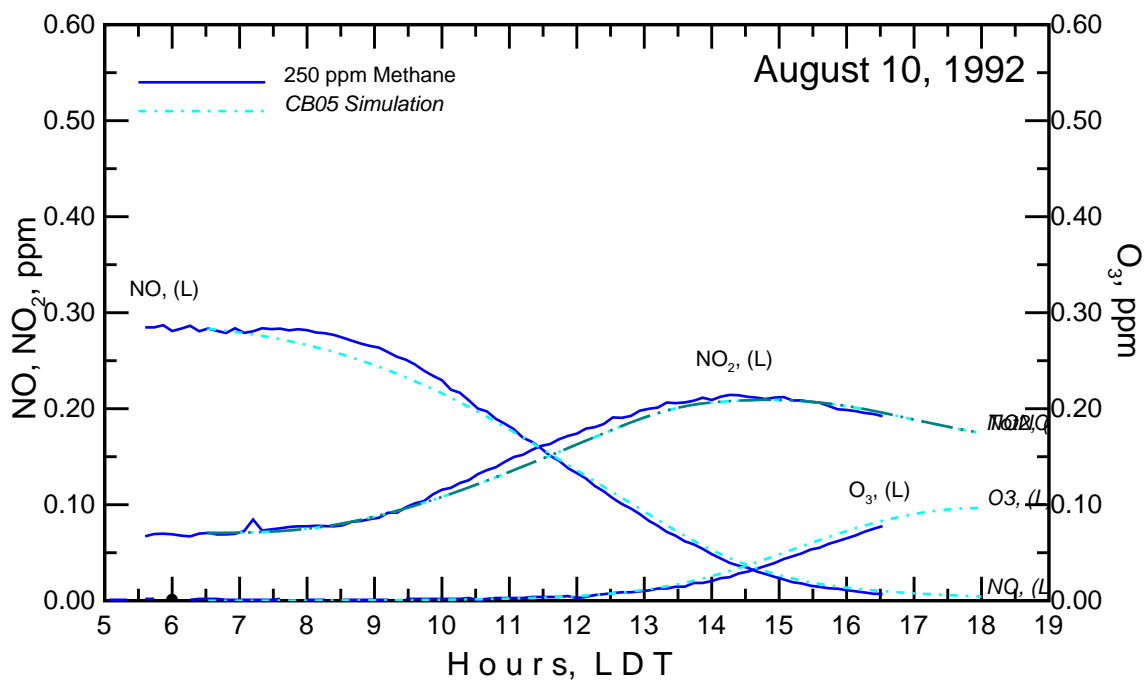

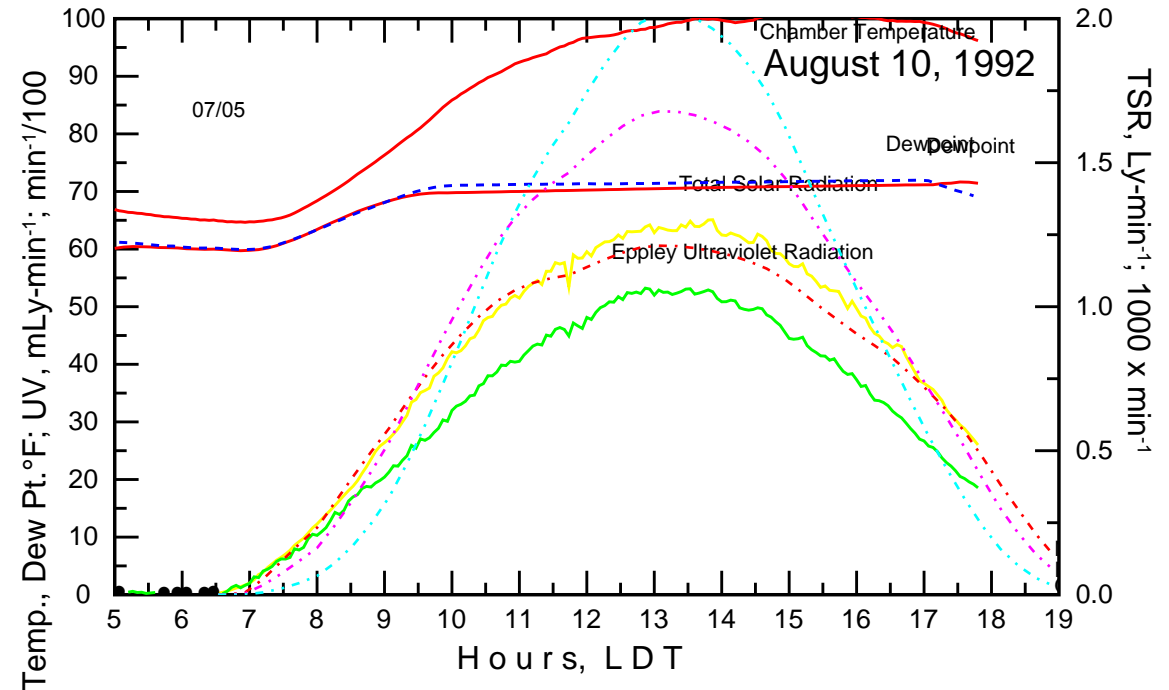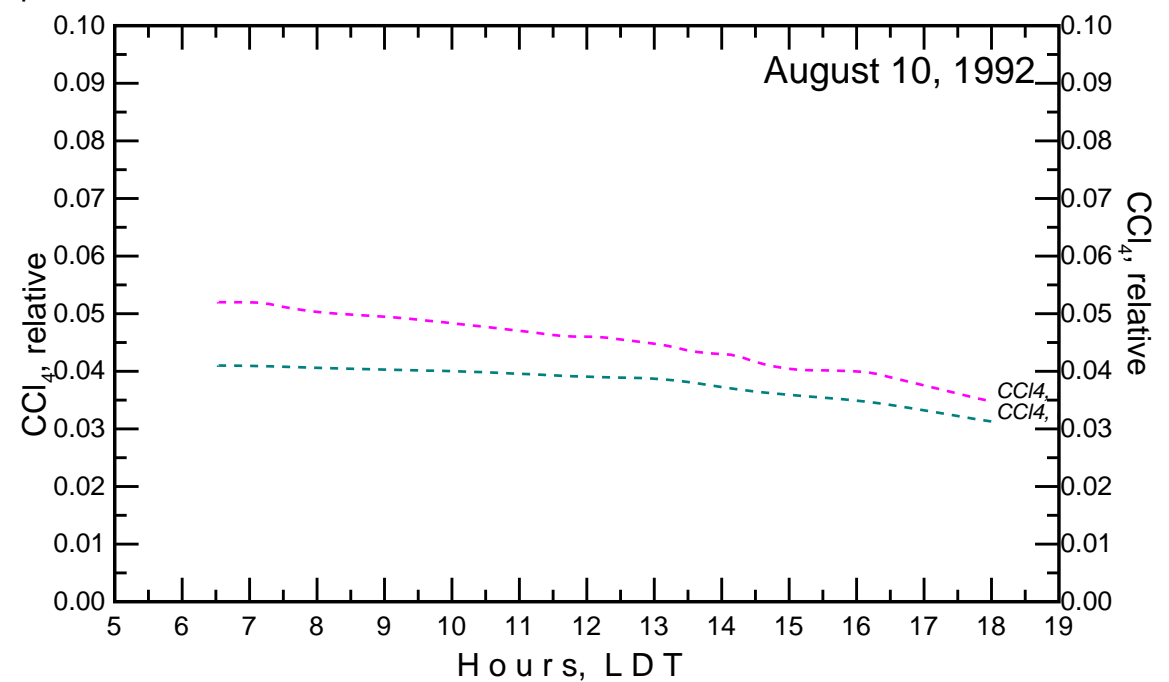

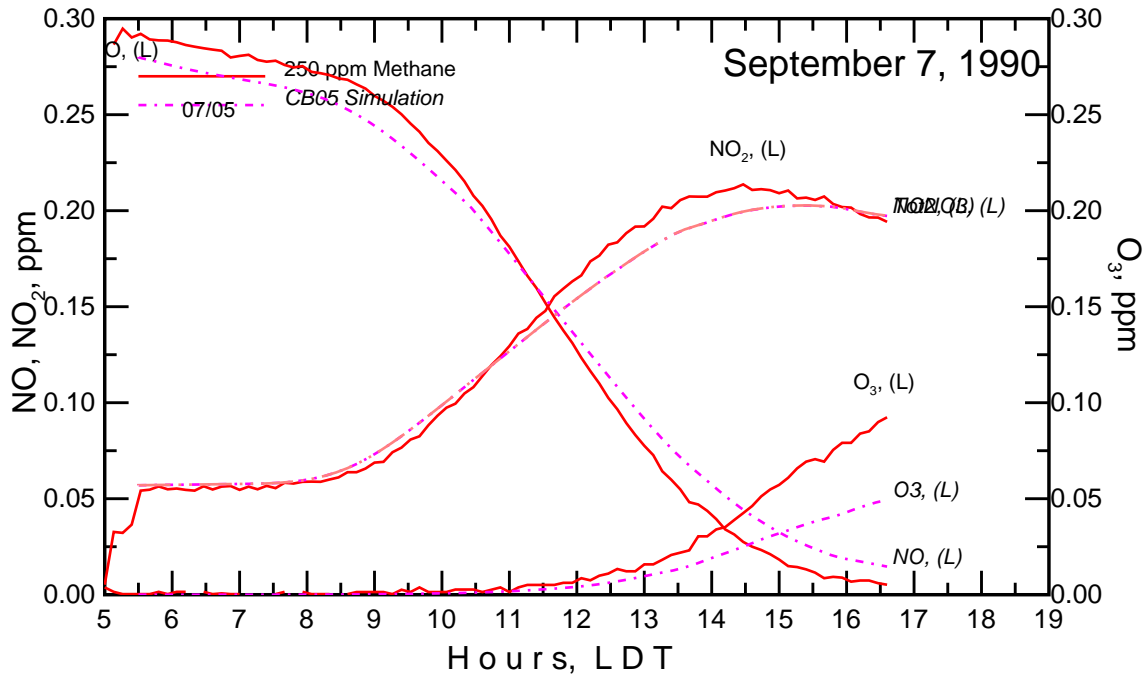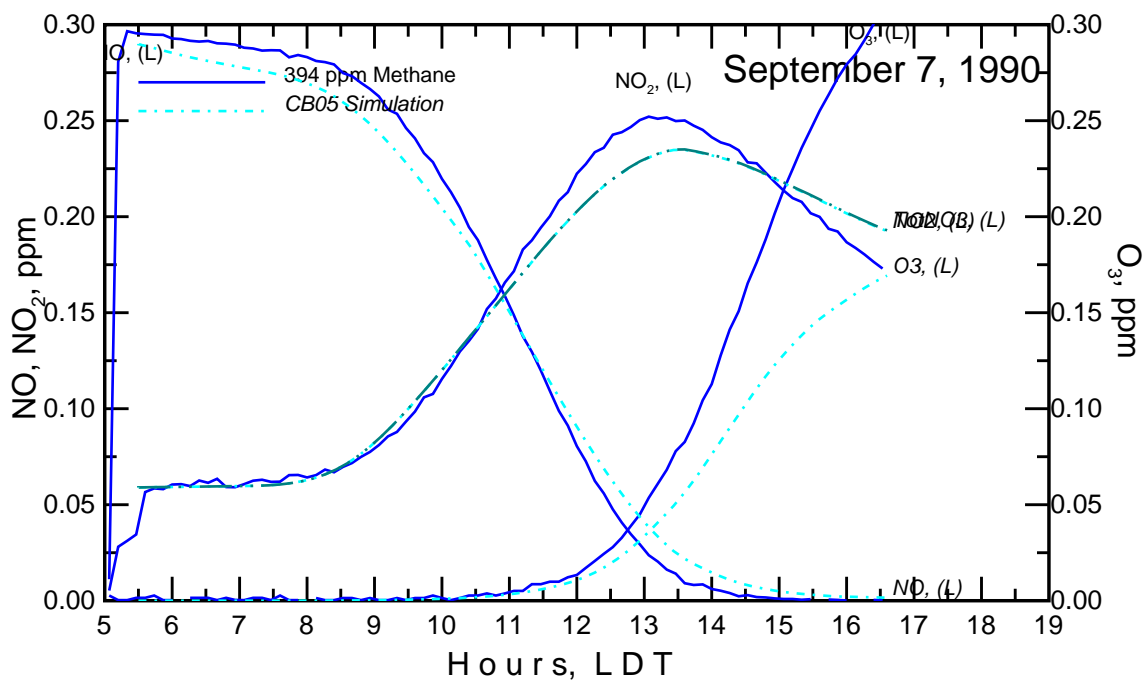

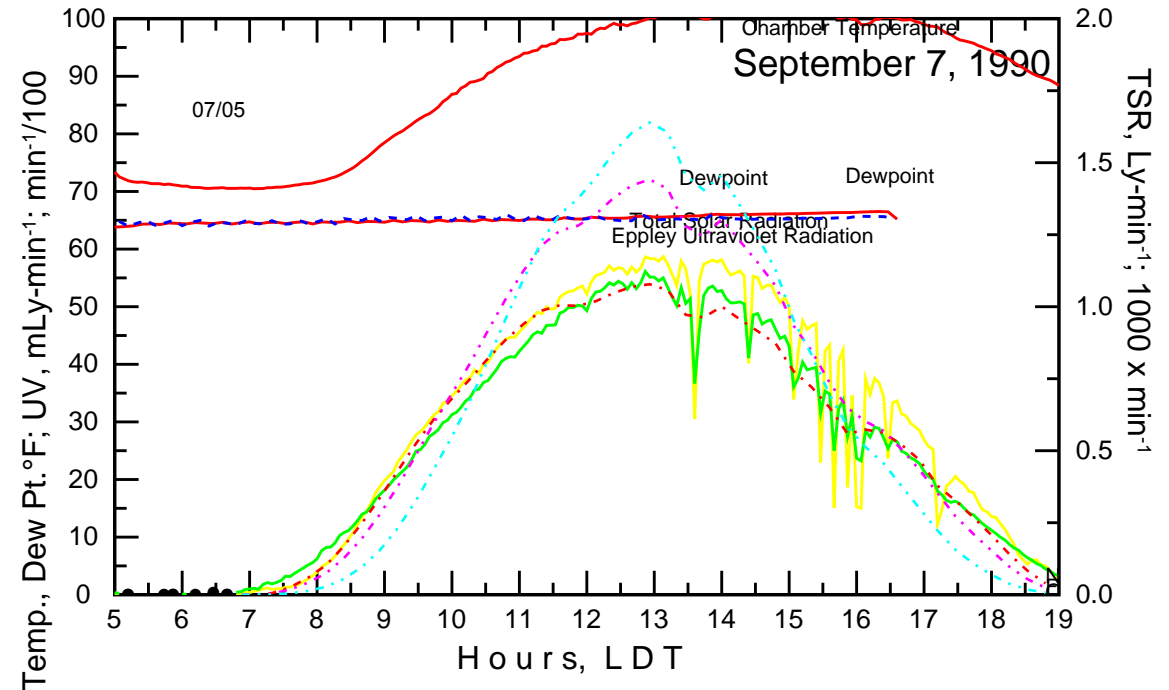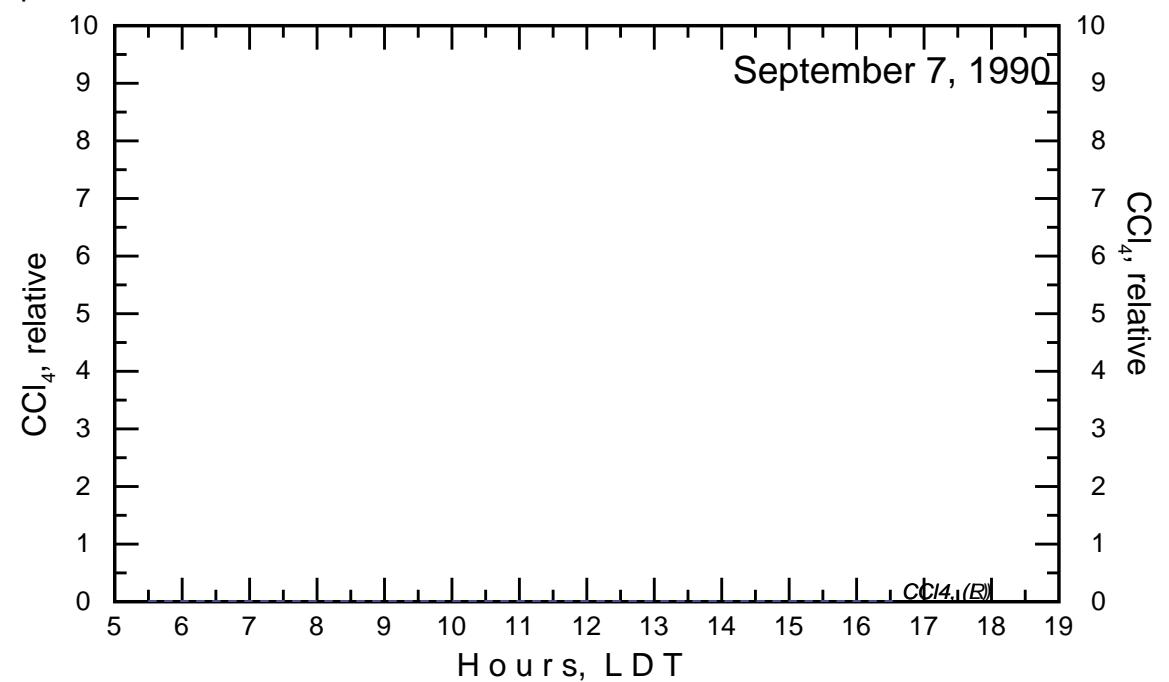

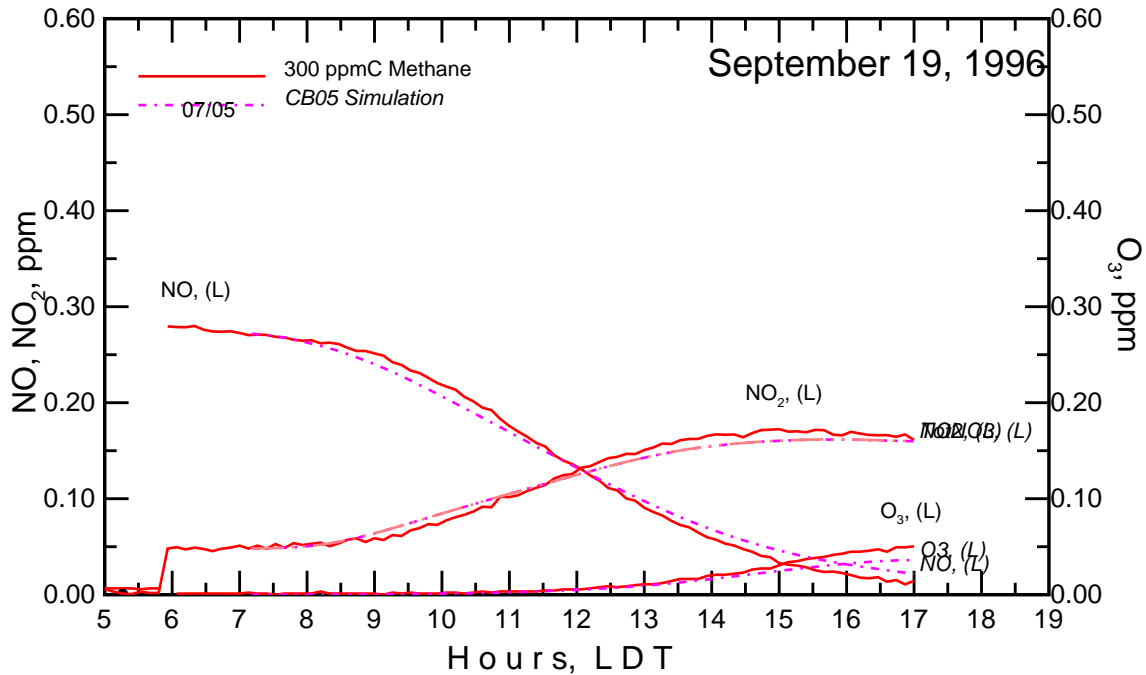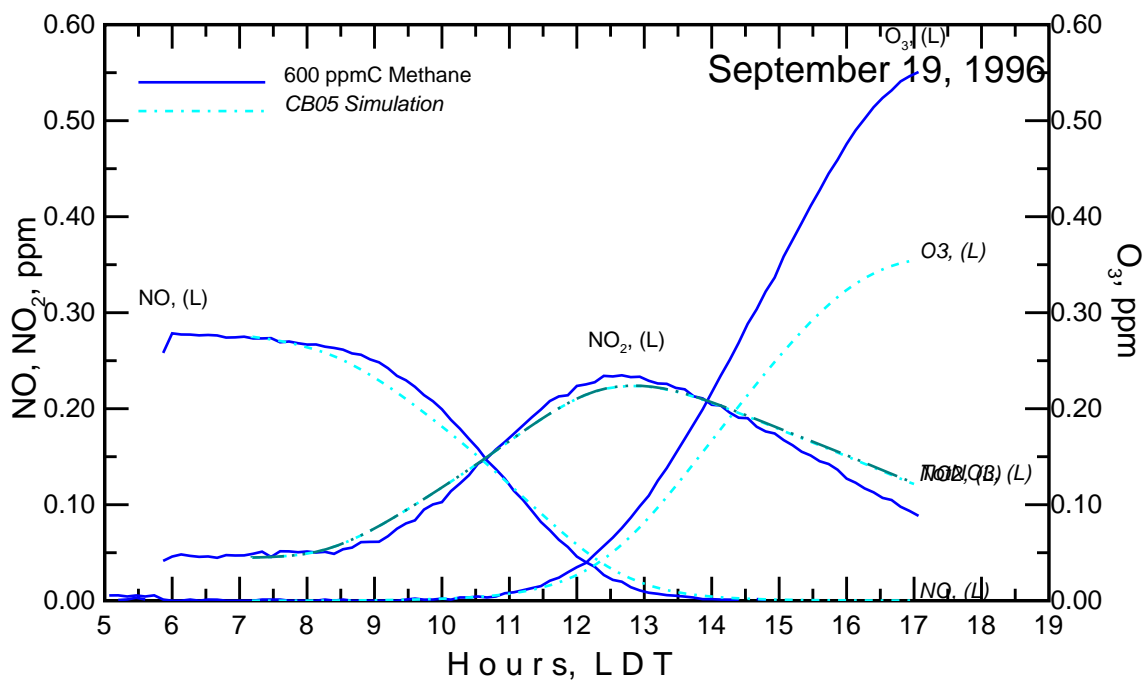

Delta Methane

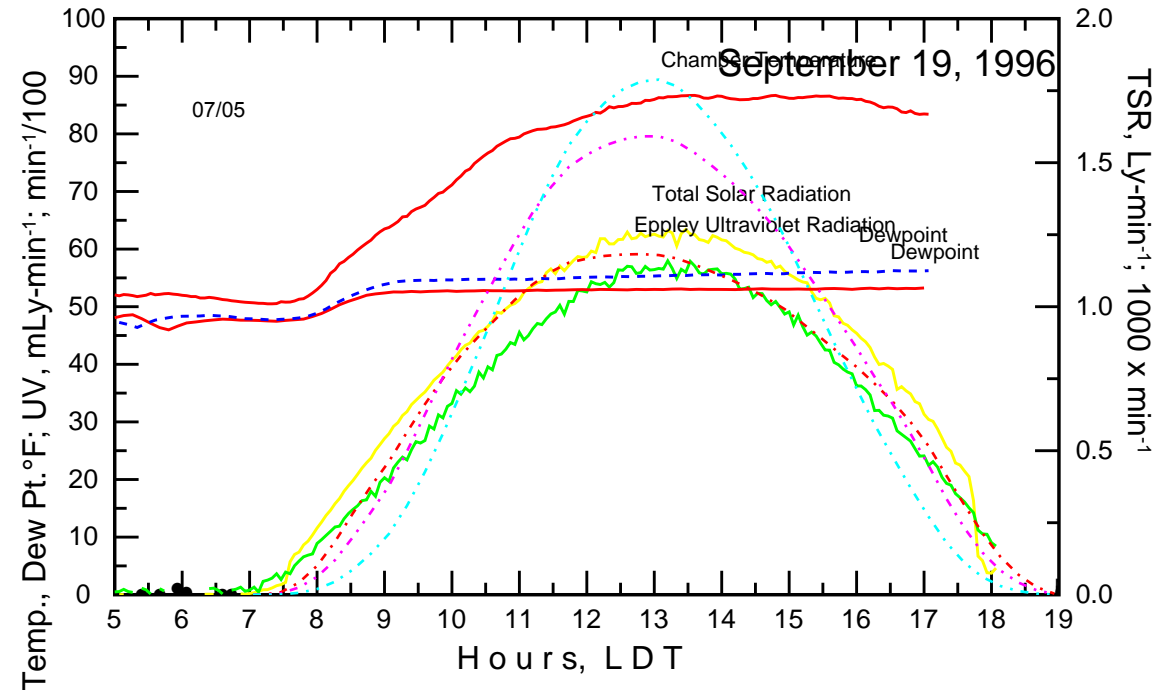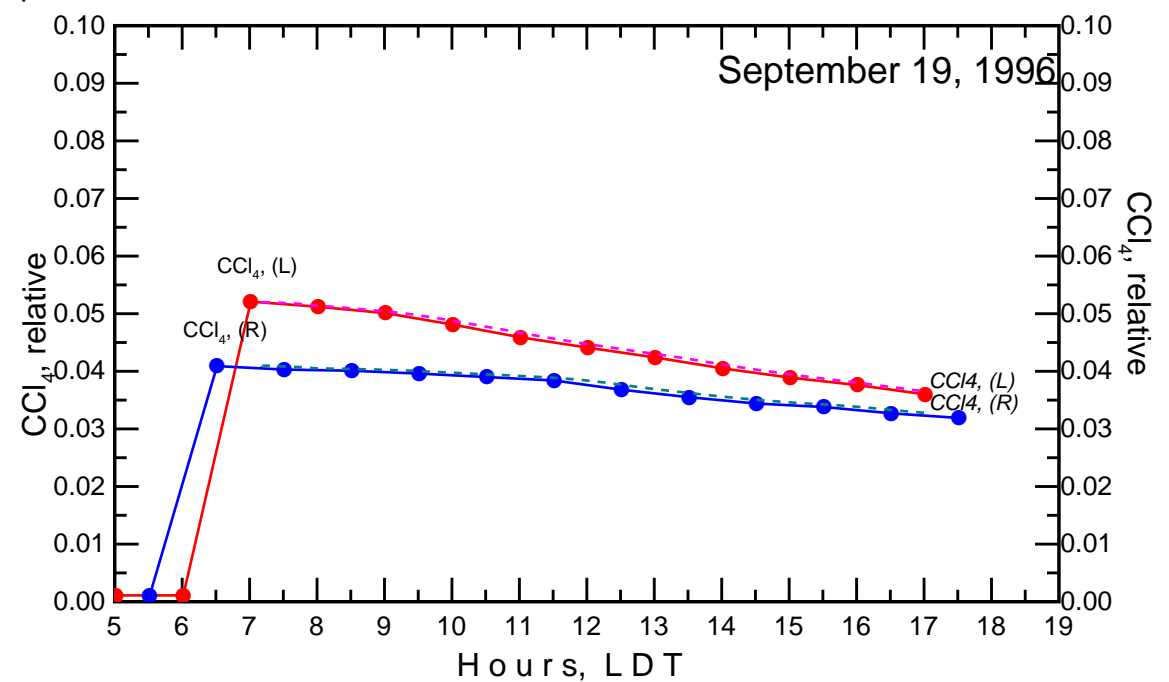

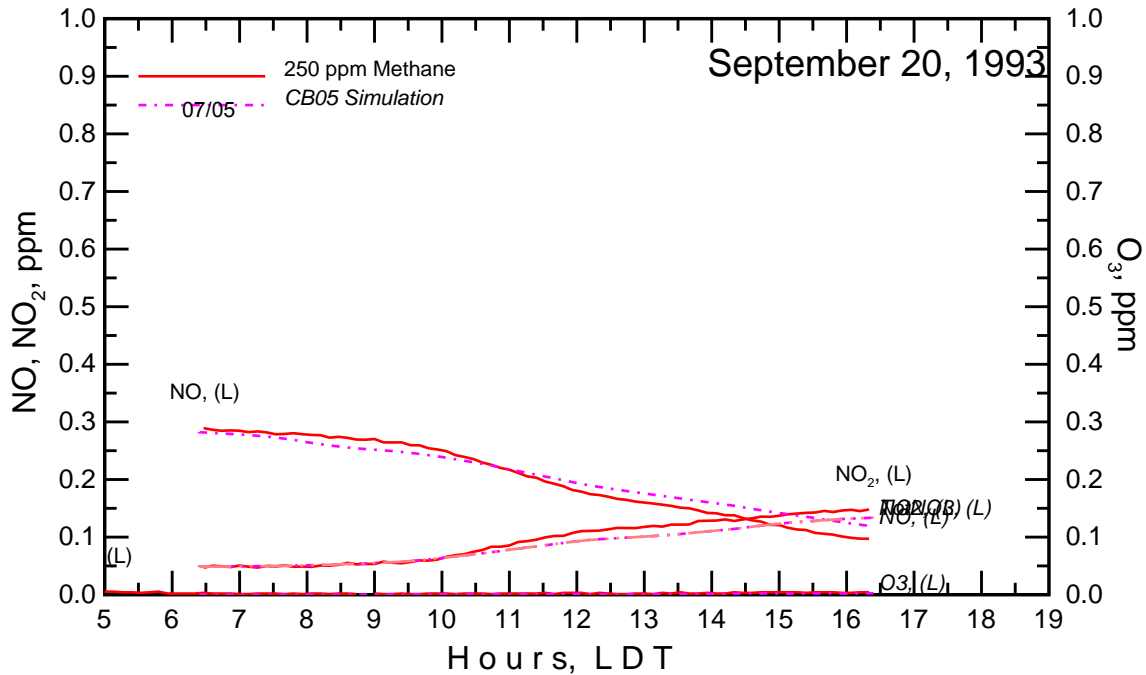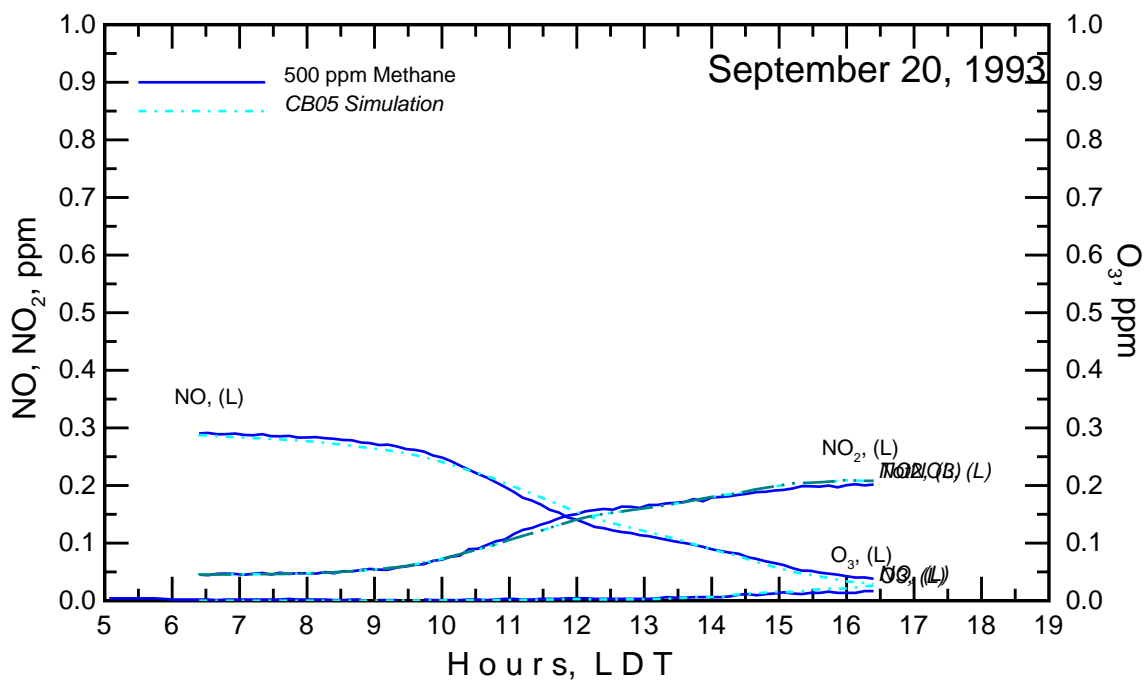

500 vs 250 Methane

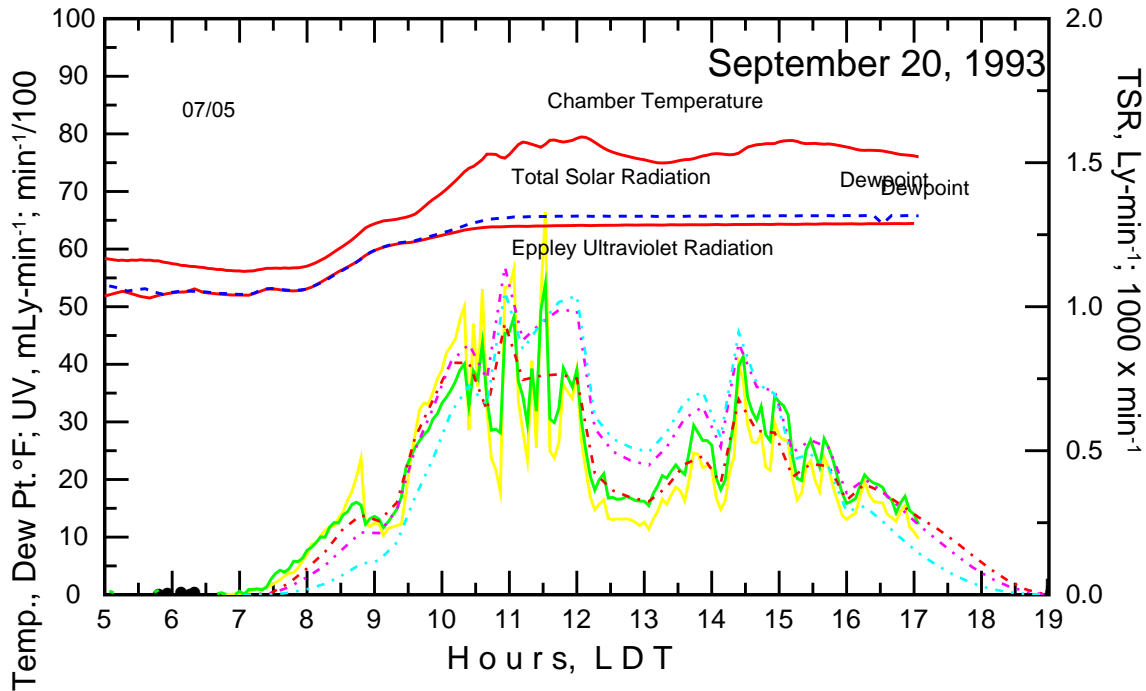

**Acetaldehyde (ALD2)**

JL 09 97  
JL 18 97  
AU 17 78

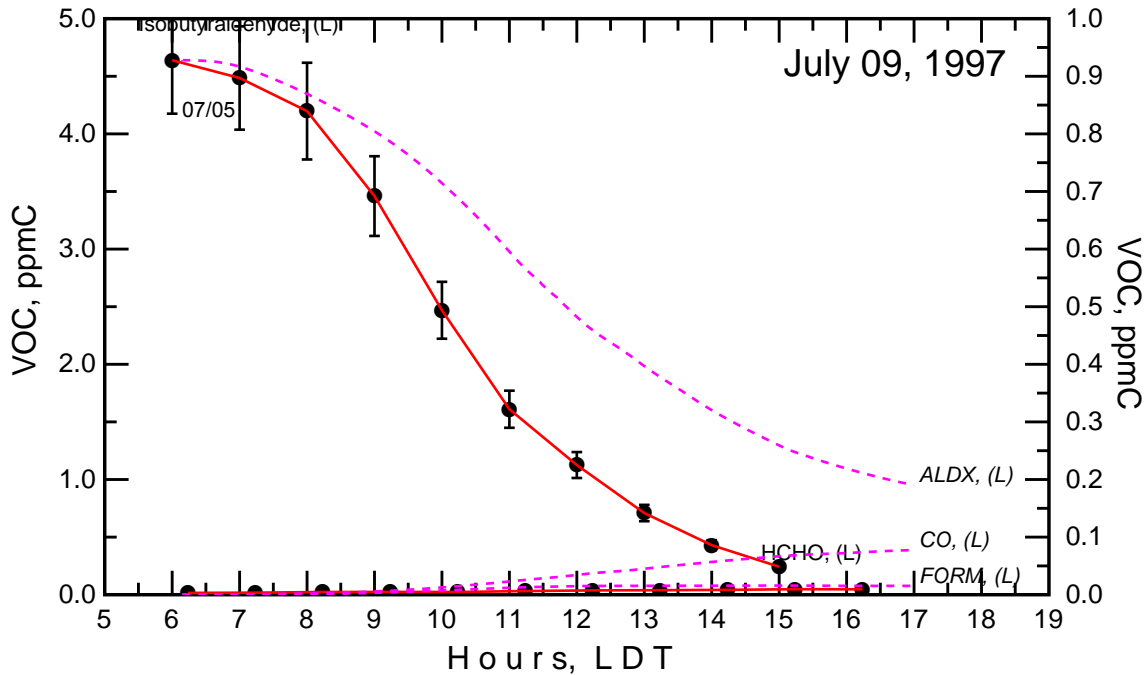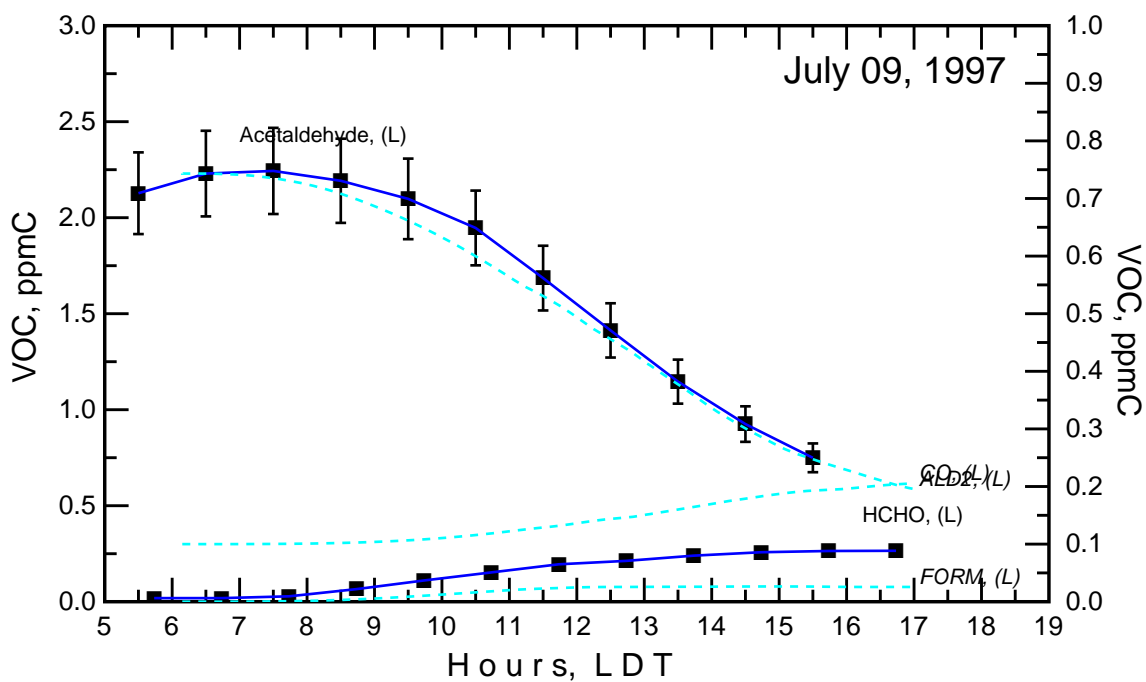

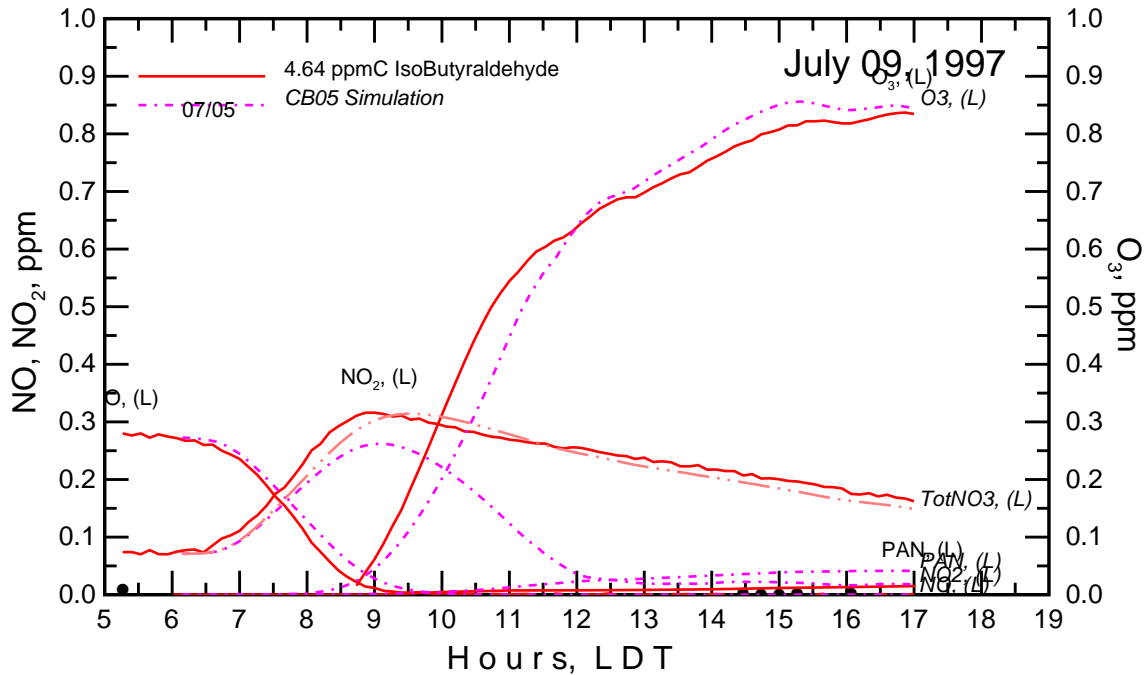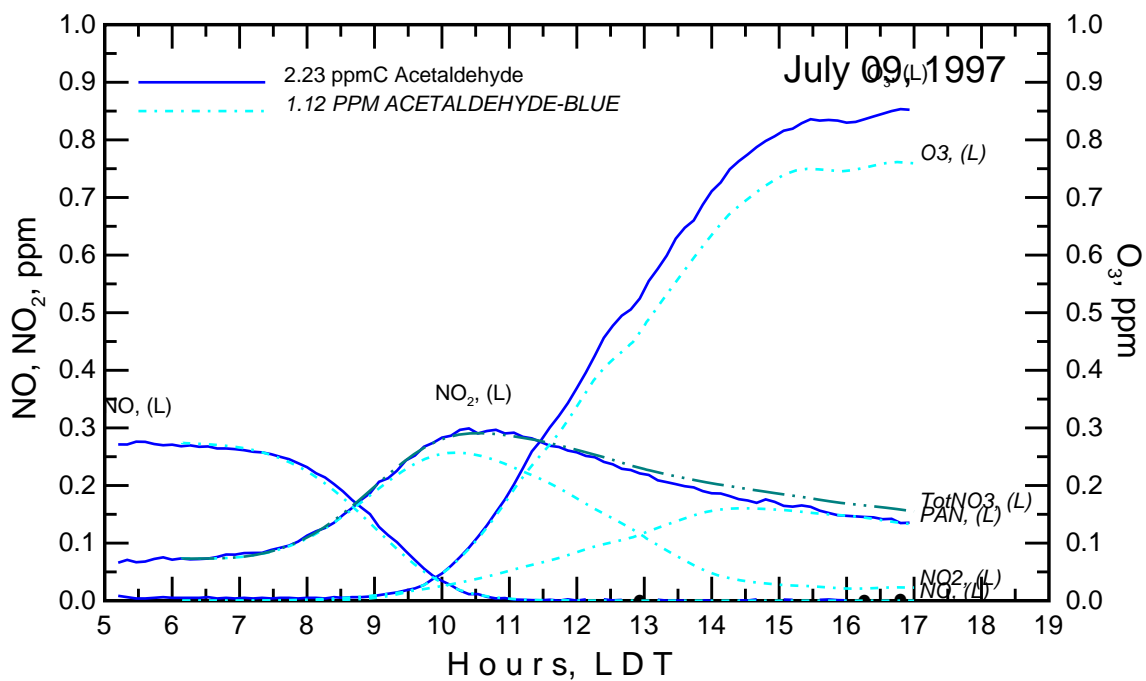

Acetaldehyde vs Isobutyraldehyde

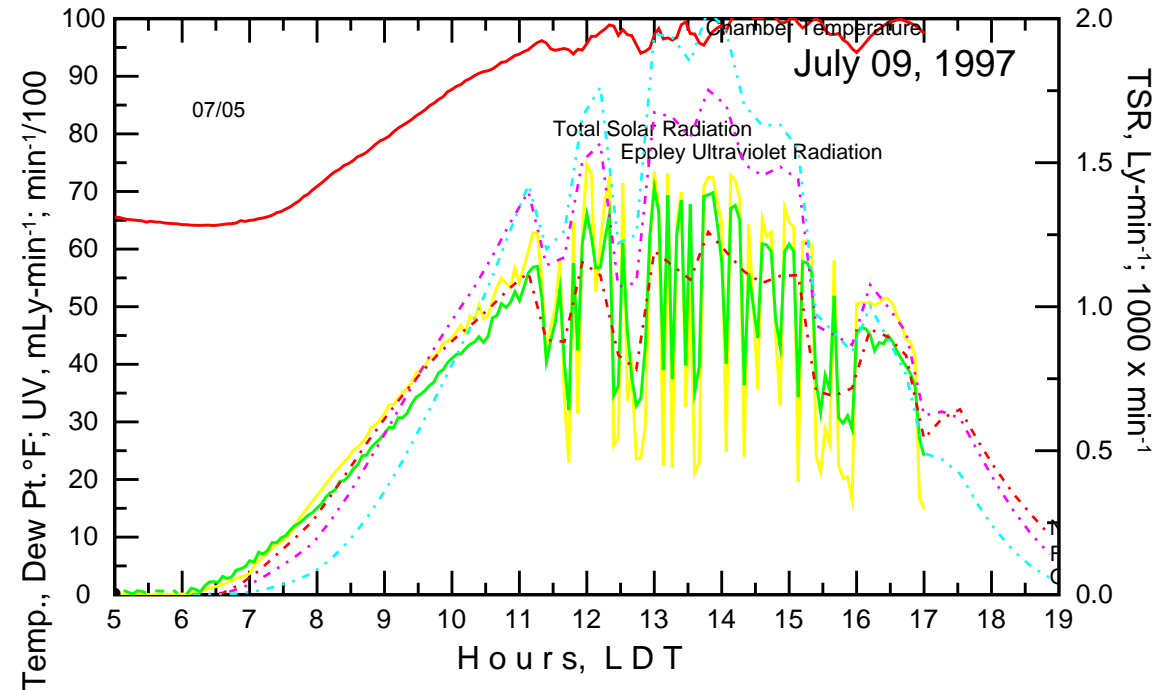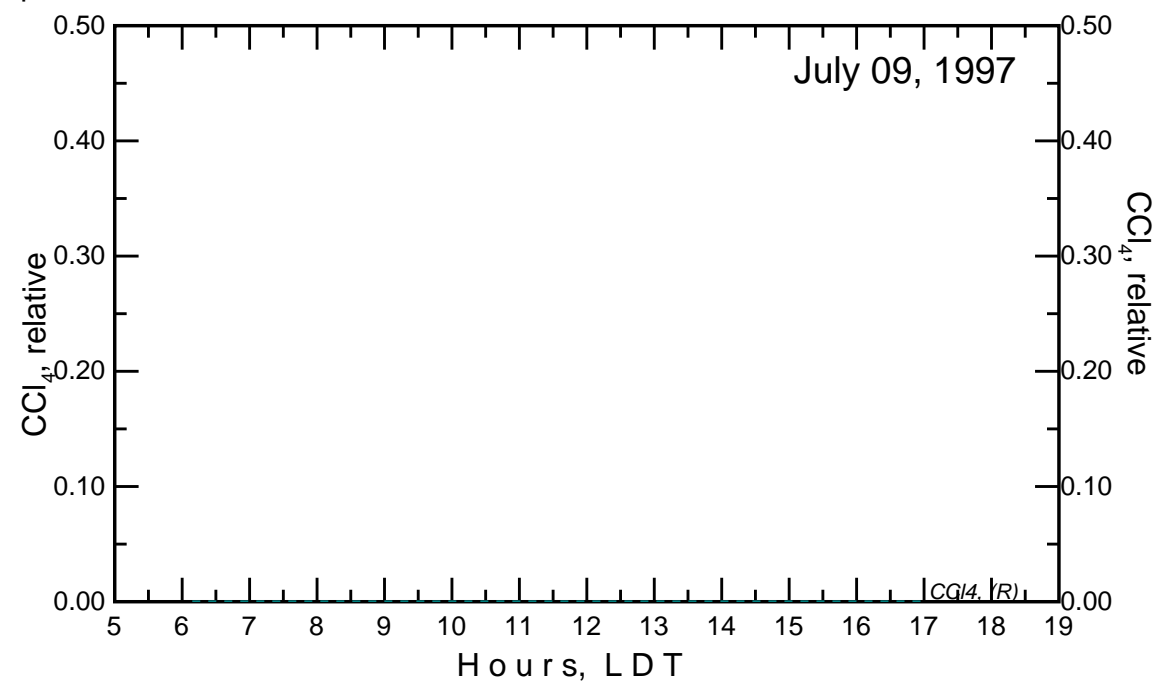

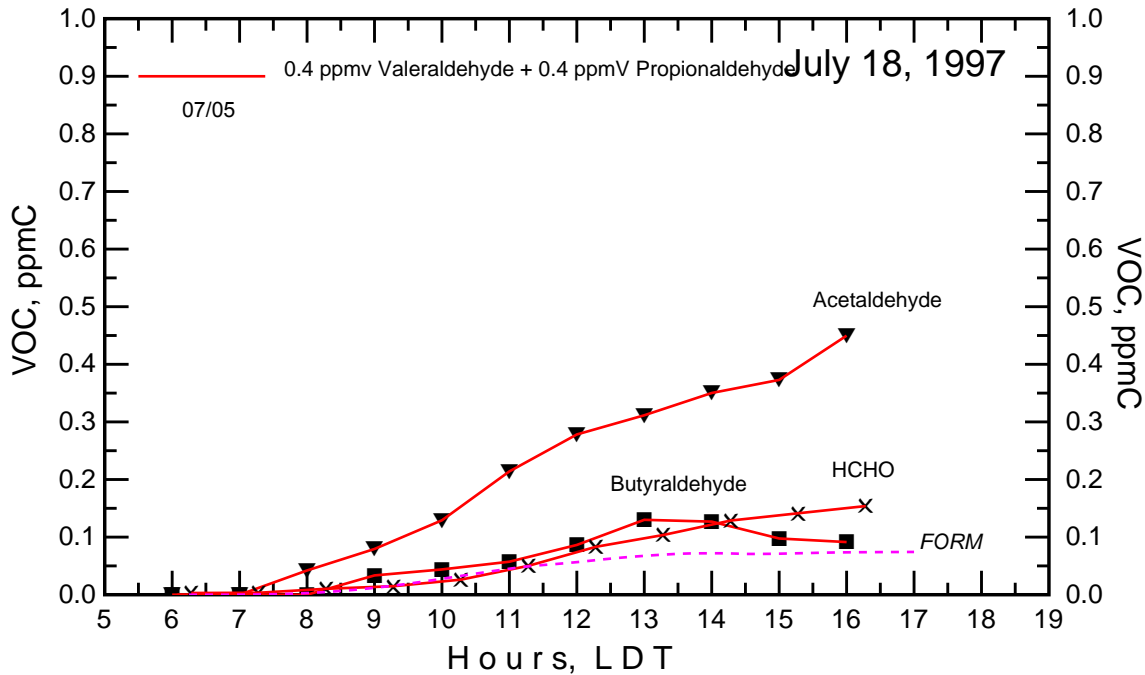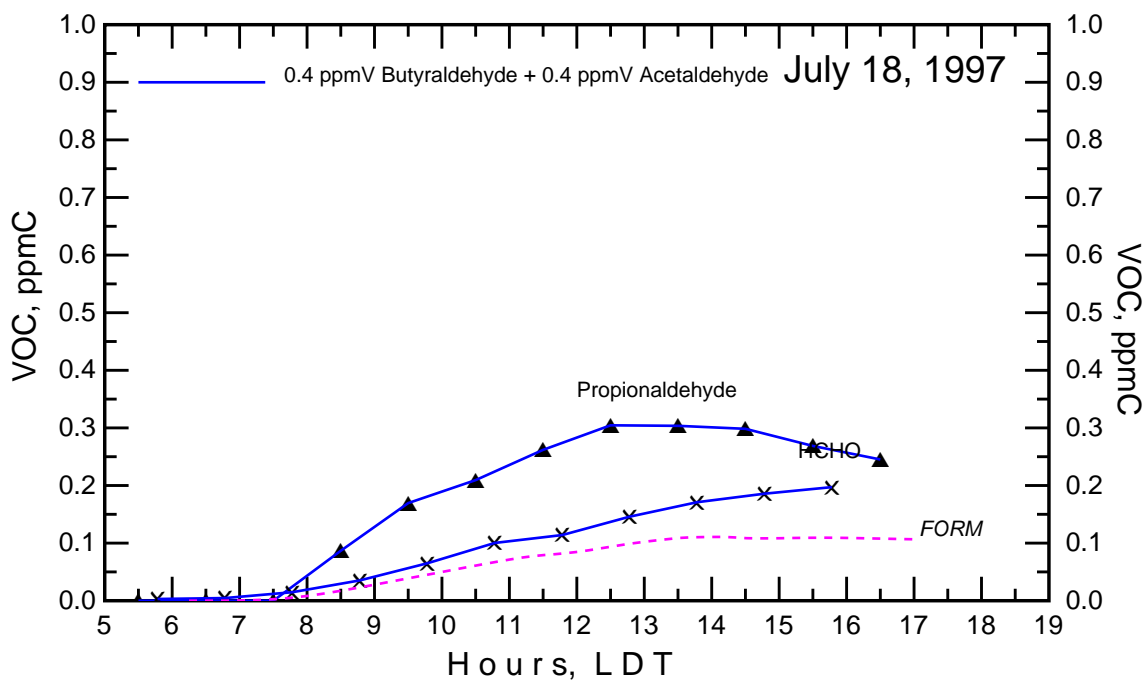

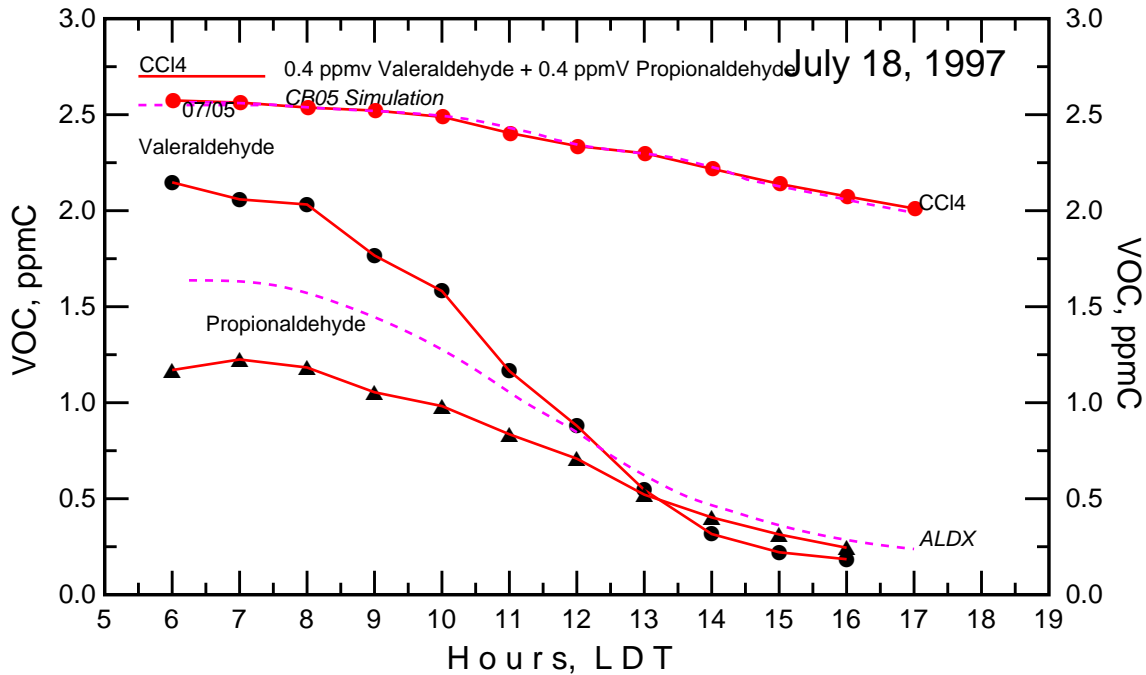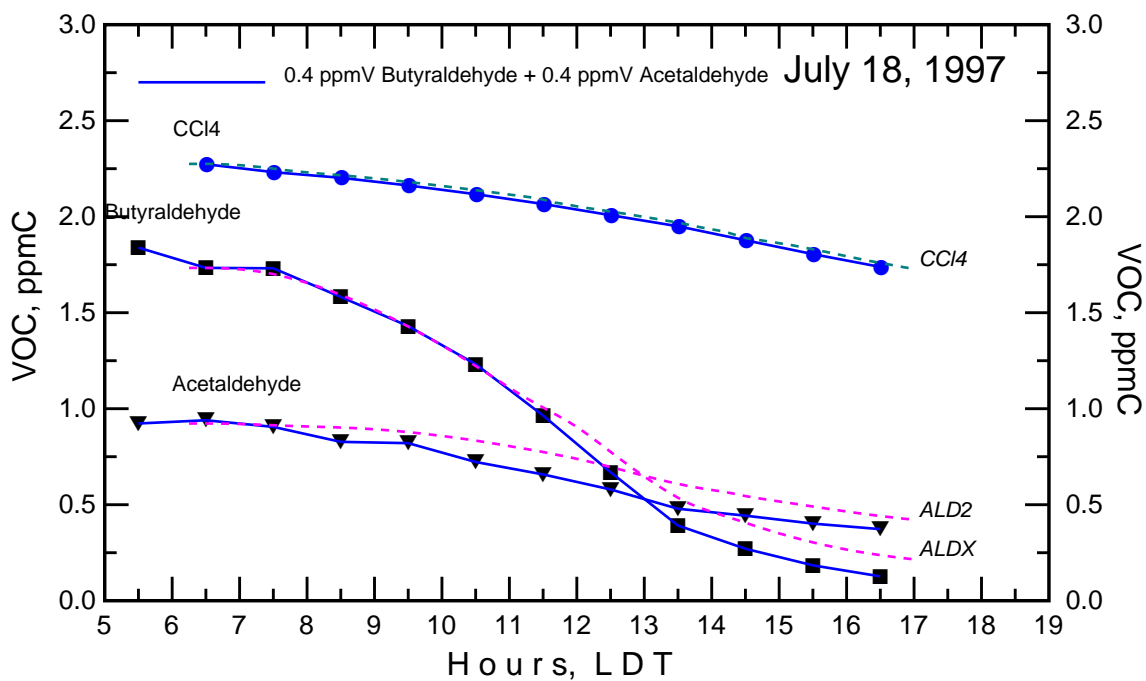

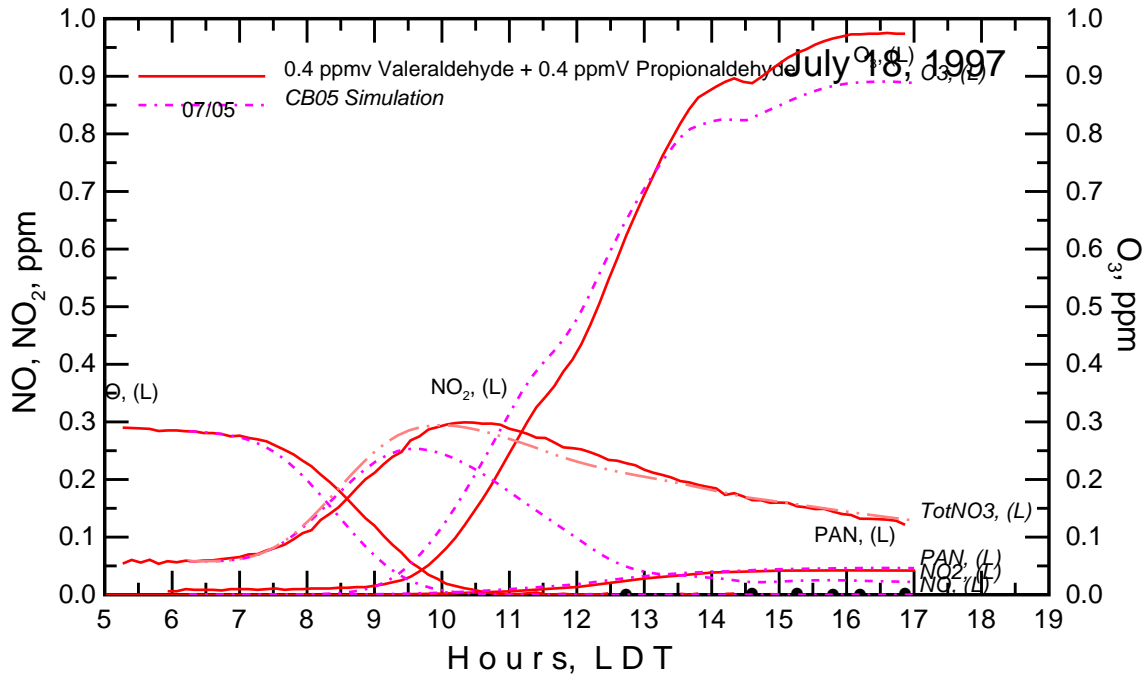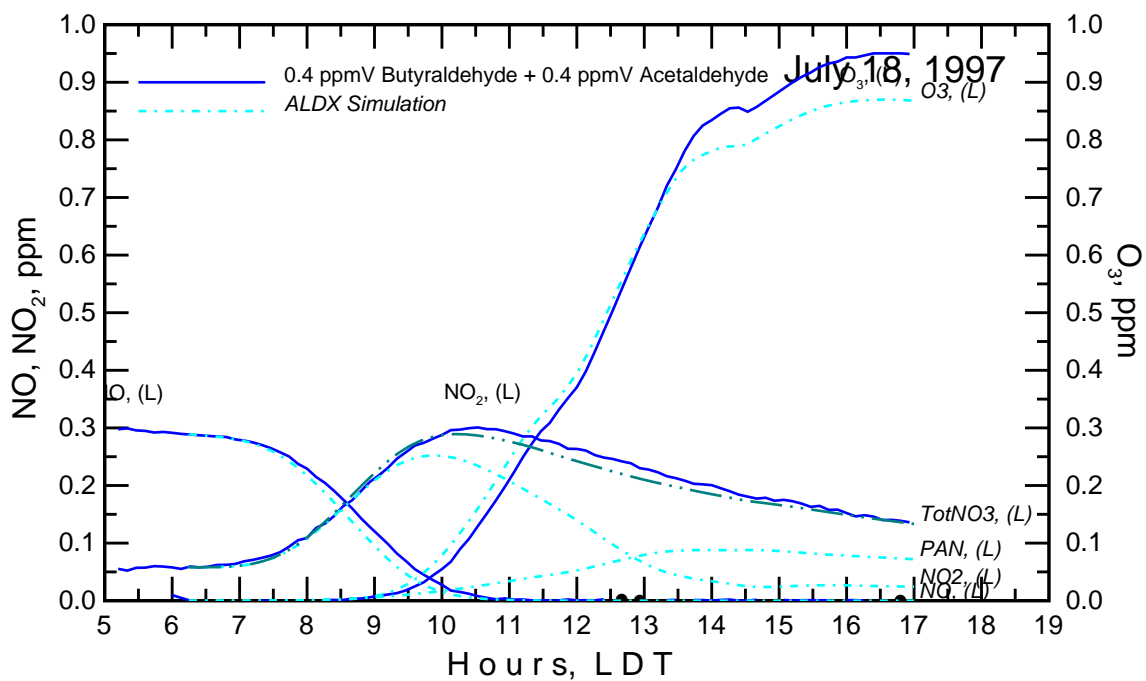

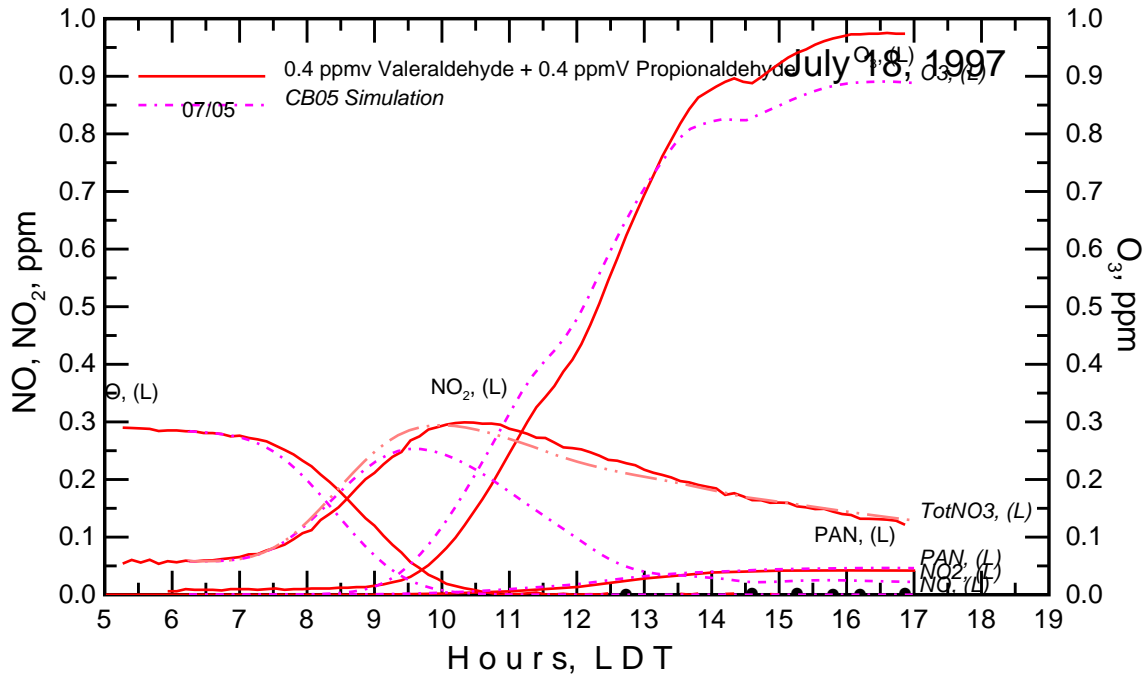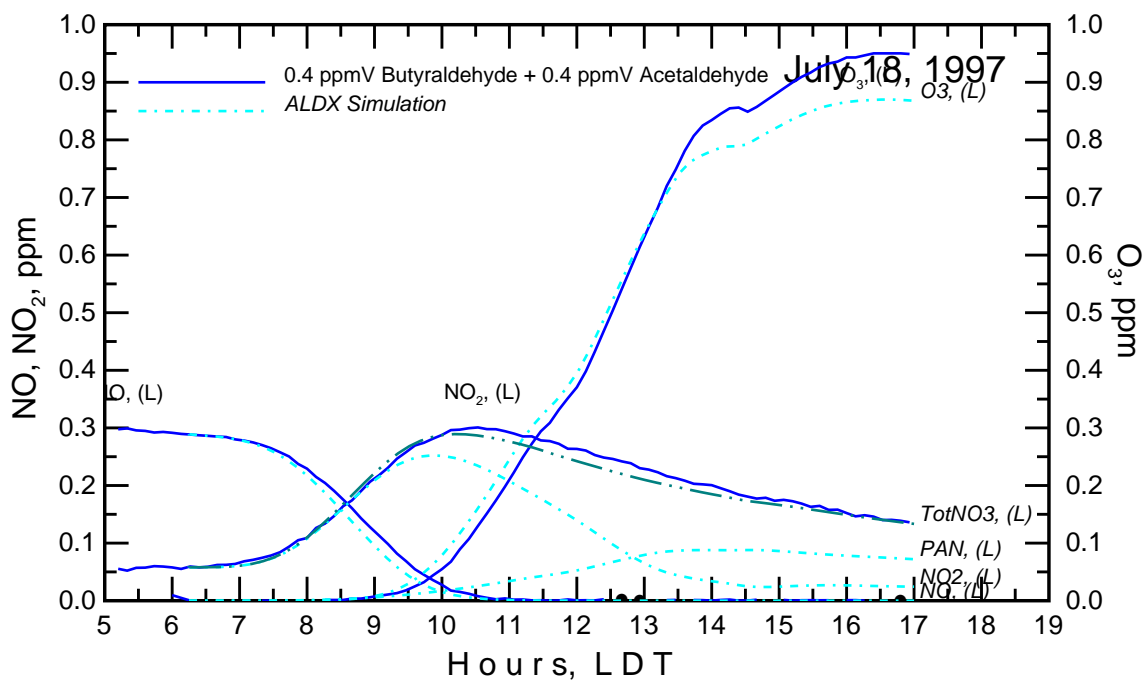

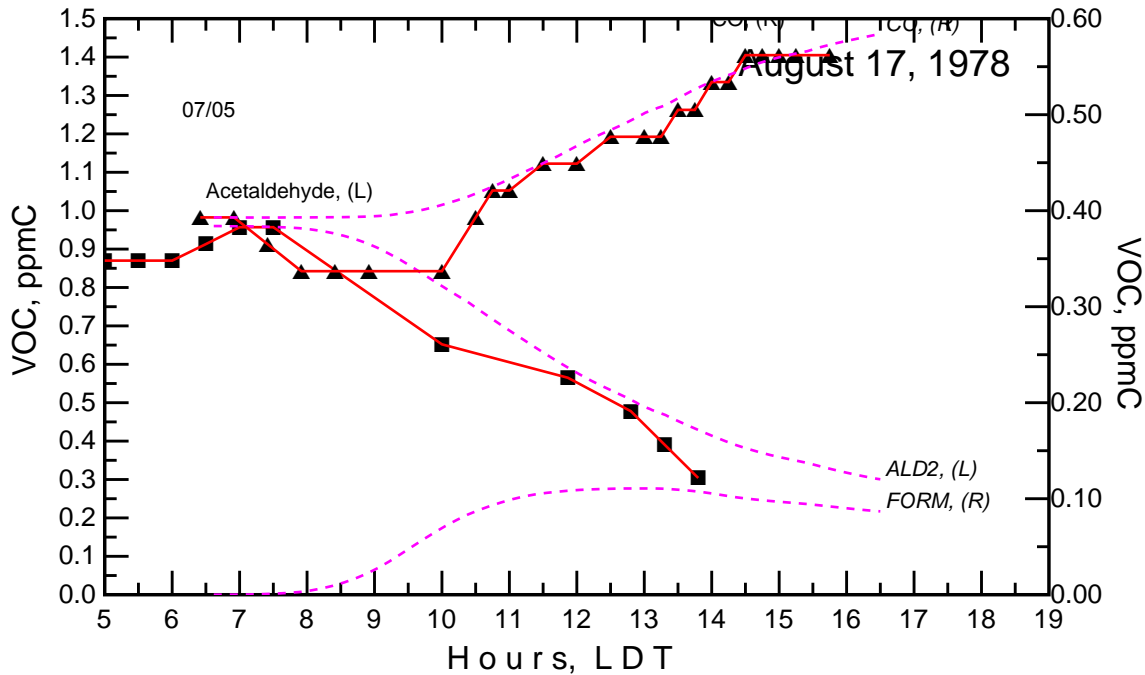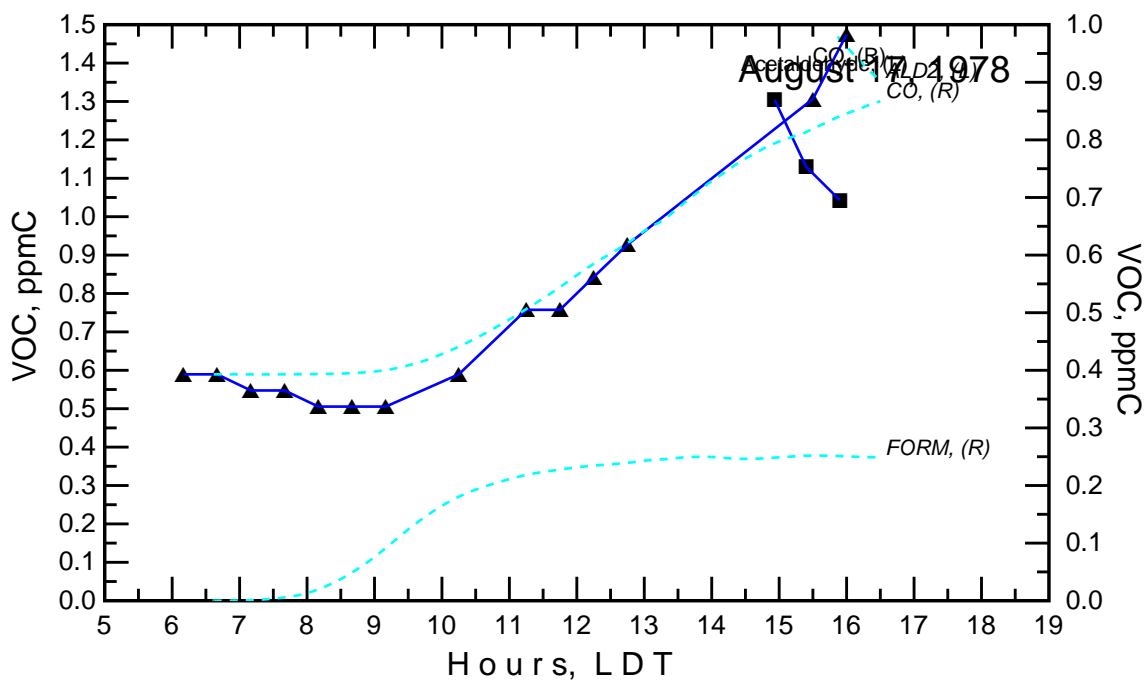

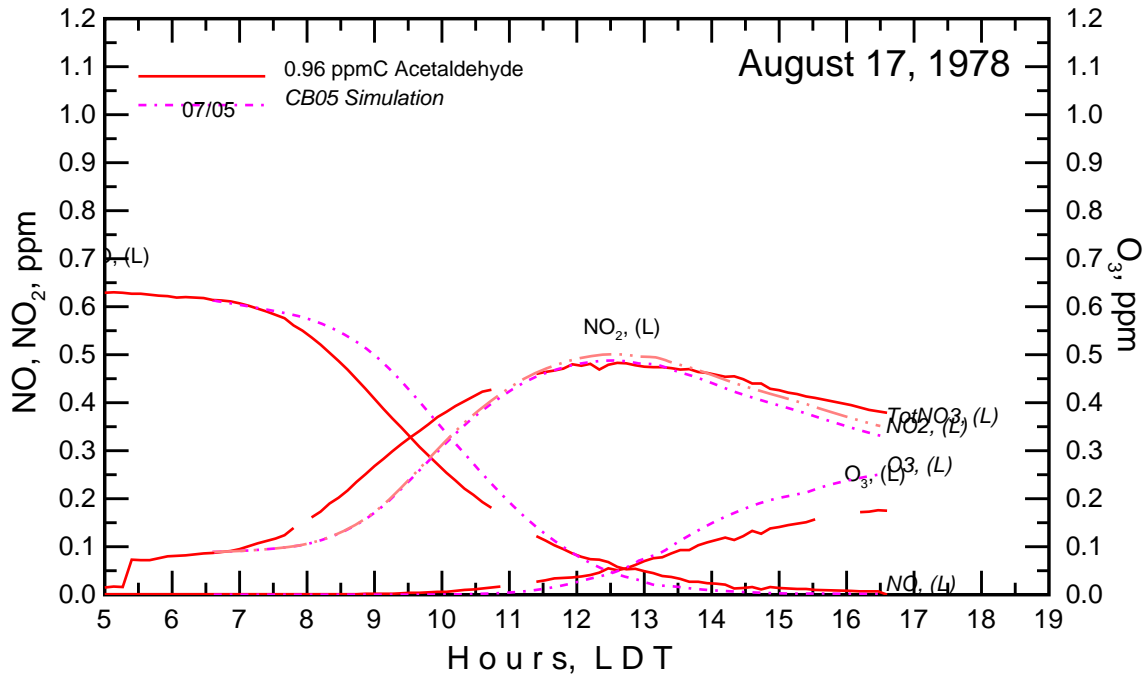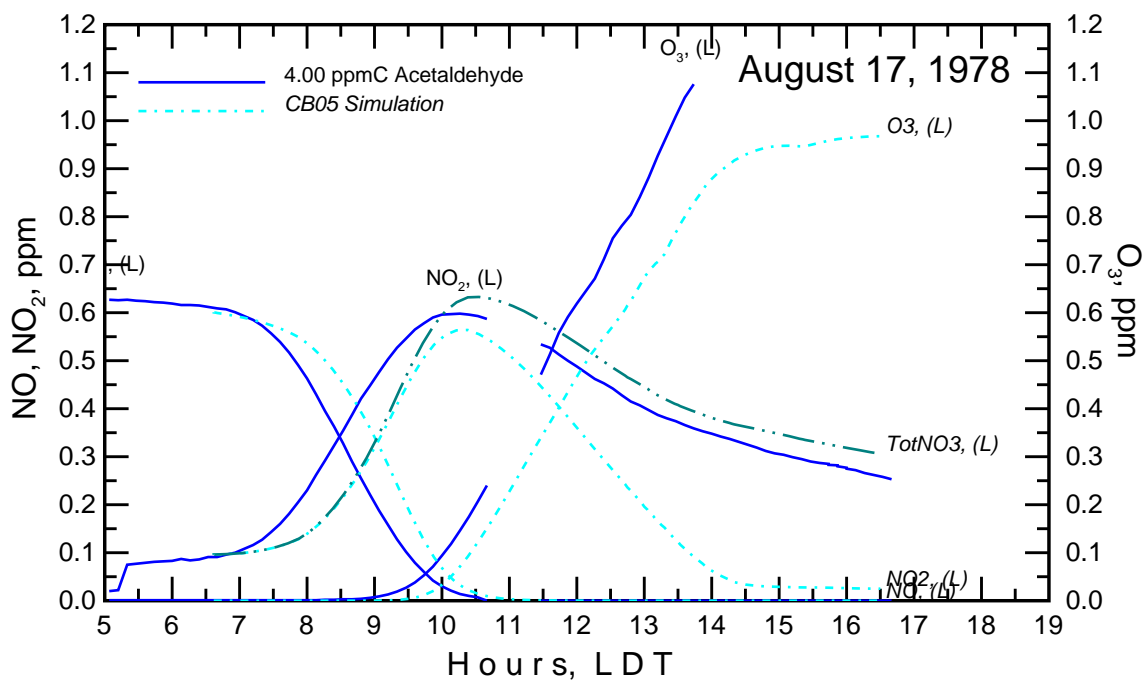

Delta HC at 0.70 ppm NO<sub>x</sub>

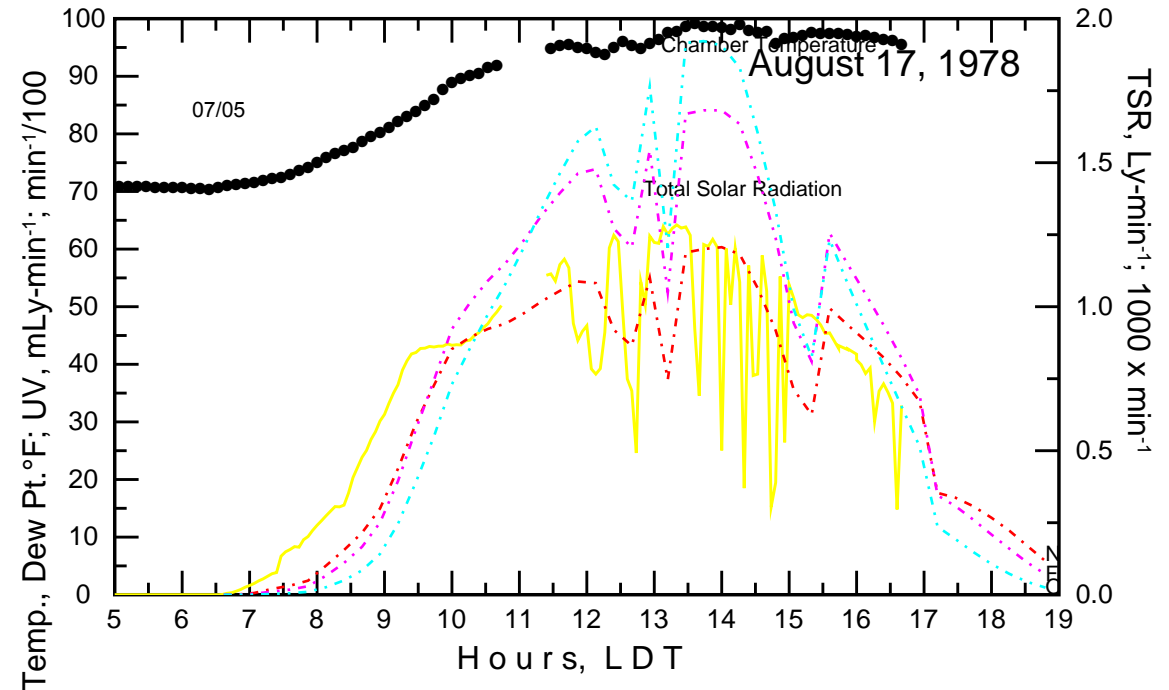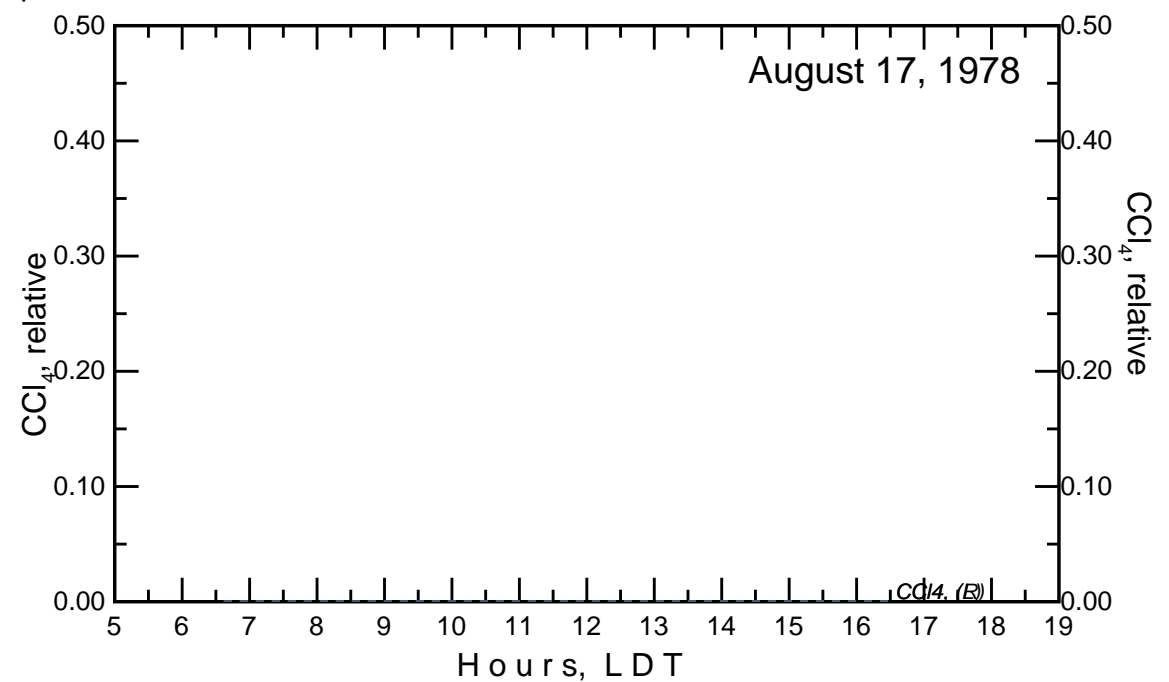

### **Higher Aldehydes (ALDX)**

JL 03 97

AU 12 97

ST 04 97

OC 04 96

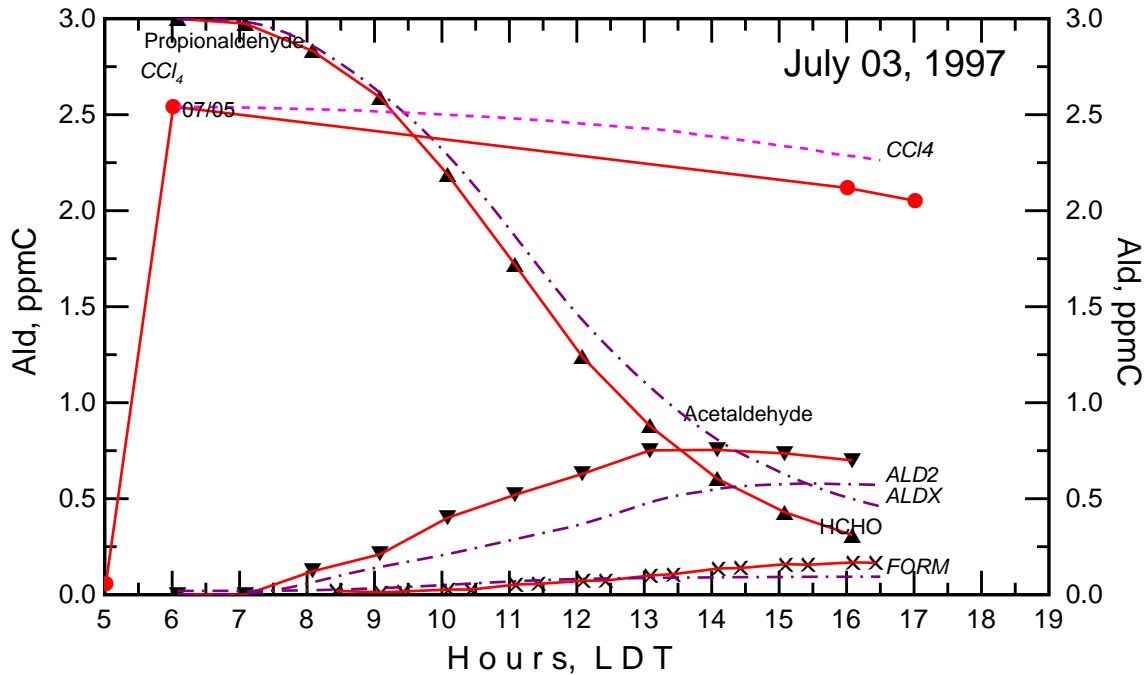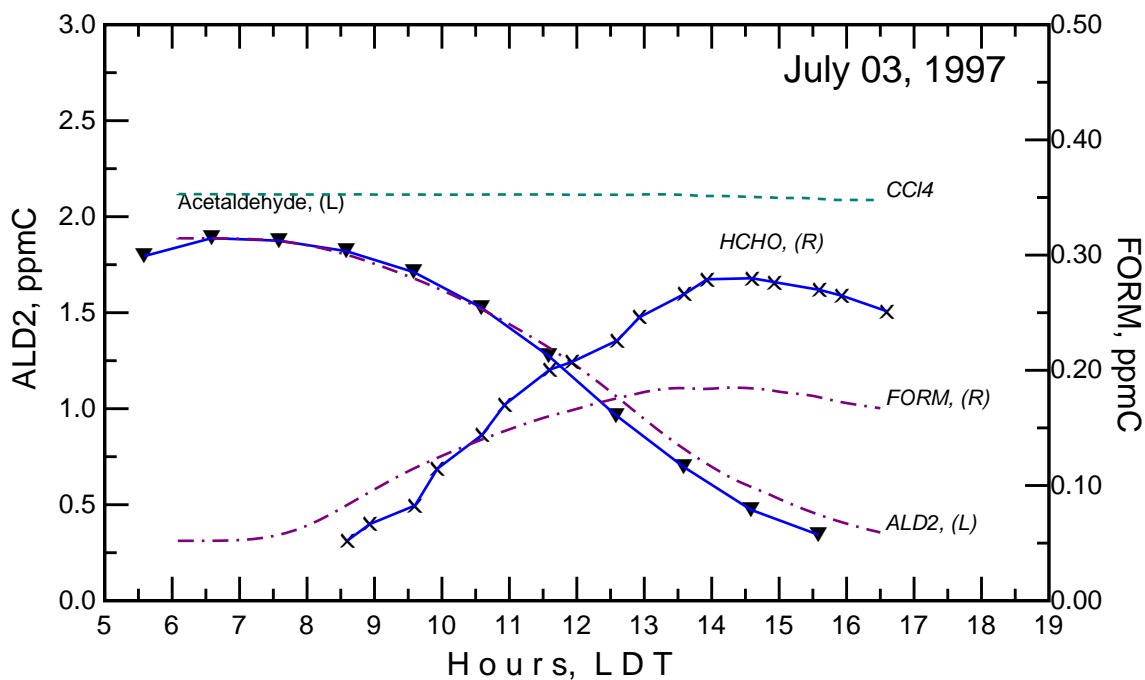

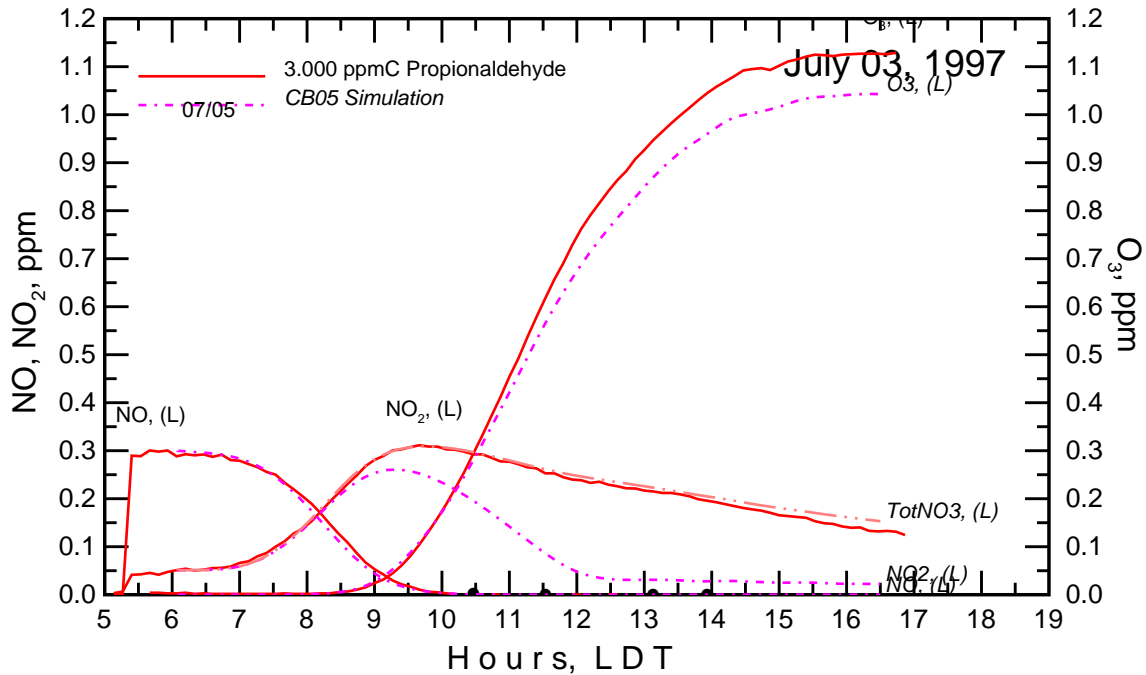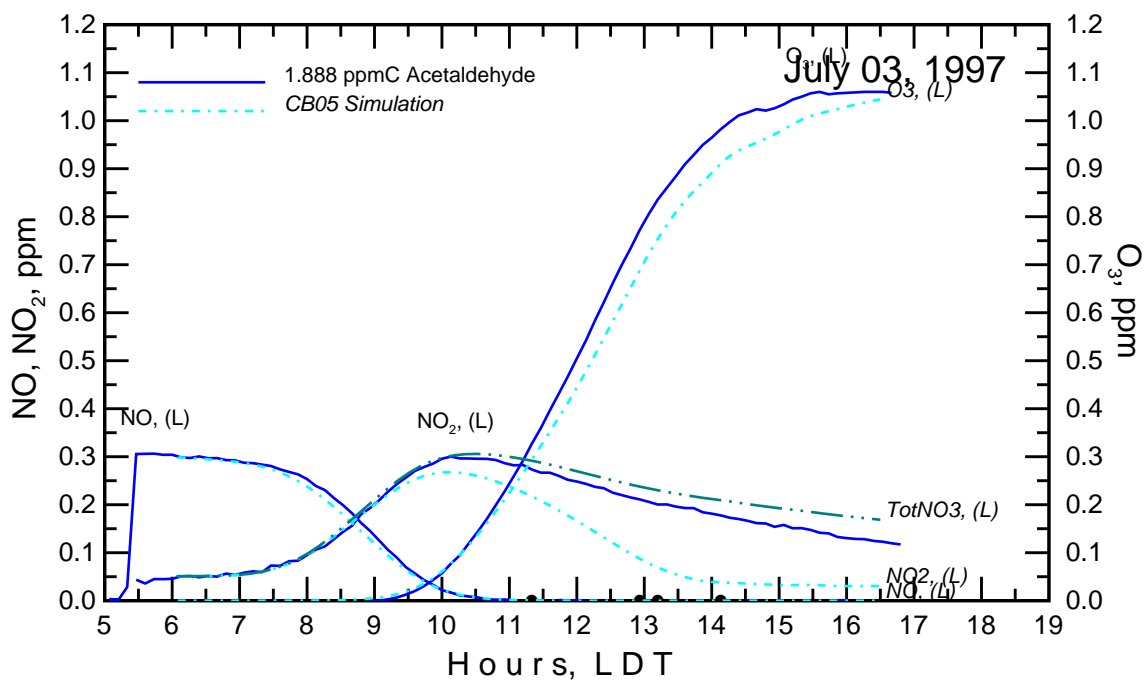

Acetaldehyde vs Propionaldehyde

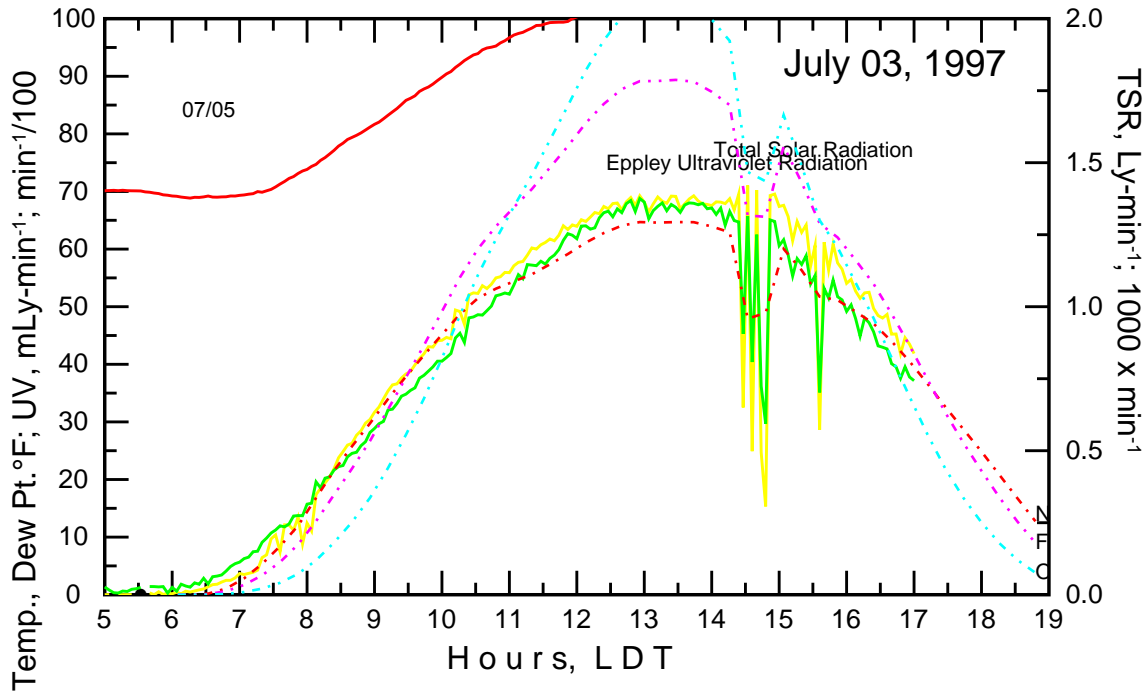

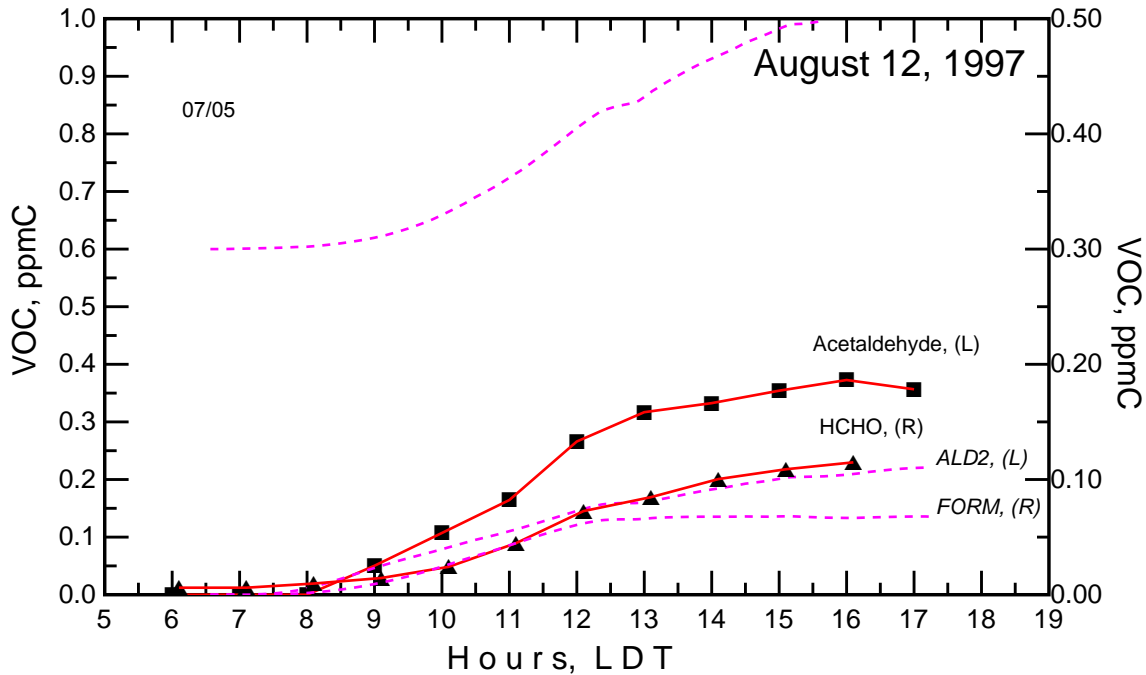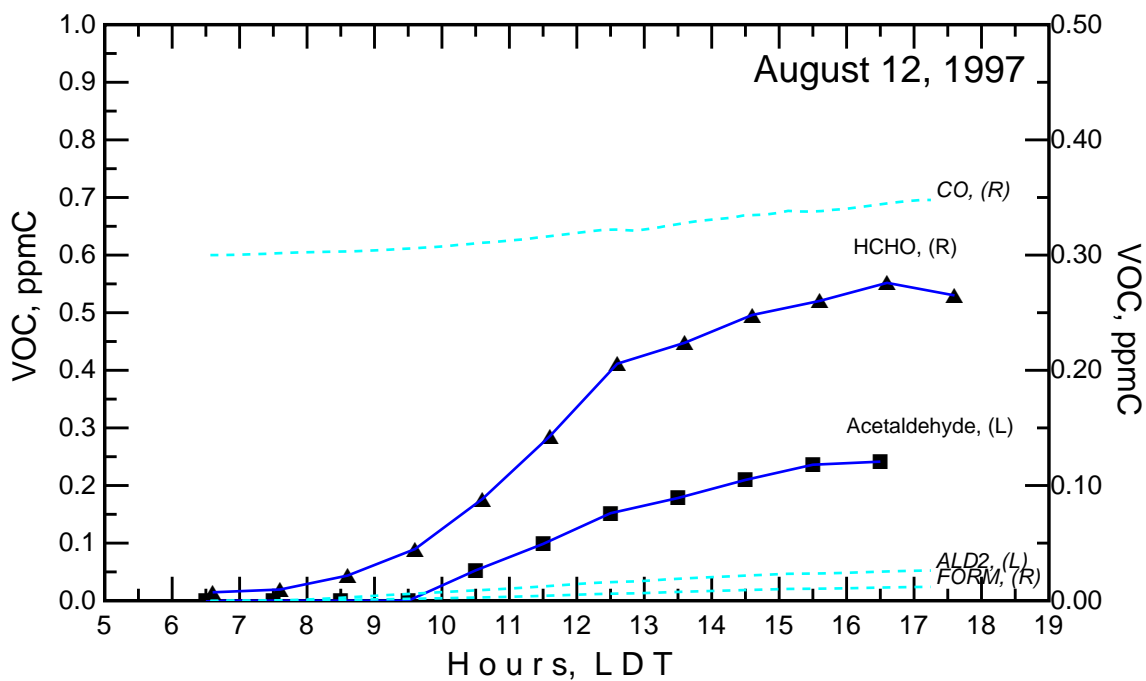

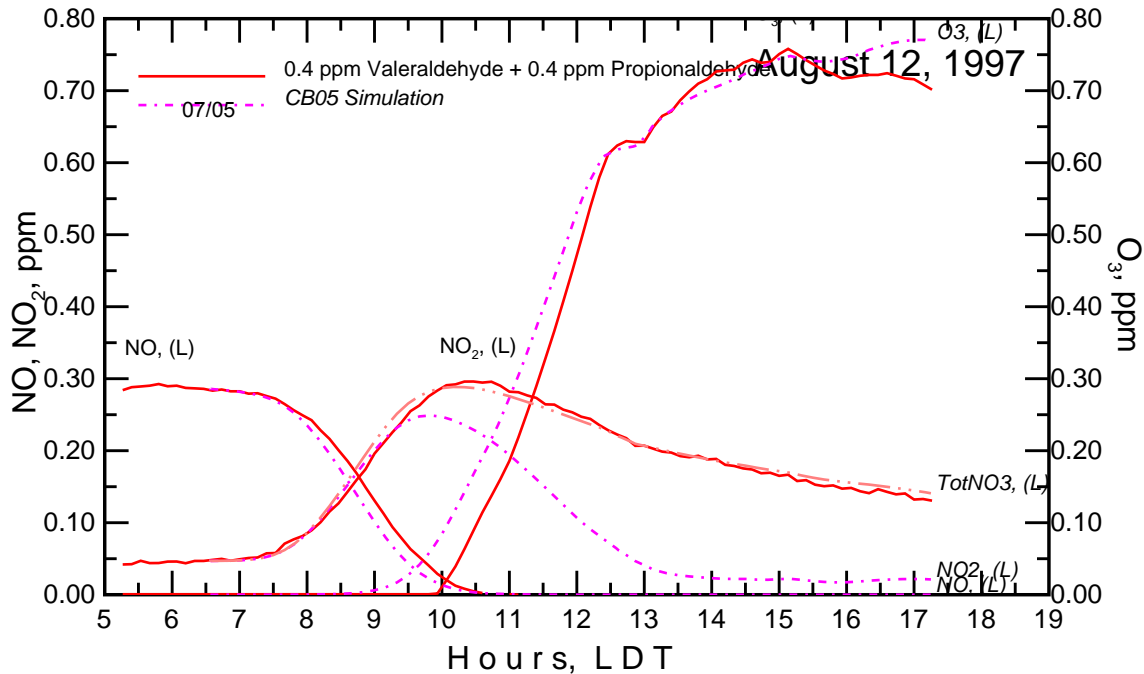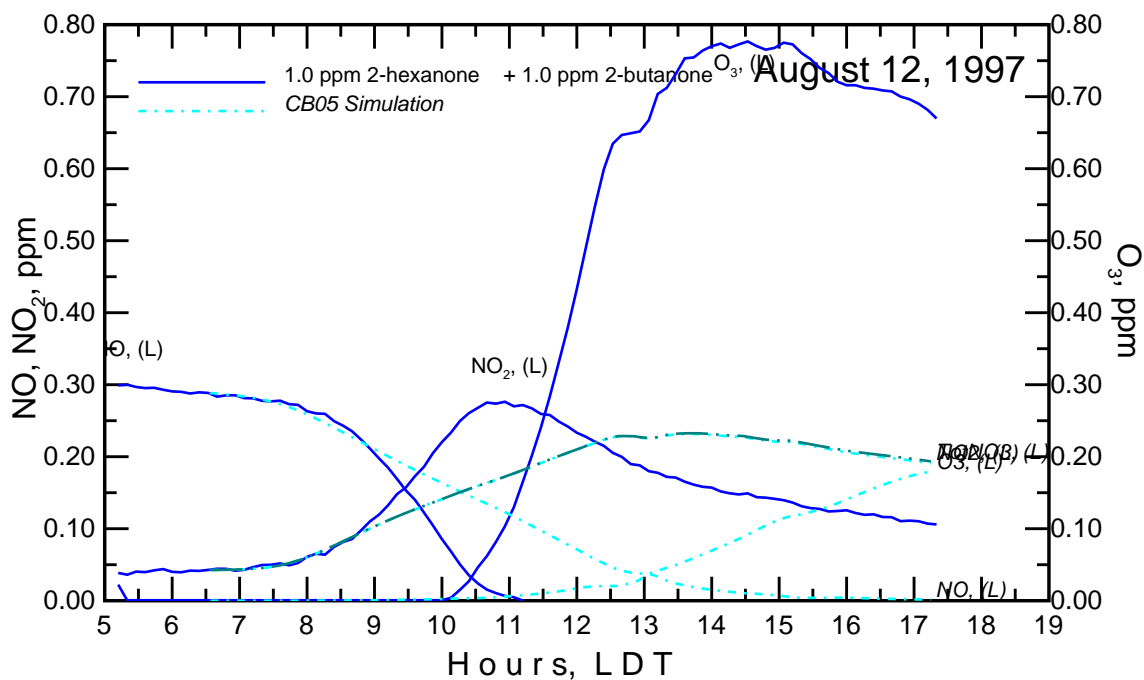

Aldehydes Mix vs Ketones Mix

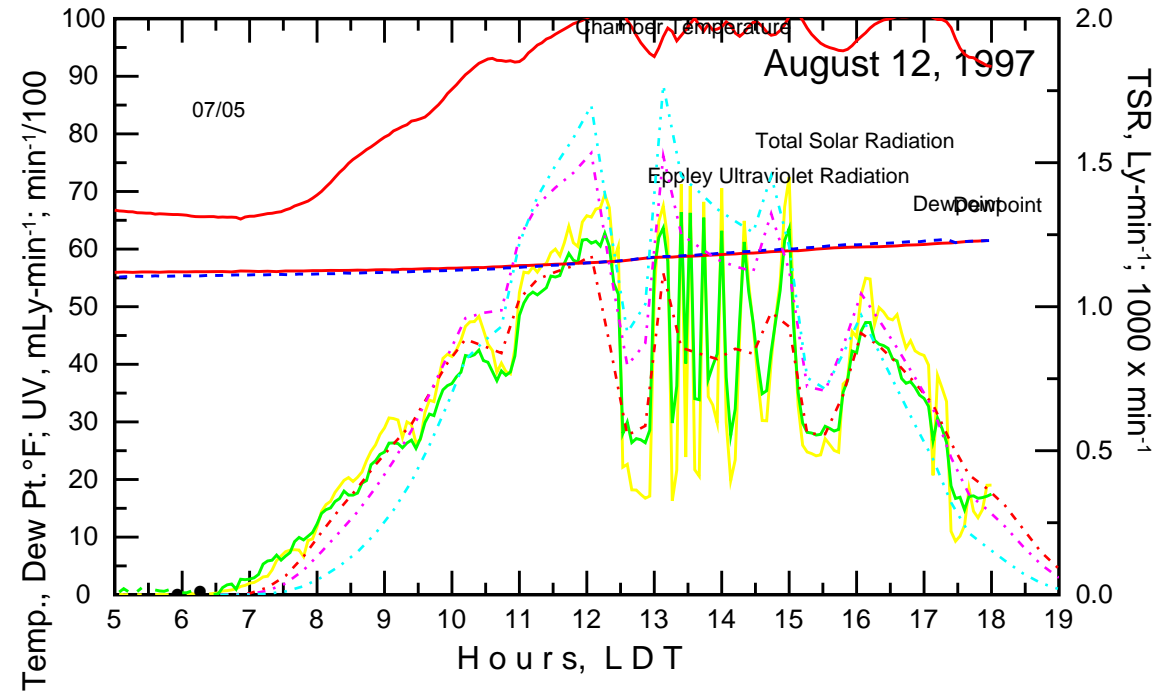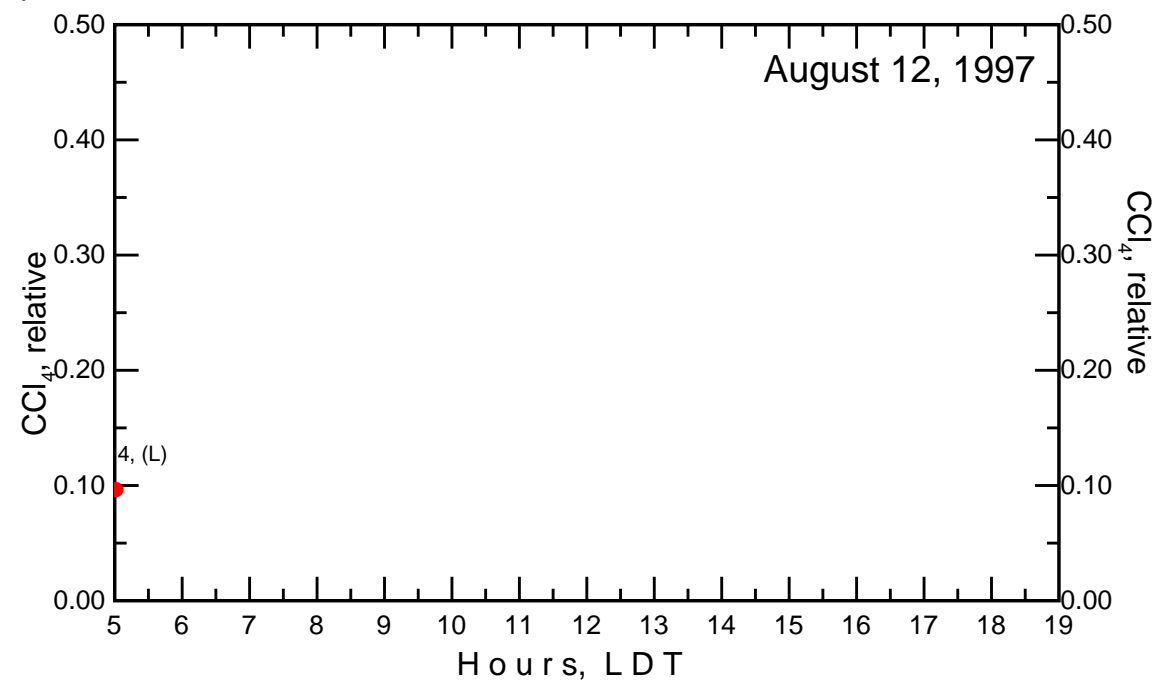

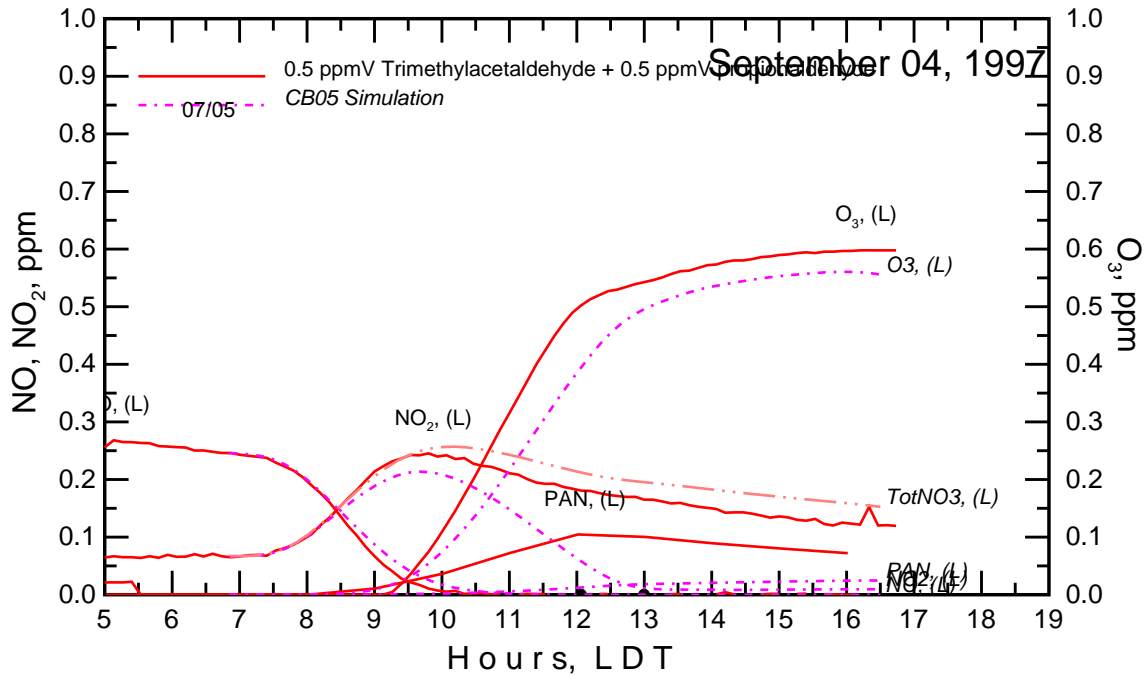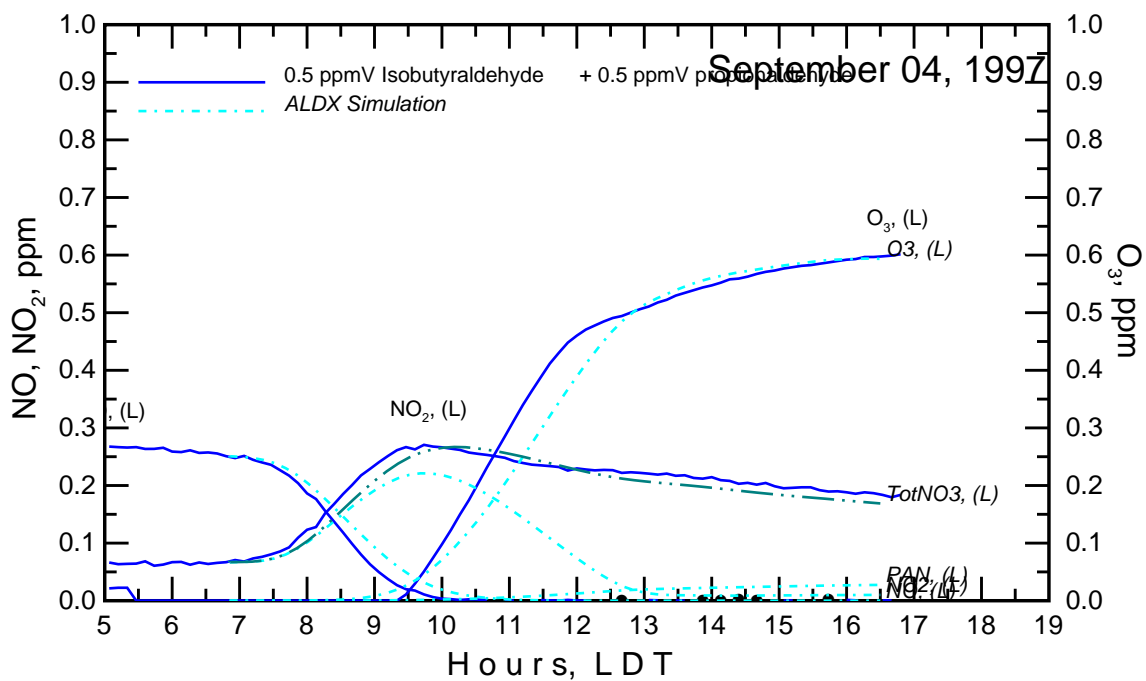

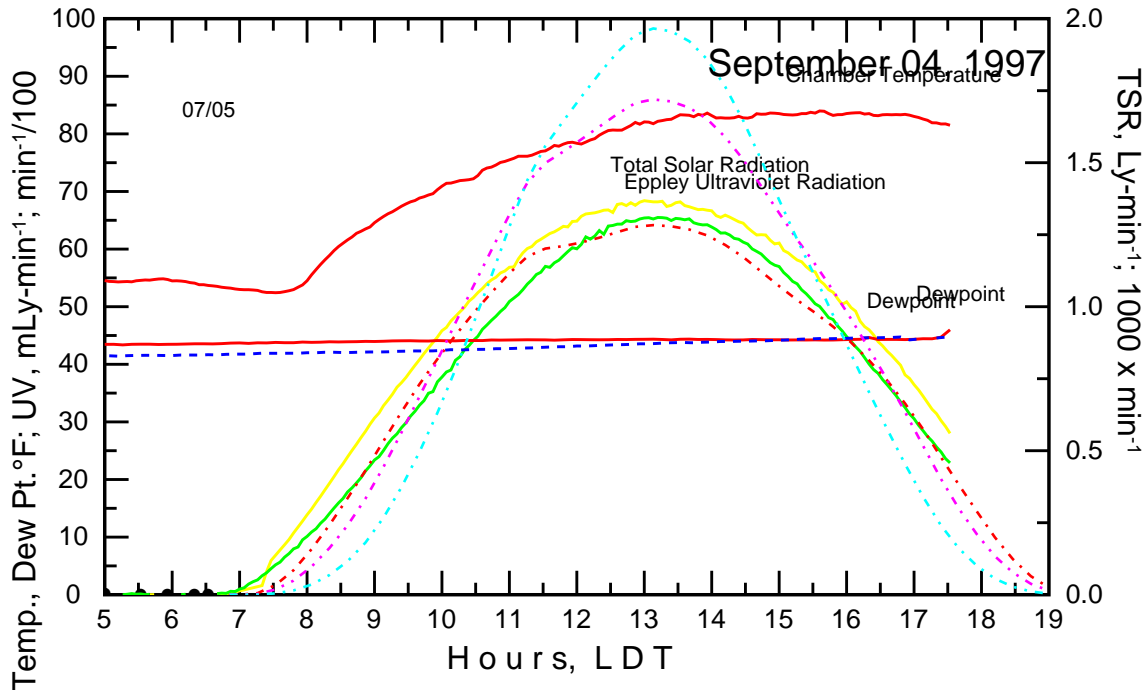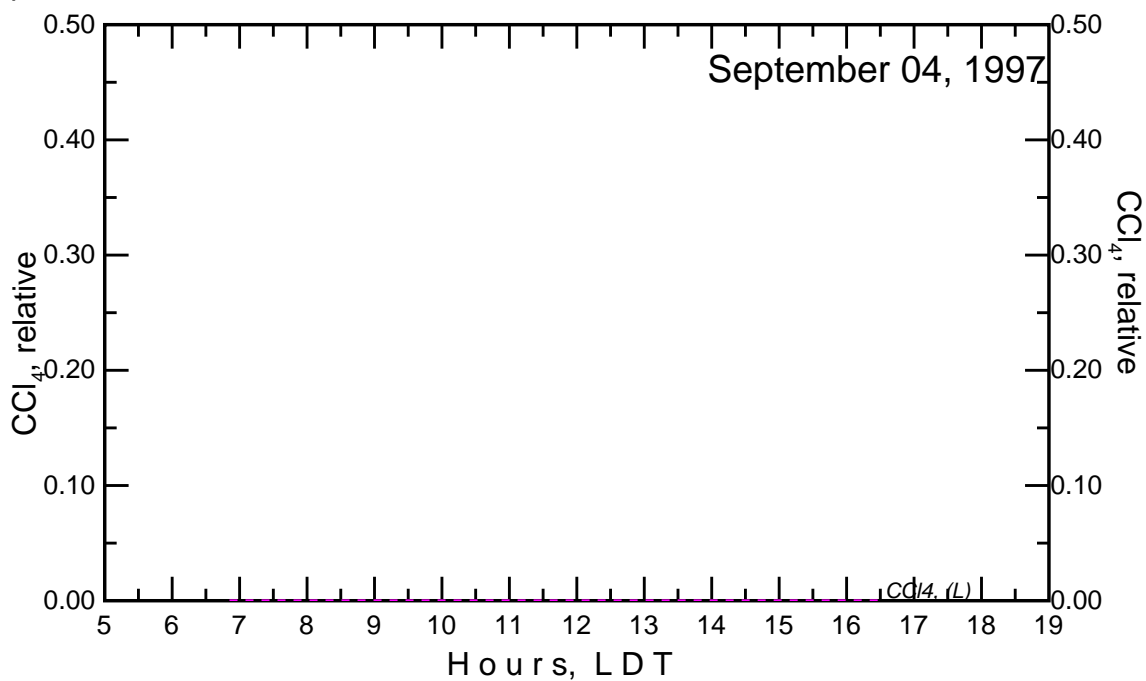

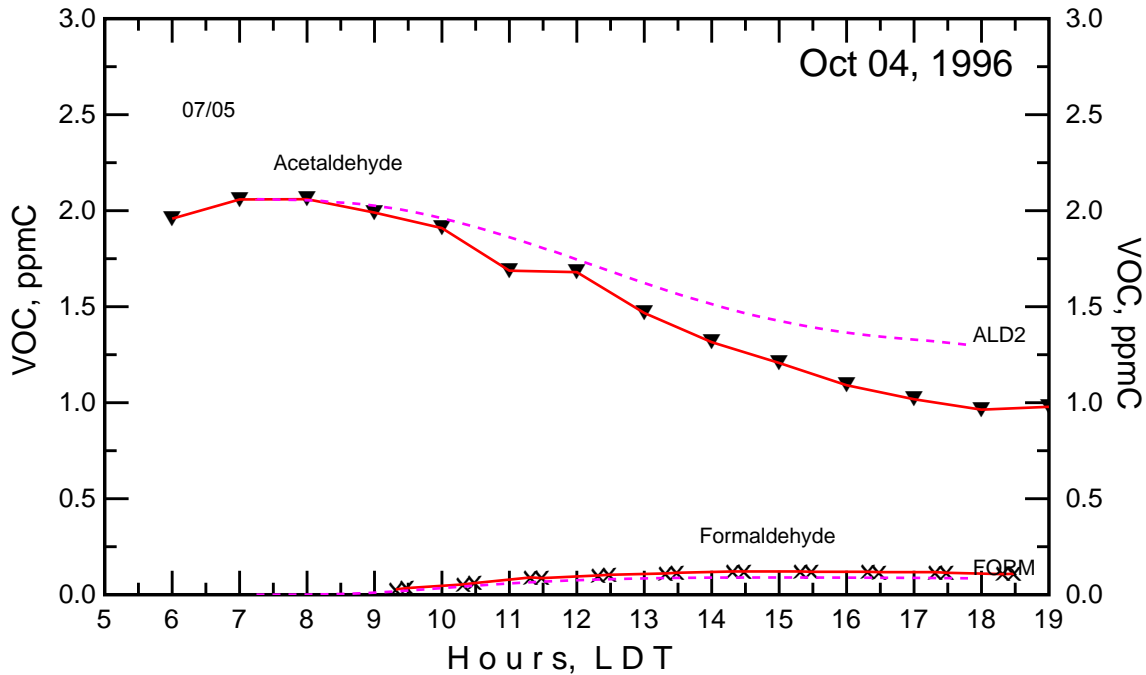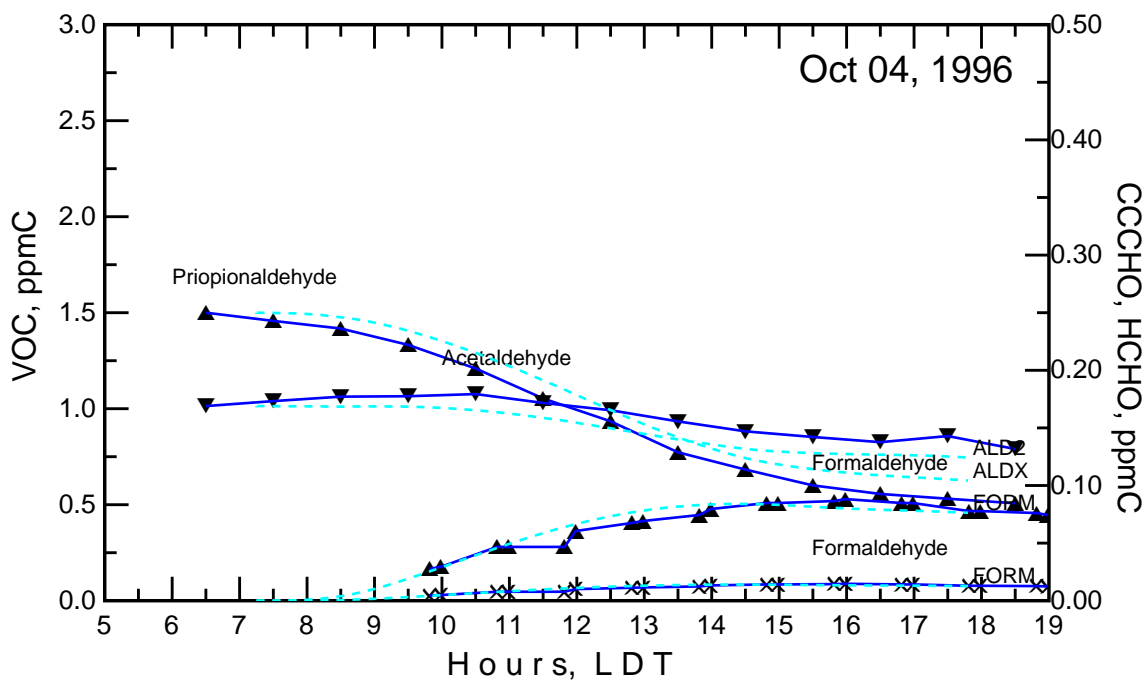

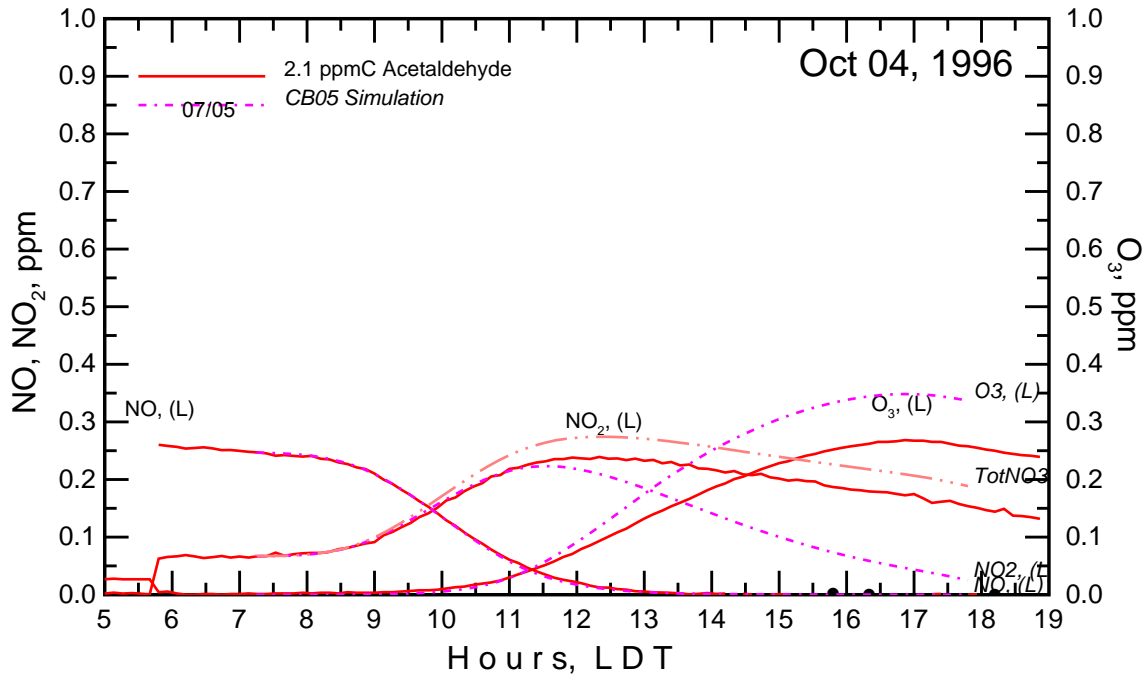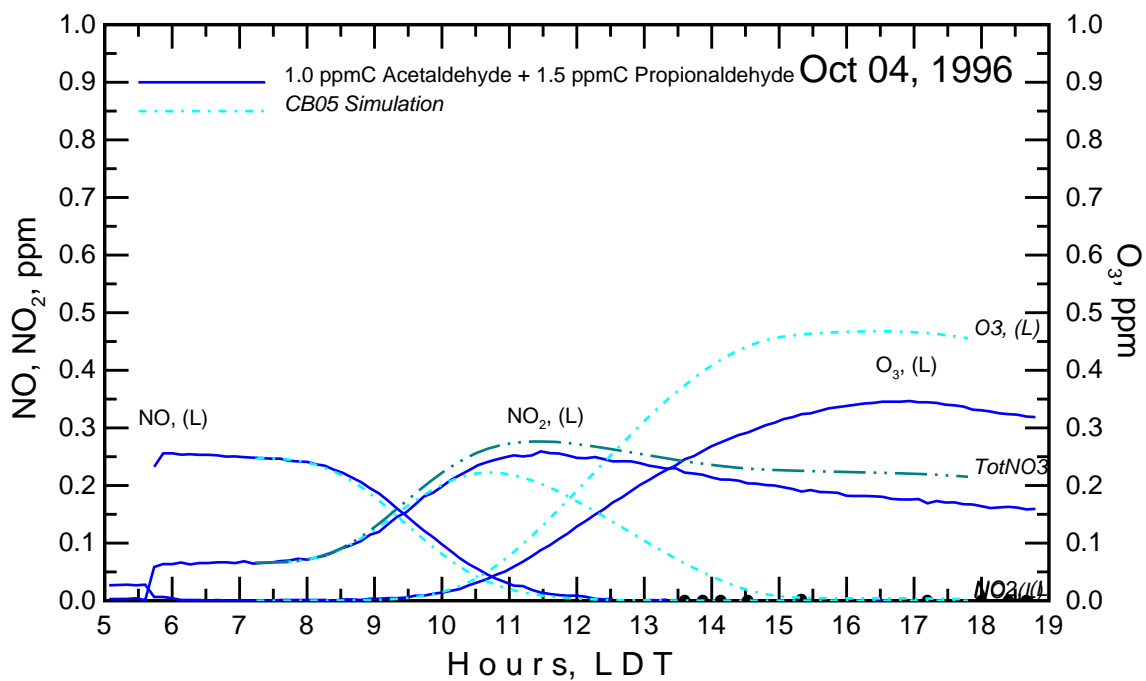

1 ppm Acetaldehyde vs 0.5 ppm Acetaldehyde and 0.5 ppm Propionaldehyde<sup>65</sup>

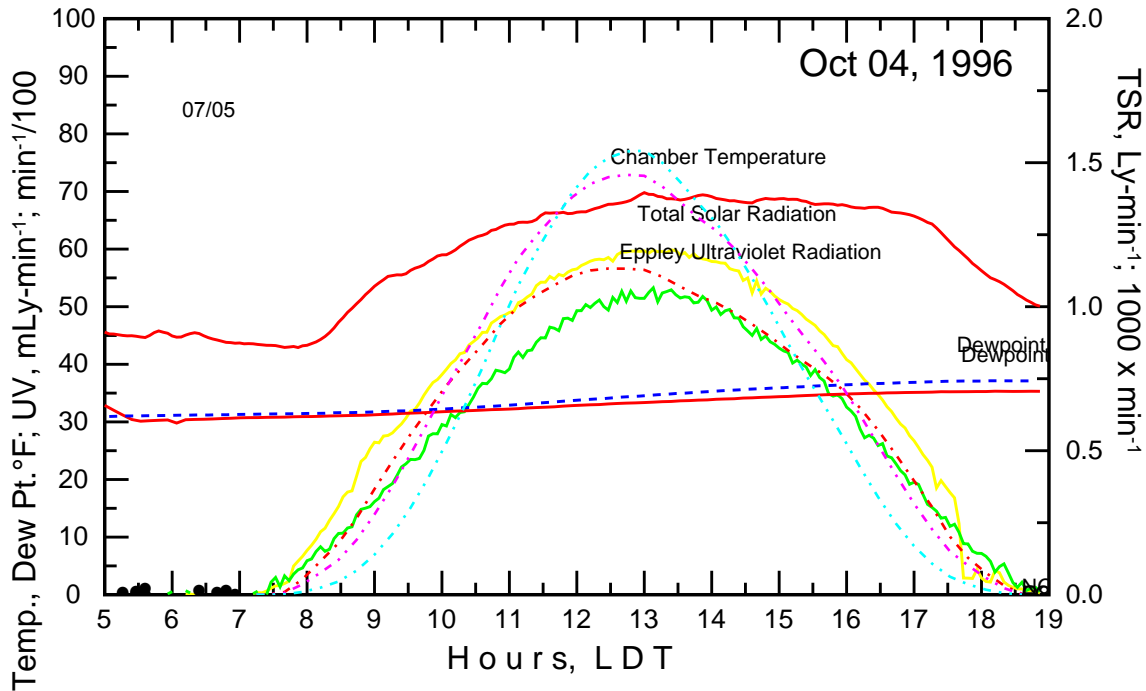

## **Ethene (ETH)**

AU 16 88

Au 24 97

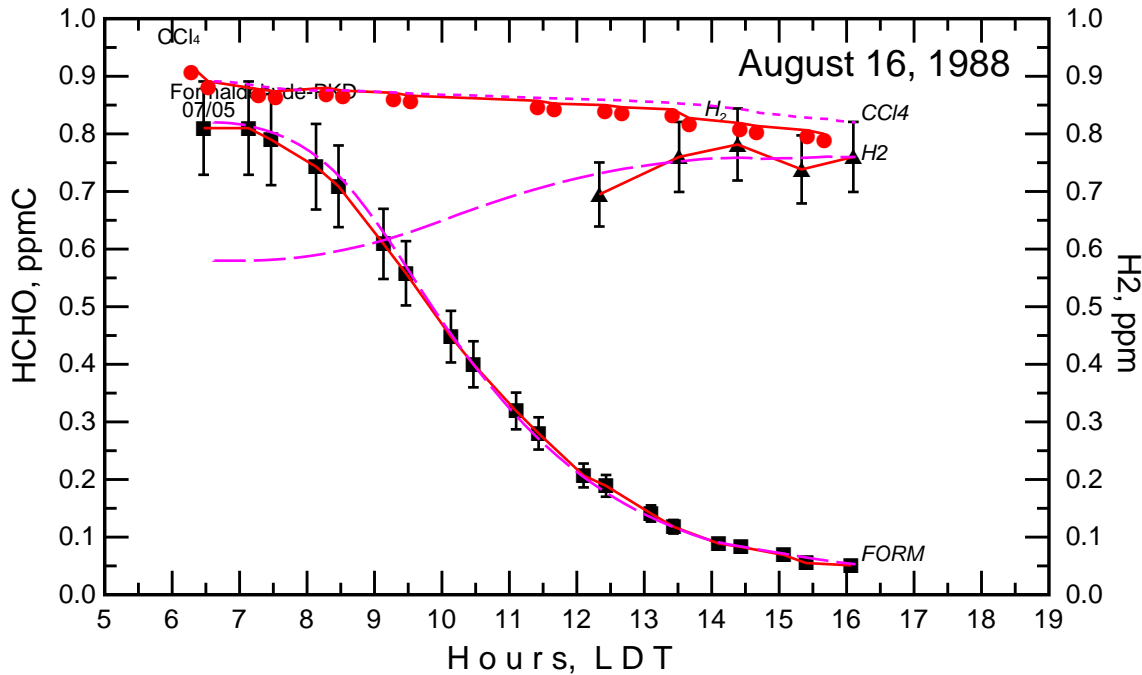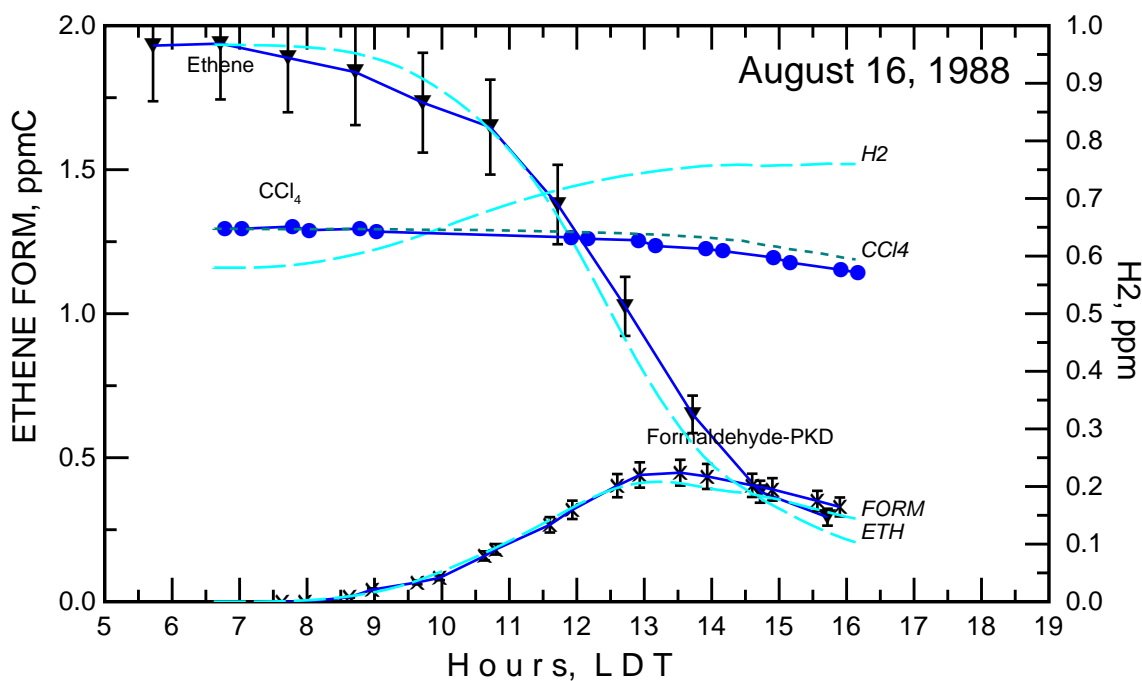



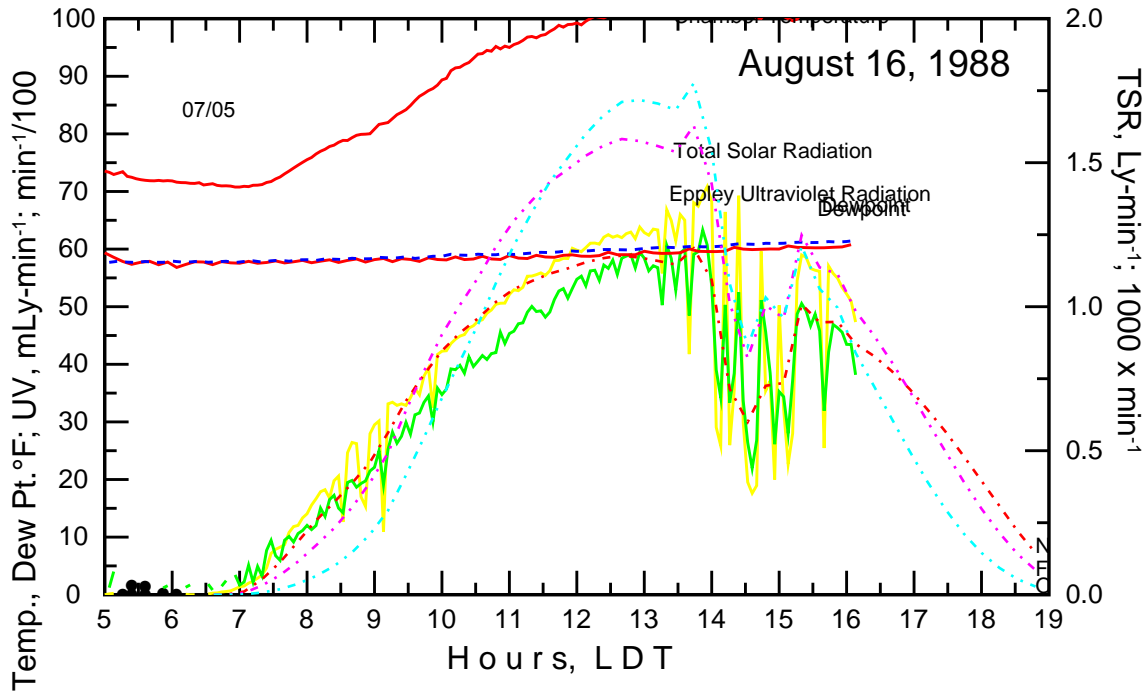

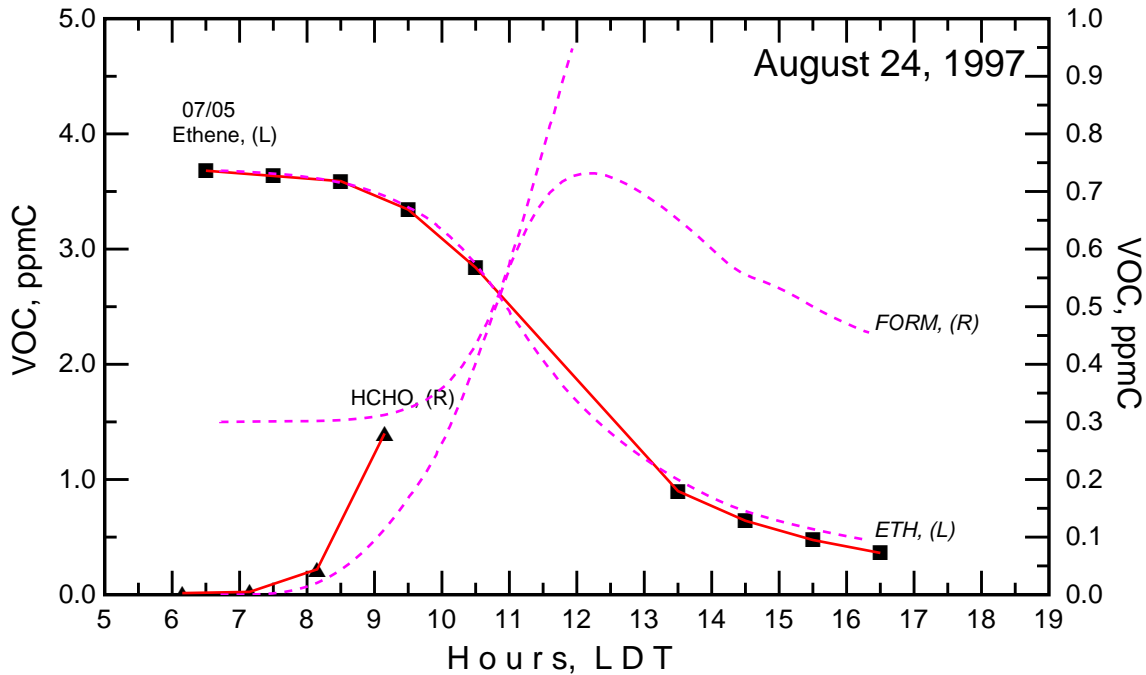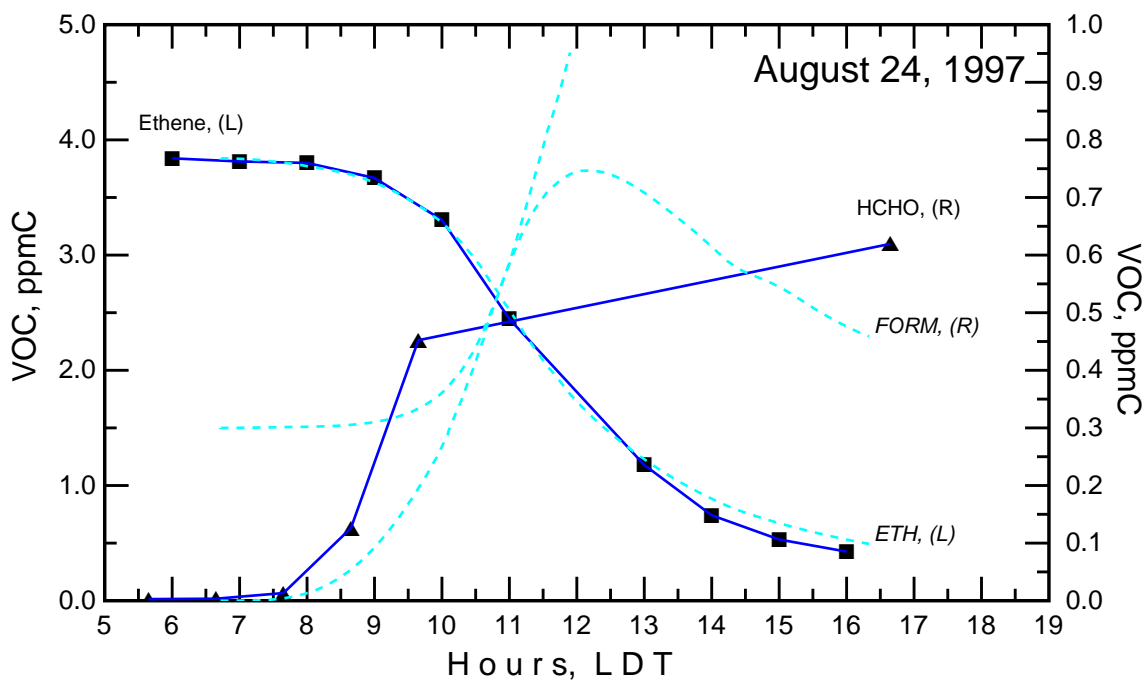

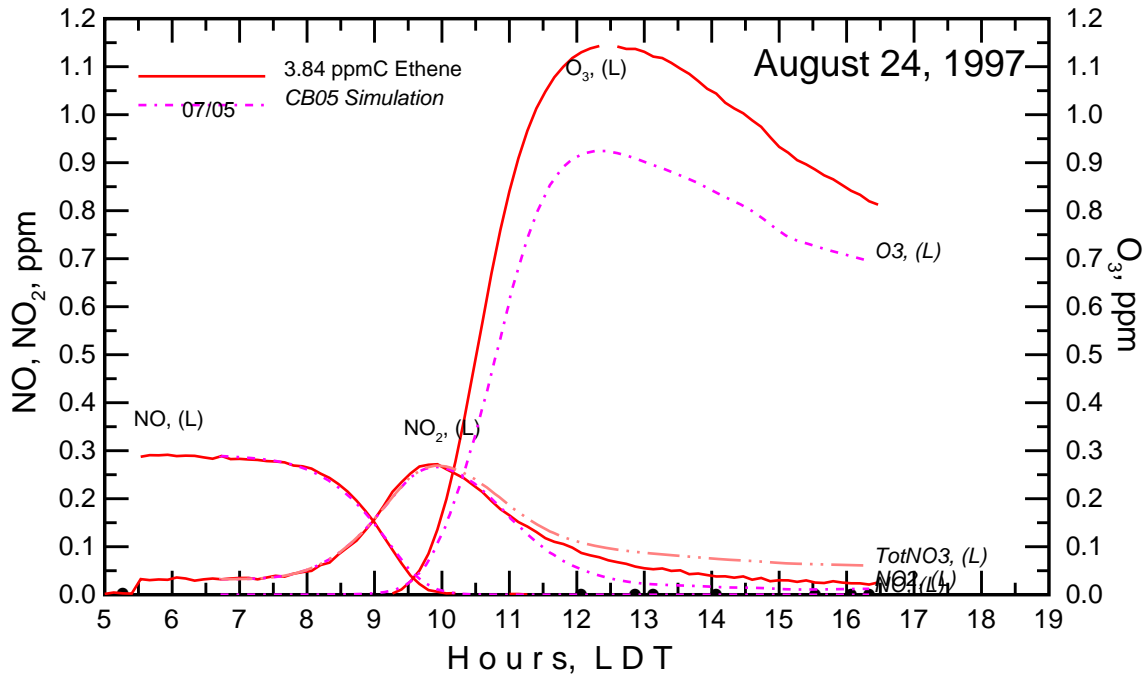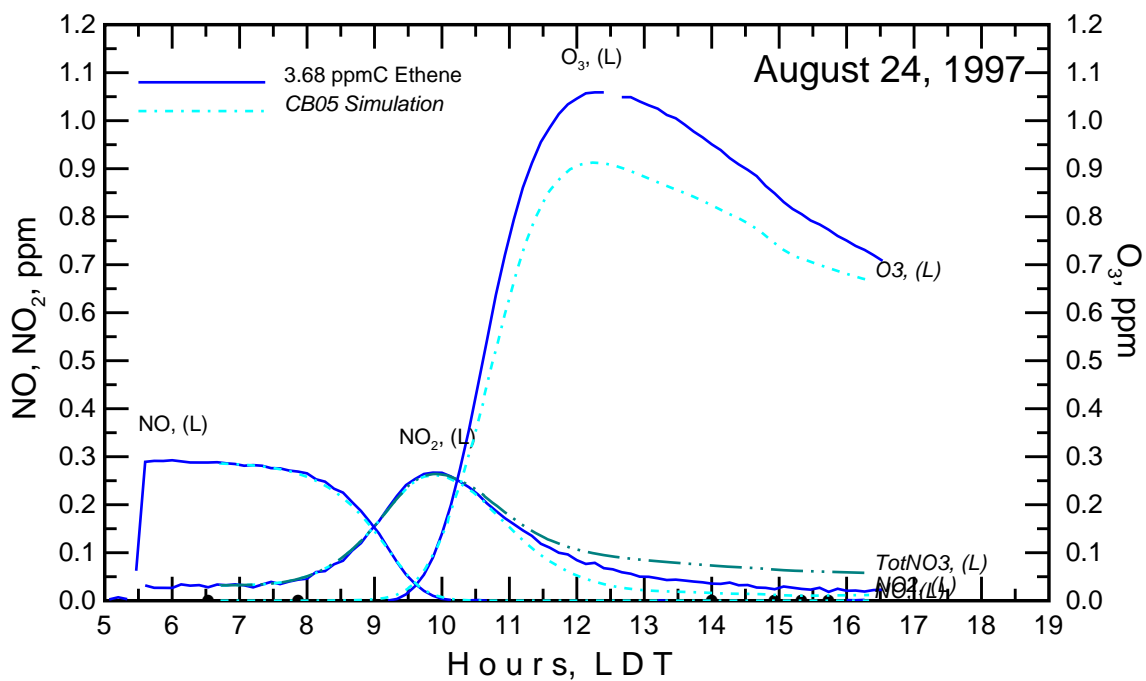

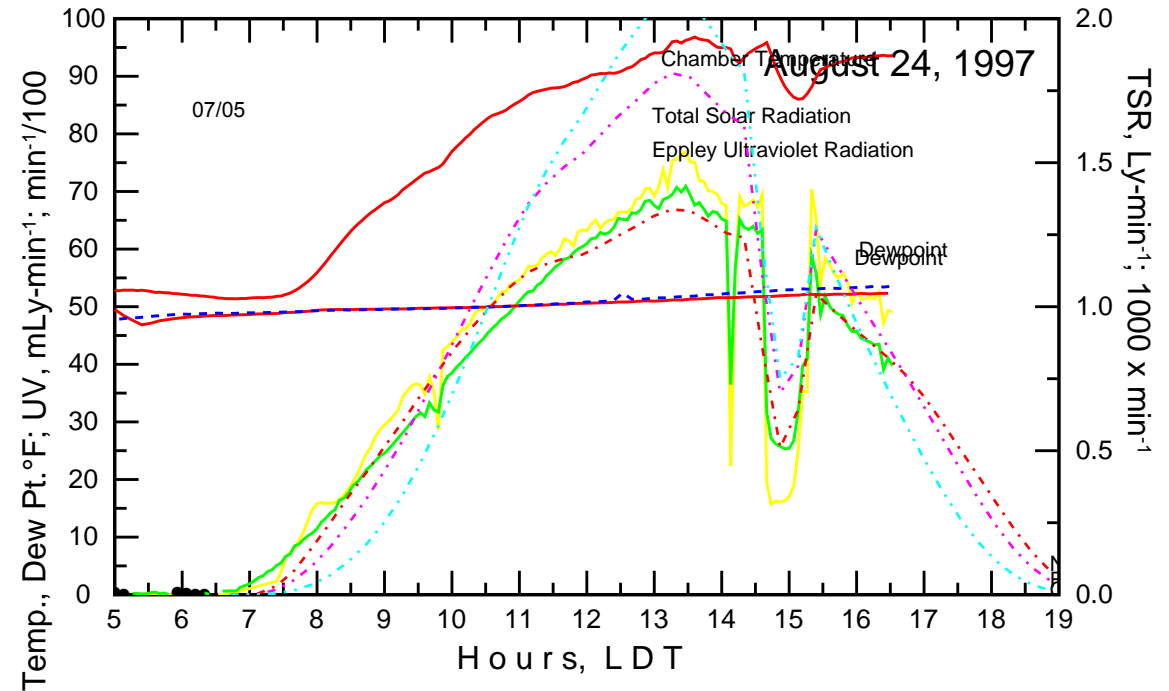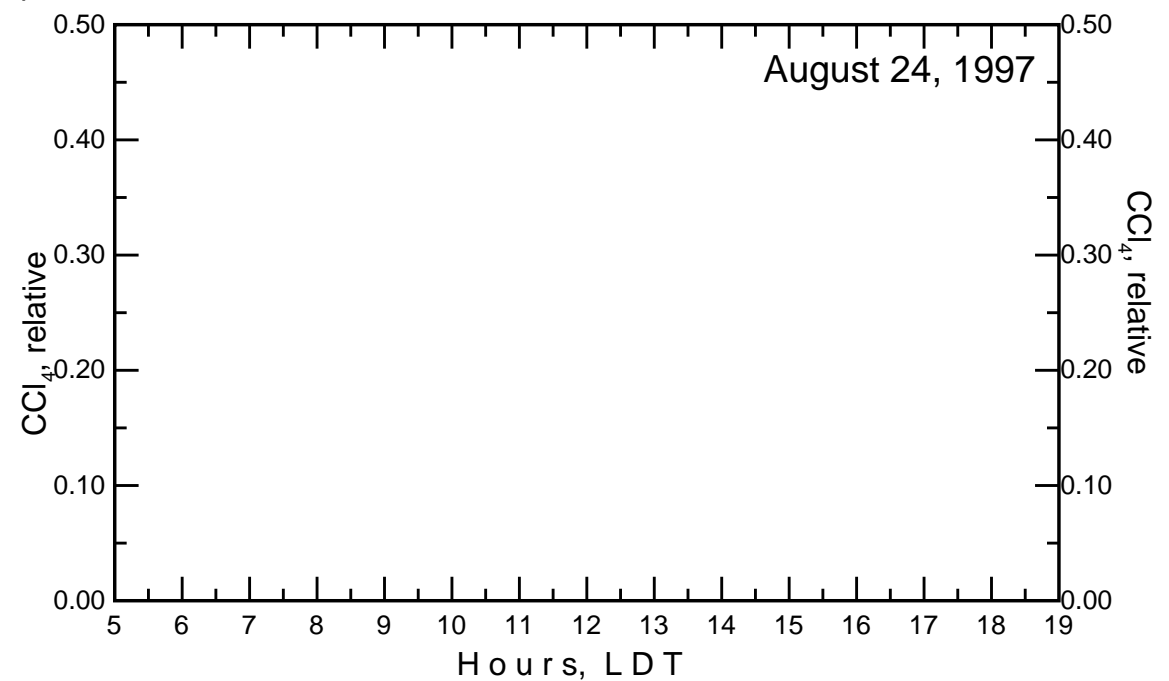

## **Terminal Olefins (OLE)**

JN 23 92  
ST 19 95

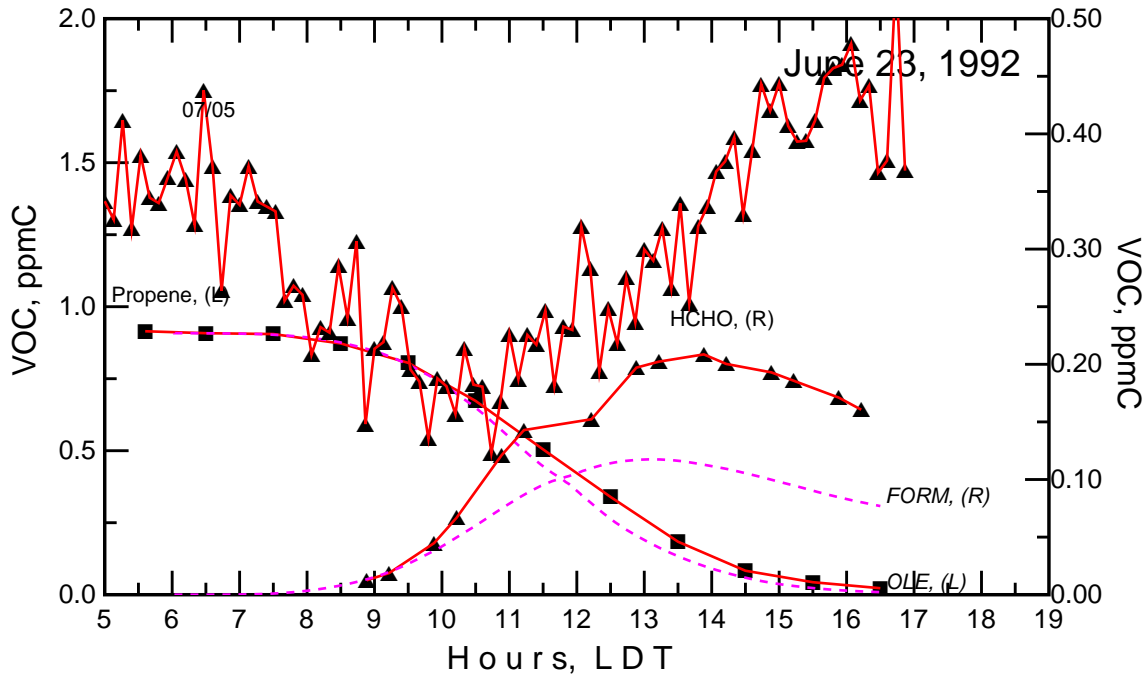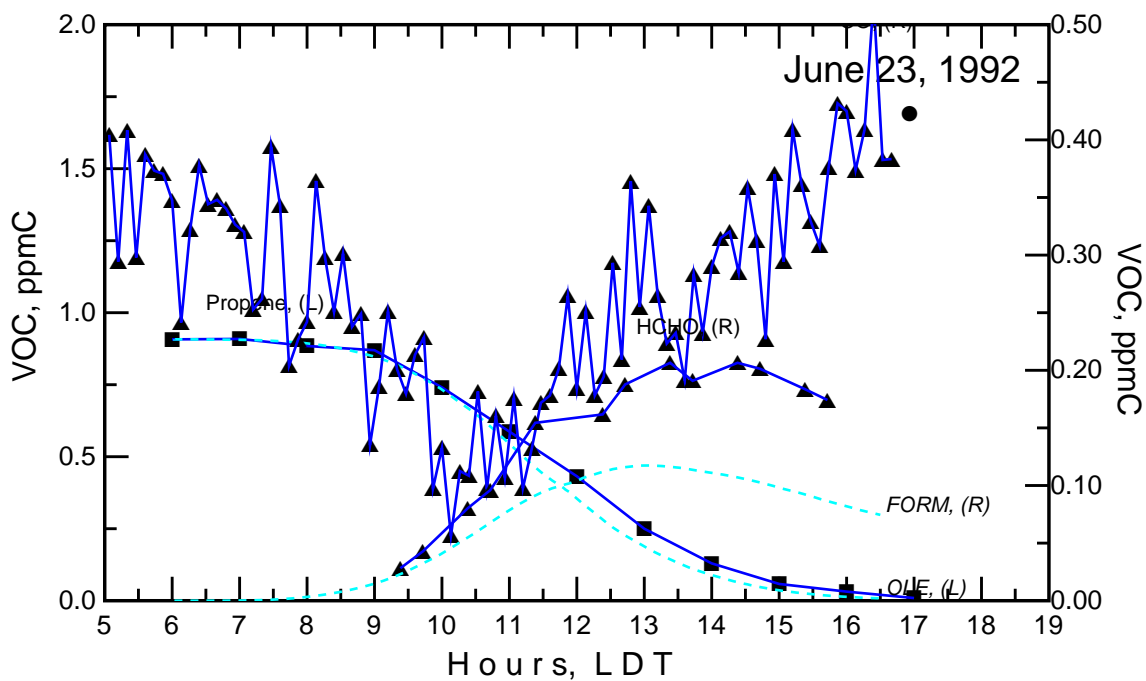

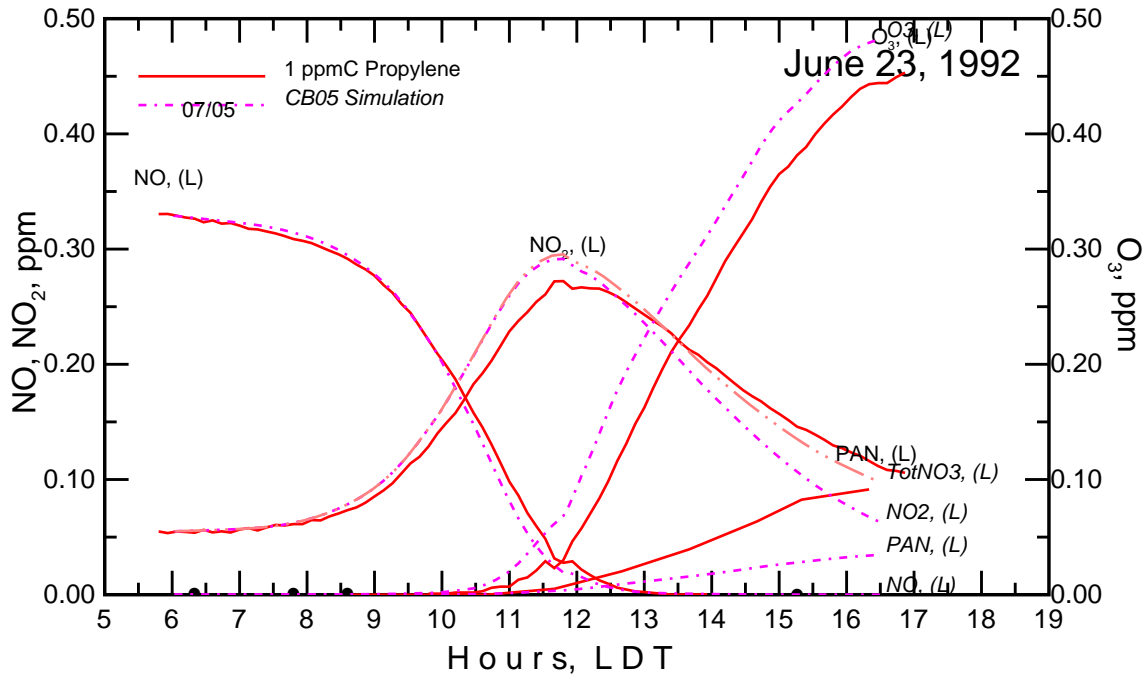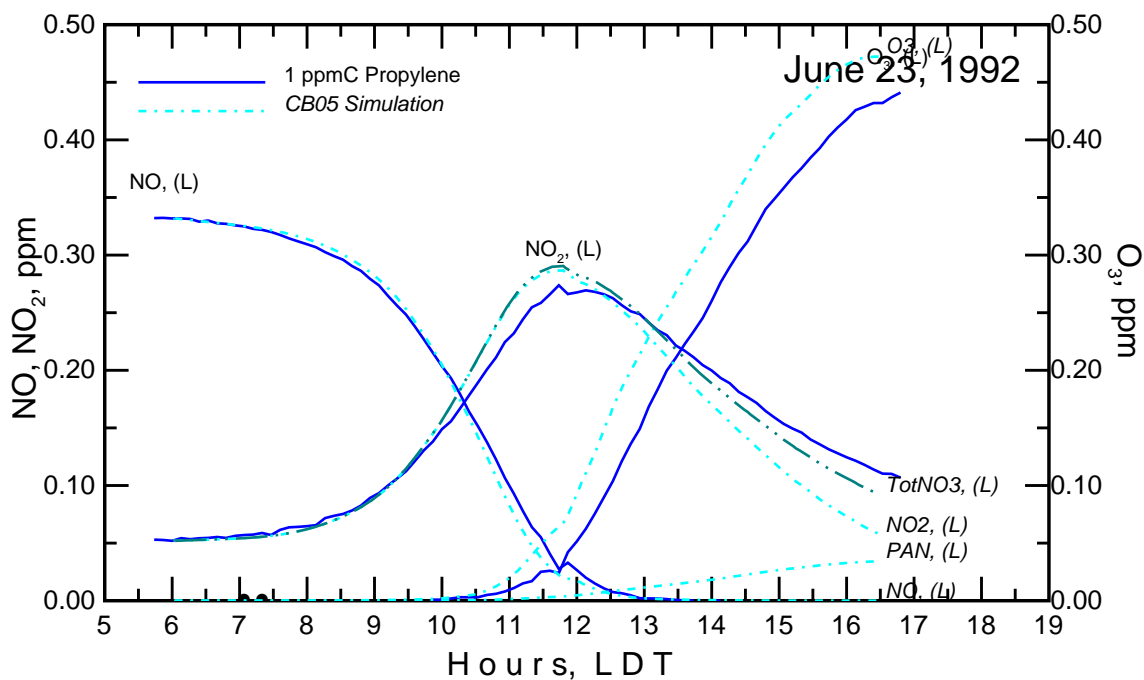

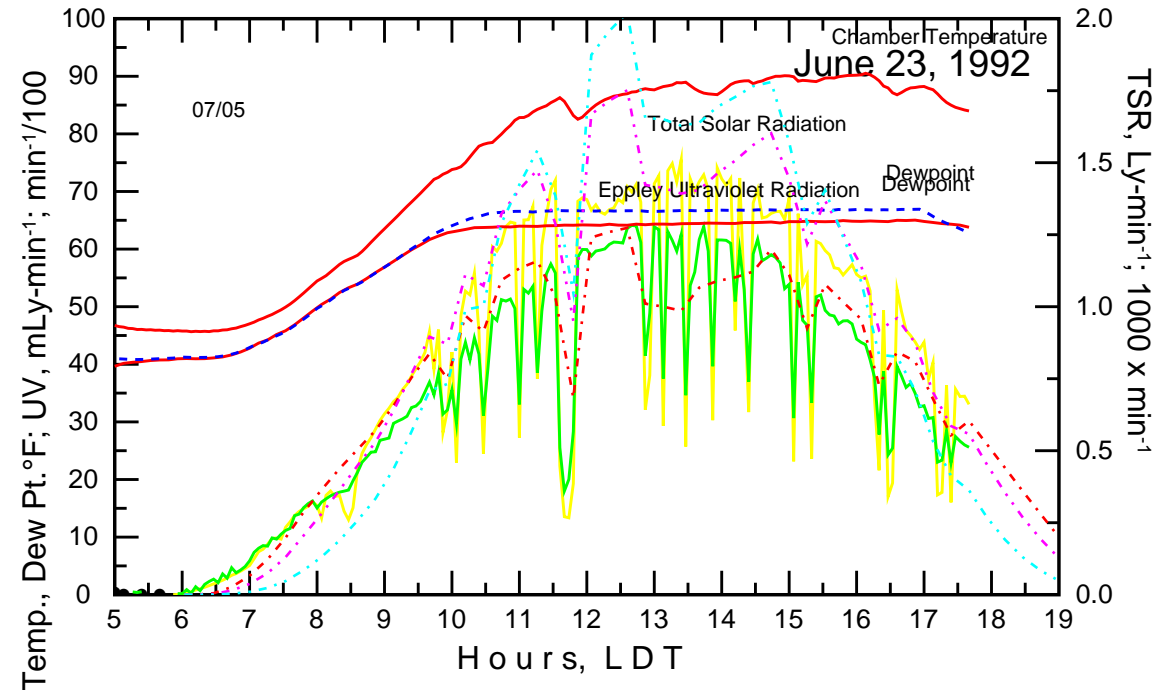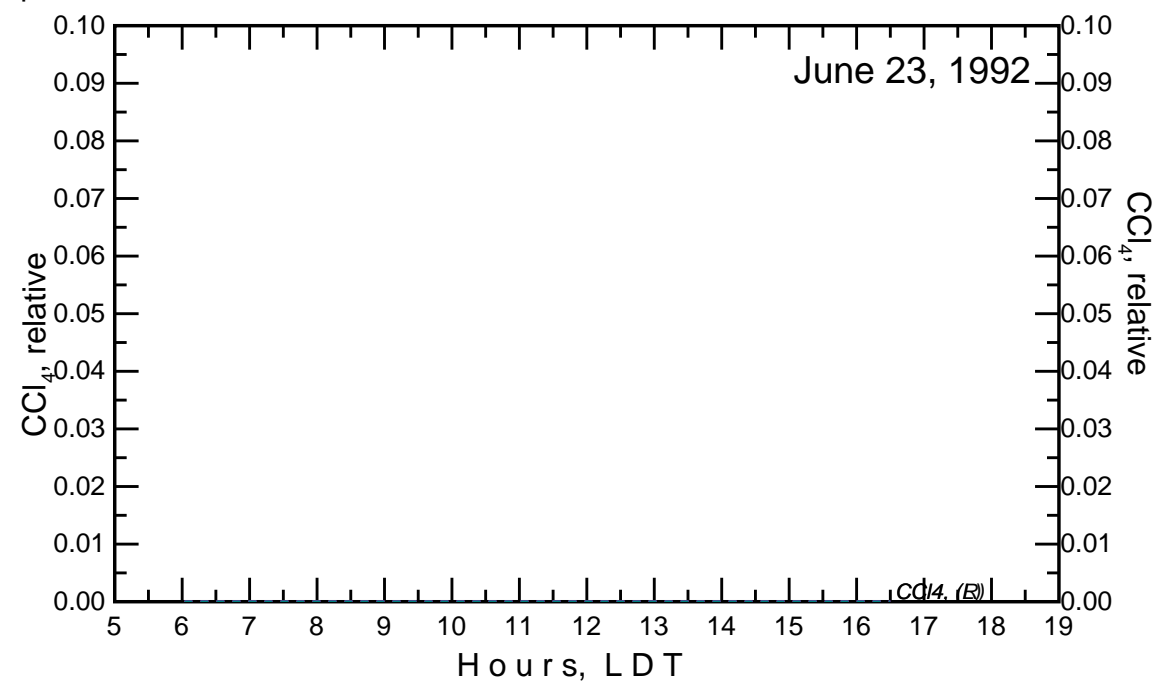

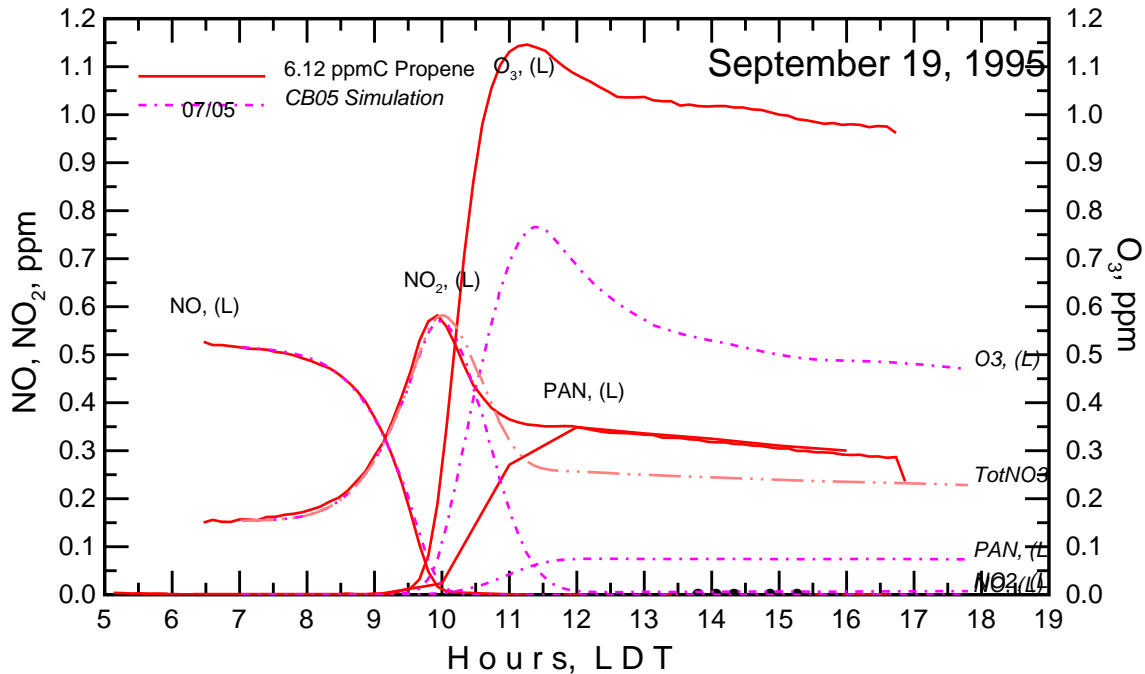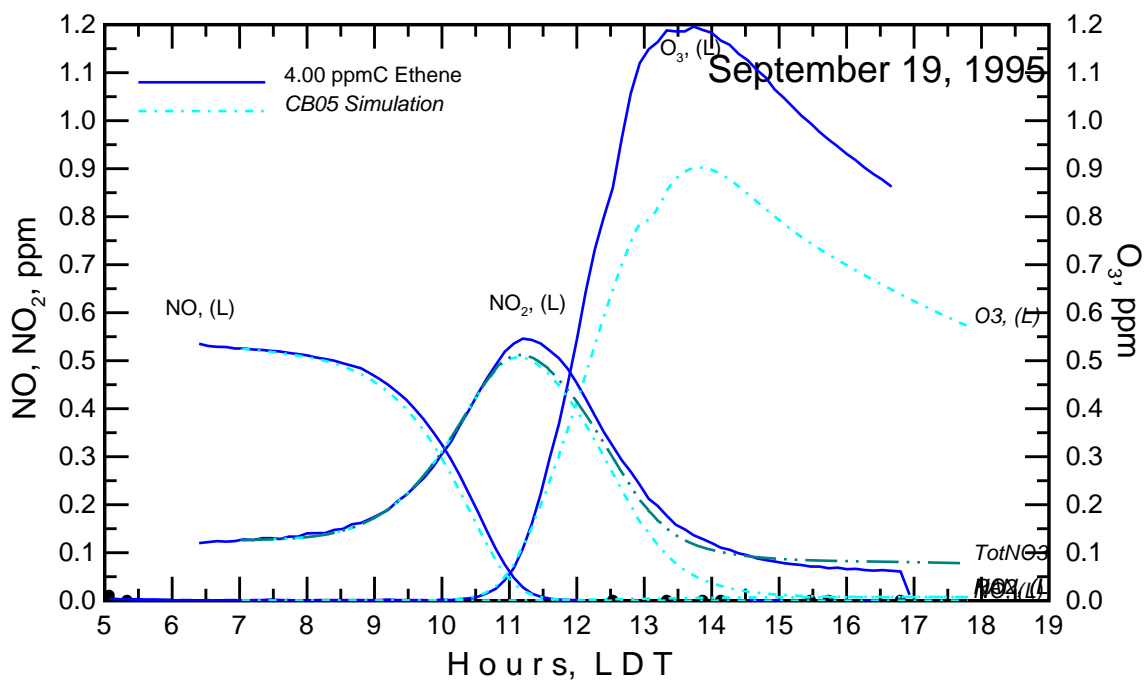

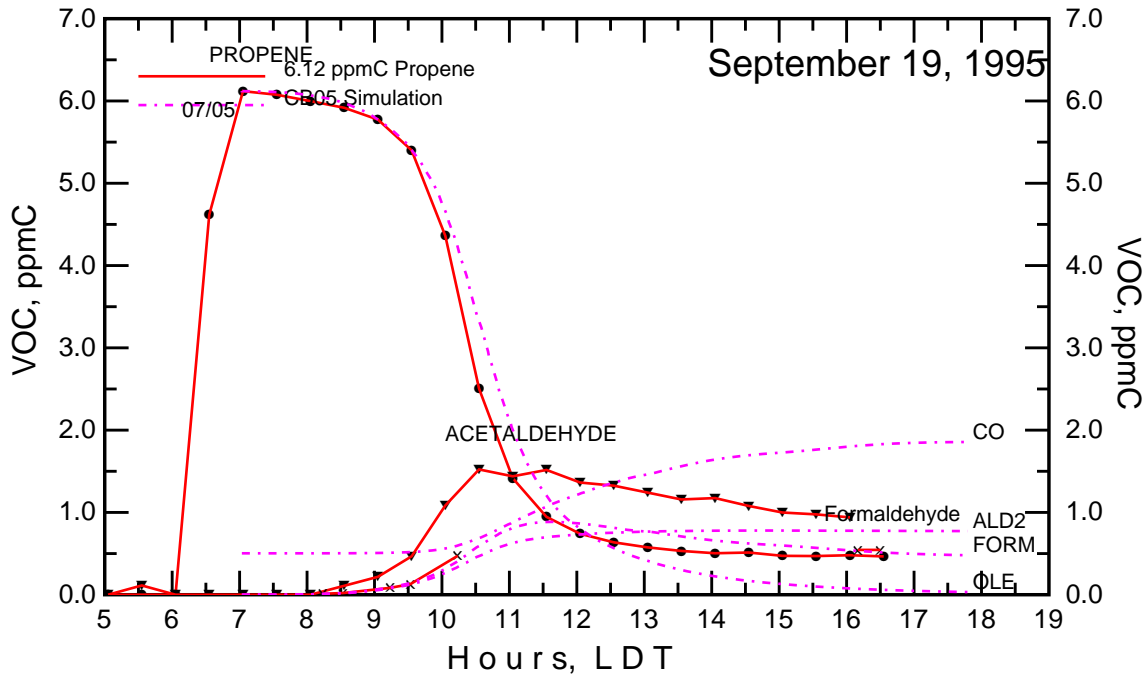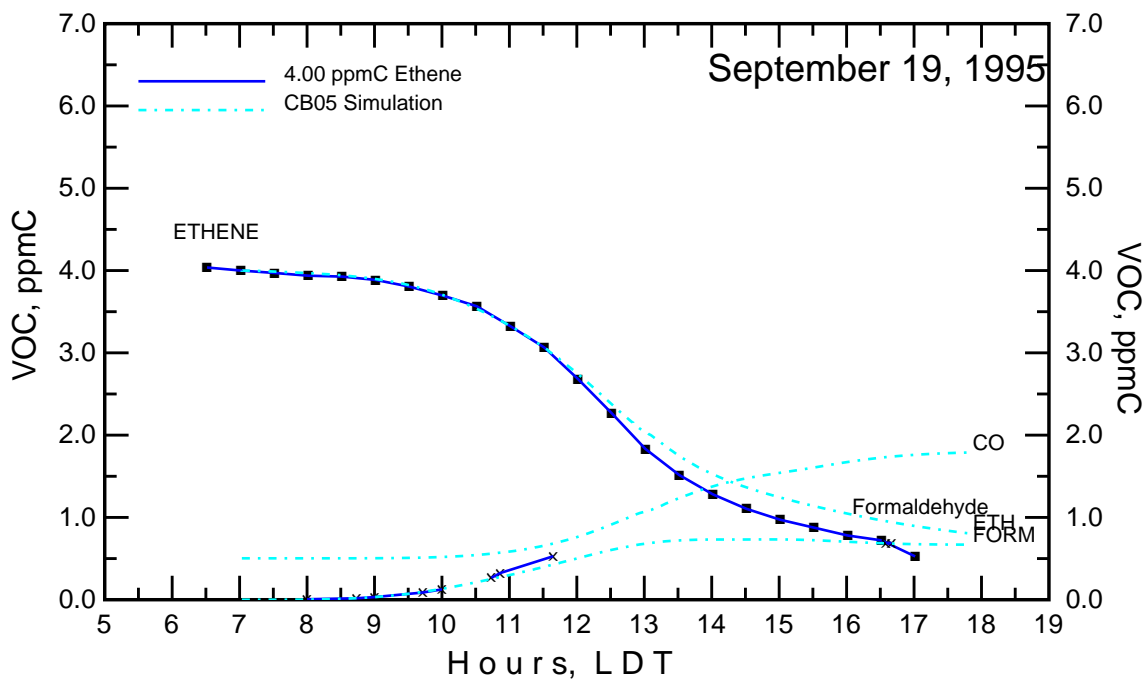

### **Olefin Mixtures (OLE and IOLE)**

AU 13 97

ST 13 02

ST 14 96

OC 16 96

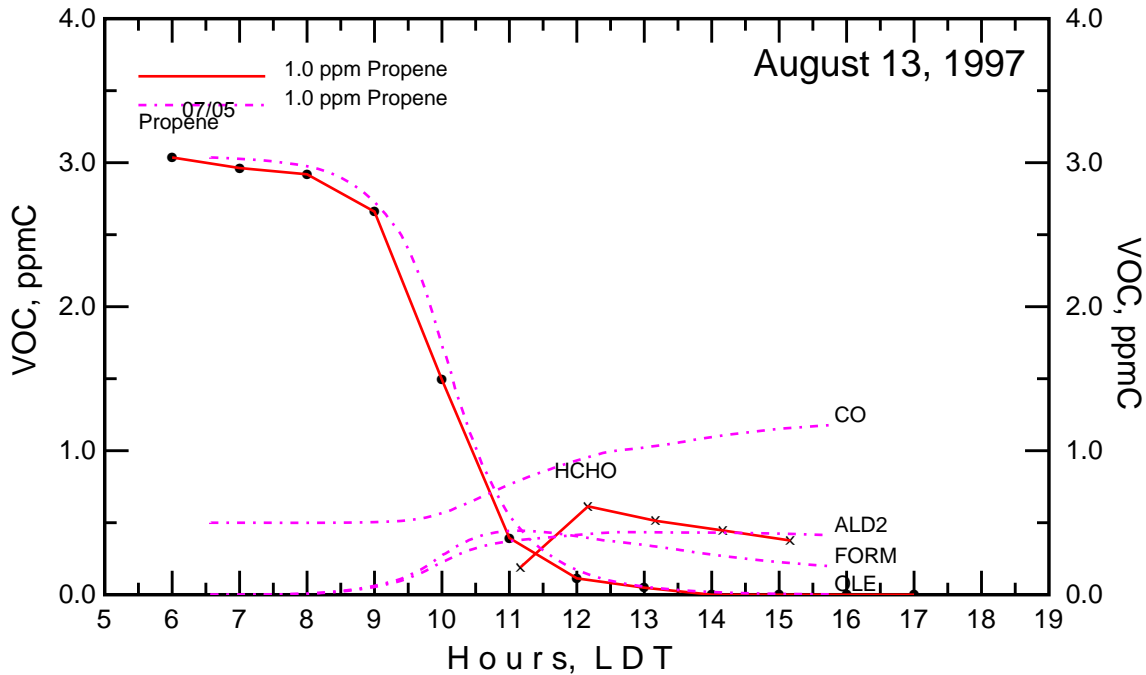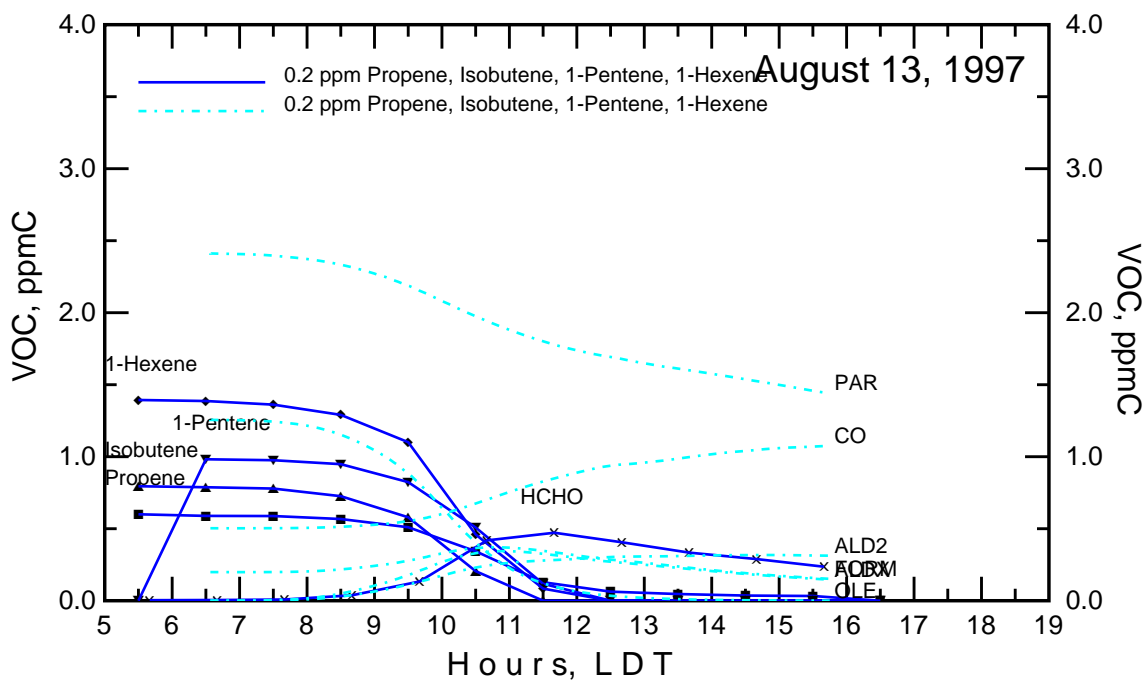

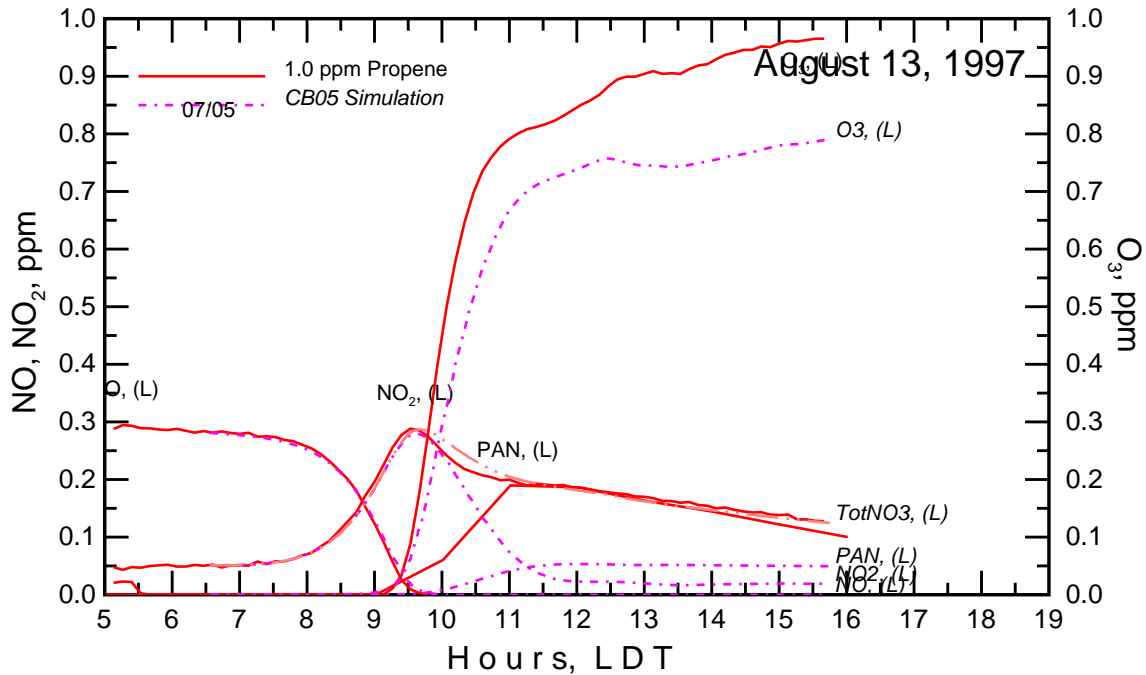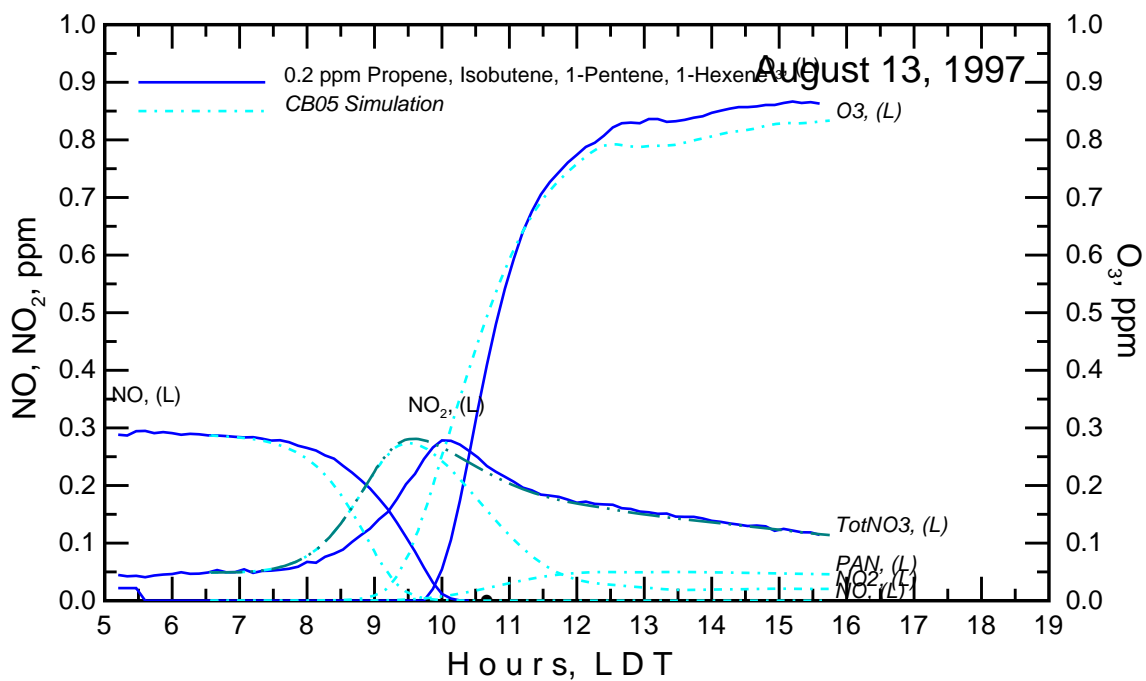

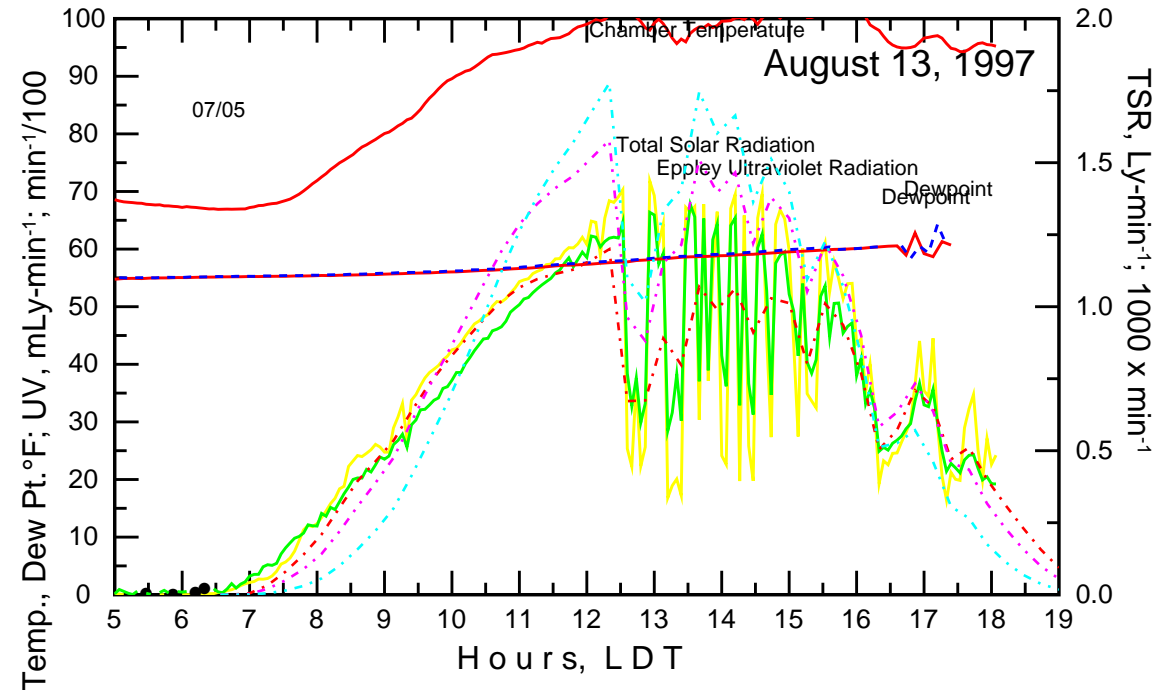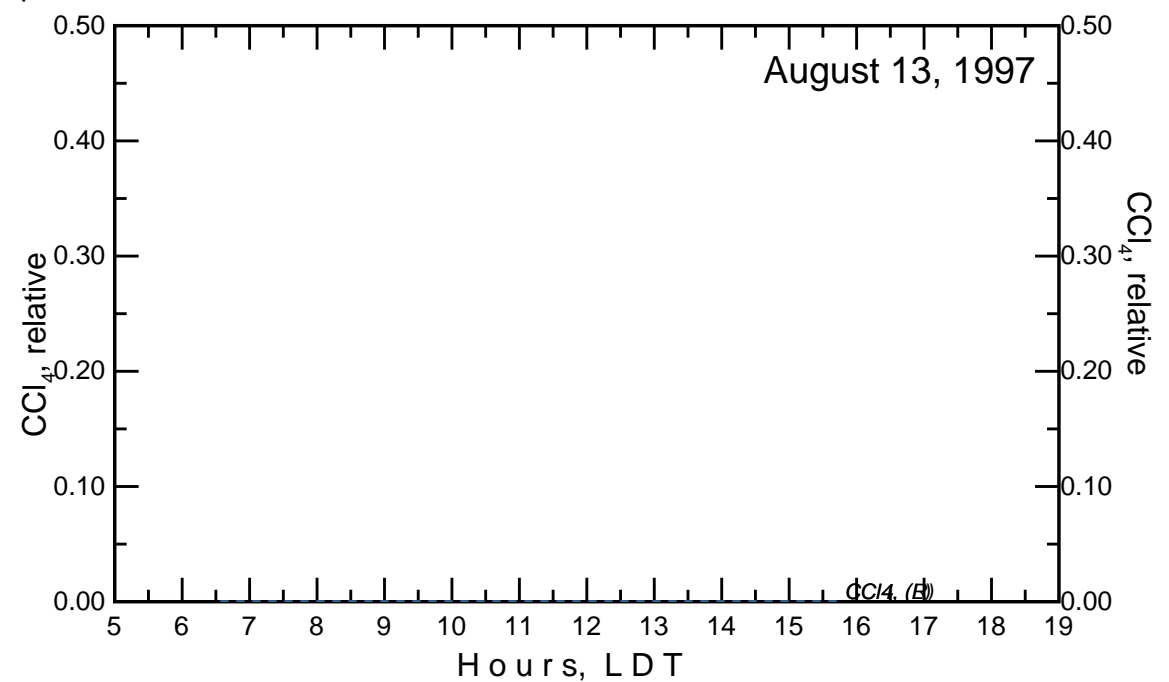

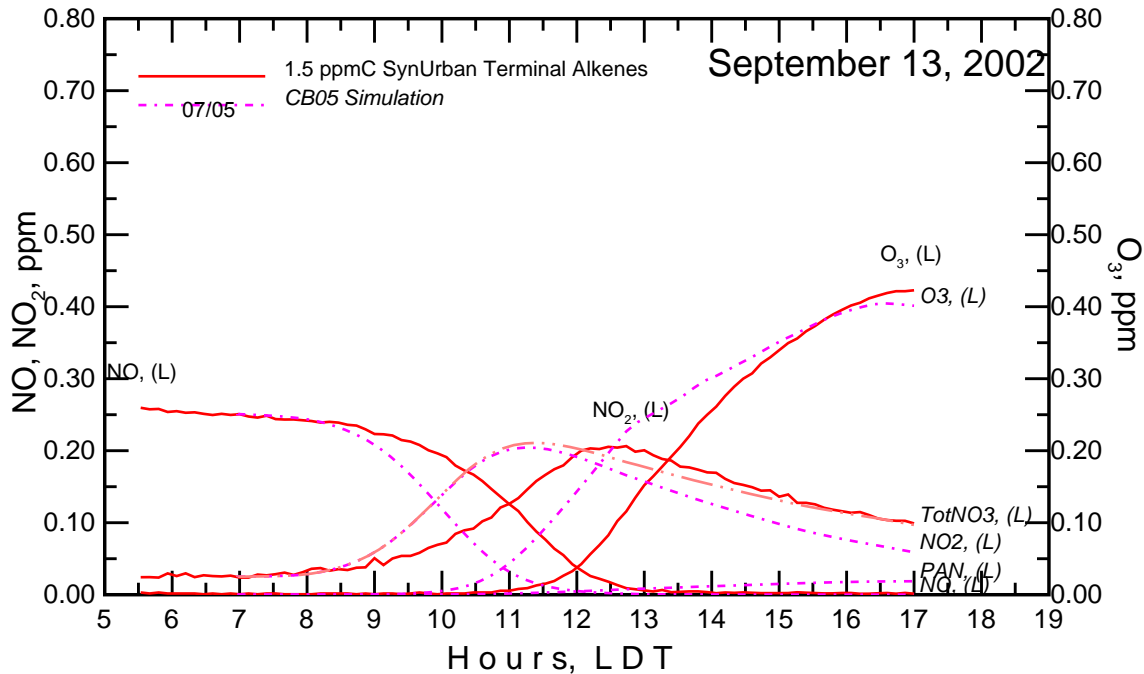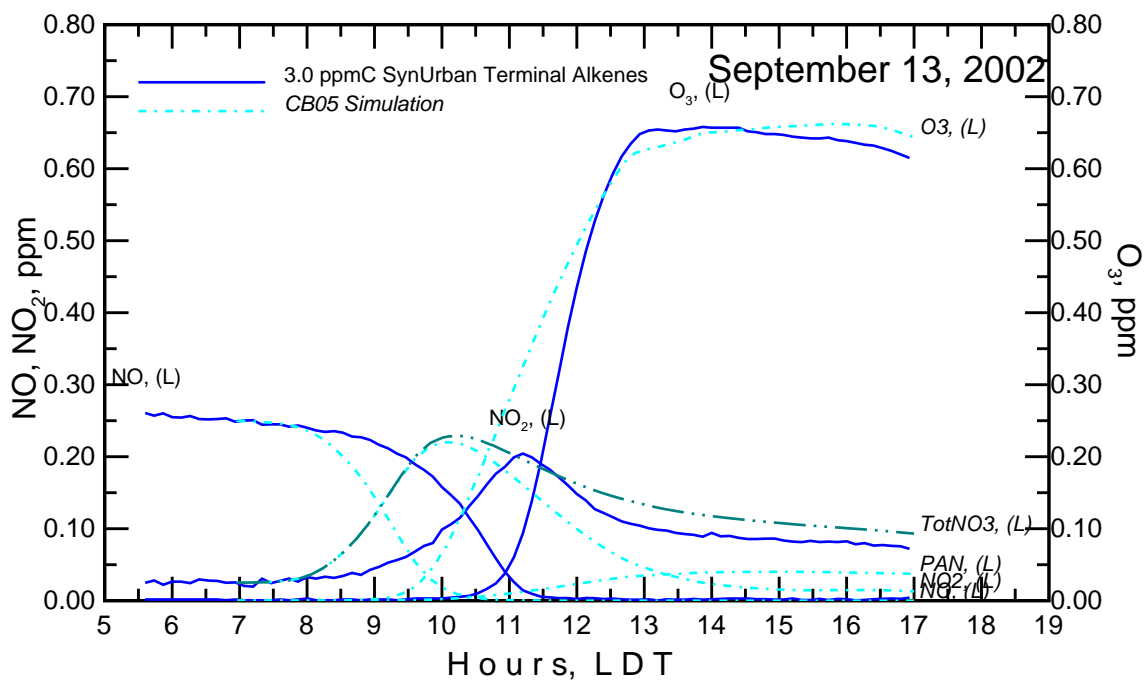

Delta SynUrban Mix Terminal Alkenes

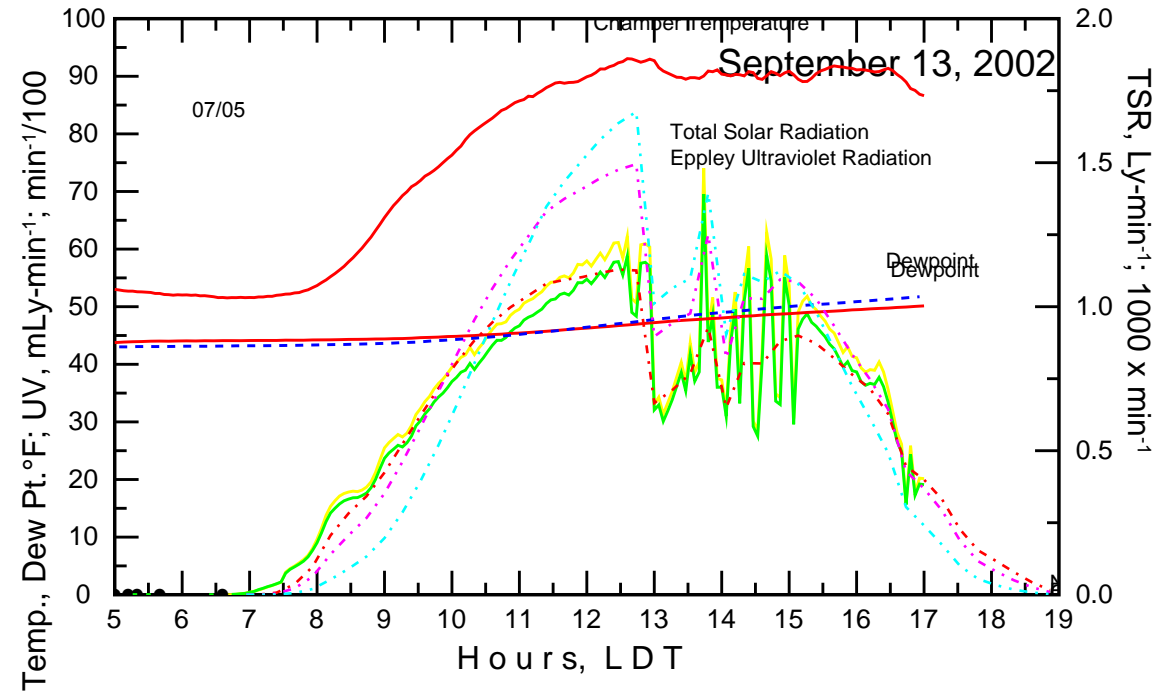

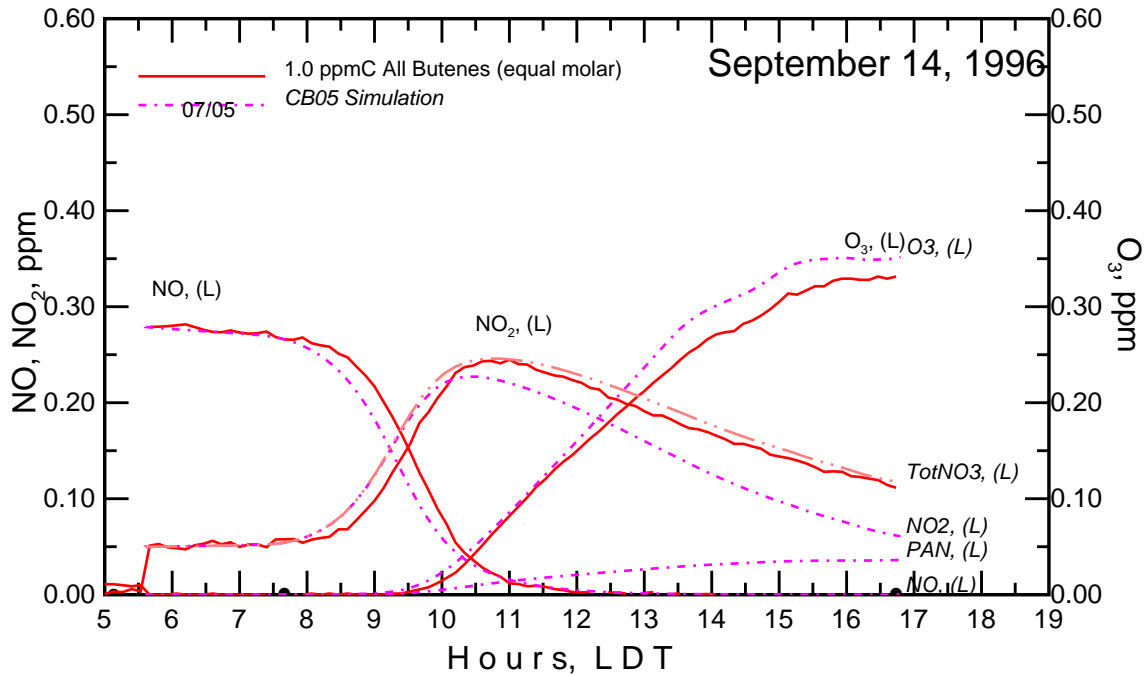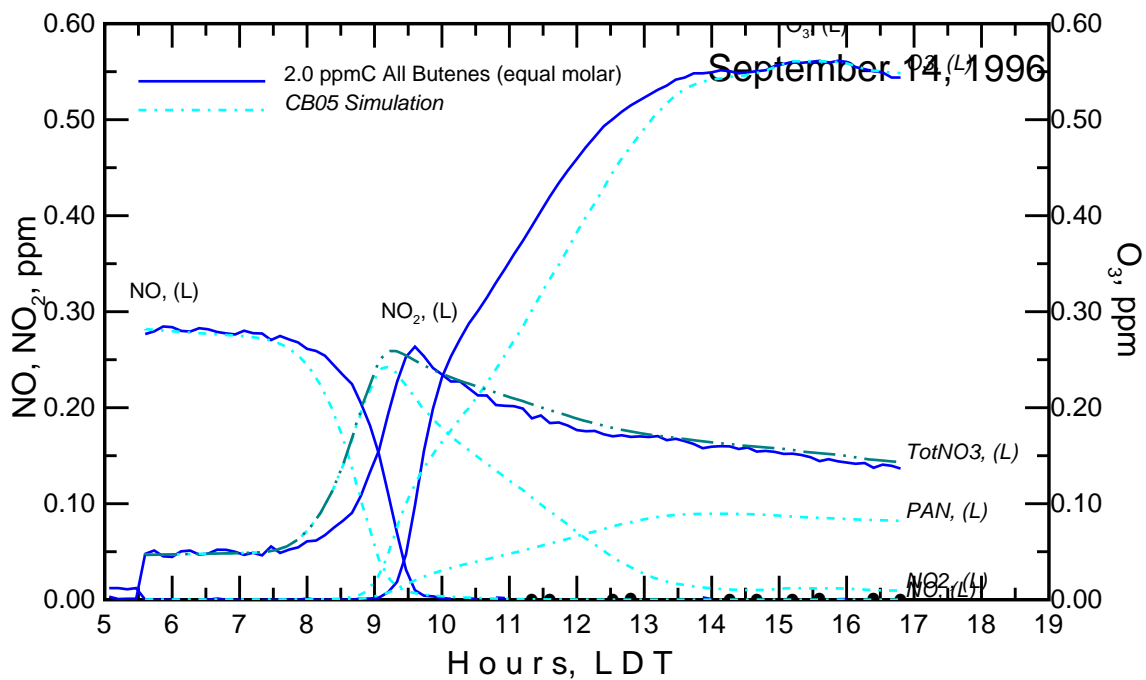

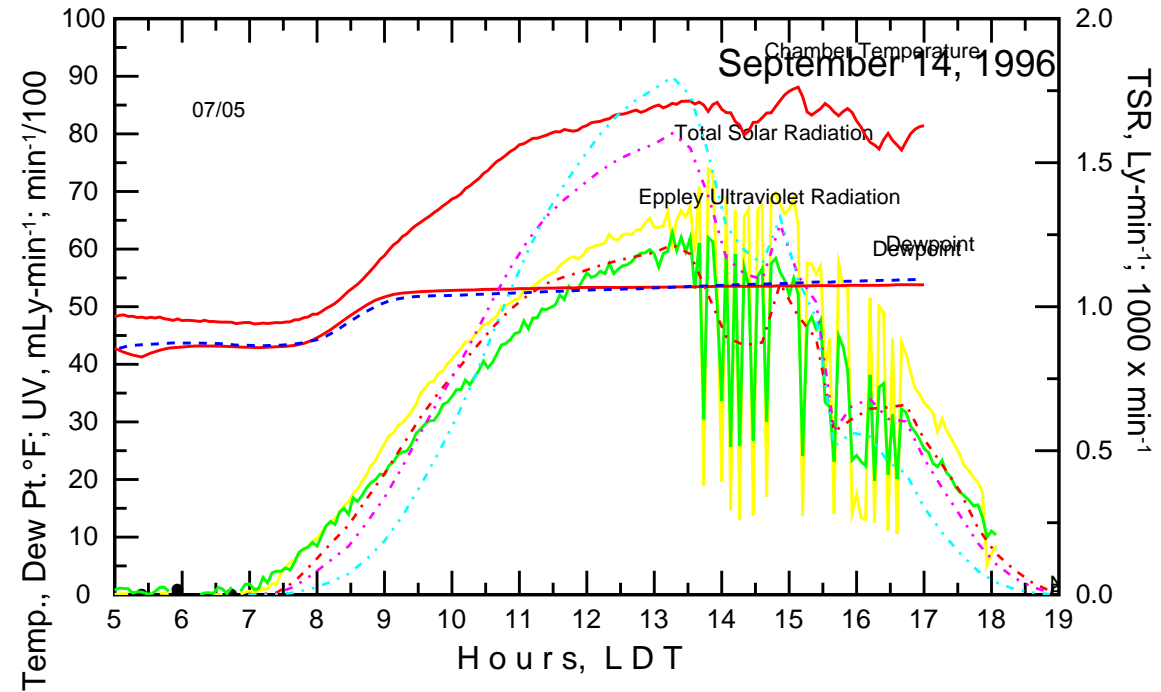

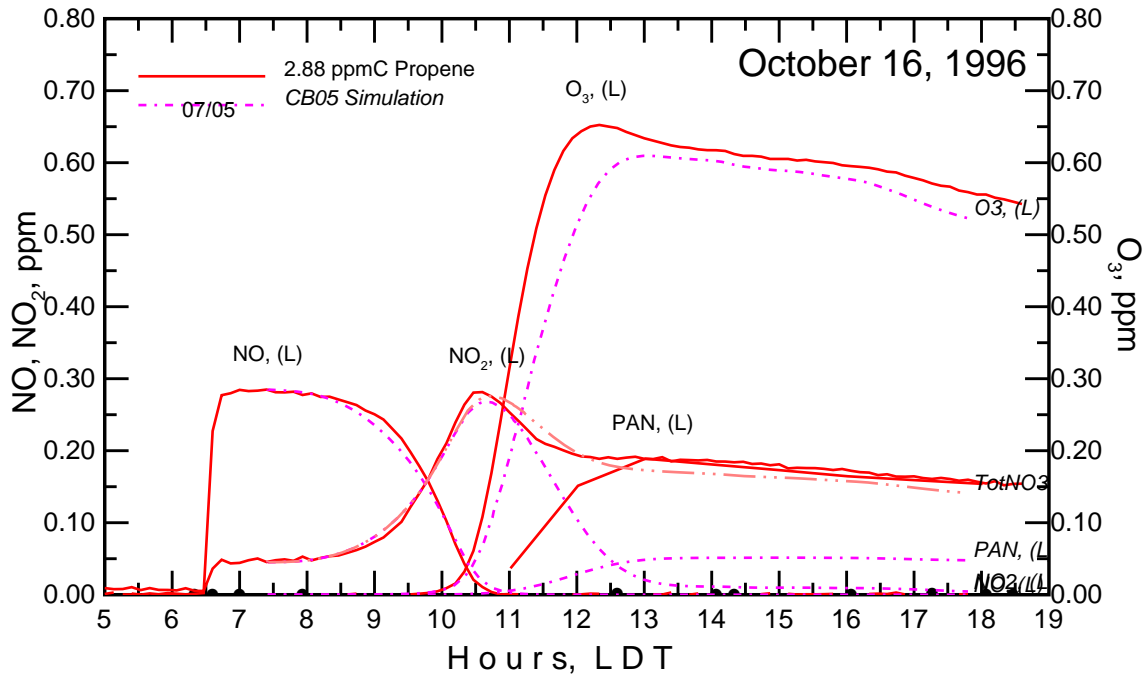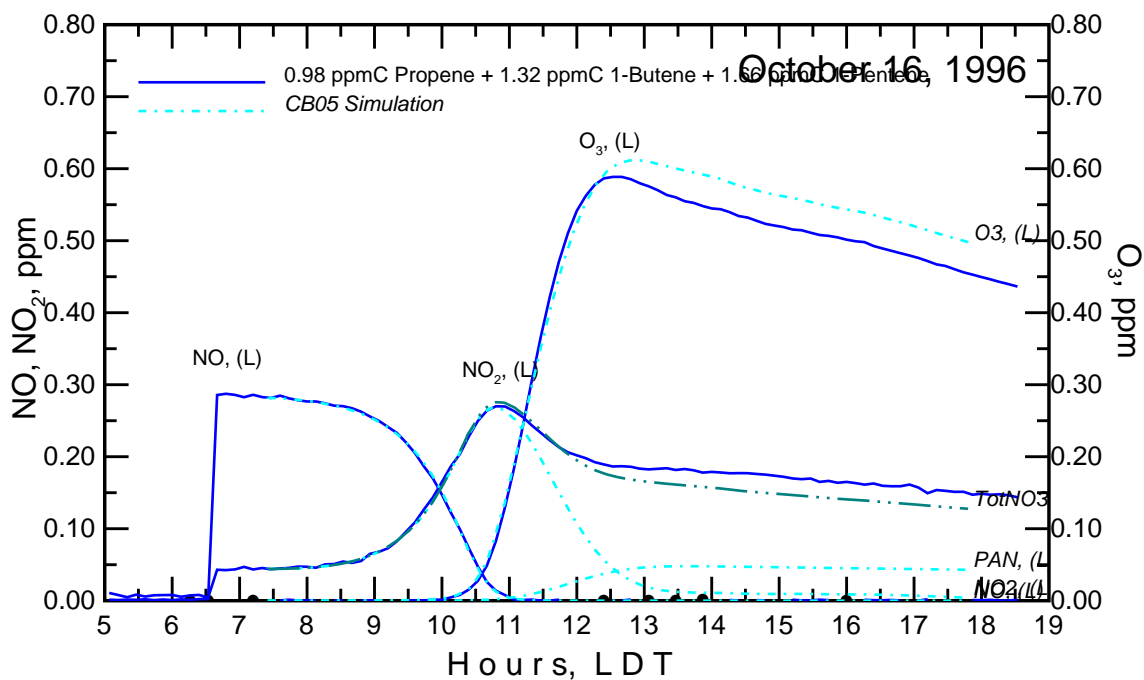

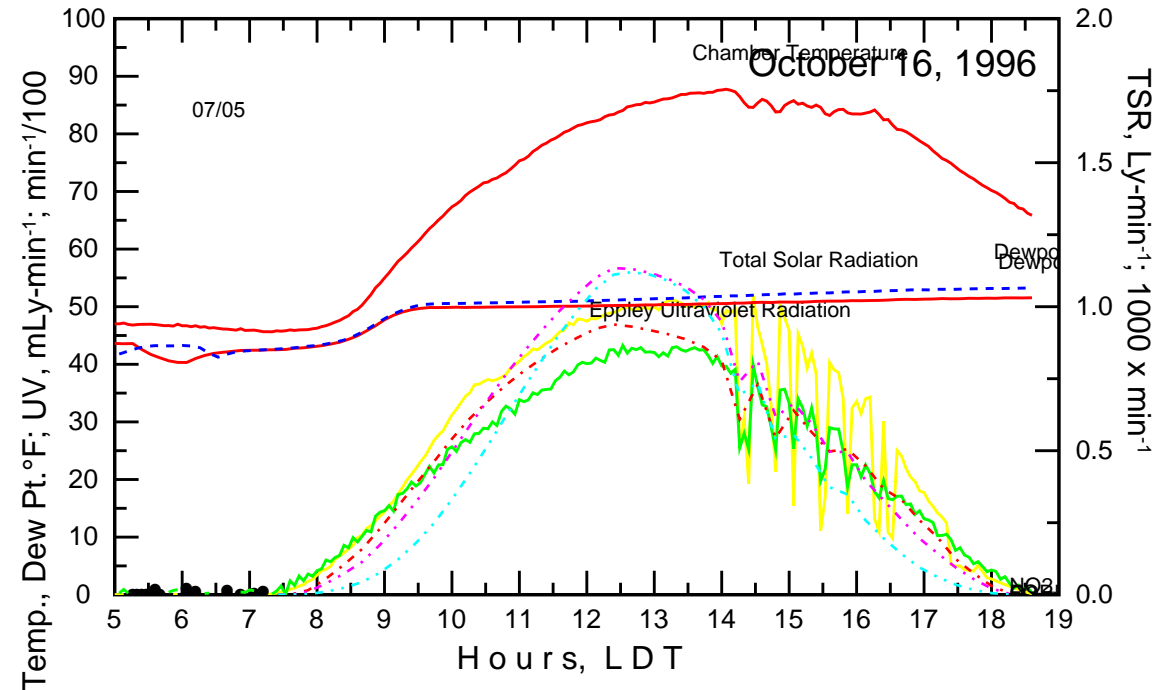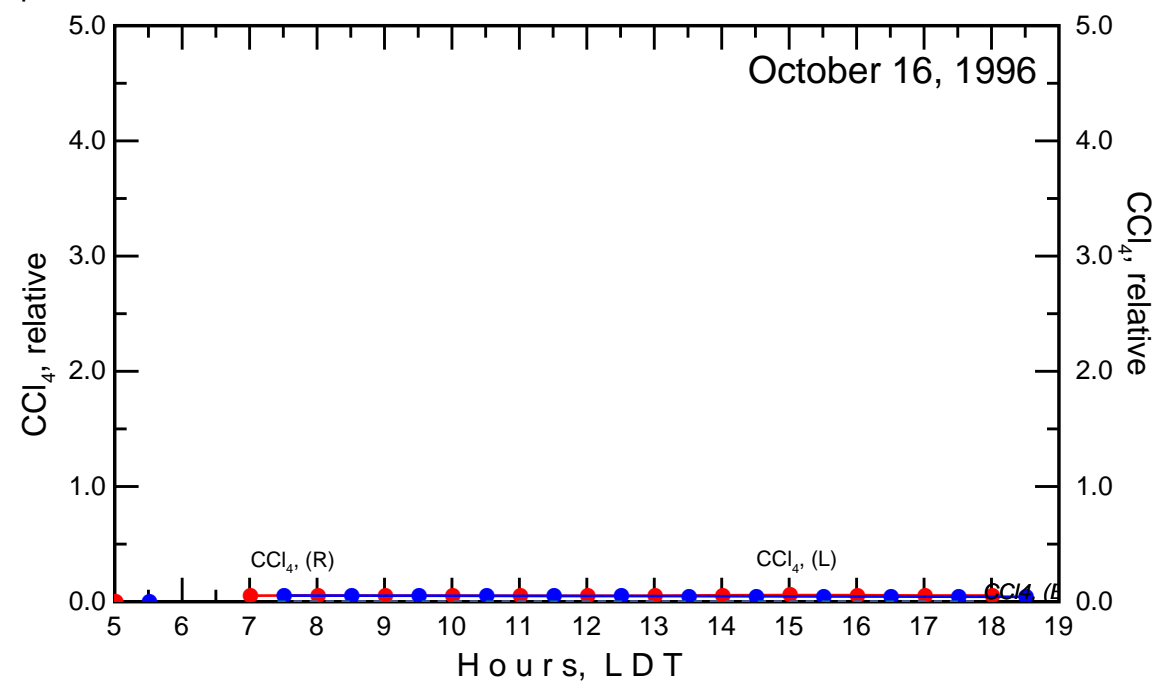

### **Alkanes (PAR)**

MY 22 92  
MY 23 92  
AU 16 96  
AU 19 83  
OC 11 01

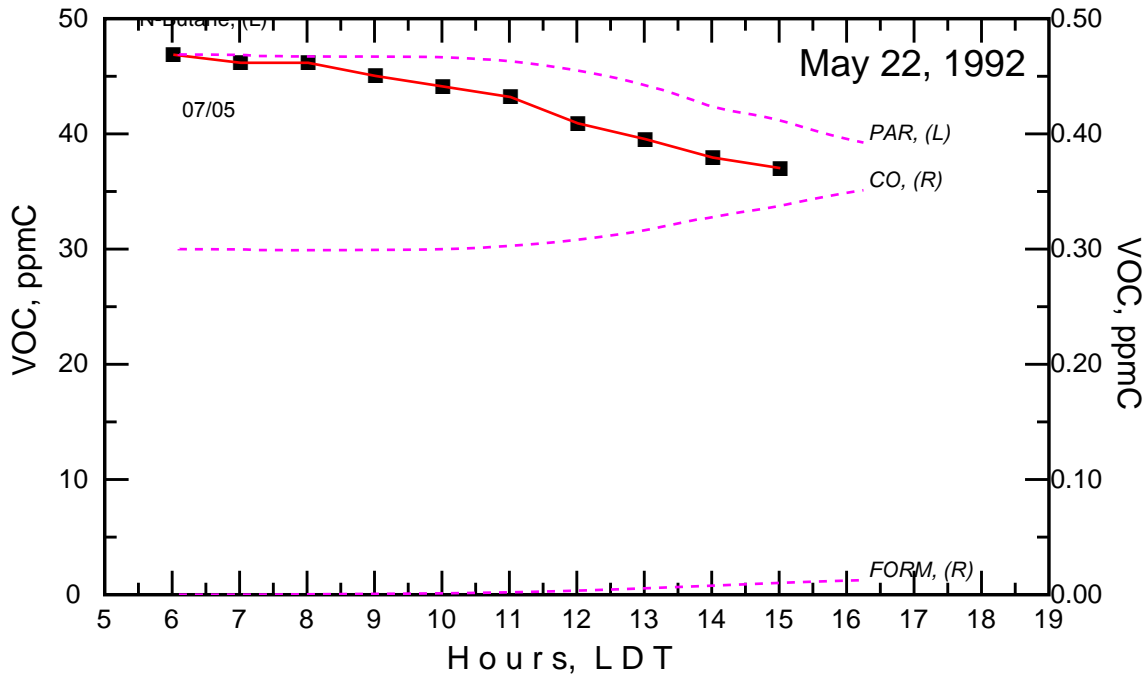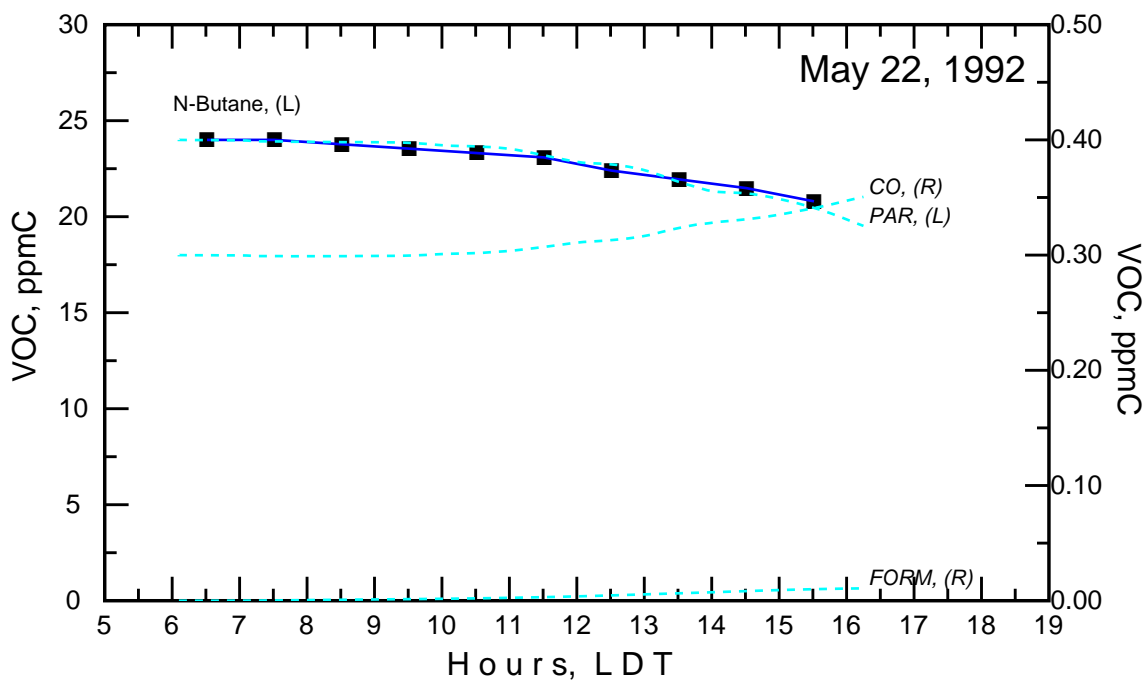

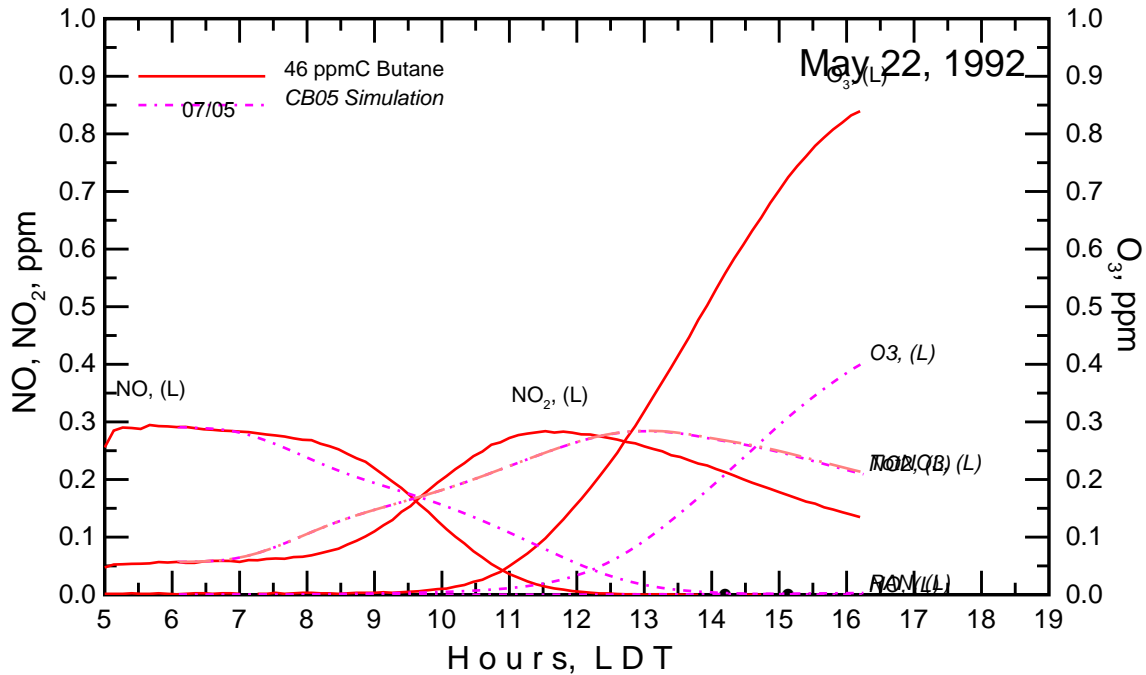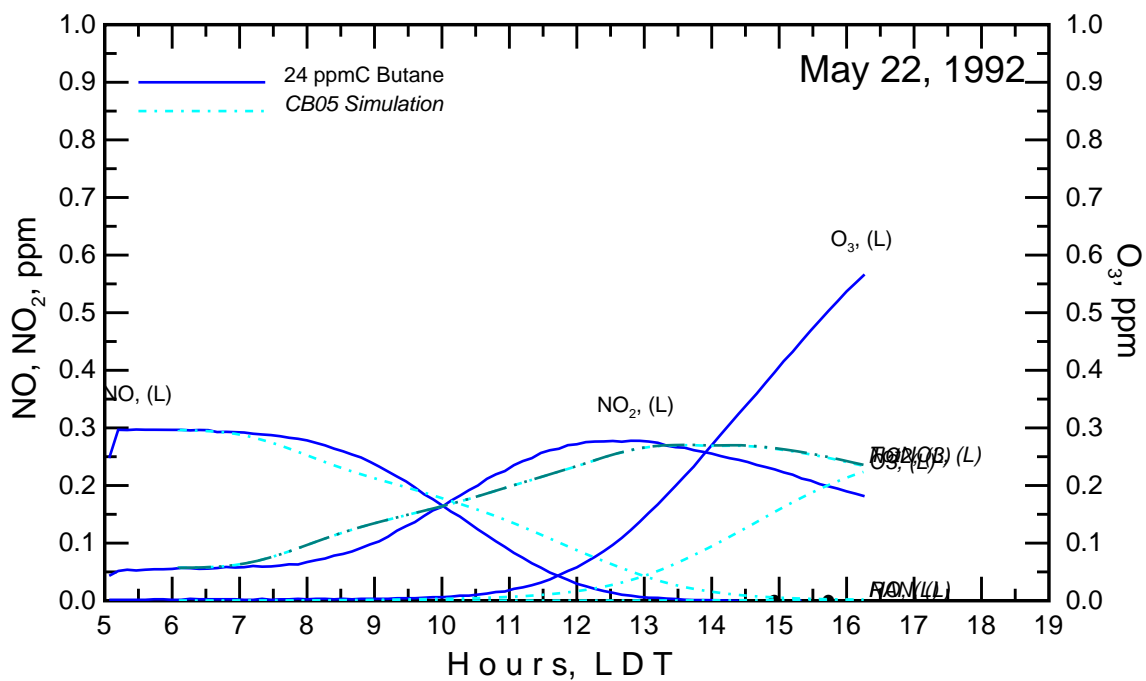

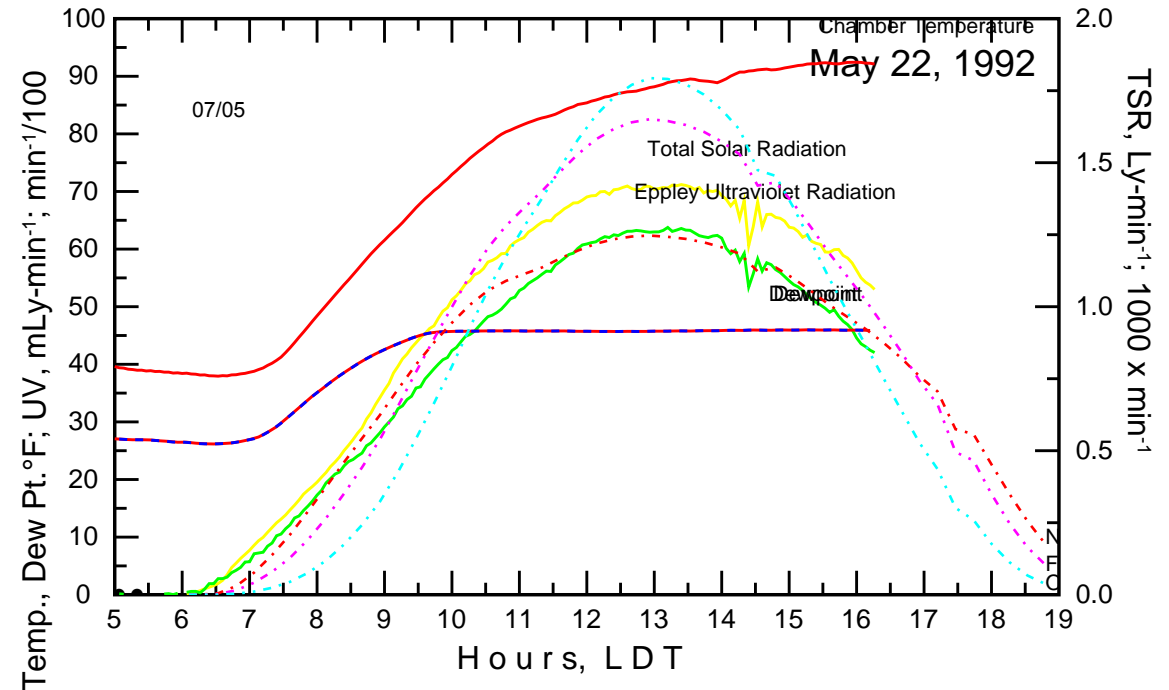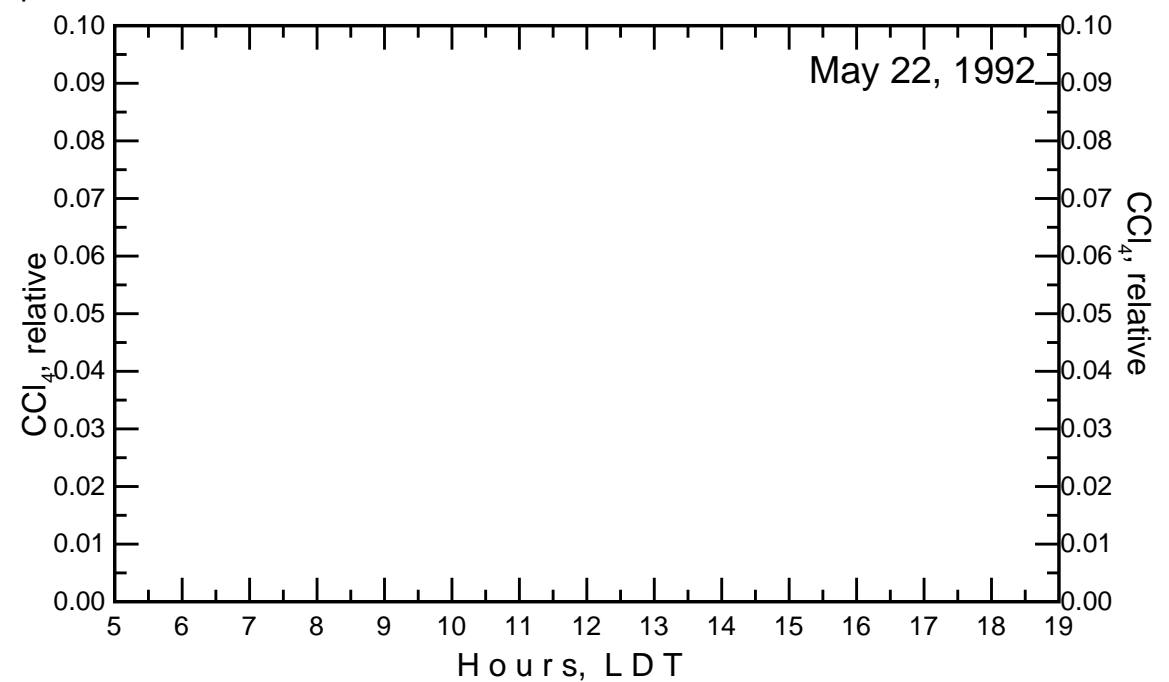

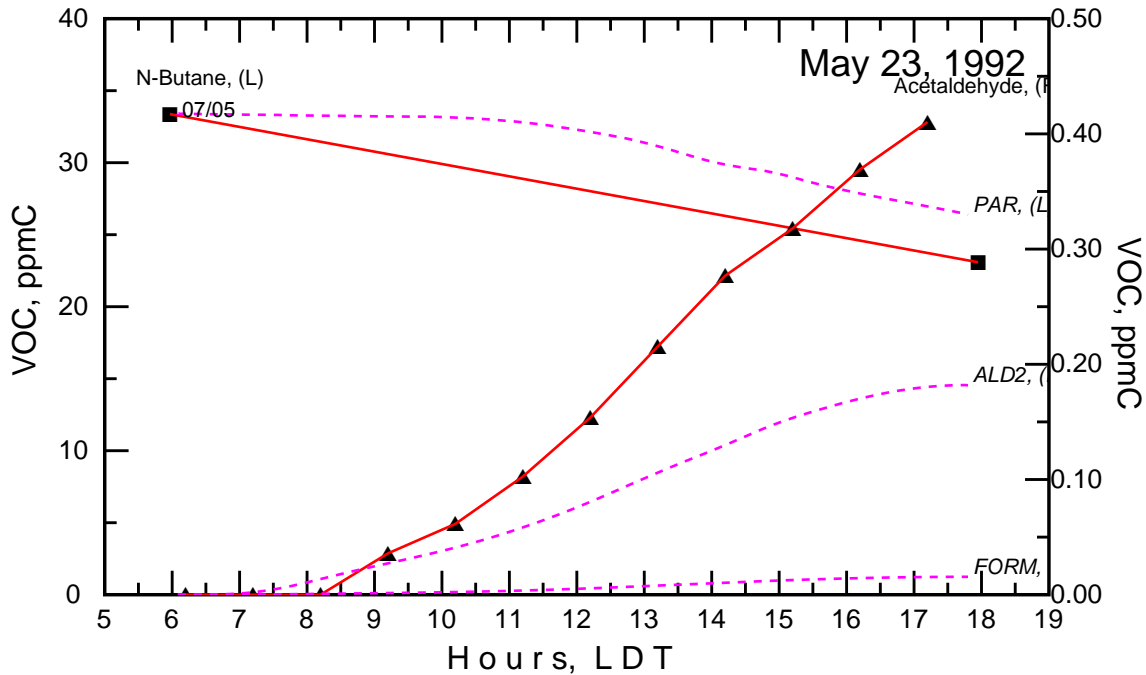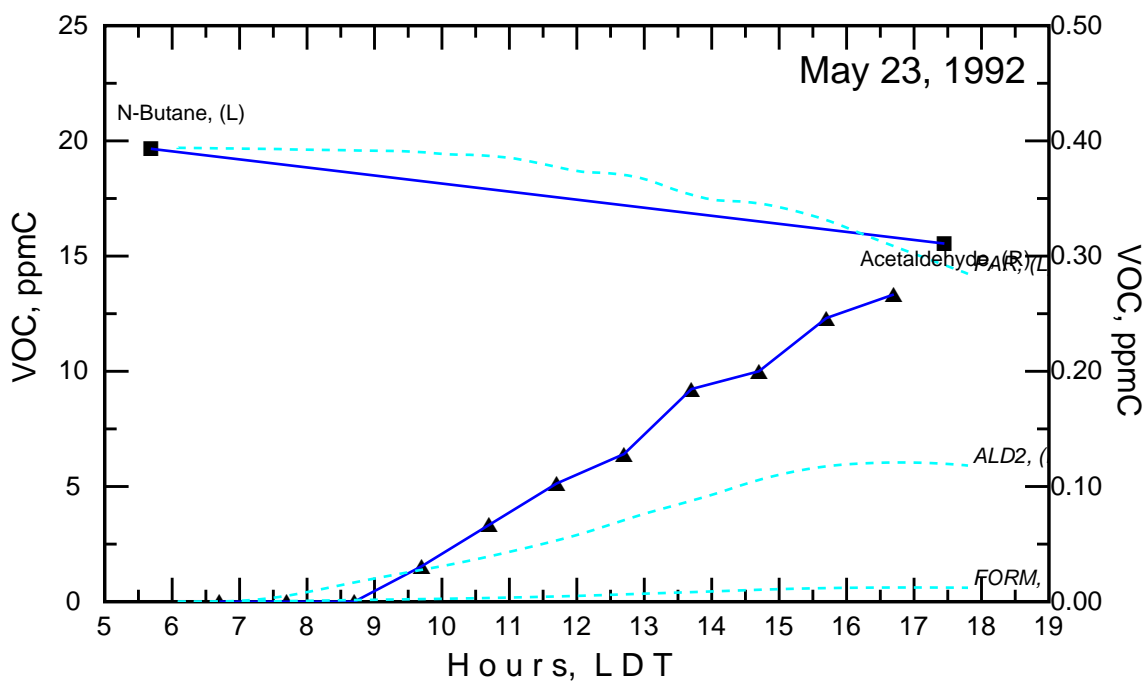

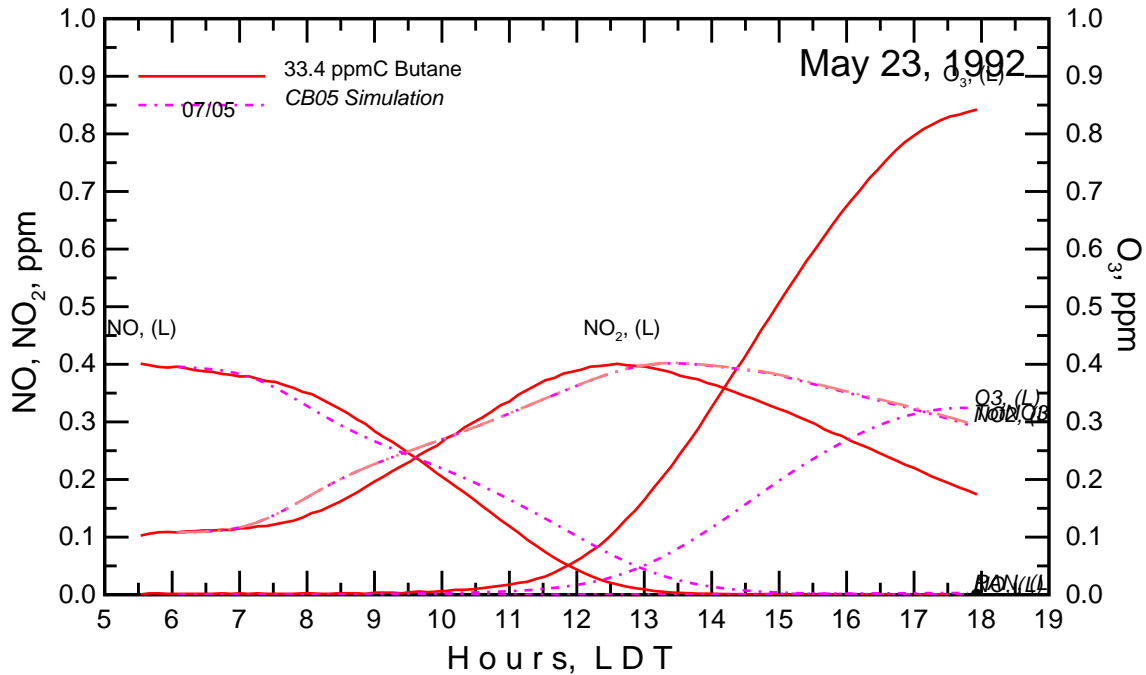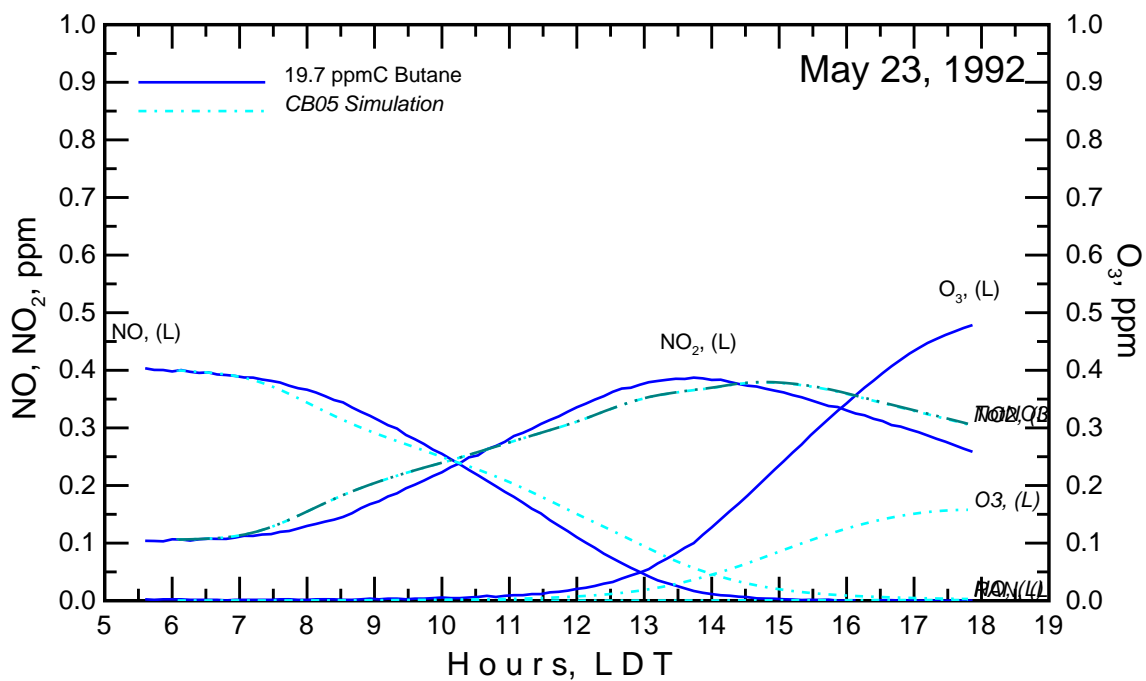

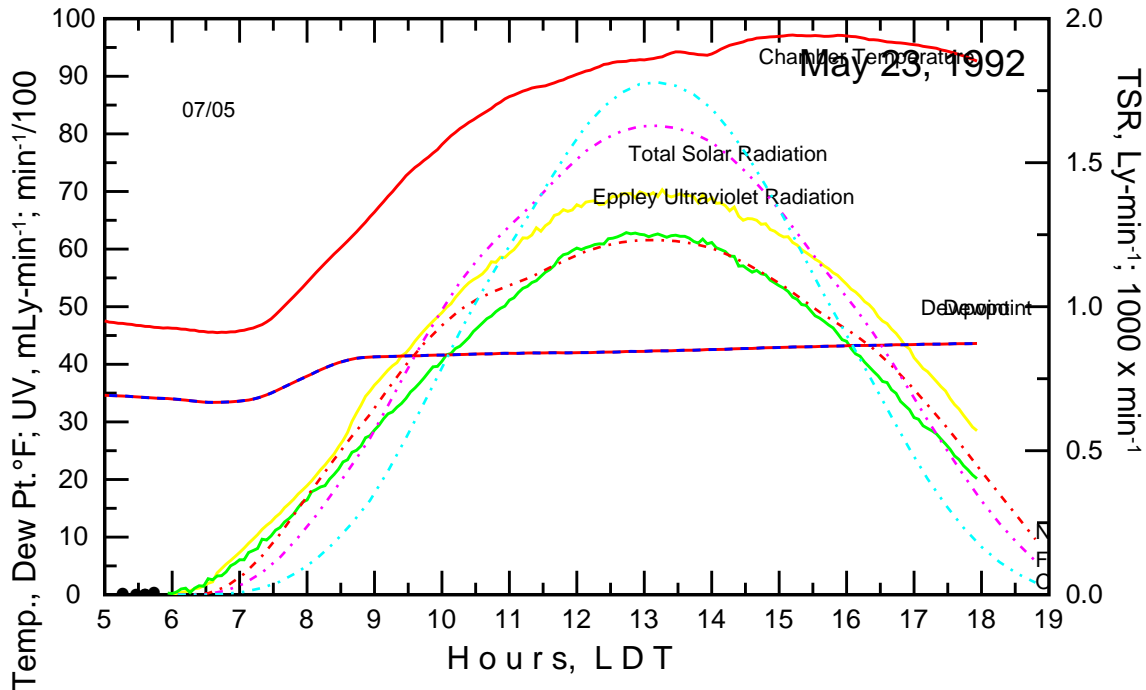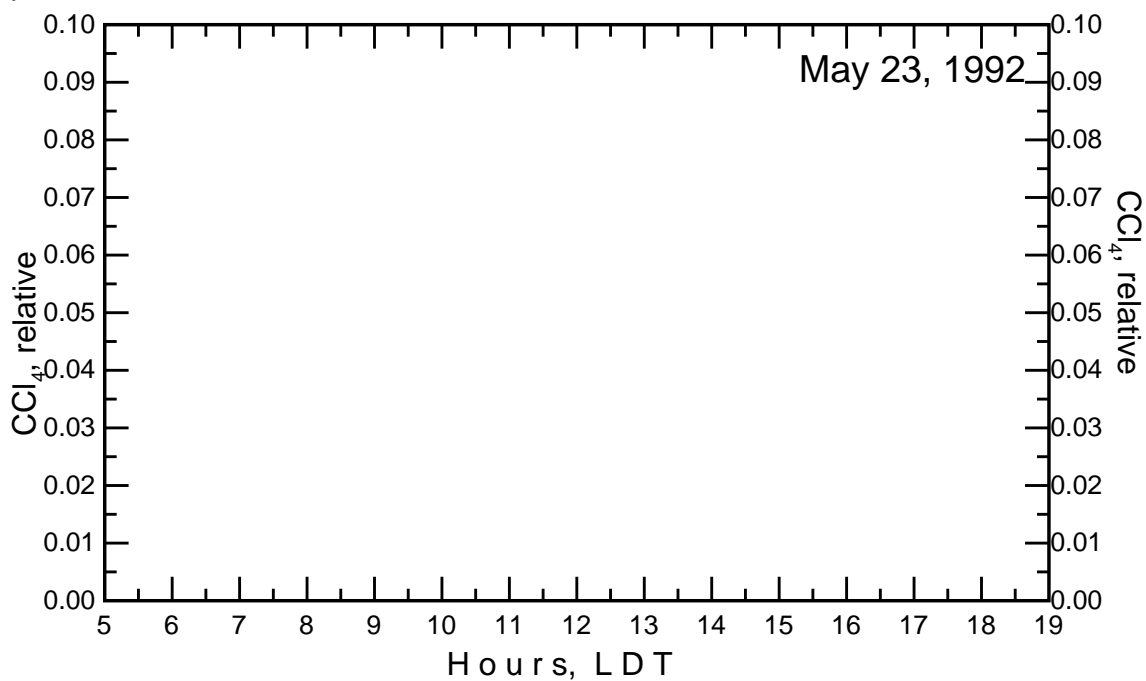

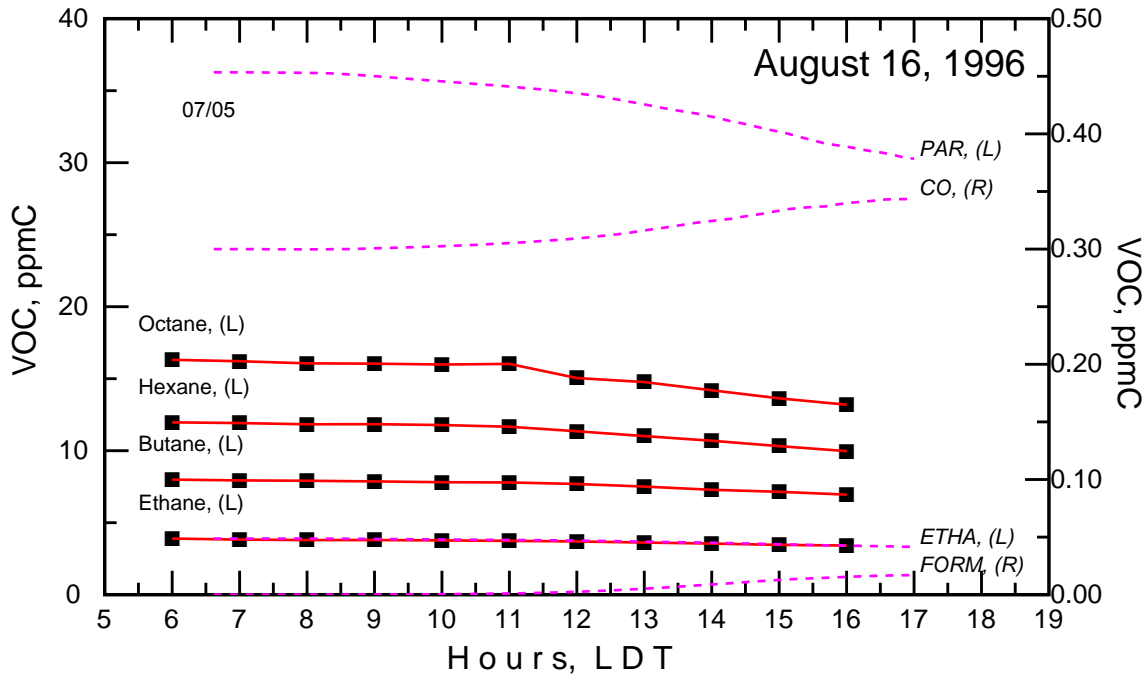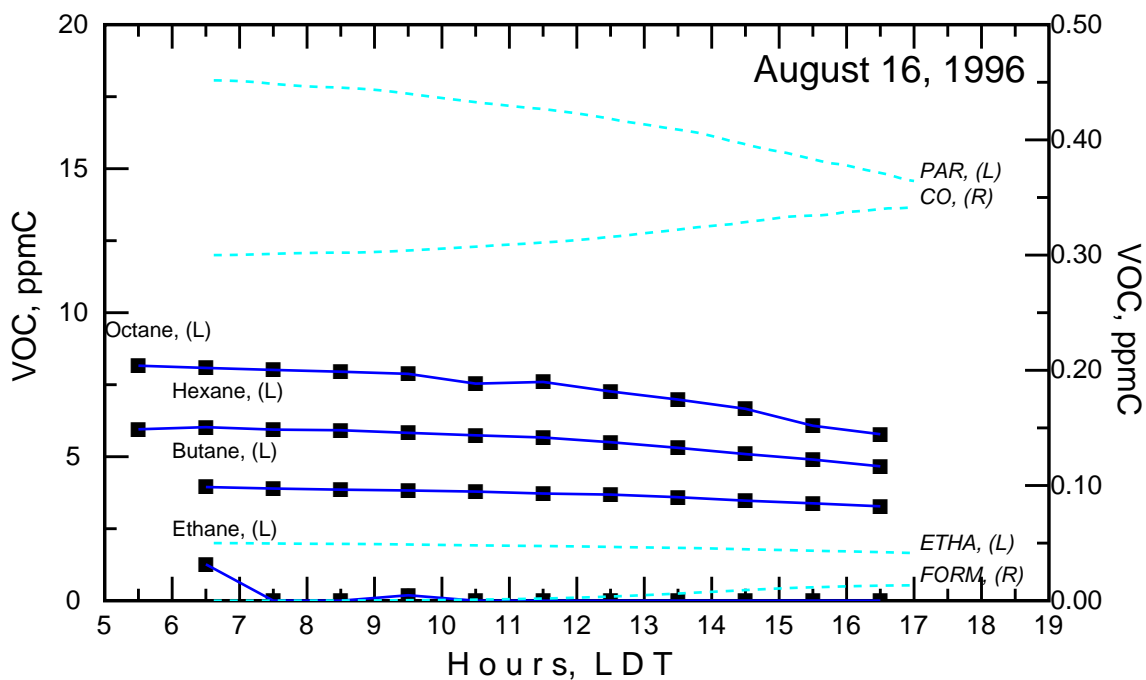

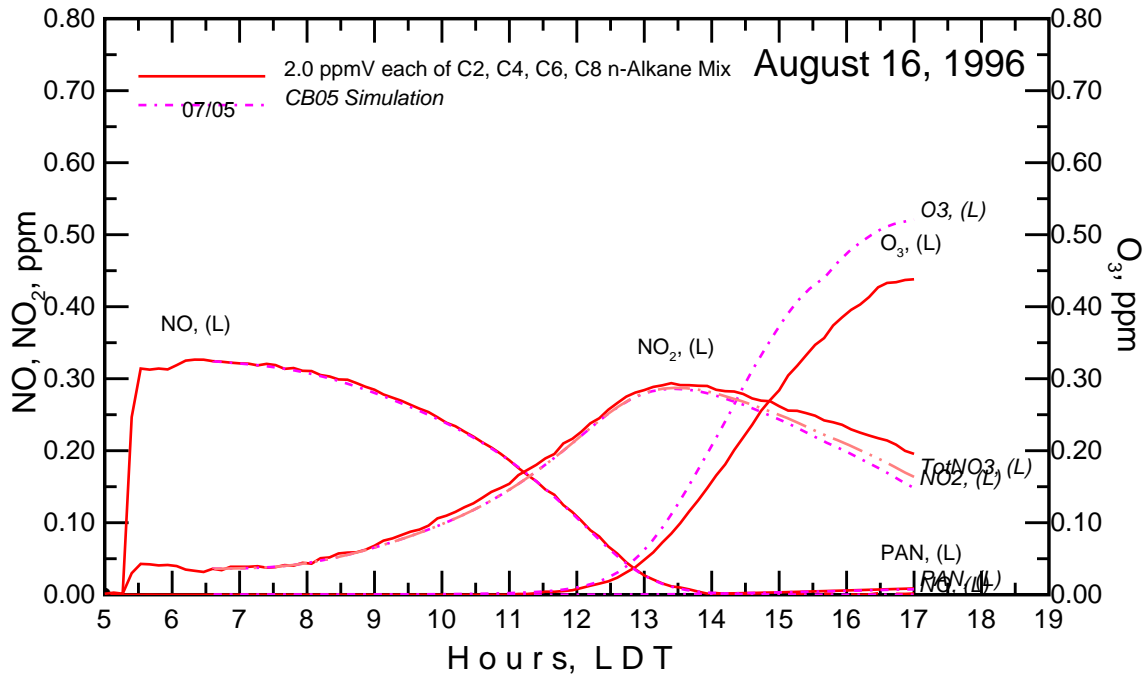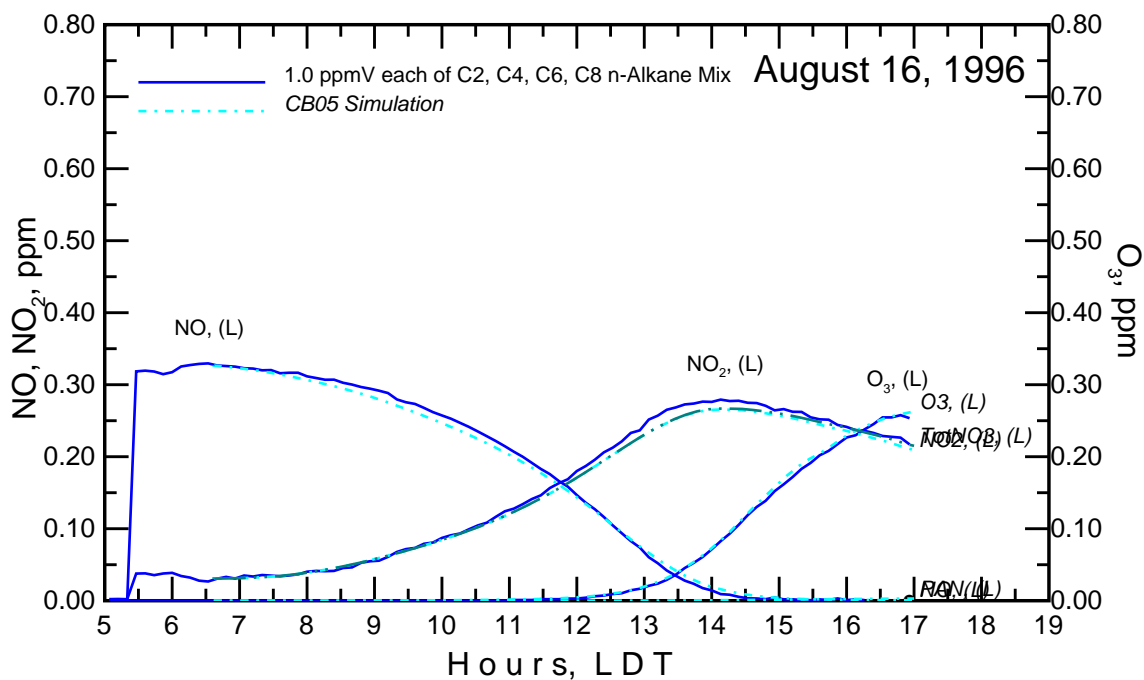

40 ppmC Alkane Mix vs 20 ppmC Alkane Mix

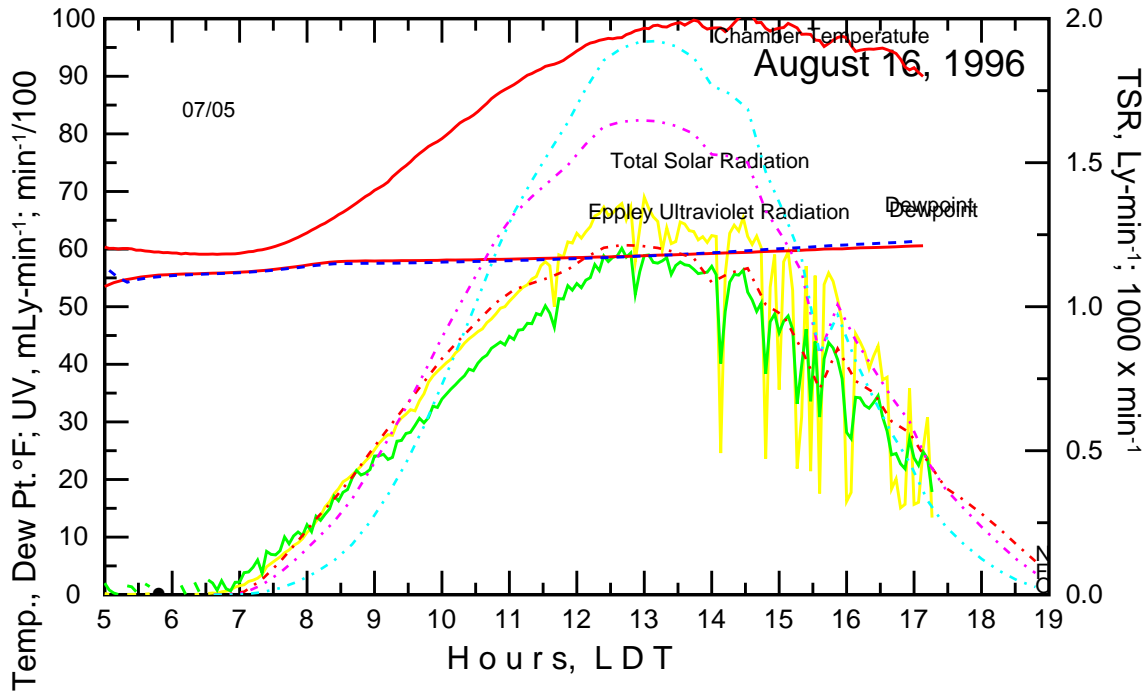

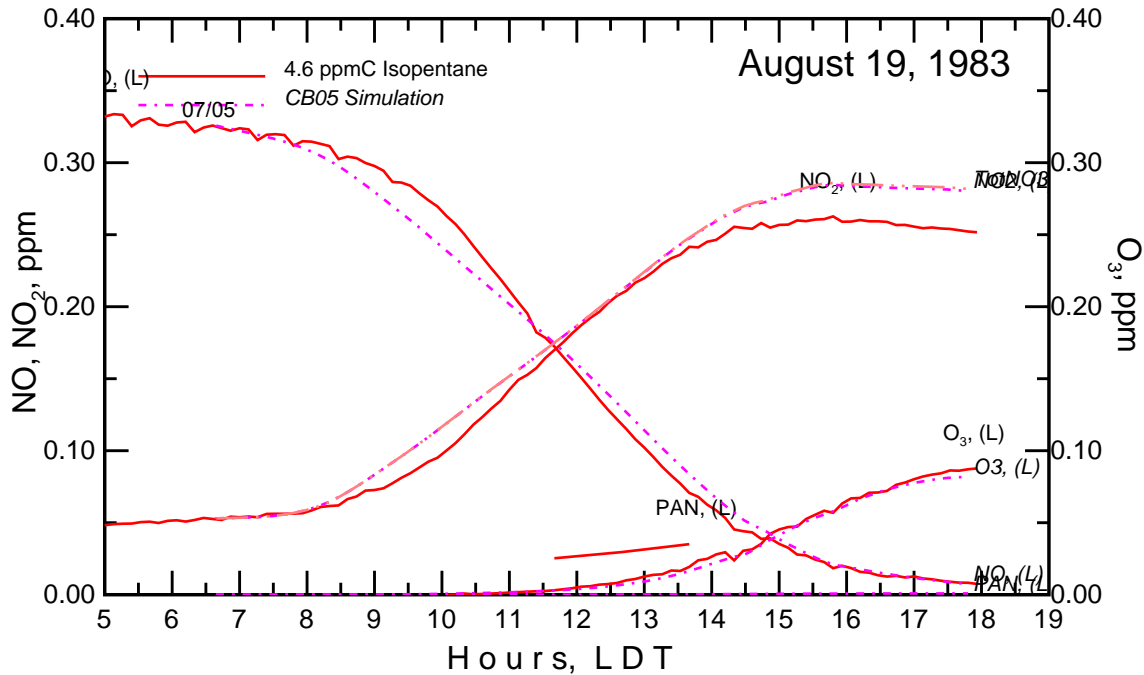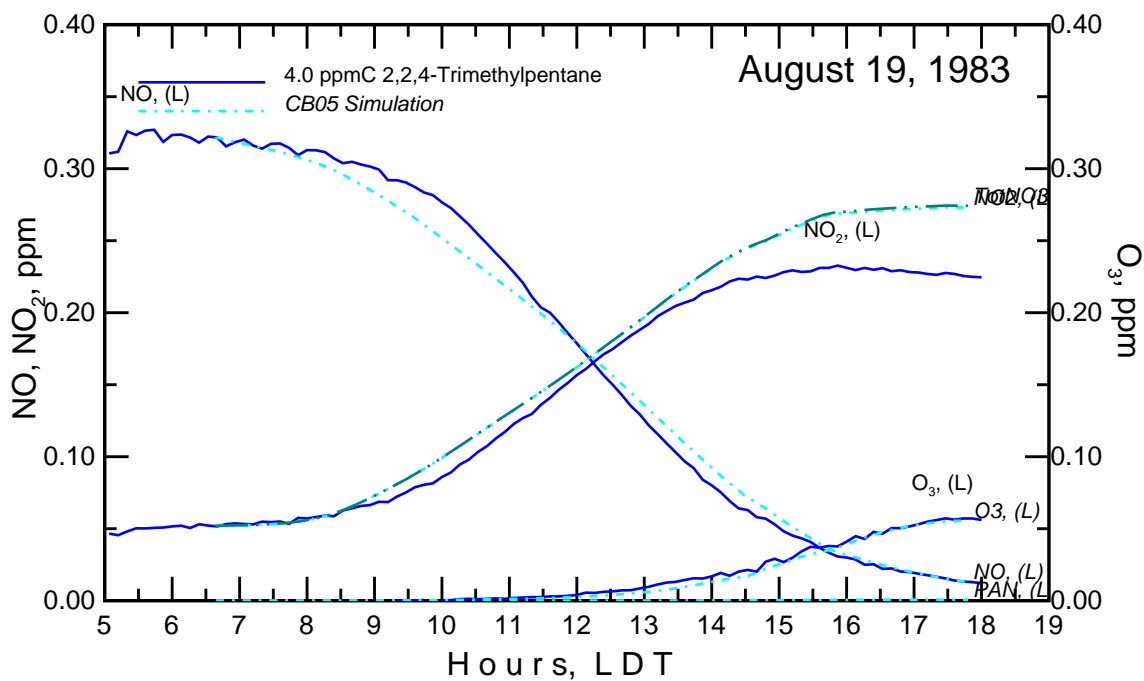

HC Reactivity at 0.37 NO<sub>x</sub>

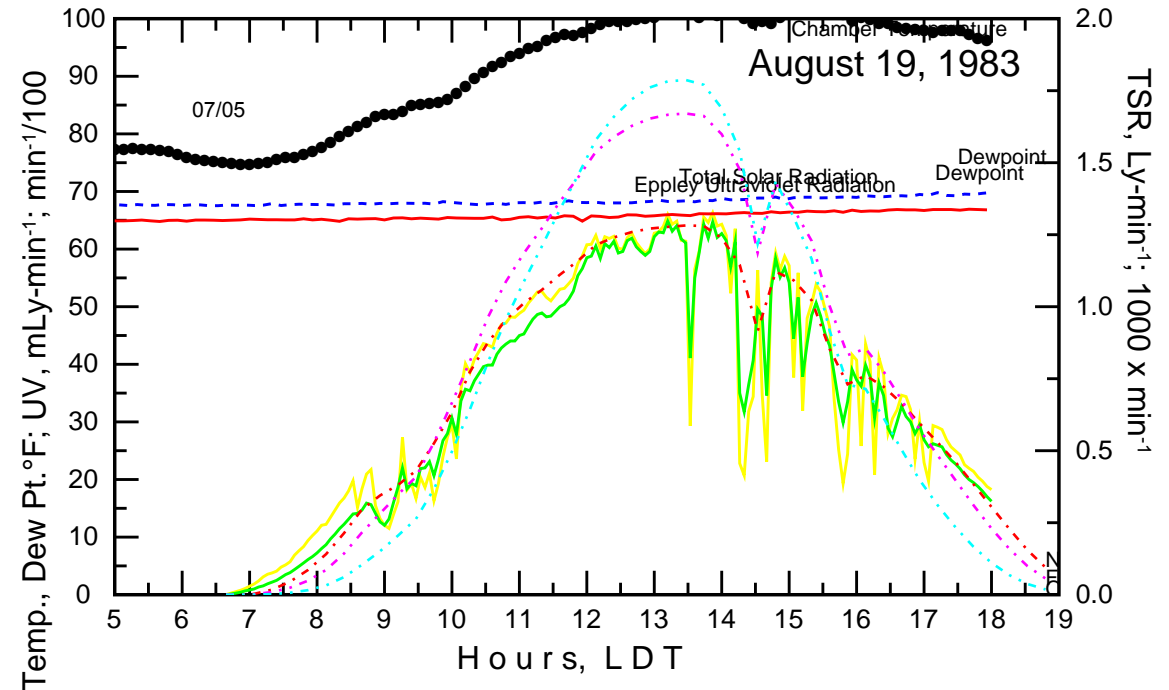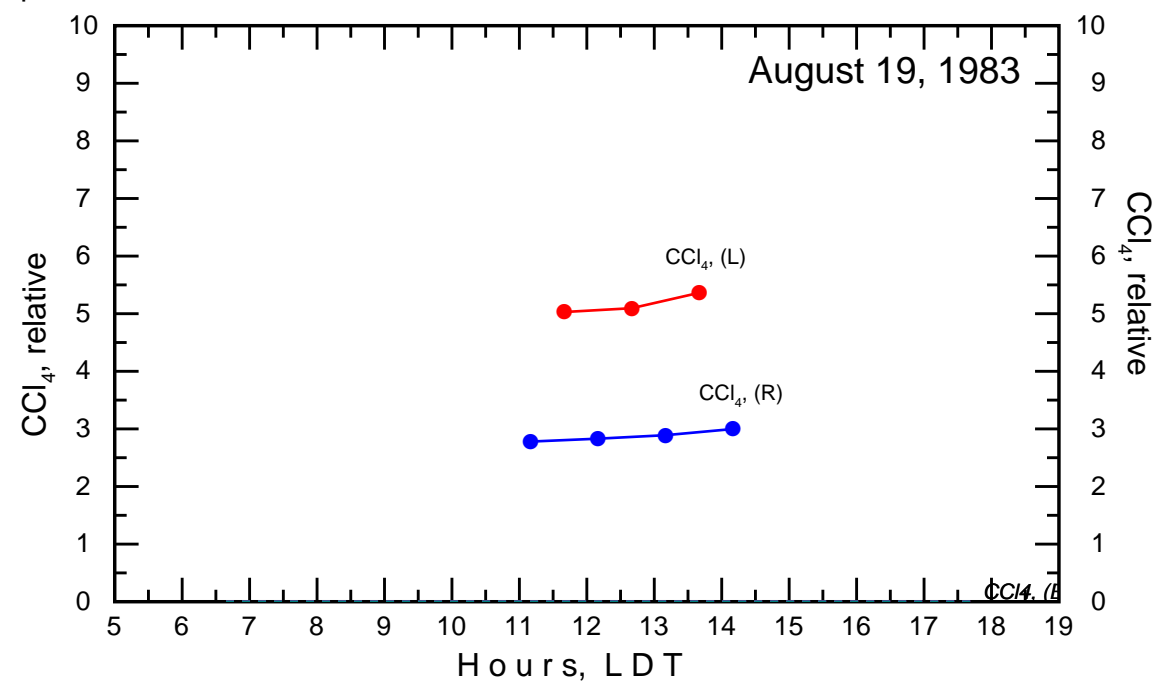

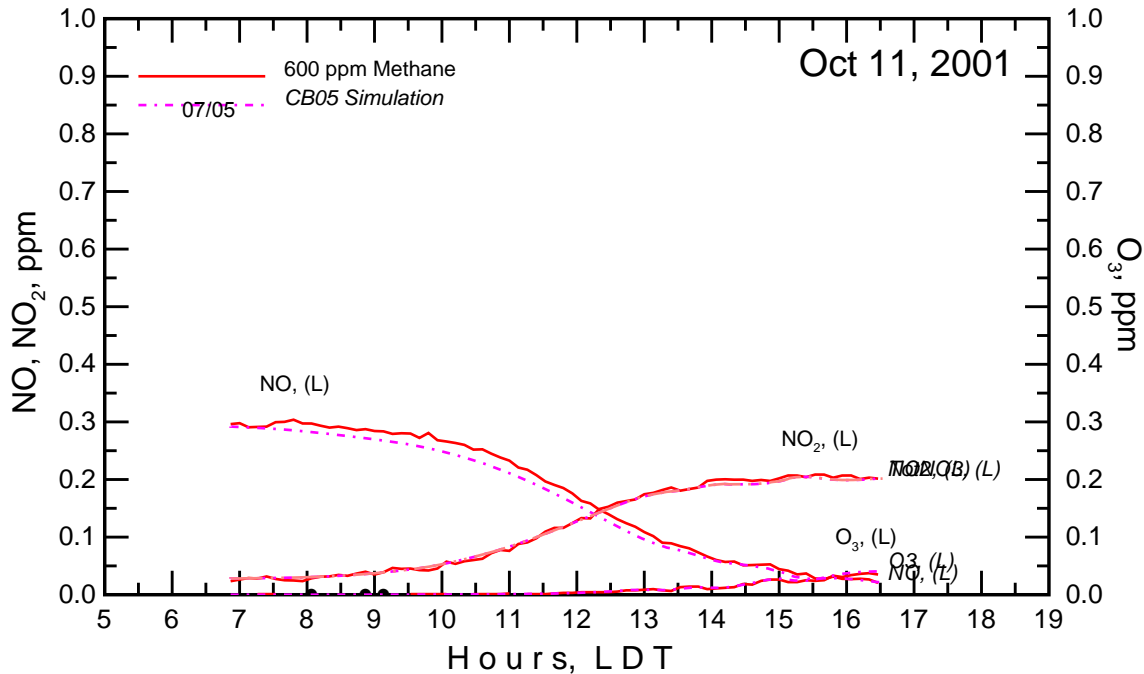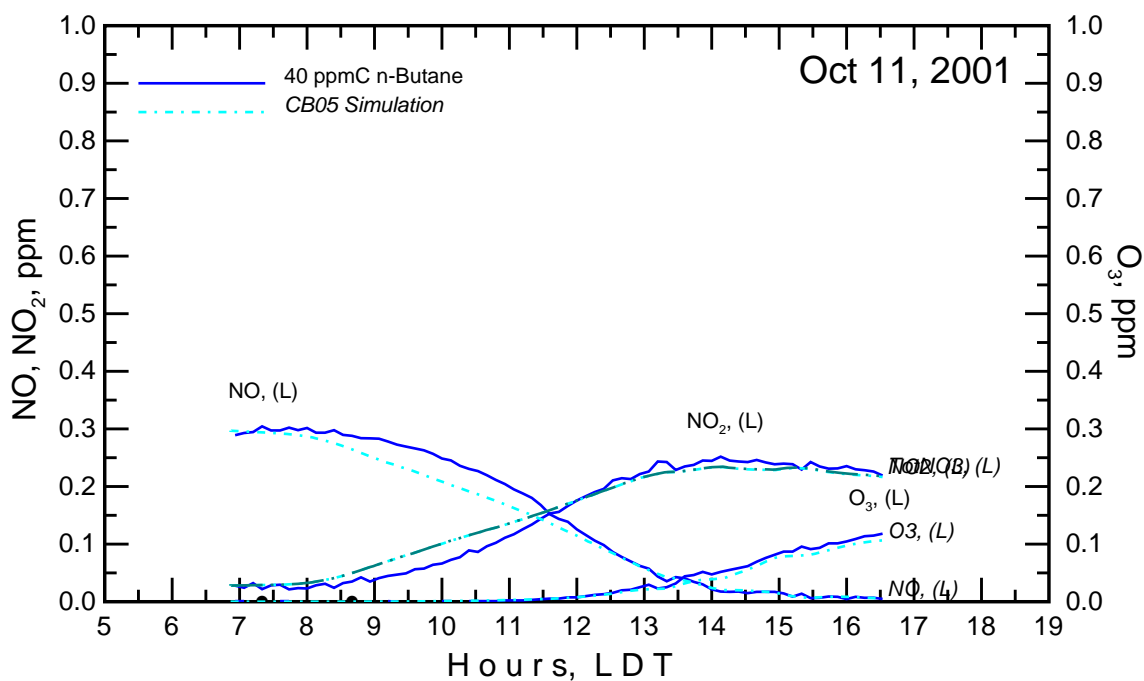

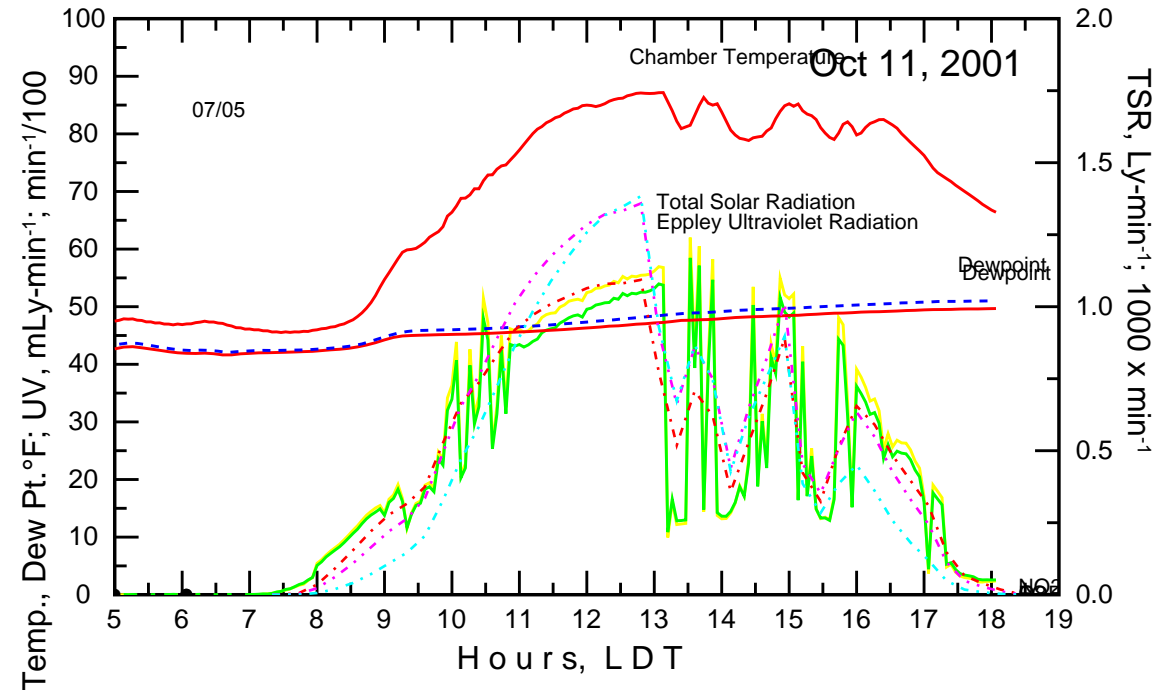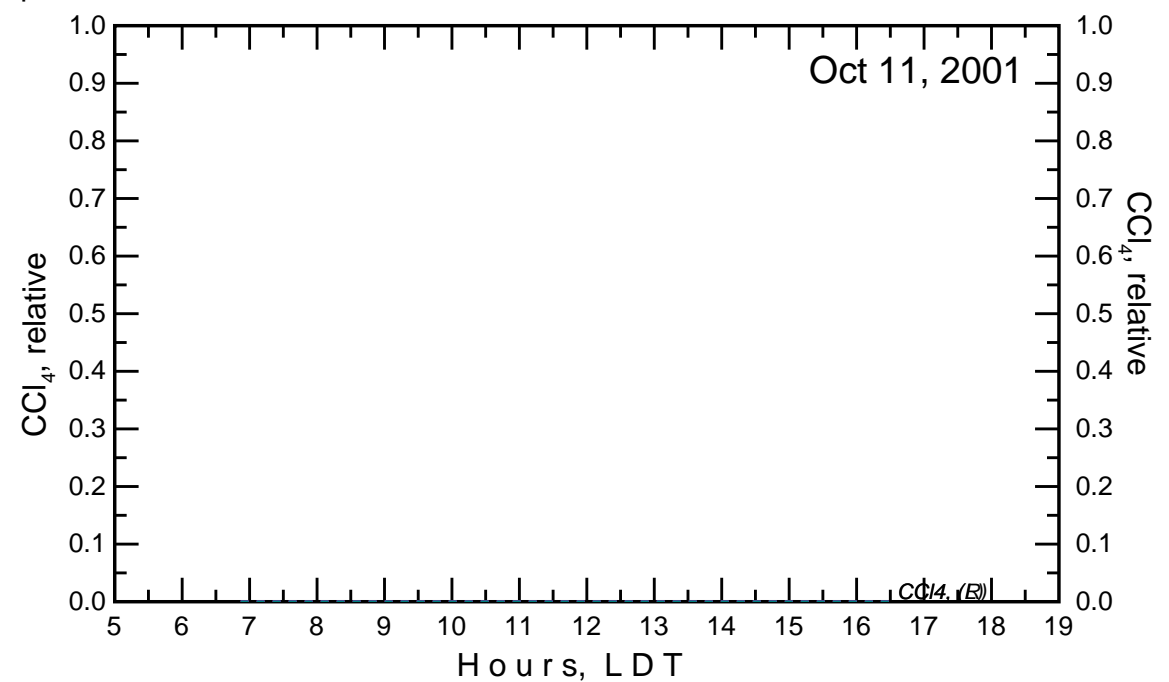

### **Aromatics (TOL and XYL)**

AU 01 83  
AU 03 95  
AU 17 88  
AU 22 97  
AU 30 95  
ST 13 93  
ST 14 81  
ST 24 96

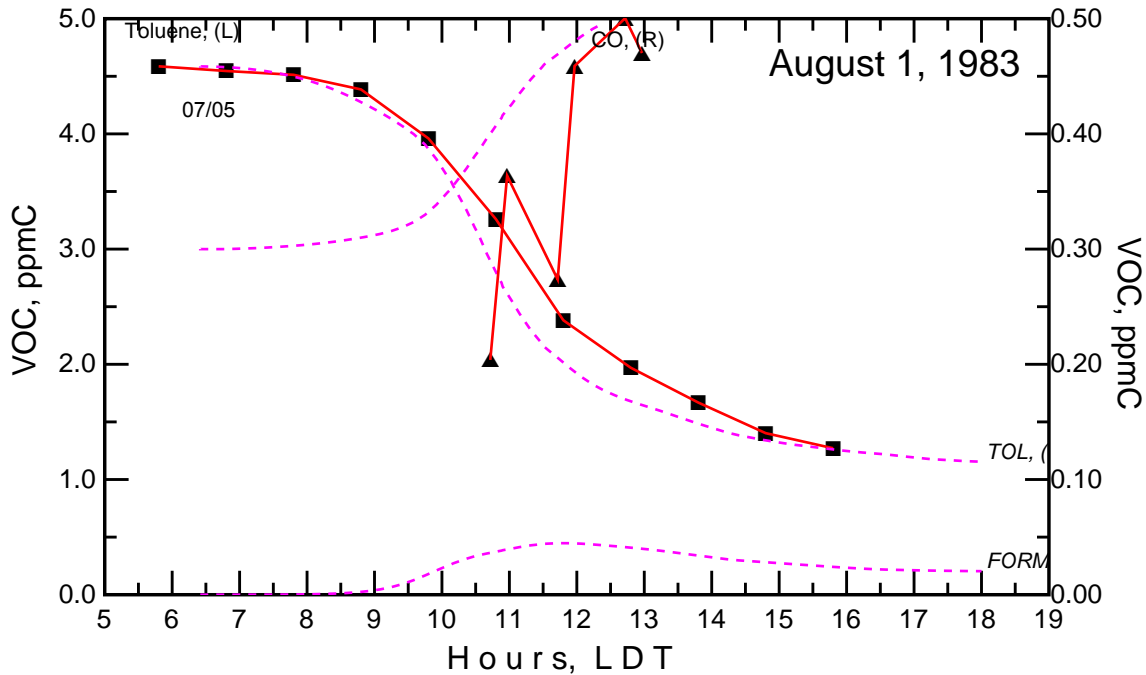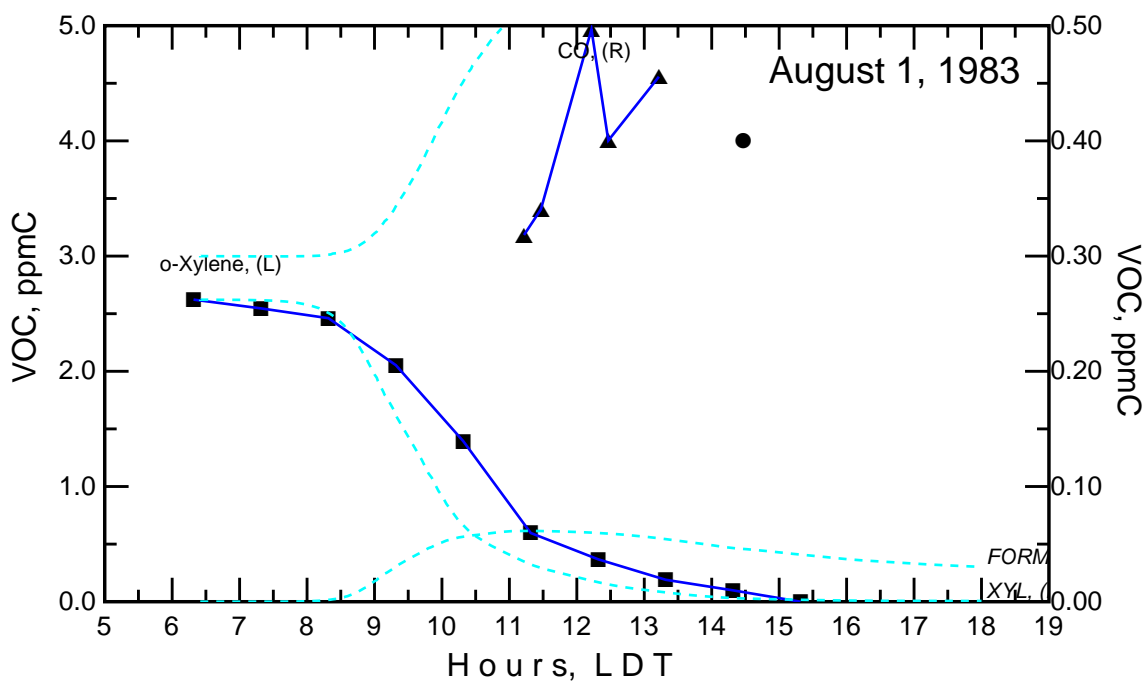

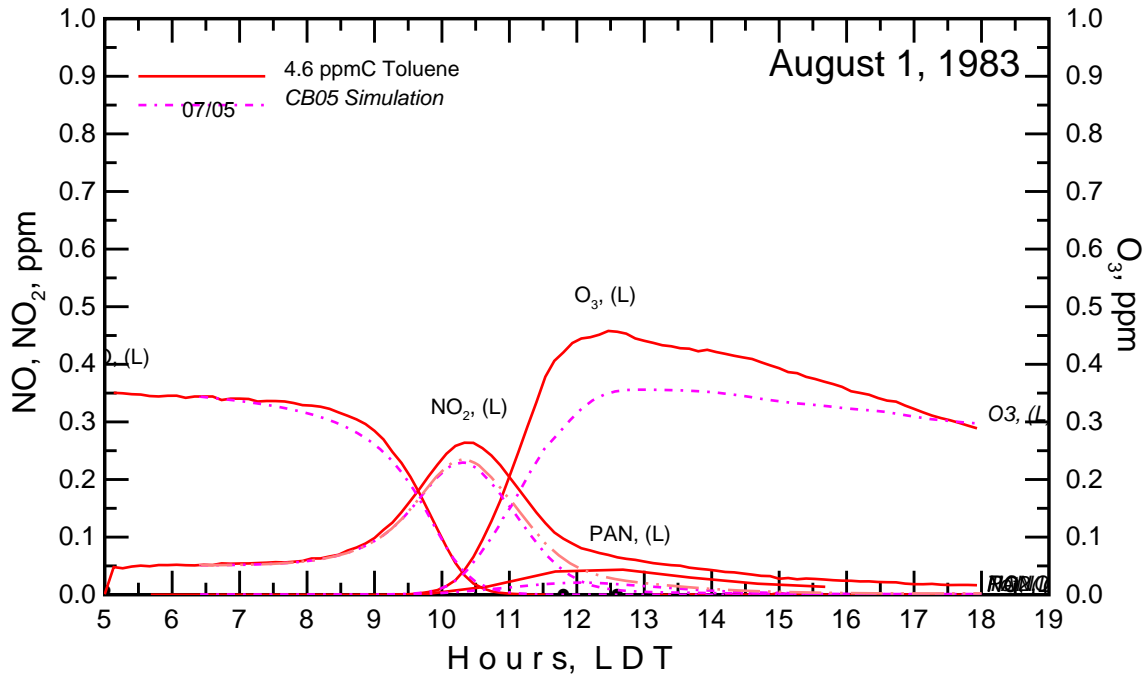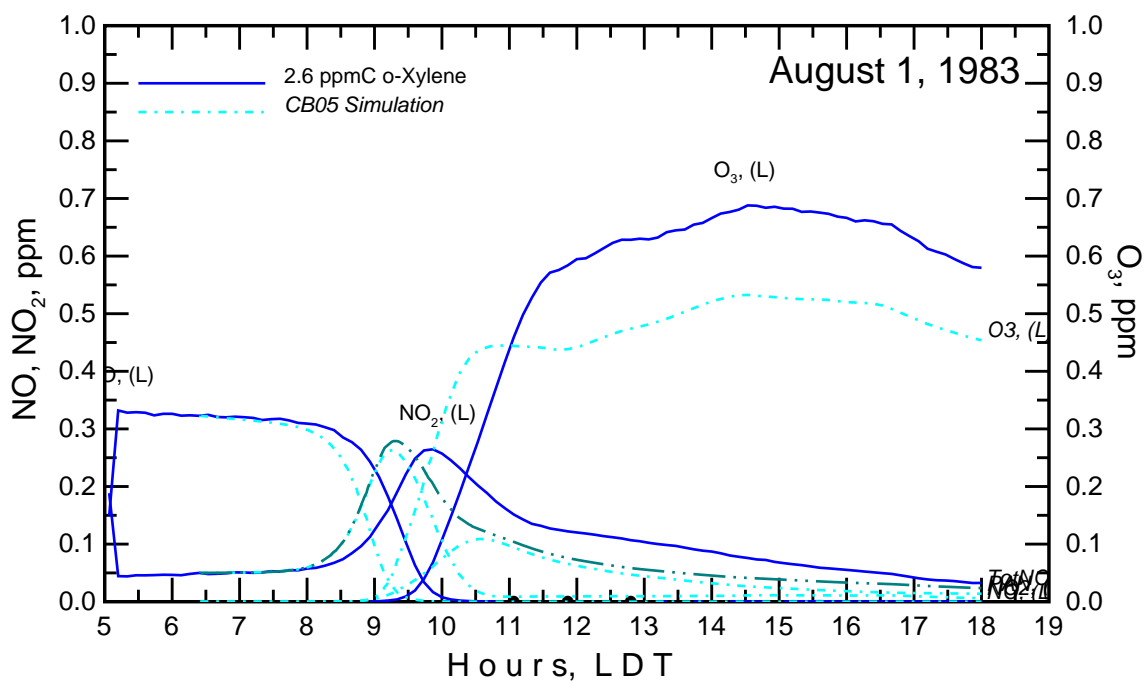

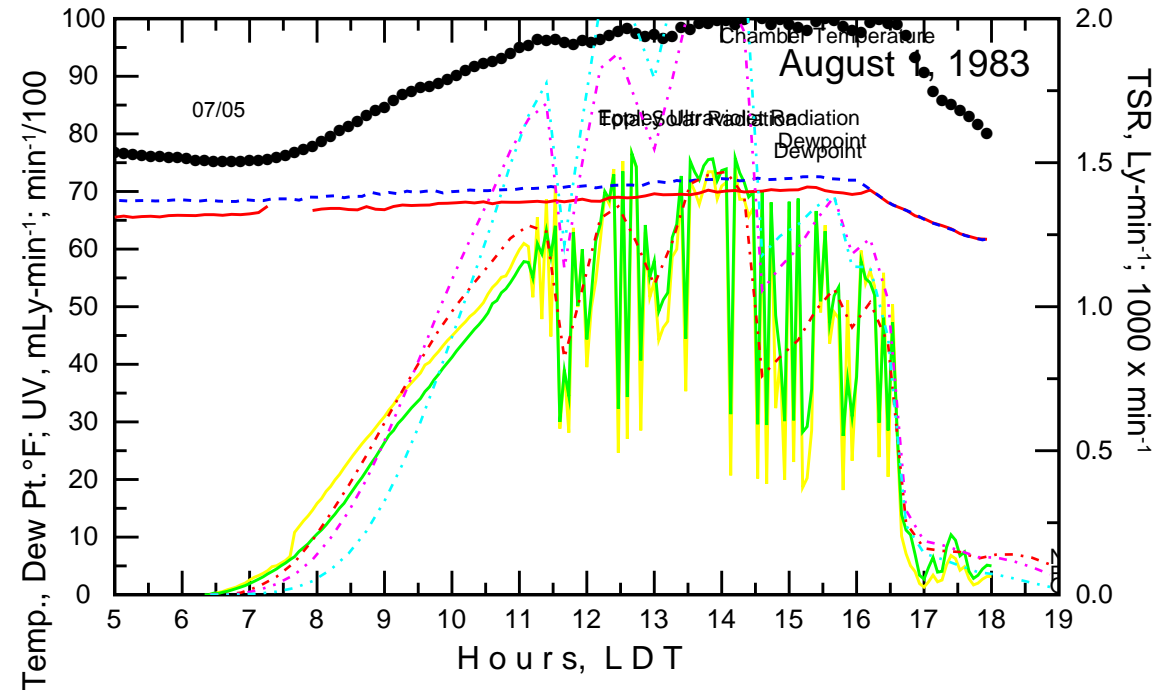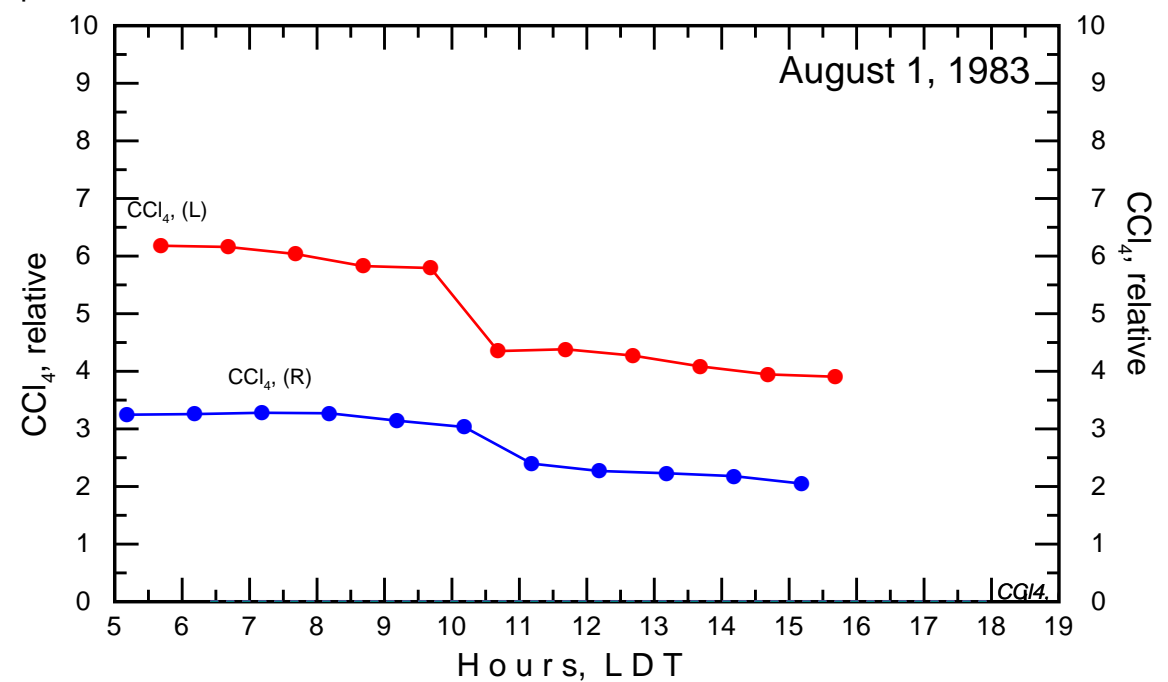

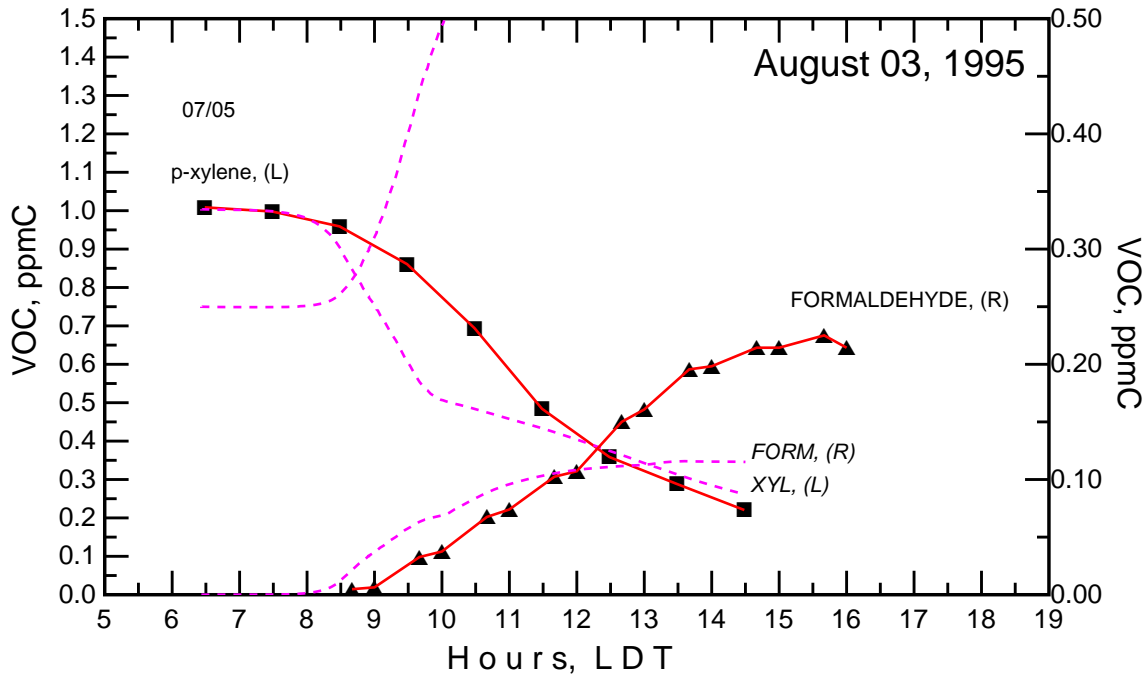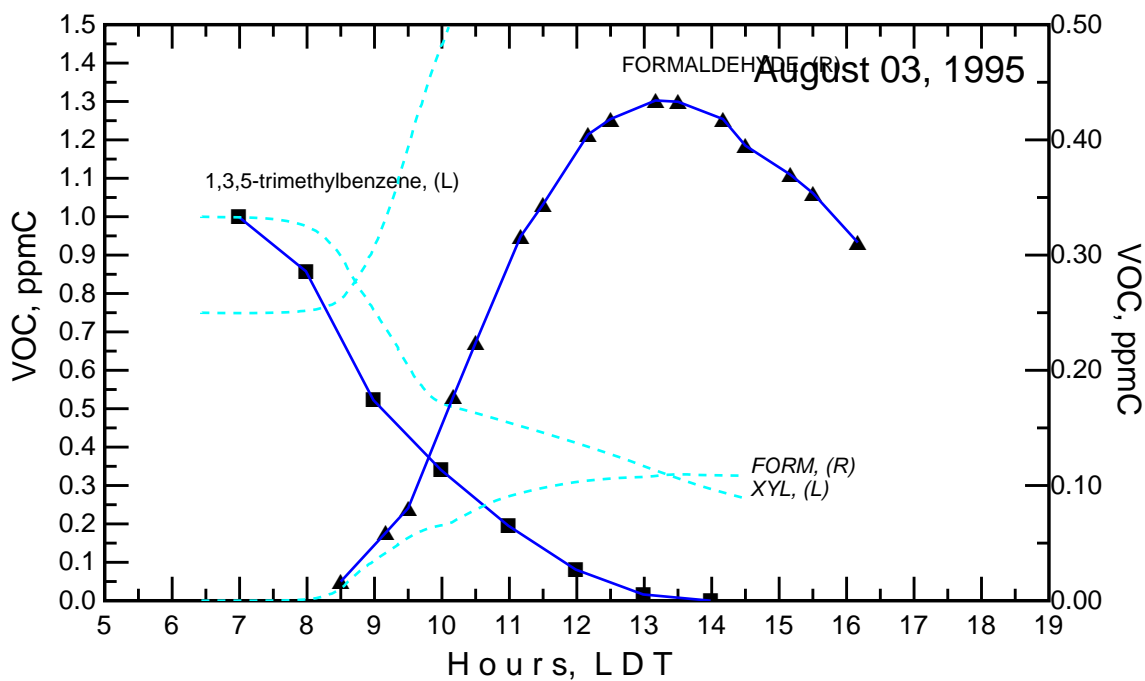

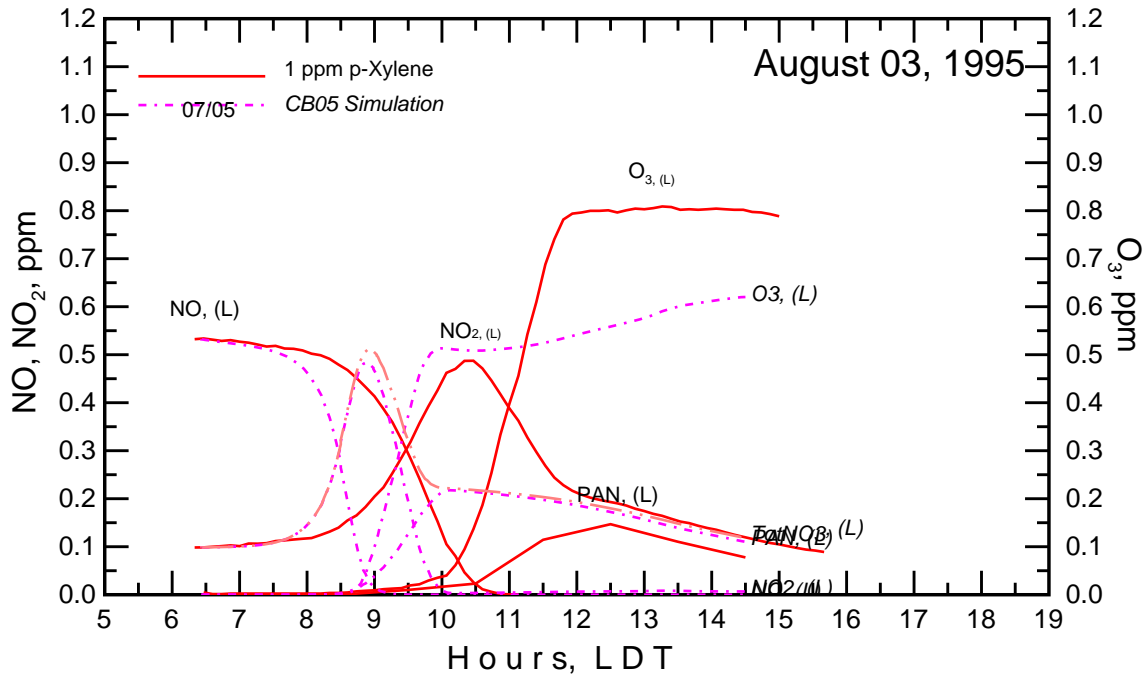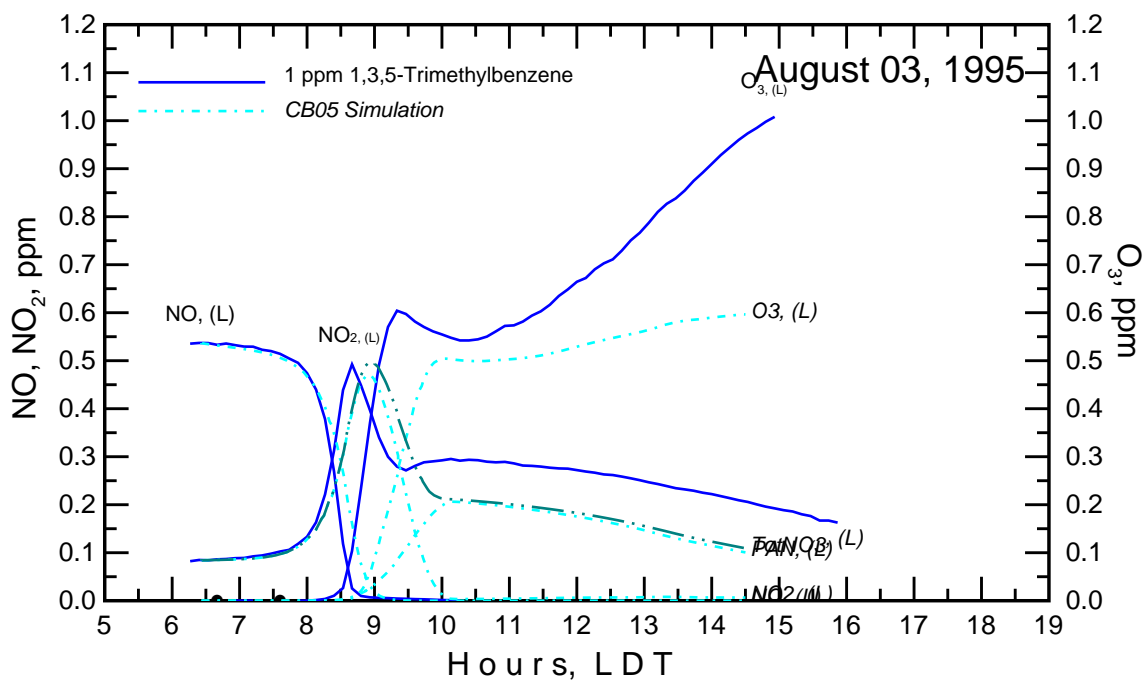

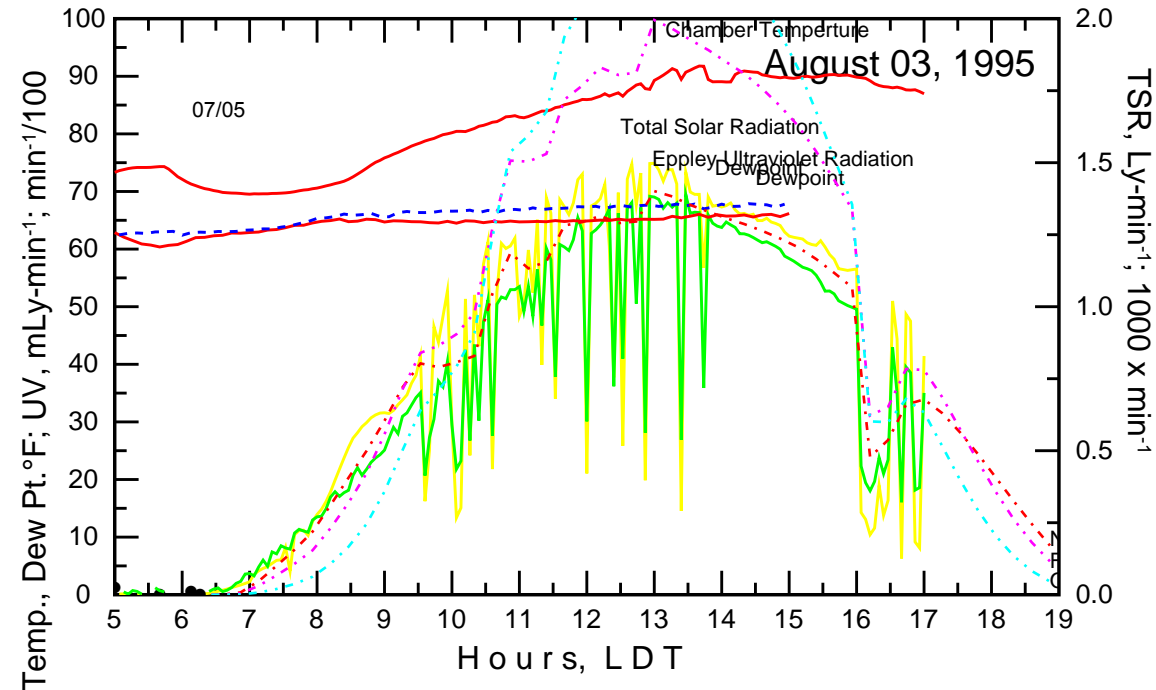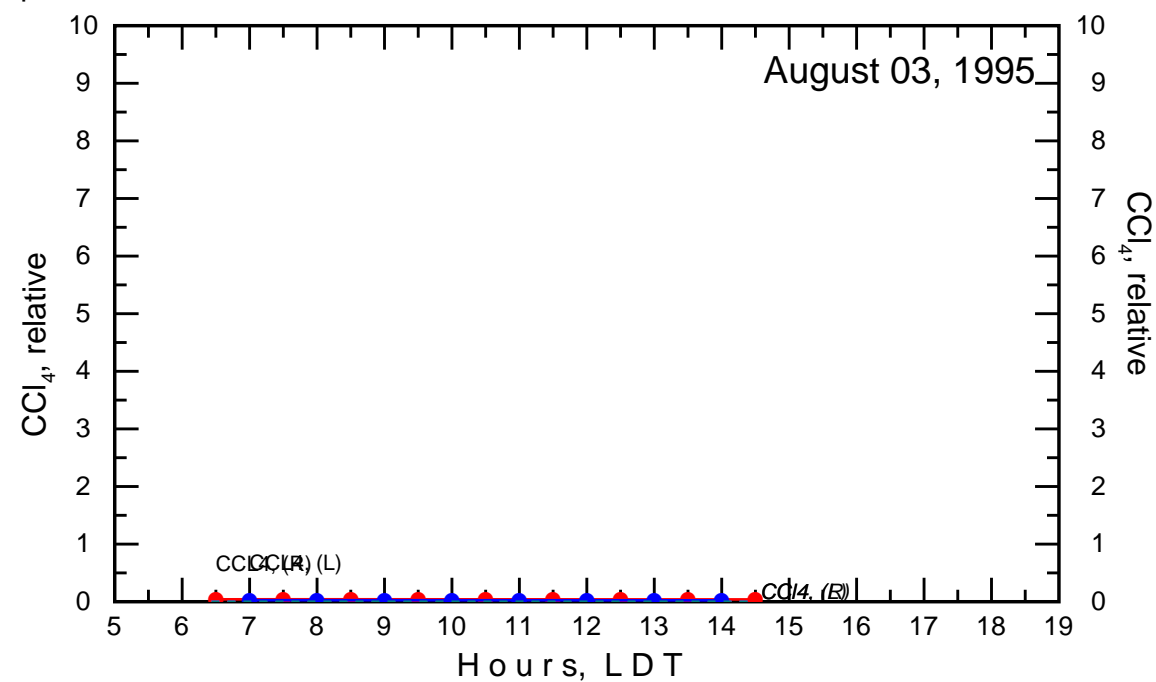

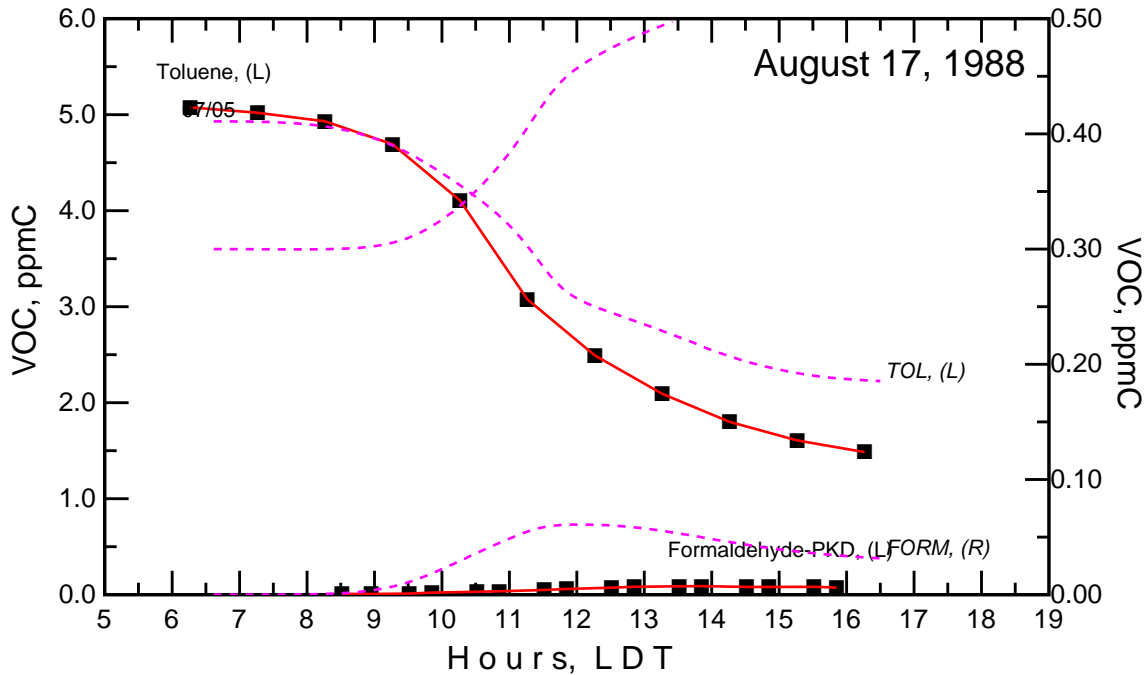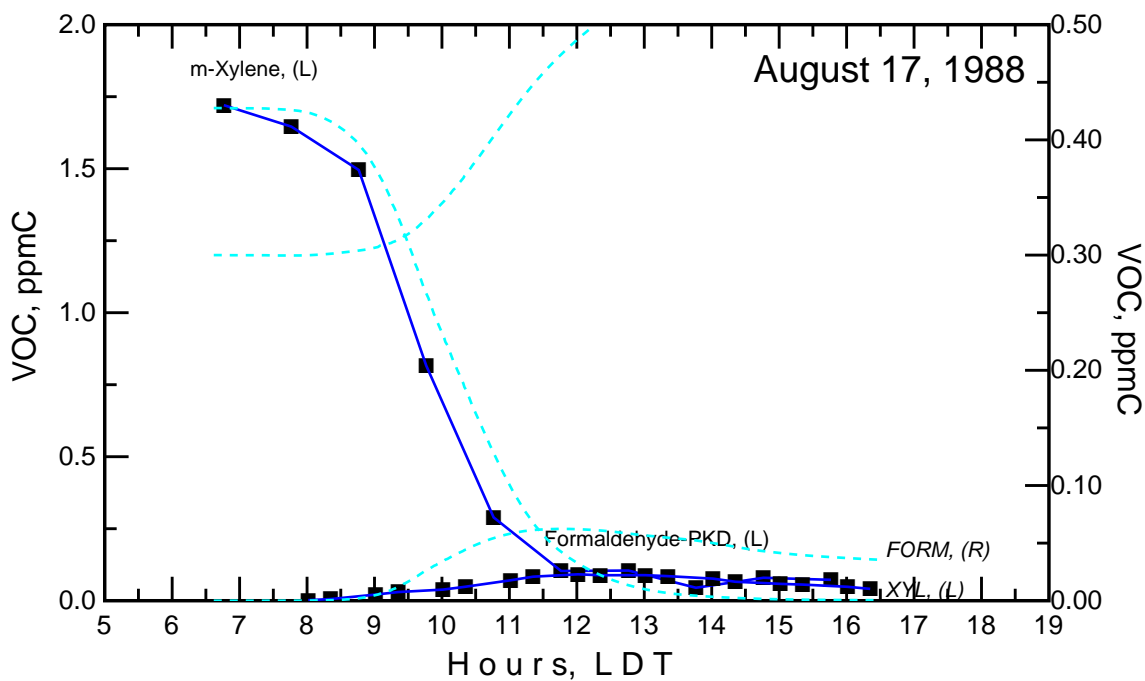

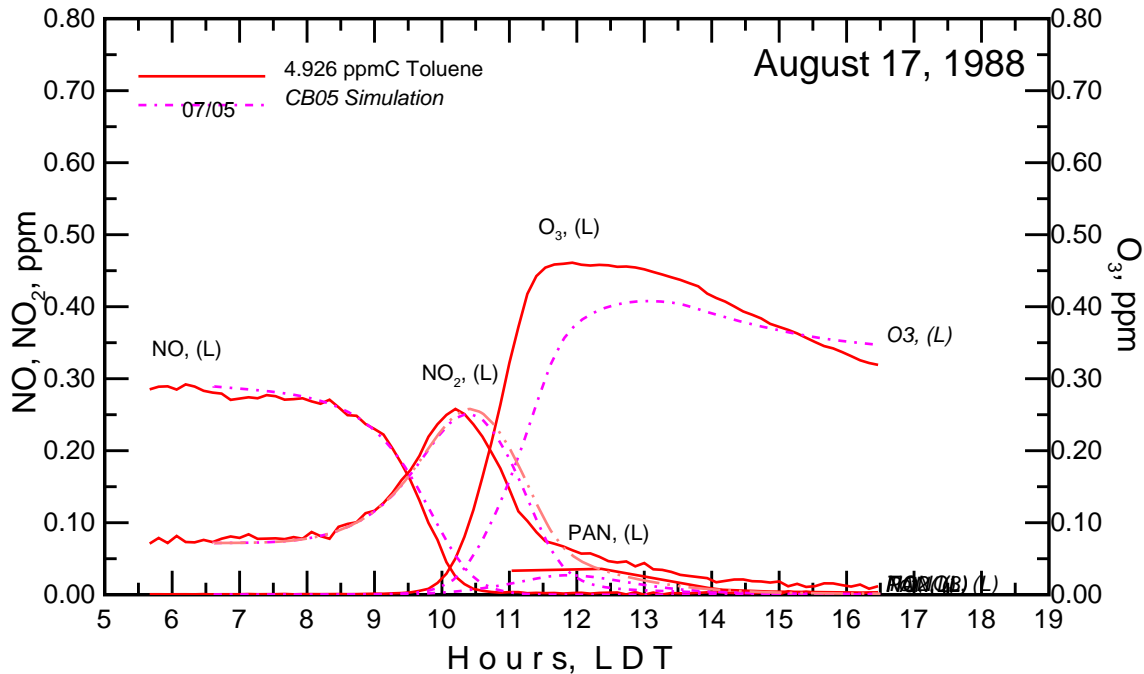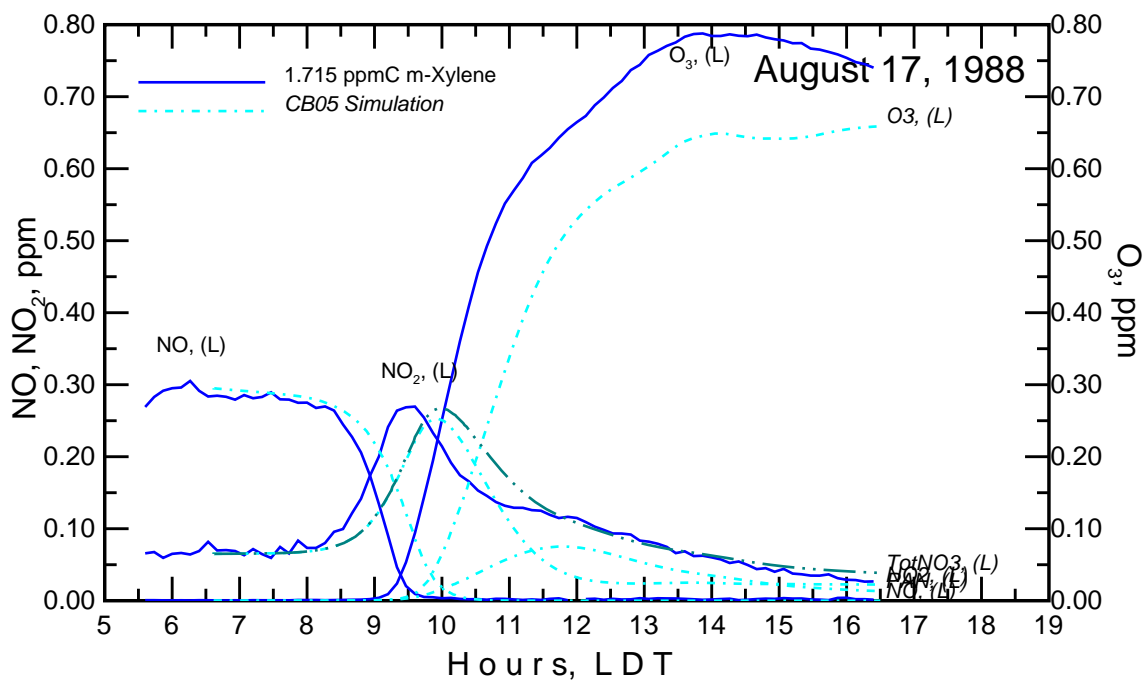

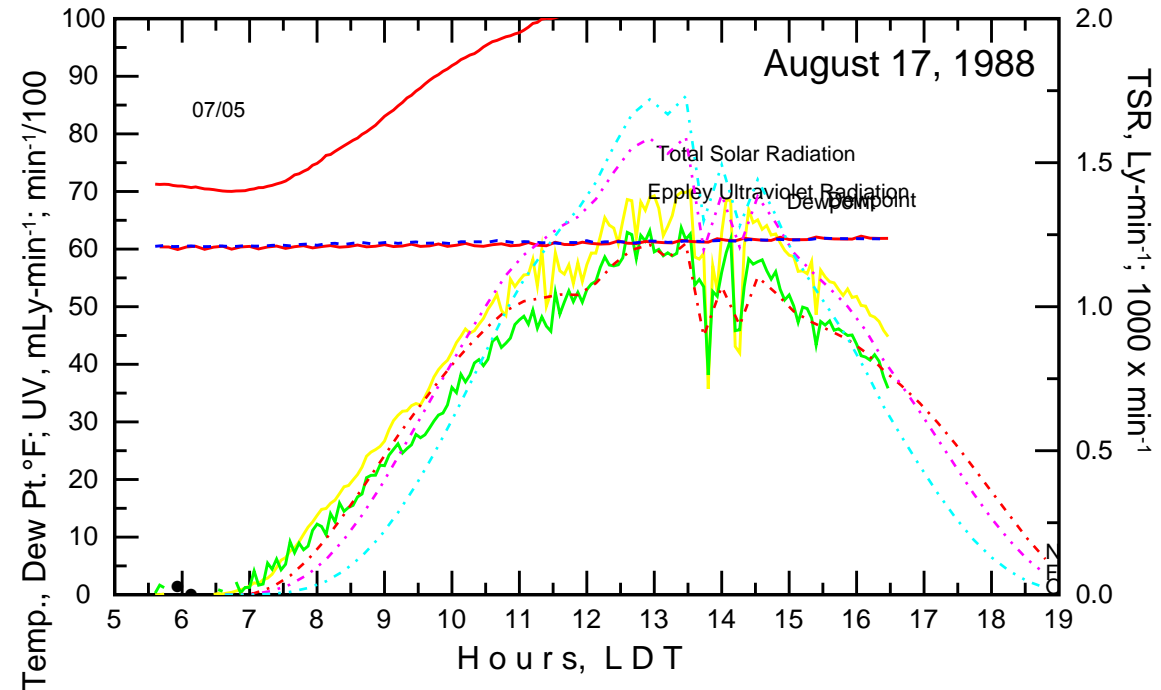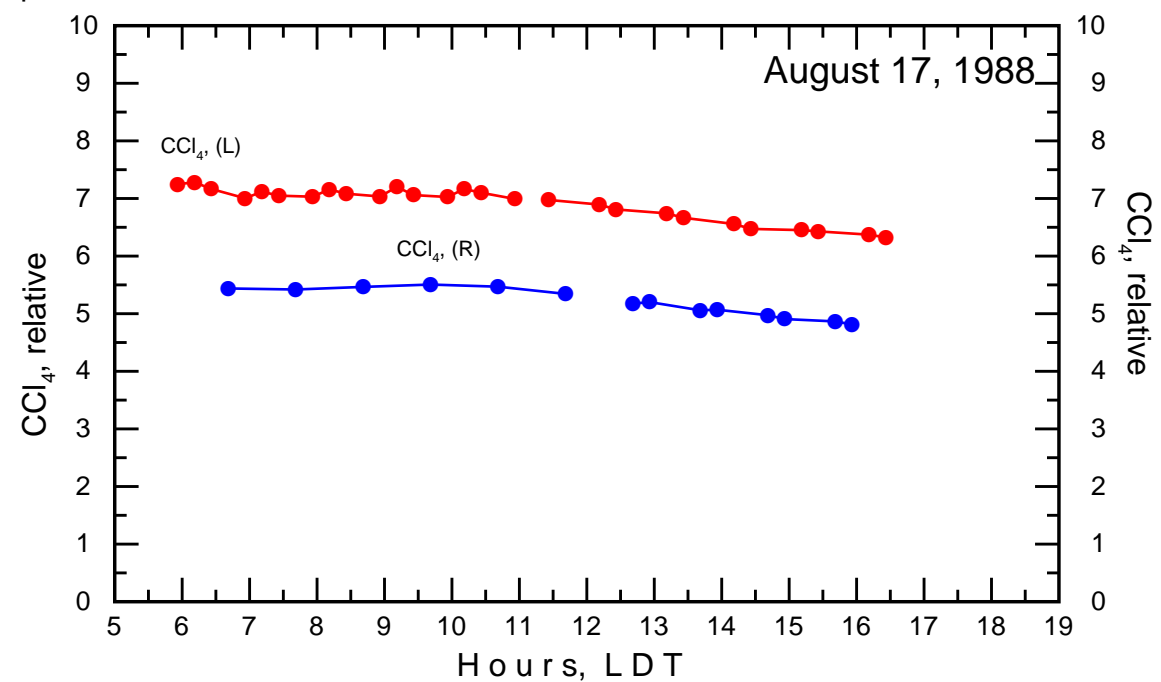

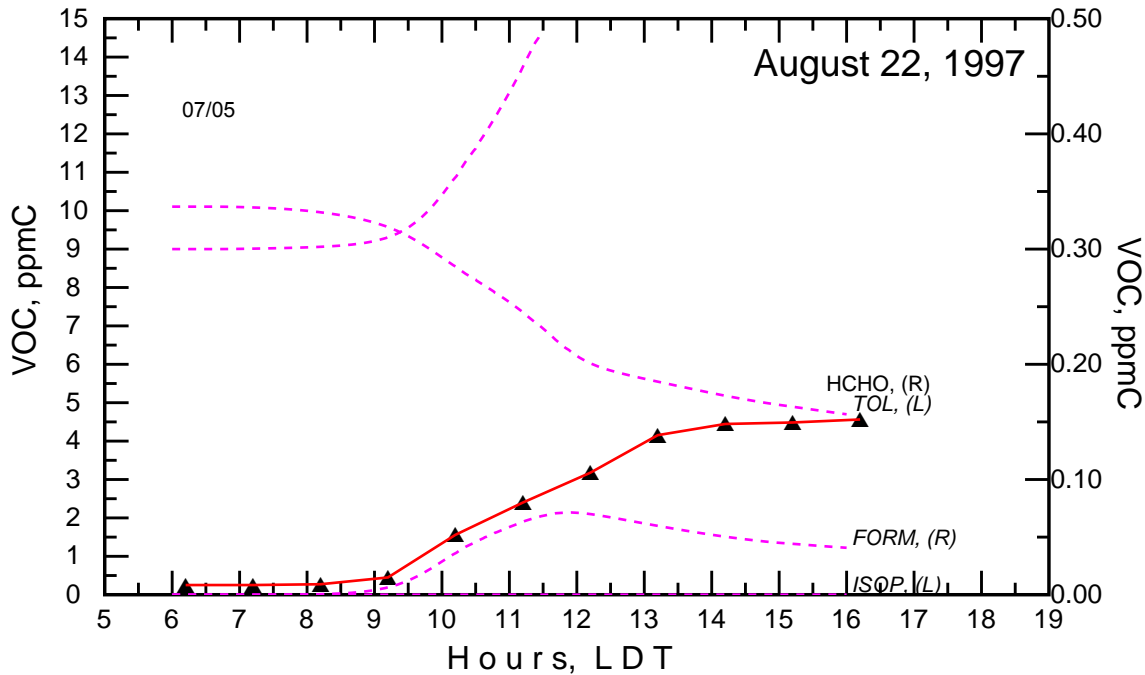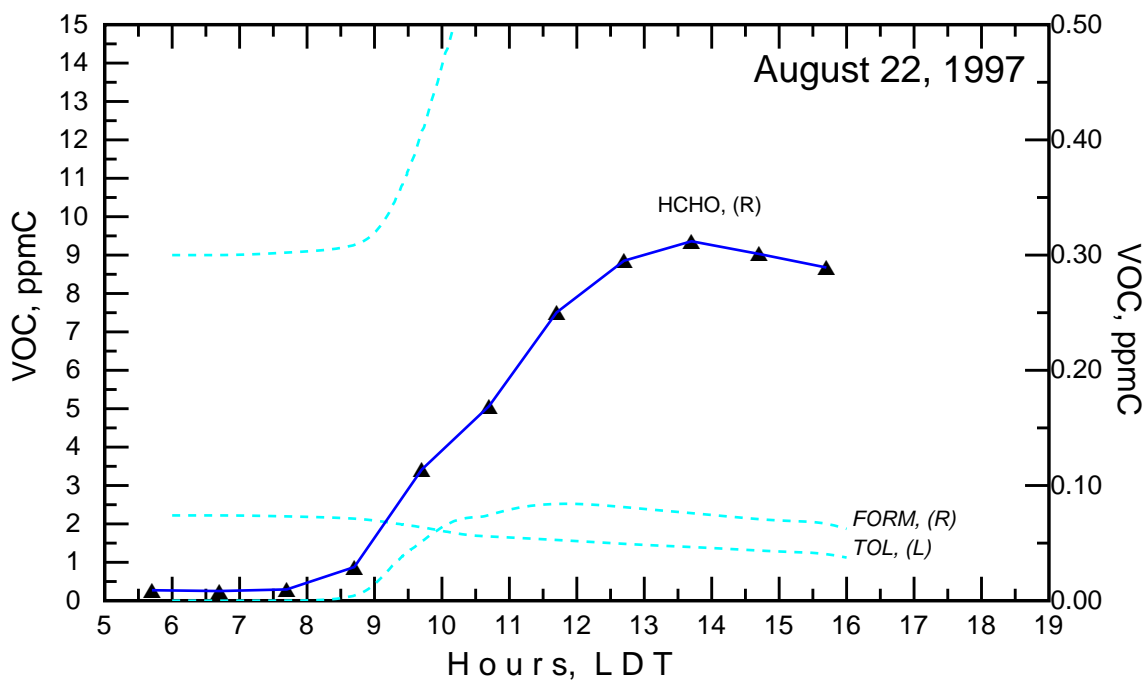

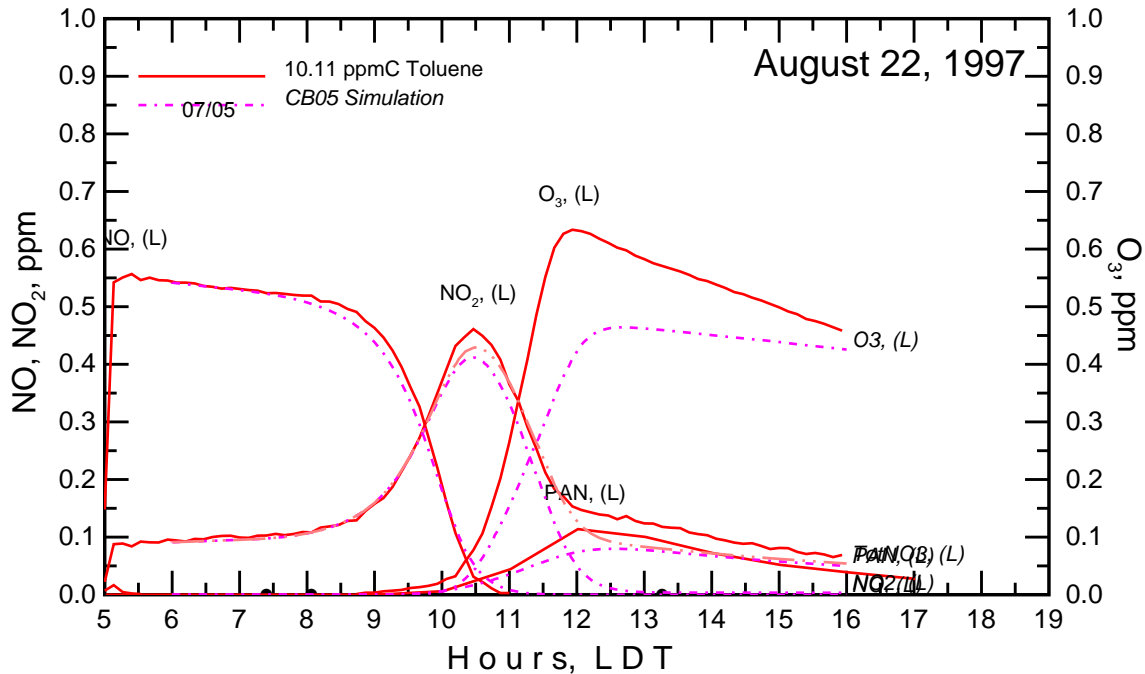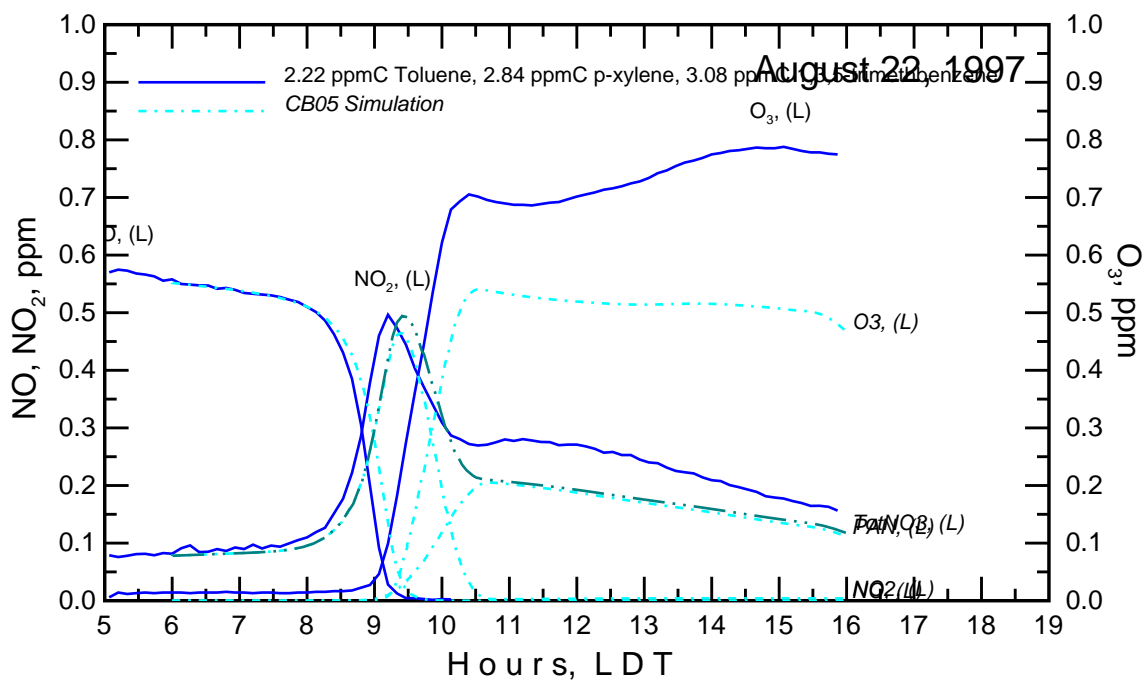

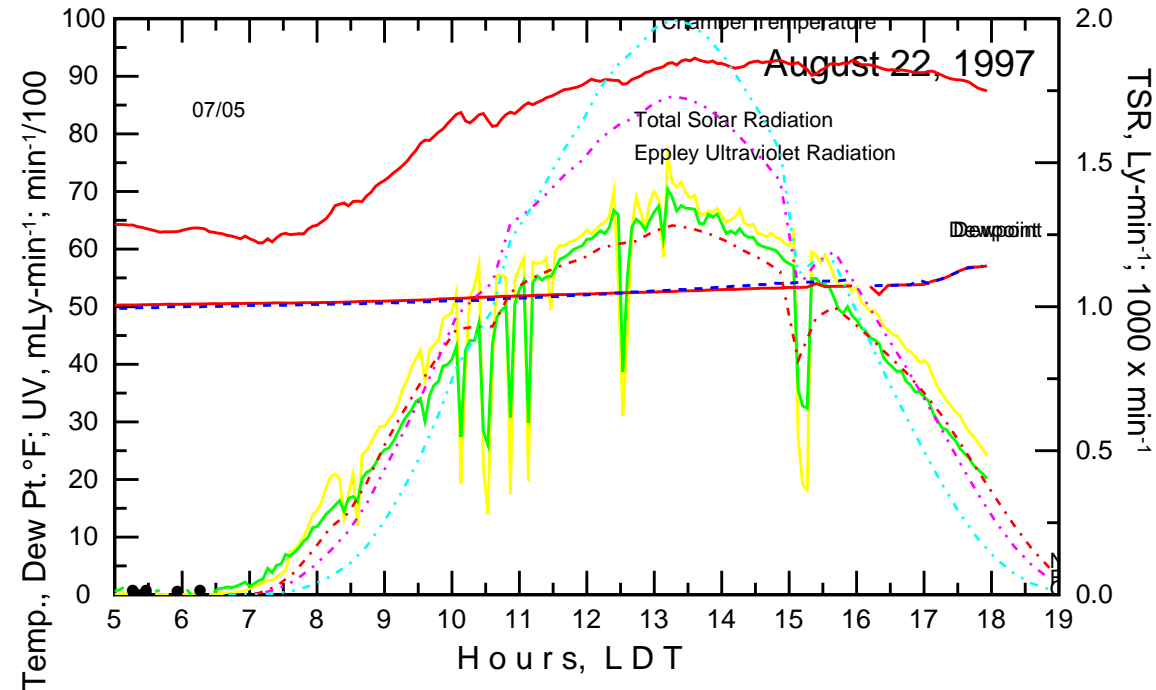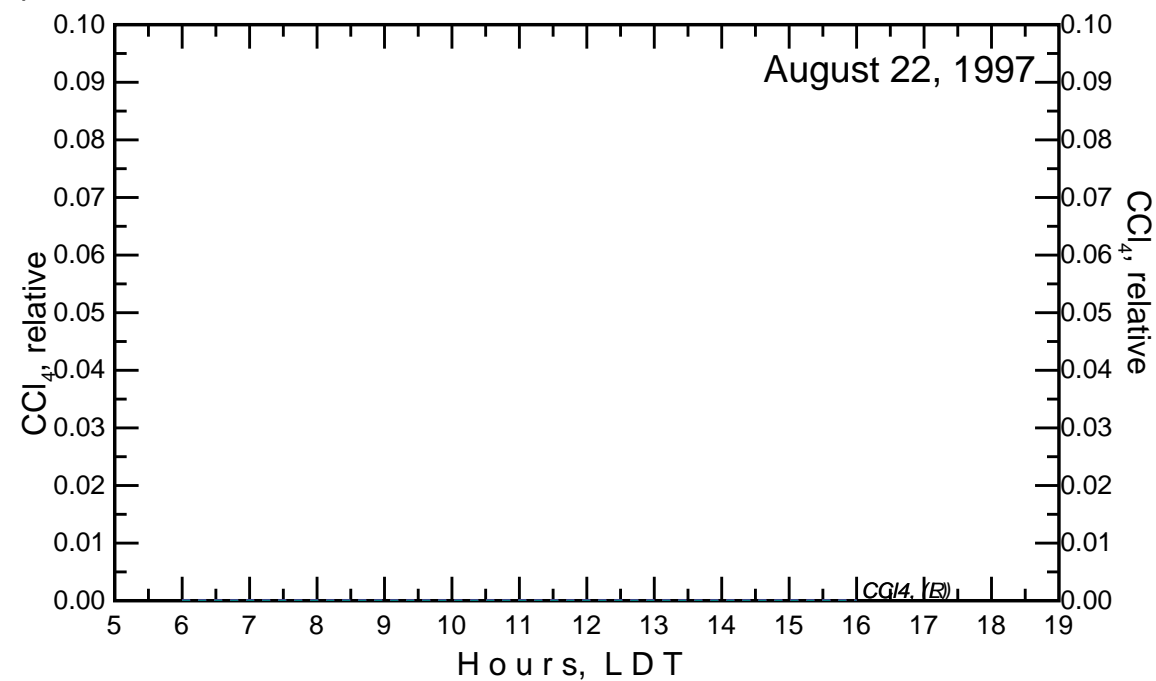

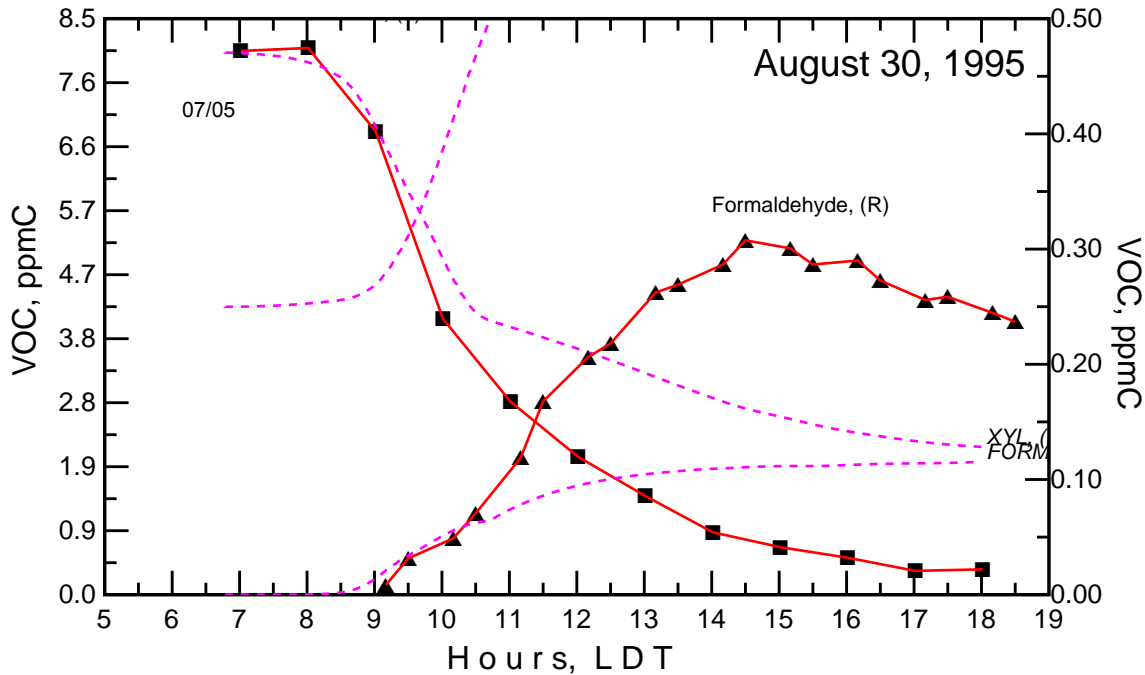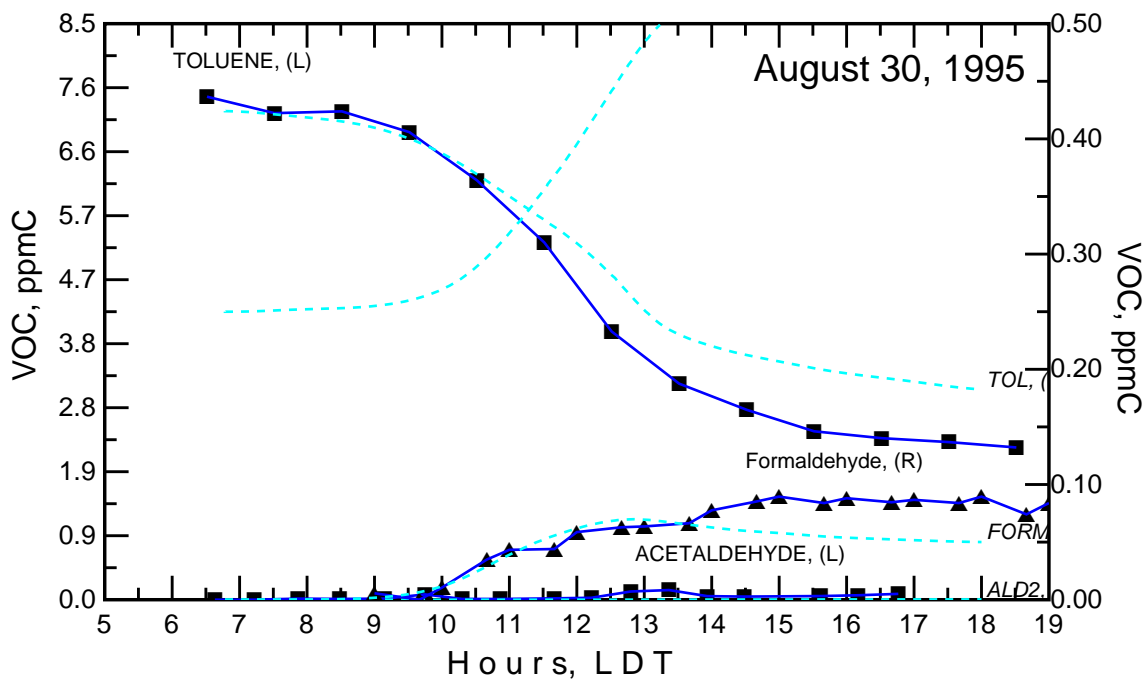

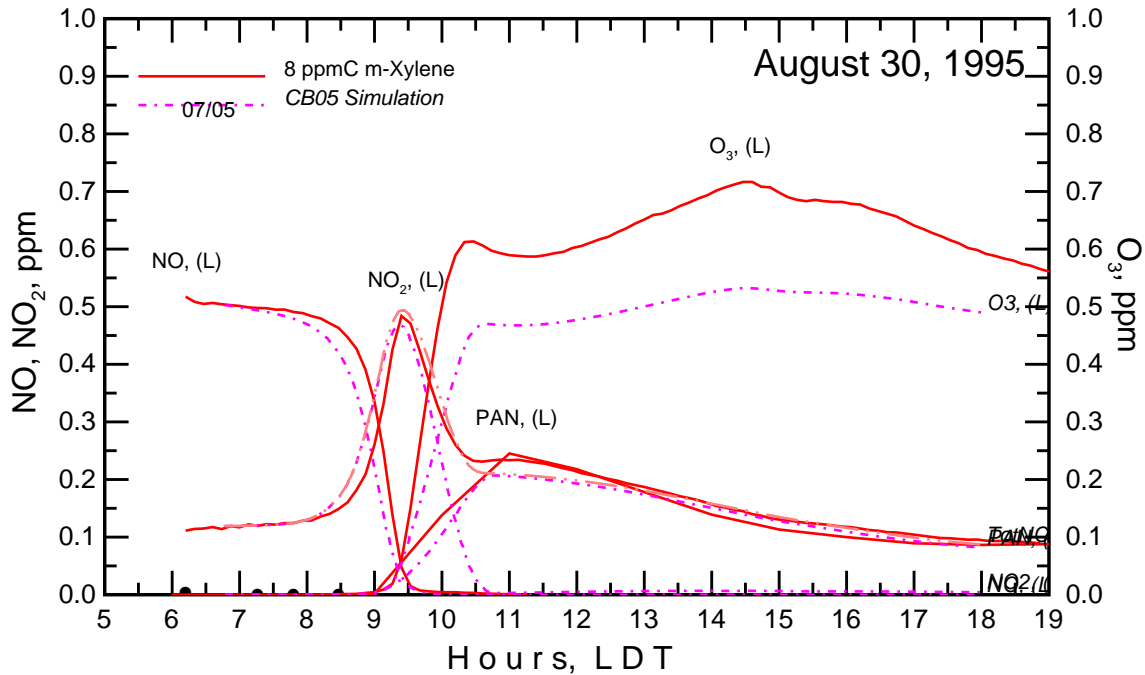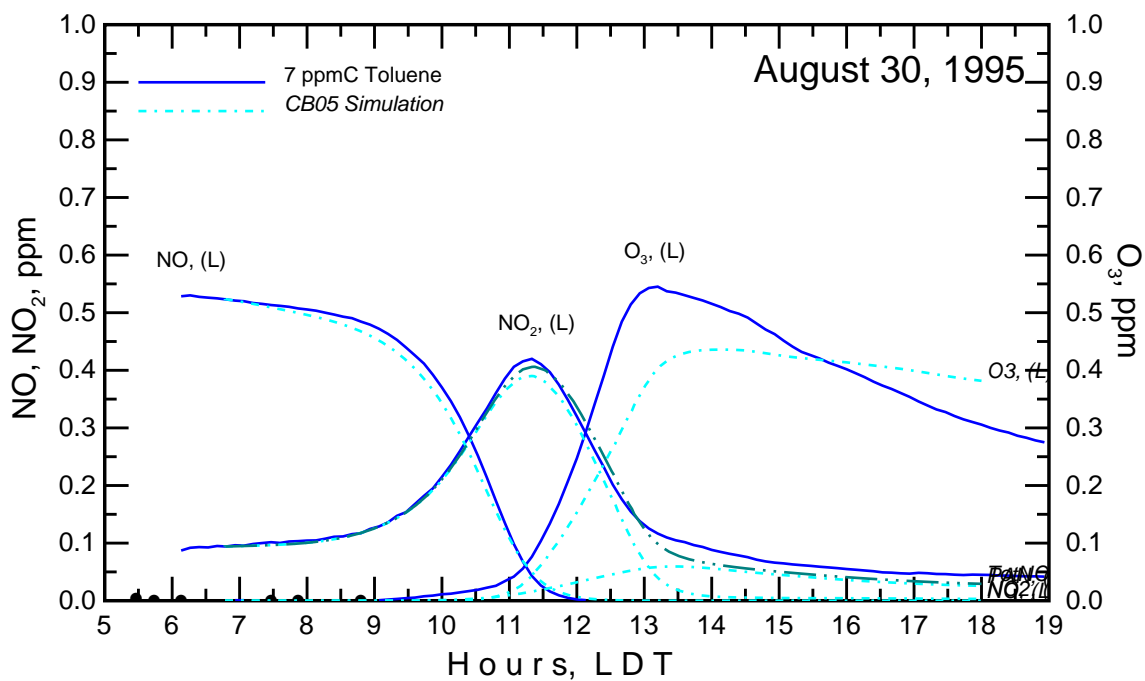

Toluene vs m-Xylene;

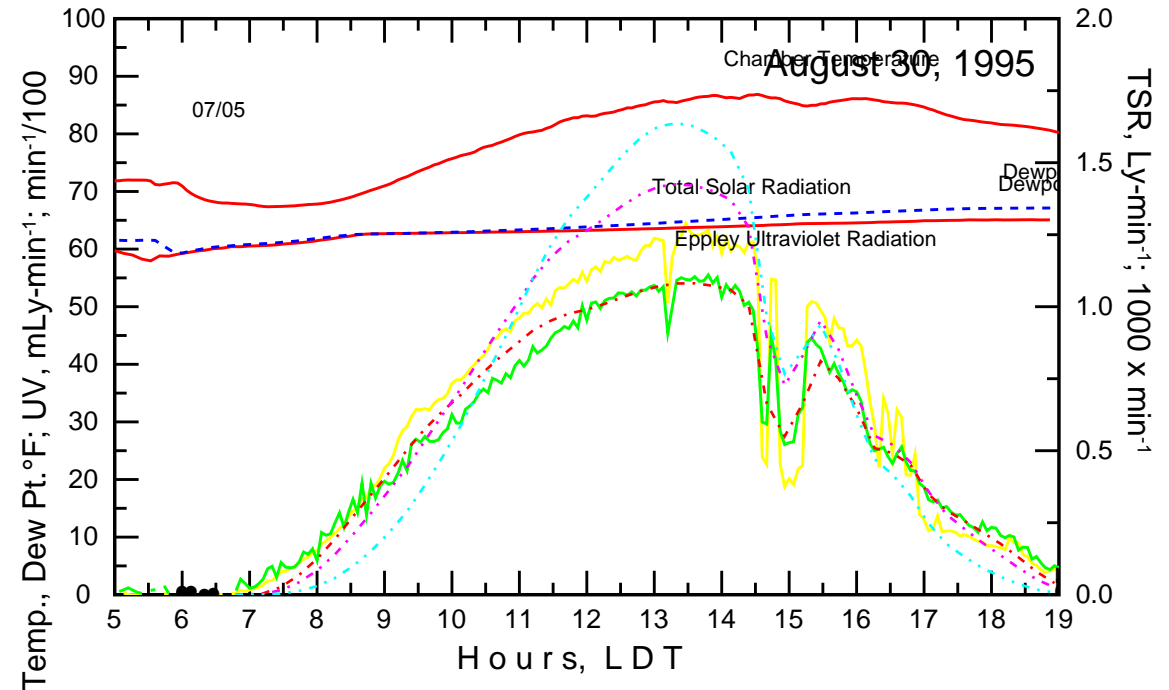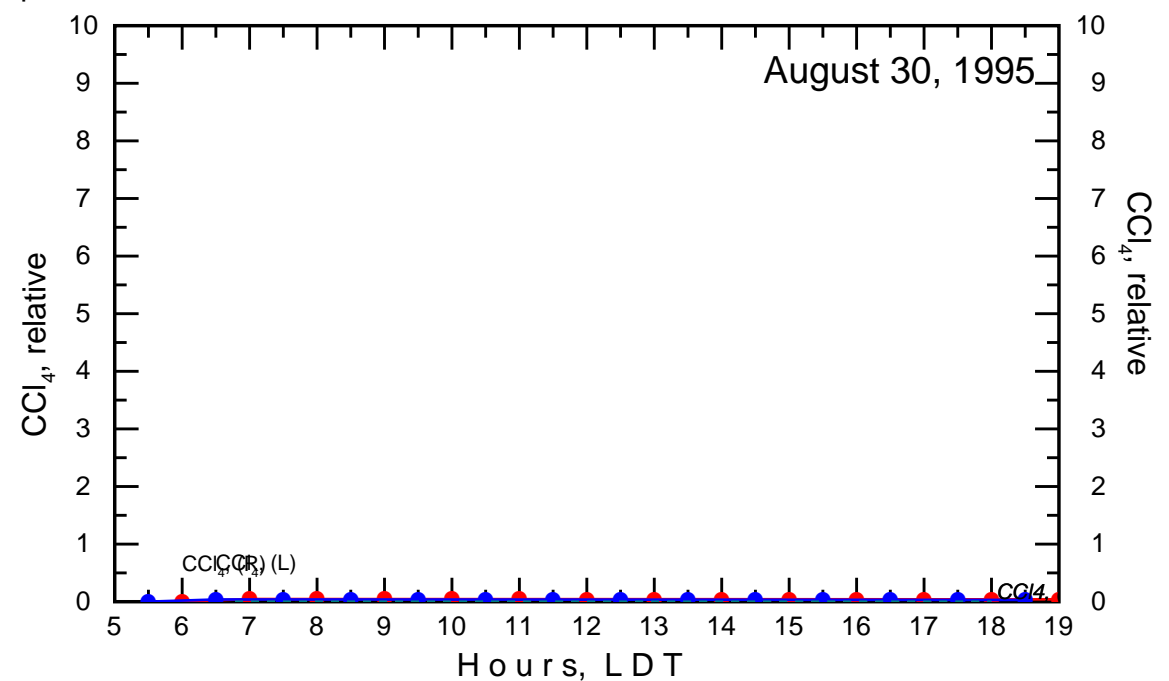

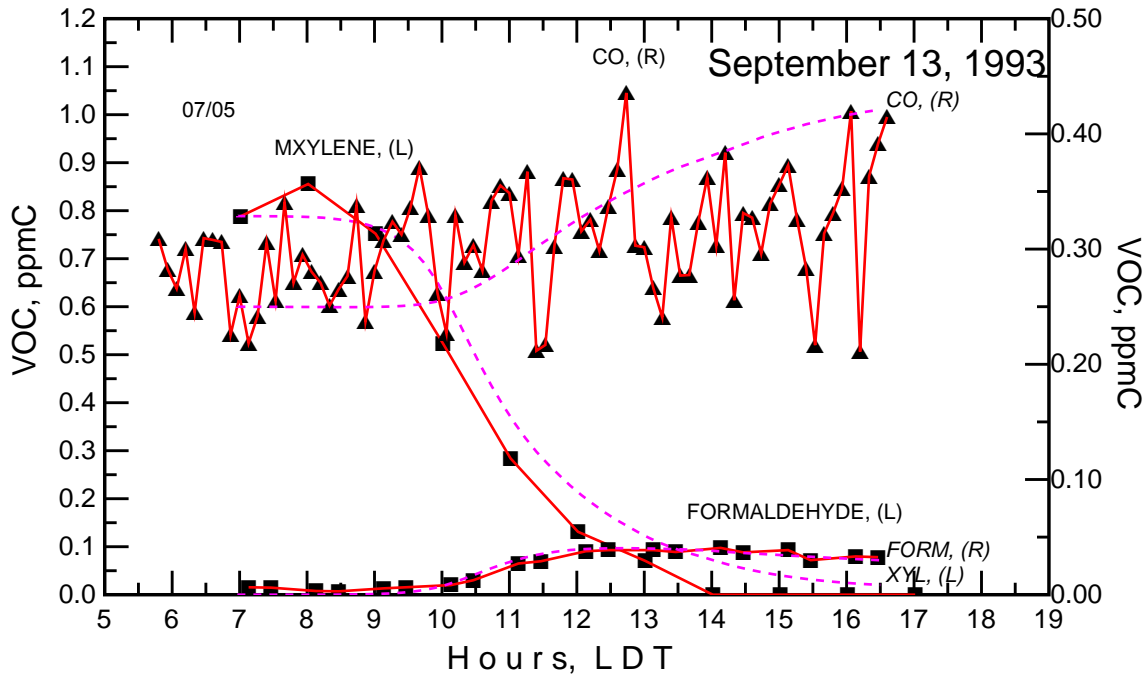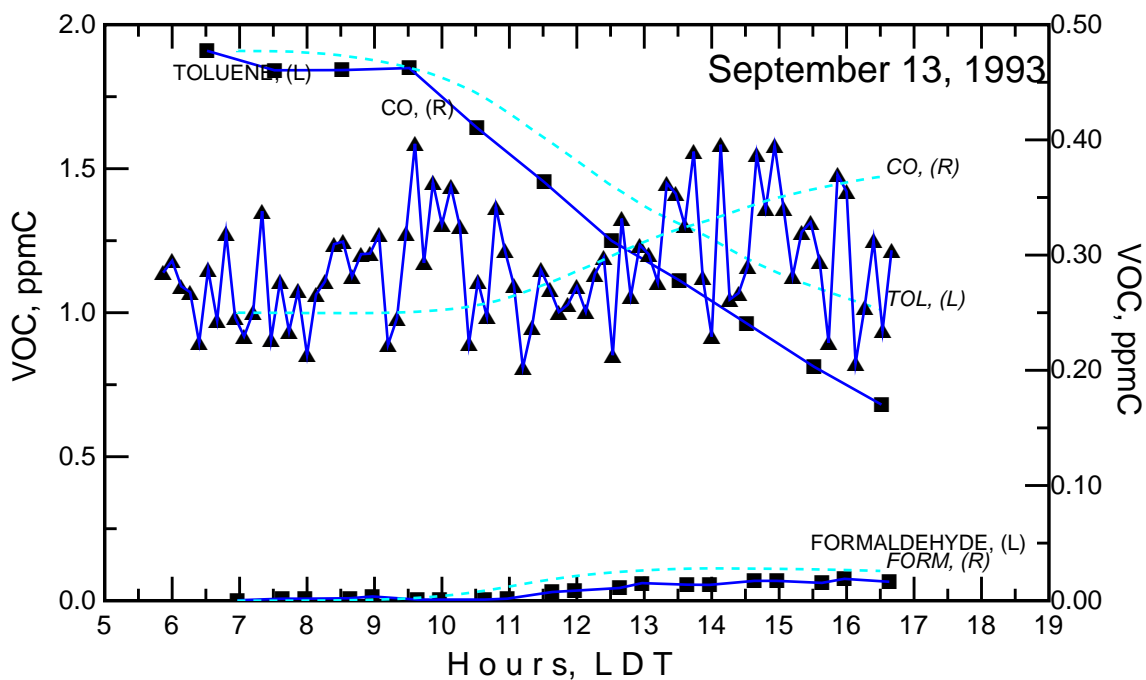

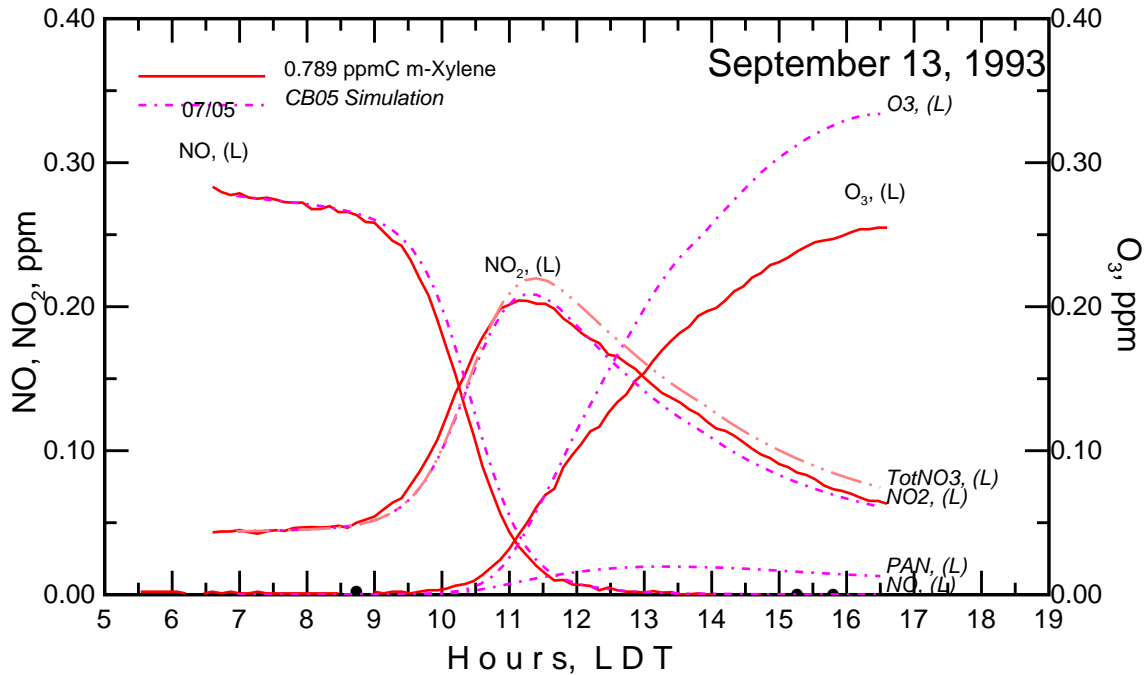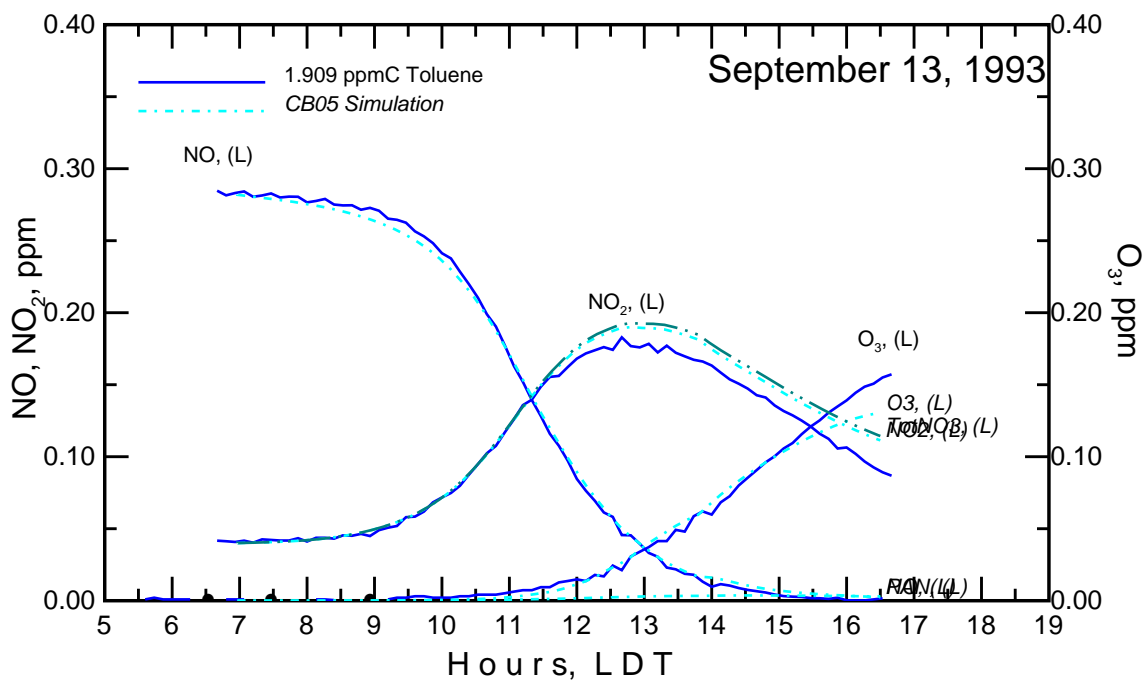

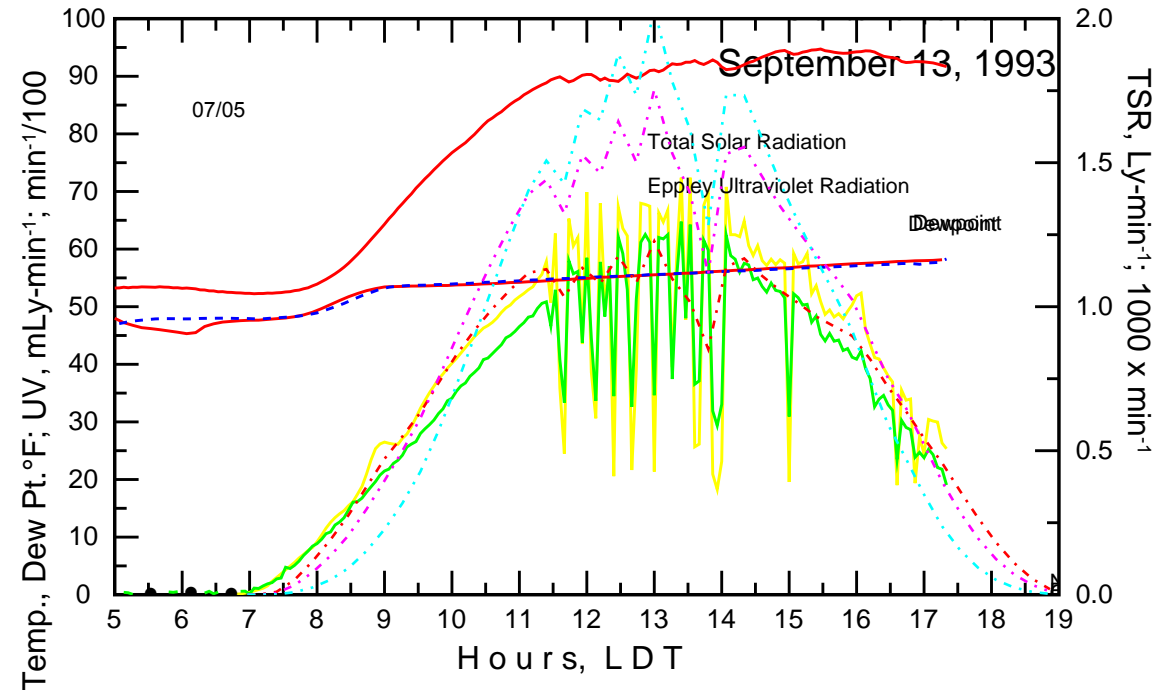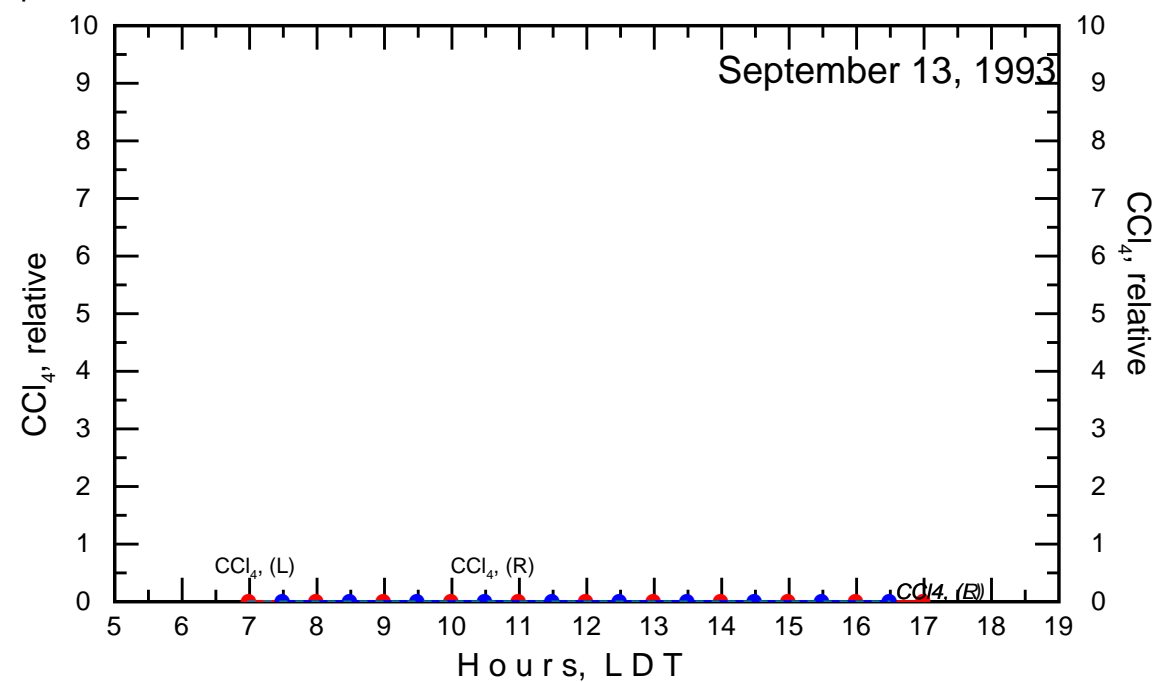

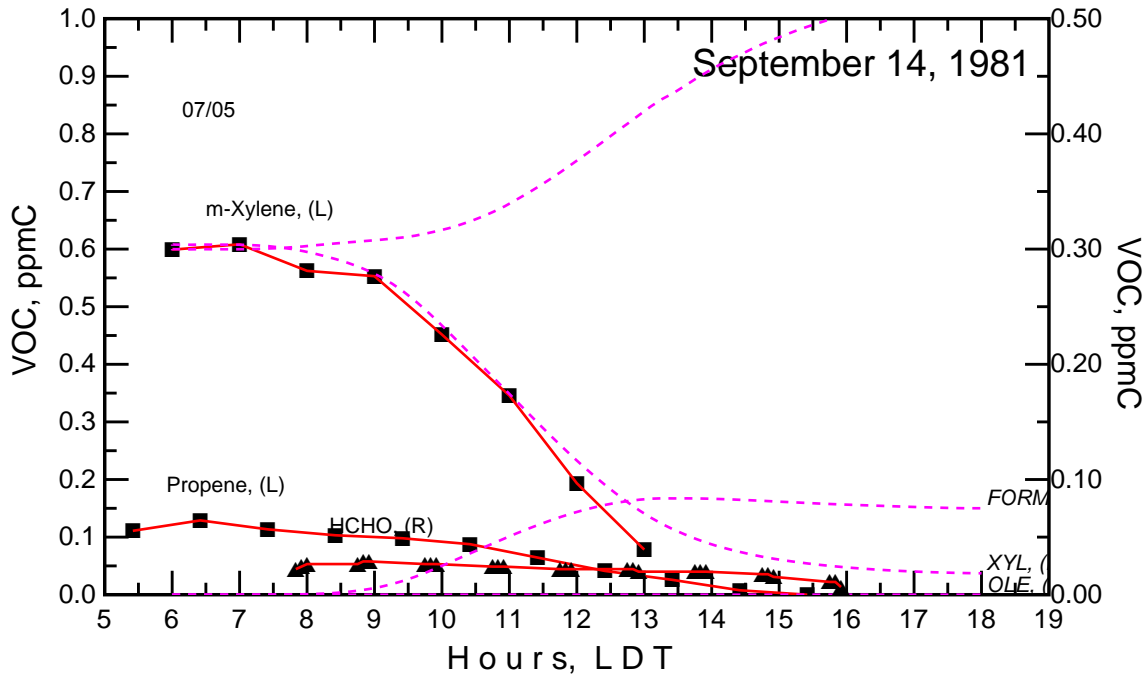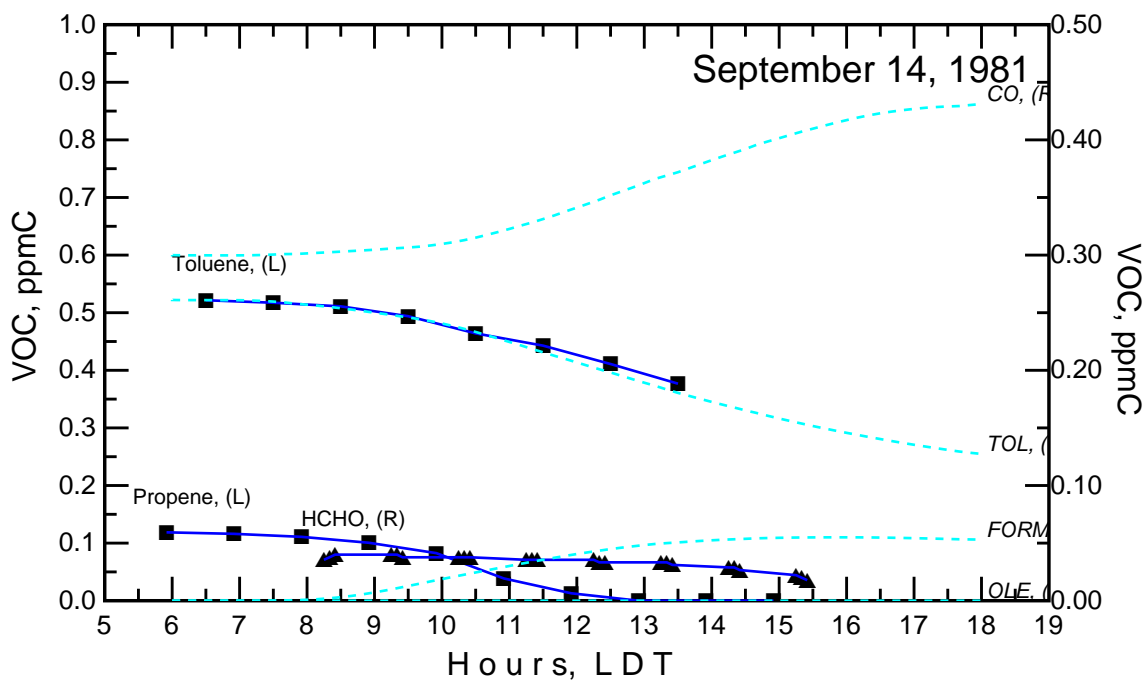

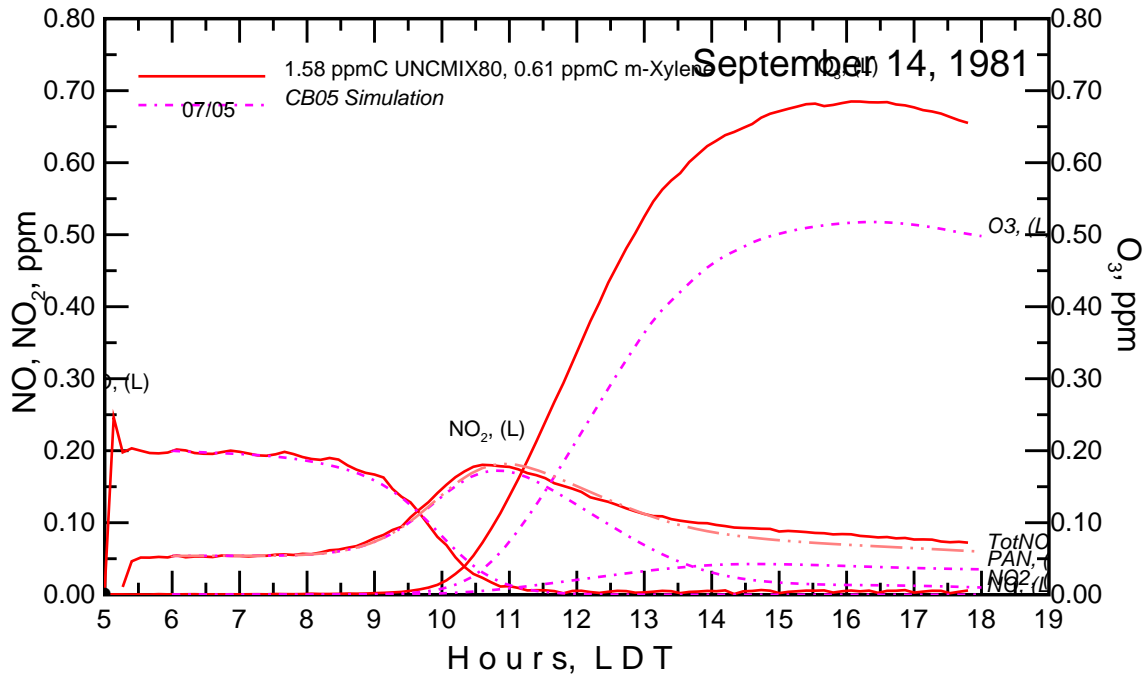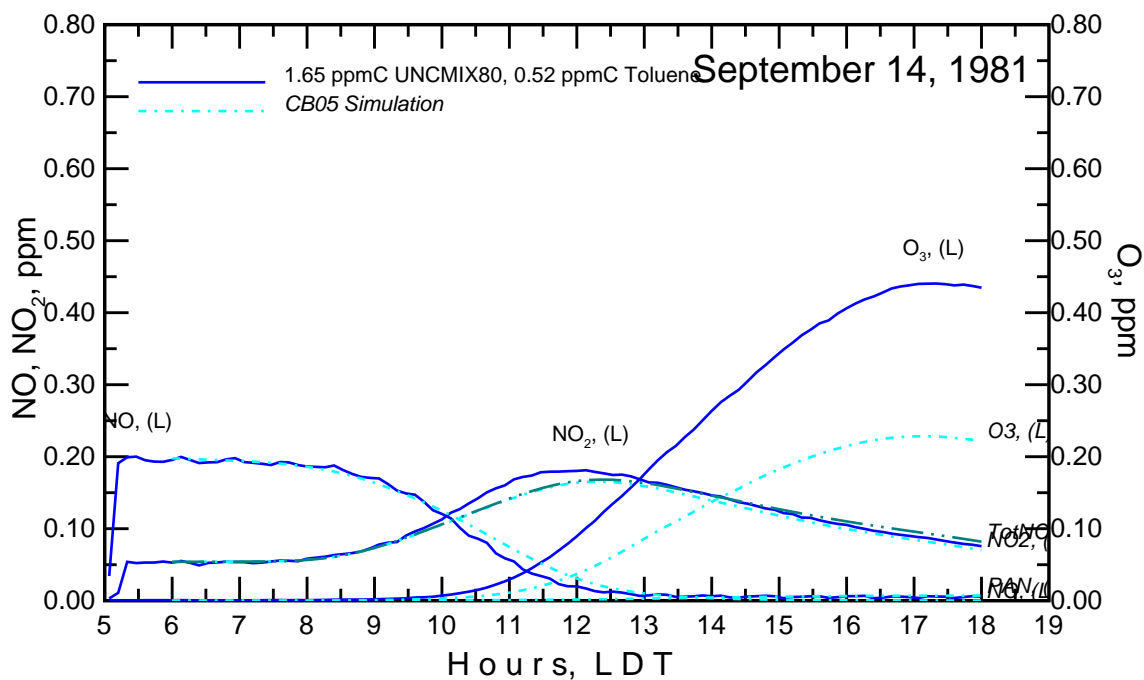

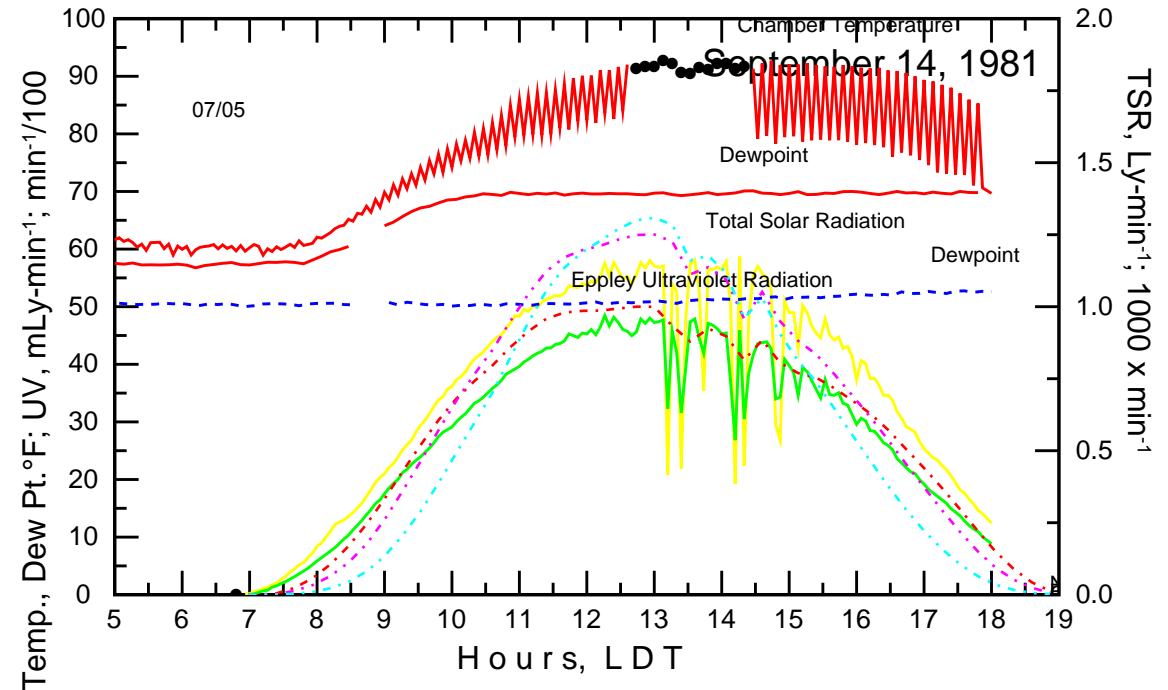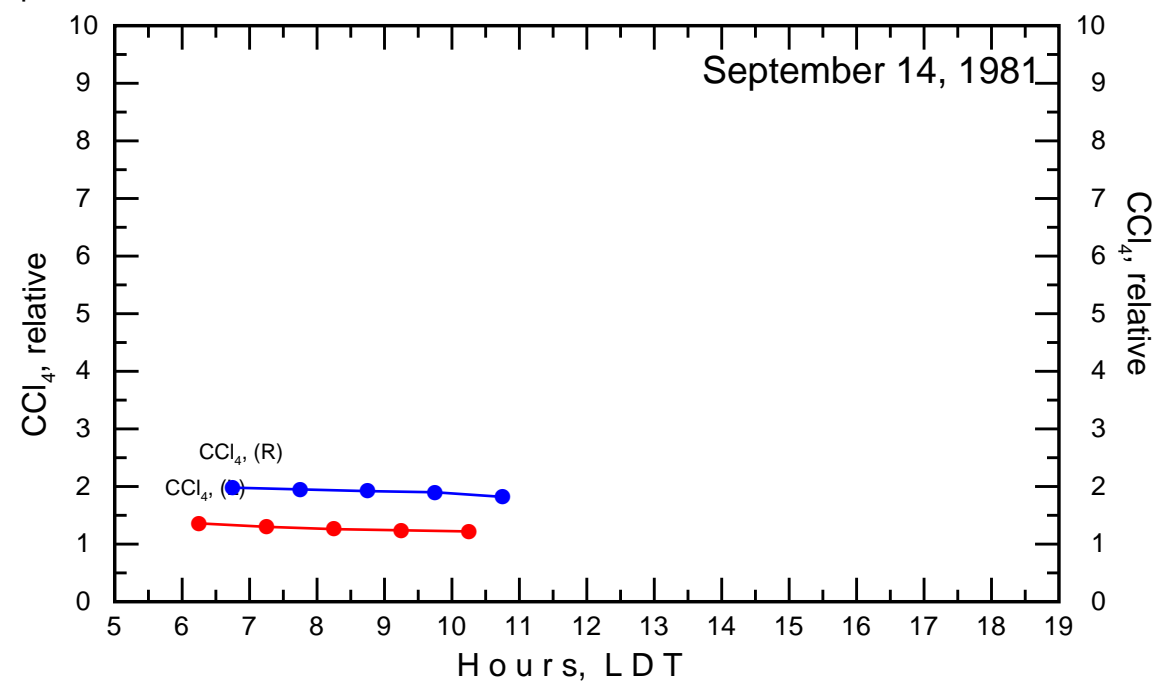

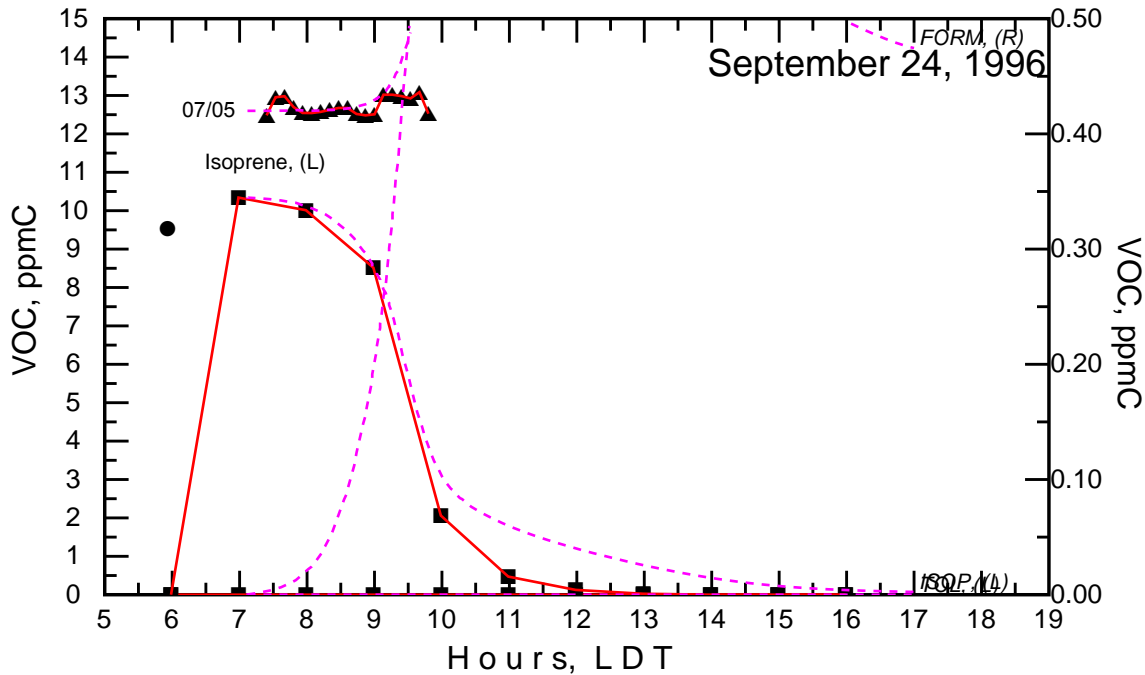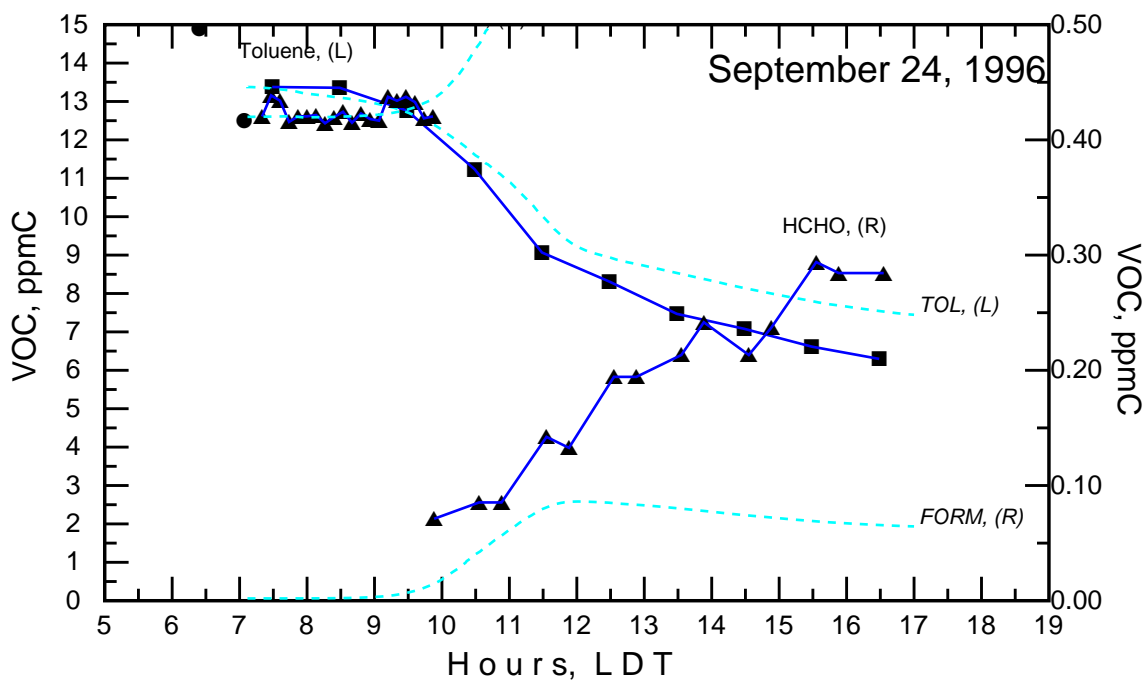

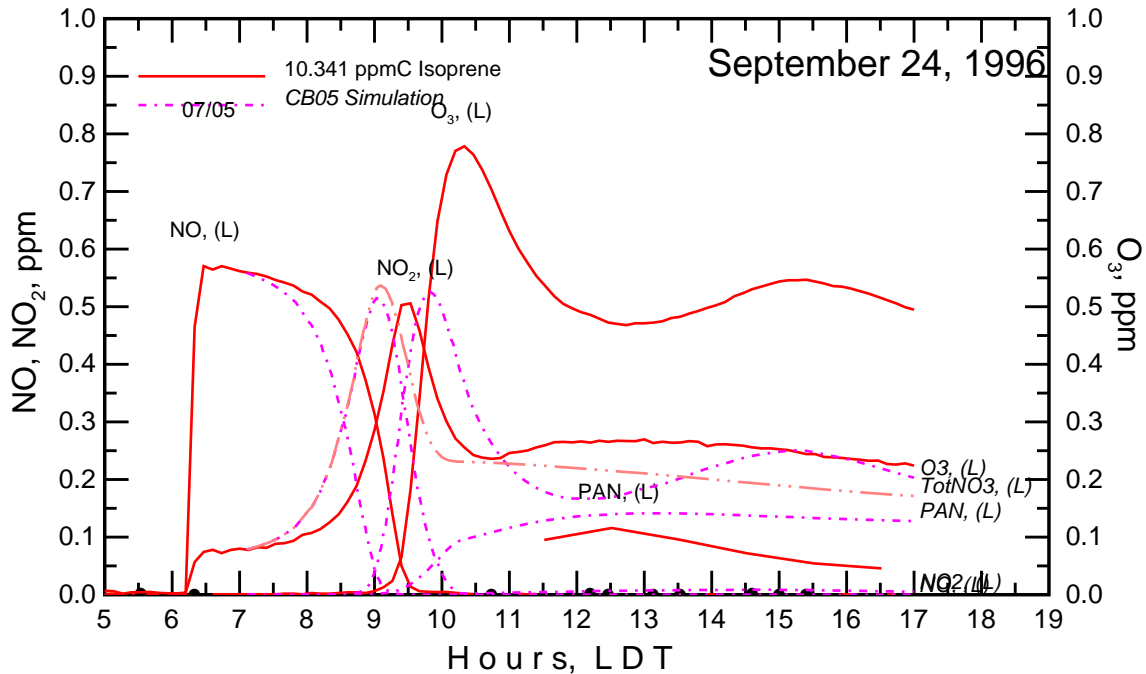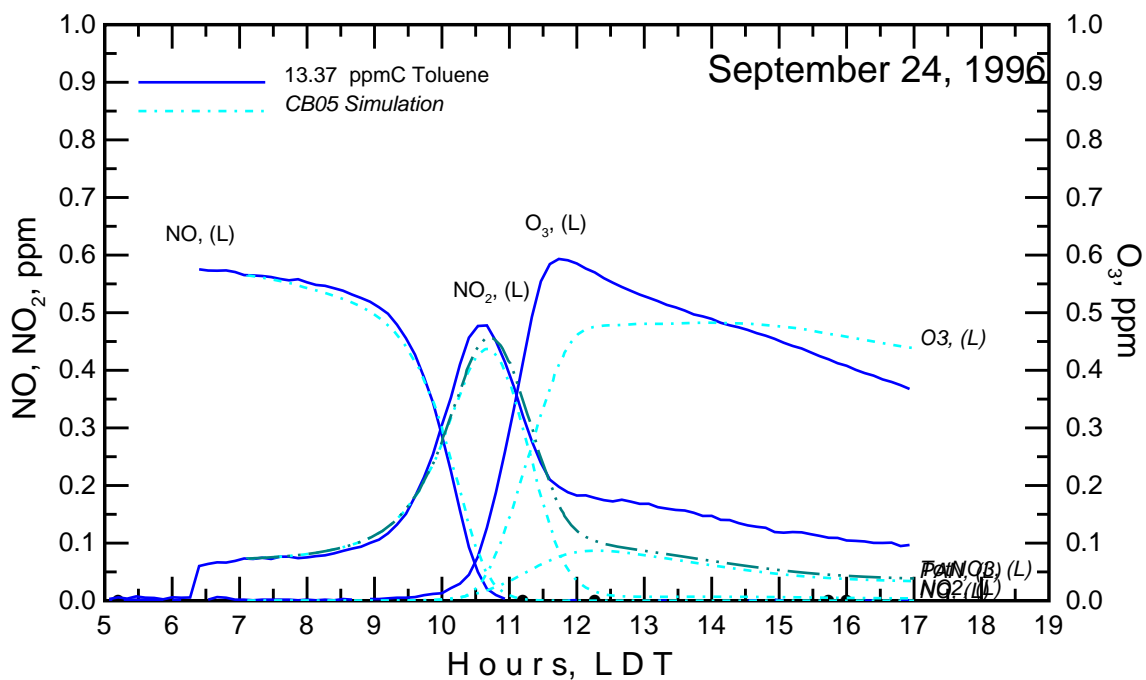

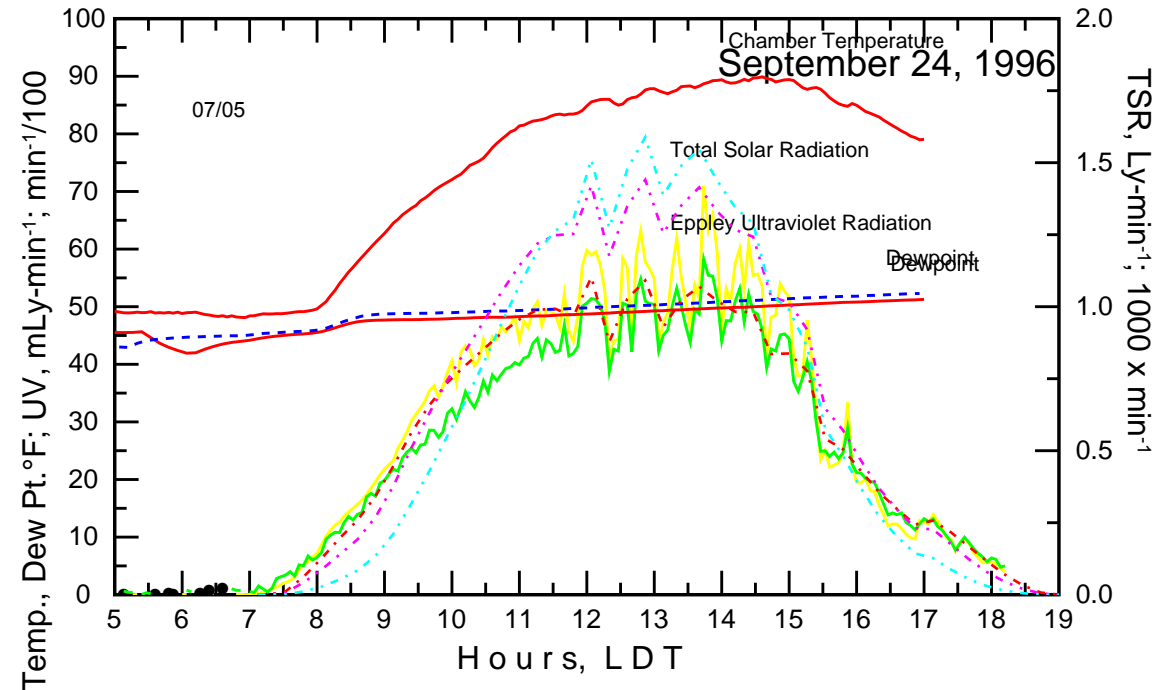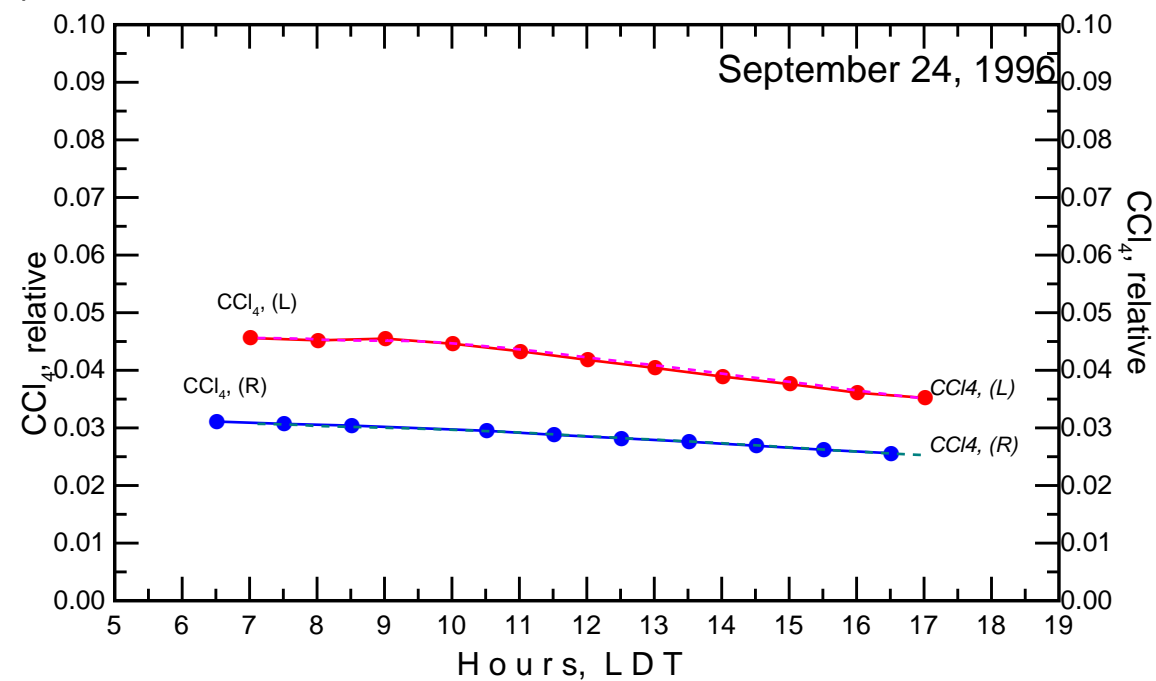

## **Isoprene (ISOP)**

JN 26 97  
AU 06 96  
ST 11 99  
ST 24 96

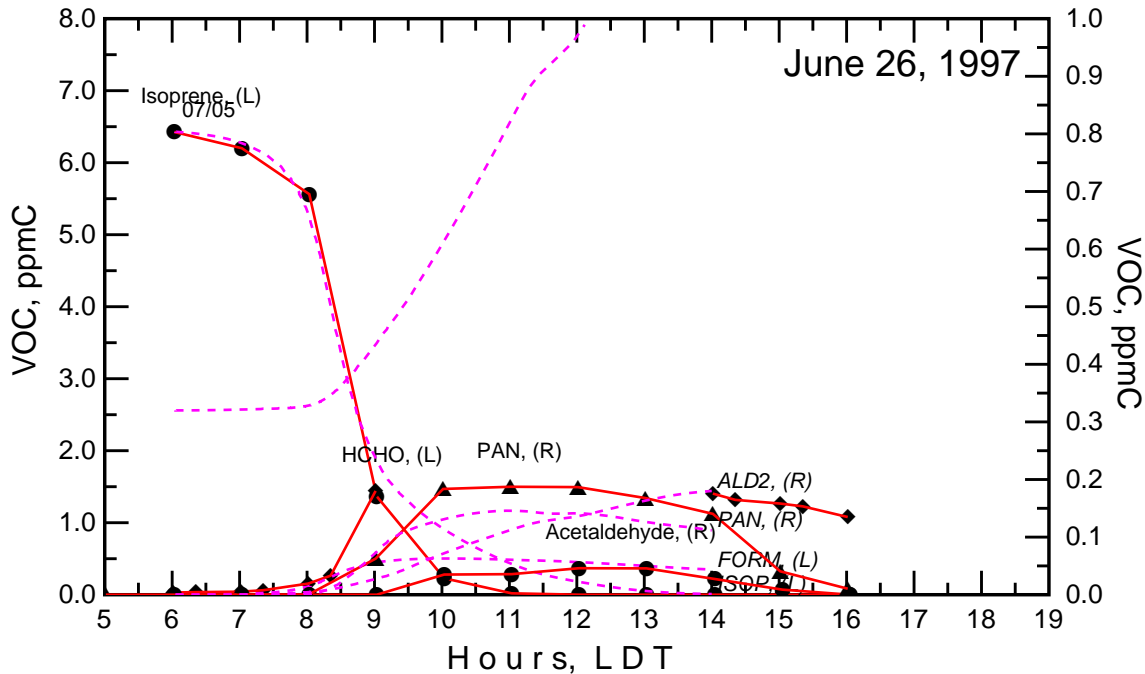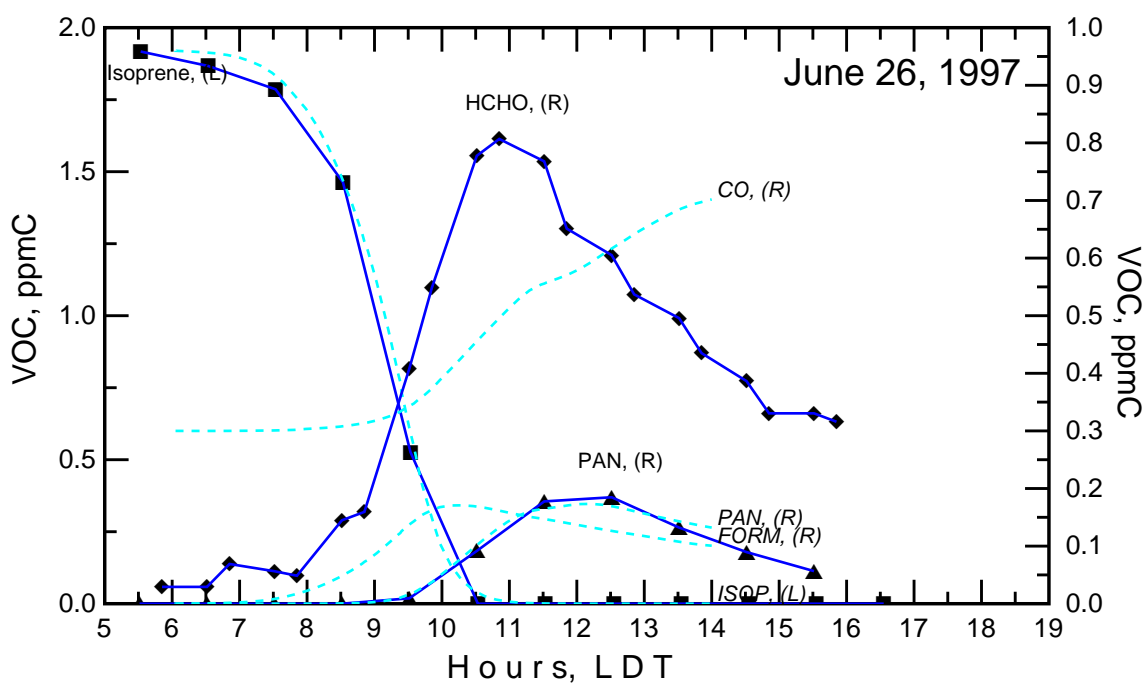

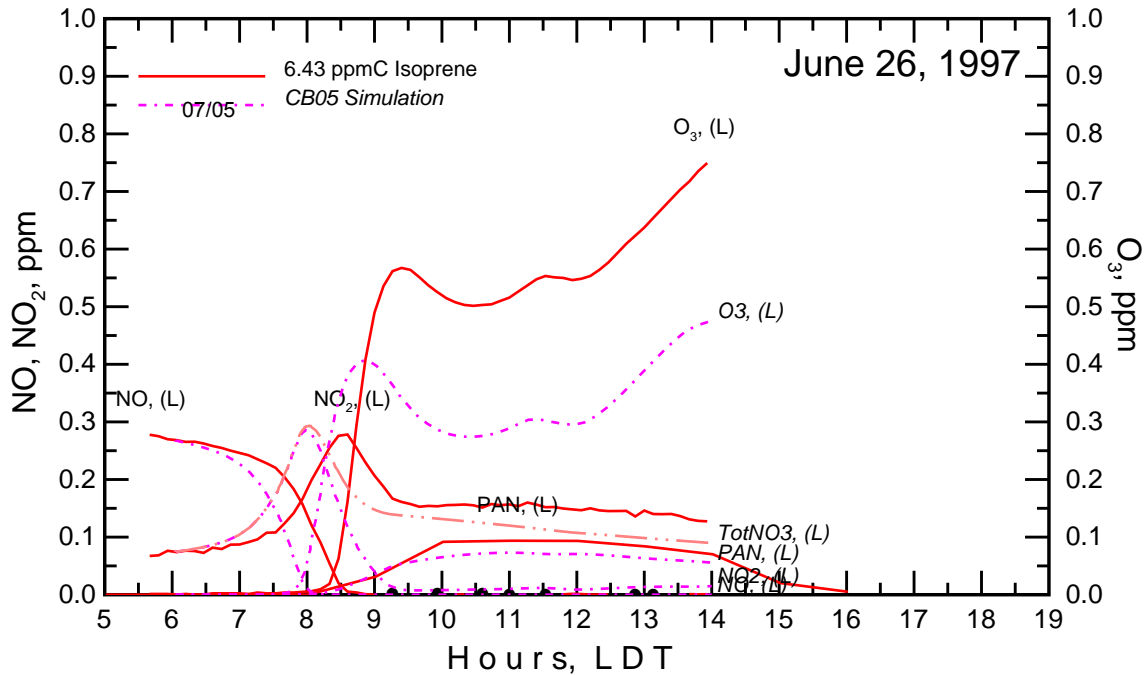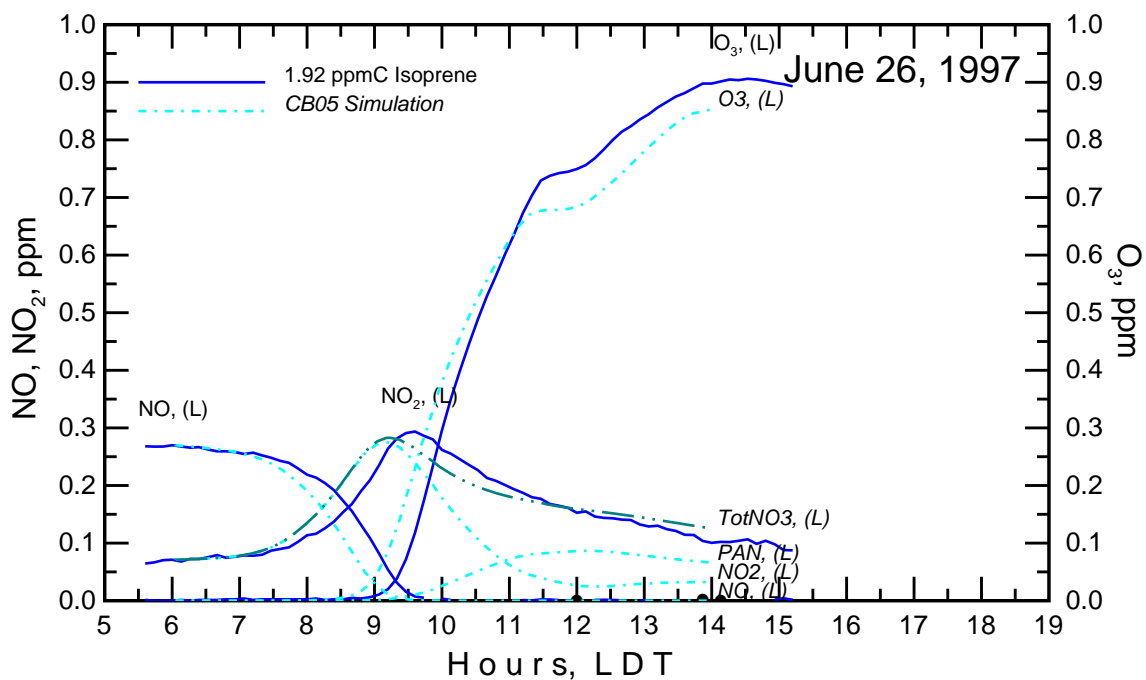

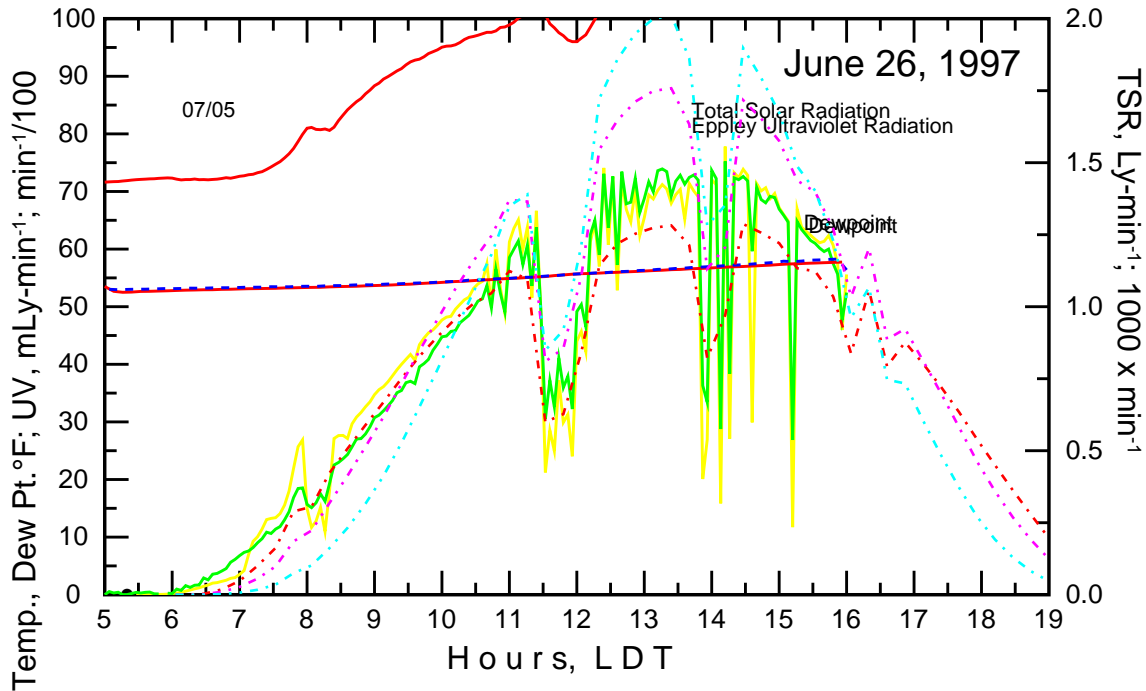

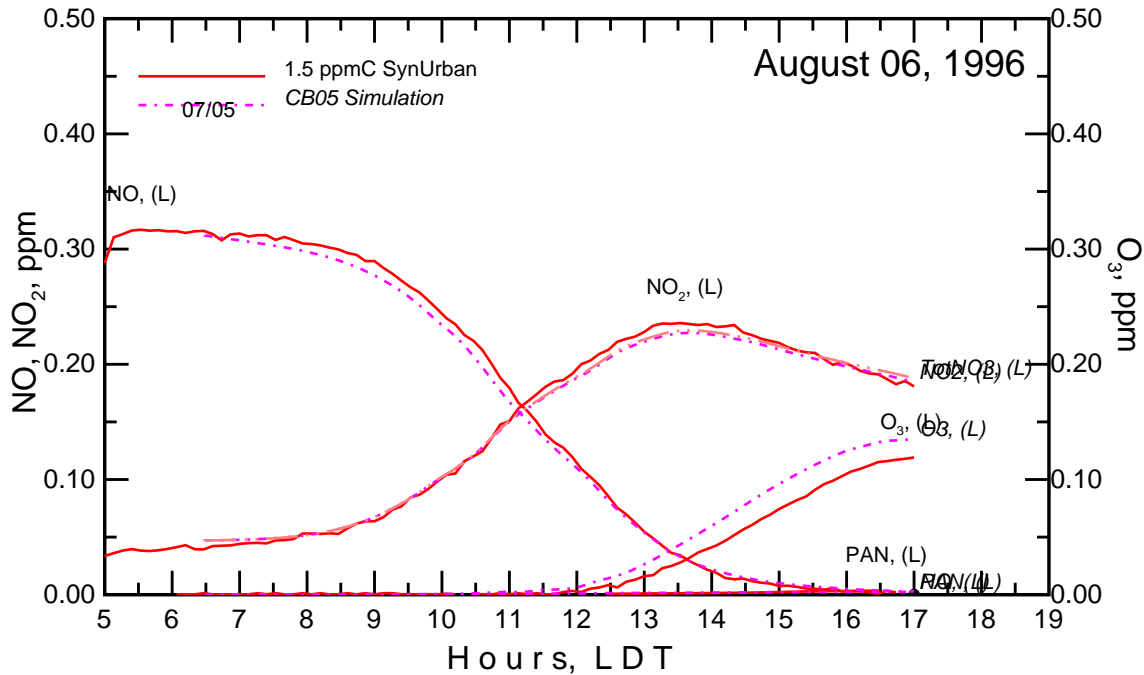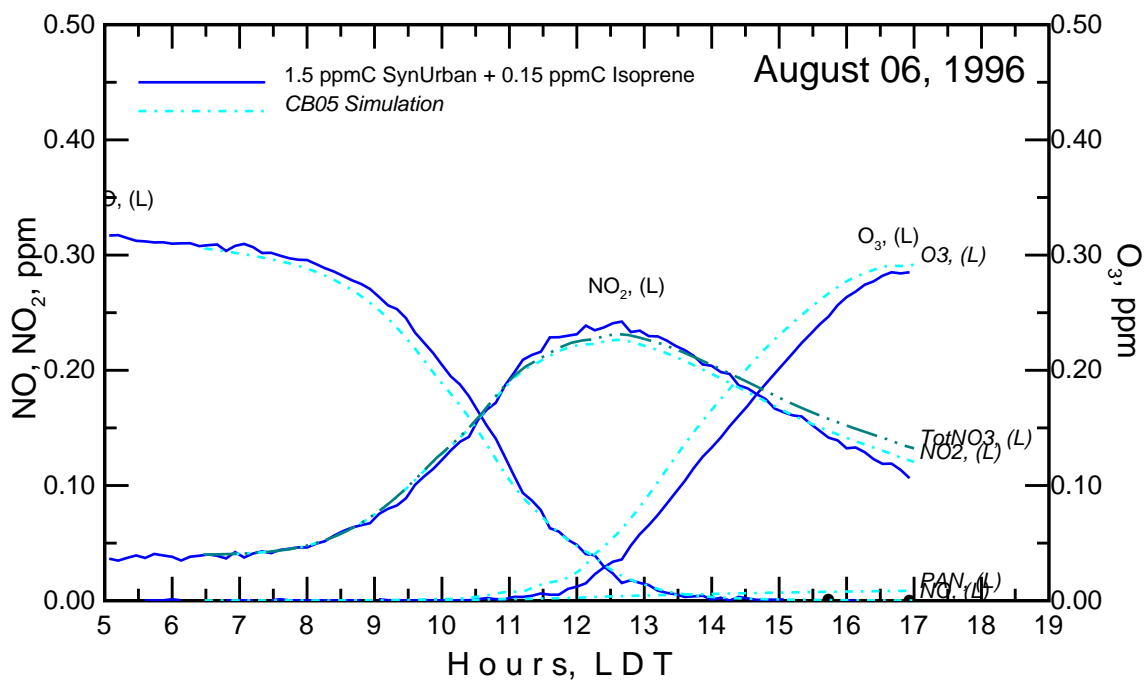

Matched SynUrban and NO<sub>x</sub> with Isoprene added BLUE

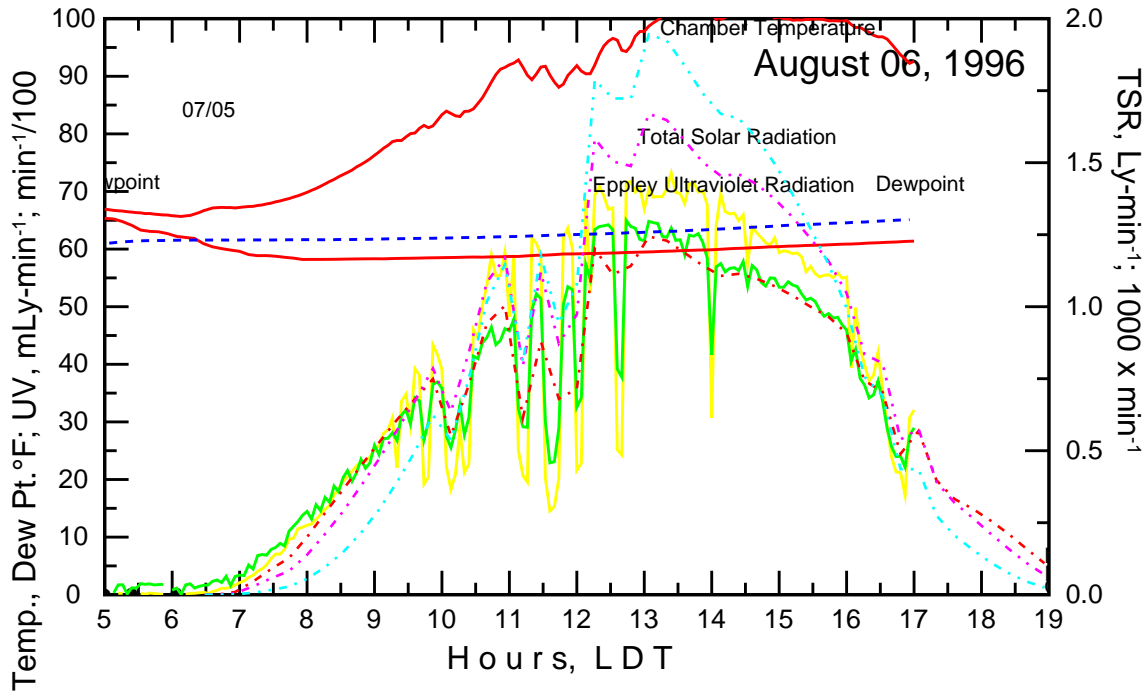

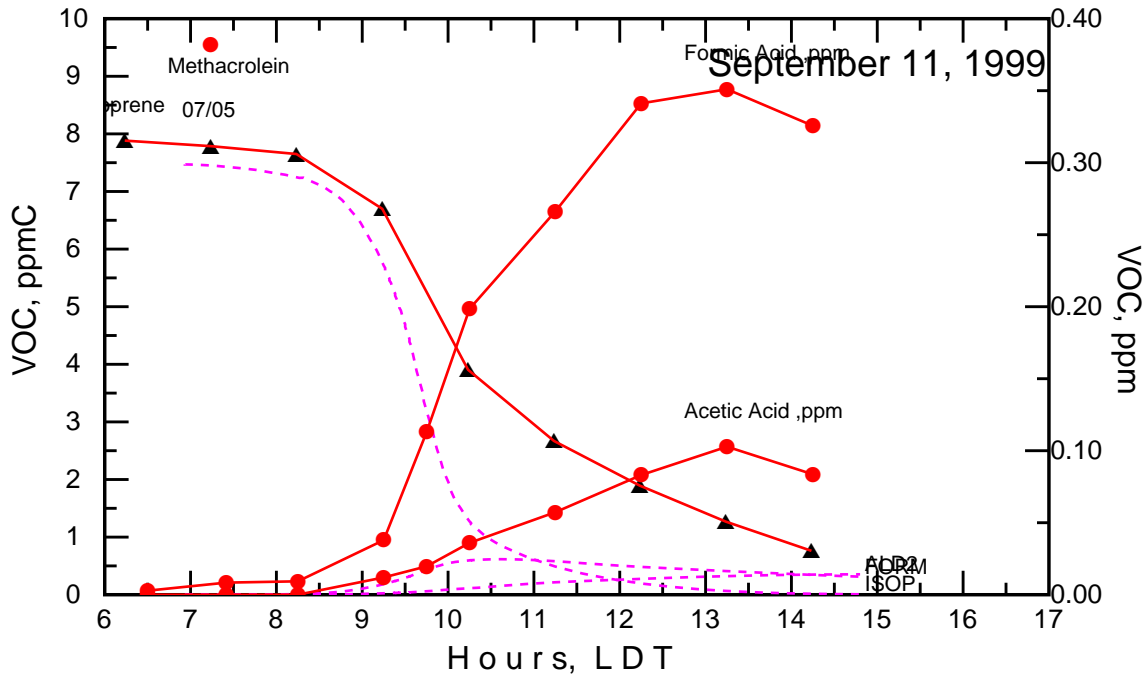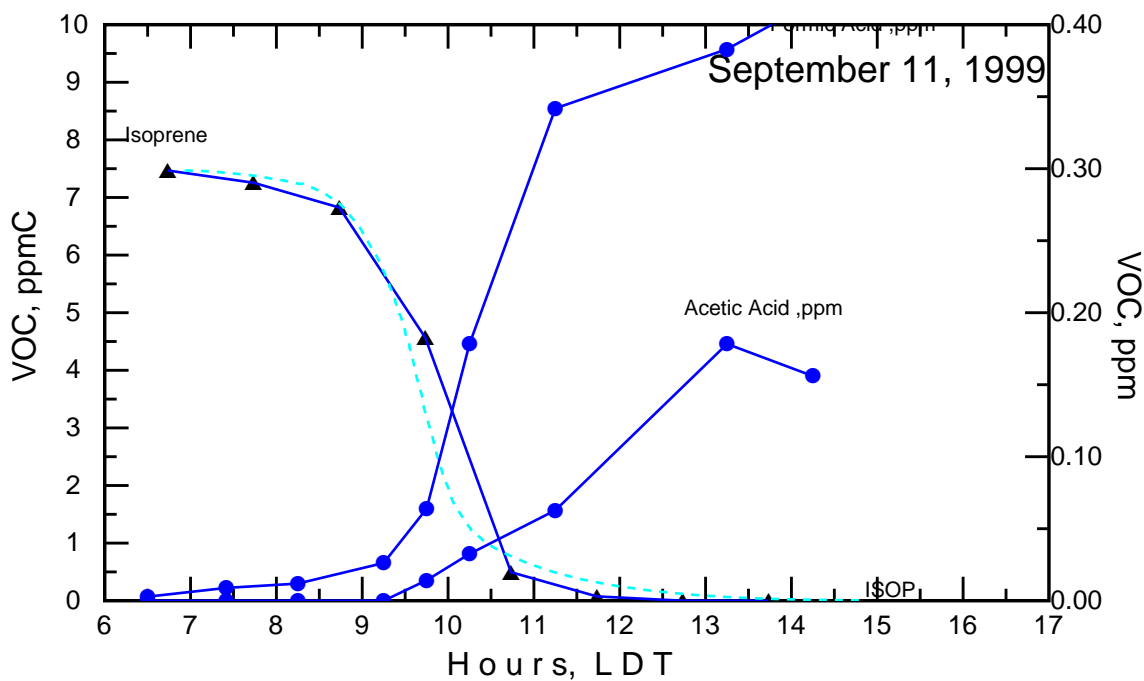

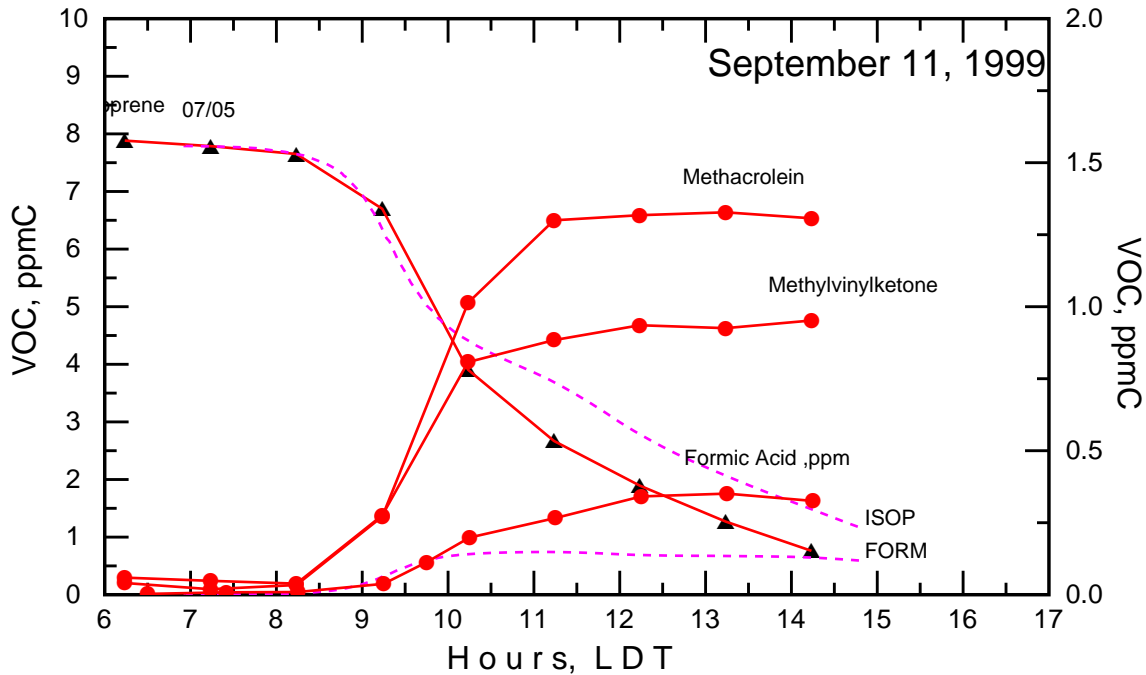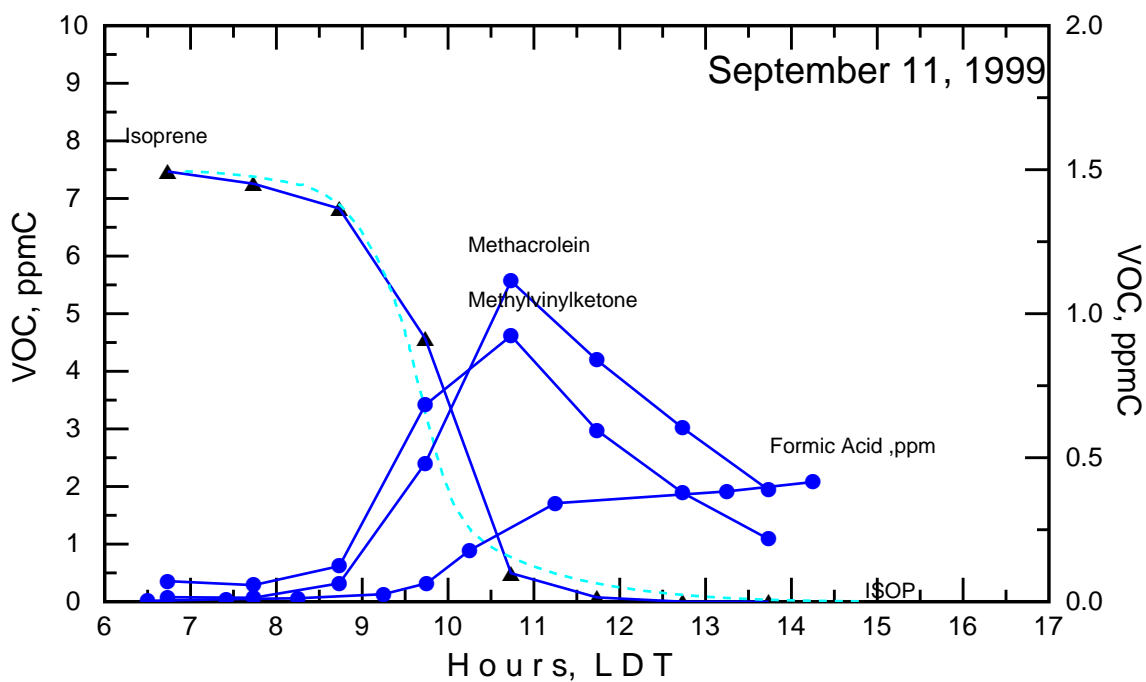

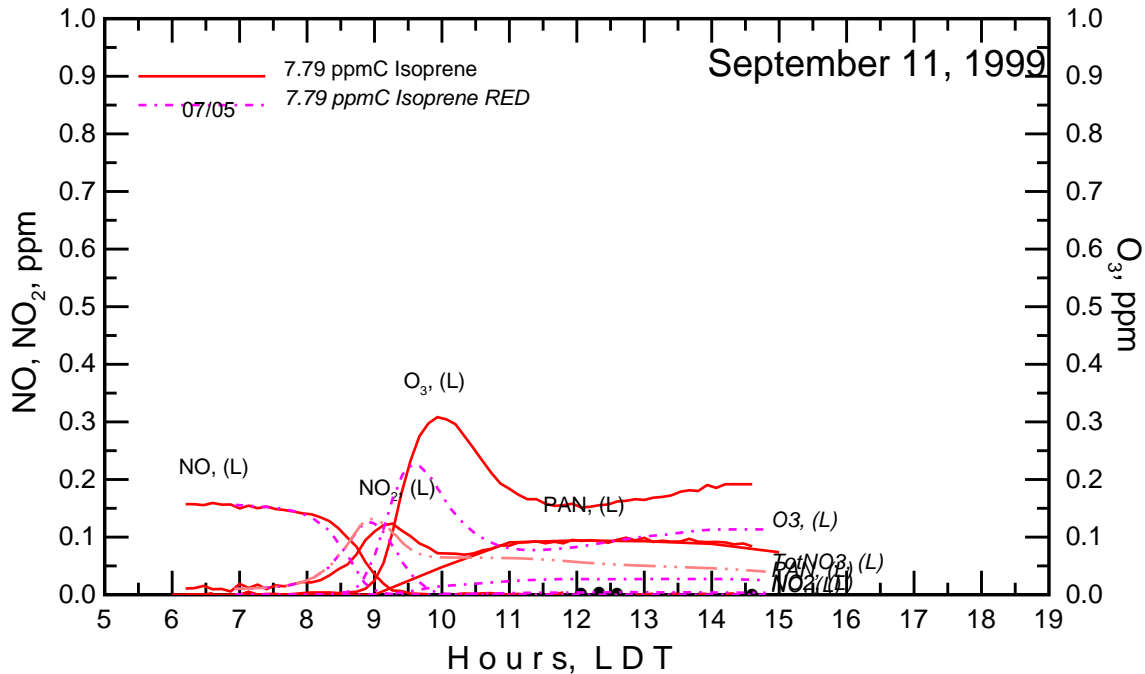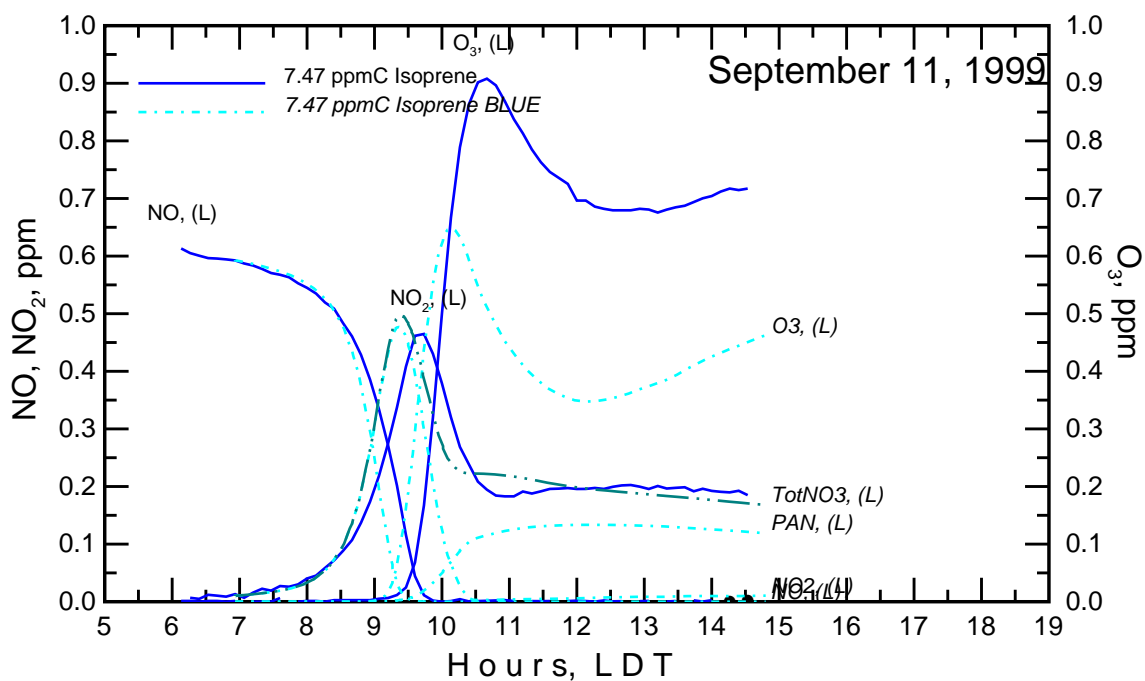

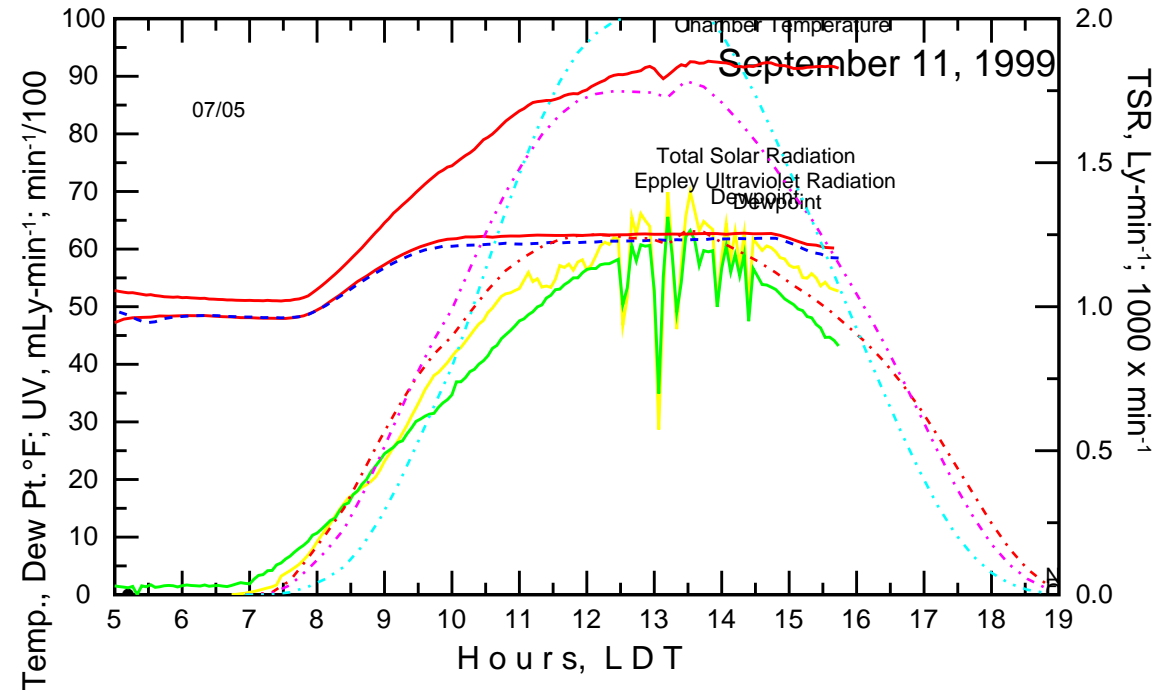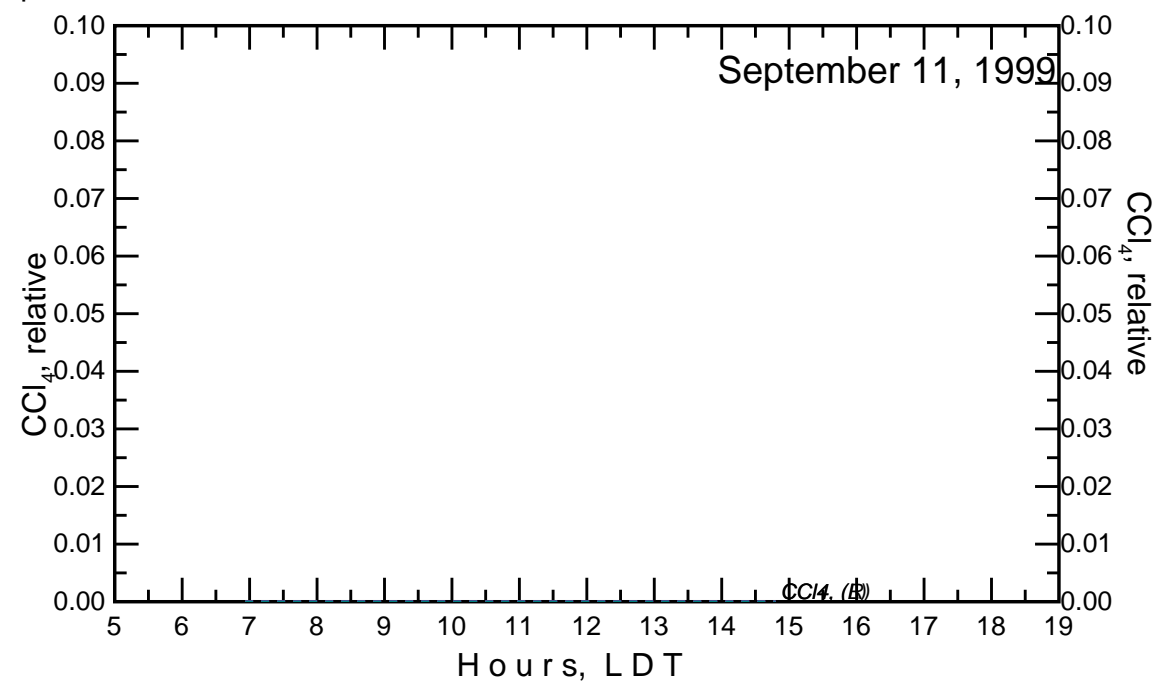



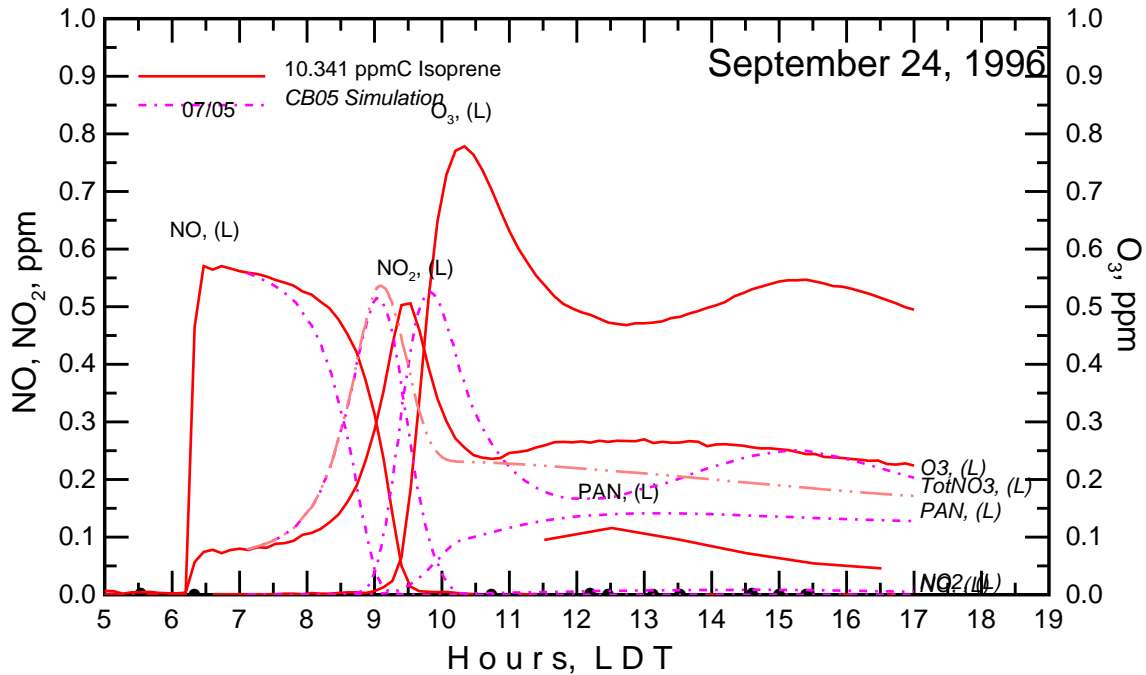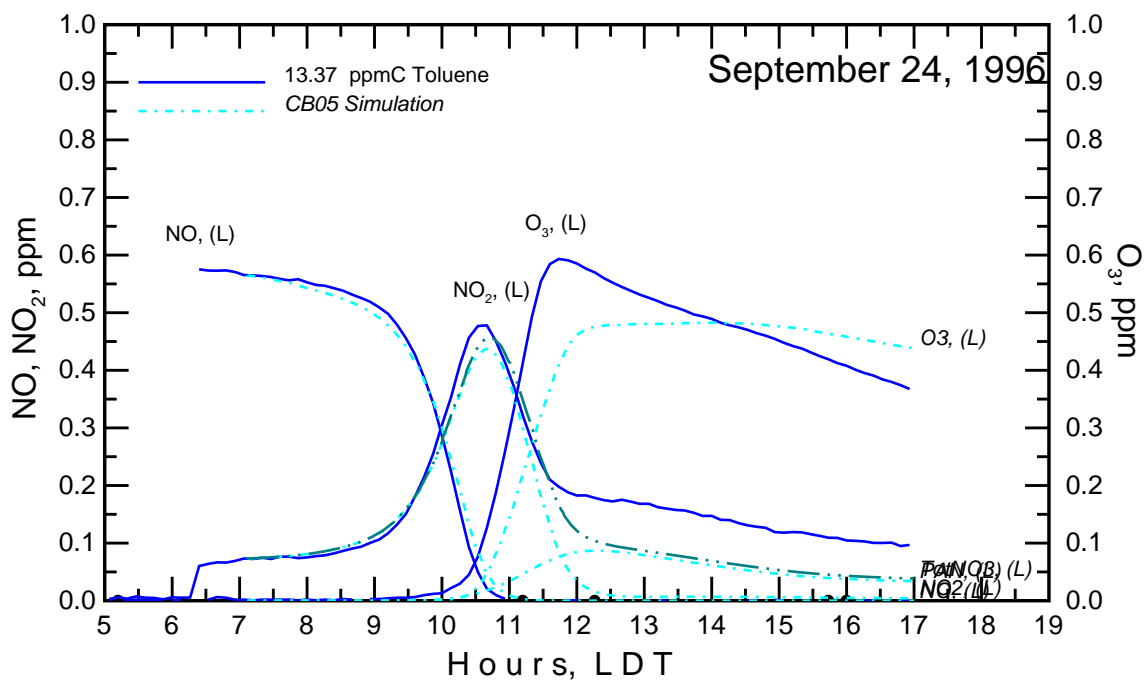

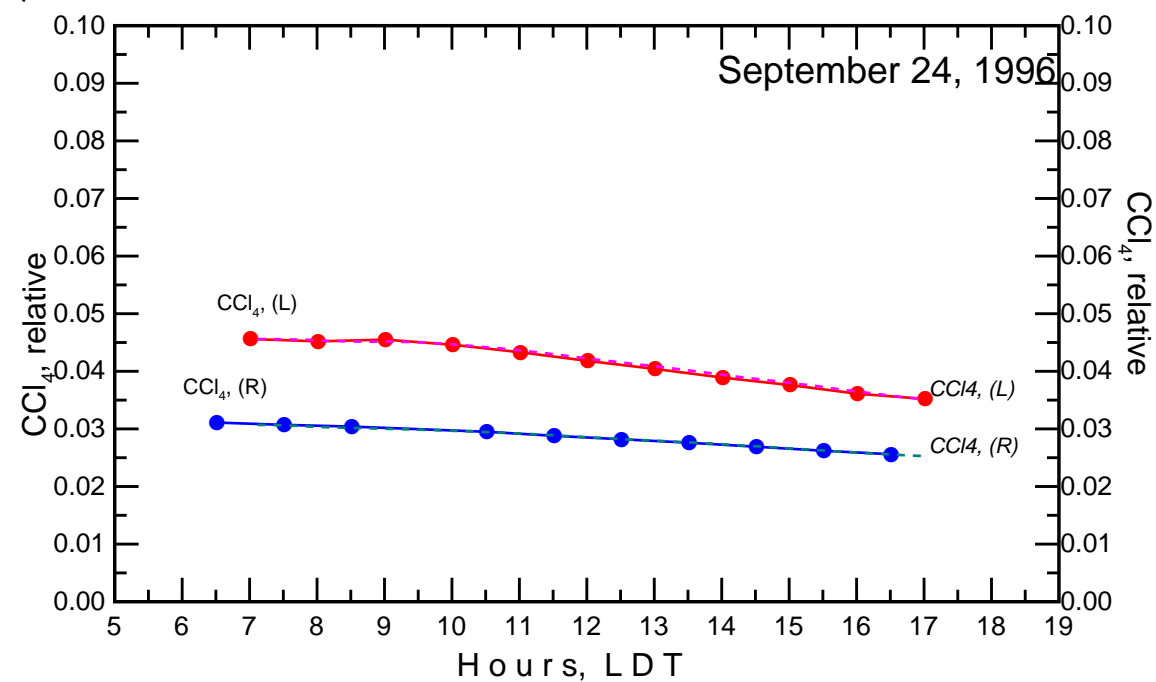

## Urban Mixture

JN 19 97  
AU 26 01  
ST 10 99  
ST 12 94  
ST 14 00  
ST 14 94  
ST 15 94  
ST 26 99

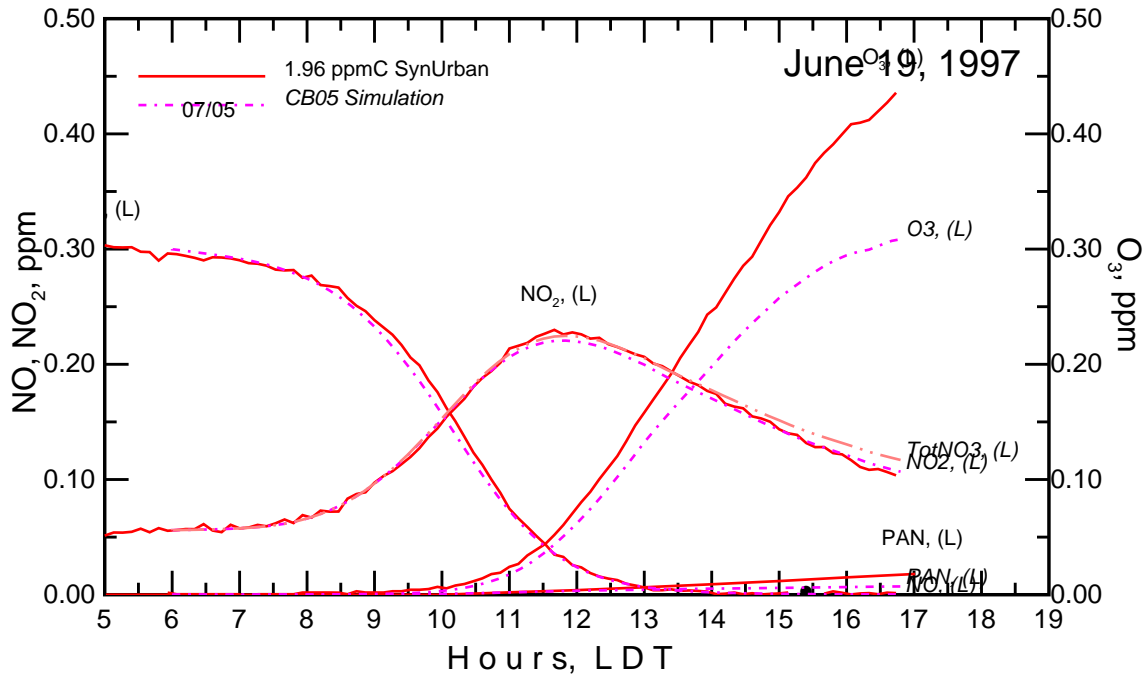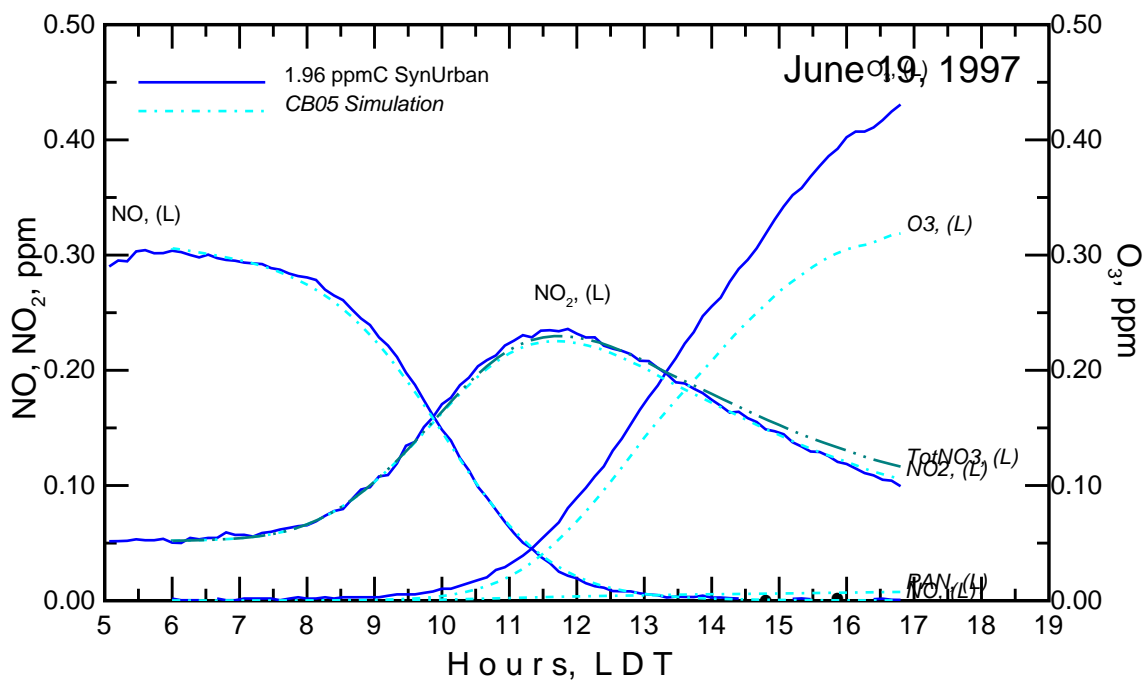

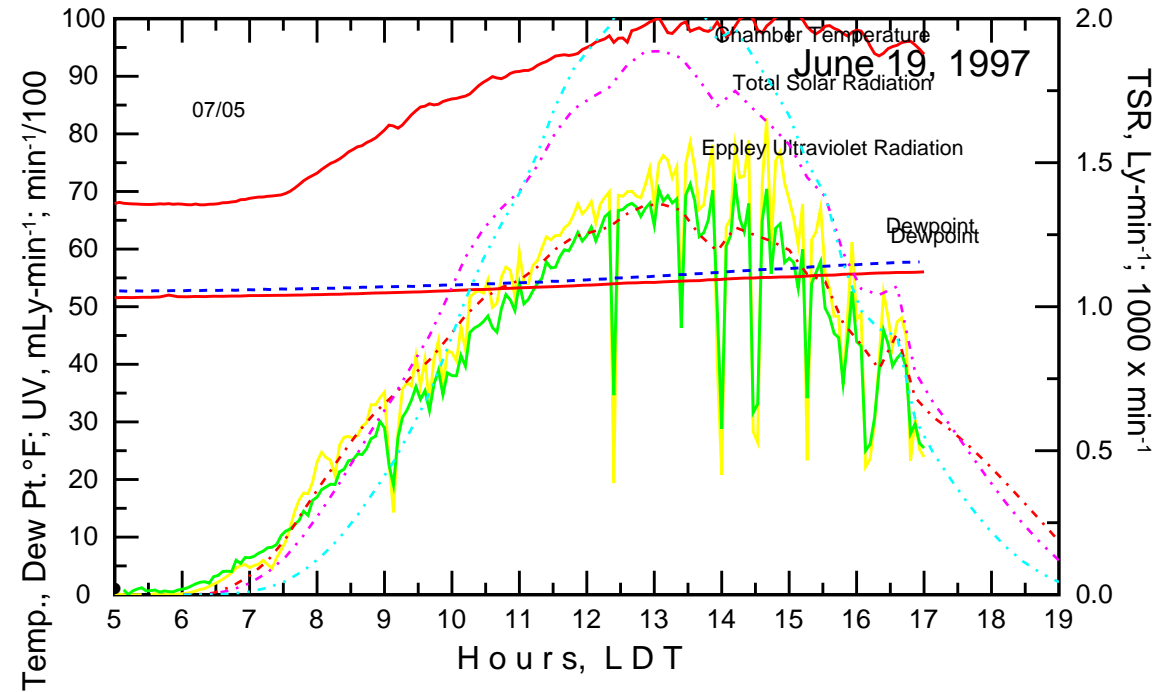

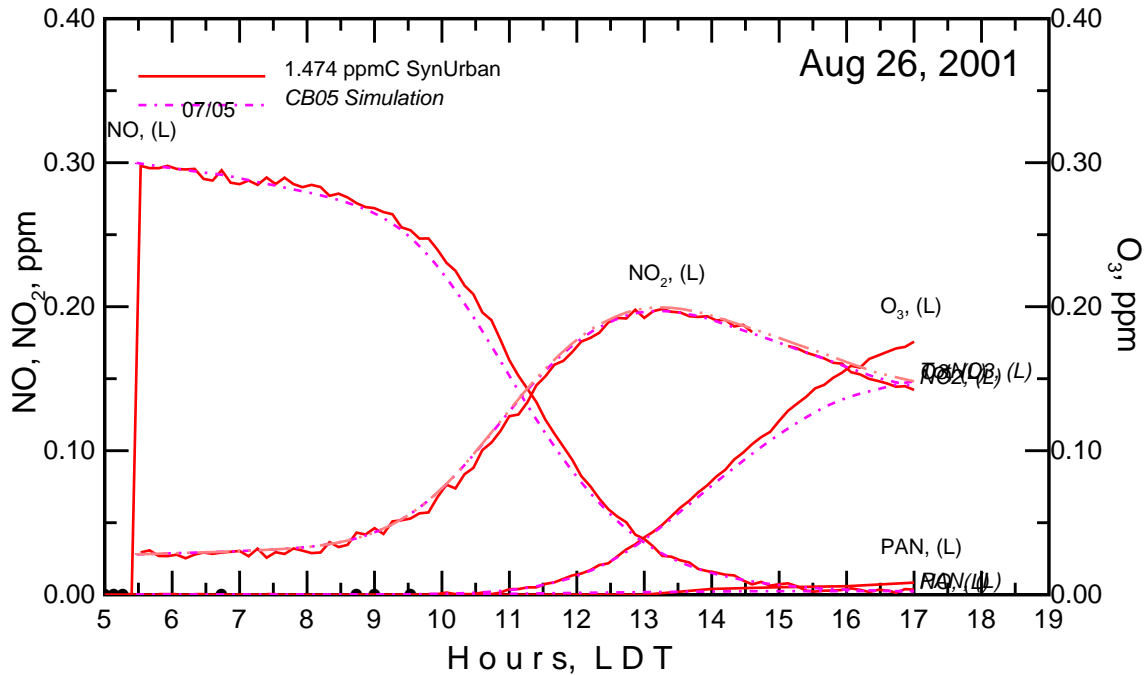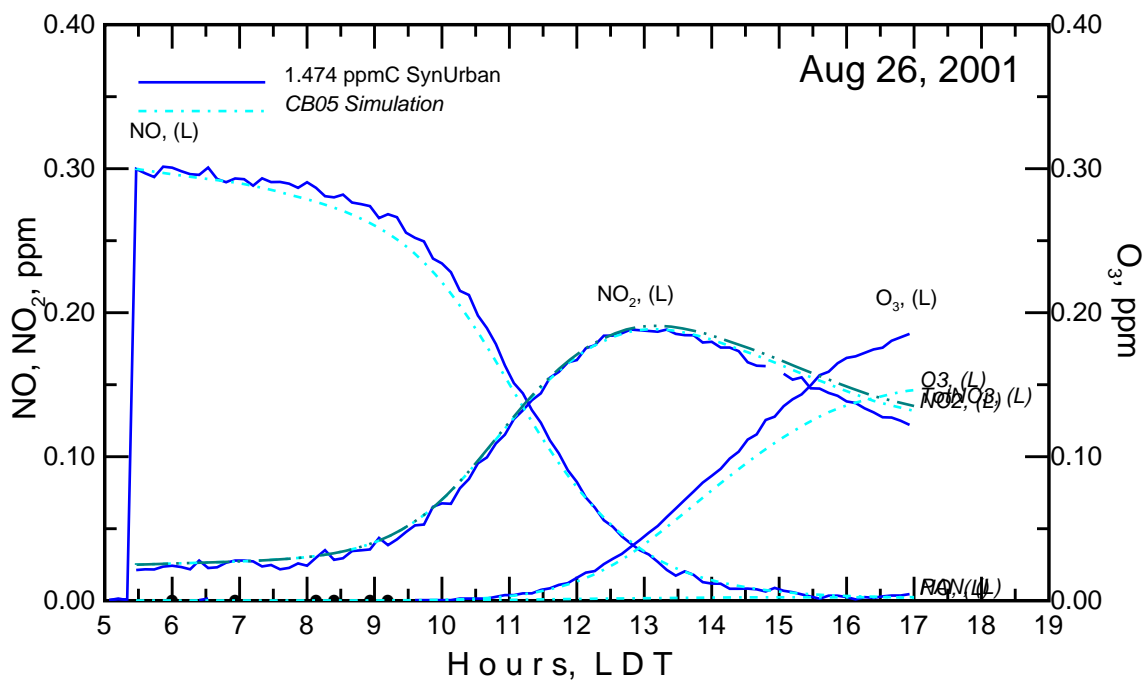

Matched SynUrban; Matched NO<sub>x</sub>

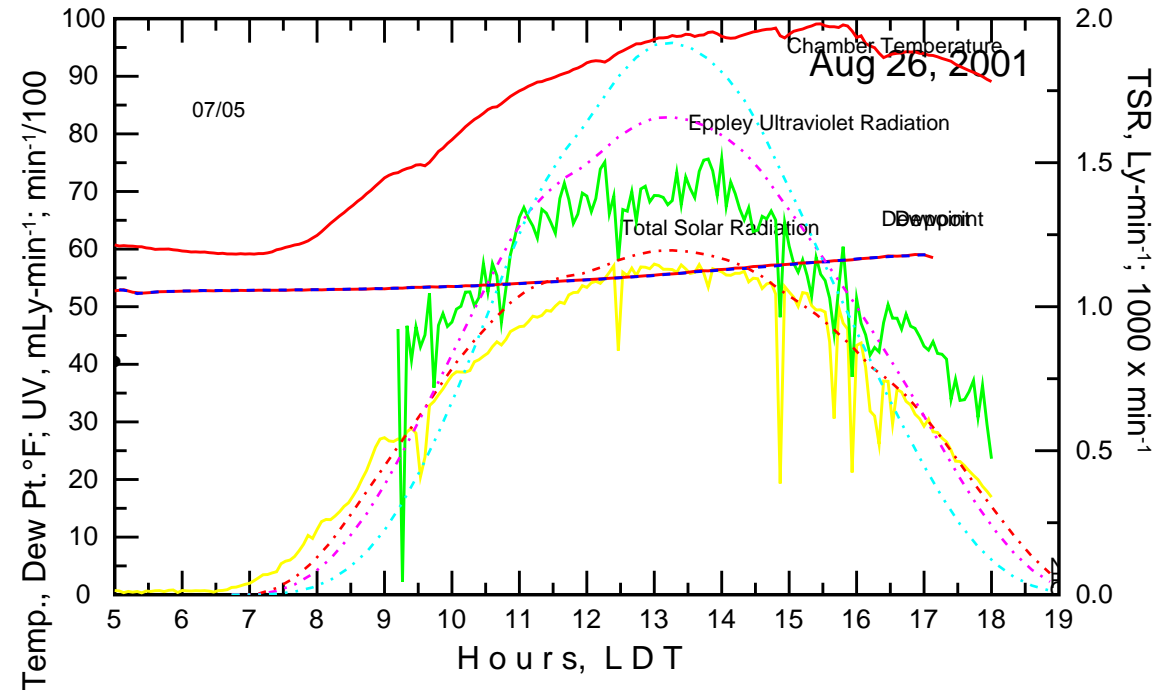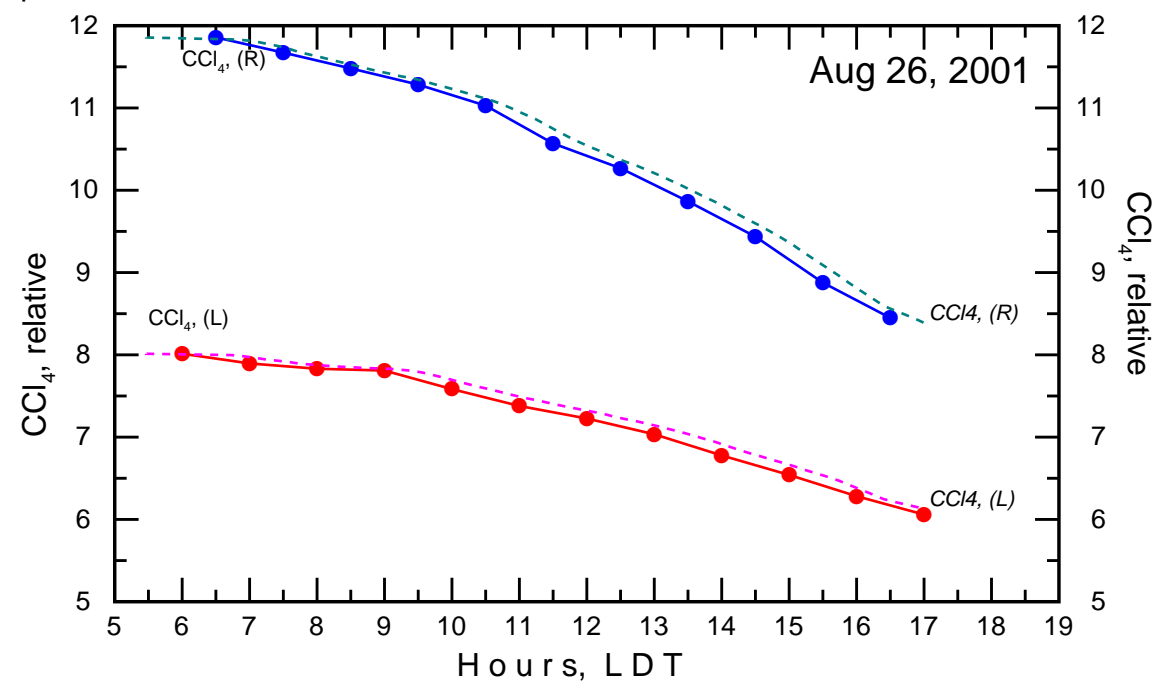

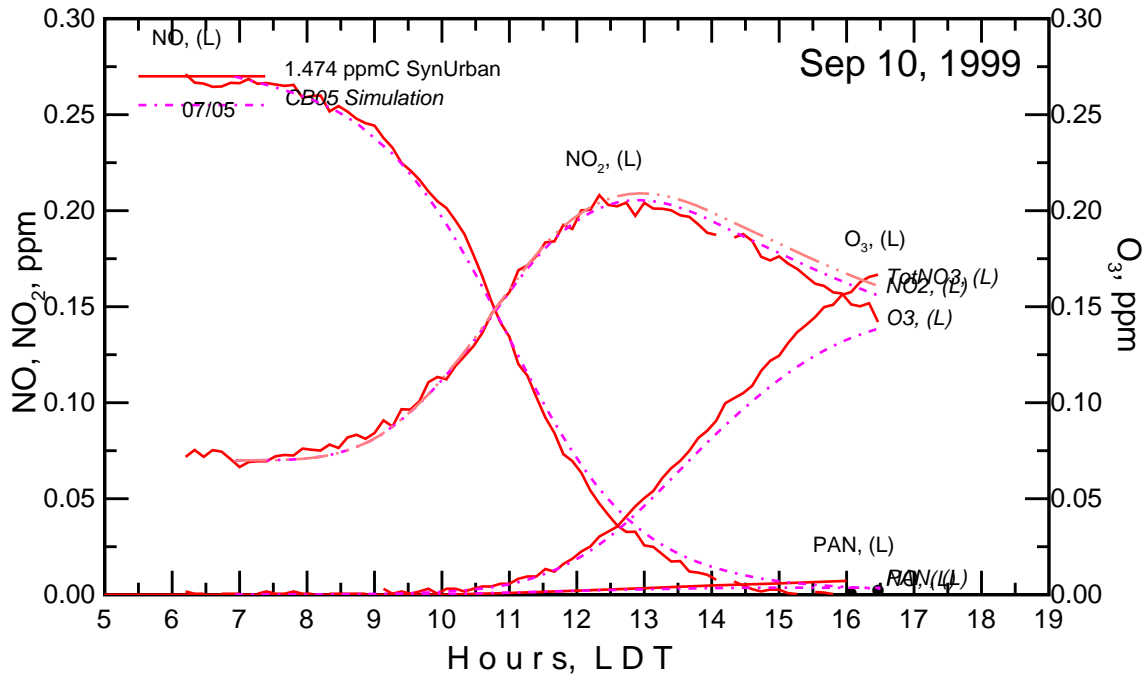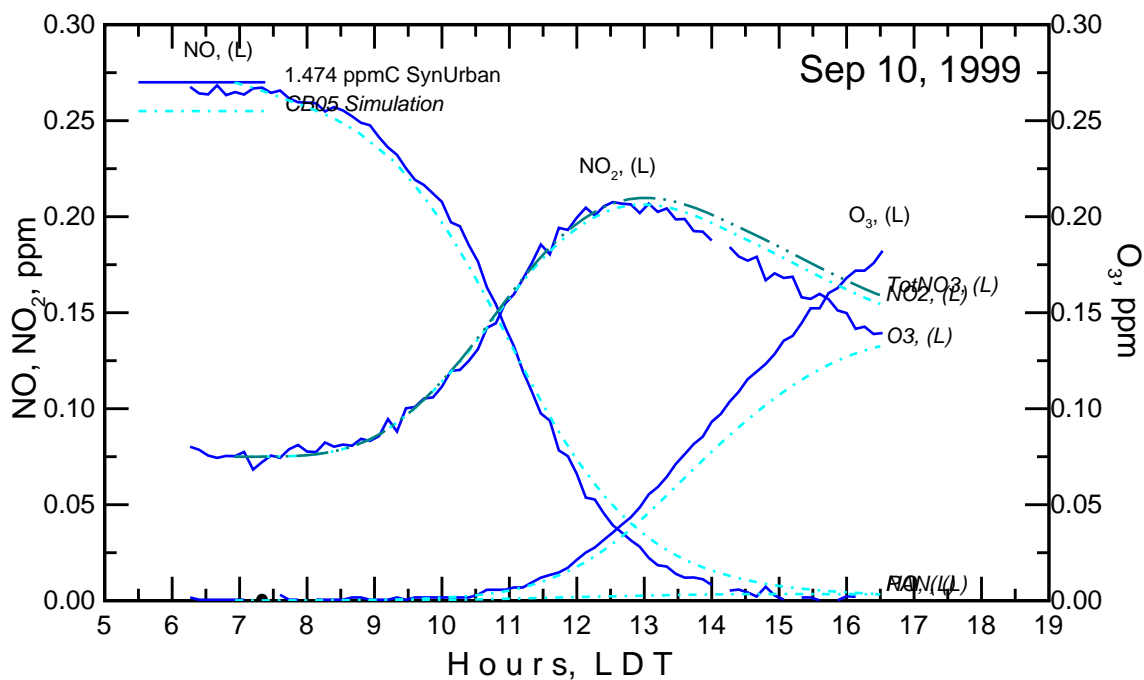

Matched SynUrban and NOx

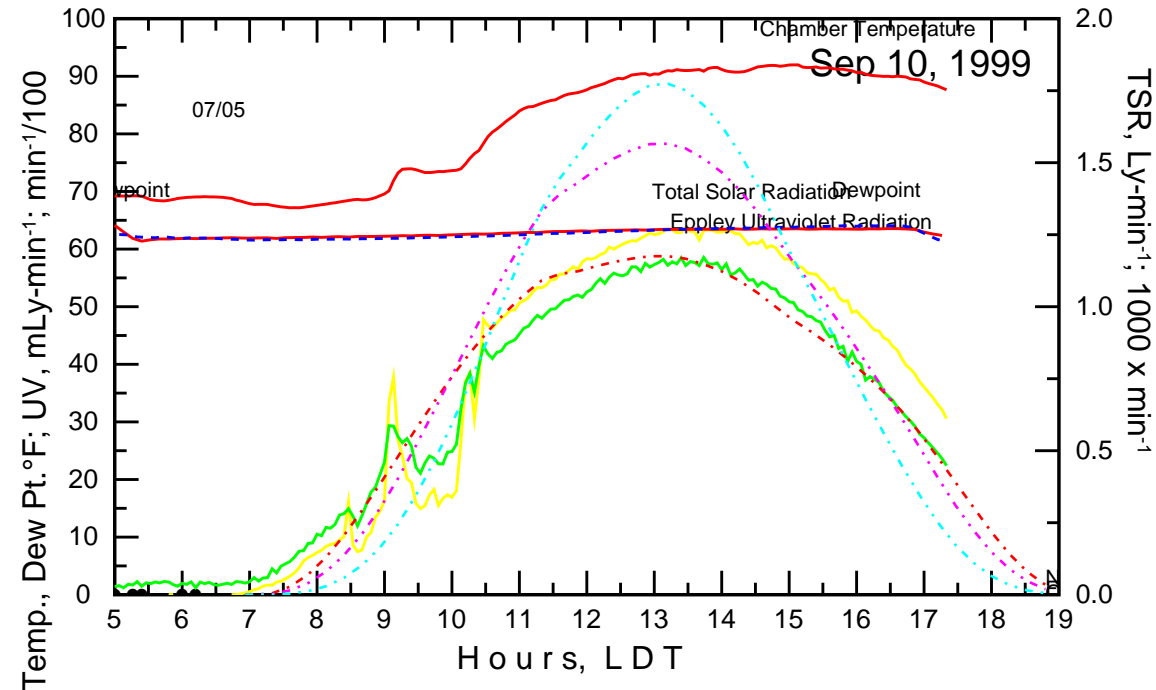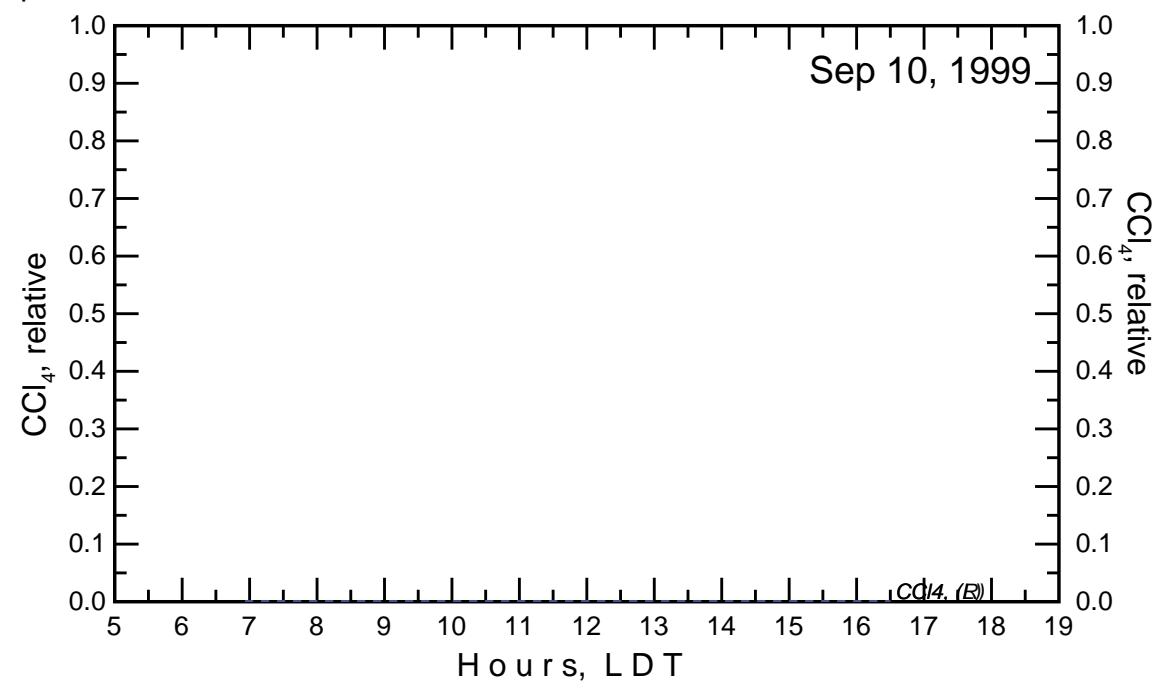

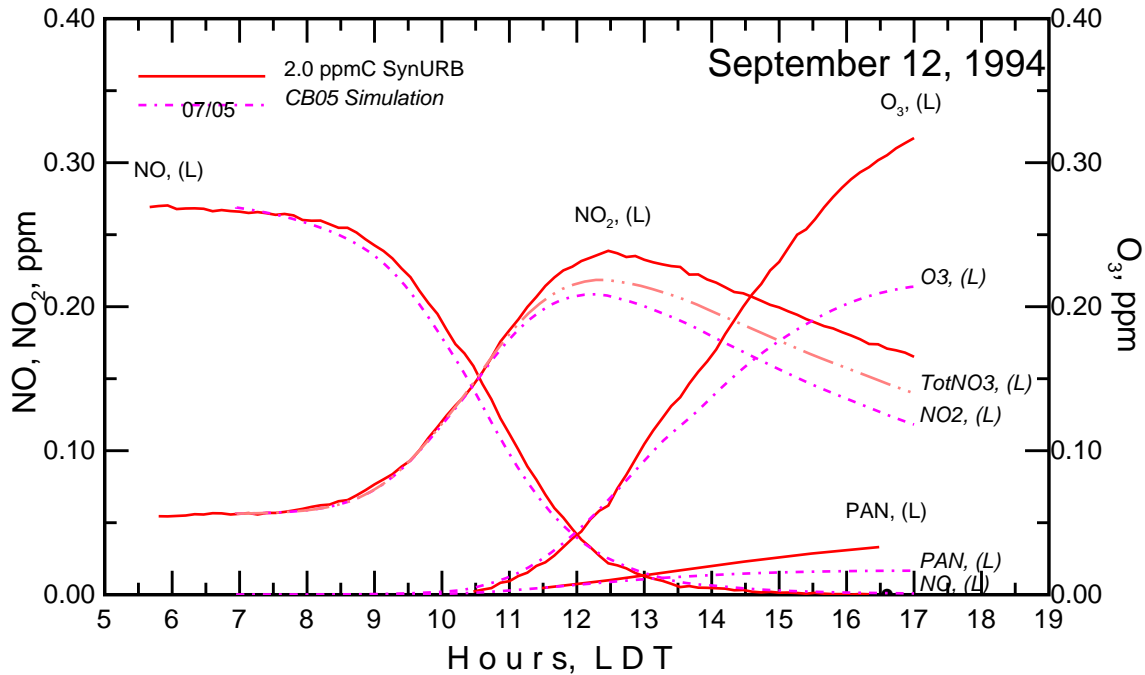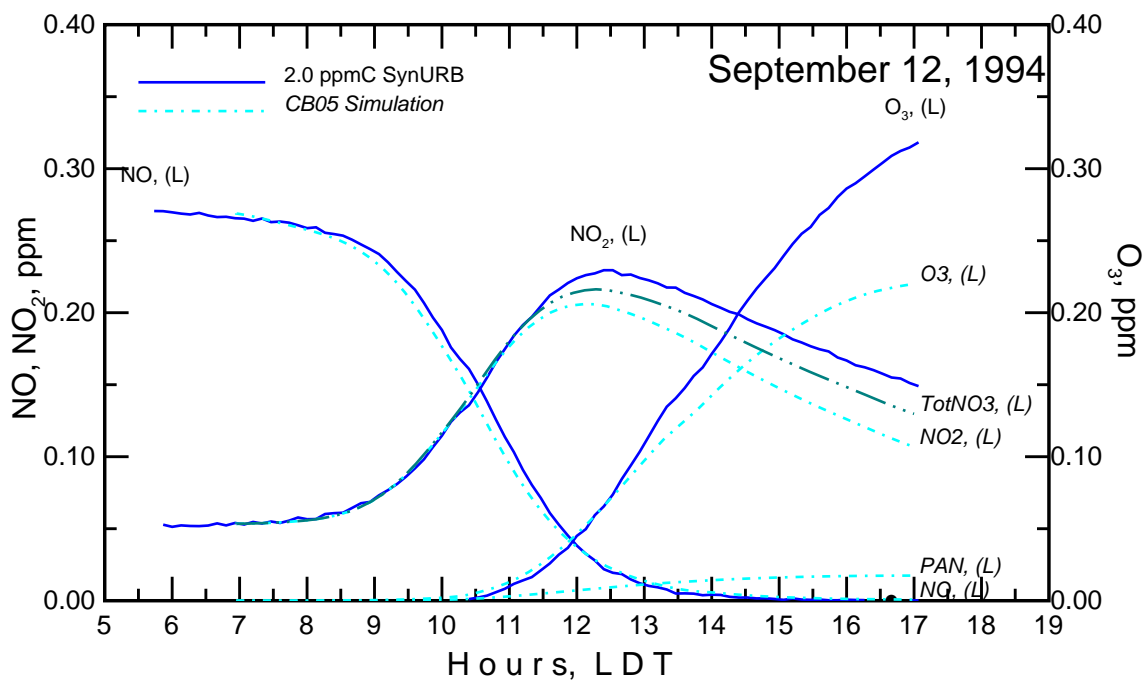

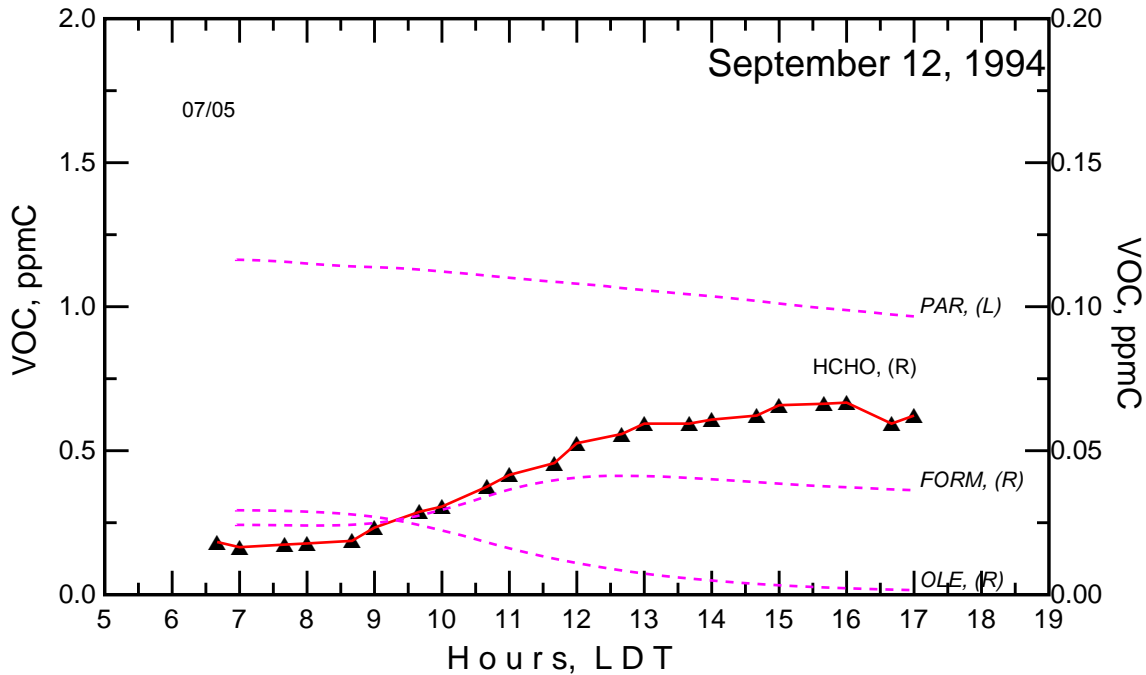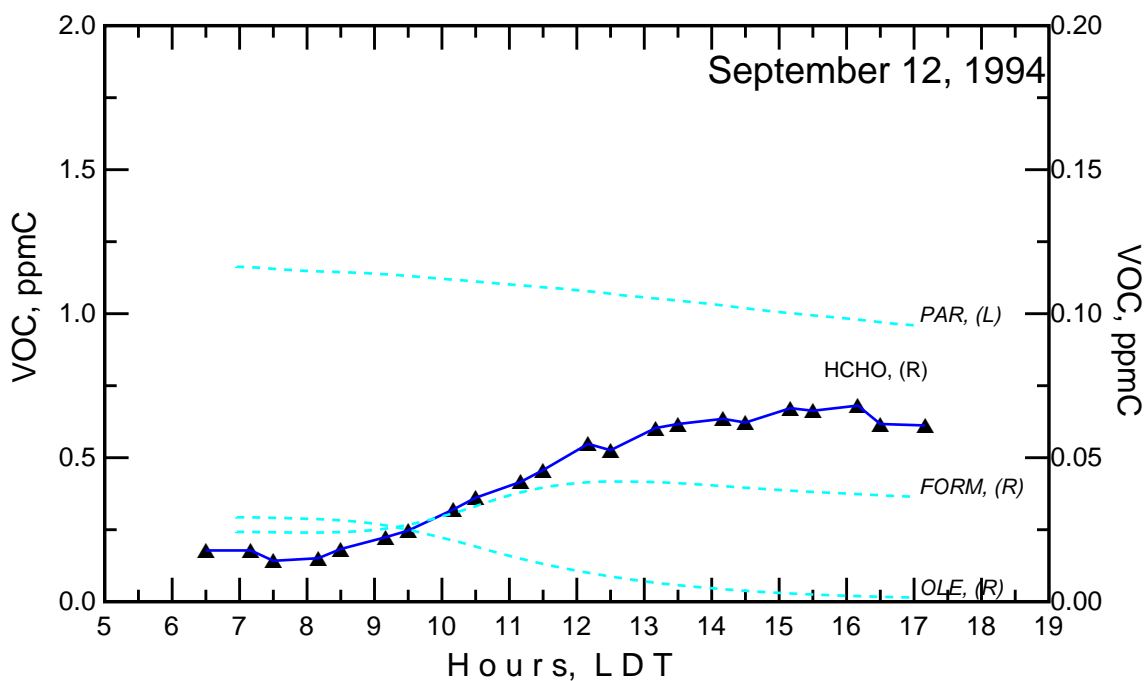

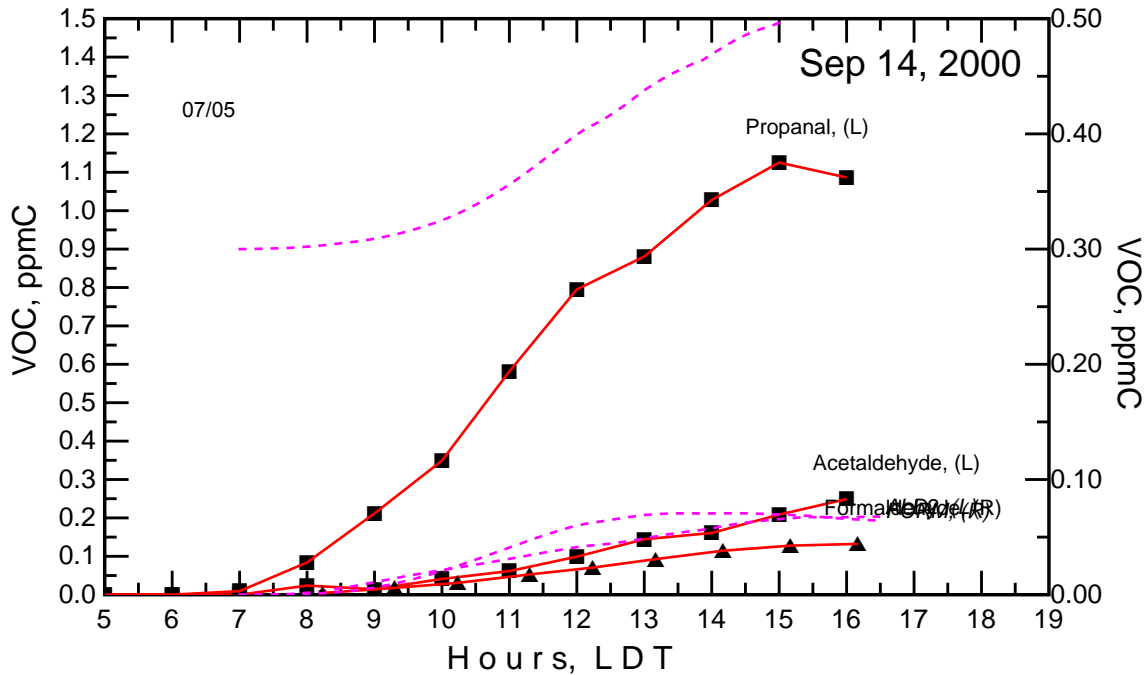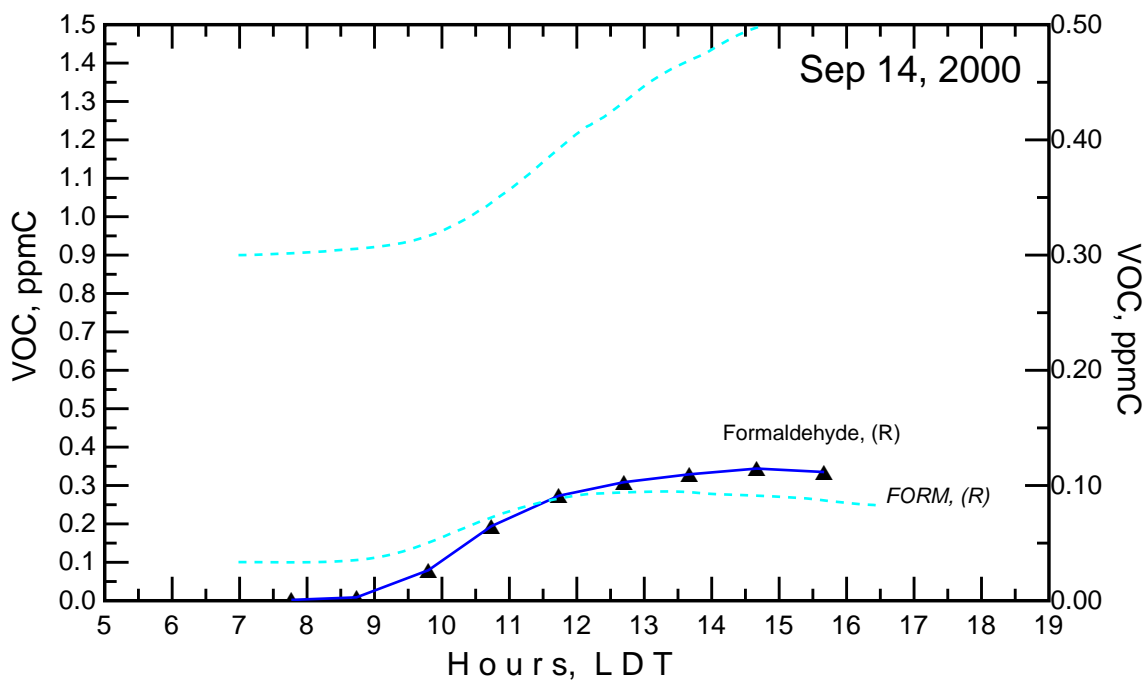

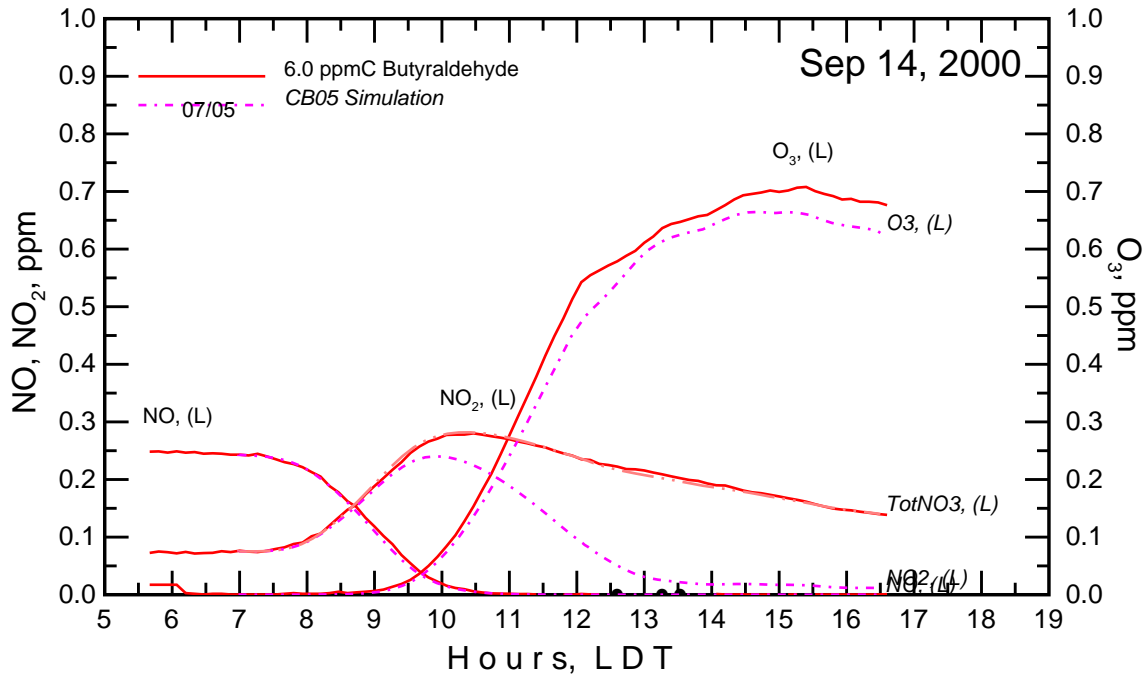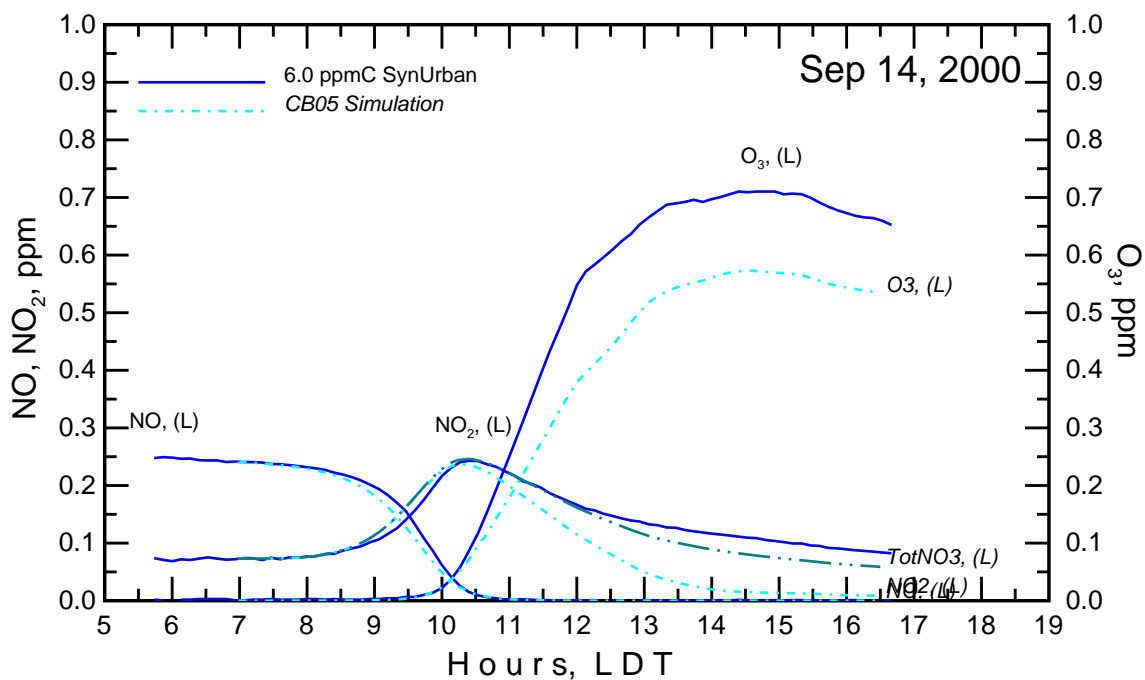

Butyraldehyde vs SynUrban; matched NOx

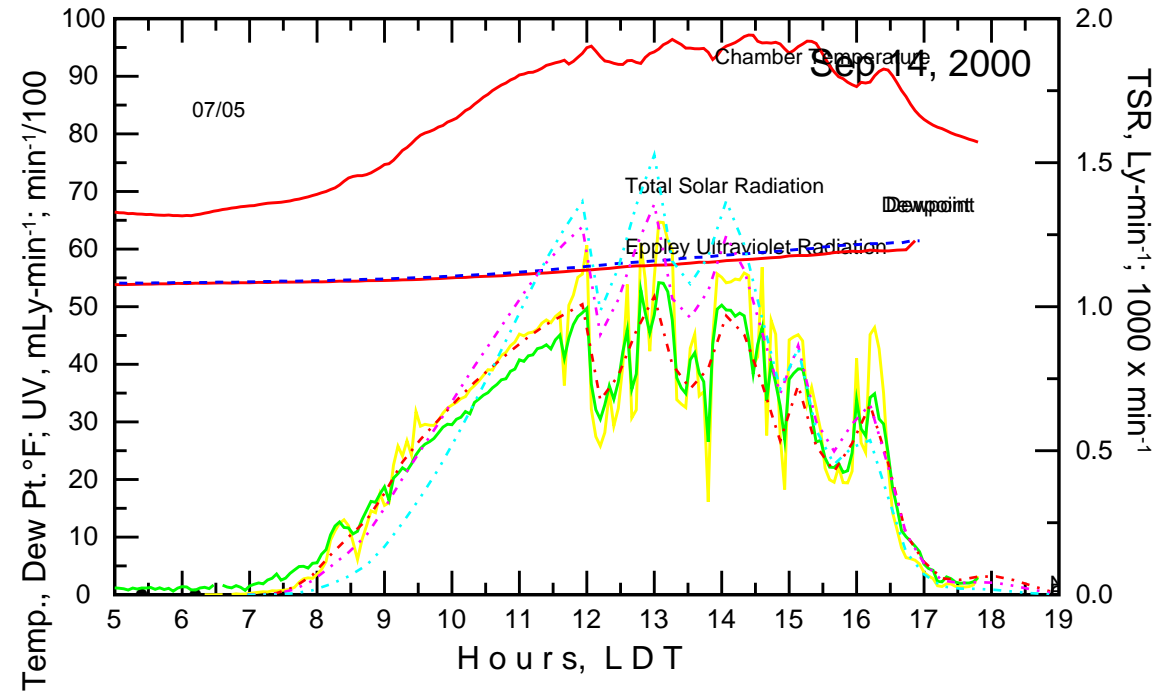

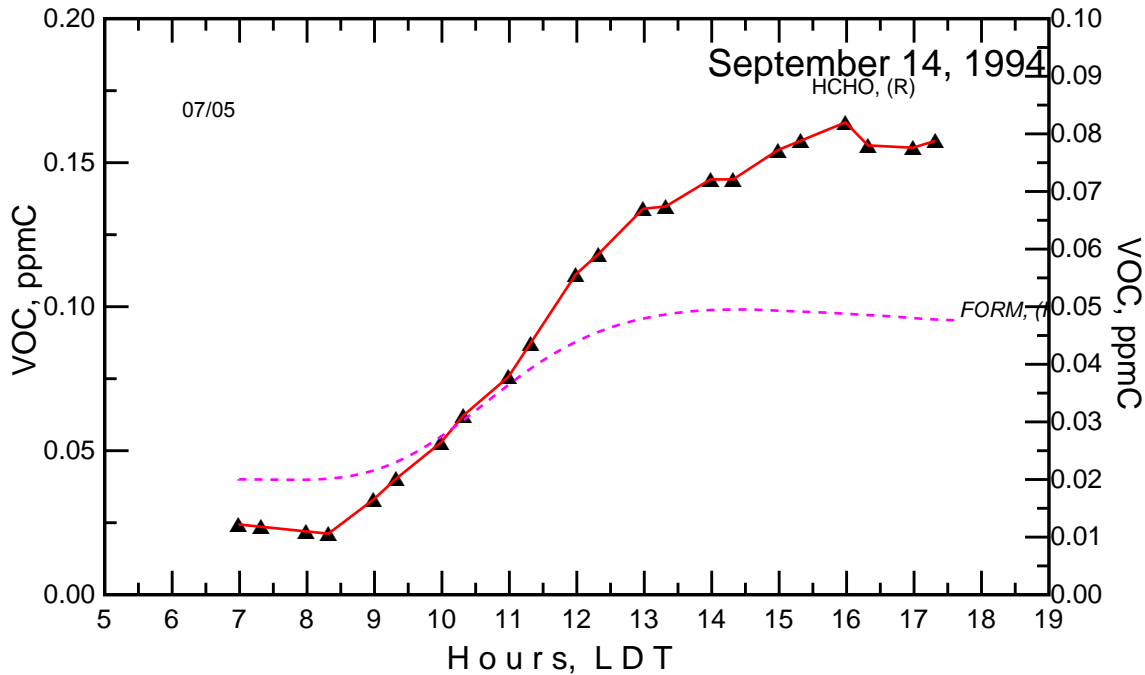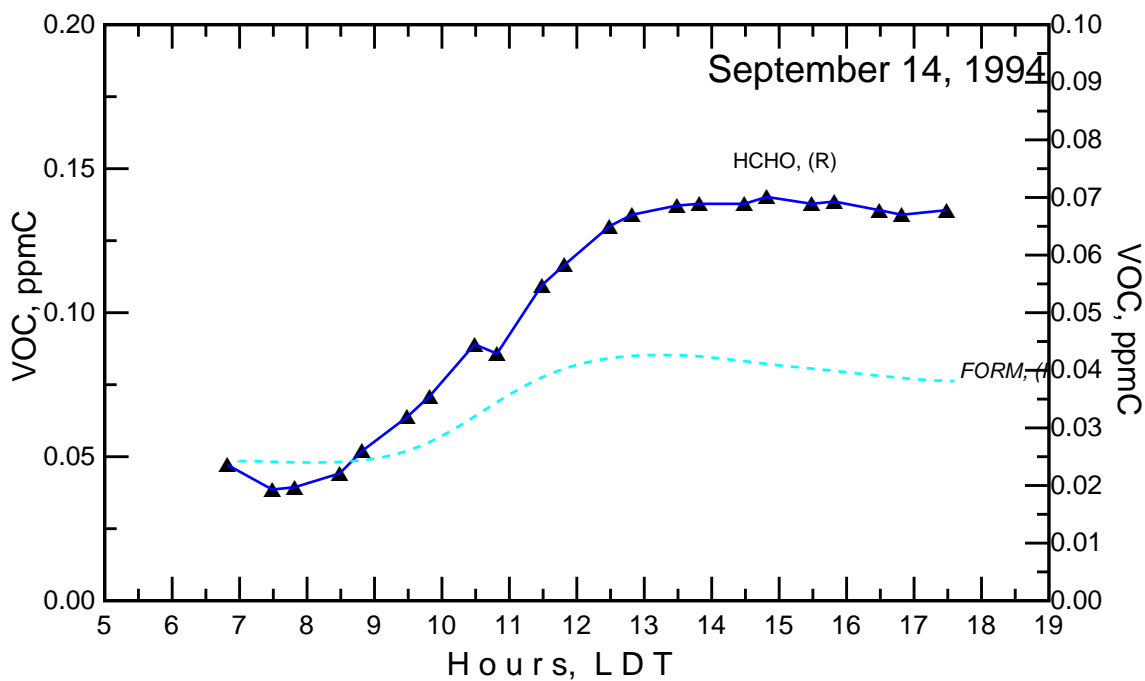

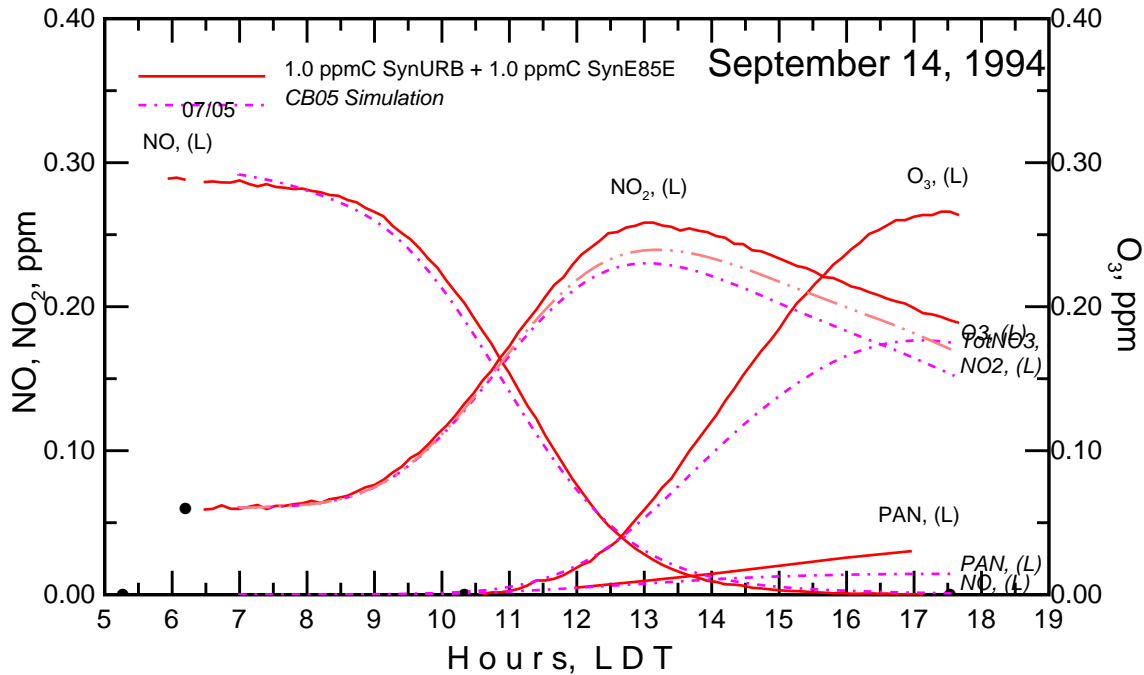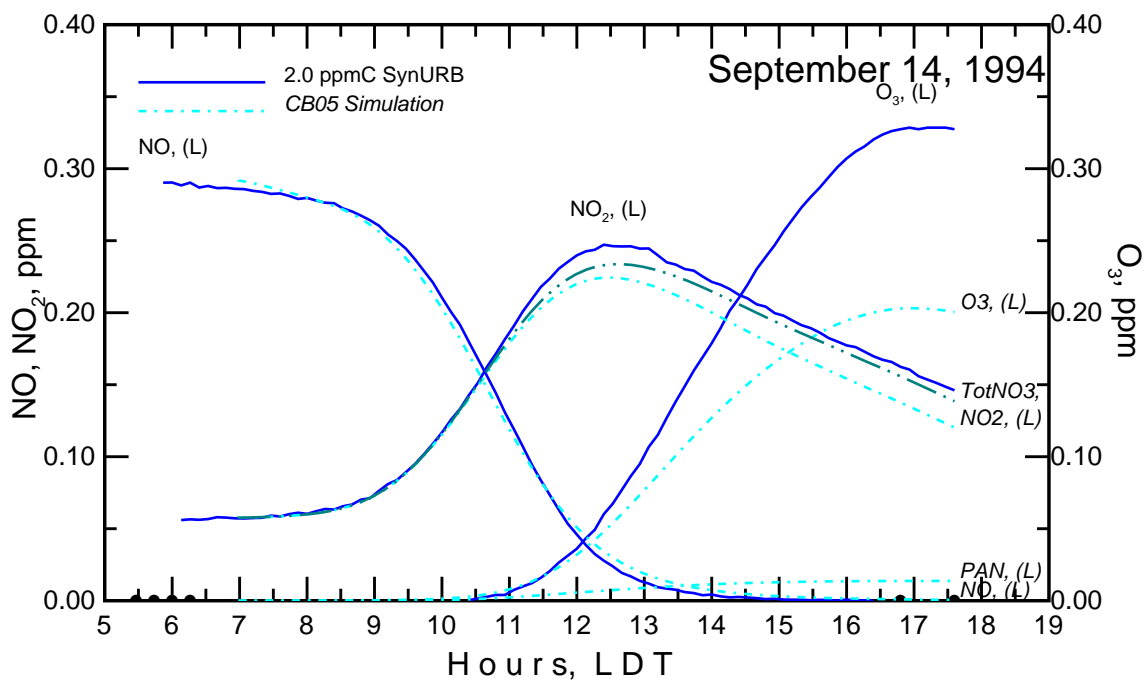

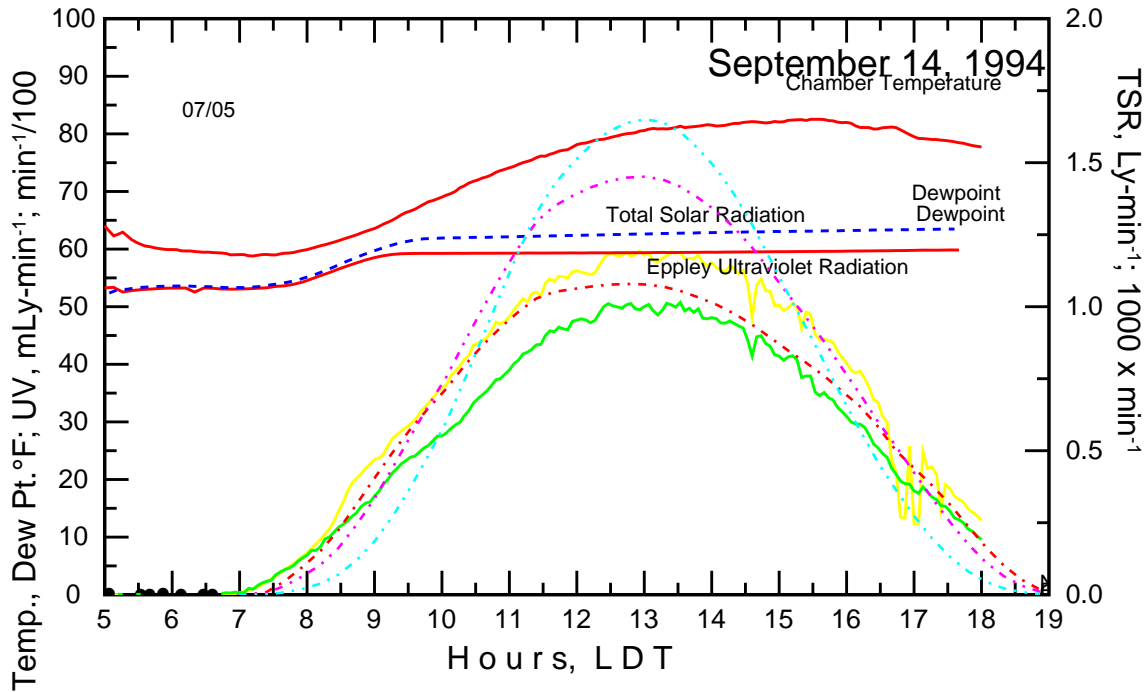

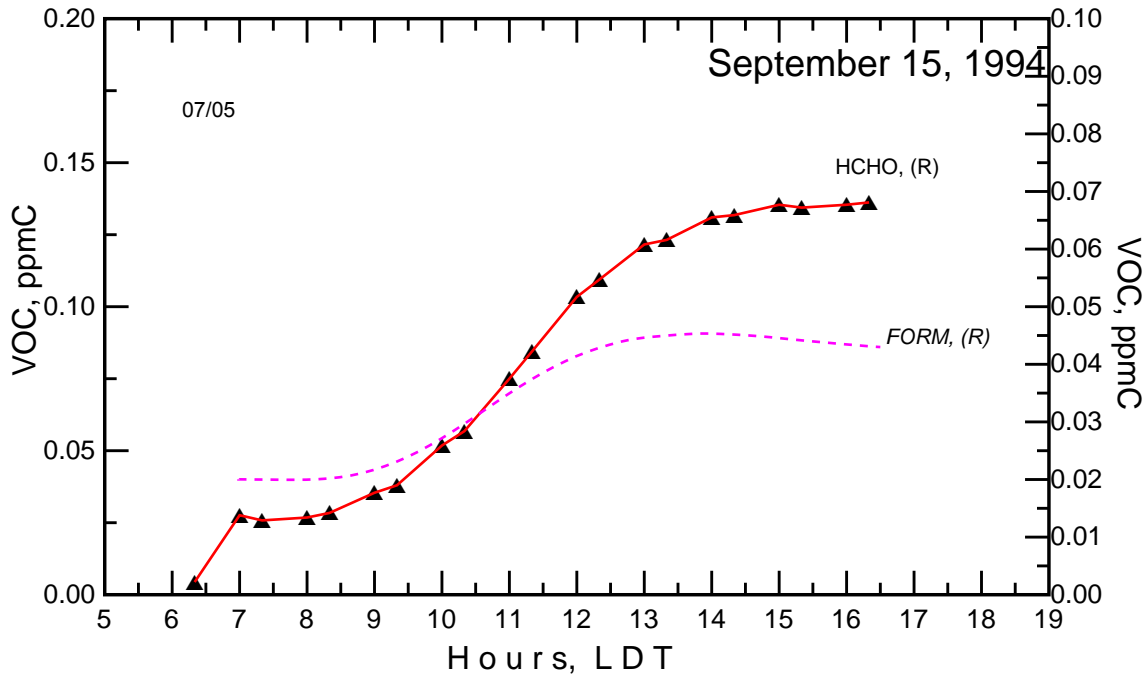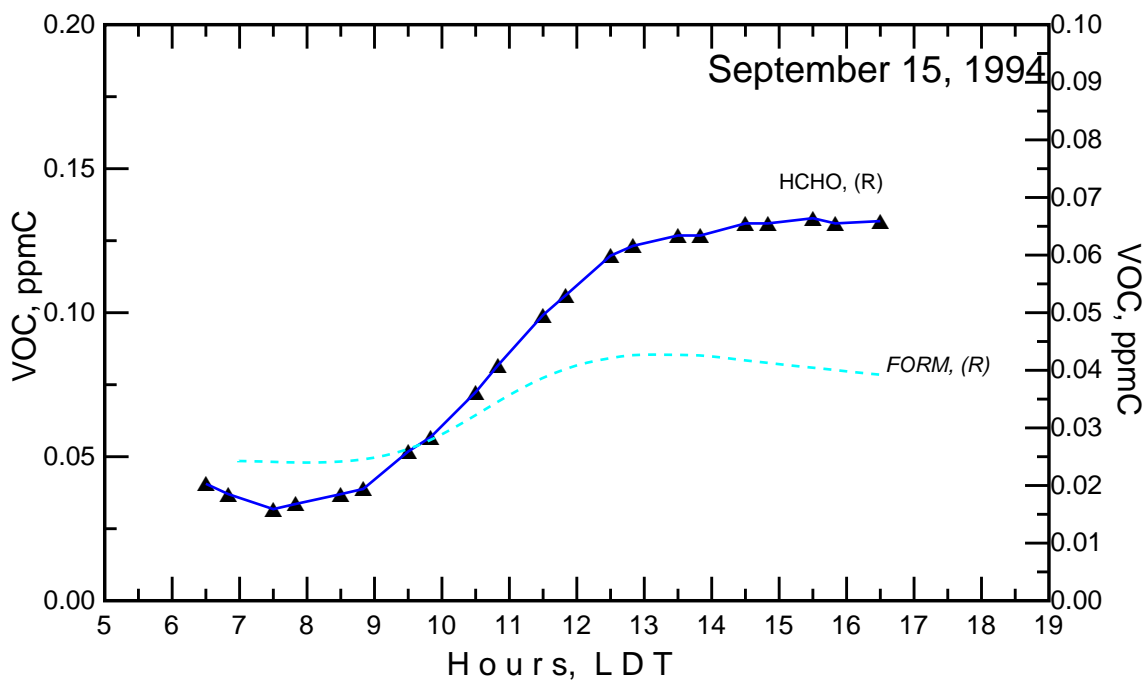

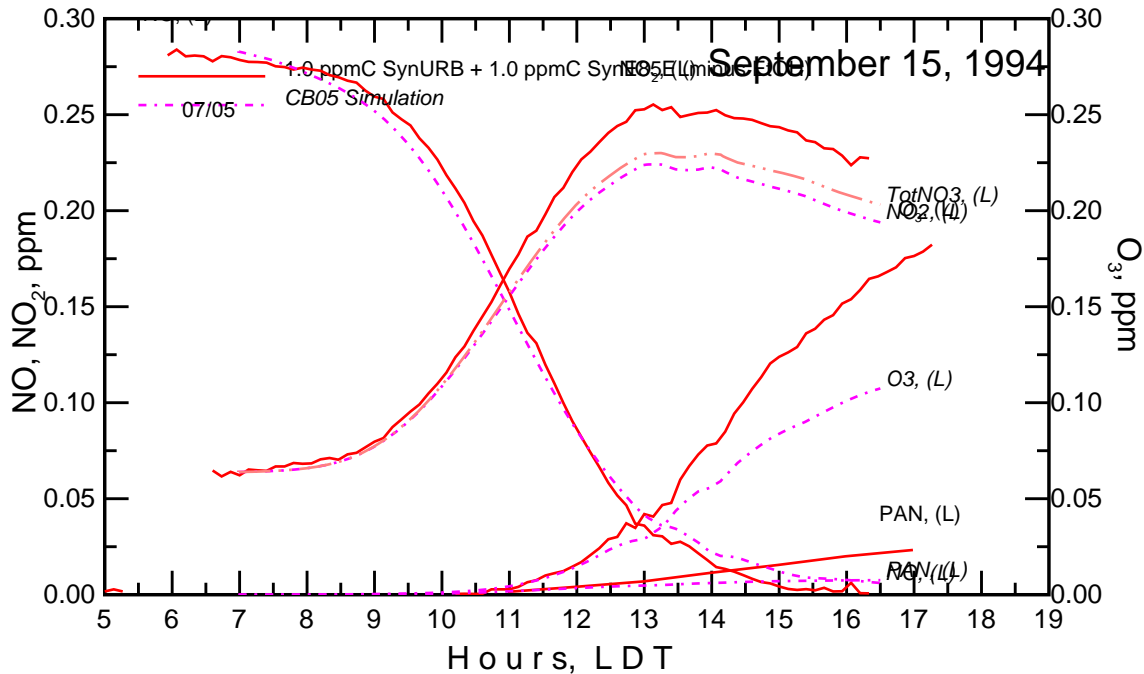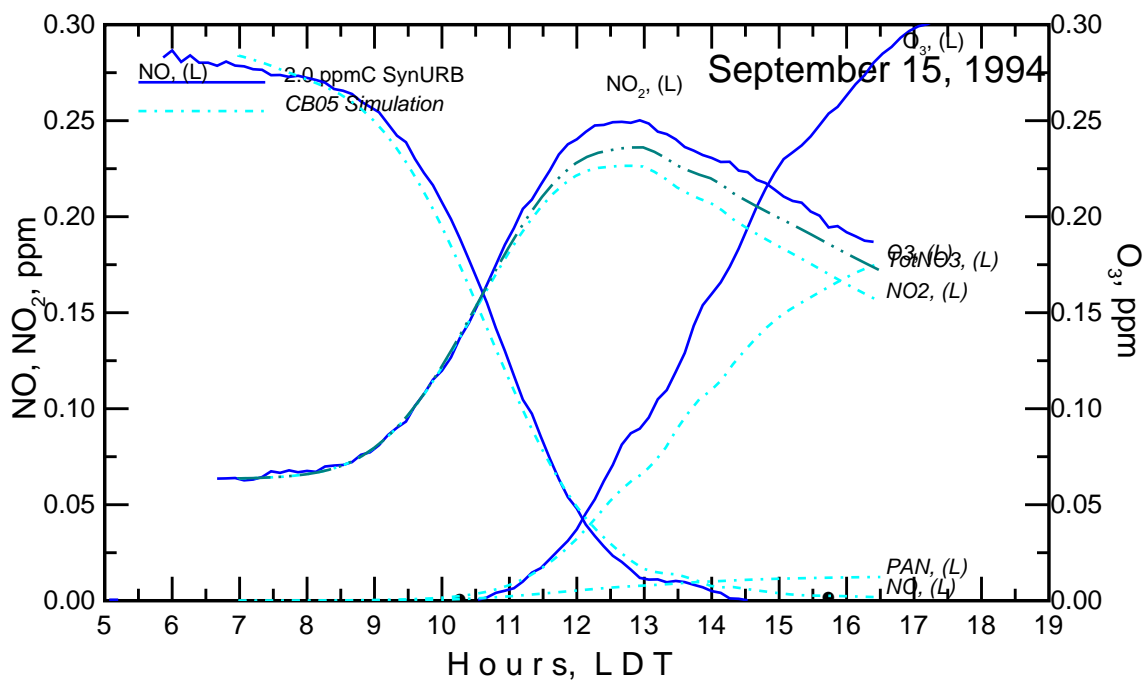

SynURB vs SynURB/SynE85 (no EtOH)

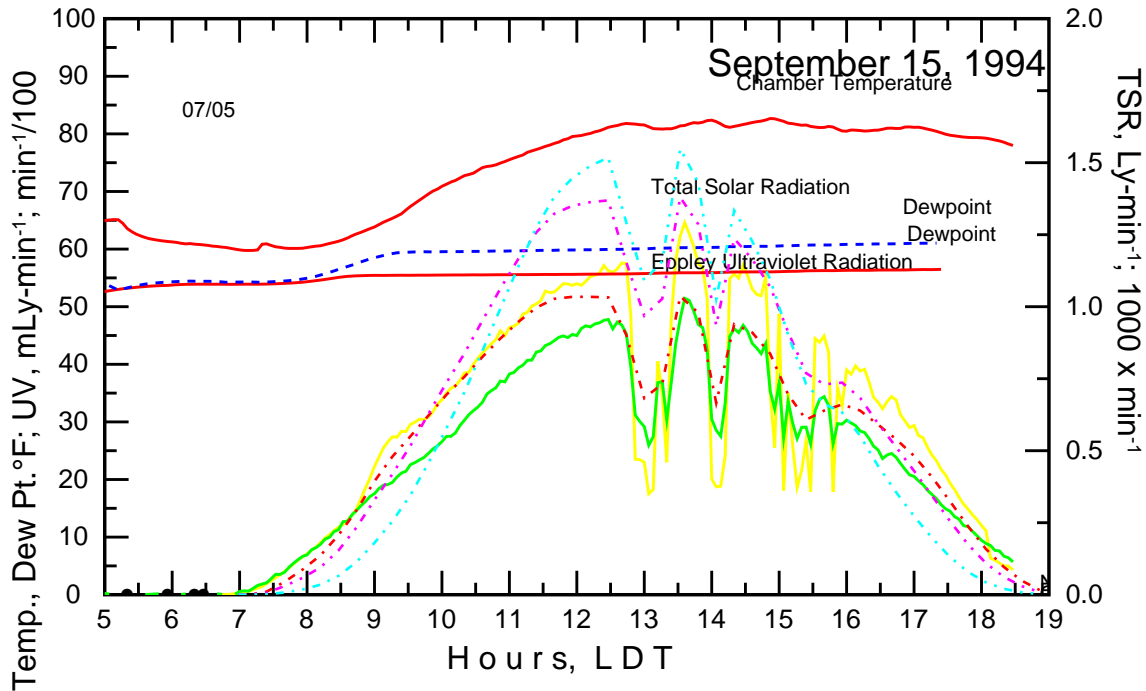

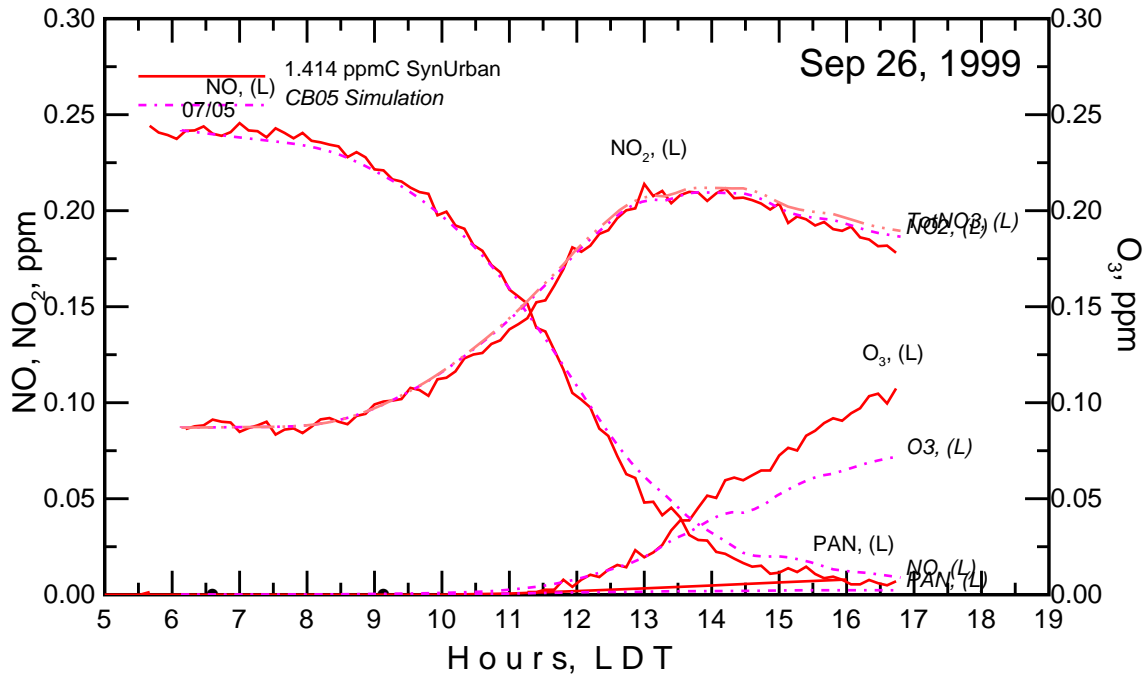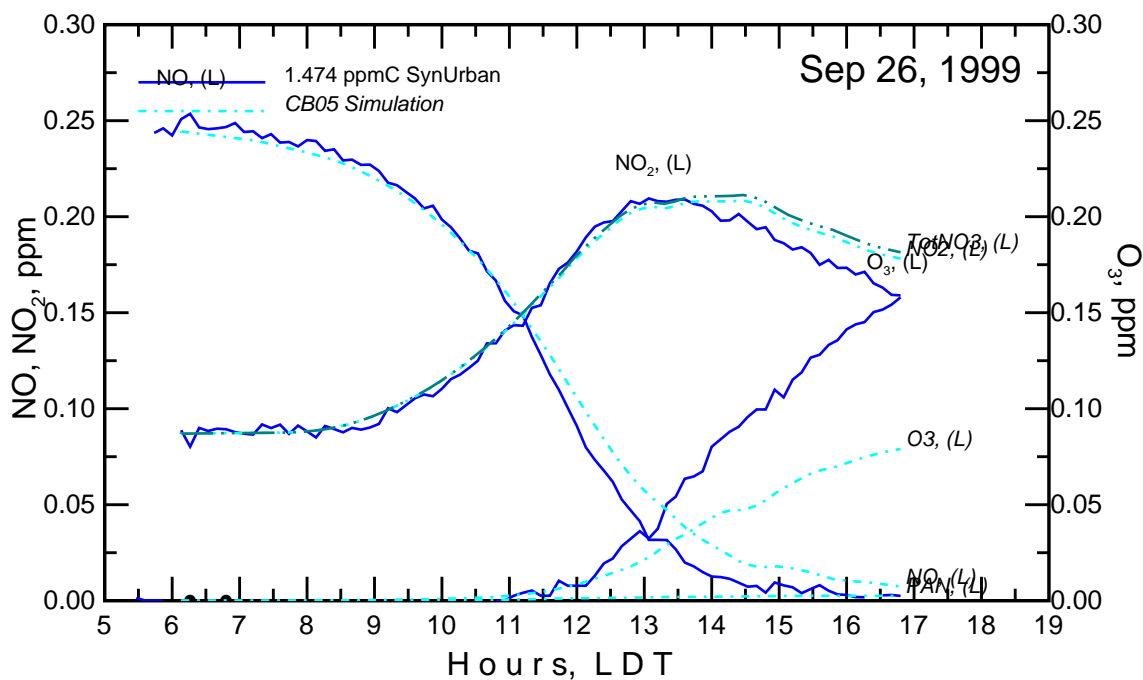

4% SynUrban Difference; Matched NO<sub>x</sub>

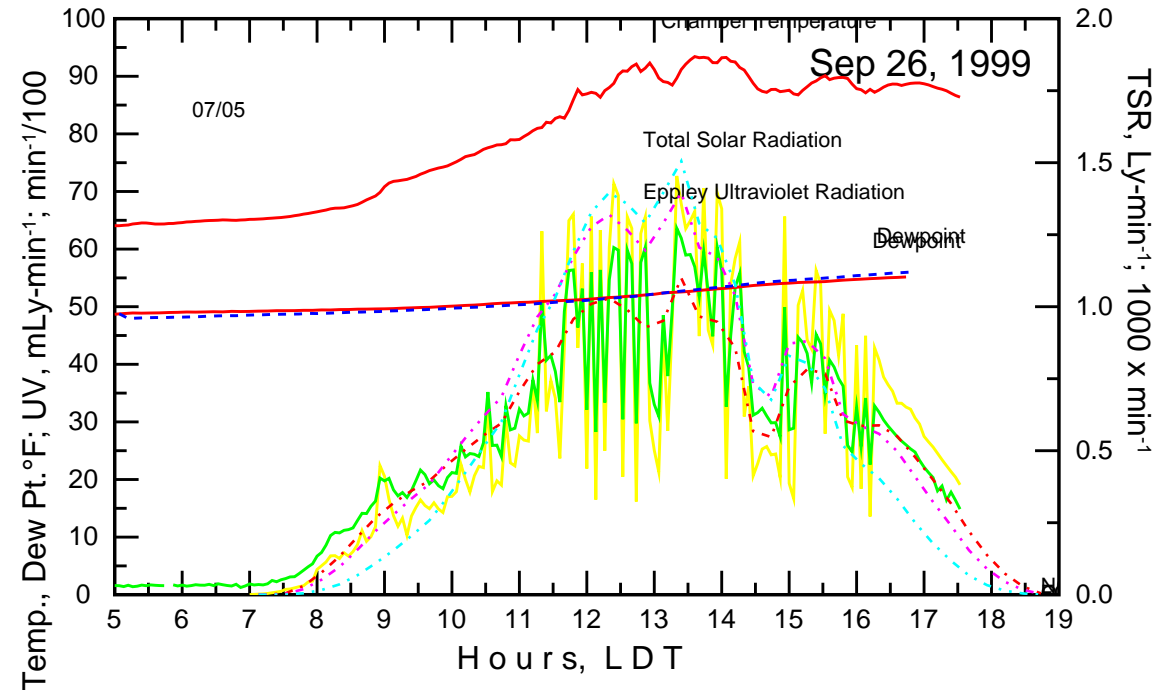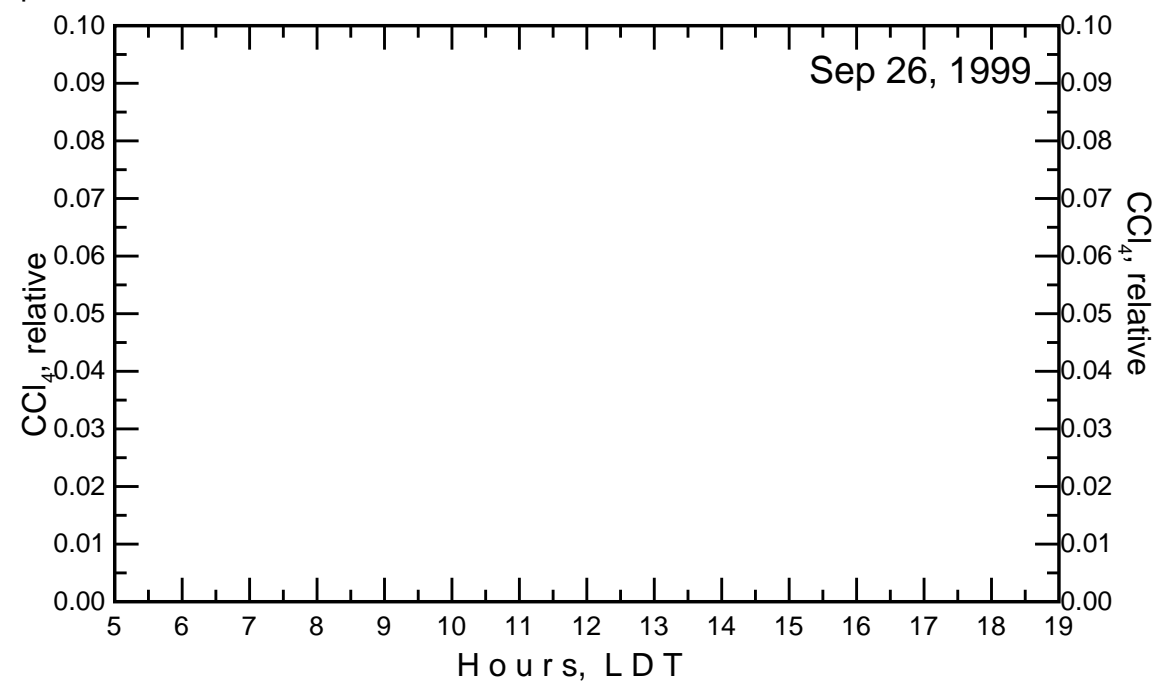

Supplement: Supplementary file 2 [file gmd-2016-175-supplement.zip]
