# Supplementary material for: The Framework for 0-D Atmospheric Modeling (F0AM) v3.1
Source: Copernicus journal article supplement (doi:10.5194/gmd-2016-175), 2016-07-08
Supplement: Supplementary file 1 [file gmd-2016-175-supplement.zip]

# New isoprene scheme

From Geos-chem

**This page is for documentation of the isoprene chemistry mechanism (cf. Fabien Paulot) included in GEOS-Chem v9-02. This update was tested in the 1-month benchmark simulation v9-02g and approved on 24 Mar 2013.**

**Previous page of description can be found here [New isoprene scheme prelim.](#)**

**— Bob Yantosca, 28 May 2014**

## Contents

- 1 Implementation of the Paulot isoprene scheme
- 2 Species information
  - 2.1 Species
  - 2.2 Species emitted and deposited
  - 2.3 Henry's law constant
- 3 Reactions
  - 3.1 New reactions
  - 3.2 RIP+OH
- 4 Updates to the Paulot isoprene scheme
  - 4.1 NO<sub>3</sub> aerosol reactive uptake coefficient
  - 4.2 Update One - RO<sub>2</sub>+HO<sub>2</sub> Reaction Rate
  - 4.3 Update Two - Transport of RIP
  - 4.4 Updates 02/04/2013
- 5 Updates to be implemented
  - 5.1 Remove duplicate GLYX product from RIO<sub>2</sub> reaction
- 6 References

## Implementation of the Paulot isoprene scheme

This chemistry is largely based on Paulot et al.(2009a, ACP) for high-NO<sub>x</sub> regime and Paulot et al.(2009b, Science) for low-NO<sub>x</sub> regime. Other additions include:

1. Isomerization of RIO<sub>2</sub> based on Peeters et al. (2009, 2010) and Crounse et al. (2011).
2. Isomerization of MRO<sub>2</sub> based on Crounse et al. (2012).
3. Nighttime isoprene oxidation based on Rollins et al. (2009) and Xie et al. (2012).
4. Updates to the reactions of isoprene nitrates + O<sub>3</sub> based on Lockwood et al. (2010).

Evaluation of this chemical mechanism is described here (<http://dx.doi.org/10.1002/jgrd.50817>). If you have any questions, please let us know (Fabien Paulot (<mailto:paulot@seas.harvard.edu>), Jingqiu Mao (<mailto:jmao@seas.harvard.edu>)).

--Bob Y. 13:47, 12 May 2014 (EDT)

## Species information

The following tables list the species that comprise the Paulot isoprene chemistry mechanism:

### Species

| Species | Formula                                            | Note                                                       |
|---------|----------------------------------------------------|------------------------------------------------------------|
| A3O2    | CH <sub>3</sub> CH <sub>2</sub> CH <sub>2</sub> OO | primary RO <sub>2</sub> from C <sub>3</sub> H <sub>8</sub> |
| ACET    | CH <sub>3</sub> C(O)CH <sub>3</sub>                | acetone                                                    |
|         |                                                    |                                                            |

|                               |                                                                             |                                                              |
|-------------------------------|-----------------------------------------------------------------------------|--------------------------------------------------------------|
| ACTA                          | CH <sub>3</sub> C(O)OH                                                      | acetic acid                                                  |
| ALD2                          | CH <sub>3</sub> CHO                                                         | acetaldehyde                                                 |
| ALK4                          | RH                                                                          | ≥C <sub>4</sub> alkanes                                      |
| ATO2                          | CH <sub>3</sub> C(O)CH <sub>2</sub> O <sub>2</sub>                          | RO <sub>2</sub> from acetone                                 |
| ATOOH                         | CH <sub>3</sub> C(O)CH <sub>2</sub> OOH                                     | ATO <sub>2</sub> peroxide                                    |
| B3O2                          | CH <sub>3</sub> CH(OO)CH <sub>3</sub>                                       | secondary RO <sub>2</sub> from C <sub>3</sub> H <sub>8</sub> |
| C <sub>2</sub> H <sub>6</sub> | C <sub>2</sub> H <sub>6</sub>                                               | ethane                                                       |
| C <sub>3</sub> H <sub>8</sub> | C <sub>3</sub> H <sub>8</sub>                                               | propane                                                      |
| CH <sub>2</sub> O             | CH <sub>2</sub> O                                                           | formaldehyde                                                 |
| CH <sub>4</sub>               | CH <sub>4</sub>                                                             | methane                                                      |
| CO                            | CO                                                                          | carbon monoxide                                              |
| CO <sub>2</sub>               | CO <sub>2</sub>                                                             | carbon dioxide                                               |
| DHMOB                         | HOCH <sub>2</sub> C(CH <sub>3</sub> )(OH)C(=O)CHO                           | See Paulot et al., ACP (2009)                                |
| DIBOO                         |                                                                             | Dibble peroxy radical                                        |
| EOH                           | C <sub>2</sub> H <sub>5</sub> OH                                            | ethanol                                                      |
| ETHLN                         | CHOCH <sub>2</sub> ONO <sub>2</sub>                                         | Ethanal nitrate                                              |
| ETO <sub>2</sub>              | CH <sub>3</sub> CH <sub>2</sub> O <sub>2</sub>                              | ethylperoxy radical                                          |
| ETP                           | CH <sub>3</sub> CH <sub>2</sub> OOH                                         | ethylhydroperoxide                                           |
| GLYC                          | HOCH <sub>2</sub> CHO                                                       | glycoaldehyde (hydroxyacetaldehyde)                          |
| GLYX                          | CHOCHO                                                                      | glyoxal                                                      |
| H <sub>2</sub>                | H <sub>2</sub>                                                              | hydrogen atom                                                |
| H <sub>2</sub> O              | H <sub>2</sub> O                                                            | water vapor                                                  |
| H <sub>2</sub> O <sub>2</sub> | H <sub>2</sub> O <sub>2</sub>                                               | hydrogen peroxide                                            |
| HAC                           | HOCH <sub>2</sub> C(O)CH <sub>3</sub>                                       | hydroxyacetone                                               |
| HCOOH                         | HCOOH                                                                       | formic acid                                                  |
| HC <sub>5</sub>               | HOCH <sub>2</sub> CH=C(CH <sub>3</sub> )CHO                                 | Hydroxycarbonyl with 5C                                      |
| HC <sub>5</sub> OO            |                                                                             | Peroxy radical from HC <sub>5</sub> (old IAO <sub>2</sub> ?) |
| HNO <sub>2</sub>              | HONO                                                                        | nitrous acid                                                 |
| HNO <sub>3</sub>              | HNO <sub>3</sub>                                                            | nitric acid                                                  |
| HNO <sub>4</sub>              | HNO <sub>4</sub>                                                            | pernitric acid                                               |
| HO <sub>2</sub>               | HO <sub>2</sub>                                                             | hydroperoxyl radical                                         |
| IALD                          | HOCH <sub>2</sub> C(CH <sub>3</sub> )=CHCHO                                 | hydroxy carbonyl alkenes from isoprene                       |
| IAP                           | HOCH <sub>2</sub> C(CH <sub>3</sub> )(OOH)CH(OH)CHO                         | peroxide from IAO <sub>2</sub>                               |
| IEPOX                         |                                                                             | Isoprene epoxide                                             |
| IEPOXOO                       |                                                                             | RO <sub>2</sub> from IEPOX                                   |
| INO <sub>2</sub>              | O <sub>2</sub> NOCH <sub>2</sub> C(OO)(CH <sub>3</sub> )CH=CH <sub>2</sub>  | RO <sub>2</sub> from ISOP+NO <sub>3</sub>                    |
| INPN                          | O <sub>2</sub> NOCH <sub>2</sub> C(OOH)(CH <sub>3</sub> )CH=CH <sub>2</sub> | peroxide from INO <sub>2</sub>                               |
| ISN1                          |                                                                             | nighttime isoprene nitrate                                   |
| ISNOOA                        |                                                                             | peroxy radical from ISN1                                     |
| ISNOOB                        |                                                                             | peroxy radical from ISN1                                     |
|                               |                                                                             |                                                              |

|         |                               |                                                        |
|---------|-------------------------------|--------------------------------------------------------|
| ISNOHOO |                               | peroxy radical from ISN1                               |
| ISNP    | HOCH2C(OOH)(CH3)CH(ONO2)CH2OH | peroxide from ISOPNBO2 and ISOPNDO2                    |
| ISOP    | CH2=C(CH3)CH=CH2              | isoprene                                               |
| ISOPNB  | C5H9NO4                       | Isoprene nitrate Beta                                  |
| ISOPND  | C5H9NO4                       | Isoprene nitrate Delta                                 |
| KO2     | RO2 from >3 ketones           | RO2 from >3 ketones                                    |
| M       |                               | for three body reactions                               |
| MACR    | CH2=C(CH3)CHO                 | methacrolein                                           |
| MACRN   | HOCH2C(ONO2)(CH3)CHO          | Nitrate from MVK                                       |
| MAN2    | HOCH2C(ONO2)(CH3)CHO          | RO2 from MACR+NO3                                      |
| MAO3    | CH2=C(CH3)C(O)OO              | peroxyacyl from MVK and MACR                           |
| MAOP    | CH2=C(CH3)C(O)OOH             | peroxide from MAO3                                     |
| MAOPO2  | CH2OH-CHOO*CH3C(O)OOH         | Peroxy radical from MAOP (addition on the double bond) |
| MAP     | CH3C(O)OOH                    | peroxyacetic acid                                      |
| MCO3    | CH3C(O)OO                     | peroxyacetyl radical                                   |
| MEK     | RC(O)R                        | >3 ketones                                             |
| MGLY    | CH3COCHO                      | methylglyoxal                                          |
| MNO3    | CH3ONO2                       | methylnitrate                                          |
| MOBA    | HOC(=O)C(CH3)=CHCHO           | 5C acid from isoprene                                  |
| MOBAOO  |                               | RO2 from MOBA                                          |
| MO2     | CH3O2                         | methylperoxy radical                                   |
| MOH     | CH3OH                         | methanol                                               |
| MP      | CH3OOH                        | methylhydroperoxide                                    |
| MRO2    | HOCH2C(OO)(CH3)CHO            | RO2 from MACR+OH                                       |
| MRP     | HOCH2C(OOH)(CH3)CHO           | peroxide from MRO2                                     |
| MVK     | CH2=CHC(=O)CH3                | methylvinylketone                                      |
| MVKN    | HOCH2CH(ONO2)C(=O)CH3         | Nitrate from MACR                                      |
| N2      | N2                            | nitrogen                                               |
| N2O     | N2O                           | nitrous oxide                                          |
| N2O5    | N2O5                          | dinitrogen pentoxide                                   |
| NH2     | NH2                           | ammonia radical                                        |
| NH3     | NH3                           | ammonia                                                |
| NO      | NO                            | nitric oxide                                           |
| NO2     | NO2                           | nitrogen dioxide                                       |
| NO3     | NO3                           | nitrate radical                                        |
| O2      | O2                            | molecular oxygen                                       |
| O2CH2OH | O2CH2OH                       | produced by CH2O+HO2                                   |
| O3      | O3                            | ozone                                                  |
| OH      | OH                            | hydroxyl radical                                       |
| PAN     | CH3C(O)OONO2                  | peroxyacetylnitrate                                    |
| PMN     | CH2=C(CH3)C(O)OONO2           | peroxymethacryloyl nitrate (MPAN)                      |

|           |                        |                                                         |
|-----------|------------------------|---------------------------------------------------------|
| PO2       | HOCH2CH(OO)CH3         | RO2 from isoprene                                       |
| PP        | HOCH2CH(OOH)CH3        | peroxide from PO2                                       |
| PPN       | CH3CH2C(O)OONO2        | peroxypropionyl nitrate                                 |
| PRN1      | O2NOCH2CH(OO)CH3       | RO2 from propene + NO3                                  |
| PRPE      | C3H6                   | ≥C4 alkenes                                             |
| PRPN      | O2NOCH2CH(OOH)CH3      | peroxide from PRN1                                      |
| PROPNN    | CH3C(=O)CH2ONO2        | Propanone nitrate                                       |
| PYAC      | CH3COCO OH             | Pyruvic acid                                            |
| R4N1      | RO2 from R4N2          | RO2 from R4N2                                           |
| R4N2      | RO2NO                  | ≥C4 alkyl nitrates                                      |
| R4O2      | RO2 from ALK4          | RO2 from ALK4                                           |
| R4P       | CH3CH2CH2CH2OOH        | peroxide from R4O2                                      |
| RA3P      | CH3CH2CH2OOH           | peroxide from A3O2                                      |
| RB3P      | CH3CH(OOH)CH3          | peroxide from B3O2                                      |
| RCHO      | CH3CH2CHO              | >C2 aldehydes                                           |
| RCO3      | CH3CH2C(O)OO           | peroxypropionyl radical                                 |
| RCOOH     | C2H5C(O)OH             | >C2 organic acids                                       |
| RIO1      | HOCH2C(OO)(CH3)CH=CHOH | RO2 from isoprene oxidation products                    |
| RIO2      | HOCH2C(OO)(CH3)CH=CH2  | RO2 from isoprene (named as ISOPO2 in the literature)   |
| RIP       | HOCH2C(OOH)(CH3)CH=CH2 | peroxide from RIO2 (named as ISOPOOH in the literature) |
| ROH       | C3H7OH                 | >C2 alcohols                                            |
| RP        | CH3CH2C(O)OOH          | peroxide from RCO3                                      |
| VRO2      | HOCH2CH(OO)C(O)CH3     | RO2 from MVK+OH                                         |
| VRP       | HOCH2CH(OOH)C(O)CH3    | peroxide from VRO2                                      |
| DMS       | (CH3)2S                | dimethylsulfide                                         |
| SO2       | SO2                    | sulfur dioxide                                          |
| SO4       | SO4                    | sulfate radical                                         |
| MSA       | CH4SO3                 | methanesulfonic acid                                    |
| DRYDEP    |                        | generic entry for dry dep                               |
| DRYPMNN   |                        | Dry deposition for the different species                |
| DRYALPH   |                        |                                                         |
| DRYLIMO   |                        |                                                         |
| DRYISOPND |                        |                                                         |
| DRYISOPNB |                        |                                                         |
| DRYRIP    |                        |                                                         |
| DRYIEPOX  |                        |                                                         |
| DRYMACRN  |                        |                                                         |
| DRYMVKN   |                        |                                                         |
| DRYPROPNN |                        |                                                         |
| DRYHCOOH  |                        |                                                         |
| DRYACTA   |                        |                                                         |

|          |                               |
|----------|-------------------------------|
| EMISSION | generic entry to do emissions |
|----------|-------------------------------|

--Bob Y. 13:46, 12 May 2014 (EDT)

### Species emitted and deposited

| Species emitted | Species deposited |
|-----------------|-------------------|
| NO              | NO2               |
| NO2             | O3                |
| CO              | PAN               |
| ALK4            | HNO3              |
| ISOP            | CH2O              |
| ACET            | N2O5              |
| PRPE            | H2O2              |
| C3H8            | PMN               |
| C2H6            | PPN               |
| MEK             | R4N2              |
| ALD2            |                   |
| CH2O            | PMNN              |
| HNO3            | IEPOX             |
| O3              | RIP               |
|                 | ISOPND            |
|                 | ISOPNB            |
|                 | PROPNN            |
|                 | MACRN             |
|                 | MVKN              |
|                 | HCOOH             |
|                 | ACTA              |
|                 | HAC               |
|                 | ALD2              |

--Bob Y. 13:46, 12 May 2014 (EDT)

### Henry's law constant

This is effective Henry's law constant for water near neutral pH, mainly from Wesley et al. (1989). So the value would be different when you put in wetscav\_mod.F.

| Species | H*(moles L-1 atm-1 ) | $\Delta H/R$ (K) | Reactivity factor (f0) | Reference |
|---------|----------------------|------------------|------------------------|-----------|
| NO2     | 0.01                 |                  | 0.1                    |           |
| Ox      | 0.01                 |                  | 1.0                    |           |
| PAN     | 3.6                  |                  | 1.0                    |           |
| HNO3    | 1.0d+14              |                  | 0.0                    |           |
| H2O2    | 1.0d+5               |                  | 1.0                    |           |
| PMN     | as PAN               |                  |                        |           |

|            |         |       |     |                                 |
|------------|---------|-------|-----|---------------------------------|
| PPN        | as PAN  |       |     |                                 |
| R4N2       | as PAN  |       |     |                                 |
| CH2O       | 6.0e+3  |       | 1.0 | Karl et al., 2010               |
| GLYX       | 360000  | -7200 | 1.0 | Schweitzer et al., 1998         |
| MGLY       | 3700    | -7500 | 1.0 | Ito et al., 2007                |
| GLYC       | 41000   | -4600 | 1.0 | Ito et al., 2007                |
| MPAN       | as PAN  |       |     |                                 |
| N2O5       | as HNO3 |       |     |                                 |
| HCOOH      | 1.67d+5 | -6100 | 1.0 | Ito et al., 2007                |
| ACTA       | 1.14d+4 | -6300 | 1.0 | Ito et al., 2007                |
| ISOPND     | 1.7d+4  | -9200 | 1.0 | Ito et al., 2007                |
| ISOPNB     | 1.7d+4  | -9200 | 1.0 | Ito et al., 2007                |
| MVKN+MACRN | 1.7d+4  | -9200 | 1.0 | Ito et al., 2007                |
| PROPNN     | 1.0d+3  |       | 1.0 | NITROOXYACETONE IN SANDER TABLE |
| RIP        | 1.7e6   |       | 1.0 | Marais et al., 2012             |
| IEPOX      | 1.3e8   |       | 1.0 | Marais et al., 2012             |
| MAP        | 8.4d+2  | -5300 | 1.0 | R. Sander                       |
| MVK        | 4.4d1   |       | 1.0 | from R.Sander                   |
| MACR       | 6.5d0   |       | 1.0 | from R.Sander                   |
| MOBA       | 23000   | -6300 | 1.0 | Ito et al., 2007                |
| HAC        | 2.9e3   |       | 1.0 | Ito et al., 2007                |
| ALD2       | 1.5e1   |       | 1.0 | R. Sander                       |
| SO2        | 1.0d+5  |       | 0.0 |                                 |

Karl, T., Harley, P., Emmons, L., Thornton, B., Guenther, A., Basu, C., Turnipseed, A., and Jardine, K.: Efficient Atmospheric Cleansing of Oxidized Organic Trace Gases by Vegetation, Science, 330, 816-819, 10.1126/science.1192534, 2010.

## Reactions

The following tables list information about new reactions in the Paulot isoprene chemistry mechanism:

### New reactions

| No | Reaction                                                                                | Rate Constant                             | Reference          | Note                                                                   |
|----|-----------------------------------------------------------------------------------------|-------------------------------------------|--------------------|------------------------------------------------------------------------|
|    | <b>Reactions with OH</b>                                                                |                                           |                    |                                                                        |
|    | ISOP + OH = RIO2                                                                        | 3.1E-11exp(350/T)                         | Sander et al. 2012 | from JPL                                                               |
|    | MACR + OH = 0.53MAO3 +0.47MRO2                                                          | 8.0E-12exp(380/T)                         | Paulot 2009a       | MAO3(=MCO3 in the paper);<br>MRO2(=MACROO in the paper)                |
|    | MVK+OH = VRO2                                                                           | 2.6E-12exp(610/T)                         |                    |                                                                        |
|    | PMN + OH = HAC + CO + NO2                                                               | 2.90E-11                                  | MCM v3.2           | rates and products all from MCM, originally from Orlando et al. (2002) |
|    | GLYC + OH = 0.732CH2O +0.361CO2 + 0.505CO + 0.227OH + 0.773HO2 + 0.134GLYX + 0.134HCOOH | FRAC=1-11.0729*exp(-1/73T)<br>Rate=8.00E- | Paulot 2009a       | Butkovskaya 2006 companion paper and Paulot 2009                       |

|  |                                                            |                                                            |                |                                                                                                     |
|--|------------------------------------------------------------|------------------------------------------------------------|----------------|-----------------------------------------------------------------------------------------------------|
|  |                                                            | 12*FRAC                                                    |                |                                                                                                     |
|  | GLYC + OH = HCOOH + OH + CO                                | FRAC=1-11.0729*exp(-1/73T)<br>Rate=8.00E-12*(1-FRAC)       | Paulot 2009a   | Butkovskaya 2006 companion paper and Paulot 2009                                                    |
|  | GLYX+ OH = HO2+2CO                                         | 3.1E-12exp(340/T)                                          | IUPAC2008      | JMAO                                                                                                |
|  | HAC + OH = MGLY +HO2                                       | FRAC=1-23.7*exp(1/60T)<br>Rate=2.15E-12exp(305/T)*FRAC     | Paulot 2009a   | Butkovskaya JPC A (a,b)2006 and Paulot 2009a                                                        |
|  | HAC + OH = 0.5HCOOH + OH +0.5ACTA +0.5CO2 + 0.5CO + 0.5MO2 | FRAC=1-23.7*exp(1/60T)<br>Rate=2.15E-12exp(305/T)*(1-FRAC) | Paulot 2009a   | Butkovskaya JPC A (a,b)2006 and Paulot 2009a                                                        |
|  | PRPN + OH =0.209PRN1+0.791OH+0.791PROPNN                   | 8.78E-12exp(200/T)                                         |                | Branching ratio is determined by alpha and beta Hydrogen position (Kwok et al., 1995).              |
|  | ETP + OH =0.64OH+0.36ETO2+0.60ALD2                         | 5.18E-12exp(200/T)                                         |                | Branching ratio is determined by alpha and beta Hydrogen position (Kwok et al., 1995).              |
|  | RA3P + OH =0.64OH+0.36A3O2+0.64RCHO                        | 5.18E-12exp(200/T)                                         |                | Branching ratio is determined by alpha and beta Hydrogen position (Kwok et al., 1995).              |
|  | RB3P + OH =0.791OH+0.209B3O2+0.791ACET                     | 8.78E-12exp(200/T)                                         |                | Branching ratio is determined by alpha and beta Hydrogen position (Kwok et al., 1995).              |
|  | R4P + OH =0.791OH+0.209R4O2+0.791RCHO                      | 8.78E-12exp(200/T)                                         |                | Branching ratio is determined by alpha and beta Hydrogen position (Kwok et al., 1995).              |
|  | RP + OH = RCO3                                             | 6.13E-13exp(200/T)                                         | same as MAP+OH |                                                                                                     |
|  | PP + OH =0.791OH+0.209PO2+0.791HAC                         | 8.78E-12exp(200/T)                                         |                | Branching ratio is determined by alpha and beta Hydrogen position (Kwok et al., 1995).              |
|  | RIP + OH = 0.387RIO2 + 0.613OH + 0.613HC5                  | 4.75E-12exp(200/T)                                         | Paulot 2009b   | branching ratio is derived below                                                                    |
|  | RIP + OH = OH + IEPOX                                      | 1.9E-11exp(390/T)                                          | Paulot 2009b   | the yield of IEPOX is > 70% assumed to be 100%                                                      |
|  | IEPOX + OH = IEPOXOO                                       | 5.78e-11exp(-400/T)                                        | Paulot 2009b   |                                                                                                     |
|  | IAP + OH = 0.654OH + 0.654DHMOB + 0.346HC5OO               | 5.31E-12 exp(200/T)                                        |                |                                                                                                     |
|  | VRP + OH =0.791OH+0.791MEK+0.209VRO2                       | 8.78E-12exp(200/T)                                         |                |                                                                                                     |
|  | MRP + OH = MRO2                                            | 1.84E-12exp(200/T)                                         |                | This channel is for the abstraction of peroxide H (OOH), which is slow and ignored in MCM v3.2      |
|  | MRP + OH = CO2 + HAC + OH                                  | 4.40E-12exp(380/T)                                         |                | This second channel is for the abstraction of aldehydic H, much faster! The rate is from MACR + OH. |
|  | MAOP + OH = MAO3                                           | 6.13E-13exp(200/T)                                         |                | same as MAP+OH                                                                                      |
|  | MAOP + OH = MAOPO2                                         | 3.60E-12exp(380/T)                                         |                |                                                                                                     |
|  | OH + MAP = 1.0MCO3                                         | 6.13E-13exp(200/T)                                         |                | From J. Orlando (unpublished results), how confident is this temperature dependence?                |

|                                                                                                                        |                                                                                     |                                  |                                                                                                                                                     |
|------------------------------------------------------------------------------------------------------------------------|-------------------------------------------------------------------------------------|----------------------------------|-----------------------------------------------------------------------------------------------------------------------------------------------------|
| HC5 + OH =HC5OO                                                                                                        | 3.35E-11exp(380/T)                                                                  | Paulot 2009a                     |                                                                                                                                                     |
| ISOPND + OH =ISOPNDO2                                                                                                  | 2.64E-11exp(380/T)                                                                  | Paulot 2009a                     |                                                                                                                                                     |
| ISOPNB + OH =ISOPNBO2                                                                                                  | 3.61E-12exp(380/T)                                                                  | Paulot 2009a                     |                                                                                                                                                     |
| ISNP + OH<br>=0.612OH+0.612R4N1++0.193ISOPNBO2+0.193ISOPNDO2                                                           | 4.75E-12exp(200/T)                                                                  |                                  | replace the old ISNP+OH                                                                                                                             |
| MVKN + OH =<br>0.650HCOOH+NO3+0.650MGLY+0.350CH2O+0.350PYAC                                                            | 1.5E-12exp(380/T)                                                                   | Paulot 2009a                     |                                                                                                                                                     |
| MACRN + OH = 1.0MACRNO2                                                                                                | 1.39E-11exp(380/T)                                                                  |                                  |                                                                                                                                                     |
| DHMOB + OH = 1.5CO + 1.0HO2 + 0.5HAC + 0.5MEK                                                                          | 2.52E-11exp(410/T)                                                                  |                                  |                                                                                                                                                     |
| MOBA + OH =MOBAOO                                                                                                      | 2.79E-11exp(380/T)                                                                  |                                  |                                                                                                                                                     |
| ETHLN + OH =CH2O +CO2+NO2                                                                                              | 1.00E-11                                                                            |                                  |                                                                                                                                                     |
| PROPNN+ OH =NO2+MGLY                                                                                                   | 1.00E-15                                                                            | Paulot 2009a                     | IUPAC says < 1e-12;Experiment suggests it is slower than than 1e-13-1e-15                                                                           |
| ATOOH + OH = ATO2 + H2O                                                                                                | 2.66E-12exp(200/T)                                                                  | Vaghjani and Ravishankara (1989) | Abstraction of peroxide H, follow MP + OH                                                                                                           |
| ATOOH + OH = MGLY + OH +H2O                                                                                            | 1.14E-12exp(200/T)                                                                  | Vaghjani and Ravishankara (1989) | Abstraction of alpha H, follow MP + OH                                                                                                              |
| R4N2+OH = R4N1+H2O                                                                                                     | 1.6E-12                                                                             | IUPAC06                          | JMAO: use the one from HO + 1-C4H9ONO2 → products                                                                                                   |
| <b>RO2 + NO reactions</b>                                                                                              |                                                                                     |                                  |                                                                                                                                                     |
| RIO2 + NO = 0.883NO2 + 0.783HO2 + 0.660CH2O + 0.400MVK + 0.260MACR + 0.070ISOPND + 0.047ISOPNB + 0.123HC5 + 0.1DIBOO   | 2.7E-12 exp(350/T)                                                                  | Paulot 2009a                     | HNO3 channel deleted since nitrate is treated explicitly;paulothn2009;neglect methylfuran formation (increase the yield of other products)          |
| VRO2 + NO = 0.88NO2 + 0.35HO2 + 0.35CH2O + 0.53MCO3 + 0.53GLYC + 0.35MGLY + 0.12MVKN                                   | 2.7E-12 exp(350/T)                                                                  | Paulot 2009a                     |                                                                                                                                                     |
| MRO2 + NO = 0.85NO2 + 0.85HO2 + 0.122MGLY + 0.728HAC + 0.728CO + 0.122CH2O + 0.15MACRN                                 | 2.7E-12 exp(350/T)                                                                  | Paulot 2009a                     | This is modified based on Chuong et al. (2004).It was equally yield for MGLY and HAC in Paulot 2009 ACP, according to Peeters decomposition scheme. |
| MAN2 + NO = 1.5NO2 + 0.5CH2O + 0.5MGLY + 0.5PROPNN + 0.5CO + 0.5OH                                                     | 2.7E-12 exp(350/T)                                                                  |                                  | Tyndall ETO2+NO                                                                                                                                     |
| IEPOXOO + NO = 0.725HAC+0.275GLYC+0.275GLYX +0.275MGLY +0.125OH +0.825HO2+0.200CO2+0.375CH2O +0.074HCOOH +0.251CO +NO2 | 2.7E-12exp(350/T)                                                                   |                                  | FP: No peroxide was observed                                                                                                                        |
| MAOPO2 + NO = 1.0HAC+1.0CO2+1.0OH+1.0NO2                                                                               | K* (1-YN) where YN is returned from fyarno3.f K=2.7E-12 exp(350/T) (Xcarbn=4.00E00) |                                  |                                                                                                                                                     |
| MAOPO2 + NO = 1.0HNO3                                                                                                  | K* YN where YN is returned from fyarno3.f K=2.7E-12 exp(350/T) (Xcarbn=4.00E00)     |                                  | Not treated explicitly                                                                                                                              |
| HC5OO + NO = NO2 + 0.216GLYX + 0.234MGLY +                                                                             | K* (1-YN) where YN is returned from                                                 |                                  |                                                                                                                                                     |



|  |                                                                                                                                                                                                                |                                                                                          |              |                                                                         |
|--|----------------------------------------------------------------------------------------------------------------------------------------------------------------------------------------------------------------|------------------------------------------------------------------------------------------|--------------|-------------------------------------------------------------------------|
|  | 0.234GLYC + 0.216HAC + 0.290DHMOB + 0.170MOBA + 0.090RCHO + HO <sub>2</sub> + 0.090CO                                                                                                                          | fyrno3.f K=2.7E-12 exp(350/T)<br>(Xcarbn=4.00E00)                                        |              |                                                                         |
|  | HC5OO + NO=HNO <sub>3</sub>                                                                                                                                                                                    | K* YN where YN is returned from<br>fyrno3.f K=2.7E-12 exp(350/T)<br>(Xcarbn=5.00E00)     |              |                                                                         |
|  | ISOPNDO <sub>2</sub> + NO = 0.070MACRN + 0.310HCOOH + 0.440HAC + 0.130ETHLN + 0.650CH <sub>2</sub> O + 1.340NO <sub>2</sub> + 0.150GLYC + 0.310NO <sub>3</sub> + 0.150PROPNN + 0.340MEK + 0.350HO <sub>2</sub> | K* (1-YN) where YN is returned from<br>fyrno3.f K=2.7E-12 exp(350/T)<br>(Xcarbn=4.00E00) | Paulot 2009a |                                                                         |
|  | ISOPNDO <sub>2</sub> +NO=HNO <sub>3</sub>                                                                                                                                                                      | K* YN where YN is returned from<br>fyrno3.f K=2.7E-12 exp(350/T)<br>(Xcarbn=5.00E00)     |              | Nitrates from ISOPND could not be observed in this experiment           |
|  | ISOPNBO <sub>2</sub> + NO = 0.6GLYC + 0.6HAC + 0.4CH <sub>2</sub> O + 1.6NO <sub>2</sub> + 0.26MACRN + 0.4HO <sub>2</sub> + 0.14MVKN                                                                           | K* (1-YN) where YN is returned from<br>fyrno3.f K=2.7E-12 exp(350/T)<br>(Xcarbn=4.00E00) | Paulot 2009a |                                                                         |
|  | ISOPNBO <sub>2</sub> + NO = HNO <sub>3</sub>                                                                                                                                                                   | K* YN where YN is returned from<br>fyrno3.f K=2.7E-12 exp(350/T)<br>(Xcarbn=5.00E00)     |              | Nitrates from ISOPND could not be observed in this experiment           |
|  | MACRNO <sub>2</sub> + NO = 0.08ACTA + 0.08CH <sub>2</sub> O + 0.15NO <sub>3</sub> + 0.07HCOOH + 0.070MGLY + 0.850HAC + 0.85NO <sub>2</sub> + 0.93CO <sub>2</sub> + 1.0NO <sub>2</sub>                          | 2.7E-12exp(350/T)                                                                        |              | no nitrate yield (acyl)                                                 |
|  | DIBOO + NO =HO <sub>2</sub> +NO <sub>2</sub> +0.520GLYC +0.520MGLY +0.480HAC+0.480GLYX                                                                                                                         | K* (1-YN) where YN is returned from<br>fyrno3.f K=2.7E-12 exp(350/T)<br>(Xcarbn=4.00E00) |              | Dibble, 2004 Note that the yield of DIBOO Is likely overestimate (~30%) |
|  | DIBOO + NO =HNO <sub>3</sub>                                                                                                                                                                                   | K* YN where YN is returned from<br>fyrno3.f K=2.7E-12 exp(350/T)<br>(Xcarbn=5.00E00)     |              |                                                                         |
|  | MOBAOO + NO =RCHO+CO <sub>2</sub> +HO <sub>2</sub> +NO <sub>2</sub>                                                                                                                                            | K* (1-YN) where YN is returned from<br>fyrno3.f K=2.7E-12 exp(350/T)<br>(Xcarbn=4.00E00) |              |                                                                         |
|  | MOBAOO + NO =HNO <sub>3</sub>                                                                                                                                                                                  | K* YN where YN is returned from<br>fyrno3.f K=2.7E-12 exp(350/T)<br>(Xcarbn=5.00E00)     |              |                                                                         |
|  | MAN <sub>2</sub> + NO = 1.5NO <sub>2</sub> + 0.5CH <sub>2</sub> O + 0.5MGLY + 0.5PROPNN + 0.5CO + 0.5OH                                                                                                        | 2.7E-12 exp(350/T)                                                                       |              |                                                                         |
|  | MCO <sub>3</sub> +NO = MO <sub>2</sub> + NO <sub>2</sub> + CO <sub>2</sub>                                                                                                                                     | 8.10E-12 exp(270/T)                                                                      | JPL06        |                                                                         |
|  | RCO <sub>3</sub> +NO = NO <sub>2</sub> +ETO <sub>2</sub>                                                                                                                                                       | 6.70E-12 exp(340/T)                                                                      | IUPAC06      | Products follow C <sub>2</sub> H <sub>5</sub> CO <sub>3</sub> +NO       |
|  | MAO <sub>3</sub> + NO = NO <sub>2</sub> + 0.5CH <sub>2</sub> O + 0.5CO + CO <sub>2</sub> + 0.5MO <sub>2</sub> + 0.5MCO <sub>3</sub>                                                                            | 6.70E-12 exp(340/T)                                                                      |              |                                                                         |
|  | ATO <sub>2</sub> +NO = 0.96NO <sub>2</sub> + 0.960CH <sub>2</sub> O +0.960MCO <sub>3</sub> +                                                                                                                   |                                                                                          |              |                                                                         |

|  |                                                                                                                                                                     |                                            |                      |                                                                                                                                                  |
|--|---------------------------------------------------------------------------------------------------------------------------------------------------------------------|--------------------------------------------|----------------------|--------------------------------------------------------------------------------------------------------------------------------------------------|
|  | 0.04R4N2                                                                                                                                                            | 2.80E-12 exp(300/T)                        |                      |                                                                                                                                                  |
|  | <b>RO2 + HO2 reactions</b>                                                                                                                                          |                                            |                      |                                                                                                                                                  |
|  | RIO2 + HO2 = 0.88RIP + 0.12OH + 0.047MACR + 0.073MVK + 0.12HO2 + 0.12CH2O                                                                                           | 2.91E-13*EXP(1300/T)[1-EXP(-0.245*n)], n=5 | Paulot 2009b         | Rate is from Saunders et al. (2003)                                                                                                              |
|  | VRO2 + HO2 = 0.1VRP + 0.68OH + 0.578GLYC + 0.578MCO3 + 0.187MEK + 0.102HO2 + 0.102CH2O + 0.102MGLY + 0.033RCHO                                                      | 2.91E-13*EXP(1300/T)[1-EXP(-0.245*n)], n=4 | ???                  | crounse2010                                                                                                                                      |
|  | MRO2 + HO2 = 1.0MRP                                                                                                                                                 | 2.91E-13*EXP(1300/T)[1-EXP(-0.245*n)], n=4 |                      | isomerization of MRO2 is included in another reaction.                                                                                           |
|  | MAN2 + HO2 = 0.075PROPNN + 0.075CO + 0.075HO2 + 0.075MGLY + 0.075CH2O + 0.075NO2 + 0.15OH + 0.85ISNP                                                                | 2.91E-13*EXP(1300/T)[1-EXP(-0.245*n)], n=4 |                      | assume 15% recycling of OH, the rest goes to ISNP                                                                                                |
|  | IEPOXOO + HO2 = 0.725HAC + 0.275GLYC + 0.275GLYX + 0.275MGLY + 1.125OH + 0.825HO2 + 0.200CO2 + 0.375CH2O + 0.074HCOOH + 0.251CO                                     | 2.91E-13*EXP(1300/T)[1-EXP(-0.245*n)], n=5 | Paulot 2009b         |                                                                                                                                                  |
|  | DIBOO + HO2 = 0.15HO2 + 0.15OH + 0.078GLYC + 0.078MGLY + 0.072HAC + 0.072GLYX + 0.85R4P                                                                             | 2.91E-13*EXP(1300/T)[1-EXP(-0.245*n)], n=5 |                      | assume 15% recycling of OH, rest goes to R4P                                                                                                     |
|  | MAOPO2 + HO2 = 1.0HAC+1.0CO2+2.0OH                                                                                                                                  | 2.91E-13*EXP(1300/T)[1-EXP(-0.245*n)], n=4 |                      |                                                                                                                                                  |
|  | HC5OO + HO2 = 0.1IAP + 0.9OH + 0.9MGLY + 0.9GLYC + 0.9HO2                                                                                                           | 2.91E-13*EXP(1300/T)[1-EXP(-0.245*n)], n=5 |                      | 90% recycling, no experimental data. Somewhat based upon the high recycling rate observed for MVK/MACR                                           |
|  | ISOPNDO2 + HO2 = 0.035MACRN + 0.155HCOOH + 0.22HAC + 0.065ETHLN + 0.325CH2O + 0.170NO2 + 0.075GLYC + 0.155NO3 + 0.075PROPNN + 0.170MEK + 0.175HO2 + 0.5OH + 0.5ISNP | 2.91E-13*EXP(1300/T)[1-EXP(-0.245*n)], n=5 |                      | Assume 50% recycling from HO2+RO2 (no experimental data - check Ng et al. for better estimates)                                                  |
|  | ISOPNBO2 + HO2 = 0.3GLYC + 0.3HAC + 0.2CH2O + 0.13MACRN + 0.07MVKN + 0.3NO2 + 0.2HO2 + 0.5OH + 0.5ISNP                                                              | 2.91E-13*EXP(1300/T)[1-EXP(-0.245*n)], n=5 |                      | Assume 50% recycling from HO2+RO2 (no experimental data - check Ng et al. for better estimates)                                                  |
|  | MACRNO2 + HO2 = 0.08ACTA + 0.08CH2O + 0.15NO3 + 0.07HCOOH + 0.07MGLY + 0.85HAC + 0.85NO2 + 0.93CO2 + 1.0OH                                                          | 2.91E-13*EXP(1300/T)[1-EXP(-0.245*n)], n=4 |                      | Assume 100% recycling. No experiment data. Inferred from the very high recycling observed for MAO2+HO2                                           |
|  | MOBAOO + HO2 = 0.15OH + 0.15HO2 + 0.15RCHO + 0.15CO2 + 0.85R4P                                                                                                      | 2.91E-13*EXP(1300/T)[1-EXP(-0.245*n)], n=5 | Paulot 2009a         | assume 15% recycling of OH, rest goes to R4P                                                                                                     |
|  | MCO3 + HO2 = 0.15 ACTA + 0.15 O3 + 0.44 OH + 0.44 MO2 + 0.41 MAP                                                                                                    | 5.2e-13exp(980/T)                          | IUPAC(Feb2009)       |                                                                                                                                                  |
|  | RCO3 + HO2 = 0.410RP + 0.150RCOOH + 0.150O3 + 0.440OH + 0.440ETO2                                                                                                   | 4.3E-13exp(1040/T)                         | MCM v3.2             | Branching ratio is from MCMv3.2                                                                                                                  |
|  | ATO2 + HO2 = 0.15MCO3 + 0.15OH + 0.15CH2O + 0.85ATOOH                                                                                                               | 8.60E-13 exp(700/T)                        | Dillon et al. (2008) | Tyndall, Dillon et al. (ACP 2008) cycling 15%, reduce the recycling by 5% compared to previous version to be fully consistent with Dillon et al. |
|  | KO2 + HO2 = 0.15OH + 0.15ALD2 + 0.15 MCO3 + 0.85ATOOH                                                                                                               | 2.91E-13*EXP(1300/T)[1-EXP(-0.245*n)], n=4 | MCM                  | assuming 15% recycling of OH                                                                                                                     |
|  | MAO3 + HO2 = 0.44OH + 0.15O3 + 0.59CH2O + 0.39MO2 +                                                                                                                 | 4.3E-13exp(1040/T)                         |                      | use MCM, 44% OH channel, 15% O3 channel, 41% peroxide                                                                                            |

|  |                                                                                                                           |                     |         |                                                                                              |
|--|---------------------------------------------------------------------------------------------------------------------------|---------------------|---------|----------------------------------------------------------------------------------------------|
|  | 0.41MAOP + 0.39CO                                                                                                         |                     |         | channel.                                                                                     |
|  | <b>RO2 + MO2/RO2 reactions</b>                                                                                            |                     |         |                                                                                              |
|  | RIO2 + MO2 = 1.1HO2 + 1.22CH2O + 0.280MVK + 0.180MACR + 0.3HC5 + 0.24MOH + 0.24ROH                                        | 8.37E-14            |         |                                                                                              |
|  | HC5OO + MO2 = 0.50HO2 + 0.33CO + 0.09H2 + 0.18HAC + 0.13GLYC + 0.29MGLY + 0.25MEK + 0.95CH2O + 0.25MOH + 0.25ROH + 0.5HO2 | 8.37E-14            |         | Tyndall MO2+MO2<br>Atkinson97 RO2+RO2;<br>HC5OO=old IAO2                                     |
|  | MRO2 + MO2 = 0.595HAC + 0.255MGLY + 0.595CO + 1.255CH2O + 1.7HO2 + 0.150ROH                                               | 8.37E-14            |         |                                                                                              |
|  | VRO2 + MO2 = 0.14HO2 + 0.14CH2O + 0.36MCO3 + 0.36GLYC + 0.14MGLY + 0.25MEK + 0.75CH2O + 0.25MOH + 0.25ROH + 0.5HO2        | 8.37E-14            |         |                                                                                              |
|  | MAN2 + MO2 = 0.375PROPNN + 0.375CO + 0.375HO2 + 0.375MGLY + 0.375CH2O + 0.375NO2 + 0.250CH2O + 0.250R4N2                  | 8.37E-14            |         |                                                                                              |
|  | MAOPO2 + MO2 = 0.7HAC + 0.7CO2 + 0.7OH + 1.0CH2O + 0.7HO2 + 0.3ROH                                                        | 8.37E-14            |         |                                                                                              |
|  | RIO2 + RIO2 = 1.28HO2 + 0.92CH2O + 0.56MVK + 0.36MACR + 0.48ROH + 0.5HC5                                                  | 1.54E-13            |         |                                                                                              |
|  | MAOPO2 + MAOPO2 = 2.0HAC + 2.0CO2 + 2.0OH                                                                                 | 8.37E-14            |         |                                                                                              |
|  | MCO3 + MO2 = CH2O + MO2 + HO2                                                                                             | 1.80E-12 exp(500/T) |         |                                                                                              |
|  | MCO3 + MO2 = ACTA + CH2O                                                                                                  | 2.00E-13 exp(500/T) |         |                                                                                              |
|  | RCO3 + MO2 = CH2O + HO2 + ETO2                                                                                            | 1.68E-12 exp(500/T) |         |                                                                                              |
|  | RCO3 + MO2 = RCOOH + CH2O                                                                                                 | 1.87E-13 exp(500/T) |         |                                                                                              |
|  | MAO3 + MO2 = CH2O + HO2 + CH2O + MCO3                                                                                     | 1.68E-12 exp(500/T) |         |                                                                                              |
|  | MAO3 + MO2 = RCOOH + CH2O                                                                                                 | 1.87E-13 exp(500/T) |         |                                                                                              |
|  | <b>RO2 + MCO3 reactions</b>                                                                                               |                     |         |                                                                                              |
|  | MAOPO2 + MCO3 = 1.0HAC + 2.0CO2 + OH + MO2                                                                                | 1.68E-12 exp(500/T) |         |                                                                                              |
|  | MAOPO2 + MCO3 = 1.0ACTA + 1.0MEK                                                                                          | 1.87E-13 exp(500/T) |         |                                                                                              |
|  | R4O2 + MCO3 = MO2 + 0.32ACET + 0.19MEK + 0.27HO2 + 0.32ALD2 + 0.13RCHO + 0.05A3O2 + 0.18B3O2 + 0.32ETO2                   | 1.68E-12 exp(500/T) |         |                                                                                              |
|  | R4O2 + MCO3 = 1.0ACTA + 1.0MEK                                                                                            | 1.87E-13 exp(500/T) |         |                                                                                              |
|  | ATO2 + MCO3 = MCO3 + CH2O + MO2                                                                                           | 1.68E-12 exp(500/T) | IUPAC06 |                                                                                              |
|  | ATO2 + MCO3 = MGLY + ACTA                                                                                                 | 1.87E-13 exp(500/T) | IUPAC06 | replace MEK with MGLY                                                                        |
|  | HC5OO + MCO3 = 0.216GLYX + 0.234MGLY + 0.234GLYC + 0.216HAC + 0.29DHMOB + 0.17MOBA + 0.09RCHO + HO2 + 0.09CO + MO2        | 1.68E-12 exp(500/T) |         | HC5OO=old IAO2, this radical channel use the same as HC5OO+NO without NO2 yield.             |
|  | HC5OO + MCO3 = MEK + ACTA                                                                                                 | 1.87E-13 exp(500/T) |         |                                                                                              |
|  | VRO2 + MCO3 = 0.4HO2 + 0.4CH2O + 0.6MCO3 + 0.6GLYC + 0.4MGLY + 1.0MO2                                                     | 1.68E-12 exp(500/T) |         | this radical channel use the same as VRO2+NO without NO2 and MVKN yield. And carbon balance. |
|  | VRO2 + MCO3 = MEK + ACTA                                                                                                  | 1.87E-13 exp(500/T) |         |                                                                                              |
|  | MRO2 + MCO3 = 0.850HO2 + 0.143MGLY + 0.857HAC + 0.857CO + 0.143CH2O + 1.0MO2                                              | 1.68E-12 exp(500/T) |         | this radical channel use the same as MRO2+NO without NO2 and MACRN yield.                    |
|  | MRO2 + MCO3 = MEK + ACTA                                                                                                  | 1.87E-13 exp(500/T) |         |                                                                                              |

|  |                                                                                                                                         |                                                               |                           |                                                                                                                                               |
|--|-----------------------------------------------------------------------------------------------------------------------------------------|---------------------------------------------------------------|---------------------------|-----------------------------------------------------------------------------------------------------------------------------------------------|
|  | MAN2 + MCO3 = 0.5PROPNN + 0.5CO + 0.5HO2 + 0.5MGly + 0.5CH2O + 0.5NO2 + CO2 + MO2                                                       | 1.68E-12 exp(500/T)                                           |                           |                                                                                                                                               |
|  | MAN2 + MCO3 = RCHO + ACTA + NO2                                                                                                         | 1.87E-13 exp(500/T)                                           |                           |                                                                                                                                               |
|  | RIO2 + MCO3 = 0.887HO2 + 0.747CH2O + 0.453MVK + 0.294MACR + 0.140HC5 + 0.113DIBOO + CO2 + MO2                                           | 1.68E-12 exp(500/T)                                           |                           | Follow RIO2+NO without the yield of nitrate and NO2 and then rescale it.                                                                      |
|  | RIO2 + MCO3 = MEK + ACTA                                                                                                                | 1.87E-13 exp(500/T)                                           |                           |                                                                                                                                               |
|  | MCO3 + MCO3 = 2MO2                                                                                                                      | 2.50E-12 exp(500/T)                                           | Tyndall2001               |                                                                                                                                               |
|  | RCO3 + MCO3 = MO2 + ETO2                                                                                                                | 2.50E-12 exp(500/T)                                           | Tyndall2001               |                                                                                                                                               |
|  | MAO3 + MCO3 = MO2 + MCO3 + CH2O                                                                                                         | 2.50E-12 exp(500/T)                                           | Tyndall2001               |                                                                                                                                               |
|  | <b>RO2 + NO2 equilibrium</b>                                                                                                            |                                                               |                           |                                                                                                                                               |
|  | MCO3+NO2+M = PAN                                                                                                                        | LPL: 9.70E-29(300/T)^5.6;<br>HPL:9.3E-12(300/T)^1.5; Fc: 0.6  | JPL06                     |                                                                                                                                               |
|  | PAN = MCO3+NO2                                                                                                                          | 9.30E-29 exp(14000/T)                                         | IUPAC06                   | equilibrium with the one above                                                                                                                |
|  | RCO3+NO2 = PPN                                                                                                                          | LPL: 9.00E-28(300/T)^8.9;<br>HPL:7.70E-12(300/T)^0.2; Fc: 0.6 | JPL06                     |                                                                                                                                               |
|  | PPN = RCO3+NO2                                                                                                                          | 9e-29*exp(14000/T)                                            | JPL06                     |                                                                                                                                               |
|  | MAO3+NO2 = PMN                                                                                                                          | LPL: 9.00E-28(300/T)^8.9;<br>HPL:7.70E-12(300/T)^0.2; Fc: 0.6 | JPL06                     |                                                                                                                                               |
|  | PMN = MAO3+NO2                                                                                                                          | 9e-29*exp(14000/T)                                            | JPL06                     |                                                                                                                                               |
|  | MACRNO2+NO2= PMNN                                                                                                                       | LPL: 9.00E-28(300/T)^8.9<br>HPL:7.70E-12(300/T)^0.2 Fc: 0.6   |                           |                                                                                                                                               |
|  | PMNN =MACRNO2 + NO2                                                                                                                     | 9e-29*exp(14000/T)                                            |                           |                                                                                                                                               |
|  | <b>Reactions with O3</b>                                                                                                                |                                                               |                           |                                                                                                                                               |
|  | ISOP + O3 = 0.244MVK + 0.325MACR + 0.845CH2O + 0.110H2O2 + 0.522CO + 0.204HCOOH + 0.199MCO3 + 0.026HO2 + 0.270OH + 0.128PRPE + 0.051MO2 | 1.00E-14 *EXP(-1970/T)                                        | MCM v3.2                  | rate is from JPL 11, products from MCM, assuming CH2OO is dominated by reactions with H2O. ISOP + O3 in standard chem is not carbon-balanced. |
|  | MVK + O3 = 0.202OH + 0.202HO2 + 0.352HCOOH + 0.535CO + 0.050ALD2 + 0.950MGly + 0.050CH2O                                                | 8.5 E-16exp(-1520/T)                                          | MCM?                      | Rate is from IUPAC06                                                                                                                          |
|  | MACR + O3 = 0.261OH + 0.202HO2 + 0.326HCOOH + 0.569CO + 0.880MGly + 0.120CH2O                                                           | 1.4 E-15exp(-2100/T)                                          | MCM?                      |                                                                                                                                               |
|  | HC5 + O3 = 0.6MGly + 0.1OH + 0.12CH2O + 0.28GLYC + 0.3O3 + 0.4CO + 0.2H2 + 0.2HAC + 0.2HCOOH                                            | 6.16E-15 exp(-1814/T)                                         |                           | HC5=old IALD??                                                                                                                                |
|  | ISOPNB + O3 = 0.610MVKN + 0.390MACRN + 0.27OH + CH2O                                                                                    | 1.06E-16                                                      | Lockwood et al., 2010 ACP | use 1,2 for beta channel                                                                                                                      |
|  | ISOPND + O3 = 0.5PROPNN + 0.5ETHLN + 0.27OH + 0.5GLYC + 0.5HAC                                                                          | 5.3E-17                                                       | Lockwood et al., 2010 ACP | use 1,4 for delta channel                                                                                                                     |
|  | MOBA + O3 =OH +HO2+CO2+MEK                                                                                                              | 2.00E-17                                                      | Paulot 2009a              | Weak constraint on the rate constant - no constraint on the                                                                                   |

|  |                                                                                                                                                                       |                                                                |                                |                                                                                                             |
|--|-----------------------------------------------------------------------------------------------------------------------------------------------------------------------|----------------------------------------------------------------|--------------------------------|-------------------------------------------------------------------------------------------------------------|
|  |                                                                                                                                                                       |                                                                |                                | products                                                                                                    |
|  | PMN + O3 = NO2 + 0.6CH2O + HO2                                                                                                                                        | 8.20E-18                                                       | ?                              |                                                                                                             |
|  | <b>Isomerization reactions</b>                                                                                                                                        |                                                                |                                |                                                                                                             |
|  | RIO2 = 2.0HO2 + 1.0CH2O + 0.5MGly + 0.5GLYC + 0.5GLYX + 0.5GLYX + 0.500HAC + 1.0OH                                                                                    | 4.07E+08<br>exp(-7694/T)                                       | Peeters et al.<br>(2009, 2010) | Isomerization rate is adjusted according to Crounse et al. (2010), products follow Stavrakou et al. (2010). |
|  | MRO2 = 1.0CO + 1.0HAC + 1.0OH                                                                                                                                         | 2.90E+07<br>exp(-5297/T)                                       | Crounse et al.<br>(2012)       | 1,4-H-shift isomerization rate dominates over 1,5-H-shift.                                                  |
|  | <b>Nighttime isoprene chemistry</b>                                                                                                                                   |                                                                |                                |                                                                                                             |
|  | ISOP + NO3 = INO2                                                                                                                                                     | 3.3E-12exp(-450/T)                                             | Sander et al.<br>2012          | from JPL                                                                                                    |
|  | MACR + NO3 = MAN2                                                                                                                                                     | 2.30E-15                                                       | IUPAC06                        |                                                                                                             |
|  | MACR + NO3 = MAO3 + HNO3                                                                                                                                              | 1.10E-15                                                       | IUPAC06                        | IUPAC06 total rate is 3.4E-15, so use the ratio from Lurmann et al., 1986                                   |
|  | INO2 + NO = 0.70ISN1 + 0.035MVK + 0.035MACR + 0.07*CH2O + 0.80HO2 + 1.3NO2 + 0.23HC5                                                                                  | 2.7E-12 exp(350/T)                                             | Rollins et al.<br>(2009)       | ISN1 is the NIT1 in Rollins et al. (2009)                                                                   |
|  | INO2 + NO3 = 0.70ISN1 + 0.035MVK + 0.035MACR + 0.07CH2O + 0.80HO2 + 1.3NO2 + 0.23*HC5                                                                                 | 2.3E-12                                                        |                                |                                                                                                             |
|  | INO2 + HO2 = INPN                                                                                                                                                     | 2.91E-13*EXP(1300/T)[1-EXP(-0.245*n)], n=5                     | Xie et al. (2012)              |                                                                                                             |
|  | INPN + OH = 1.0OH + 1.0NO2 + 1.0MEK                                                                                                                                   | 1.9E-11exp(390/T)                                              |                                |                                                                                                             |
|  | INPN + OH = 0.36INO2 + 0.64R4N2 + 0.64OH                                                                                                                              | 5.18E-12exp(200/T)                                             |                                |                                                                                                             |
|  | INO2 + MO2=0.35*ISN1 + 0.0175*MVK + 0.0175*MACR + 0.15*NO2 + 0.40*HO2 + 0.035*HCHO + 0.115*HC5 + 0.25*ISN1 + 0.25*ISOPND + 0.5*HCHO + 0.5*HO2 + 0.25*HCHO + 0.25*MEOH | 1.30E-12                                                       |                                |                                                                                                             |
|  | INO2 + MCO3 = MO2 + 0.70ISN1 + 0.035MVK + 0.035MACR + 0.07CH2O + 0.80HO2 + 0.3NO2 + 0.23HC5                                                                           | 1.68E-12 exp(500/T)                                            |                                |                                                                                                             |
|  | INO2 + MCO3 = RCHO + ACTA + NO2                                                                                                                                       | 1.87E-13 exp(500/T)                                            |                                |                                                                                                             |
|  | INO2 + INO2 = 0.3NO2 + 0.70ISN1 + 0.035MVK + 0.035MACR + 0.07CH2O + 0.8 HO2 + 0.23HC5 + 0.5ISN1 + 0.5ISOPND                                                           | 1.20E-12                                                       |                                |                                                                                                             |
|  | ISN1 + NO3 = 0.6*ISNOOA + 0.4* ISNOOB + 0.6*HNO3                                                                                                                      | 3.15E-13*exp(-448/T)                                           | Xie et al. (2012)              | ISNOOA and ISNOOB correspond to NIT1NO3OOA and NIT1NO3OOb in Xie et al. (2012)                              |
|  | ISNOOA + NO3 = NO2 + R4N2 + CO +HO2                                                                                                                                   | 4.00E-12                                                       |                                |                                                                                                             |
|  | ISNOOA + NO = NO2 + R4N2 + CO +HO2                                                                                                                                    | 6.70E-12*exp(340/T)                                            |                                |                                                                                                             |
|  | ISNOOA + HO2 = 0.75RP + 0.25RCOOH + 0.25O3                                                                                                                            | 5.20E-13*exp(980/T)                                            |                                |                                                                                                             |
|  | ISNOOA + NO2 = MPAN                                                                                                                                                   | LPL: 9.00E-28(300/T)^8.9;<br>HPL: 7.70E-12(300/T)^0.2; Fc: 0.6 |                                |                                                                                                             |
|  | ISNOOB + NO3=R4N2 + GLYX + NO2 + NO2                                                                                                                                  | 2.30E-12                                                       |                                |                                                                                                             |
|  | ISNOOB + NO = 0.94R4N2 + 0.94GLYX + 0.94 NO2 + 0.94 NO2                                                                                                               | 2.60E-12*exp(380/T)                                            |                                |                                                                                                             |
|  |                                                                                                                                                                       |                                                                |                                |                                                                                                             |

|  |                                                                                         |                       |         |                                                                                                                        |
|--|-----------------------------------------------------------------------------------------|-----------------------|---------|------------------------------------------------------------------------------------------------------------------------|
|  | ISNOOB + HO2 = INPN                                                                     | 2.06E-13*exp(1300/T)  |         |                                                                                                                        |
|  | ISNOOB + MO2 = 0.7R4N2 + 0.7GLYX + 0.7NO2 + 0.25HCHO + 0.25MOH + 0.5HO2 + 0.5HCHO       | 2.0E-13               |         |                                                                                                                        |
|  | ISN1 + O3 = 0.3R4N2 + 0.45CO + 0.15OH + 0.45 HO2 + 0.7 GLYX + 0.7 OH + 0.7NO2 + 0.7MGLY | 4.15E-15*exp(-1520/T) |         |                                                                                                                        |
|  | ISN1 + OH = 0.345ISNOOA + 0.655ISNOHOO                                                  | 7.48E-12*exp(410/T)   |         | ISNOHOO is NIT1OHOO in Xie et al. (2012).                                                                              |
|  | ISNOHOO + NO = 0.934R4N2 + 0.934HO2 + 0.919GLYX                                         | 2.60E-12*exp(380/T)   |         |                                                                                                                        |
|  | ISNOHOO + HO2 = INPN                                                                    | 2.06E-13*exp(1300/T)  |         |                                                                                                                        |
|  | ISNOHOO + MO2 = 0.7R4N2 + 0.7 GLYX + 0.7HO2 + 0.25 HCHO + 0.25MOH + 0.5 CH2O + 0.5 HO2  | 2.0E-13               |         |                                                                                                                        |
|  | <b>Photolysis reactions</b>                                                             |                       |         |                                                                                                                        |
|  | O3 + H2O = 2.OOH                                                                        | JO1D                  | JPL2011 | Assume steady state of O1D. The rate is calculated in calcrate.F with the quenching from N2 and O2 taken into account. |
|  | NO2 = NO + O3                                                                           | JNO2                  |         |                                                                                                                        |
|  | H2O2 = 2OH                                                                              | JH2O2                 |         |                                                                                                                        |
|  | MP = CH2O + HO2 + OH                                                                    | J_ROOH                |         |                                                                                                                        |
|  | CH2O = HO2 + HO2 + CO                                                                   |                       |         |                                                                                                                        |
|  | CH2O = H2 + CO                                                                          |                       |         |                                                                                                                        |
|  | HNO3 = OH + NO                                                                          |                       |         |                                                                                                                        |
|  | HNO4 = OH + NO3                                                                         | J_HO2NO2*0.05         |         | Chemistry_Issues#near-IR_photolysis_of_HNO4                                                                            |
|  | HNO4 = HO2 + NO2                                                                        | J_HO2NO2*0.95         |         | Chemistry_Issues#near-IR_photolysis_of_HNO4                                                                            |
|  | NO3 = NO2 + O3                                                                          |                       |         |                                                                                                                        |
|  | NO3 = NO + O2                                                                           |                       |         |                                                                                                                        |
|  | N2O5 = NO3 + NO2                                                                        |                       |         |                                                                                                                        |
|  | N2O5 = NO3 + NO + O3                                                                    | 0                     |         | turned off                                                                                                             |
|  | ALD2 = MO2 + HO2 + CO                                                                   |                       |         |                                                                                                                        |
|  | ALD2 = CH4 + CO                                                                         |                       |         |                                                                                                                        |
|  | PAN = 0.6MCO3 + 0.6NO2 + 0.4MO2                                                         |                       |         |                                                                                                                        |
|  | RCHO = ETO2 + HO2 + CO                                                                  |                       |         |                                                                                                                        |
|  | ACET = MCO3 + MO2                                                                       |                       |         |                                                                                                                        |
|  | ACET = 2.OMO2 + CO                                                                      |                       |         |                                                                                                                        |
|  | MEK = 0.85MCO3 + 0.85ETO2 + 0.15MO2 + 0.15RCO3                                          |                       |         |                                                                                                                        |
|  | GLYC = CH2O + 2.OHO2 + CO                                                               |                       |         |                                                                                                                        |
|  | GLYX = 0.5H2 + CO + 0.5CH2O + 0.5CO                                                     |                       |         |                                                                                                                        |
|  | GLYX = 2.OCO + 2.OHO2                                                                   |                       |         |                                                                                                                        |
|  | MGLY = MCO3 + CO +HO2                                                                   | J_MGLY                |         |                                                                                                                        |
|  | MGLY = ALD2 + CO                                                                        | 0                     |         | turned off                                                                                                             |
|  | MVK = PRPE + CO                                                                         | J_MVK*0.6             |         |                                                                                                                        |

|                                                                                                                     |            |  |  |
|---------------------------------------------------------------------------------------------------------------------|------------|--|--|
| MVK = MCO3 + CH2O + CO + HO2                                                                                        | J_MVK*0.2  |  |  |
| MVK = MO2 + MAO3                                                                                                    | J_MVK*0.2  |  |  |
| MACR = MAO3 + HO2                                                                                                   | J_MACR*0.5 |  |  |
| MACR = CO + HO2 + CH2O + MCO3                                                                                       | J_MACR*0.5 |  |  |
| HAC = MCO3 + CH2O + HO2                                                                                             |            |  |  |
| INPN = OH + HO2 + RCHO + NO2                                                                                        | J_ROOH     |  |  |
| PRPN = OH + HO2 + RCHO + NO2                                                                                        | J_ROOH     |  |  |
| ETP = OH + HO2 + ALD2                                                                                               | J_ROOH     |  |  |
| RA3P = OH + HO2 + RCHO                                                                                              | J_ROOH     |  |  |
| RB3P = OH + HO2 + ACET                                                                                              | J_ROOH     |  |  |
| R4P = OH + HO2 + RCHO                                                                                               | J_ROOH     |  |  |
| PP = OH + HO2 + ALD2 + CH2O                                                                                         | J_ROOH     |  |  |
| RP = OH + HO2 + ALD2                                                                                                | J_ROOH     |  |  |
| RIP = OH + HO2 + 0.710CH2O + 0.425MVK + 0.285MACR + 0.29HC5                                                         | J_ROOH     |  |  |
| IAP = OH + HO2 + 0.67CO + 0.190H2 + 0.36HAC + 0.26GLYC + 0.580MGLY                                                  | J_ROOH     |  |  |
| ISNP = OH + HO2 + RCHO + NO2                                                                                        | J_ROOH     |  |  |
| VRP = OH + 0.3HO2 + 0.3CH2O + 0.7MCO3 + 0.7GLYC + 0.3MGLY                                                           | J_ROOH     |  |  |
| MRP = OH + HO2 + HAC + CO + CH2O                                                                                    | J_ROOH     |  |  |
| MAOP = OH + CH2O + MCO3                                                                                             | J_ROOH     |  |  |
| R4N2 = NO2 + 0.320ACET + 0.190MEK + 0.180MO2 + 0.270HO2 + 0.320ALD2 + 0.130RCHO + 0.050A3O2 + 0.180B3O2 + 0.320ETO2 | J_MeNO3    |  |  |
| MAP = OH + MO2                                                                                                      | J_ROOH     |  |  |
| MACRN = NO2 + HAC + MGLY + 0.5CH2O + HO2 + 0.5CO                                                                    | J_ONIT1    |  |  |
| MVKN = GLYC + NO2 + MCO3                                                                                            | J_ONIT1    |  |  |
| ISOPNB = HC5 + NO2 + HO2                                                                                            | J_ONIT1    |  |  |
| ISOPND = HC5 + NO2 + HO2                                                                                            | J_ONIT1    |  |  |
| PROPNN = CH2O + NO2 + CO + MO2                                                                                      | J_ONIT1    |  |  |
| ATOOH = OH + CH2O + MCO3                                                                                            | J_ROOH     |  |  |

--Bob Y. 13:48, 12 May 2014 (EDT)

## RIP+OH

Follow SAR rules assuming a  $C(OOH) = 2 * C(OH) = 7$  (for the abstraction of the H alpha of the peroxide group). (see Kwok 1995 paper)

Assume that the abstraction of the peroxide H has a constant rate @298K of  $3.6 \times 10^{-12}$

This gives for RIP:

```

43% 3.6e-12 (1,2)
28% 3.6e-12+7*1.94e-12 (4,3)
29% 3.6e-12+7*0.937e-12 (1,4)+(4,1) (I neglected 3,4 and 2,1)
9.3e-12@298K (4.75e-12*exp(200/T))
0.387 not recycling

```

Therefore  $0.387 = 3.6/9.3$ .  $RIP + OH = 0.387RIO_2 + 0.613OH + 0.613HC_5$ .

# Updates to the Paulot isoprene scheme

## NO<sub>3</sub> aerosol reactive uptake coefficient

*This update was tested in the 1-month benchmark simulation v9-02g and approved on 24 Mar 2013.*

The NO<sub>3</sub> aerosol reactive uptake coefficient (gamma) has been increased from 1.0E-04 (Jacob et al., 2000) to 0.1 following Mao et al. (2013, submitted). In globchem.dat, we now have:

|   |            |          |         |       |      |    |    |
|---|------------|----------|---------|-------|------|----|----|
| A | 415        | 6.20E+01 | 1.0E-01 | 0 0 K | 0.00 | 0. | 0. |
|   | NO3        |          | +       |       |      |    |    |
|   | =1.000HNO3 |          | +       |       | +    |    | +  |
| + |            |          | +       |       | +    |    | +  |
| + |            |          | +       |       | +    |    | +  |
| + |            |          | +       |       | +    |    | +  |

--Melissa Sulprizio 12:44, 11 July 2013 (EDT)

There are two reasons for this modification.

1. First, a few recent papers show potential high gamma(NO<sub>3</sub>) on all types of aerosols.
2. Second, gamma(NO<sub>3</sub>) is supposed to increase at lower temperature (driven by its Henry's law constant), while most laboratory measurements are conducted at 298 K.

From the tests I have done so far, ozone seems to be insensitive to gamma(NO<sub>3</sub>) in the range of 0.0001-0.1.

--Jmao 13:11, 11 July 2013 (EDT)

## Update One - RO<sub>2</sub>+HO<sub>2</sub> Reaction Rate

*This update was tested in the 1-month benchmark simulation v9-02g and approved on 24 Mar 2013.*

Update applied to all >C<sub>2</sub> RO<sub>2</sub> species reaction with HO<sub>2</sub>. These include, in the standard scheme, R<sub>4</sub>O<sub>2</sub>, R<sub>4</sub>N<sub>1</sub>, KO<sub>2</sub>, RIO<sub>2</sub>, RIO<sub>1</sub>, IAO<sub>2</sub>, ISN<sub>1</sub>, VRO<sub>2</sub>, MRO<sub>2</sub>, MVN<sub>2</sub>, MAN<sub>2</sub>, B<sub>3</sub>O<sub>2</sub>, INO<sub>2</sub>, PRN<sub>1</sub>, A<sub>3</sub>O<sub>2</sub>, PO<sub>2</sub>.

**Old RO<sub>2</sub>+HO<sub>2</sub> reaction rate:**  $k = 7.40\text{E-}13 \cdot \text{EXP}(700/T)$

**New RO<sub>2</sub>+HO<sub>2</sub> reaction rate:**  $k = 2.91\text{E-}13 \cdot \text{EXP}(1300/T) [1 - \text{EXP}(-0.245 \cdot n)]$ , where n=no. of carbon atoms

Comparison of new and old RO<sub>2</sub>+HO<sub>2</sub> reaction rates for C<sub>4</sub> RO<sub>2</sub> and C<sub>5</sub> RO<sub>2</sub>:

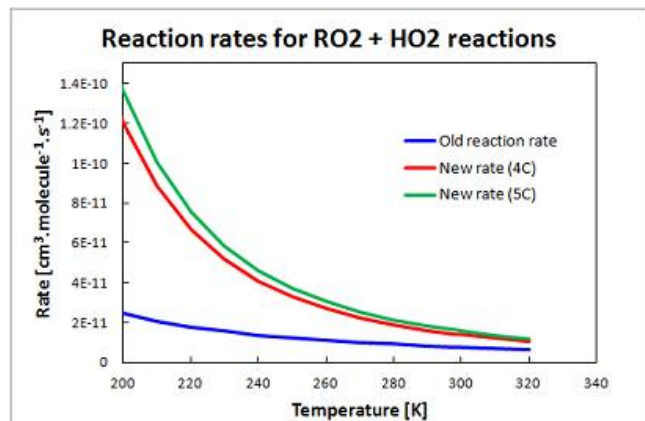

Benchmarking for this update can be viewed at: (Benchmarking results for RO<sub>2</sub>+HO<sub>2</sub> reaction (<ftp://ftp.as.harvard.edu/pub/exchange/elaine/IsopChemUpdate/RO2+HO2/>))

**Note:** this is applied to RIO<sub>2</sub>, VRO<sub>2</sub>, MRO<sub>2</sub>, MAN<sub>2</sub>, INO<sub>2</sub>, HC500, ISOPNBO<sub>2</sub>, ISOPNDO<sub>2</sub>, MACRNO<sub>2</sub>, DIBOO, MOBAOO in the new isoprene chemistry, but not MAO<sub>3</sub>, MCO<sub>3</sub>, RCO<sub>3</sub> radicals (acetyl peroxy type radicals).

--Bob Y. 13:49, 12 May 2014 (EDT)

## Update Two - Transport of RIP

RIP = isoprene peroxide species formed at low-NO<sub>x</sub> (i.e. via the RO<sub>2</sub>+HO<sub>2</sub> pathway)



This benchmark is done to understand the muted influence of the increased rate of the RO<sub>2</sub>+HO<sub>2</sub> reaction on CH<sub>2</sub>O. Is this because the ultimate yield of CH<sub>2</sub>O is similar for all levels of NO<sub>x</sub> and RIP is not transported, leading to the realization of the ultimate yield of CH<sub>2</sub>O in the same grid box as its emission source?

Both schemes are run with initial concentrations of species set to zero. As RIP is added as an additional transported species this was viewed as the most effective way of comparing the two model runs.

Benchmarking for this update can be viewed at: (Benchmarking results for transporting RIP  
(<ftp://ftp.as.harvard.edu/pub/exchange/elaine/IsopChemUpdate/RIPTransport/>))

--Bob Y. 13:50, 12 May 2014 (EDT)

## Updates 02/04/2013

These reactions are updated from the beta-version of Paulot scheme.

| Old reaction                                                                                                                                                                                                        | Old rate                                                                                             | New reaction                                                                                                                                                               | New rate                                                  | Note                                                                                                           |
|---------------------------------------------------------------------------------------------------------------------------------------------------------------------------------------------------------------------|------------------------------------------------------------------------------------------------------|----------------------------------------------------------------------------------------------------------------------------------------------------------------------------|-----------------------------------------------------------|----------------------------------------------------------------------------------------------------------------|
| KO <sub>2</sub> +HO <sub>2</sub> =OH +ALD <sub>2</sub> +MCO <sub>3</sub>                                                                                                                                            | 7.40E-13<br>exp(700/T)                                                                               | KO <sub>2</sub> + HO <sub>2</sub> = 0.15OH +0.15ALD <sub>2</sub> +0.15<br>MCO <sub>3</sub> + 0.85 ATOOH                                                                    | 2.91E-<br>13*EXP(1300/T)<br>[1-<br>EXP(-0.245*n)],<br>n=4 | Assuming 15%<br>recycling of<br>OH, consistent<br>with MCM.<br>Rate is also<br>from Saunders<br>et al. (2003). |
| MRO <sub>2</sub> +HO <sub>2</sub> =0.020MRP+0.980OH<br>+0.980HO <sub>2</sub> +0.294CH <sub>2</sub> O+0.686HAC<br>+0.294MGLY +0.686CO                                                                                | 7.40E-13<br>exp(700/T)                                                                               | MRO <sub>2</sub> + HO <sub>2</sub> = 1.0MRP                                                                                                                                | 2.91E-<br>13*EXP(1300/T)<br>[1-<br>EXP(-0.245*n)],<br>n=4 | Isomerization<br>of MRO <sub>2</sub> is<br>already taken<br>into account in<br>another<br>reaction.            |
| MAN <sub>2</sub> + HO <sub>2</sub> = 0.5PROPNN + 0.5CO +<br>0.5HO <sub>2</sub> + 0.5MGLY + 0.5CH <sub>2</sub> O +<br>0.5NO <sub>2</sub> + OH                                                                        | 7.40E-13<br>exp(700/T)                                                                               | MAN <sub>2</sub> + HO <sub>2</sub> = 0.075PROPNN +<br>0.075CO + 0.075HO <sub>2</sub> + 0.075MGLY +<br>0.075CH <sub>2</sub> O + 0.075NO <sub>2</sub> + 0.15OH +<br>0.85ISNP | 2.91E-<br>13*EXP(1300/T)<br>[1-<br>EXP(-0.245*n)],<br>n=4 | assuming 15%<br>recycling                                                                                      |
| INO <sub>2</sub> + HO <sub>2</sub> = 0.5INPN + 0.5ISOPND +<br>0.5OH + 0.5HO <sub>2</sub>                                                                                                                            | 7.40E-13<br>exp(700/T)                                                                               | INO <sub>2</sub> + HO <sub>2</sub> = INPN                                                                                                                                  | 2.91E-<br>13*EXP(1300/T)<br>[1-<br>EXP(-0.245*n)],<br>n=5 | See nighttime<br>chemistry                                                                                     |
| MAO <sub>3</sub> + HO <sub>2</sub> = 0.87OH +0.03O <sub>3</sub> +<br>0.435CH <sub>2</sub> O + 0.435MO <sub>2</sub> + 0.1MAOP +<br>0.030RCOOH + 0.283HAC + 0.152ATO <sub>2</sub><br>+ 0.870CO <sub>2</sub> + 0.435CO | 4.3E-<br>13exp(1040/T)                                                                               | MAO <sub>3</sub> + HO <sub>2</sub> = 0.44OH +0.15O <sub>3</sub> +<br>0.59CH <sub>2</sub> O + 0.39MO <sub>2</sub> + 0.41MAOP +<br>0.39CO                                    | 4.3E-<br>13exp(1040/T)                                    | use MCM, 44%<br>OH channel,<br>15% O <sub>3</sub><br>channel, 41%<br>peroxide<br>channel.                      |
| PMN + OH = 1.000PMNO <sub>2</sub>                                                                                                                                                                                   | 3.20E-11                                                                                             | PMN + OH = HAC + CO + NO <sub>2</sub>                                                                                                                                      | 2.90E-11                                                  | from MCM                                                                                                       |
| PMNO <sub>2</sub> + NO = 0.6CO <sub>2</sub> + 0.6HAC +<br>0.6NO <sub>3</sub> + 0.4CH <sub>2</sub> O + 0.4HO <sub>2</sub> +<br>0.4PYPAN + 0.900NO <sub>2</sub>                                                       | K* (1-YN)<br>where YN<br>is returned from<br>fyrno3.f;<br>K=2.7E-12<br>exp(350/T)<br>(Xcarbn=4.0E00) |                                                                                                                                                                            |                                                           | we now remove<br>all reactions<br>from PMN<br>following<br>MCM.                                                |
| PMNO <sub>2</sub> + NO=PMNN                                                                                                                                                                                         | K* YN where<br>YN is returned<br>from fyrno3.f;<br>K=2.7E-12<br>exp(350/T)<br>(Xcarbn=4.0E00)        |                                                                                                                                                                            |                                                           |                                                                                                                |
| PMNO <sub>2</sub> + HO <sub>2</sub> = 0.6CO <sub>2</sub> + 0.6HAC +                                                                                                                                                 | 7.4E-                                                                                                |                                                                                                                                                                            |                                                           |                                                                                                                |

|                                                                                                            |                                                                                      |                                                                                                                              |                                             |                                                           |
|------------------------------------------------------------------------------------------------------------|--------------------------------------------------------------------------------------|------------------------------------------------------------------------------------------------------------------------------|---------------------------------------------|-----------------------------------------------------------|
| 0.6NO <sub>3</sub> + 0.4CH <sub>2</sub> O + 0.4HO <sub>2</sub> + 0.4PYPAN + 0.5R <sub>4</sub> P + 0.5OH    | 13exp(700/T)                                                                         |                                                                                                                              |                                             |                                                           |
| PYPO <sub>2</sub> + NO <sub>2</sub> + M = PYPAN                                                            | LPL: 9.0E-28(300/T) <sup>8.9</sup><br>HPL: 7.70E-12(300/T) <sup>0.2</sup><br>Fc: 0.6 |                                                                                                                              |                                             |                                                           |
| PYPAN = PYPO <sub>2</sub> + NO <sub>2</sub>                                                                | 9.0E-29exp(14000/T)                                                                  |                                                                                                                              |                                             |                                                           |
| PYPO <sub>2</sub> + NO = CO <sub>2</sub> + MCO <sub>3</sub> + NO <sub>2</sub>                              | 2.7E-12exp(350/T)                                                                    |                                                                                                                              |                                             |                                                           |
| PYPO <sub>2</sub> + HO <sub>2</sub> = CO <sub>2</sub> + MCO <sub>3</sub> + OH                              | 7.40E-13exp(700/T)                                                                   |                                                                                                                              |                                             |                                                           |
| PYPAN = 0.300NO <sub>3</sub> + 0.700NO <sub>2</sub> + MCO <sub>3</sub> + CO <sub>2</sub>                   | photolysis                                                                           |                                                                                                                              |                                             |                                                           |
| PYPAN = NO <sub>3</sub> + MCO <sub>3</sub> + CO <sub>2</sub>                                               | photolysis                                                                           |                                                                                                                              |                                             |                                                           |
| PP + OH = 0.791OH + 0.209PO <sub>2</sub> + 0.791RCHO                                                       | 8.78E-12exp(200/T)                                                                   | PP + OH = 0.791OH + 0.209PO <sub>2</sub> + 0.791HAC                                                                          |                                             |                                                           |
| DIBOO + HO <sub>2</sub> = HO <sub>2</sub> + OH + 0.52GLYC + 0.52MGLY + 0.48HAC + 0.48GLYX                  | 7.4E-13exp(700/T)                                                                    | DIBOO + HO <sub>2</sub> = 0.15HO <sub>2</sub> + 0.15OH + 0.078GLYC + 0.078MGLY + 0.072HAC + 0.072GLYX + 0.85R <sub>4</sub> P | 2.91E-13*EXP(1300/T) [1-EXP(-0.245*n)], n=5 | assume 15% recycling of OH, rest goes to R <sub>4</sub> P |
| MOBAOO + HO <sub>2</sub> = 0.5OH + 0.5HO <sub>2</sub> + 0.5RCHO + 0.5CO <sub>2</sub> + 0.5R <sub>4</sub> P | 7.4E-13exp(700/T)                                                                    | MOBAOO + HO <sub>2</sub> = 0.15OH + 0.15HO <sub>2</sub> + 0.15RCHO + 0.15CO <sub>2</sub> + 0.85R <sub>4</sub> P              | 2.91E-13*EXP(1300/T) [1-EXP(-0.245*n)], n=5 | assume 15% recycling of OH, rest goes to R <sub>4</sub> P |
| IEPOXOO + HO <sub>2</sub> =                                                                                | 7.4E-13exp(700/T)                                                                    |                                                                                                                              | 2.91E-13*EXP(1300/T) [1-EXP(-0.245*n)], n=5 |                                                           |
| MAOPO <sub>2</sub> + HO <sub>2</sub> =                                                                     | 7.4E-13exp(700/T)                                                                    |                                                                                                                              | 2.91E-13*EXP(1300/T) [1-EXP(-0.245*n)], n=4 |                                                           |
| HC5OO + HO <sub>2</sub> =                                                                                  | 7.4E-13exp(700/T)                                                                    |                                                                                                                              | 2.91E-13*EXP(1300/T) [1-EXP(-0.245*n)], n=5 |                                                           |
| ISOPNDO <sub>2</sub> + HO <sub>2</sub> =                                                                   | 7.4E-13exp(700/T)                                                                    |                                                                                                                              | 2.91E-13*EXP(1300/T) [1-EXP(-0.245*n)], n=5 |                                                           |
| ISOPNBO <sub>2</sub> + HO <sub>2</sub> =                                                                   | 7.4E-13exp(700/T)                                                                    |                                                                                                                              | 2.91E-13*EXP(1300/T) [1-EXP(-0.245*n)], n=5 |                                                           |
| MACRNO <sub>2</sub> + HO <sub>2</sub> =                                                                    | 7.4E-13exp(700/T)                                                                    |                                                                                                                              | 2.91E-13*EXP(1300/T) [1-EXP(-0.245*n)], n=4 |                                                           |

## Updates to be implemented

The following updates have not yet been added to GEOS-Chem as of this writing (May 2013):

### Remove duplicate GLYX product from RIO2 reaction

*This update was validated in the 1-month benchmark simulation v10-01d and approved on 03 Jun 2014.*

Ploy Achakulwisut found a typo in this reaction for RIO2 (in file `globchem.dat`). The product `0.5GLYX` was listed twice but should have been listed just once. The fix is as described below.

| Old reaction                                                                                                                                                 | Old rate                               | New reaction                                                                                                                                | New rate | Note              |
|--------------------------------------------------------------------------------------------------------------------------------------------------------------|----------------------------------------|---------------------------------------------------------------------------------------------------------------------------------------------|----------|-------------------|
| $\text{RIO2} = 2.0\text{HO2} + 1.0\text{CH2O} + 0.5\text{MGLY} + 0.5\text{GLYC} + \mathbf{0.5\text{GLYX}} + 0.5\text{GLYX} + 0.500\text{HAC} + 1.0\text{OH}$ | $4.07\text{E}+08 \exp(-7694/\text{T})$ | $\text{RIO2} = 2.0\text{HO2} + 1.0\text{CH2O} + 0.5\text{MGLY} + 0.5\text{GLYC} + \mathbf{0.5\text{GLYX}} + 0.500\text{HAC} + 1.0\text{OH}$ | same     | To balance carbon |

--Bob Y. 13:53, 12 May 2014 (EDT)

## References

- Butkovskaya, N. I., Pouvesle, N., Kukui, A., and Le Bra, G.: Mechanism of the OH-initiated oxidation of glycolaldehyde over the temperature range 233-296 K, *J. Phys. Chem. A*, 110, 13492-13499, 10.1021/jp064993k, 2006a.
- Butkovskaya, N. I., Pouvesle, N., Kukui, A., Mu, Y. J., and Le Bras, G.: Mechanism of the OH-initiated oxidation of hydroxyacetone over the temperature range 236-298 K, *J. Phys. Chem. A*, 110, 6833-6843, 10.1021/jp056345r, 2006b.
- Chuong, B., and Stevens, P.: Measurements of the kinetics of the OH-initiated oxidation of methyl vinyl ketone and methacrolein, *Int. J. Chem. Kinet.*, 36, 12-25, 2004.
- Crounse, J. D., Paulot, F., Kjaergaard, H. G., and Wennberg, P. O.: Peroxy radical isomerization in the oxidation of isoprene, *Phys. Chem. Chem. Phys.*, 13, 13607-13613, 10.1039/C1CP21330J 2011.
- Crounse, J. D., Knap, H. C., Ørnsø, K. B., Jørgensen, S., Paulot, F., Kjaergaard, H. G., and Wennberg, P. O.: Atmospheric Fate of Methacrolein. 1. Peroxy Radical Isomerization Following Addition of OH and O<sub>2</sub>, *The Journal of Physical Chemistry A*, 116, 5756-5762, 10.1021/jp211560u, 2012.
- Dillon, T. J., and Crowley, J. N.: Direct detection of OH formation in the reactions of HO<sub>2</sub> with CH<sub>3</sub>C(O)O-2 and other substituted peroxy radicals, *Atmos. Chem. Phys.*, 8, 4877-4889, 2008.
- Ito, A., Sillman, S., and Penner, J. E.: Effects of additional nonmethane volatile organic compounds, organic nitrates, and direct emissions of oxygenated organic species on global tropospheric chemistry, *J. Geophys. Res.-Atmos.*, 112, 10.1029/2005jd006556, 2007.
- Jenkin, M. E., Saunders, S. M., and Pilling, M. J.: The tropospheric degradation of volatile organic compounds: a protocol for mechanism development, *Atmos. Environ.*, 31, 81-104, [http://dx.doi.org/10.1016/S1352-2310\(96\)00105-7](http://dx.doi.org/10.1016/S1352-2310(96)00105-7), 1997.
- Kwok, E. S. C., and Atkinson, R.: Estimation of hydroxyl radical reaction-rate constants for gas-phase organic-compounds using a structure-reactivity relationship - an update, *Atmos. Environ.*, 29, 1685-1695, 10.1016/1352-2310(95)00069-b, 1995.
- Lockwood, A. L., Shepson, P. B., Fiddler, M. N., and Alaghmand, M.: Isoprene nitrates: preparation, identification, yields, and atmospheric chemistry, *Atmos. Chem. Phys.*, 10, 6169-6178, 10.5194/acp-10-6169-2010, 2010.
- Lurmann, F. W., Lloyd, A. C., and Atkinson, R.: A chemical mechanism for use in long-range transport acid deposition computer modeling, *J. Geophys. Res.-Atmos.*, 91, 905-936, 1986.
- Madronich, S., and Calvert, J. G.: Permutation reactions of organic peroxy radicals in the troposphere, *Journal of Geophysical Research: Atmospheres*, 95, 5697-5715, 10.1029/JD095iD05p05697, 1990.
- Mao, J., F. Paulot, D.J. Jacpb, R.C. Cohen, J.D. Crounse, P.O. Wennberg, C.A. Keller, R.C. Hudman, M.P. Barkley, and L.W. Horowitz, Ozone and organic nitrates over the eastern United States: sensitivity to isoprene chemistry, *Journal of Geophysical Research: Atmospheres*, 118, doi:10.1002/jgrd.50817, 2013, <http://dx.doi.org/10.1002/jgrd.50817>.
- Marais, E. A., Jacob, D. J., Kurosu, T. P., Chance, K., Murphy, J. G., Reeves, C., Mills, G., Casadio, S., Millet, D. B., Barkley, M. P., Paulot, F., and Mao, J.: Isoprene emissions in Africa inferred from OMI observations of formaldehyde columns, *Atmos. Chem. Phys.*, 12, 6219-6235, 10.5194/acp-12-6219-2012, 2012.
- Master Chemical Mechanism, MCM v3.2 (Jenkin et al., Atmos. Environ., 31, 81, 1997; Saunders et al., Atmos. Chem. Phys., 3, 161, 2003), via website: <http://mcm.leeds.ac.uk/MCM>.
- Orlando, J. J., Tyndall, G. S., Bertman, S. B., Chen, W., and Burkholder, J. B.: Rate coefficient for the reaction of OH with CH<sub>2</sub>=C(CH<sub>3</sub>)C(O)OONO<sub>2</sub> (MPAN), *Atmos. Environ.*, 36, 1895-1900, [http://dx.doi.org/10.1016/S1352-2310\(02\)00090-0](http://dx.doi.org/10.1016/S1352-2310(02)00090-0), 2002.
- Paulot, F., Crounse, J. D., Kjaergaard, H. G., Kroll, J. H., Seinfeld, J. H., and Wennberg, P. O.: Isoprene photooxidation: new insights into the production of acids and organic nitrates, *Atmos. Chem. Phys.*, 9, 1479-1501, 2009a.
- Paulot, F., Crounse, J. D., Kjaergaard, H. G., Kurten, A., St Clair, J. M., Seinfeld, J. H., and Wennberg, P. O.: Unexpected Epoxide Formation in the Gas-Phase Photooxidation of Isoprene, *Science*, 325, 730-733, 10.1126/science.1172910, 2009b.
- Peeters, J., Nguyen, T. L., and Vereecken, L.: HO<sub>x</sub> radical regeneration in the oxidation of isoprene, *Phys. Chem. Chem. Phys.*, 11, 5935-5939, 10.1039/b908511d, 2009.
- Peeters, J., and Müller, J. F.: HO<sub>x</sub> radical regeneration in isoprene oxidation via peroxy radical isomerisations. II: experimental evidence and global impact, *Phys. Chem. Chem. Phys.*, 12, 14227-14235, 10.1039/c0cp00811g, 2010.
- Rollins, A. W., Kiendler-Scharr, A., Fry, J. L., Brauers, T., Brown, S. S., Dorn, H. P., Dubé, W. P., Fuchs, H., Mensah, A., Mentel, T. F.,

- Rohrer, F., Tillmann, R., Wegener, R., Wooldridge, P. J., and Cohen, R. C.: Isoprene oxidation by nitrate radical: alkyl nitrate and secondary organic aerosol yields, Atmos. Chem. Phys., 9, 6685-6703, 10.5194/acp-9-6685-2009, 2009.
22. Saunders, S. M., Jenkin, M. E., Derwent, R. G., and Pilling, M. J.: Protocol for the development of the Master Chemical Mechanism, MCM v3 (Part A): tropospheric degradation of non-aromatic volatile organic compounds, Atmos. Chem. Phys., 3, 161-180, 2003.
23. Sander, S. P., J. Abbatt, J. R. Barker, J. B. Burkholder, R. R. Friedl, D. M. Golden, R. E. Huie, C. E. Kolb, M. J. Kurylo, G. K. Moortgat, V. L. Orkin and P. H. Wine "Chemical Kinetics and Photochemical Data for Use in Atmospheric Studies, Evaluation No. 17," JPL Publication 10-6, Jet Propulsion Laboratory, Pasadena, 2011 <http://jpldataeval.jpl.nasa.gov>.
24. Stavrou, T., Peeters, J., and Muller, J. F.: Improved global modelling of HOx recycling in isoprene oxidation: evaluation against the GABRIEL and INTEX-A aircraft campaign measurements, Atmos. Chem. Phys., 10, 9863-9878, 10.5194/acp-10-9863-2010, 2010.
25. Tyndall, G. S., Cox, R. A., Granier, C., Lesclaux, R., Moortgat, G. K., Pilling, M. J., Ravishankara, A. R., and Wallington, T. J.: Atmospheric chemistry of small organic peroxy radicals, Journal of Geophysical Research: Atmospheres, 106, 12157-12182, 10.1029/2000jd900746, 2001.
26. Vaghjiani, G. L., and Ravishankara, A. R.: Kinetics and mechanism of hydroxyl radical reaction with methyl hydroperoxide, The Journal of Physical Chemistry, 93, 1948-1959, 10.1021/j100342a050, 1989.
27. Xie, Y., Paulot, F., Carter, W. P. L., Nolte, C. G., Luecken, D. J., Hutzell, W. T., Wennberg, P. O., Cohen, R. C., and Pinder, R. W.: Understanding the impact of recent advances in isoprene photooxidation on simulations of regional air quality, Atmos. Chem. Phys. Discuss., 12, 27173-27218, 10.5194/acpd-12-27173-2012, 2012.

--Bob Y. 13:55, 12 May 2014 (EDT)

Retrieved from "[http://wiki.seas.harvard.edu/geos-chem/index.php?title=New\\_isoprene\\_scheme&oldid=17495](http://wiki.seas.harvard.edu/geos-chem/index.php?title=New_isoprene_scheme&oldid=17495)"

- 
- This page was last modified on 3 June 2014, at 17:28.
  - This page has been accessed 12,020 times.
