# Supplementary material for: The Framework for 0-D Atmospheric Modeling (F0AM) v3.1
Source: Copernicus journal article supplement (doi:10.5194/gmd-2016-175), 2016-07-08
Supplement: Supplementary file 1 [file PhotoDataSources.xlsx]

## Sheet: Sheet1
	Mechanism Names					Cross Section				Quantum Yield				Method Compare (SZA=0)
Species/Reaction	MCM	CB05/CB6r2	RACM2	GEOS-Chem		File(s)	Source	Last Update		File(s)	Source	Last Update		HYB/TUV	HYB/MCM
O3 -> O1D	J1	JO1D	JO1D	JO1D		Cross_Section_O3.m, Cross_Section_O3.csv	JPL	2016-02-22		Quantum_Yield_O3_O1D.csv	JPL	2016-02-22		0.989355	1.65944
O3 -> O	J2	JO3P	JO3P					2016		Quantum_Yield_O3_O3P.csv		2016		0.835761	1.14977
H2O2	J3	JH2O2	JH2O2	JH2O2		Cross_Section_H2O2.m, Cross_Section_H2O2.csv	JPL	2012						0.914327	1.44772
NO2	J4	JNO2	JNO2	JNO2		Cross_Section_NO2.m, Cross_Section_NO2.csv	IUPAC	2012		Quantum_Yield_NO2.m, Quantum_Yield_NO2.csv	IUPAC	2012		0.99601	1.60119
NO3 -> NO	J5	JNO3_NO	JNO3_NO	JNO3_NO		Cross_Section_NO3.m, Cross_Section_NO3.csv	IUPAC	2012		Quantum_Yield_NO3_NO.csv	JPL	2012		0.979217	1.34858
NO3 -> NO2 + O	J6	JNO3_NO2	JNO3_NO2	JNO3_NO2						Quantum_Yield_NO3_NO2.csv	JPL	2012		0.987395	1.59216
HONO	J7	JHONO	JHONO	JHONO		Cross_Section_HONO.csv	IUPAC	2012						1.0716	1.28763
HNO3	J8	JHNO3	JHNO3	JHNO3		Cross_Section_HNO3.m, Cross_Section_HNO3.csv	JPL	2012						1.04789	1.66123
HCHO -> H + HCO	J11	JHCHO_R	JHCHO_HO2	JHCHO_HO2		Cross_Section_HCHO.m, Cross_Section_HCHO.csv	JPL	2016-03-03		Quantum_Yield_HCHO.csv	JPL	2012		1.09223	1.90859
HCHO -> H2 + CO	J12	JHCHO_M	JHCHO_H2	JHCHO_H2						Quantum_Yield_HCHO_H2.m	JPL			1.10591	1.78144
CH3CHO->CH3 + HCO	J13	JCCHO_R	JACD	JALD2		Cross_Section_CH3CHO.csv	IUPAC	2016		Quantum_Yield_CH3CHO_CH3.m	IUPAC	2016-02-26		1.05505	2.1529
C2H5CHO	J14	JC2CHO	JALD	JRCHO		Cross_Section_C2H5CHO.csv	IUPAC	2016		Quantum_Yield_C2H5CHO.csv	Chen and Zhu J. Phys. Chem. A., 105, 9689 (2001)	2016		0.655073	1.0666
C3H7CHO -> C3H7 + CHO	J15					Cross_Section_C3H7CHO.csv	IUPAC	2012		Quantum_Yield_C3H7CHO_C3H7.m	IUPAC	2016		NaN	1.14218
C3H7CHO -> C2H4 +CH3CHO	J16									Quantum_Yield_C3H7CHO_C2H4.m	IUPAC			NaN	0.906598
IPRCHO	J17					Cross_Section_IPRCHO.csv	IUPAC	2016		Quantum_Yield_IPRCHO.csv	IUPAC	2016		NaN	1.88326
MACR -> CH2CCH3 + HCO	J18		JMACR	JMACR		Cross_Section_MACR.csv	IUPAC	2016			JPL	2016		1.01666	3.82696
MACR -> CH2C(CH3)CO + H	J19		JMACR	JMACR							JPL			1.01666	3.82696
HPALD	J20	JHPLD		JHPALD		Cross_Section_MACR.csv	IUPAC	2016			Wolfe 2012	2016		1.01666	1.49252
CH3COCH3	J21	JACET	JACT	JACET		Cross_Section_CH3COCH3.m, Cross_Section_CH3COCH3.csv	IUPAC	2016		Quantum_Yield_CH3COCH3.csv	IUPAC	2016		0.466015	1.16526
MEK	J22	JMEK	JMEK	JMEK		Cross_Section_MEK.csv	IUPAC	2012		0.34	IUPAC	2016		0.654031	2.02072
MVK -> CH3CHCH2 + CO	J23		JMVK	JMVK		Cross_Section_MVK.csv	IUPAC	2012		Quantum_Yield_MVK.m	IUPAC	2012		1.04456	2.19409
MVK -> CH3CO + CH2CH	J24		JMVK	JMVK										1.04456	2.19409
GLYOX -> 2CO + H2	J31	JGLY	JGLY1	JGLYb		Cross_Section_GLYOX.csv	JPL	2016-03-03		Quantum_Yield_GLYOX_H2.m	JPL	2016-03-03		1.04858	0.540525
GLYOX -> HCHO + CO	J32	JGLY	JGLY2	JGLYb						Quantum_Yield_GLYOX_HCHO.m	JPL	2016-03-03		1.04808	6.34621
GLYOX -> 2HCO	J33	JGLY	JGLY3	JGLYa						Quantum_Yield_GLYOX_HCO.m	JPL	2016-03-03		1.01442	4.25744
MGLYOX	J34	JMGLY	JMGLY; JDCB1; JDCB2	JMGLY		Cross_Section_MGLYOX.csv	JPL	2016		Quantum_Yield_MGLYOX.m	IUPAC	2016-03-03		1.29014	2.10207
BIACET	J35					Cross_Section_BIACET.csv	IUPAC	2012						1.00041	1.57601
CH3OOH	J41	JCOOH, JMEPX	JOP1, JOP2	JMP		Cross_Section_CH3OOH.csv	IUPAC	2012						1.05295	1.69457
CH3NO3	J51			JR4N2		Cross_Section_CH3NO3.m, Cross_Section_CH3NO3.csv	IUPAC	2012						1.06508	1.40575
C2H5NO3	J52					Cross_Section_C2H5NO3.m, Cross_Section_C2H5NO3.csv	IUPAC	2012						1.05301	1.92903
NC3H7NO3	J53			JONIT1		Cross_Section_NC3H7NO3.csv	IUPAC	2012						1.0447	1.98716
IC3H7NO3	J54	JNTR	JONIT			Cross_Section_IC3H7NO3.m, Cross_Section_IC3H7NO3.csv	IUPAC	2016						NaN	1.44734
TC4H9NO3	J55					Cross_Section_TC4H9NO3.csv	IUPAC	2016		1	IUPAC	2016		1.06162	0.418894
NOA -> CH3COCH2O + NO2	J56			JPROPNN, JETHLN,JMVKN,JMACRN		Cross_Section_NOA.csv	http://mcm.leeds.ac.uk/MCM/parameters/photolysis/NOA/noa_barnes93_cs_298.txt	2012		Quantum_Yield_NOA_1.csv, Quantum_Yield_NOA_2.csv	http://mcm.leeds.ac.uk/MCM/parameters/photolysis/NOA/noa_estimated_qy_298.txt	2012		1.06387	1.71794
NOA -> CH3CO + HCHO + NO2	J57													1.18208	NaN
SPECIES NOT IN MCM
Crotonaldehyde (CH3CHCHCHO)	Jn1		JUALD			Cross_Section_CH3CHCHCHO.csv	http://pubs.acs.org/doi/pdf/10.1021/jp013413a	2016-02-24						NaN	NaN
Benzaldehyde (C6H5COH)	Jn2		JBALD			Cross_Section_C6H5COH.csv	IUPAC	2016-02-24						NaN	NaN
3-Pentanone (diethylketone) (C2H5COC2H5)	Jn3		JKET,JHKET			Cross_Section_C2H5COC2H5.csv	http://torpedo.nrl.navy.mil/tu/ps/doc.html?dsn=4968462	2016-02-24						NaN	NaN
Peroxyacetic acid (CH3COOOH)	Jn4		JPAA			Cross_Section_CH3COOOH.csv	JPL	2016-02-26						1.05546	NaN
CH3CHO->CH4+CO	Jn5			JALD2b		Cross_Section_CH3CHO.csv(the same as leeds values)	IUPAC	2016-02-26		Quantum_Yield_CH3CHO_CH4.m	IUPAC	2016-02-26		0.978867	NaN
CH3CHO->CH3CO+H	Jn6					Cross_Section_CH3CHO.csv(the same as leeds values)	IUPAC	2016-02-26		Quantum_Yield_CH3CHO_CH3CO.m	IUPAC	2016-02-26		Inf	NaN
[reserved]	Jn7
CH3COCH3	Jn8			JACETb		Cross_Section_CH3COCH3.csv; Cross_section_CH3COCH3.m	IUPAC	2016-02-26		Quantum_Yield_CH3COCH3_CO.csv; Quantum_Yield_CH3COCH3_CO.m	IUPAC	2016-02-26		NaN	NaN
Glycoaldehyde (OHCH2CHO)	Jn9	JGLYD		JGLYC		Cross_Section_GLYCOALDEHYDE.csv	IUPAC	2/23.2016						0.883981	NaN
Hydroxyacetone (CH3COCH2OH)	Jn10			JHAC		Cross_Section_Hydroxyaceton.csv	IUPAC	2/23.2016						1.0011	NaN
Acrolein (CH2CHCHO)	Jn11	JACRO				Cross_Section_Acrolein.csv	JPL	2/23.2016		Quantum_Yield_Acrolein.m	JPL	2016-02-23		1.01026	NaN
3CH3C6H3(OH)NO2 (cresol)	Jn12	JCRON				Cross_Section_3_methy_2_nitrophenol.csv; 4_methyl_2_nitrophenol.csv	IUPAC	2/23.2016						NaN	NaN
4CH3C6H3(OH)NO2 (cresol)	Jn13	JCRON												NaN	NaN
PAN -> NO2	Jn14	JPAN	JPAN1	JPAN		Cross_Section_PAN.csv;Cross_Section_PAN.m	IUPAC	2/23.2016		Quantum_Yield_PAN_NO2.csv; Quantum_Yield_PAN_NO3.csv	IUPAC	2016-02-23		0.913558	NaN
PAN -> NO3	Jn15	JPAN	JPAN2	JPAN										1.42295	NaN
CH3O2NO2 -> NO2	Jn16			JMPN		Cross_Section_CH3O2NO2.csv	IUPAC	2016-02-26						1.02233	NaN
CH3O2NO2 -> NO3	Jn17			JMPN										NaN	NaN
CH3ONO	Jn18					Cross_Section_CH3ONO_JPL.csv	JPL	2/23.2016						NaN	NaN
N2O5 -> NO3 + NO2	Jn19	JN2O5		JN2O5_NO2		Cross_Section_N2O5.csv;Cross_Section_N2O5.m	IUPAC	2/23.2016		Quantum_Yield_N2O5_NO3_NO2.csv; Quantum_Yield_N2O5_NO3_NO_O.csv	IUPAC	2016-02-23		0.941824	NaN
N2O5 -> NO3 + NO + O	Jn20	JN2O5		JN2O5_NO										Inf	NaN
HO2NO2 -> HO2 + NO2	Jn21	JHO2NO2		JHNO4		Cross_Section_HO2NO2.csv	IUPAC	2/23.2016						0.892817	NaN
HO2NO2 -> HO + NO3	Jn22	JHO2NO2		JHNO4										0.892817	NaN
CLNO2	Jn23					Cross_Section_ClNO2.csv; Cross_Section_ClNO2.m	IUPAC	2/23.2016						0.789089	NaN
Br2	Jn24			JBr2		Cross_Section_Br2.csv	IUPAC	2016-02-24						1.01865	NaN
BrO	Jn25			JBrO		Cross_Section_BrO.csv	IUPAC	2016-02-24						1.02336	NaN
HOBr	Jn26			JHOBr		Cross_Section_HOBr.csv	IUPAC	2016-02-24						1.05855	NaN
BrNO2	Jn27			JBrNO2		Cross_Section_BrNO2.csv	IUPAC	2016-02-24						1.26565	NaN
BrONO2 -> Br + NO3	Jn28			JBrNO3_Br		Cross_Section_BrONO2.csv; Cross_Section_BrONO2.m	IUPAC	2016-02-24		0.85, 0.15	JPL	2016-03-04		1.04763	NaN
BrONO2 -> BrO + NO2	Jn29			JBrNO3_BrO										1.04753	NaN
CHBr3	Jn30			JCHBr3		Cross_Section_CHBr3.csv Cross_Section_CH	IUPAC	2016-02-24						1.09735	NaN
BrCl	Jn31					Cross_Section_BrCl.csv	IUPAC	2016-02-24						1.00285	NaN
Cl2	Jn32					Cross_Section_Cl2.csv;Cross_Section_Cl2.m	IUPAC	2016-02-24						0.988906	NaN
ClO	Jn33					Cross_Secton_ClO.csv	Maric And Burrows, J. Quant. Spectrosc. Radiat. Transfer (1999)	2016-02-24						3.68328	NaN
ClONO2 -> Cl + NO3	Jn34					Cross_Section_ClONO2.csv; Cross_Section_ClONO2.m	IUPAC	2016-02-24		Quantum_Yield_ClONO2_Cl.csv; Quantum_Yield_ClONO2_ClO.csv	IUPAC	2016-02-24		1.04361	NaN
ClONO2 -> ClO + NO2	Jn35													1.08522	NaN
HOCl	Jn36					Croos_Section_HOCl.csv	IUPAC	2016-02-24		1	IUPAC	2016-02-24		1.02671	NaN
