# Supplementary material for: The Framework for 0-D Atmospheric Modeling (F0AM) v3.1
Source: Copernicus journal article supplement (doi:10.5194/gmd-2016-175), 2016-07-08
Supplement: Supplementary file 4 [file gmd-2016-175-supplement.zip]

# **GEOS-Chem**

## **Chemical Mechanism**

### **Version 8-02-04**

Jingqiu Mao<sup>1</sup>, Claire Carouge<sup>1</sup>, Mat Evans<sup>2</sup>, Dylan Millet<sup>3</sup>,  
and Paul Palmer group<sup>4</sup>

<sup>1</sup>Harvard University, Cambridge, MA, USA

<sup>2</sup>University of Leeds, Leeds, UK

<sup>3</sup>University of Minnesota, St. Paul, MN, USA

<sup>4</sup>University of Edinburgh, Edinburgh, UK

Oct 27, 2009

Updates in v8-02-04:

1. Change the branch ratio of HNO<sub>4</sub> photolysis in ratj.d

Line 13 HNO<sub>4</sub>+hv->OH+NO<sub>3</sub> from 33.3 to 5.0

Line 14 HNO<sub>4</sub>+hv->HO<sub>2</sub>+NO<sub>2</sub> from 66.7 to 95.0

This is based on Jimenez et al. (Quantum yields of OH, HO<sub>2</sub> and NO<sub>3</sub> in the UV photolysis of HO<sub>2</sub>NO<sub>2</sub>, PHYSICAL CHEMISTRY CHEMICAL PHYSICS, 2005), which shows that HO<sub>2</sub> yield should be 0.95 and OH yield should be 0.05 for wavelength above 290nm.

This way all the near-IR photolysis will have most weight on HO<sub>2</sub> channel (Stark et al., Overtone dissociation of peroxyntic acid (HO<sub>2</sub>NO<sub>2</sub>): Absorption cross sections and photolysis products, JOURNAL OF PHYSICAL CHEMISTRY A, 2008).

2. Comment out the near-IR calculation of HNO<sub>4</sub> photolysis in calcrate.f since FastJX already takes this into account.

| No. | Reaction                             | Rate Constant                                                | Reference        | Notes                                                                                              |
|-----|--------------------------------------|--------------------------------------------------------------|------------------|----------------------------------------------------------------------------------------------------|
| 1   | NO + O3 → NO2 + O2                   | 3.00E-12 exp(-1500/T)                                        | JPL00            |                                                                                                    |
|     |                                      | Same                                                         | JPL06            |                                                                                                    |
| 2   | O3+OH = HO2+O2                       | 1.70E-12 exp(-940/T)                                         | JPL02            |                                                                                                    |
|     |                                      | Same                                                         | JPL06            |                                                                                                    |
| 3   | O3+HO2 = OH+2O2                      | 1.00E-14 exp(-490/T)                                         | JPL02            |                                                                                                    |
|     |                                      | Same                                                         | JPL06            |                                                                                                    |
| 4   | O3+NO2 = O2+NO3                      | 1.20E-13 exp(-2450/T)                                        | JPL97            |                                                                                                    |
|     |                                      | Same                                                         | JPL06            |                                                                                                    |
| 5   | O3+MO2 = CH2O+HO2+2O2                | 2.90E-16 exp(-1000/T)                                        | JPL02            |                                                                                                    |
|     |                                      | Same                                                         | JPL06            |                                                                                                    |
| 6   | OH+OH = H2O+O3                       | <del>4.20E-12 exp(-240/T)</del>                              | <del>JPL97</del> |                                                                                                    |
|     |                                      | 1.8E-12                                                      | JPL06            | JMAO                                                                                               |
| 7   | OH+OH+M = H2O2                       | LPL: 6.9E-31(300/T)                                          | JPL02            |                                                                                                    |
|     |                                      | HPL: 2.60E-11                                                |                  |                                                                                                    |
|     |                                      | Fc:0.6                                                       |                  |                                                                                                    |
|     |                                      | Same                                                         | JPL06            |                                                                                                    |
| 8   | OH+HO2 = H2O + O2                    | 4.80E-11 exp (250/T)                                         | JPL97            |                                                                                                    |
|     |                                      | Same                                                         | JPL06            |                                                                                                    |
| 9   | OH+H2O2 = H2O + HO2                  | <del>2.90E-12 exp(-160/T)</del>                              | <del>JPL97</del> |                                                                                                    |
|     |                                      | 1.8E-12                                                      | JPL06            | JMAO                                                                                               |
| 10  | HO2+NO = OH + NO2                    | 3.50E-12 exp(250/T)                                          | JPL97            |                                                                                                    |
|     |                                      | Same                                                         | JPL06            |                                                                                                    |
| 11  | HO2+HO2 = H2O2                       | <del>K1=2.30E-13 exp(600/T)</del>                            | <del>JPL97</del> |                                                                                                    |
|     | HO2+HO2+M=H2O2                       | <del>K2=1.70E-33 [M]</del>                                   |                  |                                                                                                    |
|     |                                      | <del>exp(1000/T)</del>                                       |                  |                                                                                                    |
|     |                                      | <del>K = (K1 + K2)*(1+1.4E-</del>                            |                  |                                                                                                    |
|     |                                      | <del>21*[H2O]*EXP(2200/T))</del>                             |                  |                                                                                                    |
|     |                                      | K1=3.50E-13 exp(430/T)                                       | JPL06            | JMAO                                                                                               |
|     |                                      | K2=1.70E-33 [M]exp(1000/T)                                   |                  |                                                                                                    |
|     |                                      | K = (K1 + K2)*(1+1.4E-                                       |                  |                                                                                                    |
|     |                                      | 21*[H2O]*EXP(2200/T)                                         |                  |                                                                                                    |
| 12  | OH+H2 = H2O + HO2                    | <del>5.50E-12 exp(-2000/T)</del>                             | <del>JPL97</del> |                                                                                                    |
|     |                                      | 2.80E-12 exp(-1800/T)                                        | JPL06            | JMAO                                                                                               |
| 13  | CO+OH = HO2 + CO2                    | <del>K0=1.50E-13</del>                                       | <del>JPL97</del> |                                                                                                    |
|     |                                      | <del>K = K0(1+0.6 Patm)</del>                                |                  |                                                                                                    |
|     | CO+OH = HOCO                         | LPL: 5.9E-33(300/T)^1.4<br>HPL:1.1E-12(300/T)^-1.3 Fc:0.6    | JPL06            | JMAO(in calcrate.f)<br>Ignore the<br>intermediate species<br>HOCO and use two 3-<br>body reactions |
|     | HOCO + O2= HO2 + CO2                 | 2.00E-12                                                     |                  |                                                                                                    |
|     | CO+OH=HO2+CO2 (different<br>formula) | LPL: 1.5E-13(300/T)^-0.6<br>HPL:2.10E9(300/T)^-6.1<br>Fc:0.6 | JPL06            |                                                                                                    |

|    |                        |                                                                       |                                        |                                                                                                    |
|----|------------------------|-----------------------------------------------------------------------|----------------------------------------|----------------------------------------------------------------------------------------------------|
| 14 | OH+ CH4 = MO2+H2O      | <del>1.26E-12 (300/T)^(6.7E-01) exp(-1575/T)</del>                    | JPL97                                  | This reaction coefficient was not found on JPL97.                                                  |
|    |                        | 2.45E-12exp(-1775/T)                                                  | JPL06                                  | JMAO:could also be 2.8E-14T^0.667 exp(-1575/T)                                                     |
| 15 | MO2+NO =CH2O+HO2+NO2   | 2.80E-12 exp(300/T)                                                   | Tyndall 2001                           | Tyndall et al., Atmospheric Chemistry of small organic peroxy radicals,JGR 106, 12157-12182, 2001. |
|    |                        | Same                                                                  | JPL06                                  |                                                                                                    |
| 16 | MO2+HO2 = MP+O2        | <del>K1=4.10E-13 exp(750/T) K2=2.00E-03exp(1160/T) K=K1/(1+K2)</del>  | <del>Tyndall-2001&amp;Elrod 2001</del> |                                                                                                    |
|    |                        | 4.1E-13 exp(750/T)                                                    | JPL06                                  | JMAO                                                                                               |
| 17 | MO2+HO2 = CH2O + O2    | <del>K1=4.10E-13 exp(750/T) K2=4.98E+2 exp(-1160/T) K=K1/(1+K2)</del> | <del>Tyndall-2001&amp;Elrod 2001</del> |                                                                                                    |
|    |                        | Not recommended in JPL06                                              | JPL06(P1-59,D35)                       | JMAO                                                                                               |
| 18 | MO2+MO2 =MOH+CH2O+O2   | K1=9.5E-14 exp(390/T)                                                 | Tyndall 2001                           | This reaction coefficient was not found on Tyndall.                                                |
|    |                        | K2=2.62E+1 exp(-1130/T)                                               |                                        |                                                                                                    |
|    |                        | Same                                                                  |                                        |                                                                                                    |
| 19 | MO2+MO2 = 2CH2O + 2HO2 | K1=9.5E-14 exp(390/T)                                                 | Tyndall 2001                           | This reaction coefficient was not found on Tyndall.                                                |
|    |                        | K2=4.00E-02                                                           |                                        |                                                                                                    |
|    |                        | exp(1130/T)                                                           |                                        |                                                                                                    |
|    |                        | K=K1 / (1+K2)                                                         |                                        |                                                                                                    |
|    |                        | Same                                                                  |                                        |                                                                                                    |
| 20 | MP+OH = MO2+H2O        | 2.66E-12 exp(200/T)                                                   | JPL97                                  |                                                                                                    |
|    |                        | Same                                                                  | JPL06                                  |                                                                                                    |
| 21 | MP+OH = CH2O+OH+H2O    | 1.14E-12 exp(200/T)                                                   | JPL97                                  |                                                                                                    |
|    |                        | Same                                                                  | JPL06                                  |                                                                                                    |
| 22 | CH2O+OH = CO+HO2+H2O   | <del>9.00E-12</del>                                                   | <del>JPL02</del>                       |                                                                                                    |
|    | CH2O+OH = HCO +H2O     | 5.5E-12 exp(125/T)                                                    | JPL06                                  | JMAO(use the first rate)                                                                           |
|    | HCO + O2 = CO + HO2    | 5.2E-12                                                               | JPL06                                  |                                                                                                    |
| 23 | NO2+OH+M = HNO3+M      | <del>LPL: 2.00E-30(300/T)^3 HPL:2.50E-11(300/T)^0 Fc: 0.6</del>       | <del>JPL02</del>                       |                                                                                                    |
|    | OH + NO2 + M = HONO2   | LPL: 1.80E-30(300/T)^3<br>HPL:2.80E-11(300/T)^0<br>Fc:0.6             | JPL06                                  | JMAO: Ignore the HOONO channel for now.                                                            |

|    |                      |                                                                                             |                                                       |                                                                                              |
|----|----------------------|---------------------------------------------------------------------------------------------|-------------------------------------------------------|----------------------------------------------------------------------------------------------|
|    | OH + NO2 + M=HOONO   | LPL:9.10E-32(300/T)^3.9<br>HPL:4.20E-11(300/T)^0.5 Fc:0.6                                   | JPL06                                                 | This adds a new species HOONO, should we include this reaction?                              |
| 24 | HNO3+OH = H2O+NO3    | K0=2.41E-14 exp(460/T)<br>K2=2.69E-17exp(2199/T)<br>K3=6.51E-34exp(1335/T)                  | Brown 98                                              | OH + HNO3: K = K0 + K3[M] / (1 + K3[M]/K2)                                                   |
|    |                      | Same                                                                                        | JPL06,same source                                     | Brown, S. S., R. K. Talukdar and A. R. Ravishankara, 1999, J. Phys. Chem. A, 103, 3031-3037. |
| 25 | NO+OH+M = HNO2+M     | LPL: 7.00E-31(300/T)^2.6<br>HPL: 3.60E-11(300/T)^0.1<br>Fc: 0.6                             | JPL97                                                 |                                                                                              |
|    |                      | LPL: 7.00E-31(300/T)^2.6<br>HPL: 3.60E-11(300/T)^0.1<br>Fc: 0.6                             | JPL06                                                 |                                                                                              |
| 26 | HNO2+OH = H2O+NO2    | 1.80E-11 exp(-390/T)<br>Same                                                                | JPL97<br>JPL06                                        |                                                                                              |
| 27 | HO2+NO2+M = HNO4+M   | LPL: 1.80E-31(300/T)^3.2;-<br>HPL:4.7E-12(300/T)^1.4; Fc= 0.6                               | JPL97                                                 |                                                                                              |
|    |                      | LPL: 2.0E-31(300/T)^3.4<br>HPL:2.9E-12(300/T)^1.1<br>Fc= 0.6                                | JPL06                                                 | JMAO                                                                                         |
| 28 | HNO4+M = HO2+NO2     | LPL: 8.64E-5(300/T)^3.2* exp(-10900/T);-<br>HPL:2.24E+15*(300/T)^1.4*exp(-10900/T); Fc=0.6  | K=forward rxn/Keq<br>Keq=2.1E-27exp(10900/T)<br>JPL97 |                                                                                              |
|    |                      | LPL: 9.52E-5(300/T)^3.2* exp(-10900/T)<br>HPL:1.38E+15*(300/T)^1.4*exp(-10900/T);<br>Fc=0.6 | K=forward rxn/Keq<br>Keq=2.1E-27exp(10900/T)<br>JPL06 | JMAO                                                                                         |
| 29 | HNO4+OH = H2O+NO2+O2 | 1.30E-12 exp(380/T)<br>Same                                                                 | JPL97<br>JPL06                                        |                                                                                              |
| 30 | NO+NO3=2NO2          | 1.50E-11 exp(170/T)<br>Same                                                                 | JPL97<br>JPL06                                        |                                                                                              |
| 31 | HO2+NO3 = OH+NO2+O2  | 3.50E-12<br>Same                                                                            | JPL06                                                 |                                                                                              |
| 32 | OH+NO3 = HO2+NO2     | 2.20E-11<br>Same                                                                            | JPL97<br>JPL06                                        |                                                                                              |
| 33 | NO2+NO3+M = N2O5+M   | LPL: 2.0E-30(300/T)^4.4;<br>HPL:1.4E-12(300/T)^0.7; Fc=0.6                                  | JPL00                                                 |                                                                                              |

|    |                                                            |                                                                                            |                                                            |                                                                                                  |
|----|------------------------------------------------------------|--------------------------------------------------------------------------------------------|------------------------------------------------------------|--------------------------------------------------------------------------------------------------|
|    |                                                            | Same                                                                                       | JPL06                                                      |                                                                                                  |
| 34 | N2O5+M = NO2+NO3                                           | LPL: 6.67E-4(300/T)^4.4* exp(-10990/T);<br>HPL: 4.67E+14*(300/T)^0.7*exp(-10990/T); Fc=0.6 | K=forwardrxn/<br>Keq; Keq = 3.00E-27exp(10990/T);<br>JPL00 |                                                                                                  |
|    |                                                            | LPL: 7.4E-4(300/T)^4.4* exp(-11000/T);<br>HPL: 5.18E+14*(300/T)^0.7*exp(-11000/T); Fc=0.6  | K=forwardrxn/<br>Keq; Keq = 2.70E-27exp(11000/T);<br>JPL06 | JMAO                                                                                             |
| 35 | HCOOH+OH<br>=H2O+CO2+HO2                                   | 4.00E-13                                                                                   | JPL97                                                      |                                                                                                  |
|    |                                                            | Same                                                                                       | JPL06                                                      |                                                                                                  |
| 36 | MOH+OH = HO2+CH2O                                          | <del>7.30E-12 exp(-620/T)</del>                                                            | <del>JPL02</del>                                           |                                                                                                  |
|    |                                                            | 2.9E-12 exp(-345/T)                                                                        | JPL06                                                      |                                                                                                  |
| 37 | NO2+NO3 = NO+NO2+O2                                        | 4.50E-14 exp(-1260/T)                                                                      | JPL97                                                      |                                                                                                  |
|    |                                                            | Same                                                                                       | JPL06                                                      |                                                                                                  |
| 38 | NO3+CH2O =<br>HNO3+HO2+CO                                  | 5.80E-16                                                                                   | JPL97                                                      |                                                                                                  |
|    |                                                            | Same                                                                                       | JPL06                                                      |                                                                                                  |
| 39 | <del>ALD2+OH = MCO3+H2O</del>                              | <del>5.60E-12 exp(270/T)</del>                                                             | <del>JPL97</del>                                           |                                                                                                  |
|    |                                                            | Same                                                                                       |                                                            | JMAO:Can not find this reaction from JPL06, it was in JPL02. It is 4.4 E-12exp(365/T) in IUPAC06 |
|    | ALD2 + OH=H2O + 0.95 MCO3 + 0.05 CH2O + 0.05 CO + 0.05 HO2 | 4.4 E-12exp(365/T)                                                                         | IUPAC06                                                    | DBM                                                                                              |
| 40 | ALD2+NO3 = HNO3+MCO3                                       | <del>1.40E-12 exp(-1860/T)</del>                                                           | <del>IUPAC02</del>                                         |                                                                                                  |
|    |                                                            | 1.40E-12 exp(-1900/T)                                                                      | JPL06                                                      | JMAO                                                                                             |
| 41 | MCO3+NO2+M = PAN                                           | LPL: 8.50E-29(300/T)^6.5;<br>HPL: 1.10E-11(300/T); Fc: 0.6                                 | Tyndall                                                    |                                                                                                  |
|    |                                                            | LPL: 9.70E-29(300/T)^5.6;<br>HPL: 9.3E-12(300/T)^1.5; Fc: 0.6                              | JPL06                                                      | JMAO                                                                                             |
| 42 | PAN = MCO3+NO2                                             | 9.30E-29 exp(14000/T)                                                                      | Tyndall                                                    |                                                                                                  |
|    |                                                            |                                                                                            | IUPAC06                                                    |                                                                                                  |
| 43 | MCO3+NO = MO2+NO2+CO2                                      | 8.10E-12 exp(270/T)                                                                        | Tyndall                                                    |                                                                                                  |
|    |                                                            | Same                                                                                       | JPL06                                                      |                                                                                                  |
| 44 | C2H6+OH = ETO2+H2O                                         | 8.7E-12 exp(-1070/T)                                                                       | JPL97                                                      |                                                                                                  |
|    |                                                            | Same                                                                                       | JPL06                                                      |                                                                                                  |
| 45 | ETO2+NO =ALD2+NO2+HO2                                      | <del>2.70E-12 exp(350/T)</del>                                                             | <del>Tyndall</del>                                         |                                                                                                  |
|    |                                                            | 2.60E-12 exp(365/T)                                                                        | JPL06                                                      | JMAO                                                                                             |

|    |                                                                                                           |                                                                                     |                 |                                        |
|----|-----------------------------------------------------------------------------------------------------------|-------------------------------------------------------------------------------------|-----------------|----------------------------------------|
| 46 | C3H8+OH = B3O2                                                                                            | $K1=7.60e-12 \exp(-585/T);$<br>$K2=5.87*(300/T)^{0.64}\exp(-816/T); K=K1 / (1+K2)$  | IUPAC02         |                                        |
|    | C3H8+OH = A3O2                                                                                            | $K1=7.60E-12 \exp(-585/T); K2=0.17*(300/T)^{-0.64}\exp(816/T);$<br>$K=K1 / (1+K2)$  | IUPAC02         | Cant find from Tyndall                 |
|    |                                                                                                           |                                                                                     | IUPAC06         | JMAO                                   |
| 47 | A3O2+NO = NO2 + HO2 + RCHO                                                                                | <del>2.70E-12 exp(350/T)</del>                                                      | Tyndall         | The products is not from Tyndall       |
|    |                                                                                                           | 2.90E-12 exp(350/T)                                                                 | IUPAC06         | JMAO                                   |
| 48 | PO2+NO = NO2+HO2+CH2O+ALD2                                                                                | 2.70E-12 exp(350/T)                                                                 | Tyndall         |                                        |
|    |                                                                                                           |                                                                                     |                 |                                        |
| 49 | ALK4+OH = R4O2                                                                                            | 9.10E-12 exp(-405/T)                                                                | IUPAC02         |                                        |
|    |                                                                                                           | Same                                                                                | IUPAC06         |                                        |
| 50 | R4O2+NO = NO2 +0.32ACET + 0.19MEK +0.18MO2 + 0.27HO2 +0.32ALD2 + 0.13RCHO +0.50A3O2 + 0.18B3O2 + 0.32ETO2 | K* (1-YN) where YN is returned from fyrno3.f; K=2.7E-12 exp(350/T) (Xcarbn=4.50E00) | Atkinson 97     |                                        |
|    |                                                                                                           |                                                                                     |                 | A3O2 is 0.05 in the input file(Palmer) |
| 51 | R4O2+NO = R4N2                                                                                            | K* YN where YN is returned from fyrno3.f K=2.7E-12 exp(350/T) (Xcarbn=4.50E00)      | Atkinson97      |                                        |
|    |                                                                                                           |                                                                                     |                 |                                        |
|    |                                                                                                           |                                                                                     |                 |                                        |
|    |                                                                                                           |                                                                                     |                 |                                        |
| 52 | ATO2+NO = 0.96NO2 + 0.960CH2O +0.960MCO3 + 0.04R4N2                                                       | 2.80E-12 exp(300/T)                                                                 | Tyndall         |                                        |
|    |                                                                                                           |                                                                                     |                 |                                        |
| 53 | KO2+NO = 0.93NO2+0.93NO + 0.93ALD2 +0.93MCO3 + 0.07R4N2                                                   | 2.70E-12 exp(350/T)                                                                 | Tyndall ETO2+NO |                                        |
|    |                                                                                                           |                                                                                     |                 |                                        |
| 54 | <del>RIO2+NO = NO2+0.864HO2+0.690CH2O+ 0.402MVK+0.288MACR+0.136RIO1+0.127IALD</del>                       | K* (1-YN) where YN is returned from fyrno3.f K=2.7E-12 exp(350/T) (Xcarbn=5.00E00)  | Atkinson 97     |                                        |
|    | RIO2 + NO = 0.90NO2 + 0.90HO2 + 0.34IALD + 0.34MVK + 0.22MACR + 0.56CH2O                                  |                                                                                     |                 | DBM(MCM 3.1)                           |
|    |                                                                                                           |                                                                                     |                 |                                        |

|    |                                                                                                                                                                                                                  |                                                                                                                       |                              |                                       |
|----|------------------------------------------------------------------------------------------------------------------------------------------------------------------------------------------------------------------|-----------------------------------------------------------------------------------------------------------------------|------------------------------|---------------------------------------|
| 55 | $\text{RIO}_2 + \text{NO} = \text{HNO}_3$                                                                                                                                                                        | $K^* \text{ YN}$ where YN is returned from<br>fyrno3.f $K=2.7\text{E-}12 \exp(350/\text{T})$<br>(Xcarbn=5.00E00)      | Atkinson 97                  |                                       |
| 56 | $\text{IAO}_2 + \text{NO} =$<br>$0.92\text{HO}_2 + 0.61\text{CO} + 0.17\text{H}_2 + 0.33\text{HAC} + 0.24\text{GLYC}$<br>$+ 0.53\text{MGLY} + 0.92\text{NO}_2$<br>$+ 0.35\text{CH}_2\text{O} + 0.08\text{HNO}_3$ | $2.7\text{E-}12 \exp(350/\text{T})$                                                                                   | Tyndall ETO <sub>2</sub> +NO |                                       |
| 57 | <del><math>\text{ISN}_1 + \text{NO} =</math><br/><math>1.9\text{NO}_2 + 0.95\text{GLYC} + 0.95\text{HAC}</math><br/><math>+ 0.05\text{HNO}_3 + 0.05\text{NO}_2</math></del>                                      | $2.7\text{E-}12 \exp(350/\text{T})$                                                                                   | Tyndall ETO <sub>2</sub> +NO |                                       |
|    | $\text{ISN}_1 + \text{NO} =$<br>$1.9\text{NO}_2 + 0.95\text{GLYC} + 0.95\text{HAC}$<br>$+ 0.05\text{HNO}_3 + 0.05\text{NO}_2 + 0.05\text{HO}_2$                                                                  |                                                                                                                       | Paulson&Seinfeld<br>1992     | HO <sub>2</sub> term(Palmer,<br>JMAO) |
| 58 | $\text{VRO}_2 + \text{NO} =$<br>$\text{NO}_2 + 0.28\text{HO}_2 + 0.28\text{CH}_2\text{O} + 0.72\text{MCO}_3 + 0.72\text{GLYC} + 0.28\text{MGLY}$                                                                 | $K^* (1-\text{YN})$ where YN is returned<br>from fyrno3.f $K=2.7\text{E-}12$<br>$\exp(350/\text{T})$ (Xcarbn=4.00E00) | Atkinson 97                  |                                       |
| 59 | $\text{VRO}_2 + \text{NO} = \text{HNO}_3$                                                                                                                                                                        | $K^* \text{ YN}$ where YN is returned from<br>fyrno3.f $K=2.7\text{E-}12 \exp(350/\text{T})$<br>(Xcarbn=4.00E00)      | Atkinson 97                  |                                       |
| 60 | <del><math>\text{MRO}_2 + \text{NO} = \text{NO}_2 + \text{HO}_2</math><br/><math>+ 0.17\text{MGLY} + 0.83\text{HAC}</math><br/><math>+ 0.83\text{CO} + 0.17\text{CH}_2\text{O}</math></del>                      | $K^* (1-\text{YN})$ where YN is returned<br>from fyrno3.f $K=2.7\text{E-}12$<br>$\exp(350/\text{T})$ (Xcarbn=4.00E00) | Atkinson 97                  |                                       |
|    | $\text{MRO}_2 + \text{NO} = \text{NO}_2 + \text{HAC} +$<br>$\text{CH}_2\text{O} + \text{HO}_2$                                                                                                                   |                                                                                                                       |                              | DBM(MCM 3.1)                          |
| 61 | $\text{MRO}_2 + \text{NO} = \text{HNO}_3$                                                                                                                                                                        | $K^* \text{ YN}$ where YN is returned from<br>fyrno3.f $K=2.7\text{E-}12 \exp(350/\text{T})$<br>(Xcarbn=4.00E00)      | Atkinson 97                  |                                       |
| 62 | $\text{MVN}_2 + \text{NO} = 1.90\text{NO}_2$<br>$+ 0.30\text{HO}_2 + 0.30\text{CH}_2\text{O} + 0.60\text{MCO}_3 + 0.60\text{GLYC} + 0.30\text{MGLY} + 0.10\text{HNO}_3$                                          | $2.7\text{E-}12 \exp(350/\text{T})$                                                                                   |                              |                                       |
| 63 | $\text{MAN}_2 + \text{NO} =$<br>$2\text{NO}_2 + \text{CH}_2\text{O} + \text{MGLY}$                                                                                                                               | $2.7\text{E-}12 \exp(350/\text{T})$                                                                                   | Tyndall ETO <sub>2</sub> +NO |                                       |
| 64 | $\text{B}_3\text{O}_2 + \text{NO} = \text{NO}_2 + \text{HO}_2 + \text{ACET}$                                                                                                                                     | $2.7\text{E-}12 \exp(350/\text{T})$                                                                                   |                              |                                       |

|    |                                                                                 |                                                                |                                    |                                    |
|----|---------------------------------------------------------------------------------|----------------------------------------------------------------|------------------------------------|------------------------------------|
| 65 | INO2+NO =<br>1.10NO2+0.80HO2+0.85HNO<br>3+0.05NO2+0.10MACR+0.15<br>CH2O+0.05MVK | 2.7E-12 exp(350/T)                                             | Tyndall ETO2+NO                    |                                    |
| 66 | PRN1+NO =<br>2NO2+CH2O+ALD2                                                     | 2.7E-12 exp(350/T)                                             | Tyndall ETO2+NO                    |                                    |
| 67 | ALK4+NO3 = HNO3 + R4O2                                                          | 2.8E-12 exp(-3280/T)                                           | IUPAC02                            |                                    |
|    |                                                                                 | Same                                                           | IUPAC06                            | ? Can't find                       |
| 68 | R4N2+OH = R4N1+H2O                                                              | <del>1.30E-12</del>                                            | <del>Atkinson 92-</del>            | HO + 1-C4H9ONO2 →<br>products      |
|    |                                                                                 | 1.6E-12                                                        | IUPAC06                            | JMAO                               |
| 69 | ACTA+OH =<br>MO2+CO2++H2O                                                       | <del>4.00E-13 exp(200/T)</del>                                 | <del>DeMore et al.,<br/>1994</del> |                                    |
|    |                                                                                 | 4.20E-14 exp(855/T)                                            | IUPAC06                            | JMAO                               |
| 70 | OH+RCHO= RCO3+H2O                                                               | <del>5.10E-12 exp(405/T)</del>                                 | <del>IUPAC02</del>                 | HO +<br>CH3CH2CH2CHO →<br>products |
|    |                                                                                 | 6.0E-12exp(410/T)                                              | IUPAC06                            | JMAO                               |
| 71 | RCO3+NO2 = PPN                                                                  | LPL: 9.00E-28(300/T)^8.9<br>HPL:7.70E-12(300/T)^0.2 Fc:<br>0.6 | JPL02                              |                                    |
|    |                                                                                 | Same                                                           | JPL06                              |                                    |
| 72 | PPN = RCO3+NO2                                                                  | 9e-29*exp(14000/T)                                             | JPL02                              |                                    |
|    |                                                                                 | Same                                                           | JPL06                              |                                    |
| 73 | MAO3+NO2 = PMN                                                                  | LPL: 9.00E-28(300/T)^8.9<br>HPL:7.70E-12(300/T)^0.2 Fc:<br>0.6 | JPL02 Same                         |                                    |
|    |                                                                                 | Same                                                           | as PPN                             |                                    |
| 74 | PMN = MAO3+NO2                                                                  | 9e-29*exp(14000/T)                                             | JPL02                              |                                    |
|    |                                                                                 | Same                                                           |                                    |                                    |
| 75 | GLCO3+NO2 = GLPAN                                                               | LPL: 9.00E-28(300/T)^8.9<br>HPL:7.70E-12(300/T)^0.2 Fc:<br>0.6 | JPL02 Same as<br>PPN               | Should be same as<br>RCO3???       |
| 76 | GLPAN = GLCO3+NO2                                                               | 9e-29*exp(14000/T)                                             | JPL02 PPN                          |                                    |
| 77 | GCO3+NO2 = GPAN                                                                 | LPL: 9.00E-28(300/T)^8.9<br>HPL:7.70E-12(300/T)^0.2 Fc:<br>0.6 | JPL02 Same as<br>PPN               |                                    |
| 78 | GPAN = GCO3+NO2N                                                                | 9e-29*exp(14000/T)                                             | JPL02 PPN                          |                                    |
| 79 | RCO3+NO = NO2+ETO2                                                              | 6.70E-12 exp(340/T)                                            | IUPAC02<br>C2H5CO3+NO              |                                    |
|    |                                                                                 | Same                                                           | IUPAC06                            |                                    |
| 80 | GCO3+NO = NO2+HO2<br>+CH2O                                                      | 6.70E-12 exp(340/T)                                            | IUPAC02<br>C2H5CO3+NO              |                                    |
|    |                                                                                 | Same                                                           | IUPAC06                            |                                    |

|    |                                                                                  |                                 |                                                 |                                                                                                                   |
|----|----------------------------------------------------------------------------------|---------------------------------|-------------------------------------------------|-------------------------------------------------------------------------------------------------------------------|
| 81 | GLCO3+NO = NO2+HO2+CO                                                            | 6.70E-12 exp(340/T)             | IUPAC02<br>C2H5CO3+NO                           |                                                                                                                   |
|    |                                                                                  | Same                            | IUPAC06                                         |                                                                                                                   |
| 82 | RCHO+NO3 = HNO3 +RCO3                                                            | <del>1.82E-12exp(-1680/T)</del> | <del>IUPAC02 Mean of</del>                      |                                                                                                                   |
|    |                                                                                  |                                 | <del>CH3CHO+NO3 and</del>                       |                                                                                                                   |
|    |                                                                                  |                                 | <del>C3H7CH+NO3</del>                           |                                                                                                                   |
|    |                                                                                  | 6.5E-15                         | IUPAC06                                         | NO3+C2H5CHO →<br>HNO3 + C2H5CO                                                                                    |
| 83 | ACET+OH = ATO2 + H2O                                                             | 1.33E-13+ 3.82E-11 exp(-2000/T) | JPL 02<br>Implemented as 2<br>reactions         |                                                                                                                   |
|    |                                                                                  | Same                            | JPL06                                           | JMAO                                                                                                              |
| 84 | A3O2+MO2 = HO2<br>+0.75CH2O+0.75RCHO+0.25<br>MOH + 0.25ROH                       | 5.92E-13                        | Tyndall<br>RateMO2+MO2<br>Atkinson97RO2+R<br>O2 | K(RO2+MO2) =<br>2*sqrt(k(MO2+MO2)*k(<br>RO2+RO2)).                                                                |
| 85 | PO2+MO2 = HO2 +<br>0.5ALD2+1.25CH2O<br>+0.16HAC + 0.09RCHO<br>+0.25MOH + 0.25ROH | 5.92E-13                        | Tyndall<br>RateMO2+MO2<br>Atkinson97RO2+R<br>O2 |                                                                                                                   |
|    |                                                                                  |                                 |                                                 |                                                                                                                   |
| 86 | R4O2+HO2 = R4P                                                                   | 7.40E-13 exp(700/T)             | Tyndall                                         |                                                                                                                   |
|    |                                                                                  |                                 | ETO2+HO2                                        |                                                                                                                   |
|    |                                                                                  |                                 |                                                 |                                                                                                                   |
| 87 | R4N1+HO2 = R4N2                                                                  | 7.40E-13 exp(700/T)             | Tyndall                                         |                                                                                                                   |
|    |                                                                                  |                                 | ETO2+HO2                                        |                                                                                                                   |
|    |                                                                                  |                                 |                                                 |                                                                                                                   |
| 88 | ATO2+HO2 = MCO3 + MO2                                                            | 8.60E-13 exp(700/T)             |                                                 |                                                                                                                   |
|    |                                                                                  |                                 |                                                 |                                                                                                                   |
| 89 | KO2+HO2 = MO2 + MGLY                                                             | 7.40E-13 exp(700/T)             | Tyndall                                         | Tyndall forms<br>CH3C(O)CH2OOH ,this<br>must then split and go<br>to MCO3+MO2, the<br>products in chem..dat<br>?? |
|    |                                                                                  |                                 | ETO2+HO2                                        |                                                                                                                   |
| 90 | RIO2+HO2 = RIP                                                                   | 7.40E-13 exp(700/T)             | Tyndall                                         |                                                                                                                   |
|    |                                                                                  |                                 | ETO2+HO2                                        |                                                                                                                   |
| 91 | RIO1+HO2 = RIP                                                                   | 7.40E-13 exp(700/T)             | Tyndall                                         |                                                                                                                   |
|    |                                                                                  |                                 | ETO2+HO2                                        |                                                                                                                   |
| 92 | IAO2 + HO2 = IAP                                                                 | 7.40E-13 exp(700/T)             | Tyndall                                         |                                                                                                                   |
|    |                                                                                  |                                 | ETO2+HO2                                        |                                                                                                                   |
| 93 | ISN1+HO2 = ISNP                                                                  | 7.40E-13 exp(700/T)             | Tyndall                                         |                                                                                                                   |
|    |                                                                                  |                                 | ETO2+HO2                                        |                                                                                                                   |
| 94 | VRO2+HO2 = VRP                                                                   | 7.40E-13 exp(700/T)             | Tyndall                                         |                                                                                                                   |
|    |                                                                                  |                                 | ETO2+HO2                                        |                                                                                                                   |
| 95 | MRO2+HO2 = MRP                                                                   | 7.40E-13 exp(700/T)             | Tyndall                                         |                                                                                                                   |
|    |                                                                                  |                                 | ETO2+HO2                                        |                                                                                                                   |

|     |                                                                                                                                                          |                                                   |                                                                 |      |
|-----|----------------------------------------------------------------------------------------------------------------------------------------------------------|---------------------------------------------------|-----------------------------------------------------------------|------|
| 96  | MVN2 + HO2 = ISNP                                                                                                                                        | 7.40E-13 exp(700/T)                               | Tyndall                                                         |      |
|     |                                                                                                                                                          |                                                   | ETO2+HO2                                                        |      |
| 97  | MAN2 + HO2 = ISNP                                                                                                                                        | 7.40E-13 exp(700/T)                               | Tyndall                                                         |      |
|     |                                                                                                                                                          |                                                   | ETO2+HO2                                                        |      |
| 98  | B3O2+HO2 = RB3P                                                                                                                                          | 7.40E-13 exp(700/T)                               | Tyndall                                                         |      |
|     |                                                                                                                                                          |                                                   | ETO2+HO2                                                        |      |
| 99  | INO2 + HO2 = INPN                                                                                                                                        | 7.40E-13 exp(700/T)                               | Tyndall                                                         |      |
|     |                                                                                                                                                          |                                                   | ETO2+HO2                                                        |      |
| 100 | PRN1 + HO2 = PRPN                                                                                                                                        | 7.40E-13 exp(700/T)                               | Tyndall                                                         |      |
|     |                                                                                                                                                          |                                                   | ETO2+HO2                                                        |      |
| 101 | MEK+OH = KO2+H2O                                                                                                                                         | <del>2.28E-13 * (300/T)^-2-<br/>*exp(503/T)</del> | <del>IUPAC02</del>                                              |      |
|     |                                                                                                                                                          | 1.3 E-12exp(-25/T)                                | IUPAC06                                                         | JMAO |
| 102 | MO2+ETO2 =<br>0.75CH2O+0.75ALD2+HO2+0<br>.25MOH+0.25EOH                                                                                                  | 3.00E-13                                          | Horowitz 98,<br>Atkinson 92& 94                                 |      |
|     |                                                                                                                                                          |                                                   |                                                                 |      |
| 103 | MEK+NO3 = HNO3+ KO2                                                                                                                                      | 8.00E-16                                          | Lurmann et<br>al., 1986.                                        |      |
|     |                                                                                                                                                          |                                                   |                                                                 |      |
| 104 | R4O2+MO2 =<br>0.16ACET+0.10MEK+0.09MO<br>2+0.14HO2+0.16ALD2<br>+0.07RCHO+0.03A3O2<br>+0.09B3O2+0.16ETO2+0.25M<br>EK+0.75CH2O+0.25MOH+0.2<br>5ROH+0.50HO2 | 8.37E-14                                          | Tyndall MO2+MO2<br>Atkinson97<br>RO2+RO2 (See<br>note 11 below) |      |
|     |                                                                                                                                                          |                                                   |                                                                 |      |
| 105 | R4N1+MO2 =<br>NO2+0.20CH2O+0.38ALD2 +<br>0.29RCHO+0.15R4O2+<br>0.25RCHO+0.75CH2O+0.25M<br>OH+0.25ROH+0.50HO2                                             | 8.37E-14                                          | Tyndall MO2+MO2<br>Atkinson97<br>RO2+RO2 (See<br>note 11 below) |      |
|     |                                                                                                                                                          |                                                   |                                                                 |      |
| 106 | ATO2+MO2 =<br>0.30HO2+0.30CH2O+0.30MC<br>O3+0.20HAC+0.20CH2O+0.5<br>0MGLY+0.50MOH                                                                        | 7.5E-13 exp(500/T)                                | Tyndall,2001                                                    |      |
|     |                                                                                                                                                          |                                                   |                                                                 |      |
| 107 | KO2+MO2 = 0.5ALD2<br>+0.50MCO3+0.25MEK+0.75C<br>H2O+0.25MOH+0.25ROH+0.5<br>HO2                                                                           | 8.37E-14                                          |                                                                 |      |
|     |                                                                                                                                                          |                                                   |                                                                 |      |
| 108 | <del>RIO2+MO2 = 0.42HO2<br/>+0.35CH2O+0.2MVK<br/>+0.14MACR + 0.07RIO1<br/>+0.06IALD+0.25MEK+0.75CH2<br/>O+0.25MOH+0.25ROH +<br/>0.5HO2</del>             | 8.37E-14                                          | Tyndall MO2+MO2<br>Atkinson97<br>RO2+RO2 (See<br>note 11 below) |      |

|                |                                                                                                             |                     |                                                                           |                                                                               |
|----------------|-------------------------------------------------------------------------------------------------------------|---------------------|---------------------------------------------------------------------------|-------------------------------------------------------------------------------|
|                |                                                                                                             |                     |                                                                           | HO2 term is 0.43 in input file, need to be changed back to 0.42(Palmer, JMAO) |
| 109            | RIO1+MO2 =<br>0.50IALD+0.50HO2+0.38CH2O+0.25MEK+0.75CH2O+0.25MOH+0.25ROH+ 0.5HO2                            | 8.37E-14            | Tyndall MO2+MO2<br>Atkinson97<br>RO2+RO2 (See note 11 below)              |                                                                               |
| 110            | IAO2+MO2 =<br>0.50HO2+0.33CO+0.09H2+0.18HAC+0.13GLYC+0.29MGLY+0.25MEK+0.95CH2O+0.25MOH+0.25ROH+0.5HO2       | 8.37E-14            | Tyndall MO2+MO2<br>Atkinson97<br>RO2+RO2 (See note 11 below)              |                                                                               |
| 111            | ISN1+MO2 =<br>NO2+0.50GLYC+0.50HAC+0.25RCHO+0.75CH2O+0.25MOH+ 0.25ROH+0.50HO2                               | 8.37E-14            | Tyndall MO2+MO2<br>Atkinson97<br>RO2+RO2 (See note 11 below)              |                                                                               |
| 112            | VRO2+MO2 =<br>0.14HO2+0.14CH2O+0.36MCO3+0.36GLYC+0.14MGLY+0.25MEK+0.75CH2O+0.25MOH+0.25ROH+0.50HO2          | 8.37E-14            | Tyndall MO2+MO2<br>Atkinson97<br>RO2+RO2 (See note 11 below)              |                                                                               |
| <del>113</del> | <del>MRO2+MO2 =<br/>0.50HO2+0.09MGLY+0.42HAC+0.42CO+0.09CH2O+0.25MEK+0.75CH2O+0.25MOH+0.25ROH+0.50HO2</del> | <del>8.37E-14</del> | <del>Tyndall MO2+MO2<br/>Atkinson97<br/>RO2+RO2 (See note 11 below)</del> |                                                                               |
|                | MRO2 + MO2 = HAC +<br>0.85CH2O + 1.15HO2 +<br>0.15CO                                                        |                     |                                                                           | DBM(MCM 3.1)                                                                  |
| 114            | MVN2+MO2 =<br>NO2+0.50CH2O+0.25MCO3+0.25MGLY+0.25HO2+0.25RCHO+0.75CH2O+0.25MOH+0.25ROH+0.50HO2              | 8.37E-14            | Tyndall MO2+MO2<br>Atkinson97<br>RO2+RO2 (See note 11 below)              |                                                                               |
| 115            | MAN2+MO2=<br>NO2+0.50CH2O+0.50MGLY+0.25RCHO+0.75CH2O+0.25MOH+0.25ROH+0.50HO2                                | 8.37E-14            | Tyndall MO2+MO2<br>Atkinson97<br>RO2+RO2 (See note 11 below)              |                                                                               |
|                |                                                                                                             |                     |                                                                           |                                                                               |

|     |                                                                                                                                      |                                                                    |                                                                 |                                                                                               |
|-----|--------------------------------------------------------------------------------------------------------------------------------------|--------------------------------------------------------------------|-----------------------------------------------------------------|-----------------------------------------------------------------------------------------------|
| 116 | B3O2+MO2 =<br>0.50HO2+0.50ACET+0.25AC<br>ET<br>+0.75CH2O+0.25MOH+0.25R<br>OH+0.50HO2                                                 | 8.37E-14                                                           | Tyndall MO2+MO2<br>Atkinson97<br>RO2+RO2 (See<br>note 11 below) |                                                                                               |
| 117 | INO2+MO2 =<br>0.55NO2+0.40HO2+0.425HNO<br>3+0.025NO2+0.05MACR+0.08<br>CH2O+0.03MVK+0.25RCHO+0<br>.75CH2O+0.25MOH+0.25ROH<br>+0.05HO2 | 8.37E-14                                                           | Tyndall MO2+MO2<br>Atkinson97<br>RO2+RO2 (See<br>note 11 below) |                                                                                               |
|     |                                                                                                                                      |                                                                    |                                                                 | NISOP02(in MCM),<br>HO2 term is 0.5 in the<br>input file, need to be<br>fixed. (Palmer, JMAO) |
| 118 | PRN1+MO2 =<br>NO2+0.50CH2O+<br>0.50ALD2+0.25RCHO+0.75C<br>H2O+0.25MOH+0.25ROH+0.5<br>0HO2                                            | 8.37E-14                                                           | Tyndall MO2+MO2<br>Atkinson97<br>RO2+RO2 (See<br>note 11 below) |                                                                                               |
| 119 | EOH+OH = HO2+ALD2                                                                                                                    | 6.90E-12 exp(-230/T)                                               | JPL02                                                           |                                                                                               |
| 120 | ROH+OH = HO2+RCHO                                                                                                                    | 4.6E-12 exp(70/T)                                                  | IUPAC                                                           | not in JPL06                                                                                  |
|     |                                                                                                                                      | Same                                                               | IUPAC06                                                         |                                                                                               |
| 121 | ETO2+ETO2 = 2ALD2 +2HO2                                                                                                              | 4.10E-14                                                           | JPL97                                                           |                                                                                               |
|     |                                                                                                                                      | Same                                                               | JPL06                                                           |                                                                                               |
| 122 | ETO2+ETO2 = EOH + ALD2                                                                                                               | 2.70E-14                                                           | JPL97                                                           |                                                                                               |
|     |                                                                                                                                      | Same                                                               | JPL06                                                           |                                                                                               |
| 123 | HO2+ETO2 = ETP                                                                                                                       | 7.40E-13 exp(700/T)                                                | Tyndall (see note<br>4)                                         |                                                                                               |
|     |                                                                                                                                      |                                                                    |                                                                 |                                                                                               |
|     |                                                                                                                                      |                                                                    | Not JPL 03                                                      |                                                                                               |
| 124 | A3O2+HO2 = RA3P                                                                                                                      | 7.40E-13 exp(700/T)                                                | Tyndall                                                         |                                                                                               |
|     |                                                                                                                                      |                                                                    | ETO2+HO2                                                        |                                                                                               |
|     |                                                                                                                                      |                                                                    |                                                                 |                                                                                               |
| 125 | PO2+HO2 = PP                                                                                                                         | 7.40E-13 exp(700/T)                                                | Tyndall                                                         |                                                                                               |
|     |                                                                                                                                      |                                                                    | ETO2+HO2                                                        |                                                                                               |
|     |                                                                                                                                      |                                                                    |                                                                 |                                                                                               |
| 126 | HO2+MCO3=ACTA+O3                                                                                                                     | K=K1/(1+K2); K1=4.30E-<br>13exp(1040/T) K2=3.70E+1 exp(-<br>660/T) | RateTyndall:br-<br>crawford&-<br>moortgart                      |                                                                                               |
| 127 | HO2+MCO3= MAP                                                                                                                        | K=K1/(1+K2); K1=4.30E-<br>13exp(1040/T) K2=2.70E-2-<br>exp(660/T)  | RateTyndall:br-<br>crawford&-<br>moortgart                      |                                                                                               |

|     |                                                                          |                                                               |                                      |                 |
|-----|--------------------------------------------------------------------------|---------------------------------------------------------------|--------------------------------------|-----------------|
|     | MCO3 + HO2 = 0.15 ACTA + 0.15 O3 + 0.44 OH + 0.44 MO2 + 0.41 MAP         | 5.2e-13exp(980/T)                                             | IUPAC(Feb2009)                       | DBM             |
| 128 | RCO3+HO2=0.3RCOOH+0.3 O3+ 0.7RP                                          | 4.30E-13 exp(1040/T)                                          |                                      |                 |
| 129 | <del>GCO3+HO2=0.3RCOOH+0.3O3 +0.7GP</del>                                | 4.30E-13 exp(1040/T)                                          |                                      |                 |
|     | GCO3 + HO2 = 0.71GP + 0.29O3 + 0.29CH2O                                  |                                                               |                                      | DBM(MCM 3.1)    |
| 130 | MAO3+HO2=0.3RCOOH+0.3 O3 + 0.7MAOP                                       | 4.30E-13 exp(1040/T)                                          |                                      |                 |
| 131 | GLCO3+HO2=0.3RCOOH+0.3 O3+0.7GLP                                         | 4.30E-13 exp(1040/T)                                          |                                      |                 |
| 132 | PRPE+OH+M = PO2                                                          | <del>LPL: 8.00E-27(300/T)^3.5</del>                           | <del>Atkinson-92&amp;IUPAC 03</del>  |                 |
|     |                                                                          | <del>HPL:3.00E-11</del>                                       | <del>for Fc:</del>                   |                 |
|     |                                                                          | <del>Fc: 0.5</del>                                            |                                      |                 |
|     |                                                                          | LPL: 8.00E-27(300/T)^3.5                                      | IUPAC06                              | JMAO            |
|     |                                                                          | HPL:3.00E-11(300/T)                                           |                                      |                 |
|     |                                                                          | Fc: 0.5                                                       |                                      |                 |
| 133 | PRPE+O3 = 0.535CH2O+0.500ALD2+0.42 OCO+0.300HO2+0.135OH+0.065H2+0.305MO2 | <del>6.50E-15 exp(-1880/T)</del>                              | <del>Paulson &amp; Seinfeld-92</del> |                 |
|     |                                                                          | 5.50E-15 exp(-1880/T)                                         | IUPAC06                              | JMAO            |
| 134 | GLYX+OH = HO2+2CO                                                        | <del>K1=1.10E-11</del>                                        | <del>Atkinson-92,94</del>            |                 |
|     |                                                                          | <del>K = K1*([O2]+3.5D18)/</del>                              |                                      |                 |
|     |                                                                          | <del>(2*[O2]+3.5D18)</del>                                    |                                      |                 |
|     |                                                                          | 1.1E-11                                                       | IUPAC06                              | Already updated |
| 135 | MGLY+OH = MCO3+CO                                                        | <del>1.70E-11</del>                                           | <del>Atkinson-92,94</del>            |                 |
|     |                                                                          | 1.50E-11                                                      | IUPAC06                              | JMAO            |
| 136 | GLYX+NO3 = HNO3 + HO2+ 2CO                                               | K1=1.40E-12exp(-1860/T)<br>K=K1*([O2]+3.5D18)/(2*[O2]+3.5D18) | Atkinson92&94, (ALD2)                |                 |
| 137 | MGLY+NO3 = HNO3 + CO +MCO3                                               | 1.40E-12 exp(-1860/T)                                         | Atkinson92&94, (ALD2)                |                 |
|     |                                                                          | Same                                                          | IUPAC06                              |                 |
| 138 | ISOP+OH = RIO2                                                           | 2.70E-11 exp(390/T)                                           | IUPAC02                              |                 |

|     |                                       |                                |                                                                |                                                                                                                                                                                                                                                                                                                                                                                                            |
|-----|---------------------------------------|--------------------------------|----------------------------------------------------------------|------------------------------------------------------------------------------------------------------------------------------------------------------------------------------------------------------------------------------------------------------------------------------------------------------------------------------------------------------------------------------------------------------------|
|     |                                       | Same                           | IUPAC06                                                        |                                                                                                                                                                                                                                                                                                                                                                                                            |
| 139 | MVK+OH = VRO2                         | <del>4.13E-12 exp(452/T)</del> | <del>Atkinson92,94;-<br/>Tuazon-<br/>&amp;Atkinson-89,90</del> |                                                                                                                                                                                                                                                                                                                                                                                                            |
|     |                                       | 2.6e-12exp(610/T)              | IUPAC06                                                        | JMAO                                                                                                                                                                                                                                                                                                                                                                                                       |
| 140 | MACR+OH = 0.5MAO3<br>+0.5MRO2         | <del>1.86E-11 exp(175/T)</del> | <del>Atkinson92,94;-<br/>Tuazon-<br/>&amp;Atkinson89,90</del>  |                                                                                                                                                                                                                                                                                                                                                                                                            |
|     | MACR + OH = 0.57MAO3 +<br>0.43MRO2    | 8.0E-12exp(380/T)              | IUPAC06                                                        | JMAO,DBM(MCM3.1)                                                                                                                                                                                                                                                                                                                                                                                           |
| 141 | HAC+OH = MGLY+HO2                     | 3E-12                          | Atkinson 92,94                                                 |                                                                                                                                                                                                                                                                                                                                                                                                            |
|     |                                       | Same                           | IUPAC06                                                        |                                                                                                                                                                                                                                                                                                                                                                                                            |
| 142 | MCO3+A3O2 =<br>MO2+RCHO+HO2           | 1.68E-12 exp(500/T)            | T dep &<br>B.R.Tyndall<br>K298Villenave 98<br>See note 12      |                                                                                                                                                                                                                                                                                                                                                                                                            |
| 143 | MCO3+PO2 = MO2<br>+ALD2+CH2O+HO2      | 1.68E-12 exp(500/T)            | T dep &<br>B.R.Tyndall<br>K298Villenave 98<br>See note 12      |                                                                                                                                                                                                                                                                                                                                                                                                            |
|     |                                       |                                |                                                                |                                                                                                                                                                                                                                                                                                                                                                                                            |
| 144 | MCO3+A3O2 = ACTA +RCHO                | 1.87E-13 exp(500/T)            | T dep &<br>B.R.Tyndall<br>K298Villenave 98<br>See note 12      | k 298 = 1e-11cm3<br>molec-1. Use T dep.<br>From MCO3+MO2<br>according to Tyndall,<br>and apply branching<br>ratio from Tyndall.<br>Keeping rate constant<br>at 298K equal to 1E-<br>11,means that A factor<br>is 1.87E-12. Branching<br>ratio from Tyndall<br>sends 90% to the<br>radical branch(A =<br>0.9*1.87E-12 = 1.68E-<br>12), and 10% to<br>molecular branch (A =<br>0.1* 1.87E-12 =1.87E-<br>13). |
|     |                                       |                                |                                                                |                                                                                                                                                                                                                                                                                                                                                                                                            |
| 145 | MCO3+PO2 = ACTA +<br>0.35RCHO+0.65HAC | 1.87E-13 exp(500/T)            | T dep &<br>B.R.Tyndall<br>K298Villenave 98<br>See note 12      |                                                                                                                                                                                                                                                                                                                                                                                                            |
|     |                                       |                                |                                                                |                                                                                                                                                                                                                                                                                                                                                                                                            |
|     |                                       |                                |                                                                |                                                                                                                                                                                                                                                                                                                                                                                                            |

|     |                                                                                                         |                                  |                                                           |                                                                                    |
|-----|---------------------------------------------------------------------------------------------------------|----------------------------------|-----------------------------------------------------------|------------------------------------------------------------------------------------|
| 146 | ISOP+O3 = 0.387MACR +<br>0.159MVK+0.100O3+0.270OH<br>+0.070PRPE+0.900CH2O+0.0<br>60HO2+0.150CO2+0.050CO | 1.05E-14 exp(-2000/T)            | Paulson & Seinfeld,<br>92 Aschmann<br>& Atkinson, 94      |                                                                                    |
| 147 | MVK+O3 = 0.82MGLY+<br>0.80CH2O+0.20O2+0.05CO+0<br>.06HO2+ 0.04ALD2                                      | <del>4.00E-15 exp(-2000/T)</del> | <del>Paulson &amp; Seinfeld<br/>92</del>                  |                                                                                    |
|     | 0.20O2->0.20O3(Palmer,<br>JMAO, according to Paulson &<br>Seinfeld 92)                                  | 8.5 E-16exp(-1520/T)             | IUPAC06                                                   | JMAO, 0.20O2-<br>>0.20O3(Palmer,<br>JMAO, according to<br>Paulson & Seinfeld 92)   |
| 148 | MACR+O3 = 0.800MGLY<br>+0.700CH2O+0.200O3+0.200<br>CO+0.275HO2+0.215OH+0.16<br>0CO2                     | <del>4.40E-15 exp(-2500/T)</del> | <del>Paulson &amp; Seinfeld<br/>92</del>                  |                                                                                    |
|     |                                                                                                         | 1.4 E-15exp(-2100/T)             | IUPAC06                                                   | JMAO                                                                               |
| 149 | ISOP+NO3 = INO2                                                                                         | <del>3.03E-12 exp(-446/T)</del>  | <del>Atkinson 92,94</del>                                 |                                                                                    |
|     |                                                                                                         | 3.15E-12 exp(-450/T)             | IUPAC06                                                   | JMAO                                                                               |
| 150 | MVK+NO3 = MVN2                                                                                          | <del>2.00E-14</del>              | <del>Horowitz et al.,<br/>1998,</del>                     |                                                                                    |
|     |                                                                                                         |                                  | <del>Lurmann et al.,<br/>1986</del>                       |                                                                                    |
|     |                                                                                                         | REMOVED (<6E-16,IUPAC06)         |                                                           | JMAO                                                                               |
| 151 | MACR+NO3 = MAN2                                                                                         | <del>6.70E-15</del>              | <del>Lurmann et al.,<br/>1986</del>                       |                                                                                    |
|     |                                                                                                         | 2.3E-15                          | IUPAC06                                                   | JMAO                                                                               |
| 152 | MACR+NO3 = MAO3+HNO3                                                                                    | <del>3.30E-15</del>              | <del>Lurmann et al.,<br/>1986</del>                       | IUPAC06 total rate is<br>3.4E-15, so use the<br>ratio from Lurmann et<br>al., 1986 |
|     |                                                                                                         | 1.1E-15                          | IUPAC06                                                   | JMAO                                                                               |
| 153 | RCO3+MO2 =<br>CH2O+HO2+ETO2                                                                             | 1.68E-12 exp(500/T)              | T dep &<br>B.R.Tyndall<br>K298Villenave 98<br>See note 12 |                                                                                    |
| 154 | GCO3+MO2 = 2CH2O +2HO2                                                                                  | 1.68E-12 exp(500/T)              | T dep &<br>B.R.Tyndall<br>K298Villenave 98<br>See note 12 |                                                                                    |

|     |                                                   |                     |                                                           |                            |
|-----|---------------------------------------------------|---------------------|-----------------------------------------------------------|----------------------------|
| 155 | MAO3+MO2 =<br>CH2O+HO2+CH2O+MCO3                  | 1.68E-12 exp(500/T) | T dep &<br>B.R.Tyndall<br>K298Villenave 98<br>See note 12 |                            |
| 156 | GLCO3+MO2 = CH2O<br>+2HO2+CO                      | 1.68E-12 exp(500/T) | T dep &<br>B.R.Tyndall<br>K298Villenave 98<br>See note 12 |                            |
| 157 | RCO3+MO2 = RCOOH<br>+CH2O                         | 1.87E-13 exp(500/T) | T dep &<br>B.R.Tyndall<br>K298Villenave 98<br>See note 12 |                            |
| 158 | GCO3+MO2 = RCOOH +<br>CH2O                        | 1.87E-13 exp(500/T) | T dep &<br>B.R.Tyndall<br>K298Villenave 98<br>See note 12 |                            |
| 159 | MAO3+MO2 = RCOOH +<br>CH2O                        | 1.87E-13 exp(500/T) | T dep &<br>B.R.Tyndall<br>K298Villenave 98<br>See note 12 |                            |
| 160 | GLCO3+MO2 = RCOOH +<br>CH2O                       | 1.87E-13 exp(500/T) | T dep &<br>B.R.Tyndall<br>K298Villenave 98<br>See note 12 |                            |
| 161 | INPN+OH = INO2                                    | 3.80E-12 exp(200/T) | DeMore,reported<br>in Horowitz as<br>MP+OH                |                            |
| 162 | PRPN+OH = PRN1                                    | 3.80E-12 exp(200/T) | JPL97,MP+OH                                               |                            |
| 163 | ETP+OH = 0.50OH+<br>0.50ETO2+0.50ALD2             | 3.80E-12 exp(200/T) | JPL97,MP+OH                                               |                            |
| 164 | RA3P+OH = 0.50OH +<br>0.50A3O2+0.50RCHO           | 3.80E-12 exp(200/T) | JPL97,MP+OH                                               |                            |
| 165 | <del>RB3P+OH =<br/>0.50OH+0.50B3O2+0.50RCHO</del> | 3.80E-12 exp(200/T) | JPL97,MP+OH                                               |                            |
|     | RB3P + OH = 0.5OH + 0.5B3O2<br>+ 0.5ACET          |                     |                                                           | DBM,lumping from<br>MCM3.1 |
| 166 | R4P+OH = 0.50OH+0.50R4O2<br>+ 0.50RCHO            | 3.80E-12 exp(200/T) | JPL97,MP+OH                                               |                            |

|     |                                                                             |                     |                        |                            |
|-----|-----------------------------------------------------------------------------|---------------------|------------------------|----------------------------|
| 167 | RP+OH =<br>0.50OH+0.50RCO3+0.50ALD<br>2                                     | 3.80E-12 exp(200/T) | JPL97,MP+OH            |                            |
| 168 | <del>PP+OH =</del><br><del>0.50OH+0.50PO2+0.50RCHO</del>                    | 3.80E-12 exp(200/T) | JPL97,MP+OH            |                            |
|     | PP + OH = PO2                                                               |                     |                        | DBM(MCM 3.1)               |
| 169 | <del>GP+OH =</del><br><del>0.50OH+0.50GCO3+0.50CH2O</del>                   | 3.80E-12 exp(200/T) | <del>JPL97,MP+OH</del> |                            |
|     | GP + OH = GCO3                                                              |                     |                        | DBM(MCM 3.1)               |
| 170 | GLP+OH =<br>0.50OH+0.50GLCO3+0.50CO                                         | 3.80E-12 exp(200/T) | JPL97,MP+OH            |                            |
| 171 | <del>RIP+OH = 0.50IAO2 + 0.40RIO2<br/>+ 0.20RIO1</del>                      | 3.80E-12 exp(200/T) | JPL97,MP+OH            |                            |
|     | RIP + OH = 0.509IALD +<br>0.509OH + 0.491RIO2                               |                     |                        | DBM,lumping from<br>MCM3.1 |
| 172 | <del>IAP+OH = 0.50OH<br/>+ 0.50RCHO + 0.50IAO2</del>                        | 3.80E-12 exp(200/T) | <del>JPL97,MP+OH</del> |                            |
|     | IAP + OH = IAO2                                                             |                     |                        | DBM(MCM 3.1)               |
| 173 | ISNP+OH =<br>0.50OH+0.50RCHO+0.50NO2<br>+0.50ISN1                           | 3.80E-12 exp(200/T) | JPL97,MP+OH            |                            |
| 174 | VRP+OH =<br>0.50OH+0.50RCHO+0.50VRO<br>2                                    | 3.80E-12 exp(200/T) | JPL97,MP+OH            |                            |
| 175 | <del>MRP+OH = 0.50OH<br/>+ 0.50RCHO + 0.50MRO2</del>                        | 3.80E-12 exp(200/T) | <del>JPL97,MP+OH</del> |                            |
|     | MRP + OH = MRO2                                                             |                     |                        | DBM(MCM 3.1)               |
| 176 | <del>MAOP+OH =</del><br><del>0.50OH+0.50RCHO +</del><br><del>0.50MAO3</del> | 3.80E-12 exp(200/T) | JPL97,MP+OH            |                            |
|     | MAOP + OH = MAO3                                                            |                     |                        | DBM(MCM 3.1)               |
| 177 | OH+MAP =<br>0.50OH+0.50CH2O +<br>0.50MCO3                                   | 3.80E-12 exp(200/T) | JPL97,MP+OH            |                            |

|     |                                                                                                               |                       |                                                           |                                                                                |
|-----|---------------------------------------------------------------------------------------------------------------|-----------------------|-----------------------------------------------------------|--------------------------------------------------------------------------------|
|     |                                                                                                               |                       |                                                           |                                                                                |
|     |                                                                                                               |                       |                                                           |                                                                                |
| 178 | C2H6+NO3 = ETO2+HNO3                                                                                          | 1.40E-18              | Atkinson,92                                               |                                                                                |
|     |                                                                                                               | <1E-17                |                                                           |                                                                                |
|     |                                                                                                               |                       |                                                           |                                                                                |
| 179 | MNO3+OH<br>=CH2O+NOMNO32                                                                                      | 5.00E-13 exp(-810/T)  | JPL02                                                     |                                                                                |
|     |                                                                                                               | 8.0E-13exp(-1000/T)   | JPL06                                                     | JMAO, The product is NO2 in the input file instead of NOMNO32.                 |
|     |                                                                                                               |                       |                                                           |                                                                                |
| 180 | IALD+OH = 0.44IAO2<br>+0.41MAO3+0.15HO2                                                                       | 3.70E-11              | Paulson &Seinfeld, 92                                     |                                                                                |
|     |                                                                                                               |                       |                                                           |                                                                                |
| 181 | IALD+O3 =<br>0.60MGLY+0.10OH+0.12CH2<br>O+0.28GLYC+0.30O3+0.40C<br>O+0.20H2+0.20HAC+0.20HC<br>OOH             | 6.16E-15 exp(-1814/T) | Paulson &Seinfeld, 92                                     | MCO3+NO,MCO3,HO2 ,RCO3,GCO3,MAO3,G LCO3 rates are used for other radicals.     |
|     |                                                                                                               |                       |                                                           |                                                                                |
| 182 | MCO3+MCO3 = 2MO2                                                                                              | 2.50E-12 exp(500/T)   | Tyndall; See note 6.                                      | RCO3+HO2 same as MCO3+HO2, RCO3+NO same as MCO3+NO, RCO3+MCO3 same asMCO3+MCO3 |
|     |                                                                                                               |                       |                                                           |                                                                                |
| 183 | MCO3+MO2 =<br>CH2O+MO2+HO2                                                                                    | 1.80E-12 exp(500/T)   | Tyndall                                                   |                                                                                |
|     |                                                                                                               |                       |                                                           |                                                                                |
| 184 | MCO3+MO2 = ACTA +CH2O                                                                                         | 2.00E-13 exp(500/T)   | Tyndall                                                   |                                                                                |
|     |                                                                                                               |                       |                                                           |                                                                                |
| 185 | R4O2+MCO3 = MO2<br>+0.32ACET+0.19MEK+0.18M<br>O2+0.27HO2+0.32ALD2+0.13<br>RCHO+0.05A3O2+0.18B3O2+<br>0.32ETO2 | 1.68E-12 exp(500/T)   | T dep &<br>B.R.Tyndall<br>K298Villenave 98<br>See note 12 |                                                                                |
|     |                                                                                                               |                       |                                                           |                                                                                |
| 186 | ATO2+MCO3 = MO2<br>+0.8HO2+0.2CH2O+0.2MCO3<br>+0.8MGLY                                                        | 1.68E-12 exp(500/T)   | Ibid.                                                     |                                                                                |
|     |                                                                                                               |                       |                                                           |                                                                                |
| 187 | KO2+MCO3 = MO2<br>+ALD2+MCO3                                                                                  | 1.68E-12 exp(500/T)   | Ibid.                                                     |                                                                                |
|     |                                                                                                               |                       |                                                           |                                                                                |

|     |                                                                                                  |                     |       |  |
|-----|--------------------------------------------------------------------------------------------------|---------------------|-------|--|
| 188 | RIO2+MCO3 =<br>MO2+0.864HO2+0.690CH2O<br>+0.402MVK+0.288MACR+0.1<br>36RIO1+0.127IALD             | 1.68E-12 exp(500/T) | Ibid. |  |
|     |                                                                                                  |                     |       |  |
| 189 | RIO1+MCO3 = MO2<br>+IALD+HO2+0.75CH2O                                                            | 1.68E-12 exp(500/T) | Ibid. |  |
|     |                                                                                                  |                     |       |  |
|     |                                                                                                  |                     |       |  |
| 190 | IAO2+MCO3 = MO2<br>+HO2+0.65CO+0.18H2+0.36H<br>AC+0.26GLYC+0.58MGLY+0.<br>4CH2O                  | 1.68E-12 exp(500/T) | Ibid. |  |
|     |                                                                                                  |                     |       |  |
| 191 | ISN1+MCO3 =<br>MO2+NO2+GLYC+HAC                                                                  | 1.68E-12 exp(500/T) | Ibid. |  |
|     |                                                                                                  |                     |       |  |
| 192 | VRO2+MCO3 =<br>MO2+0.28HO2+0.28CH2O+0.<br>72MCO3+0.72GLYC+0.28MG<br>LY                           | 1.68E-12 exp(500/T) | Ibid. |  |
|     |                                                                                                  |                     |       |  |
| 193 | MRO2+MCO3 =<br>MO2+HO2+0.17MGLY+0.83H<br>AC+0.83CO+0.17CH2O                                      | 1.68E-12 exp(500/T) | Ibid. |  |
|     |                                                                                                  |                     |       |  |
| 194 | B3O2+MCO3 =<br>MO2+HO2+ACET                                                                      | 1.68E-12 exp(500/T) | Ibid. |  |
|     |                                                                                                  |                     |       |  |
| 195 | R4N1+MCO3 =<br>MO2+NO2+0.39CH2O+0.75A<br>LD2+0.57RCHO+0.30R4O2                                   | 1.68E-12 exp(500/T) | Ibid. |  |
|     |                                                                                                  |                     |       |  |
| 196 | MVN2+MCO3 = MO2<br>+NO2+CH2O+0.5MCO3+0.5M<br>GLY+0.5HO2                                          | 1.68E-12 exp(500/T) | Ibid. |  |
|     |                                                                                                  |                     |       |  |
| 197 | MAN2+MCO3 = MO2<br>+NO2+CH2O+MGLY                                                                | 1.68E-12 exp(500/T) | Ibid. |  |
|     |                                                                                                  |                     |       |  |
|     |                                                                                                  |                     |       |  |
| 198 | INO2+MCO3 = MO2<br>+0.10NO2 + 0.80HO2<br>+0.85HNO3 + 0.05NO2<br>+0.10MACR + 0.15CH2O<br>+0.05MVK | 1.68E-12 exp(500/T) | Ibid. |  |
|     |                                                                                                  |                     |       |  |
| 199 | PRN1+MCO3 = MO2<br>+NO2+CH2O+ALD2                                                                | 1.68E-12 exp(500/T) | Ibid. |  |
|     |                                                                                                  |                     |       |  |

|     |                                   |                     |                       |  |
|-----|-----------------------------------|---------------------|-----------------------|--|
| 200 | R4O2+MCO3 = MEK +ACTA             | 1.87E-13 exp(500/T) | Ibid.                 |  |
|     |                                   |                     |                       |  |
| 201 | ATO2+MCO3 = MEK +ACTA             | 1.87E-13 exp(500/T) | Ibid.                 |  |
|     |                                   |                     |                       |  |
| 202 | KO2+MCO3 = MEK + ACTA             | 1.87E-13 exp(500/T) | Ibid.                 |  |
|     |                                   |                     |                       |  |
| 203 | RIO2+MCO3 = MEK +ACTA             | 1.87E-13 exp(500/T) | Ibid.                 |  |
|     |                                   |                     |                       |  |
| 204 | RIO1+MCO3 = MEK +ACTA             | 1.87E-13 exp(500/T) | Ibid.                 |  |
|     |                                   |                     |                       |  |
| 205 | IAO2+MCO3 = MEK+ ACTA             | 1.87E-13 exp(500/T) | Ibid.                 |  |
|     |                                   |                     |                       |  |
| 206 | VRO2+MCO3 = MEK +ACTA             | 1.87E-13 exp(500/T) | Ibid.                 |  |
|     |                                   |                     |                       |  |
| 207 | MRO2+MCO3 = MEK +ACTA             | 1.87E-13 exp(500/T) | Ibid.                 |  |
|     |                                   |                     |                       |  |
| 208 | R4N1+MCO3 = RCHO +ACTA<br>+ NO2   | 1.87E-13 exp(500/T) | Ibid.                 |  |
|     |                                   |                     |                       |  |
| 209 | ISN1+MCO3 = RCHO +ACTA<br>+ NO2   | 1.87E-13 exp(500/T) | Ibid.                 |  |
|     |                                   |                     |                       |  |
| 210 | MVN2+MCO3 = RCHO<br>+ACTA + NO2   | 1.87E-13 exp(500/T) | Ibid.                 |  |
|     |                                   |                     |                       |  |
| 211 | MAN2+MCO3 = RCHO<br>+ACTA + NO2   | 1.87E-13 exp(500/T) | Ibid.                 |  |
|     |                                   |                     |                       |  |
| 212 | INO2+MCO3 = RCHO +ACTA<br>+ NO2   | 1.87E-13 exp(500/T) | Ibid.                 |  |
|     |                                   |                     |                       |  |
| 213 | PRN1 + MCO3 = RCHO<br>+ACTA + NO2 | 1.87E-13 exp(500/T) | Ibid.                 |  |
|     |                                   |                     |                       |  |
| 214 | B3O2+MCO3 = ACET +ACTA            | 1.87E-13 exp(500/T) | Ibid.                 |  |
|     |                                   |                     |                       |  |
| 215 | MCO3+ETO2 =<br>MO2+ALD2+HO2       | 1.68E-12 exp(500/T) | Ibid.                 |  |
|     |                                   |                     |                       |  |
| 216 | MCO3+ETO2 = ACTA +ALD2            | 1.87E-13 exp(500/T) | Ibid.                 |  |
|     |                                   |                     |                       |  |
| 217 | RCO3+MCO3 = MO2 + ETO2            | 2.50E-12 exp(500/T) | Tyndall,MCO3+MC<br>O3 |  |
|     |                                   |                     |                       |  |
| 218 | GCO3+MCO3 = MO2 + HO2+<br>CH2O    | 2.50E-12 exp(500/T) | Tyndall,MCO3+MC<br>O3 |  |

|     |                                    |                                                                                        |                                                                                                                 |                                                                                                                                                                         |
|-----|------------------------------------|----------------------------------------------------------------------------------------|-----------------------------------------------------------------------------------------------------------------|-------------------------------------------------------------------------------------------------------------------------------------------------------------------------|
| 219 | MAO3+MCO3 = MO2 +<br>CH2O + MCO3   | 2.50E-12 exp(500/T)                                                                    | Tyndall,MCO3+MC<br>O3                                                                                           |                                                                                                                                                                         |
| 220 | GLCO3+MCO3 = MO2+ HO2+<br>CO       | 2.50E-12 exp(500/T)                                                                    | Tyndall,MCO3+MC<br>O3                                                                                           |                                                                                                                                                                         |
| 221 | NO3+NO3 = 2NO2 + O2                | 8.50E-13 exp(-2450/T)                                                                  | JPL 97                                                                                                          |                                                                                                                                                                         |
|     |                                    | Same                                                                                   | JPL06                                                                                                           |                                                                                                                                                                         |
| 222 | HO2 = 0.50H2O2                     | gamma=2E-1                                                                             | Jacob, 2000                                                                                                     |                                                                                                                                                                         |
| 223 | NO2 = 0.50HNO3 +0.50HNO2           | gamma=1E-4                                                                             | Jacob, 2000                                                                                                     |                                                                                                                                                                         |
| 224 | NO3 = HNO3                         | gamma=1E-3                                                                             | Jacob, 2000                                                                                                     |                                                                                                                                                                         |
| 225 | N2O5 = 2HNO3                       | gamma=                                                                                 | See                                                                                                             |                                                                                                                                                                         |
|     |                                    | fct(aerosol type, rh,<br>temp)                                                         | Appendix                                                                                                        |                                                                                                                                                                         |
| 226 | DMS+OH = SO2+MO2+CH2O              | <del>1.20E-11 exp(-260/T)</del>                                                        | JPL 2003                                                                                                        |                                                                                                                                                                         |
|     |                                    | 1.1E-11exp(-240/T)                                                                     | JPL06                                                                                                           | JMAO                                                                                                                                                                    |
| 227 | DMS+OH+O2 =<br>0.75SO2+0.25MSA+MO2 | <del>K1 = 1.7E-42exp(7810/T)-<br/>K2=5.5E-31exp(7460/T) K =<br/>K1/(1.0+K2*[O2])</del> | <del>Atkinson 89,yields<br/>from Chatfield and<br/>Crutzen 90,as-<br/>reported by Chin-<br/>et al., 1996.</del> |                                                                                                                                                                         |
|     |                                    | K1=1.0E-39exp(5820/T)<br>K2=5.0E-30exp(6280/T)<br>K=K1*[O2]/(1.0+K2*[O2])              | JPL06                                                                                                           | MJE                                                                                                                                                                     |
| 228 | DMS+NO3 = SO2+HNO3<br>+MO2+CH2O    | 1.90E-13 exp(500/T)                                                                    | JPL2003                                                                                                         |                                                                                                                                                                         |
| 229 | SO2+OH+M = SO4+HO2                 | <del>LPL: 3.00E-31(300/T)^3.3-<br/>HPL:1.50E-12 Fc: 0.6</del>                          | JPL97                                                                                                           |                                                                                                                                                                         |
|     |                                    | LPL: 3.30E-31(300/T)^4.3<br>HPL:1.60E-12 Fc: 0.6                                       | JPL06                                                                                                           | JMAO                                                                                                                                                                    |
| 230 | MAO3+NO=1.0NO2+4.0CH2O<br>+1.0HO2  | 6.7E-12exp(340/T)                                                                      | IUPAC2006                                                                                                       | This reaction doesn't<br>exist in the manual but<br>is in the input The rate<br>is from IUPAC2006 (or<br>2003), using the rate of<br>CH3CH2C(O)O2+NO=C<br>2H5C(O)O+NO2. |
|     | MAO3 + NO=MCO3 + CH2O + NO2        |                                                                                        |                                                                                                                 | Palmer, May, JMAO                                                                                                                                                       |



| Photolysis reaction |                                                                                                     |                                                                                   |                                                                                                                                                                              |              |
|---------------------|-----------------------------------------------------------------------------------------------------|-----------------------------------------------------------------------------------|------------------------------------------------------------------------------------------------------------------------------------------------------------------------------|--------------|
|                     | Photolysis reaction                                                                                 | reference                                                                         | Date updated                                                                                                                                                                 | Flag         |
|                     | $O_3 = 2OH$                                                                                         | JPL97 and Atkinson97 as reported by Wild et al., 2000; See also notes with Q flag | 1/2002                                                                                                                                                                       | Q            |
|                     | $NO_2 = NO + O_3$                                                                                   | As in Wild et al., 2000                                                           |                                                                                                                                                                              |              |
|                     | $H_2O_2 = 2OH$                                                                                      | As in Wild et al., 2000                                                           |                                                                                                                                                                              |              |
|                     | $MP = CH_2O + HO_2 + OH$                                                                            | As in Wild et al., 2000.                                                          |                                                                                                                                                                              |              |
|                     | $CH_2O = 2HO_2 + CO$                                                                                | As in Wild et al., 2000.                                                          |                                                                                                                                                                              |              |
|                     | $CH_2O = H_2 + CO$                                                                                  | As in Wild et al., 2000.                                                          |                                                                                                                                                                              |              |
|                     | $HNO_3 = OH + NO_2$                                                                                 | As in Wild et al., 2000.                                                          |                                                                                                                                                                              |              |
|                     | $HNO_2 = OH + NO$                                                                                   | As in Wild et al., 2000.                                                          |                                                                                                                                                                              |              |
|                     | $HNO_4 = OH + NO_3$                                                                                 | As in Wild et al., 2000.                                                          |                                                                                                                                                                              |              |
|                     | $NO_3 = NO_2 + O_3$                                                                                 | As in Wild et al., 2000.                                                          |                                                                                                                                                                              |              |
|                     | $NO_3 = NO + O_2$                                                                                   | As in Wild et al., 2000.                                                          |                                                                                                                                                                              |              |
|                     | $N_2O_5 = NO_2 + NO_2$                                                                              | As in Wild et al., 2000.                                                          |                                                                                                                                                                              |              |
|                     | $N_2O_5 = NO_3 + NO + O_3$                                                                          | As in Wild et al., 2000.                                                          |                                                                                                                                                                              |              |
|                     | $HNO_4 = HO_2 + NO_2$                                                                               | As in Wild et al., 2000.; See also T flag notes [Roehl, 2002]                     | 1/2002                                                                                                                                                                       | T            |
|                     | $ALD_2 = MO_2 + HO_2 + CO$                                                                          | As in Wild et al., 2000.                                                          |                                                                                                                                                                              |              |
|                     | $ALD_2 = CH_4 + CO$                                                                                 | As in Wild et al., 2000.                                                          |                                                                                                                                                                              |              |
|                     | <del>PAN = MCO<sub>3</sub> + NO<sub>2</sub></del>                                                   | <del>As in Wild et al.</del>                                                      |                                                                                                                                                                              |              |
|                     | PAN = 0.6 MCO <sub>3</sub> + 0.6 NO <sub>2</sub> + 0.4 MO <sub>2</sub> + 0.4 NO <sub>3</sub>        | JPL06                                                                             |                                                                                                                                                                              | DBM          |
|                     | $RCHO = ETO_2 + HO_2 + CO$                                                                          | As in Wild et al.                                                                 |                                                                                                                                                                              |              |
|                     | <del>ACET = MCO<sub>3</sub> + MO<sub>2</sub></del>                                                  | <del>Pressure dependent crosssections from Cameron-Smith et al., 2000</del>       |                                                                                                                                                                              |              |
|                     | ACET = MCO <sub>3</sub> + MO <sub>2</sub> ;<br>ACET = 2MO <sub>2</sub> +CO                          | FAST_JX                                                                           |                                                                                                                                                                              | Prather      |
|                     |                                                                                                     |                                                                                   |                                                                                                                                                                              |              |
|                     | <del>MEK = MCO<sub>3</sub> + ETO<sub>2</sub></del>                                                  | As in Wild et al., 2000.                                                          |                                                                                                                                                                              |              |
|                     | MEK =<br>0.15MO <sub>2</sub> +0.15RCO <sub>3</sub> +0.85MC<br>O <sub>3</sub> + 0.85ETO <sub>2</sub> | FAST_JX                                                                           |                                                                                                                                                                              | Prather      |
|                     | $MNO_3 = CH_2O + H_2O + NO_2$                                                                       | As in Wild et al., 2000.                                                          |                                                                                                                                                                              |              |
|                     | <del>GLYC = CH<sub>2</sub>O + HO<sub>2</sub> + CO</del>                                             | <del>As in Wild et al.</del>                                                      |                                                                                                                                                                              |              |
|                     | GLYC = CH <sub>2</sub> O + 2.0 HO <sub>2</sub> + CO                                                 | JPL06, Lurman1986                                                                 | GLYC + hv →<br>CH <sub>2</sub> OH + HCO;<br>CH <sub>2</sub> OH + O <sub>2</sub> →<br>CH <sub>2</sub> O + HO <sub>2</sub> ;<br>HCO + O <sub>2</sub> → CO +<br>HO <sub>2</sub> | Palmer, JMAO |
|                     | <del>GLYX = H<sub>2</sub> + 2CO</del>                                                               | <del>As in Wild et al.</del>                                                      |                                                                                                                                                                              |              |
|                     | <del>GLYX = 2CO + 2HO<sub>2</sub></del>                                                             | <del>As in Wild et al.</del>                                                      |                                                                                                                                                                              |              |
|                     | <del>GLYX = CH<sub>2</sub>O + CO</del>                                                              | <del>As in Wild et al.</del>                                                      |                                                                                                                                                                              |              |
|                     | GLYX = 0.5H <sub>2</sub> +CO+0.5CH <sub>2</sub> O+0.5CO;                                            | FAST_JX                                                                           |                                                                                                                                                                              | Prather      |
|                     | GLYX = 2CO + 2HO <sub>2</sub>                                                                       |                                                                                   |                                                                                                                                                                              |              |

|  |                                                                                                                                 |                                                                           |                |                                      |
|--|---------------------------------------------------------------------------------------------------------------------------------|---------------------------------------------------------------------------|----------------|--------------------------------------|
|  | MGLY = MCO3 + CO + HO2                                                                                                          | As in Wild et al.                                                         |                |                                      |
|  | <del>MGLY = ALD2 + CO</del>                                                                                                     | <del>As in Wild et al.</del>                                              | Removed; JPL06 | Not important according to JPL06,DBM |
|  |                                                                                                                                 |                                                                           |                | Updated in ratj.d for the yield      |
|  | MVK = PRPE + CO                                                                                                                 | As in Wild et al.                                                         |                |                                      |
|  | MVK = MCO3+CH2O+CO+HO2                                                                                                          | As in Wild et al.                                                         |                |                                      |
|  | MVK = MO2+MAO3                                                                                                                  | As in Wild et al.                                                         |                |                                      |
|  | MACR = MAO3 + HO2                                                                                                               | As in Wild et al.                                                         |                |                                      |
|  | <del>MACR = CO + HO2</del><br><del>+0.8MGLY+0.8HO2</del><br><del>+0.2MCO3+0.2CH2O</del>                                         | <del>As in Wild et al.</del>                                              |                |                                      |
|  | MACR = CO + HO2 + CH2O + MCO3                                                                                                   |                                                                           |                | DBM(MCM3.1)                          |
|  | HAC = MCO3 + CH2O + HO2                                                                                                         | Uses pressure-dependent acetone cross-section;Cameron-Smith et al., 2000. |                |                                      |
|  | INPN = OH + HO2 + RCHO + NO2                                                                                                    | Uses MP cross-section                                                     |                |                                      |
|  | PRPN = OH + HO2 + RCHO + NO2                                                                                                    | Uses MP cross-section                                                     |                |                                      |
|  | ETP = OH + HO2 + ALD2                                                                                                           | Uses MP cross-section                                                     |                |                                      |
|  | RA3P = OH + HO2 + RCHO                                                                                                          | Uses MP cross-section                                                     |                |                                      |
|  | <del>RB3P = OH + HO2 + RCHO</del>                                                                                               | Uses MP cross-section                                                     |                |                                      |
|  | RB3P = OH + HO2 + ACET                                                                                                          |                                                                           |                | DBM                                  |
|  | R4P = OH + HO2 + RCHO                                                                                                           | Uses MP cross-section                                                     |                |                                      |
|  | <del>PP = OH + HO2 + RCHO</del>                                                                                                 | Uses MP cross-section                                                     |                |                                      |
|  | PP = OH + HO2 + ALD2 + CH2O                                                                                                     |                                                                           |                | DBM(MCM 3.1)                         |
|  | RP = OH + HO2 + ALD2                                                                                                            | Uses MP cross-section                                                     |                |                                      |
|  | GP = OH + HO2 + CH2O                                                                                                            | Uses MP cross-section                                                     |                |                                      |
|  | GLP = OH + HO2 + CO                                                                                                             | Uses MP cross-section                                                     |                |                                      |
|  | <del>RIP = OH +0.864HO2 +</del><br><del>0.69CH2O +0.402MVK +</del><br><del>0.288MACR +0.136RIO1 +</del><br><del>0.127IALD</del> | <del>Uses MP cross section</del>                                          |                |                                      |
|  | RIP = OH + HO2 + 0.627CH2O + 0.368MVK + 0.259MACR + 0.373IALD                                                                   | J(41)???                                                                  |                | DBM(MCM3.1)                          |
|  | IAP = OH + HO2 + 0.67CO +0.19H2+ 0.36HAC+0.26GLYC+ 0.58MGLY                                                                     | Uses MP cross-section                                                     |                |                                      |
|  | ISNP = OH + HO2 + RCHO + NO2                                                                                                    | Uses MP cross-section                                                     |                |                                      |

|  |                                                                                                                                                                                                                                                                                                 |                                     |  |             |
|--|-------------------------------------------------------------------------------------------------------------------------------------------------------------------------------------------------------------------------------------------------------------------------------------------------|-------------------------------------|--|-------------|
|  | <del>VRP = OH + 0.28HO<sub>2</sub> + 0.28CH<sub>2</sub>O + 0.72MCO<sub>3</sub> + 0.72GLYC + 0.28MGLY</del>                                                                                                                                                                                      | Uses MP cross-section               |  |             |
|  | VRP = OH + 0.3HO <sub>2</sub> + 0.3CH <sub>2</sub> O + 0.7MCO <sub>3</sub> + 0.7GLYC + 0.3MGLY                                                                                                                                                                                                  |                                     |  | DBM(MCM3.1) |
|  | <del>MRP = OH + HO<sub>2</sub> + 0.17MGLY + 0.83HAC + 0.83CO + 0.17CH<sub>2</sub>O</del>                                                                                                                                                                                                        | Uses MP cross-section               |  |             |
|  | MRP = OH + HO <sub>2</sub> + HAC + 0.5CO + 0.5CH <sub>2</sub> O                                                                                                                                                                                                                                 |                                     |  | DBM(MCM3.1) |
|  | <del>MAOP = OH + HO<sub>2</sub> + RCHO</del>                                                                                                                                                                                                                                                    | <del>Uses MP cross-section</del>    |  |             |
|  | MAOP = OH + MCO <sub>3</sub> + CH <sub>2</sub> O                                                                                                                                                                                                                                                |                                     |  | DBM(MCM3.1) |
|  | R4N <sub>2</sub> = NO <sub>2</sub> + 0.32ACET + 0.19MEK + 0.18MO <sub>2</sub> + 0.27HO <sub>2</sub> + 0.18B <sub>3</sub> O <sub>2</sub> + 0.32ETO <sub>2</sub> + 0.32ALD <sub>2</sub> + 0.13RCHO + 0.05A <sub>3</sub> O <sub>2</sub> + 0.18B <sub>3</sub> O <sub>2</sub> + 0.32ETO <sub>2</sub> | Uses MNO <sub>3</sub> cross-section |  |             |
|  | MAP = OH + MO <sub>2</sub>                                                                                                                                                                                                                                                                      | Uses MP cross-section               |  |             |

# PHOTOLYSIS REACTIONS - MASTER RATEFILE - Paul Brown, Oliver Wild & David Rowley  
 # Centre for Atmospheric Science, Cambridge, U.K. Release date: 22 November 1993  
 # SCCS version information: @(#)photol.d 1.2 5/11/94  
 #  
 # Modified for Harvard chemistry: several reactions added, re-ordered per chem.dat  
 # Also putting in the Harvard names in col 1, the UCI x-sec names in last col !!!  
 # -Prashant Murti [4/13/98]  
 #  
 # The new peroxide recycling now activates the following photolysis species:  
 # GP,IAP,INPN,ISN1,ISNP,MAOP,MRP,PP,PRPN,RIP,VRP.  
 # Also be sure to set parameter JPMAX = 55 in "cmn\_fj.h".  
 # - Randall Martin & Bob Yantosca [12/20/00]  
 # New updates from FASTJX.(jmao,ccarouge, 04/20/09)  
 #

| #  | Harvard species |        | Products - UCI notation |          |              |               |               | UCI xsec |
|----|-----------------|--------|-------------------------|----------|--------------|---------------|---------------|----------|
| #  | =====           |        | =====                   |          |              |               | =====         |          |
| 1  | H2O             | PHOTON | OH                      | HO2      |              | 0.00E+00 0.00 | 0.0           |          |
| 2  | HO2             | PHOTON | OH                      | O(3P)    |              | 0.00E+00 0.00 | 0.0           |          |
| 3  | O2              | PHOTON | O(3P)                   | O(3P)    |              | 0.00E+00 0.00 | 100.0 O2      |          |
| 4  | O3_P            | PHOTON | O2                      | O(3P)    |              | 0.00E+00 0.00 | 100.0 O3      |          |
| 5  | O3              | PHOTON | O2                      | O(1D)    |              | 0.00E+00 0.00 | 100.0 O3_1d   |          |
| 6  | NO2             | PHOTON | NO                      | O(3P)    |              | 0.00E+00 0.00 | 100.0 NO2     |          |
| 7  | H2O2            | PHOTON | OH                      | OH       |              | 0.00E+00 0.00 | 100.0 H2O2    |          |
| 8  | MP              | PHOTON | HCHO                    | OH       | HO2          | 0.00E+00 0.00 | 100.0 ROOH    |          |
| 9  | CH2O            | PHOTON | CO                      | HO2      | HO2          | 0.00E+00 0.00 | 100.0 HCHO=H+ |          |
| 10 | CH2O            | PHOTON | CO                      | H2       |              | 0.00E+00 0.00 | 100.0 HCHO=H2 |          |
| 11 | HNO3            | PHOTON | OH                      | NO2      |              | 0.00E+00 0.00 | 100.0 HONO2   |          |
| 12 | HNO2            | PHOTON | OH                      | NO       |              | 0.00E+00 0.00 | 100.0 HONO    |          |
| 13 | HNO4            | PHOTON | OH                      | NO3      |              | 0.00E+00 0.00 | 5.0 HO2NO2    |          |
| 14 | HNO4            | PHOTON | HO2                     | NO2      |              | 0.00E+00 0.00 | 95.0 HO2NO2   |          |
| 15 | NO3             | PHOTON | NO                      | O2       |              | 0.00E+00 0.00 | 100.0 NO3=O2+ |          |
| 16 | NO3             | PHOTON | NO2                     | O(3P)    |              | 0.00E+00 0.00 | 100.0 NO3=O+  |          |
| 17 | N2O5            | PHOTON | NO3                     | NO       | O(3P)        | 0.00E+00 0.00 | 0.0 N2O5      |          |
| 18 | N2O5            | PHOTON | NO3                     | NO2      |              | 0.00E+00 0.00 | 100.0 N2O5    |          |
| 19 | ALD2            | PHOTON | CH4                     | CO       |              | 0.00E+00 0.00 | 100.0 Acet=R+ |          |
| 20 | ALD2            | PHOTON | MeOO                    | HO2      | CO           | 0.00E+00 0.00 | 100.0 Acet=RO |          |
| 21 | PAN             | PHOTON | MeCO3                   | NO2      |              | 0.00E+00 0.00 | 100.0 PAN     |          |
| 22 | RCHO            | PHOTON | EtO2                    | HO2      | CO           | 0.00E+00 0.00 | 100.0 RCHO    |          |
| 23 | ACET            | PHOTON | MeCO3                   | MeOO     |              | 0.00E+00 0.00 | 100.0 AcetA   |          |
| 24 | ACET            | PHOTON | MeOO                    | MeOO     | CO           | 0.00E+00 0.00 | 100.0 AcetB   |          |
| 25 | MEK             | PHOTON | MeCO3                   | EtOO     |              | 0.00E+00 0.00 | 100.0 EtCOMe  |          |
| 26 | MNO3            | PHOTON | HCHO                    | H2O      | NO2          | 0.00E+00 0.00 | 100.0 MeNO3   |          |
| 27 | GLYC            | PHOTON | HCHO                    | HO2      | CO           | 0.00E+00 0.00 | 100.0 HOMeCHO |          |
| 28 | GLYX            | PHOTON | H2                      | CO       | HCHO         | 0.00E+00 0.00 | 100.0 Glyxla  |          |
| 29 | GLYX            | PHOTON | CO                      | HO2      |              | 0.00E+00 0.00 | 100.0 Glyxlb  |          |
| 30 | MGLY            | PHOTON | MeCO3                   | CO       | HO2          | 0.00E+00 0.00 | 100.0 MeCOCHO |          |
| 31 | MGLY            | PHOTON | Acet                    | CO       |              | 0.00E+00 0.00 | 0.0 MeCOCHO   |          |
| 32 | MVK             | PHOTON | PRPE                    | CO       |              | 0.00E+00 0.00 | 60.0 MeCOVi   |          |
| 33 | MVK             | PHOTON | MeCO3                   | HCHO     | CO HO2       | 0.00E+00 0.00 | 20.0 MeCOVi   |          |
| 34 | MVK             | PHOTON | MeOO                    | MAO3     |              | 0.00E+00 0.00 | 20.0 MeCOVi   |          |
| 35 | MACR            | PHOTON | MAO3                    | HO2      |              | 0.00E+00 0.00 | 50.0 MACR     |          |
| 36 | MACR            | PHOTON | CO HO2                  | MGLY HO2 | MeCO3 HCHO   | 0.00E+00 0.00 | 50.0 MACR     |          |
| 37 | HAC             | PHOTON | MeCO3                   | HCHO     | HO2          | 0.00E+00 0.00 | 100.0 AcetA   |          |
| 38 | ETP             | PHOTON | OH                      | HO2      | Acet         | 0.00E+00 0.00 | 100.0 ROOH    |          |
| 39 | RA3P            | PHOTON | OH                      | HO2      | RCHO         | 0.00E+00 0.00 | 100.0 ROOH    |          |
| 40 | RB3P            | PHOTON | OH                      | HO2      | RCHO         | 0.00E+00 0.00 | 100.0 ROOH    |          |
| 41 | R4P             | PHOTON | OH                      | HO2      | RCHO         | 0.00E+00 0.00 | 100.0 ROOH    |          |
| 42 | RP              | PHOTON | OH                      | HO2      | Acet         | 0.00E+00 0.00 | 100.0 ROOH    |          |
| 43 | R4N2            | PHOTON | NO2 MeCOMe              | MEK MO2  | HO2 ALD2 ... | 0.00E+00 0.00 | 100.0 MeNO3   |          |
| 44 | MAP             | PHOTON | OH                      | MO2      |              | 0.00E+00 0.00 | 100.0 ROOH    |          |
| 45 | INPN            | PHOTON | OH                      | HO2      | RCHO NO2     | 0.00E+00 0.00 | 100.0 ROOH    |          |
| 46 | PRPN            | PHOTON | OH                      | HO2      | RCHO NO2     | 0.00E+00 0.00 | 100.0 ROOH    |          |
| 47 | PP              | PHOTON | OH                      | HO2      | RCHO         | 0.00E+00 0.00 | 100.0 ROOH    |          |

|      |      |        |    |     |      |          |          |       |          |
|------|------|--------|----|-----|------|----------|----------|-------|----------|
| 48   | GP   | PHOTON | OH | HO2 | RCHO | 0.00E+00 | 0.00     | 100.0 | ROOH     |
| 49   | GLP  | PHOTON | OH | HO2 | RCHO | 0.00E+00 | 0.00     | 100.0 | ROOH     |
| 50   | RIP  | PHOTON | OH | HO2 | CH2O | MVK      | MACR     | RIO1  | IALD     |
| 51   | IAP  | PHOTON | OH | HO2 | CO   | H2       | HAC      | GLYC  | MGLY     |
| 52   | ISNP | PHOTON | OH | HO2 | RCHO | NO2      | 0.00E+00 | 0.00  | 100.0    |
| 53   | VRP  | PHOTON | OH | HO2 | CH2O | MCO3     | GLYC     | MGLY  | 0.00E+00 |
| 54   | MRP  | PHOTON | OH | HO2 | MGLY | HAC      | CO       | CH2O  | 0.00E+00 |
| 55   | MAOP | PHOTON | OH | HO2 | RCHO | 0.00E+00 | 0.00     | 100.0 | ROOH     |
| 9999 |      |        |    |     |      | 0.00E-00 | 0.00     | 0.0   |          |

# NOTES:

-----

[4/15/98]

Oliver Wild: All reaction data from JPL '97, IUPAC IV. IUPAC V is soon expected. - ppm

All reaction data taken from IUPAC supplement IV unless otherwise indicated.

JPL - data from JPL (latest assessment as far as possible)

? - reaction products unknown

\* - user strongly advised to consult source material

B - branching ratio assumed equal for all channels in the absence of more information

U - upper limit for rate coefficient

Changes since 08/3/93 release:

O now written as O(3P)

(Note that the second of the acetaldehyde channels above occurs at wavelengths less than 289 nm, and therefore doesn't appear in the Fast-J region at all - I've simply included it here for completeness) - [from Oliver, 3/7/98]

JV\_SPEC.dat updates(mostly cut from the visible wavelength bins of FASTJX 6.4, except Solar Flux, O3 cross section, NO2 cross section are from Huisheng Bian and Michael Prather's latest updates in 2009): Green is the value to be updated.Red is the value significantly changed.

Notes:1.Acetone photolysis is implemented by Claire.2. Pressure dependence is updated for MVK,MEK, MGLY by Claire. 3.Glyoxal reactions and branching ratio have been changed here and ratj.d

| JV_SPEC.dat | FAST-J std | JPL       | 0 (mje 4/02) |           |           | aer/dust(rvm,3/02) |           |           |
|-------------|------------|-----------|--------------|-----------|-----------|--------------------|-----------|-----------|
| NW-JValue   | 27         | 7         | 1            | 7         | NJVAL,    | NWWW,              | NW1:NW2   |           |
| w-beg(nm)   |            | 289       | 298.25       | 307.45    | 312.45    | 320.3              | 345       | 412.45    |
| w-end(nm)   |            | 298.25    | 307.45       | 312.45    | 320.3     | 345                | 412.45    | 850       |
| w-eff(nm)   |            | 294       | 303          | 310       | 316       | 333                | 380       | 574       |
| SOL#/cm2/s  |            | 7.352E+14 | 7.332E+14    | 5.022E+14 | 8.709E+14 | 3.786E+15          | 1.544E+16 | 2.11E+17  |
|             | New        | 5.882E+14 | 7.686E+14    | 5.046E+14 | 8.906E+14 | 3.854E+15          | 1.548E+16 | 2.131E+17 |
| Raylay      | cm2        | 6.180E-26 | 5.430E-26    | 4.920E-26 | 4.540E-26 | 3.630E-26          | 2.09E-26  | 3.830E-27 |
|             |            | 6.131E-26 | 5.422E-26    | 4.923E-26 | 4.514E-26 | 3.643E-26          | 2.087E-26 | 3.848E-27 |
| BCarb       | m2/g       | 10.08     | 9.96         | 9.87      | 9.79      | 9.58               | 9         | 6.5       |
| O2          | 180        |           |              |           |           |                    |           |           |
| O2          | 260        |           |              |           |           |                    |           |           |
| O2          | 300        |           |              |           |           |                    |           |           |
| O3          | 180        | 8.693E-19 | 2.365E-19    | 8.722E-20 | 3.694E-20 | 4.295E-21          | 1.804E-23 | 1.630E-21 |
|             | 180        | 7.561E-19 | 2.367E-19    | 8.756E-20 | 3.69E-20  | 4.256E-21          | 1.806E-23 | 1.625E-21 |
| O3          | 260        | 9.189E-19 | 2.571E-19    | 9.673E-20 | 4.141E-20 | 5.457E-21          | 2.775E-23 | 1.630E-21 |
|             | 260        | 8.016E-19 | 2.572E-19    | 9.71E-20  | 4.136E-20 | 5.409E-21          | 2.784E-23 | 1.625E-21 |
| O3          | 300        | 9.574E-19 | 2.777E-19    | 1.075E-19 | 4.725E-20 | 6.782E-21          | 4.824E-23 | 1.630E-21 |
|             | 300        | 8.391E-19 | 2.778E-19    | 1.079E-19 | 4.72E-20  | 6.725E-21          | 4.845E-23 | 1.625E-21 |
| O3_1d       | 180        | 0.9       | 0.9          | 0.3824    | 0.08092   | 0.0765             | 0         | 0         |
|             | 180        | 0.9       | 0.8941       | 0.4501    | 0.09189   | 0.07915            | 0.065     | 0         |
| O3_1d       | 260        | 0.9       | 0.9          | 0.4531    | 0.1438    | 0.07654            | 0         | 0         |
|             | 260        | 0.9       | 0.8948       | 0.4992    | 0.1463    | 0.08728            | 0.07017   | 0         |
| O3_1d       | 300        | 0.9       | 0.9          | 0.5273    | 0.2395    | 0.07659            | 0         | 0         |
|             | 300        | 0.9       | 0.8965       | 0.5636    | 0.2349    | 0.1002             | 0.07435   | 0         |
| NO2         | 200        | 1.048E-19 | 1.494E-19    | 1.898E-19 | 2.295E-19 | 3.391E-19          | 4.230E-19 | 4.047E-22 |
|             | 220        | 1.173E-19 | 1.603E-19    | 1.966E-19 | 2.349E-19 | 3.354E-19          | 4.473E-19 | 2.339E-22 |
| NO2         | 300        | 1.039E-19 | 1.462E-19    | 1.845E-19 | 2.223E-19 | 3.256E-19          | 4.150E-19 | 4.02E-22  |
|             | 298        | 1.165E-19 | 1.617E-19    | 2.021E-19 | 2.455E-19 | 3.619E-19          | 4.680E-19 | 4.291E-22 |
| H2O2        | 200        | 8.838E-21 | 4.991E-21    | 3.190E-21 | 2.099E-21 | 7.716E-22          | 1.707E-23 | 0         |
|             | 200        | 8.360E-21 | 5.008E-21    | 3.220E-21 | 2.115E-21 | 7.984E-22          | 2.101E-23 | 0         |
| H2O2        | 300        | 9.801E-21 | 5.718E-21    | 3.773E-21 | 2.568E-21 | 1.02E-21           | 2.287E-23 | 0         |
|             | 300        | 9.300E-21 | 5.735E-21    | 3.803E-21 | 2.583E-21 | 1.046E-21          | 2.715E-23 | 0         |
| ROOH        | 300        | 5.883E-21 | 3.573E-21    | 2.437E-21 | 1.756E-21 | 7.428E-22          | 4.194E-23 | 0         |
|             | 297        | 5.621E-21 | 3.573E-21    | 2.441E-21 | 1.755E-21 | 7.405E-22          | 4.261E-23 | 0         |
| ROOH        | 300        | 5.883E-21 | 3.573E-21    | 2.437E-21 | 1.756E-21 | 7.428E-22          | 4.194E-23 | 0         |
|             | 298        | 5.621E-21 | 3.573E-21    | 2.441E-21 | 1.755E-21 | 7.405E-22          | 4.261E-23 | 0         |
| HCHO=H+     | 223        | 0         | 1.969E-20    | 1.274E-20 | 1.971E-20 | 4.354E-21          | 0         | 0         |
|             | 223        | 0         | 1.945E-20    | 1.289E-20 | 1.969E-20 | 4.324E-21          | 5.105E-26 | 0         |
| HCHO=H+     | 293        | 0         | 1.873E-20    | 1.304E-20 | 1.896E-20 | 3.949E-21          | 0         | 0         |
|             | 293        | 0         | 1.85E-20     | 1.317E-20 | 1.895E-20 | 3.922E-21          | 4.467E-26 | 0         |
| HCHO=H2     | 223        | 0         | 6.475E-21    | 4.392E-21 | 9.027E-21 | 1.041E-20          | 1.946E-22 | 0         |
|             | 223        | 0         | 6.397E-21    | 4.443E-21 | 9.027E-21 | 1.04E-20           | 1.960E-22 | 0         |
| HCHO=H2     | 293        | 0         | 6.163E-21    | 4.500E-21 | 8.715E-21 | 9.434E-21          | 1.883E-22 | 0         |
|             | 293        | 0         | 6.086E-21    | 4.543E-21 | 8.717E-21 | 9.424E-21          | 1.903E-22 | 0         |
| HONO2       | 200        | 3.706E-21 | 1.377E-21    | 5.451E-22 | 2.102E-22 | 2.154E-23          | 8.105E-26 | 0         |
|             | 200        | 3.396E-21 | 1.377E-21    | 5.474E-22 | 2.100E-22 | 2.131E-23          | 8.822E-26 | 0         |
| HONO2       | 300        | 4.747E-21 | 1.923E-21    | 8.314E-22 | 3.589E-22 | 4.764E-23          | 2.499E-25 | 0         |

|             |     |           |           |           |           |           |           |           |
|-------------|-----|-----------|-----------|-----------|-----------|-----------|-----------|-----------|
|             | 300 | 4.384E-21 | 1.923E-21 | 8.345E-22 | 3.586E-22 | 4.720E-23 | 2.683E-25 | 0         |
| HONO        | 300 | 0         | 0         | 1.265E-20 | 3.469E-20 | 1.09E-19  | 8.644E-20 | 0         |
|             | 297 | 0         | 0         | 1.175E-20 | 3.47E-20  | 1.093E-19 | 8.764E-20 | 0         |
| HONO        | 300 | 0         | 0         | 1.265E-20 | 3.469E-20 | 1.09E-19  | 8.644E-20 | 0         |
|             | 298 | 0         | 0         | 1.175E-20 | 3.47E-20  | 1.093E-19 | 8.764E-20 | 0         |
| HO2NO2      | 300 | 2.869E-20 | 1.102E-20 | 5.222E-21 | 2.794E-21 | 3.255E-22 | 0         | 0         |
|             | 297 | 2.601E-20 | 1.103E-20 | 5.239E-21 | 2.793E-21 | 2.250E-22 | 0         | 4.792E-23 |
| HO2NO2      | 300 | 2.869E-20 | 1.102E-20 | 5.222E-21 | 2.794E-21 | 3.255E-22 | 0         | 0         |
|             | 298 | 2.601E-20 | 1.103E-20 | 5.239E-21 | 2.793E-21 | 2.250E-22 | 0         | 4.792E-23 |
| NO3=O+      | 298 | 0         | 0         | 0         | 0         | 0         | 0         | 7.428E-19 |
|             | 297 | 0         | 0         | 0         | 0         | 0         | 0         | 7.321E-19 |
| NO3=O+      | 298 | 0         | 0         | 0         | 0         | 0         | 0         | 7.428E-19 |
|             | 298 | 0         | 0         | 0         | 0         | 0         | 0         | 7.321E-19 |
| NO3=O2+     | 298 | 0         | 0         | 0         | 0         | 0         | 0         | 9.569E-20 |
|             | 297 | 0         | 0         | 0         | 0         | 0         | 0         | 9.435E-20 |
| NO3=O2+     | 298 | 0         | 0         | 0         | 0         | 0         | 0         | 9.569E-20 |
|             | 298 | 0         | 0         | 0         | 0         | 0         | 0         | 9.435E-20 |
| N2O5        | 225 | 4.13E-20  | 1.998E-20 | 1.167E-20 | 7.250E-21 | 2.296E-21 | 1.161E-22 | 0         |
|             | 225 | 3.823E-20 | 1.998E-20 | 1.17E-20  | 7.246E-21 | 2.286E-21 | 1.173E-22 | 0         |
| N2O5        | 300 | 5.718E-20 | 3.317E-20 | 2.223E-20 | 1.552E-20 | 6.409E-21 | 5.415E-22 | 0         |
|             | 300 | 5.404E-20 | 3.317E-20 | 2.226E-20 | 1.551E-20 | 6.389E-21 | 5.481E-22 | 0         |
| Acet=RO     | 298 | 4.008E-20 | 2.869E-20 | 1.84E-20  | 3.626E-21 | 0         | 0         | 0         |
| with yield? | 298 | 2.161E-20 | 1.46E-20  | 8.410E-21 | 3.335E-21 | 1.751E-22 | 0         | 0         |
| Acet=RO     | 298 | 4.008E-20 | 2.869E-20 | 1.84E-20  | 3.626E-21 | 0         | 0         | 0         |
|             | 298 | 2.161E-20 | 1.46E-20  | 8.410E-21 | 3.335E-21 | 1.751E-22 | 0         | 0         |
| Acet=R+     | 298 | 0         | 0         | 0         | 0         | 0         | 0         | 0         |
|             | 298 | 0         | 0         | 0         | 0         | 0         | 0         | 0         |
| Acet=R+     | 298 | 0         | 0         | 0         | 0         | 0         | 0         | 0         |
|             | 298 | 0         | 0         | 0         | 0         | 0         | 0         | 0         |
| PAN         | 250 | 2.714E-21 | 9.251E-22 | 4.342E-22 | 2.290E-22 | 5.508E-23 | 6.551E-25 | 0         |
|             | 250 | 2.438E-21 | 9.252E-22 | 4.355E-22 | 2.288E-22 | 5.480E-23 | 6.941E-25 | 0         |
| PAN         | 298 | 3.931E-21 | 1.399E-21 | 6.730E-22 | 3.630E-22 | 9.301E-23 | 1.193E-24 | 0         |
|             | 298 | 3.555E-21 | 1.399E-21 | 6.750E-22 | 3.627E-22 | 9.257E-23 | 1.265E-24 | 0         |
| RCHO        | 298 | 5.203E-20 | 3.671E-20 | 2.22E-20  | 1.17E-20  | 1.569E-21 | 0         | 0         |
|             | 297 | 5.548E-20 | 4.63E-20  | 3.578E-20 | 2.441E-20 | 5.853E-21 | 1.257E-23 | 0         |
| RCHO        | 298 | 5.203E-20 | 3.671E-20 | 2.22E-20  | 1.17E-20  | 1.569E-21 | 0         | 0         |
|             | 298 | 5.548E-20 | 4.63E-20  | 3.578E-20 | 2.441E-20 | 5.853E-21 | 1.257E-23 | 0         |
| Acetone     | 235 | 2.98E-20  | 1.30E-20  | 4.32E-21  | 1.04E-21  | 5.88E-23  | 1.53E-25  | 0.00E+00  |
| Acetone     | 298 | 3.26E-20  | 1.48E-20  | 5.18E-21  | 1.30E-21  | 9.62E-23  | 2.67E-25  | 0.00E+00  |
| AcetA       | 220 | 3.100E-20 | 1.944E-20 | 1.088E-20 | 5.532E-21 | 4.637E-22 | 3.425E-25 | 0         |
| AcetA       | 300 | 3.439E-20 | 2.255E-20 | 1.356E-20 | 7.273E-21 | 8.481E-22 | 6.682E-25 | 0         |
| AcetB       | 240 | 5.156E-03 | 1.931E-03 | 8.022E-04 | 4.144E-04 | 4.156E-05 | 0         | 0         |
| AcetB       | 300 | 8.564E-02 | 5.100E-02 | 3.298E-02 | 2.214E-02 | 3.533E-03 | 0         | 0         |
| EtCOMe      | 298 | 1.432E-20 | 4.217E-21 | 1.150E-21 | 3.394E-22 | 4.706E-23 | 0         | 0         |
|             | 297 | 4.170E-20 | 2.684E-20 | 1.57E-20  | 7.721E-21 | 8.142E-22 | 3.734E-25 | 0         |
| EtCOMe      | 298 | 1.432E-20 | 4.217E-21 | 1.150E-21 | 3.394E-22 | 4.706E-23 | 0         | 0         |
|             | 298 | 4.170E-20 | 2.684E-20 | 1.57E-20  | 7.721E-21 | 8.142E-22 | 3.734E-25 | 0         |

|         |     |           |           |           |           |           |           |           |
|---------|-----|-----------|-----------|-----------|-----------|-----------|-----------|-----------|
| MeNO3   | 298 | 2.871E-20 | 1.08E-20  | 5.497E-21 | 3.460E-21 | 2.919E-22 | 0         | 0         |
|         | 240 | 4.679E-21 | 2.022E-21 | 9.381E-22 | 3.730E-22 | 3.755E-23 | 0         | 0         |
| MeNO3   | 298 | 2.871E-20 | 1.08E-20  | 5.497E-21 | 3.460E-21 | 2.919E-22 | 0         | 0         |
|         | 298 | 6.029E-21 | 2.735E-21 | 1.346E-21 | 5.734E-22 | 6.957E-23 | 0         | 0         |
| HOMeCHO | 296 | 2.322E-20 | 1.773E-20 | 1.139E-20 | 5.584E-21 | 3.639E-22 | 0         | 0         |
|         | 297 | 2.784E-20 | 1.706E-20 | 9.411E-21 | 4.388E-21 | 4.937E-22 | 0         | 0         |
| HOMeCHO | 296 | 2.322E-20 | 1.773E-20 | 1.139E-20 | 5.584E-21 | 3.639E-22 | 0         | 0         |
|         | 298 | 2.784E-20 | 1.706E-20 | 9.411E-21 | 4.388E-21 | 4.937E-22 | 0         | 0         |
| HCOCHO  | 298 | 9.701E-22 | 1.498E-21 | 8.257E-21 | 1.434E-21 | 2.078E-22 | 6.393E-22 | 3.277E-22 |
| HCOCHO  | 298 | 9.701E-22 | 1.498E-21 | 8.257E-21 | 1.434E-21 | 2.078E-22 | 6.393E-22 | 3.277E-22 |
| Glyxla  | 297 | 0         | 0         | 0         | 0         | 0         | 5.914E-22 | 2.199E-22 |
| Glyxla  | 298 | 0         | 0         | 0         | 0         | 0         | 5.914E-22 | 2.199E-22 |
| Glyxlb  | 297 | 1.333E-20 | 1.238E-20 | 1.117E-20 | 8.335E-21 | 2.625E-21 | 0         | 0         |
| Glyxlb  | 298 | 1.333E-20 | 1.238E-20 | 1.117E-20 | 8.335E-21 | 2.625E-21 | 0         | 0         |
| MeCOCHO | 298 | 2.381E-21 | 1.853E-21 | 1.296E-21 | 9.572E-22 | 3.327E-22 | 2.004E-21 | 4.255E-22 |
|         | 297 | 4.384E-20 | 3.465E-20 | 2.428E-20 | 1.788E-20 | 6.194E-21 | 2.237E-20 | 1.435E-21 |
| MeCOCHO | 298 | 2.381E-21 | 1.853E-21 | 1.296E-21 | 9.572E-22 | 3.327E-22 | 2.004E-21 | 4.255E-22 |
|         | 298 | 4.384E-20 | 3.465E-20 | 2.428E-20 | 1.788E-20 | 6.194E-21 | 2.237E-20 | 1.435E-21 |
| MeCOVi  | 298 | 1.388E-21 | 1.985E-21 | 2.587E-21 | 2.837E-21 | 3.115E-21 | 6.627E-22 | 0         |
|         | 297 | 5.521E-21 | 7.955E-21 | 8.828E-21 | 7.236E-21 | 3.374E-21 | 1.790E-22 | 0         |
| MeCOVi  | 298 | 1.388E-21 | 1.985E-21 | 2.587E-21 | 2.837E-21 | 3.115E-21 | 6.627E-22 | 0         |
|         | 298 | 5.521E-21 | 7.955E-21 | 8.828E-21 | 7.236E-21 | 3.374E-21 | 1.790E-22 | 0         |
| MACR    | 298 | 7.862E-22 | 1.215E-21 | 1.645E-21 | 1.804E-21 | 1.998E-21 | 3.654E-22 | 0         |
|         | 297 | 2.107E-22 | 3.151E-22 | 3.995E-22 | 4.742E-22 | 5.222E-22 | 1.064E-22 | 0         |
| MACR    | 298 | 7.862E-22 | 1.215E-21 | 1.645E-21 | 1.804E-21 | 1.998E-21 | 3.654E-22 | 0         |
|         | 298 | 2.107E-22 | 3.151E-22 | 3.995E-22 | 4.742E-22 | 5.222E-22 | 1.064E-22 | 0         |
| CH3I    | 225 | 3.289E-20 | 9.071E-21 | 4.037E-21 | 2.073E-21 | 3.577E-22 | 1.551E-24 | 0         |
|         | 210 | 2.781E-20 | 8.253E-21 | 3.557E-21 | 1.826E-21 | 3.437E-22 | 2.347E-24 | 0         |
| CH3I    | 298 | 5.024E-20 | 1.479E-20 | 6.296E-21 | 3.199E-21 | 6.783E-22 | 6.121E-24 | 0         |
|         | 298 | 4.648E-20 | 1.511E-20 | 6.466E-21 | 3.293E-21 | 6.699E-22 | 9.781E-24 | 0         |
| Q1A-Ac  | 240 | 1.00E+00  | 1.21E+00  | 4.133E+00 | 2.498E+01 | 9.452E+01 | 1.000E+02 | 1.00E+02  |
| Q1A-Ac  | 300 | 1.01E+00  | 1.22E+00  | 2.411E+00 | 6.656E+00 | 1.969E+01 | 2.100E+01 | 2.10E+01  |
| Q1B-Ac  | 240 | 1.03E+00  | 1.07E+01  | 5.202E+01 | 2.632E+02 | 2.760E+03 | 3.210E+03 | 3.21E+03  |
| Q1B-Ac  | 300 | 8.79E-01  | 4.90E+00  | 1.617E+01 | 5.268E+01 | 3.023E+02 | 3.420E+02 | 3.42E+02  |

=====Pressure Dependencies=====

Pressure Dep: 5

|         |   |          |          |           |           |           |           |          |
|---------|---|----------|----------|-----------|-----------|-----------|-----------|----------|
| MeCOVi  | 1 | 1.67E-19 | 1.67E-19 | 1.670E-19 | 1.670E-19 | 1.670E-19 | 1.670E-19 | 1.67E-19 |
| EtCOMe  | 1 | 8.00E-20 | 8.00E-20 | 8.000E-20 | 8.000E-20 | 8.000E-20 | 8.000E-20 | 8.00E-20 |
| MeCOCHO | 1 | 1.66E-19 | 1.66E-19 | 1.660E-19 | 1.660E-19 | 1.660E-19 | 1.660E-19 | 1.66E-19 |
| AcetA   | 2 | 1.00E+00 | 1.00E+00 | 1.000E+00 | 1.000E+00 | 1.000E+00 | 1.000E+00 | 1.00E+00 |
| AcetB   | 3 | 1.00E+00 | 1.00E+00 | 1.000E+00 | 1.000E+00 | 1.000E+00 | 1.000E+00 | 1.00E+00 |

=====Pressure Dependencies=====

From Fast-JX(Michael Prather)

NO3 => NO+O2 [0.11414] fixed

=> NO2+O [0.88586]

Acet=RO is multiplied by the branching ratio

PAN = Peroxyacetyl nitrate =  $\text{CH}_3\text{C}(\text{O})\text{COONO}_2$   
 $\Rightarrow \text{CH}_3\text{C}(\text{O})\text{O}_2 + \text{NO}_2$   
 CH<sub>3</sub>NO<sub>3</sub> = CH<sub>3</sub>ONO<sub>2</sub> = Methyl nitrate  
 $\Rightarrow \text{CH}_3\text{O} + \text{NO}_2$   
 ActAld = Acetaldehyde =  $\text{CH}_3\text{CHO}$   
 $\Rightarrow \text{CH}_3 + \text{HCO}$   
 MeVK = Methylvinyl ketone =  $\text{CH}_3\text{C}(\text{O})\text{CH}=\text{CH}_2$   
 $\Rightarrow \text{C}_3\text{H}_6 + \text{CO}$  [0.6]  
 $\Rightarrow \text{CH}_2\text{CHCO} + \text{CH}_3$  [0.4]  
 to be scaled by density  $1/(1 + 1.67\text{e-}19 \cdot M)$   
 MeAcr = Methacrolein  $\text{CH}_2\text{C}(\text{CH}_3)\text{CHO}$   
 $\Rightarrow \text{CH}_2=\text{C}(\text{CH}_3) + \text{HCO}$   
 X-sect includes q-yld = 0.008  
 GlyAld = Glycol aldehyde =  $\text{HOCH}_2\text{CHO}$   
 $\Rightarrow \text{HOCH}_2 + \text{HCO}$   
 X-sect includes q-yld = 0.75  
 MEKeto = Methyl ethyl ketone =  $\text{CH}_3\text{COC}_2\text{H}_5$   
 $\Rightarrow \text{C}_2\text{H}_5 + \text{CH}_3\text{CO}$  [.85]  
 $\Rightarrow \text{CH}_3 + \text{C}_2\text{H}_5\text{CO}$  [.15]  
 to be scaled by pressure  $1/(1 + 2.0 \cdot M(\text{bar}))$   
 EAld = Ethyl aldehyde =  $\text{C}_2\text{H}_5\text{CHO}$   
 $\Rightarrow \text{C}_2\text{H}_5 + \text{HCO}$   
 MGlyxl = Methyl glyoxal =  $\text{CH}_3\text{COCHO}$   
 $\Rightarrow \text{CH}_3\text{CO} + \text{HCO}$   
 includes \*qyld-0(wvl)  
 to be scaled by pressure  $1/(1 + 4.15 \cdot M(\text{bar}))$   
 Glyxl = Glyoxal  $(\text{CHO})_2$   
 Glyxla  $\Rightarrow \text{H}_2 + \text{CO} + \text{CO}$  or  $\text{CO} + \text{CH}_2\text{O}$  wvl > 340 nm  
 X-sect includes qyld-2 [0.029]  
 Glyxlb  $\Rightarrow \text{HCO} + \text{HCO}$  wvl < 340 nm  
 X-sect includes qyld-1 [0.40]  
 C<sub>3</sub>H<sub>6</sub>O = Acet = Acetone =  $\text{CH}_3\text{C}(\text{O})\text{CH}_3$   
 Acet-A  $\Rightarrow \text{CH}_3\text{CO} + \text{CH}_3$   
 Acet-B  $\Rightarrow \text{CH}_3 + \text{CH}_3 + \text{CO}$   
 q-ylds scale with T and density  
 Q1A-Ac and Q1B-Ac are for the pressure dependence of Acetone.

# Updates from Randall Martin

## 15 Mdust 0.15 = mineral dust (R.V.Martin)

|     |        |       |       |       |       |       |       |       |       |       |       |
|-----|--------|-------|-------|-------|-------|-------|-------|-------|-------|-------|-------|
| 300 | 4.0154 | 0.151 | 0.964 | 1.000 | 2.104 | 2.573 | 2.380 | 1.837 | 1.226 | 0.608 | 0.153 |
| 400 | 3.0582 | 0.151 | 0.986 | 1.000 | 2.021 | 2.061 | 1.505 | 0.757 | 0.210 | 0.057 | 0.010 |
| 600 | 1.2133 | 0.151 | 0.994 | 1.000 | 1.712 | 1.120 | 0.368 | 0.096 | 0.015 | 0.002 | 0.000 |
| 999 | 0.2195 | 0.151 | 0.988 | 1.000 | 0.628 | 0.573 | 0.113 | 0.011 | 0.001 | 0.000 | 0.000 |

## 16 Mdust 0.25 = mineral dust (R.V.Martin)

|     |        |       |       |       |       |       |       |       |       |       |       |
|-----|--------|-------|-------|-------|-------|-------|-------|-------|-------|-------|-------|
| 300 | 2.6560 | 0.253 | 0.905 | 1.000 | 1.666 | 2.248 | 1.871 | 2.248 | 2.056 | 2.231 | 2.048 |
| 400 | 3.9669 | 0.253 | 0.980 | 1.000 | 2.060 | 2.715 | 2.658 | 2.515 | 2.163 | 1.591 | 1.024 |
| 600 | 3.2556 | 0.253 | 0.996 | 1.000 | 2.077 | 2.287 | 1.790 | 1.017 | 0.388 | 0.147 | 0.031 |
| 999 | 1.1019 | 0.253 | 0.994 | 1.000 | 1.708 | 1.120 | 0.374 | 0.096 | 0.015 | 0.002 | 0.000 |

## 17 Mdust 0.4 = mineral dust (R.V.Martin)

|     |        |       |       |       |       |       |       |       |       |       |       |
|-----|--------|-------|-------|-------|-------|-------|-------|-------|-------|-------|-------|
| 300 | 2.6071 | 0.402 | 0.862 | 1.000 | 2.190 | 3.255 | 3.624 | 4.518 | 4.572 | 5.092 | 4.820 |
| 400 | 2.1923 | 0.402 | 0.941 | 1.000 | 1.517 | 2.098 | 1.515 | 2.102 | 1.809 | 2.234 | 2.079 |
| 600 | 3.9815 | 0.402 | 0.993 | 1.000 | 2.085 | 2.791 | 2.764 | 2.694 | 2.379 | 1.855 | 1.308 |
| 999 | 2.9227 | 0.402 | 0.996 | 1.000 | 2.079 | 2.211 | 1.661 | 0.887 | 0.289 | 0.090 | 0.018 |

## 18 Mdust 0.8 = mineral dust (R.V.Martin)

|     |        |       |       |       |       |       |       |       |       |       |       |
|-----|--------|-------|-------|-------|-------|-------|-------|-------|-------|-------|-------|
| 300 | 2.3459 | 0.818 | 0.784 | 1.000 | 2.411 | 3.560 | 4.213 | 5.255 | 5.832 | 6.783 | 7.227 |
| 400 | 2.3417 | 0.818 | 0.907 | 1.000 | 2.223 | 3.180 | 3.372 | 4.151 | 4.298 | 5.044 | 5.206 |
| 600 | 2.4688 | 0.818 | 0.978 | 1.000 | 1.987 | 2.992 | 3.061 | 4.004 | 3.935 | 4.526 | 4.272 |
| 999 | 3.3741 | 0.818 | 0.992 | 1.000 | 1.984 | 2.703 | 2.614 | 2.793 | 2.687 | 2.533 | 2.298 |

## 19 Mdust 1.5 = mineral dust (R.V.Martin)

|     |        |       |       |       |       |       |       |       |       |       |       |
|-----|--------|-------|-------|-------|-------|-------|-------|-------|-------|-------|-------|
| 300 | 2.1925 | 1.491 | 0.694 | 1.000 | 2.582 | 3.893 | 4.901 | 6.101 | 7.097 | 8.288 | 9.215 |
| 400 | 2.2457 | 1.491 | 0.860 | 1.000 | 2.380 | 3.497 | 3.982 | 5.010 | 5.498 | 6.555 | 7.020 |
| 600 | 2.3919 | 1.491 | 0.964 | 1.000 | 2.237 | 3.288 | 3.523 | 4.492 | 4.768 | 5.704 | 5.996 |
| 999 | 2.6314 | 1.491 | 0.980 | 1.000 | 2.133 | 3.236 | 3.499 | 4.489 | 4.582 | 5.171 | 5.055 |

## 20 Mdust 2.5 = mineral dust (R.V.Martin)

|     |        |       |       |       |       |       |       |       |       |       |        |
|-----|--------|-------|-------|-------|-------|-------|-------|-------|-------|-------|--------|
| 300 | 2.1427 | 2.417 | 0.627 | 1.000 | 2.698 | 4.194 | 5.526 | 6.930 | 8.263 | 9.655 | 10.931 |
| 400 | 2.1881 | 2.417 | 0.805 | 1.000 | 2.493 | 3.713 | 4.426 | 5.563 | 6.301 | 7.494 | 8.213  |
| 600 | 2.1559 | 2.417 | 0.944 | 1.000 | 2.293 | 3.361 | 3.606 | 4.583 | 4.849 | 5.859 | 6.157  |
| 999 | 2.3282 | 2.417 | 0.967 | 1.000 | 2.240 | 3.252 | 3.437 | 4.274 | 4.506 | 5.346 | 5.708  |

## 21 Mdust 4.0 = mineral dust (R.V.Martin)

|     |        |       |       |       |       |       |       |       |       |        |        |
|-----|--------|-------|-------|-------|-------|-------|-------|-------|-------|--------|--------|
| 300 | 2.1045 | 3.721 | 0.582 | 1.000 | 2.769 | 4.422 | 5.990 | 7.568 | 9.129 | 10.687 | 12.200 |
| 400 | 2.1191 | 3.721 | 0.742 | 1.000 | 2.580 | 3.887 | 4.812 | 6.027 | 7.005 | 8.295  | 9.268  |
| 600 | 2.2094 | 3.721 | 0.925 | 1.000 | 2.402 | 3.575 | 4.016 | 5.102 | 5.567 | 6.724  | 7.229  |
| 999 | 2.3429 | 3.721 | 0.956 | 1.000 | 2.358 | 3.499 | 3.877 | 4.861 | 5.221 | 6.222  | 6.690  |
