# Supplementary material for: The Framework for 0-D Atmospheric Modeling (F0AM) v3.1
Source: Copernicus journal article supplement (doi:10.5194/gmd-2016-175), 2016-07-08
Supplement: Supplementary file 11 [file gmd-2016-175-supplement.zip]

# Overview of the Framework for 0-D Atmospheric Modeling (F0AM)

---

Version 3, Last Updated 07/05/2016  
Glenn Wolfe, glenn.m.wolfe@nasa.gov

## Table of Contents

|                                                     |    |
|-----------------------------------------------------|----|
| 1. IMPORTANT USAGE INFORMATION .....                | 2  |
| 2. GENERAL OVERVIEW .....                           | 3  |
| 3. METEOROLOGY .....                                | 4  |
| 4. CHEMICAL CONCENTRATIONS .....                    | 5  |
| 5. CHEMISTRY .....                                  | 6  |
| 5.1 THE CHEMFILES INPUT .....                       | 6  |
| 5.2 STRUCTURE OF INDIVIDUAL CHEMISTRY SCRIPTS ..... | 6  |
| 5.3 INTEGRATION OF CHEMICAL EQUATIONS .....         | 7  |
| 5.4 CONSTRUCTION OF MCM REACTIONS FILE .....        | 8  |
| 5.5 AVAILABLE MECHANISMS .....                      | 9  |
| 5.6 PHOTOLYSIS OPTIONS .....                        | 9  |
| 5.7 HETEROGENEOUS CHEMISTRY .....                   | 10 |
| 6. DILUTION .....                                   | 12 |
| 7. MODEL OPTIONS .....                              | 13 |
| 8. SOLAR CYCLE PARAMETERS .....                     | 14 |
| 9. MODEL OUTPUT .....                               | 15 |
| 9. TOOLS .....                                      | 16 |
| 10. PLOTS .....                                     | 17 |
| REFERENCES .....                                    | 18 |

## 1. IMPORTANT USAGE INFORMATION

The Framework for 0-D Atmospheric Modeling (FOAM, yes that is a zero) is exactly what its name implies: a flexible software interface for simulating chemical systems relevant to atmospheric composition. Let's break it down:

*0-D:* The model is designed to simulate processes at a single point in space. You can think of this point as a uniform box, if you prefer. It does NOT explicitly simulate transport or mixing processes. Users should be cognizant of the inherent limitations of a 0-D framework. Recommended reading includes Chapters 3 and 5 of [Jacob's Atmospheric Chemistry](#).

*Atmospheric Modeling:* The user specifies a set of initial conditions (chemical concentrations and meteorology) and a chemical mechanism. The model then predicts how concentrations evolve over time. The results that come out of the model are output, not data. This is an important distinction – model output is effectively an educated guess, and the term “data” should be reserved for observations of a variable or phenomenon in the real world.

*Framework:* The model is designed to accommodate a variety of typical problems, including photochemical chambers and field observations from ground and aircraft. The provided examples show typical setups. It also includes the ability to easily switch between chemical mechanisms.

This model evolved out of the CAFE 1-D canopy model, developed by Glenn Wolfe during his Ph.D. work in Joel Thornton's lab at the University of Washington. It was originally called the University of Washington Chemical Model (UWCM). Since 2011, the model has undergone heavy modifications. Recognizing that the apple has gone far from the tree, the model was renamed to FOAM in 2016.

This document briefly describes the overall structure and implementation of the code. If you are not familiar with MATLAB: just dive in! Study the example setups, and make copious use of the help window. If you use the model for a publication, please reference the following paper:

**Wolfe, G. M., et al., The Framework for 0-D Atmospheric Modeling (FOAM), in preparation, 2016.**

In addition, you should provide the appropriate reference for the chemical mechanism used.

Please contact Glenn ([glenn.m.wolfe@nasa.gov](mailto:glenn.m.wolfe@nasa.gov)) with any comments or questions. Users are also encouraged to let Glenn know of any published papers using the model and to join the user group mailing list ([FOAMusers@googlegroups.com](mailto:FOAMusers@googlegroups.com)). This is a community tool, so if you produce any code over the course of your work that others might find useful, please share it.

## 2. GENERAL OVERVIEW

The following subdirectories are included in the main folder. All folders and subfolders must be added to the MATLAB search path. If you are unfamiliar with how to do this, go to the MATLAB help window and search for “changing the search path.”

|                |                                                                 |
|----------------|-----------------------------------------------------------------|
| <b>Setups:</b> | Model setup scripts, including the examples.                    |
| <b>Tools:</b>  | Scripts for manipulating UWCM output.                           |
| <b>Plots:</b>  | Scripts for plotting model output.                              |
| <b>Chem:</b>   | Chemical mechanisms, photolysis code                            |
| <b>Docs:</b>   | Documentation and tutorials                                     |
| <b>Runs:</b>   | Default folder for saving model output in dated sub-directories |
| <b>Core:</b>   | Core scripts and functions for the model.                       |

Model runs are executed with the following function call:

```
S = FOAM_ModelCore (Met, InitConc, ChemFiles, BkgdConc, ModelOptions, SolarParam);
```

### INPUTS:

|                      |                                                                         |
|----------------------|-------------------------------------------------------------------------|
| <b>Met:</b>          | Meteorological variables (2-column cell array)                          |
| <b>InitConc:</b>     | Initial chemical concentrations (3-column cell array)                   |
| <b>ChemFiles:</b>    | Names of all chemistry sub-mechanisms (cell array)                      |
| <b>BkgdConc:</b>     | Background chemical concentrations for dilution (2-column cell array)   |
| <b>ModelOptions:</b> | Parameters for model execution and output (structure array)             |
| <b>SolarParam:</b>   | (optional) Parameters for running in solar cycle mode (structure array) |

OUTPUT is given as a structure, described later.

Input and output variables are described in detail below. New users are encouraged to look at the example setups (under \Setups\Examples), which include a range of typical model uses.

**ExampleSetup\_Chamber**  
**ExampleSetup\_DielCycle**  
**ExampleSetup\_FlightSS**  
**ExampleSetup\_MechCompare**

**NOTE ON TERMINOLOGY:** A model *run* refers to a single model call, while a model *step* refers to model execution for a single set of initial meteorological and chemical conditions. There can be multiple *steps* within a *run*.

**NOTE ON INPUT REPLICATION:** Most of the inputs in Met and InitConc can be specified as either a scalar or a 1-D column array. All variables specified as arrays must be of the same length; this length determines the number of model steps. Any variables specified as scalars will be assumed to be the same for all model steps.

### 3. METEOROLOGY

**Met** is a 2-column cell array containing all meteorological inputs. The first column contains variable names, while the second column contains values. The user must specify pressure and temperature; other variables are optional and setup-dependent.

#### Basic Meteorology

**P:** Pressure (mbar). Required input.  
**T:** Temperature (K). Required input.  
**H2O:** Water vapor number density (molec cm<sup>-3</sup>). Takes priority over RH if both specified.  
**RH:** Relative humidity (%). Only needed if H2O is not specified. *DEFAULT: 50%.*

#### Radiation-Related

**SZA:** Solar zenith angle (0 – 90 degrees). Not required if **LFlux** or **SolarParam** are specified.  
*DEFAULT: 0 degrees.*

**LFlux:** Name of a text file containing a radiation spectrum (actinic flux vs wavelength). Only needed if you wish to calculate J-values with this spectrum. The text file should have no headers and two columns: wavelength (nm) and photon flux (photons/cm<sup>2</sup>/s/nm). See \Setups\Examples\ExampleLightFlux.txt for an example. See “Photolysis Options” section below for more info. *DEFAULT: empty.*

**J[n]:** Measured J-values (s<sup>-1</sup>), used to overwrite the default parameterized values. The variable name is specific to the utilized chemistry scheme (e.g., the NO<sub>2</sub> photolysis frequency is **J4** in MCM and **JNO2** in CB05). Use one row for each variable.

**jcorr:** Correction factor used to scale all J-values that are not explicitly input. This can be

- 1) a numeric scalar or array with values >0
- 2) a string specifying the name of an input J-value, e.g. ‘J4’
- 3) a cell array of strings of multiple input J-values, e.g. {‘J4’, ‘J1’}

In the second case, a correction factor will be derived by taking the ratio of the observed/calculated J-value. The same is true in the third case, except jcorr is the average of correction factors for all specified inputs. *DEFAULT: 1.*

**ALT:** Altitude, m. Identical to (though separate from) the “alt” input field in SolarParam. Only used if the “HYBRID” J-value method is selected. *DEFAULT: 500 m.*

**O3col:** Overhead ozone column, DU. Only used if “HYBRID” J-value method is selected.  
*DEFAULT: 300 DU (typical of mid-latitudes).*

**albedo:** Surface reflectance, unitless (range 0-1). Only used if “HYBRID” J-value method selected.  
*DEFAULT: 0.1 (typical of vegetated surfaces).*

#### Other Parameters

**kdil:** First-order rate constant for dilution (s<sup>-1</sup>). *DEFAULT: 0.*

#### Useful functions (located in \Tools\):

**ConvertHumidity:** Converts between standard representations of atmospheric water vapor content.

**sun\_position:** Calculates SZA based on date, time and location coordinates.

**ReplaceNaN:** Replaces NaNs in a matrix with linear interpolations (between rows). This is handy if your observational data has holes but should be used with due caution.

**ScaleData:** Linearly scales a vector to new a new range. Useful if, for example, you want a dilution rate constant that is scaled to wind speed or boundary layer height.

## 4. CHEMICAL CONCENTRATIONS

**InitConc** is a 3-column cell array containing information for all initial concentrations. All species not specified here will have a starting concentration of 0.

First column: Species names. These must be the same as those found in the chemical mechanisms.

Second column: Chemical mixing ratios *in parts per billion (ppb)*.

Third column: This is a scalar flag, **HoldMe**, specifying how constraints are handled for each model step.

1 – Hold constant throughout model step.

0 – Initialize but do not hold constant. Behavior depends on value of **ModelOption.LinkSteps**:

LinkSteps = 0: Initialize at beginning of each model step.

LinkSteps = 1: Initialize at beginning of first step only.

Useful functions (located in \Tools\):

**NumberDensity:** Calculates atmospheric number density at a given T and P. Useful for converting between concentration ( $\text{molec}/\text{cm}^3$ ) and mixing ratio.

**ReplaceNaN:** replaces NaNs in a matrix with linear interpolations (between rows). This is handy if your observational data has holes but should be used with due caution.

**DataCleaner:** Like ReplaceNaN but on steroids. Provides more options for filling in gaps (nans and/or negatives) with interpolation, mean, median, etc.

## 5. CHEMISTRY

### 5.1 THE CHEMFILES INPUT

**ChemFiles** is a cell array of strings specifying functions and scripts for the chemical mechanism. The first and second cells are always functions for generic/complex rate constants and J-values, respectively. Subsequent cells are scripts for mechanisms and sub-mechanisms. For an MCM scheme, the input might look as follows:

```
ChemFiles = {...  
    'MCMv331_K(Met)';...  
    'MCMv331_J(Met,0)';...  
    'MCMv331_Inorg_Isoprene'};
```

The output of the K and J functions must be a structure containing all calculated rate constants/J values. If, for some bizarre reason, your mechanism does not have functions for K's and J's, either or both of the first two cells can be empty. Available mechanisms are listed below.

### 5.2 STRUCTURE OF INDIVIDUAL CHEMISTRY SCRIPTS

Each chemistry script has two main sections: species names and chemical reactions.

#### Species Names

This section is where all chemical species and RO<sub>2</sub> names are specified. These are given as cell arrays of strings and added to the relevant lists by calling the script **AddSpecies**. For example, for a mechanism involving oxidation of methane:

```
SpeciesToAdd = {'CH4'; 'CH3O2'; 'CH3OOH'; 'HCHO'; 'OH'; 'HO2'; 'NO'; 'NO2'};  
RO2ToAdd = {'CH3O2'};  
AddSpecies
```

A few notes on this:

- **RO2ToAdd** is optional and only necessary for mechanisms that use total peroxy radicals as an operator (like MCM). In such a case, all RO<sub>2</sub> species must be included in *both* the **CnamesToAdd** and **RO2ToAdd** cell arrays.
- Generally, it is good practice to give the names of *all* reactants and products included in the sub-mechanism. However, this section can be omitted if the mechanism will only be used in conjunction with another mechanism that includes all reactant/products.
- The same species can be added in multiple sub-mechanisms without fear of generating duplicate species.

## Chemical Reactions

This section contains blocks of code for chemical reactions. Each block has the following structure.

```
i=i+1;  
Rnames{i} = 'CH4 + OH = CH3O2';  
k(:,i) = 1.85e-12.*exp(-1690./T);  
Gstr{i,1} = 'CH4'; Gstr{i,2} = 'OH';  
fCH4(i) = -1; fOH(i) = -1; fCH3O2(i) = 1;
```

**Rnames:** A string specifying the name of the reaction

**k:** Reaction rate constant. Note that this will be a column vector if multiple initial conditions are given, hence the use of vectorized operators (.\*, ./ and .^).

**Gstr:** 2-column cell array of strings specifying reactant names. If the reaction is 1<sup>st</sup> or 0<sup>th</sup> order, one or both of the Gstr columns can be left blank. Yes, it is short for “G-string.” Giggle if you must.

**fX:** Stoichiometric constants for each species for a given reaction. In the above example, one molecule each of CH<sub>4</sub> and OH are lost and 1 molecule of CH<sub>3</sub>O<sub>2</sub> is formed, thus the respective fX are -1, -1 and 1. fX for all species not participating in the reaction are 0 by default.

### Additional Notes:

- ORDER: The order in which reactions are entered does not matter.
- DUPLICATE REACTIONS: If duplicate reactions are found, a warning will appear in the command window during model initialization, but the model will still run. These do occur in the MCM, typically involving two separate but numerically-identical photolysis reactions. In general, however, duplicate reactions should not be present.
- All **Met** variables and generic rate constants/photolysis frequencies (as specified in ChemFiles input functions) can be used when constructing reactions.

## 5.3 INTEGRATION OF CHEMICAL EQUATIONS

**ModelOptions.IntTime** specifies the length of time to integrate each model step. The model uses MATLAB's ode15s solver, which is specifically designed for stiff systems. Initial concentrations for each step are set to 0 molec cm<sup>-3</sup> unless otherwise specified in **InitConc**. To see how the chemical rates are evaluated, the user is invited to look at **dydt\_eval** in \Core\. In a nutshell:

1. The index **iG** (which is generated using **Gstr**) is used to calculate the matrix **G**, which is the product of reactant concentrations for each reaction;
2. Multiplication of **G** by rate constants, **k**, gives the rate for each reaction;

3. Multiplication of the rates by **f** gives the net rate of change for each species. This last line is a matrix multiplication, so it is actually a two-step process: multiplication of each rate by the stoichiometric coefficients, and summation of these weighted rates across all reactions for each species.

In mathematical terms, for any species X,

$$\frac{d[X]}{dt} = \sum_{i=1}^{\# \text{ Rxs}} f_i^X k_i G_i$$

## 5.4 CONSTRUCTION OF MCM REACTIONS FILE

The full version of the MCM, as well as a few subsets, are included with the examples under \Chem\MCMv331\. In many cases, however, a user will only have constraints for a subset of all VOC. For computational efficiency, it is recommended that users generate their own MCM subsets in these cases. Here's how.

- 1) Go to the MCM website (<http://mcm.leeds.ac.uk/MCM/>).
- 2) Near the top, click "Browse."
- 3) Check all species that you want to include and click the "Add Selection to Mark List" button.
- 4) Near the top, click "Extract."
- 5) Select "FACSIMILE input format." Also, check the "Include inorganic reactions?" box.
- 6) Click the "Extract" button to download the mechanism subset to a text file (mcm\_subset .fac).
- 7) Give this file a more descriptive name and move it to somewhere on your MATLAB search path (e.g. F0\Chem\MCMv331).
- 8) In the MATLAB command window, call the **FAC2FOAM** function:

`FAC2FOAM(MCM_flnm, save_flnm)`

Here, **MCM\_flnm** is the name of the FACSIMILE text file (including extension) and **save\_flnm** is the desired name for the script that will be written. This will generate the sub-mechanism as a script (.m file) in the same directory as the text file. **FAC2FOAM** has been tested with the entire MCM reaction set, but it may fail for other FACSIMILE-formatted mechanisms. Some translation code for KPP-formatted mechanisms is also available on request, though it may need some tinkering.

DO NOT USE MULTIPLE MCM-EXTRACTED MECHANISMS SIMULTANEOUSLY! This will lead to duplicate reactions.

MODIFICATIONS TO MCM REACTIONS: It is highly recommended that users save a separate script—with a different name—if any modifications are made to the base MCM mechanism (e.g. changes to rate constants or product yields). This will help reduce confusion when performing multiple model experiments. Additional reactions are best added to **ChemFiles** as sub-mechanisms (see below).



## 5.5 AVAILABLE MECHANISMS

The below table lists currently-available chemical mechanisms and sub-mechanisms, which can be found in the \Chem\ folder. These folders also contain relevant documentation. If users create more such mechanisms in the course of their work, they are encouraged to share with the community.

| Mechanism        | Chemistry                                                                                                                                                                          | Generic K function | J-value function(s)      |
|------------------|------------------------------------------------------------------------------------------------------------------------------------------------------------------------------------|--------------------|--------------------------|
| <b>MCMv3.3.1</b> | MCMv331_AllRxns<br>MCMv331_Inorg_Isoprene<br>custom subsets (see above)<br><u>Sub-mechanisms</u><br>CH4_O1D<br>CH3ONO_hv<br>Cl_VOC_Riedel2014<br>Halogens_MECCA<br>MTSQT_Wolfe2011 | MCMv331_K(Met)     | MCMv331_J(Met, Jmethod)  |
| <b>MCMv3.2</b>   | MCMv32_Inorg_Isoprene<br>custom subsets (see above)                                                                                                                                | MCMv32_K(Met)      | MCMv32_J(Met, Jmethod)   |
| <b>CB05</b>      | CB05_AllRxns                                                                                                                                                                       | CB05_K(Met)        | CB05_J(Met, Jmethod)     |
| <b>CB6r2</b>     | CB6r2_AllRxns                                                                                                                                                                      | CB6r2_K(Met)       | CB6r2_J(Met, Jmethod)    |
| <b>RACM2</b>     | RACM2_AllRxns                                                                                                                                                                      | RACM2_K(Met)       | RACM2_J(Met, Jmethod)    |
| <b>GEOS-CHEM</b> | GEOSCHEM_AllRxns                                                                                                                                                                   | GEOSCHEM_K(Met)    | GEOSCHEM_J(Met, Jmethod) |

## 5.6 PHOTOLYSIS OPTIONS

Several options exist for deriving J-values, depending on your setup and preference. All options are contained in the J-value functions of each mechanism and are selected with the “Jmethod” input. Jmethod is can be a string or scalar, and options are ‘MCM’, ‘BOTTOMUP’, OR ‘HYBRID’ (corresponding to 0, 1 and 2 if given as a scalar). The default is ‘MCM’.

IMPORTANT NOTE! When modeling field observations, it is always highly preferable to scale model-calculated J-values to an observed J-value using the jcorr input. The radiation models underlying the MCM and HYBRID methods represent “typical” tropospheric conditions but do not reflect variability in overhead ozone column, surface albedo, aerosol optical depth, clouds, solar flares, etc., all of which affect the radiation field.

**MCM:** This is the trigonometric SZA function found in MCM. The actual function is

$$J = I * \cos(SZA)^m * \exp(-n * \sec(SZA)).$$

Here,  $I/m/n$  are constants derived from least-squares fits to J-values derived from a radiative transfer model run at 0.5 km and literature cross sections/quantum yields. The origin of the parameterization is discussed in Jenkin et al. (1997). As of MCMv3.3.1, there seems to be substantial differences between this parameterization and values calculated from the NCAR TUV radiation model. See `\Chem\Photolysis\PhotoDataSources.xlsx` for a comparison. Some mechanisms include photolysis reactions that are not found in MCM. For such reactions, HYBRID values are used instead, with a fixed altitude of 0.5km to match the MCM assumption, and O3 column of 350 DU and albedo of 0.01 to optimize agreement between MCM and HYBRID J-values.

**BOTTOMUP:** J-values are calculated from scratch by integrating a user-specified actinic flux spectrum (as specified in the Met.LFlux input) and literature-derived cross sections and quantum yields. Cross sections and quantum yields are contained in the `\Chem\Photolysis` folder, and the spreadsheet **PhotoDataSources.xlsx** documents their origin, last update, and translations into various mechanisms. This is the same as the “ChamberPhoto” option from earlier versions of UWCM.

**HYBRID:** J-values are calculated as a function of SZA, altitude, O3 column and albedo using lookup tables. The lookup tables are calculated using solar spectra from the NCAR TUV v5.2 radiation model (available online) and the same literature cross sections/quantum yields used in the BOTTOMUP method. TUV setup included the following parameters:

|            |                                                                                 |         |
|------------|---------------------------------------------------------------------------------|---------|
| SZA        | 0:5:90                                                                          | degrees |
| Altitude   | 0:1:15                                                                          | km      |
| O3 column  | 100:50:600                                                                      | DU      |
| albedo     | 0:0.2:1                                                                         |         |
| ground Alt | 0                                                                               | km      |
| AOD        | 0.235                                                                           |         |
| T, P       | US Standard Atmosphere (288.15 K and 1013 mbar at surface, 9.8 K/km lapse rate) |         |

This method was designed as a compromise between the MCM parameterization (which is incomplete when paired with other mechanisms and optimized for surface conditions) and running the full TUV model inline (which is computationally expensive, and not easy to modify for those not comfortable with FORTRAN). Also, it is fully documented and fairly easy to modify. Actinic fluxes and code for generating the lookup tables are available upon request. The **PhotoDataSources.xlsx** spreadsheet documents sources for all photolytic data and also shows a comparison of the HYBRID output against both TUVv5.2 and MCM. Most of the differences are due to choices: JPL vs. IUPAC recommendations, wavelength ranges, etc. Users are encouraged to verify data on reactions relevant to their work.

## 5.7 HETEROGENEOUS CHEMISTRY

Currently, none of the mechanisms in FOAM include heterogeneous chemistry. There is an example reaction showing how this could be done in the `\Chem\Aerosol` folder. Theoretically, this could be expanded to include all species of interest, and additional inputs could be added to Met (aerosol surface

area, speciation, size distribution, etc.). Maybe, someday, someone will think this sufficiently important to invest the time needed to write a good mechanism. Maybe that someone is you, dear reader.

## 6. DILUTION

Dilution is parameterized following the simple functional form

$$\frac{d[X]}{dt} = k_{dil}([X]_b - [X])$$

Where  $k_{dil}$  is a 1<sup>st</sup>-order dilution rate constant and  $[X]_b$  is a fixed background concentration. Note that this is equivalent to a 0<sup>th</sup>-order source ( $k_{dil}[X]_b$ ) and a 1<sup>st</sup>-order sink ( $-k_{dil}[X]$ ). More information on this parameterization, including possible methods of determining  $k_{dil}$ , can be found elsewhere (Dillon et al., 2002; Wolfe and Thornton, 2011).

**kdil** is specified as a parameter in **Met**. Setting this to 0 will negate dilution.

**BkgdConc** is a 2-column cell array that determines background concentrations. The first column gives species names and the second give values, analogous to **InitConc**. The first row must contain the name 'DEFAULT' and a value of 0 or 1, which determines the default concentration for non-specified species. Setting this to 0 assumes concentrations of 0, while setting it to 1 assumes background concentrations equal to those found in **InitConc** (and 0 for those not in **InitConc**).

This scheme is a dramatic simplification of a complex physical process, and effectively encompasses all physical sinks (e.g. deposition, entrainment, etc). Most 0-D box models include an additional 24-hour lifetime for all species to keep secondary species from building up to unreasonable levels. This can be achieved here by setting **kdil** = 1/86400s and setting the DEFAULT in **BkgdConc** to 0.

## 7. MODEL OPTIONS

**ModelOptions** is a structure containing any of the following fields, which affect model execution and output handling.

- IntTime:** Integration time for each step in seconds. Required input.
- LinkSteps:** Flag for using end concentrations from one step to initialize the next step (0 or 1, default = 0). Note that this behavior is superseded for any species that have **HoldMe=1** in **InitConc**.
- Repeat:** Number of times to cycle through all constraints (default = 1). Useful, for example, if you want to spin up the concentration of unconstrained, medium-to-long-lived species. Only useful if **LinkSteps = 1** (e.g. for a diel cycle at a ground site).
- FixNOx:** Flag for scaling *total* NOx to constraints (0 or 1, default = 0). In this calculation, model NO and NO<sub>2</sub> are scaled so that their sum matches the sum of input NO+NO<sub>2</sub>. This provides a means of supplying NOx without perturbing the model NO/NO<sub>2</sub> ratio. To use this, constraints for both NO and NO<sub>2</sub> must be specified in **InitConc** with their **HoldMe** flags set to 0. Only useful if **LinkSteps = 1** or in Solar Cycle mode. The scaling is done at each step (or mini-step in Solar Cycle mode). It is NOT the same as holding total NOx constant throughout a model step, which is really hard.
- Verbose:** Flag for displaying verbose model execution information in command window, including progress and run times (0,1,2, or 3, default = 0).
- EndPointsOnly:** Flag for whether to output concentrations for entire model step integration period (0, default) or last point of each step only (1).
- TimeStamp:** Vector of times for initial conditions. This will overwrite the model output variable **Time**. Useful if you are modeling a time series of observations and want the same time base for both model and observations.
- SavePath:** Path for saving output. Multiple options here:
- 1) A full path including extension, e.g. 'C:\CoolScience\MyResults.mat'.
  - 2) A directory, e.g. 'C:\CoolScience\'. A dated directory will be created in the directory (format YYYYMMDD). A save file will be created in this directory with a name of YYYYMMDD\_##.mat, where ## is incremented (starting at 01).
  - 3) A filename, e.g. 'MyResults.mat'. Output is saved with this filename in the \Runs\ directory.
  - 4) If left empty or unspecified, the default save path is \Runs\YYYYMMDD\YYYYMMDD\_##.mat.
  - 5) Set to "DoNotSave" to not save output. Obviously.
- DeclareVictory:** Set it to 1 and see what happens. Make sure your speakers are on. Useful for difficult modeling problems.

## 8. SOLAR CYCLE PARAMETERS

**SolarParam** is a structure containing information needed to run the model in a “solar cycle” mode. In this configuration, the model will allow SZA, and thus photolysis frequencies, to evolve in “real time” over the course of a model step (basically by taking mini-steps and updating SZA). This type of setup is typically employed for steady-state simulations along a flight transect. **SolarParam** is an optional input for calling the model, but if it is used then all fields are required. The first four fields should have the same length as the number of inputs in **Met** and **InitConc**.

|                   |                                                                                                                                                              |
|-------------------|--------------------------------------------------------------------------------------------------------------------------------------------------------------|
| <b>lat:</b>       | Latitude, degrees (-90 to 90). North of the equator is positive.                                                                                             |
| <b>lon:</b>       | Longitude, degrees (-180 to 180). East of the meridian is positive.                                                                                          |
| <b>alt:</b>       | Altitude, meters above sea level.                                                                                                                            |
| <b>startTime:</b> | 6-column matrix of start times in Universal time (UTC). Columns are [year month day hour min sec]. This format is the same as MATLAB’s “date vector” format. |
| <b>nDays:</b>     | Number of days to loop through solar cycle. Specified as a scalar.                                                                                           |

Note that the **ModelOptions.EndPointsOnly** input has special behavior in the case of a solar cycle run:

**ModelOptions.EndPointsOnly=1:** output last point at end of step.

**ModelOptions.EndPointsOnly=0:** output end points at intervals of **ModelOptions.IntTime** (e.g. at the end of each min-step) along the model step. In other words, output the whole diurnal cycle.

NOTE REGARDING EXECUTION TIME: a diurnal cycle will end on the same hour it began. So, a run with **SolarParam.nDays=1** and **ModelOptions.IntTime=3600** spans 24 hours but will actually have 25 model points. If you like, you can think of the first mini-step as a spin-up.

## 9. MODEL OUTPUT

Model output is a structure that contains all of the relevant model parameters and results. This output is saved automatically to a location that depends on the **ModelOptions.SavePath** input.

The below table describes the various variable in the output structure S.

| Name                       | Type             | Description                                                                                                                                     | Dimension <sup>a</sup> |
|----------------------------|------------------|-------------------------------------------------------------------------------------------------------------------------------------------------|------------------------|
| <b>Met</b>                 | Structure        | Meteorological constraints                                                                                                                      | nlp x 1                |
| <b>Met.jcorr</b>           | Numerical Array  | Default J-value correction factor                                                                                                               | nlp x 1                |
| <b>Met.jcorr_all</b>       | Numerical Matrix | Correction factors for all J-values                                                                                                             | nlp x nJ               |
| <b>InitConc</b>            | Structure        | Initial/constraint concentrations (ppb)                                                                                                         | nlp x 1                |
| <b>BkgdConc</b>            | Structure        | Background concentrations (ppb)                                                                                                                 | nlp x 1                |
| <b>ModelOptions</b>        | Structure        | Model options                                                                                                                                   | Varies                 |
| <b>SolarParam</b>          | Structure        | Solar cycle parameters                                                                                                                          | Varies                 |
| <b>SolarParam.SZAcycle</b> | Numerical Array  | SZA for each mini-step along all solar cycles                                                                                                   | nSC x 1                |
| <b>Cnames</b>              | Cell Array       | Species names                                                                                                                                   | nSp x 1                |
| <b>Conc</b>                | Structure        | Modeled concentrations (ppb)                                                                                                                    | nOp x 1                |
| <b>Time</b>                | Numerical Array  | Model time (seconds, unless overwritten by ModelOptions.TimeStamp)                                                                              | nOp x 1                |
| <b>StepIndex</b>           | Numerical Array  | Integer index for model step                                                                                                                    | nOp x 1                |
| <b>ReplIndex</b>           | Numerical Array  | Integer index for model repetition cycle                                                                                                        | nOp x 1                |
| <b>iRO2</b>                | Numerical Array  | Integer index for location of RO2 species in Cnames                                                                                             | Varies                 |
| <b>Chem</b>                | Structure        | Chemistry parameters                                                                                                                            | Varies                 |
| <b>Chem.ChemFiles</b>      | Cell Array       | Chemistry sub-mechanism names                                                                                                                   | Varies                 |
| <b>Chem.Rnames</b>         | Cell Array       | Reaction names                                                                                                                                  | nRx x 1                |
| <b>Chem.Rates</b>          | Numerical Array  | Reaction rates (ppb/s)                                                                                                                          | nOp x nRx              |
| <b>Chem.f</b>              | Sparse Matrix    | Stoichiometric coefficients                                                                                                                     | nRx x nSp              |
| <b>Chem.iG</b>             | Numerical Array  | Integer index for location of reactants                                                                                                         | nRx x 2                |
| <b>Chem.k</b>              | Numerical Array  | Reaction rate constants (1 <sup>st</sup> order: s <sup>-1</sup> ; 2 <sup>nd</sup> order: cm <sup>3</sup> molec <sup>-1</sup> s <sup>-1</sup> ). | nlp x nRx              |
| <b>Chem.iHold</b>          | Numerical Array  | Integer index for species in Cnames held constant                                                                                               | Varies                 |
| <b>Chem.DilRates</b>       | Structure        | Dilution rates for each species (ppb/s)                                                                                                         | nOp x 1                |

<sup>a</sup>nSp = number of species

nRx = number of reactions

nOp = number of output points

nlp = number of input constraints

nJ = number of J-values

nSC = number of solar cycle mini-steps (nlp\*SolarParam.nDays\*ModelOptions.IntTime/(86400 sec/day))

## 9. TOOLS

The \Tools\ folder contains functions that are useful for manipulating input and output. For more info on these, see the help sections at the top of each function.

| Function               | Description                                                                                                                                                                                                                                                                                                                                                                                                    |
|------------------------|----------------------------------------------------------------------------------------------------------------------------------------------------------------------------------------------------------------------------------------------------------------------------------------------------------------------------------------------------------------------------------------------------------------|
| <b>breakout</b>        | Converts from a cell array/matrix pair of names/values to a structure of individual variables. Each column in the matrix is assumed to correspond to a variable name. If no output argument is assigned, variables will be written to the caller workspace.                                                                                                                                                    |
| <b>breakin</b>         | Converts from a structure of variables (such as the <b>InitConc</b> output) to a cell array/matrix pair that contains the names and values of each variable. In the matrix, each column is a variable.                                                                                                                                                                                                         |
| <b>ConvertHumidity</b> | Converts between various units for water vapor content.                                                                                                                                                                                                                                                                                                                                                        |
| <b>DataCleaner</b>     | Perform various cleaning operations on a dataset to remove or replace NaNs and negatives. The output dataset should be appropriate for input into a box model.                                                                                                                                                                                                                                                 |
| <b>ExtractRates</b>    | Isolate and sort all reaction rates for a chemical species.                                                                                                                                                                                                                                                                                                                                                    |
| <b>ExtractSpecies</b>  | Grab and sort a subset of chemical species concentrations. Input can be either a cell array of species names or an index (such as <b>iRO2</b> ).                                                                                                                                                                                                                                                               |
| <b>IndexEQ</b>         | Creates a 2-column index specifying the location of all equilibrium reactions.                                                                                                                                                                                                                                                                                                                                 |
| <b>IndexNOy</b>        | Creates an index for all reactive N species. Meant for MCM; not perfect.                                                                                                                                                                                                                                                                                                                                       |
| <b>lifetime</b>        | Calculates total chemical lifetime of a model species.                                                                                                                                                                                                                                                                                                                                                         |
| <b>NumberDensity</b>   | Calculates atmospheric number density at a given temperature and pressure.                                                                                                                                                                                                                                                                                                                                     |
| <b>ReplaceNaN</b>      | Replace NaNs in a vector with linear interpolation of nearest non-NaN points.                                                                                                                                                                                                                                                                                                                                  |
| <b>Rparts</b>          | Takes a cell array of reaction names and breaks them apart into cell arrays of reactant and product names.                                                                                                                                                                                                                                                                                                     |
| <b>Run2Init</b>        | Generates model initial conditions (Met and InitConc) from a subset of model results. Useful if you want to use results from one run to initialize another run.                                                                                                                                                                                                                                                |
| <b>ScaleData</b>       | Applies a linear scaling to an array.                                                                                                                                                                                                                                                                                                                                                                          |
| <b>SplitRun</b>        | Splits a model output structure into a series of new structures containing results from individual steps or repetitions within the run. Also includes the option for a user-specified custom index to split results.                                                                                                                                                                                           |
| <b>struct2var</b>      | Extracts fields from a structure and reassigns them as variables in caller workspace.                                                                                                                                                                                                                                                                                                                          |
| <b>sun_position</b>    | Calculates solar zenith and azimuth angle for the Earth at any time/location.                                                                                                                                                                                                                                                                                                                                  |
| <b>SMILES (folder)</b> | SMILES (simplified molecular input line-entry system) is a way to represent molecules with ASCII strings This folder contains an experimental function, <b>SearchSMILES</b> , to identify MCM species with specific functionalities using SMILES strings, returning their names, molecular weights and atom counts. This function has not been rigorously tested, but most of the patterns should be captured. |



## 10. PLOTS

The \Plots\ folder contains a handful of functions for generating common plots of model output.

| Function              | Description                                                                                                                                                             |
|-----------------------|-------------------------------------------------------------------------------------------------------------------------------------------------------------------------|
| <b>PlotConc</b>       | Plots time series of a species or an arithmetic combination of species (e.g. NO/NO <sub>2</sub> ). Can accept multiple model structure inputs.                          |
| <b>PlotConcGroup</b>  | Plots time series of a group of species for a single model run. Useful for, e.g., looking at the distribution of RO <sub>2</sub> or NO <sub>y</sub> .                   |
| <b>PlotRates</b>      | Plots time series of production and loss rates for a single species and a single model run.                                                                             |
| <b>PlotRatesAvg</b>   | Plots production and loss rates averaged over some subset of outputs.                                                                                                   |
| <b>PlotReactivity</b> | Plots time series speciated reactivity, which is the inverse lifetime of a species. Useful for, e.g., plotting OH reactivity. Requires some unique user-defined inputs. |
| <b>PlotYield</b>      | Calculates and plots the yield of a product from the oxidation of a reactant. Typically used for looking at chamber experiments.                                        |
| <b>purtyPlot</b>      | User-preferred settings for plot decorations                                                                                                                            |
| <b>fillcolors.mat</b> | 3-column RGB matrix for colors used in multi-species plotting                                                                                                           |

All plot functions will also return the plotted variables if an output variable is assigned when calling the function. Also, all of these functions accept several options, which are input as name-value pairs. The specific options supported depends on the function; see comments in each function for full details. Options shared across most functions are listed below.

PlotFun(...,'ptype',value): Indicates type of plot. Values vary depending on function.

PlotFun(...,'unit',value): Specify the unit.

PlotFun(...,'scale',value): specify a scalar multiplier. For functions that plot groups of things, setting this to 0 causes normalization by the sum of the group.

## REFERENCES

- Dillon, M. B., Lamanna, M. S., Schade, G. W., Goldstein, A., and Cohen, R. C.: Chemical evolution of the Sacramento urban plume: Transport and oxidation, *J. Geophys. Res.*, 107, 4045, 2002.
- Jenkin, M. E., Saunders, S. M., and Pilling, M. J.: The tropospheric degradation of volatile organic compounds: A protocol for mechanism development, *Atmos. Env.*, 31, 81-104, 1997.
- Wolfe, G. M. and Thornton, J. A.: The Chemistry of Atmosphere-Forest Exchange (CAFE) Model - Part 1: Model Description and Characterization, *Atmos. Chem. Phys.*, 11, 77-101, 2011.
