# Supplementary material for: The Framework for 0-D Atmospheric Modeling (F0AM) v3.1
Source: Copernicus journal article supplement (doi:10.5194/gmd-2016-175), 2016-07-08
Supplement: Supplementary file 12 [file gmd-2016-175-supplement.zip]

Supplemental Information for  
The Regional Atmospheric Chemistry Mechanism,  
Version 2

Wendy S. Goliff<sup>1</sup>, William R. Stockwell<sup>2\*</sup> and Charlene V. Lawson<sup>2</sup>

<sup>1</sup>College of Engineering Center for Environmental Research and Technology, University of California,  
Riverside

<sup>2</sup>Howard University, Department of Chemistry, Washington, DC

## Contents

|                                                                                                              |    |
|--------------------------------------------------------------------------------------------------------------|----|
| Table S1. RACM2 species list.....                                                                            | 2  |
| Table S2a. The RACM2 Chemical Mechanism: Photolysis Reactions.....                                           | 8  |
| Table S2b. The RACM2 Chemical Mechanism, Thermal Reactions.....                                              | 10 |
| Table S2c. The RACM2 Chemical Mechanism: Reaction Rate Constants of the Form<br>$k = T^2 C \exp(-D/T)$ ..... | 36 |
| Table S2d. The RACM2 Chemical Mechanism: Troe Reaction Parameters .....                                      | 36 |
| Table S2e. The RACM2 Chemical Mechanism: Troe Equilibrium Reactions.....                                     | 37 |
| Table S2f. The RACM2 Chemical Mechanism: Reactions With Special Rate Expressions.....                        | 37 |
| Comparison of RACM1 and RACM2 Mechanisms for “Real Atmosphere” Cases.....                                    | 39 |

**Table S1. RACM2 species list.**

| Species | Definition           | Carbon # | MW  | Species | Definition                                                   | Carbon # | MW  |
|---------|----------------------|----------|-----|---------|--------------------------------------------------------------|----------|-----|
| CO      | Carbon monoxide      | 1        | 28  | ACD     | Acetaldehyde                                                 | 2        | 44  |
| CO2     | Carbon dioxide       | 1        | 44  | ACE     | Acetylene                                                    | 2        | 26  |
| H2      | Hydrogen             |          | 2   | ACO3    | Acetyl peroxy radicals                                       | 2        | 75  |
| H2O     | Water                |          | 18  | ACT     | acetone                                                      | 3        | 58  |
| H2O2    | Hydrogen peroxide    |          | 34  | ACTP    | Peroxy radicals formed from ACT                              | 3        | 89  |
| HNO3    | Nitric acid          |          | 63  | ADCN    | Aromatic-NO3 adduct from PHEN                                | 6        | 156 |
| HNO4    | Pernitric acid       |          | 79  | ADDC    | Aromatic-HO adduct from CSL                                  | 7        | 125 |
| HO      | Hydroxy radical      |          | 17  | ALD     | C3 and higher aldehydes                                      | 3        | 58  |
| HO2     | Hydroperoxy radical  |          | 33  | API     | Alpha-pinenes and other cyclic terpenes with one double bond | 10       | 136 |
| HONO    | Nitrous acid         |          | 47  | APIP    | Peroxy radicals formed from API                              | 10       | 185 |
| N2      | Nitrogen             |          | 28  | BALD    | Benzaldehyde and other aromatic aldehydes                    | 7        | 106 |
| N2O5    | Dinitrogen pentoxide |          | 108 | BALP    | Peroxy radicals formed from BALD                             | 7        | 137 |
| NO      | Nitric oxide         |          | 30  | BAL1    | Peroxy radicals formed from BALD                             | 7        | 121 |
| NO2     | Nitrogen dioxide     |          | 46  | BAL2    | Peroxy radicals formed from BALD                             | 7        | 105 |
| NO3     | Nitrogen trioxide    |          | 62  | BEN     | Benzene                                                      | 6        | 78  |

|      |                                               |    |      |                                                                                                                                  |      |       |
|------|-----------------------------------------------|----|------|----------------------------------------------------------------------------------------------------------------------------------|------|-------|
| O1D  | Excited state oxygen atom, O( <sup>1</sup> D) | 16 | BENP | Peroxy radicals formed from BEN                                                                                                  | 6    | 127   |
| O2   | Oxygen                                        | 32 | CH4  | methane                                                                                                                          | 1    | 16    |
| O3   | Ozone                                         | 48 | CHO  | Phenoxy radical formed from CSL                                                                                                  | 7    | 139   |
| O3P  | Ground state oxygen atom, O( <sup>3</sup> P)  | 16 | CSL  | Cresol and other hydroxy substituted aromatics                                                                                   | 7    | 108   |
| SO2  | Sulfur dioxide                                | 64 | DCB1 | Unsaturated dicarbonyls                                                                                                          | 4.5  | 91    |
| SULF | Sulfuric acid                                 | 98 | DCB2 | Unsaturated dicarbonyls                                                                                                          | 7    | 110   |
|      |                                               |    | DCB3 | Unsaturated dicarbonyls                                                                                                          | 4    | 84    |
|      |                                               |    | DIEN | Butadiene and other anthropogenic dienes                                                                                         | 4    | 54    |
|      |                                               |    | EOH  | Ethanol                                                                                                                          | 2    | 46    |
|      |                                               |    | EPX  | Epoxide formed in TOL, XYL and XYO reactions                                                                                     | 7.75 | 122.5 |
|      |                                               |    | ETE  | ethene                                                                                                                           | 2    | 28    |
|      |                                               |    | ETEG | Ethylene glycol                                                                                                                  | 2    | 62    |
|      |                                               |    | ETEP | Peroxy radicals formed from ETE                                                                                                  | 2    | 77    |
|      |                                               |    | ETH  | ethane                                                                                                                           | 2    | 30    |
|      |                                               |    | ETHP | Peroxy radicals formed from ETH                                                                                                  | 2    | 61    |
|      |                                               |    | GLY  | Glyoxal                                                                                                                          | 2    | 58    |
|      |                                               |    | HC3  | Alkanes, esters and alkynes with HO rate constant (298 K, 1 atm) less than 3.4x10 <sup>-12</sup> cm <sup>3</sup> s <sup>-1</sup> | 3.6  | 44    |
|      |                                               |    | HC3P | Peroxy radicals formed from HC3                                                                                                  | 3.6  | 75    |

|      |                                                                                                                                                      |     |     |
|------|------------------------------------------------------------------------------------------------------------------------------------------------------|-----|-----|
| HC5  | Alkanes, esters and alkynes with HO rate constant (298 K, 1 atm) between $3.4 \times 10^{-12}$ and $6.8 \times 10^{-12} \text{ cm}^3 \text{ s}^{-1}$ | 5.6 | 72  |
| HC5P | Peroxy radicals formed from HC5                                                                                                                      | 5.6 | 103 |
| HC8  | Alkanes, esters and alkynes with HO rate constant (298 K, 1 atm) greater than $6.8 \times 10^{-12} \text{ cm}^3 \text{ s}^{-1}$                      | 7.9 | 114 |
| HC8P | Peroxy radicals formed from HC8                                                                                                                      | 7.9 | 145 |
| HCHO | Formaldehyde                                                                                                                                         | 1   | 30  |
| HKET | Hydroxy ketone                                                                                                                                       | 3   | 74  |
| ISHP | Beta-hydroxy hydroperoxides from ISOP+HO <sub>2</sub>                                                                                                | 5   | 118 |
| ISO  | Isoprene                                                                                                                                             | 5   | 68  |
| ISON | Beta-hydroxyalkylnitrates from ISOP+NO<br>alkylnitrates from ISO+NO <sub>3</sub>                                                                     | 5   | 147 |
| ISOP | Peroxy radicals formed from ISO+HO                                                                                                                   | 5   | 117 |
| KET  | ketones                                                                                                                                              | 5   | 86  |
| KETP | Peroxy radicals formed from KET                                                                                                                      | 5   | 117 |
| LIM  | d-limonene and other cyclic diene-terpenes                                                                                                           | 10  | 136 |
| LIMP | Peroxy radicals formed from LIM                                                                                                                      | 10  | 185 |
| MACP | Peroxy radicals formed from MACR+HO                                                                                                                  | 4   | 101 |

|                 |                                                                                               |   |     |
|-----------------|-----------------------------------------------------------------------------------------------|---|-----|
| MACR            | methacrolein                                                                                  | 4 | 70  |
| MAHP            | Hydroperoxides from<br>MACP+HO <sub>2</sub>                                                   | 4 | 102 |
| MCP             | Peroxy radical formed<br>from MACR + HO which<br>does not form MPAN                           | 4 | 119 |
| MCT             | Methyl catechol                                                                               | 7 | 124 |
| MCTO            | Alkoxy radical formed<br>from MCT+HO and<br>MCT+NO <sub>3</sub>                               | 7 | 123 |
| MCTP            | Radical formed fro<br>MCT+O <sub>3</sub> reaction                                             | 7 | 172 |
| MEK             | Methyl ethyl ketone                                                                           | 4 | 72  |
| MEKP            | Peroxy radicals formed<br>from MEK                                                            | 4 | 103 |
| MGLY            | Methylglyoxal and other<br>alpha-carbonyl aldehydes                                           | 3 | 72  |
| MO <sub>2</sub> | Methyl peroxy radical                                                                         | 1 | 47  |
| MOH             | methanol                                                                                      | 1 | 32  |
| MPAN            | Peroxymethacryloynitrate<br>and other higher<br>peroxyacylnitrates from<br>isoprene oxidation | 4 | 148 |
| MVK             | Methyl vinyl ketone                                                                           | 4 | 70  |
| MVKP            | Peroxy radicals formed<br>from MVK                                                            | 4 | 119 |
| NALD            | nitrooxyacetaldehyde                                                                          | 2 | 105 |
| OLI             | Internal alkenes                                                                              | 5 | 68  |
| OLIP            | Peroxy radicals formed<br>from OLI                                                            | 5 | 117 |
| OLND            | NO <sub>3</sub> -alkene adduct<br>reacting via<br>decomposition                               | 3 | 136 |

|      |                                                                                 |     |     |
|------|---------------------------------------------------------------------------------|-----|-----|
| OLNN | NO <sub>3</sub> -alkene adduct reacting to form carbonitrates + HO <sub>2</sub> | 3   | 136 |
| OLT  | Terminal alkenes                                                                | 3.8 | 42  |
| OLTP | Peroxy radicals formed from OLT                                                 | 3.8 | 91  |
| ONIT | Organic nitrate                                                                 | 3.5 | 119 |
| OP1  | Methyl hydrogen peroxide                                                        | 1   | 48  |
| OP2  | Higher organic peroxides                                                        | 2   | 62  |
| ORA1 | Formic acid                                                                     | 1   | 46  |
| ORA2 | Acetic acid and higher acids                                                    | 2   | 60  |
| ORAP | Peroxy radical formed from ORA2 + HO reaction                                   | 2   | 109 |
| PAA  | Peroxyacetic acids and higher analogs                                           | 2   | 76  |
| PAN  | Peroxyacetyl nitrate and higher saturated PANs                                  | 2   | 121 |
| PER1 | Peroxy intermediate formed from TOL                                             | 7.1 | 141 |
| PER2 | Peroxy intermediate formed from TOL                                             | 7.1 | 157 |
| PHEN | phenol                                                                          | 6   | 94  |
| PHO  | Phenoxy radical formed from phenol                                              | 6   | 93  |
| PPN  | Peroxypropionyl nitrate                                                         | 3   | 135 |
| RCO3 | Higher saturated acyl peroxy radicals                                           | 3   | 90  |
| ROH  | C <sub>3</sub> and higher alcohols                                              | 3   | 60  |
| TLP1 | Peroxy radicals formed from TOL                                                 | 7.1 | 91  |

|      |                                             |     |     |
|------|---------------------------------------------|-----|-----|
| TOL  | Toluene and less reactive aromatics         | 7.1 | 92  |
| TOLP | Peroxy radicals formed from TOL             | 7.1 | 141 |
| TR2  | Peroxy radicals formed from TOL             | 7.1 | 109 |
| UALD | Unsaturated aldehydes                       | 5   | 84  |
| UALP | Peroxy radicals formed from UALD            | 5   | 133 |
| XO2  | Accounts for addition NO to NO2 conversions | N/a | N/a |
| XY2  | Peroxy radicals formed from XYL             | 8.9 | 124 |
| XYL1 | Peroxy radicals formed from XYL             | 8.9 | 156 |
| XYM  | M-xylene                                    | 8.9 | 106 |
| XYP  | P-xylene                                    | 8.9 | 106 |
| XYLP | Peroxy radicals formed from XYL             | 8.9 | 155 |
| XYO  | o-xylene                                    | 8.9 | 106 |
| XYO2 | Peroxy radicals formed from XYO             | 8.9 | 155 |
| XYOP | Peroxy radicals formed from XYO             | 8.9 | 155 |

**Table S2a. The RACM2 Chemical Mechanism: Photolysis Reactions**

| Reaction No. | Reaction                                                                                                 | Photolysis Frequency<br>$s^{-1}$ | Cross Section Notes | Quantum Yield Notes |
|--------------|----------------------------------------------------------------------------------------------------------|----------------------------------|---------------------|---------------------|
| R001         | $O_3 + h\nu \rightarrow O^3P + O_2$                                                                      | $4.31 \times 10^{-4}$            | JPL 2011            | 1                   |
| R002         | $O_3 + h\nu \rightarrow O^1D + O_2$                                                                      | $1.67 \times 10^{-5}$            | JPL 2011            | JPL 2011            |
| R003         | $H_2O_2 + h\nu \rightarrow 2 HO$                                                                         | $5.98 \times 10^{-6}$            | JPL 2011            | 2                   |
| R004         | $NO_2 + h\nu \rightarrow O^3P + NO$                                                                      | $8.41 \times 10^{-3}$            | JPL 2011            | JPL 2011            |
| R005         | $NO_3 + h\nu \rightarrow NO + O_2$                                                                       | $2.28 \times 10^{-2}$            | JPL 2011            | JPL 2011            |
| R006         | $NO_3 + h\nu \rightarrow O^3P + NO_2$                                                                    | $1.80 \times 10^{-1}$            | JPL 2011            | JPL 2011            |
| R007         | $HONO + h\nu \rightarrow HO + NO$                                                                        | $1.22 \times 10^{-3}$            | JPL 2011            | JPL 2011            |
| R008         | $HNO_3 + h\nu \rightarrow HO + NO_2$                                                                     | $4.59 \times 10^{-7}$            | JPL 2011            | 2                   |
| R009         | $HNO_4 + h\nu \rightarrow 0.20 HO + 0.80 HO_2 + 0.80 NO_2 + 0.20 NO_3$                                   | $5.21 \times 10^{-6}$            | JPL 2011            | 2,3                 |
| R010         | $HCHO + h\nu \rightarrow H_2 + CO$                                                                       | $4.02 \times 10^{-5}$            | JPL 2011            | JPL 2011            |
| R011         | $HCHO + h\nu \rightarrow 2 HO_2 + CO$                                                                    | $4.02 \times 10^{-5}$            | JPL 2011            | JPL 2011            |
| R012         | $ACD + h\nu \rightarrow HO_2 + MO_2 + CO$                                                                | $3.45 \times 10^{-6}$            | JPL 2011            | JPL 2011            |
| R013         | $ALD + h\nu \rightarrow HO_2 + ETHP + CO$                                                                | $4.41 \times 10^{-6}$            | JPL 2011            | 4                   |
| R014         | $ACT + h\nu \rightarrow MO_2 + ACO_3$                                                                    | $9.91 \times 10^{-7}$            | JPL 2011            | JPL 2011            |
| R015         | $UALD + h\nu \rightarrow 1.22 HO_2 + 0.784 ACO_3 + 1.22 CO + 0.35 HCHO + 0.434 ALD + 0.216 KET$          | $1.15 \times 10^{-5}$            | 5                   | 6                   |
| R016         | $MEK + h\nu \rightarrow 0.50 MO_2 + 0.50 ETHP + ACO_3$                                                   | $1.10 \times 10^{-6}$            | 7                   | 8                   |
| R017         | $KET + h\nu \rightarrow ETHP + ACO_3$                                                                    | $8.60 \times 10^{-6}$            | 9                   | 8                   |
| R018         | $HKET + h\nu \rightarrow HO_2 + ACO_3 + HCHO$                                                            | $1.48 \times 10^{-6}$            | 10, R17 (KET)       | R17 (KET)           |
| R019         | $MACR + h\nu \rightarrow 0.34 HO + 0.66 HO_2 + 0.67 ACO_3 + 0.33 MACP + 0.34 XO_2 + 0.67 CO + 0.67 HCHO$ | $3.55 \times 10^{-6}$            | JPL 2011            | JPL 2011            |
| R020         | $MVK + h\nu \rightarrow 0.3 MO_2 + 0.3 MACP + 0.7 CO + 0.7 UALD$                                         | $7.59 \times 10^{-7}$            | JPL 2011            | JPL 2011            |
| R021         | $GLY + h\nu \rightarrow H_2 + 2 CO$                                                                      | $4.95 \times 10^{-6}$            | JPL 2011            | JPL 2011            |
| R022         | $GLY + h\nu \rightarrow 2 CO + HCHO$                                                                     | $2.37 \times 10^{-5}$            | JPL 2011            | JPL 2011            |
| R023         | $GLY + h\nu \rightarrow 2 HO_2 + 2 CO$                                                                   | $6.03 \times 10^{-5}$            | JPL 2011            | JPL 2011            |
| R024         | $MGLY + h\nu \rightarrow HO_2 + ACO_3 + CO$                                                              | $6.03 \times 10^{-4}$            | JPL 2011            | JPL 2011            |
| R025         | $DCB1 + h\nu \rightarrow 1.5 HO_2 + 0.5 ACO_3 + 2 XO_2 + CO + 0.5 GLY + 0.5 MGLY$                        | $6.03 \times 10^{-4}$            | R24 (MGLY)          | R24 (MGLY)          |



**Table S2a – Continued. The RACM2 Chemical Mechanism: Photolysis Reactions**

| Reaction No. | Reaction                                                                                                                         | Photolysis Frequency<br>$s^{-1}$ | Cross Section | Quantum Yield |
|--------------|----------------------------------------------------------------------------------------------------------------------------------|----------------------------------|---------------|---------------|
| R026         | DCB2 + $h\nu \rightarrow 1.5 \text{ HO}_2 + 0.5 \text{ ACO}_3 + 2 \text{ XO}_2 + \text{CO} + 0.5 \text{ GLY} + 0.5 \text{ MGLY}$ | $6.03 \times 10^{-4}$            | R24 (MGLY)    | R24 (MGLY)    |
| R027         | BALD + $h\nu \rightarrow \text{CHO} + \text{HO}_2 + \text{CO}$                                                                   | $3.32 \times 10^{-5}$            | 12, SAPRC07   | SAPRC07       |
| R028         | OP1 + $h\nu \rightarrow \text{HO} + \text{HO}_2 + \text{HCHO}$                                                                   | $4.11 \times 10^{-6}$            | JPL 2011      | 13, JPL 2011  |
| R029         | OP2 + $h\nu \rightarrow \text{HO} + \text{HO}_2 + \text{ALD}$                                                                    | $4.11 \times 10^{-6}$            | R29 (OP1)     | R29 (OP1)     |
| R030         | PAA + $h\nu \rightarrow \text{HO} + \text{MO}_2$                                                                                 | $5.93 \times 10^{-7}$            | JPL 2011      | 14            |
| R031         | ONIT + $h\nu \rightarrow \text{HO}_2 + \text{NO}_2 + 0.20 \text{ ALD} + 0.80 \text{ KET}$                                        | $1.96 \times 10^{-6}$            | 15            | 15            |
| R032         | PAN + $h\nu \rightarrow \text{ACO}_3 + \text{NO}_2$                                                                              | $3.81 \times 10^{-7}$            | JPL (2011)    | JPL (2011)    |
| R033         | PAN + $h\nu \rightarrow \text{MO}_2 + \text{NO}_3 + \text{CO}_2$                                                                 | $2.26 \times 10^{-7}$            | JPL (2011)    | JPL (2011)    |

1. Assumed to be equal to 1.00 minus the quantum yield of R002 ( $\text{O}^1\text{D}$ ).

2. Assumed to be unity

3. Stoichiometry: JPL 2011 above 200 nm

4. Heicklen et al. (1986)

5. Based upon crotonaldehyde

6. Magneron et al. 2002

7. Yujing and Mellouki 2000

8. Set to 0.34, Raben and Moortgat (1996)

9.  $\text{C}_2\text{H}_5\text{COC}_2\text{H}_5$  used as surrogate Yujing and Mellouki 2000

10. Products from hydroxyacetone

11. OLIP added for mass balance

12. Products Zhu and Cronin (2000)

13. Set to 1.00

14. Orlando, J. J. and G. S. Tyndall, 2003 – assumed to be unity

15. Talukdar et al. (1997)

**Table S2b. The RACM2 Chemical Mechanism, Thermal Reactions**

| Reaction No.               | Reaction                                                                                                 | A,<br>cm <sup>3</sup> s <sup>-1</sup> | E/R<br>K | k <sup>*</sup>           | Note |
|----------------------------|----------------------------------------------------------------------------------------------------------|---------------------------------------|----------|--------------------------|------|
| <i>Inorganic Reactions</i> |                                                                                                          |                                       |          |                          |      |
| R034                       | O <sub>3</sub> + HO → HO <sub>2</sub> + O <sub>2</sub>                                                   | 1.70 × 10 <sup>-12</sup>              | 940      | 7.26 × 10 <sup>-14</sup> | 1    |
| R035                       | O <sub>3</sub> + HO <sub>2</sub> → HO + 2 O <sub>2</sub>                                                 | 1.00 × 10 <sup>-14</sup>              | 490      | 1.93 × 10 <sup>-15</sup> | 2    |
| R036                       | O <sub>3</sub> + NO → NO <sub>2</sub> + O <sub>2</sub>                                                   | 1.40 × 10 <sup>-12</sup>              | 1310     | 1.73 × 10 <sup>-14</sup> | 1    |
| R037                       | O <sub>3</sub> + NO <sub>2</sub> → NO <sub>3</sub> + O <sub>2</sub>                                      | 1.40 × 10 <sup>-13</sup>              | 2470     | 3.53 × 10 <sup>-17</sup> | 1    |
| R038                       | O <sup>3</sup> P + O <sub>2</sub> → O <sub>3</sub>                                                       | Table 2f                              |          | 1.40 × 10 <sup>-14</sup> | 1    |
| R039                       | O <sup>3</sup> P + O <sub>3</sub> → 2 O <sub>2</sub>                                                     | 8.00 × 10 <sup>-12</sup>              | 2060     | 7.99 × 10 <sup>-15</sup> | 1    |
| R040                       | O <sup>1</sup> D + O <sub>2</sub> → O <sup>3</sup> P + O <sub>2</sub>                                    | 3.20 × 10 <sup>-11</sup>              |          | 3.20 × 10 <sup>-11</sup> | 1    |
| R041                       | O <sup>1</sup> D + N <sub>2</sub> → O <sup>3</sup> P + N <sub>2</sub>                                    | 1.80 × 10 <sup>-11</sup>              | -107     | 2.58 × 10 <sup>-11</sup> | 1    |
| R042                       | O <sup>1</sup> D + H <sub>2</sub> O → 2 HO                                                               | 2.20 × 10 <sup>-10</sup>              |          | 2.20 × 10 <sup>-10</sup> | 1    |
| R043                       | H <sub>2</sub> + HO → H <sub>2</sub> O + HO <sub>2</sub>                                                 | 7.70 × 10 <sup>-12</sup>              | 2100     | 6.72 × 10 <sup>-15</sup> | 1    |
| R044                       | HO + HO <sub>2</sub> → H <sub>2</sub> O + O <sub>2</sub>                                                 | 4.80 × 10 <sup>-11</sup>              | -250     | 1.11 × 10 <sup>-10</sup> | 1    |
| R045                       | 2 HO <sub>2</sub> → H <sub>2</sub> O <sub>2</sub> + O <sub>2</sub>                                       | Table 2f                              |          | 2.90 × 10 <sup>-12</sup> | 1    |
| R046                       | 2 HO <sub>2</sub> + H <sub>2</sub> O → H <sub>2</sub> O <sub>2</sub> + H <sub>2</sub> O + O <sub>2</sub> | Table 2f                              |          | 6.42 × 10 <sup>-30</sup> | 1    |
| R047                       | H <sub>2</sub> O <sub>2</sub> + HO → HO <sub>2</sub> + H <sub>2</sub> O                                  | 2.90 × 10 <sup>-12</sup>              | 160      | 1.70 × 10 <sup>-12</sup> | 1    |
| R048                       | NO + O <sup>3</sup> P → NO <sub>2</sub>                                                                  | Table 2d                              |          | 1.66 × 10 <sup>-12</sup> | 2    |
| R049                       | NO + HO → HONO                                                                                           | Table 2d                              |          | 7.40 × 10 <sup>-12</sup> | 2    |
| R050                       | NO + HO <sub>2</sub> → NO <sub>2</sub> + HO                                                              | 3.45 × 10 <sup>-12</sup>              | -270     | 8.90 × 10 <sup>-12</sup> | 1    |
| R51                        | NO + HO <sub>2</sub> → HNO <sub>3</sub>                                                                  | Table 2f                              |          |                          | 1    |

**Table SS2b2b – Continued. The RACM2 Chemical Mechanism, Thermal Reactions**

| Reaction No. | Reaction                                                                                                            | A, $\text{cm}^3 \text{s}^{-1}$ | E/R K | $K^*$                  | Note |
|--------------|---------------------------------------------------------------------------------------------------------------------|--------------------------------|-------|------------------------|------|
| R052         | $2 \text{NO} + \text{O}_2 \rightarrow 2 \text{NO}_2$                                                                | $3.30 \times 10^{-39}$         | -530  | $1.95 \times 10^{-38}$ | 1    |
| R053         | $\text{HONO} + \text{HO} \rightarrow \text{NO}_2 + \text{H}_2\text{O}$                                              | $2.50 \times 10^{-12}$         | -260  | $5.98 \times 10^{-12}$ | 1    |
| R054         | $\text{NO}_2 + \text{O}^3\text{P} \rightarrow \text{NO} + \text{O}_2$                                               | $5.50 \times 10^{-12}$         | -188  | $1.03 \times 10^{-11}$ | 1    |
| R055         | $\text{NO}_2 + \text{O}^3\text{P} \rightarrow \text{NO}_3$                                                          | Table 2d                       |       | $3.28 \times 10^{-12}$ | 2    |
| R056         | $\text{NO}_2 + \text{HO} \rightarrow \text{HNO}_3$                                                                  | Table 2d                       |       | $1.06 \times 10^{-11}$ | 2    |
| R057         | $\text{HNO}_3 + \text{HO} \rightarrow \text{NO}_3 + \text{H}_2\text{O}$                                             | Table 2f                       |       | $1.50 \times 10^{-13}$ | 1    |
| R058         | $\text{NO}_3 + \text{HO} \rightarrow \text{NO}_2 + \text{HO}_2$                                                     | $2.00 \times 10^{-11}$         |       | $2.00 \times 10^{-11}$ | 1    |
| R059         | $\text{NO}_3 + \text{HO}_2 \rightarrow 0.7 \text{HO} + 0.7 \text{NO}_2 + 0.3 \text{HNO}_3$<br>Products Le Bras 1997 | $4.00 \times 10^{-12}$         |       | $4.00 \times 10^{-12}$ | 1    |
| R060         | $\text{NO}_3 + \text{NO} \rightarrow 2 \text{NO}_2$                                                                 | $1.80 \times 10^{-11}$         | -110  | $2.60 \times 10^{-11}$ | 1    |
| R061         | $\text{NO}_3 + \text{NO}_2 \rightarrow \text{NO} + \text{NO}_2 + \text{O}_2$                                        | $4.50 \times 10^{-14}$         | 1260  | $6.57 \times 10^{-16}$ | 2    |
| R062         | $2 \text{NO}_3 \rightarrow 2 \text{NO}_2 + \text{O}_2$                                                              | $8.50 \times 10^{-13}$         | 2450  | $2.29 \times 10^{-16}$ | 2    |
| R063         | $\text{NO}_3 + \text{NO}_2 \rightarrow \text{N}_2\text{O}_5$                                                        | Table 2d                       |       | $1.18 \times 10^{-12}$ | 2    |
| R064         | $\text{N}_2\text{O}_5 \rightarrow \text{NO}_2 + \text{NO}_3$                                                        | Table 2e                       |       | $4.44 \times 10^{-2}$  | 2    |
| R065         | $\text{N}_2\text{O}_5 + \text{H}_2\text{O} \rightarrow \text{HNO}_3 + \text{HNO}_3$                                 | $2.50 \times 10^{-22}$         |       | $2.50 \times 10^{-22}$ | 1    |
| R066         | $\text{NO}_2 + \text{HO}_2 \rightarrow \text{HNO}_4$                                                                | Table 2d                       |       | $1.14 \times 10^{-12}$ | 2    |
| R067         | $\text{HNO}_4 \rightarrow \text{HO}_2 + \text{NO}_2$                                                                | Table 2e                       |       | $7.19 \times 10^{-2}$  | 2    |
| R068         | $\text{HNO}_4 + \text{HO} \rightarrow \text{NO}_2 + \text{H}_2\text{O} + \text{O}_2$                                | $1.30 \times 10^{-12}$         | -380  | $4.65 \times 10^{-12}$ | 1, 3 |
| R069         | $\text{SO}_2 + \text{HO} \rightarrow \text{SULF} + \text{HO}_2$                                                     | Table 2d                       |       | $9.58 \times 10^{-13}$ | 2    |
| R070         | $\text{CO} + \text{HO} \rightarrow \text{HO}_2 + \text{CO}_2$                                                       | Table 2f                       |       | $2.15 \times 10^{-13}$ | 1    |

**Table S2b – Continued. The RACM2 Chemical Mechanism, Thermal Reactions**

| Reaction No.          | Reaction                                                                                                                               | A, $\text{cm}^3 \text{s}^{-1}$ | E/R K | k*                     | Note |
|-----------------------|----------------------------------------------------------------------------------------------------------------------------------------|--------------------------------|-------|------------------------|------|
| <i>Alkanes + HO</i>   |                                                                                                                                        |                                |       |                        |      |
| R071                  | $\text{CH}_4 + \text{HO} \rightarrow \text{MO}_2 + \text{H}_2\text{O}$                                                                 | $1.85 \times 10^{-12}$         | 1690  | $6.39 \times 10^{-15}$ | 1    |
| R072                  | $\text{ETH} + \text{HO} \rightarrow \text{ETHP} + \text{H}_2\text{O}$                                                                  | $6.90 \times 10^{-12}$         | 1000  | $2.41 \times 10^{-13}$ | 1    |
| R073                  | $\text{HC3} + \text{HO} \rightarrow \text{HC3P} + \text{H}_2\text{O}$                                                                  | $7.68 \times 10^{-12}$         | 370   | $2.22 \times 10^{-12}$ | 4    |
| R074                  | $\text{HC5} + \text{HO} \rightarrow \text{HC5P} + \text{H}_2\text{O}$                                                                  | $1.01 \times 10^{-11}$         | 245   | $4.44 \times 10^{-12}$ | 5    |
| R075                  | $\text{HC8} + \text{HO} \rightarrow 0.049 \text{HO}_2 + 0.951 \text{HC8P} + \text{H}_2\text{O} + 0.025 \text{ALD} + 0.024 \text{HKET}$ | $2.82 \times 10^{-11}$         | 273   | $1.13 \times 10^{-11}$ | 6    |
| <i>Alkenes + HO</i>   |                                                                                                                                        |                                |       |                        |      |
| R076                  | $\text{ETE} + \text{HO} \rightarrow \text{ETEP}$                                                                                       | Table 2d                       |       | $8.20 \times 10^{-12}$ | 2    |
| R077                  | $\text{OLT} + \text{HO} \rightarrow \text{OLTP}$                                                                                       | $5.72 \times 10^{-12}$         | -500  | $3.06 \times 10^{-11}$ | 7    |
| R078                  | $\text{OLI} + \text{HO} \rightarrow \text{OLIP}$                                                                                       | $1.33 \times 10^{-11}$         | -500  | $7.11 \times 10^{-11}$ | 7    |
| R079                  | $\text{DIEN} + \text{HO} \rightarrow \text{OLIP}$                                                                                      | $1.48 \times 10^{-11}$         | -448  | $6.65 \times 10^{-11}$ | 8    |
| <i>Alkynes + HO</i>   |                                                                                                                                        |                                |       |                        |      |
| R080                  | $\text{ACE} + \text{HO} \rightarrow 0.65 \text{HO} + 0.35 \text{HO}_2 + 0.35 \text{CO} + 0.650 \text{GLY} + 0.35 \text{ORA1}$          | Table 2d                       |       | $7.47 \times 10^{-13}$ | 2    |
| <i>Aromatics + HO</i> |                                                                                                                                        |                                |       |                        |      |
| R081                  | $\text{BEN} + \text{HO} \rightarrow 0.648 \text{HO}_2 + 0.352 \text{BENP} + 0.118 \text{EPX} + 0.53 \text{PHEN}$                       | $2.33 \times 10^{-12}$         | 193   | $1.22 \times 10^{-12}$ | 9    |
| R082                  | $\text{TOL} + \text{HO} \rightarrow 0.177 \text{HO}_2 + 0.763 \text{TR2} + 0.06 \text{TLP1} + 0.177 \text{CSL}$                        | $1.81 \times 10^{-12}$         | -354  | $5.93 \times 10^{-12}$ | 10   |
| R083                  | $\text{XYM} + \text{HO} \rightarrow 0.177 \text{HO}_2 + 0.763 \text{XY2} + 0.06 \text{XYL1} + 0.117 \text{CSL}$                        | $2.31 \times 10^{-11}$         |       | $2.31 \times 10^{-11}$ | 10   |
| R084                  | $\text{XYP} + \text{HO} \rightarrow 0.177 \text{HO}_2 + 0.763 \text{XY2} + 0.06 \text{XYL1} + 0.117 \text{CSL}$                        | $1.43 \times 10^{-11}$         |       | $2.13 \times 10^{-11}$ | 10   |

**Table 2b – Continued. The RACM2 Chemical Mechanism, Thermal Reactions**

| Reaction No.                      | Reaction                                                                             | A,<br>cm <sup>3</sup> s <sup>-1</sup> | E/R<br>K | K <sup>*</sup>           | Note |
|-----------------------------------|--------------------------------------------------------------------------------------|---------------------------------------|----------|--------------------------|------|
| R085                              | XYO + HO → 0.177 HO <sub>2</sub> + 0.763<br>XYO <sub>2</sub> + 0.06 XYL1 + 0.117 CSL | 1.36 × 10 <sup>-11</sup>              |          | 1.36 × 10 <sup>-11</sup> | 10   |
| <i>Biogenic Hydrocarbons + HO</i> |                                                                                      |                                       |          |                          |      |
| R086                              | ISO + HO → ISOP                                                                      | 2.54 × 10 <sup>-11</sup>              | -410     | 1.00 × 10 <sup>-10</sup> | 11   |
| R087                              | API + HO → APIP                                                                      | 1.21 × 10 <sup>-11</sup>              | -440     | 5.29 × 10 <sup>-11</sup> | 1    |
| R088                              | LIM + HO → LIMP                                                                      | 4.20 × 10 <sup>-11</sup>              | -401     | 1.61 × 10 <sup>-10</sup> | 12   |
| <i>Aldehydes + HO</i>             |                                                                                      |                                       |          |                          |      |
| R089                              | HCHO + HO → HO <sub>2</sub> + H <sub>2</sub> O + CO                                  | 5.50 × 10 <sup>-12</sup>              | -125     | 8.36 × 10 <sup>-12</sup> | 2    |
| R090                              | ACD + HO → ACO <sub>3</sub> + H <sub>2</sub> O                                       | 4.38 × 10 <sup>-12</sup>              | -366     | 1.49 × 10 <sup>-11</sup> | 13   |
| R091                              | ALD + HO → RCO <sub>3</sub> + H <sub>2</sub> O                                       | 5.10 × 10 <sup>-12</sup>              | -405     | 1.98 × 10 <sup>-11</sup> | 1    |
| <i>Ketones + HO</i>               |                                                                                      |                                       |          |                          |      |
| R092                              | ACT + HO → ACTP + H <sub>2</sub> O                                                   | Table 2f                              |          | 1.78 × 10 <sup>-13</sup> | 14   |
| R093                              | MEK + HO → MEKP + H <sub>2</sub> O                                                   | 1.30 × 10 <sup>-12</sup>              | 25       | 1.20 × 10 <sup>-12</sup> | 1    |
| R094                              | KET + HO → KETP + H <sub>2</sub> O                                                   | 2.80 × 10 <sup>-12</sup>              | - 10     | 2.90 × 10 <sup>-12</sup> | 15   |
| R095                              | HKET + HO → HO <sub>2</sub> + H <sub>2</sub> O + MGLY                                | 3.00 × 10 <sup>-12</sup>              |          | 3.00 × 10 <sup>-12</sup> | 16   |
| <i>Unsaturated Carbonyls + HO</i> |                                                                                      |                                       |          |                          |      |
| R096                              | MACR + HO → 0.57 MACP + 0.43<br>MCP                                                  | 8.0 × 10 <sup>-12</sup>               | -380     | 2.9 × 10 <sup>-11</sup>  | 1    |
| R097                              | MVK + HO → MVKP                                                                      | 2.60 × 10 <sup>-12</sup>              | -610     | 2.01 × 10 <sup>-11</sup> | 8    |
| R098                              | UALD + HO → 0.313 ACO <sub>3</sub> + 0.687<br>UALP                                   | 5.77 × 10 <sup>-12</sup>              | -533     | 3.45 × 10 <sup>-11</sup> | 17   |
| <i>Dicarbonyls + HO</i>           |                                                                                      |                                       |          |                          |      |

**Table S2b – Continued. The RACM2 Chemical Mechanism, Thermal Reactions**

| Reaction No.                     | Reaction                                                                                       | A,<br>cm <sup>3</sup> s <sup>-1</sup> | E/R<br>K | k <sup>*</sup>           | Note   |
|----------------------------------|------------------------------------------------------------------------------------------------|---------------------------------------|----------|--------------------------|--------|
| R099                             | GLY + HO → HO <sub>2</sub> + H <sub>2</sub> O + 2 CO                                           | 1.10 × 10 <sup>-11</sup>              |          | 1.10 × 10 <sup>-11</sup> | 8      |
| R100                             | MGLY + HO → ACO <sub>3</sub> + H <sub>2</sub> O + CO                                           | 9.26 × 10 <sup>-13</sup>              | -830     | 1.50 × 10 <sup>-11</sup> | 18, 19 |
| R101                             | DCB1 + HO → 0.52 HO <sub>2</sub> + 0.33 CO<br>+ 0.40 ALD + 0.78 KET + 0.10 GLY<br>+ 0.01 MGLY  | 2.8 × 10 <sup>-11</sup>               | -175     | 5.04 × 10 <sup>-11</sup> | 20     |
| R102                             | DCB2 + HO → 0.52 HO <sub>2</sub> + 0.33 CO<br>+ 0.13 MEK + 0.10 GLY + 0.01<br>MGLY + 0.78 OP2  | 2.8 × 10 <sup>-11</sup>               | -175     | 5.04 × 10 <sup>-11</sup> | 20     |
| R103                             | DCB3 + HO → 0.56 HO <sub>2</sub> + 0.21<br>MACP + 0.11 CO + 0.27 GLY + 0.01<br>MGLY + 0.79 OP2 | 1.00 × 10 <sup>-13</sup>              |          | 1.00 × 10 <sup>-13</sup> | 20     |
| <i>Oxygenated Aromatics + HO</i> |                                                                                                |                                       |          |                          |        |
| R104                             | BALD + HO → BALP + H <sub>2</sub> O                                                            | 5.32 × 10 <sup>-12</sup>              | -243     | 1.20 × 10 <sup>-11</sup> | 21     |
| R105                             | PHEN + HO → 0.73 HO <sub>2</sub> + 0.20<br>ADDC + 0.07 CHO + 0.73 MCT                          | 6.75 × 10 <sup>-12</sup>              | -405     | 2.63 × 10 <sup>-11</sup> | 9      |
| R106                             | CSL + HO → 0.73 HO <sub>2</sub> + 0.20 ADDC<br>+ 0.07 CHO + 0.73 MCT                           | 4.65 × 10 <sup>-11</sup>              |          | 4.65 × 10 <sup>-11</sup> | 9      |
| R107                             | EPX + HO → HO <sub>2</sub> + XO <sub>2</sub> + CO +<br>ALD                                     | 2.8 × 10 <sup>-11</sup>               | -175     | 5.04 × 10 <sup>-11</sup> | 20     |
| R108                             | MCT + HO → MCTO                                                                                | 2.05 × 10 <sup>-10</sup>              |          | 2.05 × 10 <sup>-10</sup> | 9      |
| <i>Alcohols and Glycols + HO</i> |                                                                                                |                                       |          |                          |        |
| R109                             | MOH + HO → HO <sub>2</sub> + HCHO                                                              | 2.85 × 10 <sup>-12</sup>              | 345      | 8.96 × 10 <sup>-13</sup> | 1      |
| R110                             | EOH + HO → HO <sub>2</sub> + ACD                                                               | 3.00 × 10 <sup>-12</sup>              | -20      | 2.81 × 10 <sup>-12</sup> | 1      |
| R111                             | ROH + HO → HO <sub>2</sub> + 0.719 ALD +<br>0.184 ACD                                          | 2.60 × 10 <sup>-12</sup>              | -200     | 1.33 × 10 <sup>-12</sup> | 1      |

**Table S2b – Continued. The RACM2 Chemical Mechanism, Thermal Reactions**

| Reaction No. | Reaction                                                                                  | A, $\text{cm}^3 \text{s}^{-1}$ | E/R K | k*                     | Note  |
|--------------|-------------------------------------------------------------------------------------------|--------------------------------|-------|------------------------|-------|
| R112         | ETEG + HO $\rightarrow$ HO <sub>2</sub> + ALD                                             | $1.47 \times 10^{-11}$         |       | $1.47 \times 10^{-11}$ | 22    |
|              | <i>Organic Peroxides + HO</i>                                                             |                                |       |                        |       |
| R113         | OP1 + HO $\rightarrow$ 0.35 HO + 0.65 MO <sub>2</sub> + 0.35 HCHO                         | $2.90 \times 10^{-12}$         | -190  | $5.48 \times 10^{-12}$ | 8     |
| R114         | OP2 + HO $\rightarrow$ 0.49 HO + 0.44 HC3P + 0.07 XO <sub>2</sub> + 0.08 ALD + 0.41 KET   | $3.40 \times 10^{-12}$         | -190  | $6.43 \times 10^{-12}$ | 23    |
| R115         | ISHP + HO $\rightarrow$ HO + MACR                                                         | $1.00 \times 10^{-10}$         |       | $1.00 \times 10^{-10}$ | 11    |
| R116         | MAHP + HO $\rightarrow$ MACP                                                              | $3.00 \times 10^{-11}$         |       | $3.00 \times 10^{-11}$ | 11    |
|              | <i>Organic Acids + HO</i>                                                                 |                                |       |                        |       |
| R117         | ORA1 + HO $\rightarrow$ HO <sub>2</sub> + H <sub>2</sub> O + CO <sub>2</sub>              | $4.50 \times 10^{-13}$         |       | $4.50 \times 10^{-13}$ | 24    |
| R118         | ORA2 + HO $\rightarrow$ 0.64 MO <sub>2</sub> + 0.36 ORAP + 0.64 CO <sub>2</sub>           | $2.20 \times 10^{-14}$         | -1012 | $6.55 \times 10^{-13}$ | 25    |
| R119         | PAA + HO $\rightarrow$ 0.35 HO + 0.65 ACO <sub>3</sub> + 0.35 XO <sub>2</sub> + 0.35 HCHO | $2.93 \times 10^{-12}$         | -190  | $5.54 \times 10^{-12}$ | 26    |
|              | <i>Organic Nitrogen Containing Compounds + HO</i>                                         |                                |       |                        |       |
| R120         | PAN + HO $\rightarrow$ XO <sub>2</sub> + H <sub>2</sub> O + NO <sub>3</sub> + HCHO        | $4.00 \times 10^{-14}$         |       | $4.00 \times 10^{-14}$ | 2     |
| R121         | PPN + HO $\rightarrow$ XO <sub>2</sub> + H <sub>2</sub> O + NO <sub>3</sub> + HCHO        | $4.00 \times 10^{-14}$         |       | $4.00 \times 10^{-14}$ | 2     |
| R122         | MPAN + HO $\rightarrow$ NO <sub>2</sub> + HKET                                            | $3.20 \times 10^{-11}$         |       | $3.20 \times 10^{-11}$ | 27    |
| R123         | ONIT + HO $\rightarrow$ HC3P + H <sub>2</sub> O + NO <sub>2</sub>                         | $5.31 \times 10^{-12}$         | 260   | $2.22 \times 10^{-12}$ |       |
| R124         | NALD + HO $\rightarrow$ NO <sub>2</sub> + XO <sub>2</sub> + HKET                          | $5.60 \times 10^{-12}$         | -270  | $1.39 \times 10^{-11}$ | 9, 11 |
| R125         | ISON + HO $\rightarrow$ NALD + 0.07 HKET + 0.07 HCHO                                      | $1.30 \times 10^{-11}$         |       | $1.30 \times 10^{-11}$ | 9, 11 |

**Table S2b – Continued. The RACM2 Chemical Mechanism, Thermal Reactions**

| Reaction No.                   | Reaction                                                                                                                                                                                                                                                                                                                                       | A,<br>cm <sup>3</sup> s <sup>-1</sup> | E/R<br>K | k <sup>*</sup>           | Note   |
|--------------------------------|------------------------------------------------------------------------------------------------------------------------------------------------------------------------------------------------------------------------------------------------------------------------------------------------------------------------------------------------|---------------------------------------|----------|--------------------------|--------|
| <i>Alkenes + O<sub>3</sub></i> |                                                                                                                                                                                                                                                                                                                                                |                                       |          |                          |        |
| R126                           | ETE + O <sub>3</sub> → 0.08 HO + 0.15 HO <sub>2</sub> + 0.13 H <sub>2</sub> + 0.43 CO + HCHO + 0.37 ORA1                                                                                                                                                                                                                                       | 9.14 × 10 <sup>-15</sup>              | 2580     | 1.60 × 10 <sup>-18</sup> | 1      |
| R127                           | OLT + O <sub>3</sub> → 0.22 HO + 0.32 HO <sub>2</sub> + 0.08 MO <sub>2</sub> + 0.06 ETHP + 0.068 H <sub>2</sub> O <sub>2</sub> + 0.43 CO + 0.01 CH <sub>4</sub> + 0.02 ETH + 0.56 HCHO + 0.44 ALD + 0.06 MEK + 0.03 ORA1 + 0.06 ORA2 + 0.01 ACD + 0.01 HKET + 0.015 HC3 + 0.04 HC3P + 0.03 ACT + 0.006 HC5 + 0.02 HC5P + 0.02 BALD + 0.032 BEN | 4.33 × 10 <sup>-15</sup>              | 1800     | 1.03 × 10 <sup>-17</sup> | 1      |
| R128                           | OLI + O <sub>3</sub> → 0.46 HO + 0.07 HO <sub>2</sub> + 0.32 MO <sub>2</sub> + 0.07 ETHP + 0.026 H <sub>2</sub> O <sub>2</sub> + 0.37 CO + 0.04 CH <sub>4</sub> + 0.01 ETH + 0.09 HCHO + 0.73 ALD + 0.017 KET + 0.017 ORA2 + 0.04 HC3P + 0.09 ACO3 + 0.01 HC3 + 0.457 ACD + 0.11 ACT + 0.44 HKET                                               | 4.40 × 10 <sup>-15</sup>              | 845      | 2.59 × 10 <sup>-16</sup> | 1      |
| R129                           | DIEN + O <sub>3</sub> → 0.09 O <sup>3</sup> P + 0.28 HO + 0.30 HO <sub>2</sub> + 0.03 MO <sub>2</sub> + 0.15 ACO <sub>3</sub> + 0.02 KETP + 0.13 XO <sub>2</sub> + 0.05 H <sub>2</sub> + 0.001 H <sub>2</sub> O <sub>2</sub> + 0.36 CO + 0.35 OLT + 0.90 HCHO + 0.39 MACR + 0.15 ORA1                                                          | 1.34 × 10 <sup>-14</sup>              | 2283     | 6.33 × 10 <sup>-18</sup> | 8      |
| R130                           | ISO + O <sub>3</sub> → 0.25 HO + 0.25 HO <sub>2</sub> + 0.08 MO <sub>2</sub> + 0.1 ACO <sub>3</sub> + 0.1 MACP + 0.09 H <sub>2</sub> O <sub>2</sub> + 0.14 CO + 0.58 HCHO + 0.461 MACR + 0.189 MVK + 0.28 ORA1 + 0.153 OLT                                                                                                                     | 7.86 × 10 <sup>-15</sup>              | 1913     | 1.28 × 10 <sup>-17</sup> | 11, 28 |
| R131                           | API + O <sub>3</sub> → 0.85 HO + 0.10 HO <sub>2</sub> + 0.20 ETHP + 0.42 KETP + 0.02 H <sub>2</sub> O <sub>2</sub> + 0.14 CO + 0.65 ALD + 0.53 KET                                                                                                                                                                                             | 5.00 × 10 <sup>-16</sup>              | 530      | 8.45 × 10 <sup>-17</sup> | 8      |



**Table S2b – Continued. The RACM2 Chemical Mechanism, Thermal Reactions**

| Reaction No. | Reaction                                                                                                                                                                                                                        | A,<br>$\text{cm}^3 \text{s}^{-1}$ | E/R<br>K | $k^*$                  | Note  |
|--------------|---------------------------------------------------------------------------------------------------------------------------------------------------------------------------------------------------------------------------------|-----------------------------------|----------|------------------------|-------|
| R132         | LIM + O <sub>3</sub> → 0.85 HO + 0.10 HO <sub>2</sub> + 0.16<br>ETHP + 0.42 KETP 0.02 H <sub>2</sub> O <sub>2</sub> + 0.14<br>CO + 0.46 OLT + 0.04 HCHO + 0.79<br>MACR + 0.01 ORA1 + 0.07 ORA2                                  | $2.95 \times 10^{-15}$            | 783      | $2.13 \times 10^{-16}$ | 8     |
| R133         | MACR + O <sub>3</sub> → 0.19 HO + 0.14 HO <sub>2</sub> +<br>0.10 ACO <sub>3</sub> + 0.22 CO + 0.50 MGLY +<br>0.45 ORA1                                                                                                          | $1.36 \times 10^{-15}$            | 2112     | $1.14 \times 10^{-18}$ | 1, 11 |
| R134         | MVK + O <sub>3</sub> → 0.16 HO + 0.11 HO <sub>2</sub> +<br>0.28 ACO <sub>3</sub> + 0.01 XO <sub>2</sub> + 0.56 CO 0.1<br>HCHO + 0.54 MGLY + 0.07 ORA1<br>+0.07 ORA2 + 0.1 ALD                                                   | $7.51 \times 10^{-16}$            | 1520     | $4.59 \times 10^{-18}$ | 9, 20 |
| R135         | UALD + O <sub>3</sub> → 0.1 HO + 0.072 HO <sub>2</sub> +<br>0.008 MO <sub>2</sub> + 0.002 ACO <sub>3</sub> + 0.1 XO <sub>2</sub> +<br>0.243 CO + 0.080 HCHO + 0.420 ACD<br>+ 0.028 KET + 0.491 GLY + 0.003<br>MGLY + 0.044 ORA1 | $1.66 \times 10^{-18}$            |          | $1.66 \times 10^{-18}$ | 29    |
| R136         | DCB1 + O <sub>3</sub> → 0.05 HO + HO <sub>2</sub> + 0.60<br>RCO3 + 0.6 XO2 +1.5 CO + 0.5 CO <sub>2</sub> +<br>0.05 GLY + 0.08 MGLY + 0.65 OP2 +<br>0.05 HCHO                                                                    | $2.0 \times 10^{-16}$             |          | $2.00 \times 10^{-16}$ | 30    |
| R137         | DCB2 + O <sub>3</sub> → 0.05 HO + HO <sub>2</sub> + 0.60<br>RCO3 + 0.60 XO2 +1.5 CO + 0.5 CO <sub>2</sub> +<br>0.05 GLY + 0.08 MGLY + 0.70 DCB1 +<br>0.65 OP2 + 0.05 HCHO                                                       | $2.0 \times 10^{-16}$             |          | $2.00 \times 10^{-16}$ | 30    |
| R138         | DCB3 + O <sub>3</sub> → 0.05 HO + HO <sub>2</sub> + 1.5 CO<br>+ 0.5 CO <sub>2</sub> + 0.48 GLY + 0.70 DCB1 +<br>0.25 ORA1 + 0.25 ORA2 + 0.11 PAA                                                                                | $9.0 \times 10^{-17}$             |          | $9.00 \times 10^{-17}$ | 30    |
| R139         | EPX + O <sub>3</sub> → 0.05 HO + 1.5 HO <sub>2</sub> + 1.5<br>CO + 0.5 CO <sub>2</sub> + GLY + 0.85 BALD                                                                                                                        | $1.0 \times 10^{-16}$             |          | $1.00 \times 10^{-16}$ | 20    |
| R140         | MCTO + O <sub>3</sub> → MCTP                                                                                                                                                                                                    | $2.86 \times 10^{-13}$            |          | $2.86 \times 10^{-13}$ | 9     |

**Table S2b – Continued. The RACM2 Chemical Mechanism, Thermal Reactions**

| Reaction No.                            | Reaction                                                                                                                         | A,<br>cm <sup>3</sup> s <sup>-1</sup> | E/R<br>K | k <sup>*</sup>           | Note  |
|-----------------------------------------|----------------------------------------------------------------------------------------------------------------------------------|---------------------------------------|----------|--------------------------|-------|
| <i>Stable Organics + NO<sub>3</sub></i> |                                                                                                                                  |                                       |          |                          |       |
| R141                                    | ETE + NO <sub>3</sub> → 0.80 OLNN + 0.20 OLND                                                                                    | Table S2c                             |          | 9.15 × 10 <sup>-10</sup> | 8     |
| R142                                    | OLT + NO <sub>3</sub> → 0.43 OLNN + 0.57 OLND                                                                                    | 1.79 × 10 <sup>-13</sup>              | 450      | 3.96 × 10 <sup>-14</sup> | 7     |
| R143                                    | OLI + NO <sub>3</sub> → 0.11 OLNN + 0.89 OLND                                                                                    | 8.64 × 10 <sup>-13</sup>              | -450     | 3.91 × 10 <sup>-12</sup> | 7     |
| R144                                    | DIEN + NO <sub>3</sub> → 0.90 OLNN + 0.10 OLND + 0.90 MACR                                                                       | 1.00 × 10 <sup>-13</sup>              |          | 1.00 × 10 <sup>-13</sup> | 8     |
| R145                                    | ISO + NO <sub>3</sub> → ISON                                                                                                     | 3.03 × 10 <sup>-12</sup>              | 446      | 6.79 × 10 <sup>-13</sup> | 11    |
| R146                                    | API + NO <sub>3</sub> → 0.10 OLNN + 0.90 OLND                                                                                    | 1.19 × 10 <sup>-12</sup>              | -490     | 6.16 × 10 <sup>-12</sup> | 8     |
| R147                                    | LIM + NO <sub>3</sub> → 0.71 OLNN + 0.29 OLND                                                                                    | 1.22 × 10 <sup>-11</sup>              |          | 1.22 × 10 <sup>-11</sup> | 8, 31 |
| R148                                    | HCHO + NO <sub>3</sub> → HO <sub>2</sub> + CO + HNO <sub>3</sub>                                                                 | 2.00 × 10 <sup>-12</sup>              | 2440     | 5.58 × 10 <sup>-16</sup> | 18    |
| R149                                    | ACD + NO <sub>3</sub> → ACO <sub>3</sub> + HNO <sub>3</sub>                                                                      | 1.40 × 10 <sup>-12</sup>              | 1900     | 2.39 × 10 <sup>-15</sup> | 2     |
| R150                                    | ALD + NO <sub>3</sub> → RCO <sub>3</sub> + HNO <sub>3</sub>                                                                      | 3.76 × 10 <sup>-12</sup>              | 1900     | 6.42 × 10 <sup>-15</sup> | 32    |
| R151                                    | MACR + NO <sub>3</sub> → 0.32 MACP + 0.68 XO <sub>2</sub> + 0.32 HNO <sub>3</sub> + 0.68 HCHO + 0.68 MGLY + 0.68 NO <sub>2</sub> | 3.40 × 10 <sup>-15</sup>              |          | 3.40 × 10 <sup>-12</sup> | 1, 18 |
| R152                                    | UALD + NO <sub>3</sub> → HO <sub>2</sub> + XO <sub>2</sub> + 0.668 CO + 0.332 HCHO + 0.332 ALD + ONIT                            | 5.02 × 10 <sup>-13</sup>              | 1076     | 1.36 × 10 <sup>-14</sup> | 33    |
| R153                                    | GLY + NO <sub>3</sub> → HO <sub>2</sub> + 2 CO + HNO <sub>3</sub>                                                                | 2.90 × 10 <sup>-12</sup>              | 1900     | 4.95 × 10 <sup>-15</sup> | 34    |
| R154                                    | MGLY + NO <sub>3</sub> → ACO <sub>3</sub> + CO + HNO <sub>3</sub>                                                                | 3.76 × 10 <sup>-12</sup>              | 1900     | 6.42 × 10 <sup>-15</sup> | 35    |

**Table S2b – Continued. The RACM2 Chemical Mechanism, Thermal Reactions**

| Reaction No.                                         | Reaction                                                                                                                                     | A, $\text{cm}^3 \text{s}^{-1}$ | E/R K | K*                     | Note  |
|------------------------------------------------------|----------------------------------------------------------------------------------------------------------------------------------------------|--------------------------------|-------|------------------------|-------|
| R155                                                 | PHEN + NO <sub>3</sub> → 0.4 CHO + 0.1 ADDC + 0.5 ADCN + 0.5 HNO <sub>3</sub>                                                                | $3.78 \times 10^{-12}$         |       | $3.78 \times 10^{-12}$ | 20    |
| R156                                                 | CSL + NO <sub>3</sub> → 0.4 CHO + 0.1 ADDC + 0.5 ADCN + 0.5 HNO <sub>3</sub>                                                                 | $1.06 \times 10^{-12}$         |       | $1.06 \times 10^{-12}$ | 9     |
| R157                                                 | EPX + NO <sub>3</sub> → 0.50 HO + 1.50 HO <sub>2</sub> + 1.50 CO + 0.50 CO <sub>2</sub> + GLY + 0.50 NO <sub>2</sub> + 0.50 HNO <sub>3</sub> | $2.87 \times 10^{-13}$         | 1000  | $1.00 \times 10^{-14}$ | 8, 36 |
| R158                                                 | MCT + NO <sub>3</sub> → MCTO + HNO <sub>3</sub>                                                                                              | $2.01 \times 10^{-10}$         |       | $2.01 \times 10^{-10}$ | 9     |
| R159                                                 | MPAN + NO <sub>3</sub> → MACP + NO <sub>2</sub>                                                                                              | $2.20 \times 10^{-14}$         | 500   | $4.11 \times 10^{-15}$ | 11    |
| <i>Decomposition of Intermediates From Aromatics</i> |                                                                                                                                              |                                |       |                        |       |
| R160                                                 | TR2 → 0.28 HO + 0.29 HO <sub>2</sub> + 0.28 TOLP + 0.15 PER1 + 0.28 DCB2 + 0.01 CSL + 0.28 EPX                                               | $1.00 \times 10^{+3}$          |       | $1.00 \times 10^{+3}$  | 10    |
| R161                                                 | TOLP → 0.49 HO + 0.01 HO <sub>2</sub> + 0.50 PER1 + 0.49 DCB2 + 0.01 CSL                                                                     | $1.00 \times 10^{+3}$          |       | $1.00 \times 10^{+3}$  | 10    |
| R162                                                 | XY2 → 0.158 HO + 0.308 HO <sub>2</sub> + 0.25 RCO3 + 0.308 XYLP + 0.150 PER2 + 0.224 DCB2 + 0.01 CSL + 0.84 EPX                              | $1.00 \times 10^{+3}$          |       | $1.00 \times 10^{+3}$  | 10    |
| R163                                                 | XYLP → 0.39 HO + 0.01 HO <sub>2</sub> + 0.50 PER2 + 0.49 DCB2 + 0.01 CSL                                                                     | $1.00 \times 10^{+3}$          |       | $1.00 \times 10^{+3}$  | 10    |
| R164                                                 | XYO2 → 0.158 HO + 0.308 HO <sub>2</sub> + 0.25 RCO3 + 0.308 XYLP + 0.150 PER2 + 0.224 DCB2 + 0.01 CSL + 0.84 EPX                             | $1.00 \times 10^{+3}$          |       | $1.00 \times 10^{+3}$  | 10    |
| R165                                                 | XYOP → 0.390 HO + 0.010 HO <sub>2</sub> + 0.500 PER2 + 0.490 DCB2 + 0.010 CSL                                                                | $1.00 \times 10^{+3}$          |       | $1.00 \times 10^{+3}$  | 10    |

**Table S2b – Continued. The RACM2 Chemical Mechanism, Thermal Reactions**

| Reaction No.                                           | Reaction                                                                                                                                                                                                                                                                                           | A, $\text{cm}^3 \text{s}^{-1}$ | E/R K | k*                     | Note       |
|--------------------------------------------------------|----------------------------------------------------------------------------------------------------------------------------------------------------------------------------------------------------------------------------------------------------------------------------------------------------|--------------------------------|-------|------------------------|------------|
| <i>Peroxyacetylnitrate Formation and Decomposition</i> |                                                                                                                                                                                                                                                                                                    |                                |       |                        |            |
| R166                                                   | $\text{ACO}_3 + \text{NO}_2 \rightarrow \text{PAN}$                                                                                                                                                                                                                                                | Table 2d                       |       | $8.68 \times 10^{-12}$ | 2          |
| R167                                                   | $\text{PAN} \rightarrow \text{ACO}_3 + \text{NO}_2$                                                                                                                                                                                                                                                | Table 2e                       |       | $4.76 \times 10^{-4}$  | 2          |
| R168                                                   | $\text{RCO}_3 + \text{NO}_2 \rightarrow \text{PPN}$                                                                                                                                                                                                                                                | Table 2d                       |       | $8.68 \times 10^{-12}$ | 2          |
| R169                                                   | $\text{PPN} \rightarrow \text{RCO}_3 + \text{NO}_2$                                                                                                                                                                                                                                                | Table 2e                       |       | $4.76 \times 10^{-4}$  | 2          |
| R170                                                   | $\text{MACP} + \text{NO}_2 \rightarrow \text{MPAN}$                                                                                                                                                                                                                                                | Table 2d                       |       | $5.14 \times 10^{-12}$ |            |
| R171                                                   | $\text{MPAN} \rightarrow \text{MACP} + \text{NO}_2$                                                                                                                                                                                                                                                | $1.60 \times 10^{+16}$         | 13486 | $3.63 \times 10^{-4}$  | 11, 37, 38 |
| <i>Organic Peroxy Radicals + NO</i>                    |                                                                                                                                                                                                                                                                                                    |                                |       |                        |            |
| R172                                                   | $\text{MO}_2 + \text{NO} \rightarrow \text{HO}_2 + \text{NO}_2 + \text{HCHO}$                                                                                                                                                                                                                      | $2.80 \times 10^{-12}$         | -300  | $7.66 \times 10^{-12}$ | 2          |
| R173                                                   | $\text{ETHP} + \text{NO} \rightarrow \text{HO}_2 + \text{NO}_2 + \text{ACD}$                                                                                                                                                                                                                       | $2.60 \times 10^{-12}$         | -365  | $8.84 \times 10^{-12}$ | 2          |
| R174                                                   | $\text{HC3P} + \text{NO} \rightarrow 0.66 \text{HO}_2 + 0.131 \text{MO}_2 + 0.048 \text{ETHP} + 0.089 \text{XO}_2 + 0.935 \text{NO}_2 + 0.504 \text{ACD} + 0.132 \text{ALD} + 0.165 \text{ACT} + 0.042 \text{MEK} + 0.065 \text{ONIT}$                                                             | $4.00 \times 10^{-12}$         |       | $4.00 \times 10^{-12}$ | 39         |
| R175                                                   | $\text{HC5P} + \text{NO} \rightarrow 0.200 \text{HO}_2 + 0.051 \text{MO}_2 + 0.231 \text{ETHP} + 0.235 \text{XO}_2 + 0.864 \text{NO}_2 + 0.018 \text{HCHO} + 0.045 \text{ACD} + 0.203 \text{ALD} + 0.217 \text{ACT} + 0.033 \text{MEK} + 0.039 \text{KET} + 0.272 \text{HKET} + 0.136 \text{ONIT}$ | $4.00 \times 10^{-12}$         |       | $4.00 \times 10^{-12}$ | 39         |
| R176                                                   | $\text{HC8P} + \text{NO} \rightarrow 0.606 \text{HO}_2 + 0.133 \text{ETHP} + 0.416 \text{XO}_2 + 0.739 \text{NO}_2 + 0.150 \text{ALD} + 0.642 \text{KET} + 0.261 \text{ONIT}$                                                                                                                      | $4.00 \times 10^{-12}$         |       | $4.00 \times 10^{-12}$ | 39         |
| R177                                                   | $\text{ETEP} + \text{NO} \rightarrow \text{HO}_2 + \text{NO}_2 + 1.6 \text{HCHO} + 0.2 \text{ALD}$                                                                                                                                                                                                 | $9.00 \times 10^{-12}$         |       | $9.00 \times 10^{-12}$ | 8          |

**Table S2b – Continued. The RACM2 Chemical Mechanism, Thermal Reactions**

| Reaction No. | Reaction                                                                                                                                              | A, $\text{cm}^3 \text{s}^{-1}$ | E/R K | k*                     | Note   |
|--------------|-------------------------------------------------------------------------------------------------------------------------------------------------------|--------------------------------|-------|------------------------|--------|
| R178         | OLTP + NO $\rightarrow$ 0.78 HO <sub>2</sub> + 0.97 NO <sub>2</sub> + 0.78 HCHO + 0.012 ACD + 0.44 ALD + 0.06 ACT + 0.13 MEK + 0.03 ONIT              | $4.00 \times 10^{-12}$         |       | $4.00 \times 10^{-12}$ | 39     |
| R179         | OLIP + NO $\rightarrow$ 0.83 HO <sub>2</sub> + 0.95 NO <sub>2</sub> + 0.81 ACD + 0.20 ACT + 0.68 ALD + 0.09 KET + 0.02 HKET + 0.05 ONIT               | $4.00 \times 10^{-12}$         |       | $4.00 \times 10^{-12}$ | 39     |
| R180         | BENP + NO $\rightarrow$ 0.918 HO <sub>2</sub> + 0.918 NO <sub>2</sub> + 0.459 DCB2 + 0.459 DCB3 + 0.918 GLY + 0.082 ONIT                              | $2.54 \times 10^{-12}$         | -360  | $8.50 \times 10^{-12}$ | 9      |
| R181         | TLP1 + NO $\rightarrow$ NO <sub>2</sub> + BALD                                                                                                        | $4.00 \times 10^{-12}$         |       | $4.00 \times 10^{-12}$ | 10     |
| R182         | TOLP + NO $\rightarrow$ 0.95 HO <sub>2</sub> + 0.95 NO <sub>2</sub> + 0.95 DCB2 + 0.050 ONIT                                                          | $2.70 \times 10^{-12}$         | -360  | $9.03 \times 10^{-12}$ | 10     |
| R183         | PER1 + NO $\rightarrow$ 0.5 HO <sub>2</sub> + 0.95 NO <sub>2</sub> + 0.5 BALD + 0.5 MGLY + 0.5 DCB1 + 0.05 ONIT                                       | $2.70 \times 10^{-12}$         | -360  | $9.03 \times 10^{-12}$ | 10     |
| R184         | XYL1 + NO $\rightarrow$ NO <sub>2</sub> + BALD                                                                                                        | $4.00 \times 10^{-12}$         |       | $4.00 \times 10^{-12}$ | 10     |
| R185         | XYLP + NO $\rightarrow$ 0.95 HO <sub>2</sub> + 0.95 NO <sub>2</sub> + 0.95 DCB3 + 0.050 ONIT                                                          | $2.70 \times 10^{-12}$         | -360  | $9.03 \times 10^{-12}$ | 10     |
| R186         | PER2 + NO $\rightarrow$ 0.95 HO <sub>2</sub> + 0.95 NO <sub>2</sub> + 0.95 MGLY + 0.95 DCB1 + 1.05 DCB3 + 0.05 ONIT                                   | $2.70 \times 10^{-12}$         | -360  | $9.03 \times 10^{-12}$ | 10     |
| R187         | XYOP + NO $\rightarrow$ 0.95 HO <sub>2</sub> + 0.95 NO <sub>2</sub> + 0.350 GLY + 0.600 MGLY + 0.700 DCB1 + 0.073 DCB2 + 0.177 DCB3 + 0.05 ONIT       | $2.70 \times 10^{-12}$         | -360  | $9.03 \times 10^{-12}$ | 40     |
| R188         | ISOP + NO $\rightarrow$ 0.88 HO <sub>2</sub> + 0.88 NO <sub>2</sub> + 0.2 HCHO + 0.28 MACR + 0.44 MVK + 0.12 ISON + 0.021 GLY + 0.029 HKET + 0.27 ALD | $2.43 \times 10^{-12}$         | -360  | $8.13 \times 10^{-12}$ | 11, 28 |
| R189         | APIP + NO $\rightarrow$ 0.82 HO <sub>2</sub> + 0.82 NO <sub>2</sub> + 0.23 HCHO + 0.43 ALD + 0.11 ACT + 0.44 KET + 0.07 ORA1 + 0.18 ONIT              | $4.00 \times 10^{-12}$         |       | $4.00 \times 10^{-12}$ | 8, 39  |

**Table S2b – Continued. The RACM2 Chemical Mechanism, Thermal Reactions**

| Reaction No. | Reaction                                                                                                                                   | A, $\text{cm}^3 \text{s}^{-1}$ | E/R K | k*                     | Note  |
|--------------|--------------------------------------------------------------------------------------------------------------------------------------------|--------------------------------|-------|------------------------|-------|
| R190         | LIMP + NO $\rightarrow$ HO <sub>2</sub> + NO <sub>2</sub> + 0.05 OLI + 0.43 HCHO + 0.68 UALD + 0.07 ORA1                                   | $4.00 \times 10^{-12}$         |       | $4.00 \times 10^{-12}$ | 8, 39 |
| R191         | ACO <sub>3</sub> + NO $\rightarrow$ MO <sub>2</sub> + NO <sub>2</sub>                                                                      | $8.10 \times 10^{-12}$         | -270  | $2.00 \times 10^{-11}$ | 40    |
| R192         | RCO <sub>3</sub> + NO $\rightarrow$ ETHP + NO <sub>2</sub>                                                                                 | $8.10 \times 10^{-12}$         | -270  | $2.00 \times 10^{-11}$ | 40    |
| R193         | ACTP + NO $\rightarrow$ ACO <sub>3</sub> + NO <sub>2</sub> + HCHO                                                                          | $2.90 \times 10^{-12}$         | -300  | $7.93 \times 10^{-12}$ | 2     |
| R194         | MEKP + NO $\rightarrow$ 0.67 HO <sub>2</sub> + NO <sub>2</sub> + 0.33 HCHO + 0.67 DCB1                                                     | $4.00 \times 10^{-12}$         |       | $4.00 \times 10^{-12}$ | 39    |
| R195         | KETP + NO $\rightarrow$ 0.77 HO <sub>2</sub> + 0.23 ACO <sub>3</sub> + 0.16 XO <sub>2</sub> + NO <sub>2</sub> + 0.46 ALD + 0.54 MGLY       | $4.00 \times 10^{-12}$         |       | $4.00 \times 10^{-12}$ | 41    |
| R196         | MACP + NO $\rightarrow$ 0.75 HO <sub>2</sub> + 0.25 ACO <sub>3</sub> + NO <sub>2</sub> + 0.25 CO + 0.75 HCHO + 0.50 MGLY + 0.25 HKET       | $2.54 \times 10^{-12}$         | -360  | $8.50 \times 10^{-12}$ | 11    |
| R197         | MCP + NO $\rightarrow$ NO <sub>2</sub> + 0.50 HO <sub>2</sub> + 0.50 HCHO + HKET                                                           | $2.54 \times 10^{-12}$         | -360  | $8.50 \times 10^{-12}$ |       |
| R198         | MVKP + NO $\rightarrow$ 0.3 HO <sub>2</sub> + 0.7 ACO <sub>3</sub> + 0.7 XO <sub>2</sub> + NO <sub>2</sub> + 0.3 HCHO + 0.7 ALD + 0.3 MGLY | $2.54 \times 10^{-12}$         | -360  | $8.50 \times 10^{-12}$ | 9     |
| R199         | UALP + NO $\rightarrow$ HO <sub>2</sub> + NO <sub>2</sub> + 0.61 CO + 0.03 HCHO + 0.27 ALD + 0.18 GLY + 0.7 KET + 0.21 MGLY                | $2.54 \times 10^{-12}$         | -360  | $8.50 \times 10^{-12}$ | 9     |
| R200         | BALP + NO $\rightarrow$ BAL1 + NO <sub>2</sub>                                                                                             | $4.00 \times 10^{-12}$         |       | $4.00 \times 10^{-12}$ | 21    |
| R201         | BAL1 + NO $\rightarrow$ BAL2 + NO <sub>2</sub>                                                                                             | $4.00 \times 10^{-12}$         |       | $4.00 \times 10^{-12}$ | 21    |
| R202         | ADDC + NO $\rightarrow$ HO <sub>2</sub> + NO <sub>2</sub> + 0.32 HKET + 0.68 GLY + 0.68 OP2                                                | $2.70 \times 10^{-12}$         | -360  | $9.03 \times 10^{-12}$ | 9     |
| R203         | MCTP + NO $\rightarrow$ MCTO + NO <sub>2</sub>                                                                                             | $2.70 \times 10^{-12}$         | -360  | $9.03 \times 10^{-12}$ | 9     |

**Table S2b – Continued. The RACM2 Chemical Mechanism, Thermal Reactions**

| Reaction No.                                             | Reaction                                                                                                     | A,<br>$\text{cm}^3 \text{s}^{-1}$ | E/R<br>K | k*                     | Note   |
|----------------------------------------------------------|--------------------------------------------------------------------------------------------------------------|-----------------------------------|----------|------------------------|--------|
| R204                                                     | $\text{ORAP} + \text{NO} \rightarrow \text{HO}_2 + \text{NO}_2 + \text{GLY}$                                 | $4.00 \times 10^{-12}$            |          | $4.00 \times 10^{-12}$ | 42     |
| R205                                                     | $\text{OLNN} + \text{NO} \rightarrow \text{HO}_2 + \text{NO}_2 + \text{ONIT}$                                | $4.00 \times 10^{-12}$            |          | $4.00 \times 10^{-12}$ | 41     |
| R206                                                     | $\text{OLND} + \text{NO} \rightarrow 2 \text{NO}_2 + 0.287 \text{HCHO} + 1.24 \text{ALD} + 0.464 \text{KET}$ | $4.00 \times 10^{-12}$            |          | $4.00 \times 10^{-12}$ | 41     |
| R207                                                     | $\text{ADCN} + \text{NO} \rightarrow 2 \text{NO}_2 + \text{GLY} + \text{OP2}$                                | $2.70 \times 10^{-12}$            | -360     | $9.03 \times 10^{-12}$ | 9      |
| R208                                                     | $\text{XO}_2 + \text{NO} \rightarrow \text{NO}_2$                                                            | $4.00 \times 10^{-12}$            |          | $4.00 \times 10^{-12}$ | 39     |
| <i>Organic Radical Termination with Nitrogen Dioxide</i> |                                                                                                              |                                   |          |                        |        |
| R209                                                     | $\text{BAL2} + \text{NO}_2 \rightarrow \text{ONIT}$                                                          | $2.00 \times 10^{-11}$            |          | $2.00 \times 10^{-11}$ | 20, 21 |
| R210                                                     | $\text{CHO} + \text{NO}_2 \rightarrow \text{ONIT}$                                                           | $2.00 \times 10^{-11}$            |          | $2.00 \times 10^{-11}$ | 20     |
| R211                                                     | $\text{MCTO} + \text{NO}_2 \rightarrow \text{ONIT}$                                                          | $2.08 \times 10^{-12}$            |          | $2.08 \times 10^{-12}$ | 9      |
| <i>Organic Peroxy Radicals + HO<sub>2</sub></i>          |                                                                                                              |                                   |          |                        |        |
| R212                                                     | $\text{MO}_2 + \text{HO}_2 \rightarrow \text{OP1}$                                                           | $4.10 \times 10^{-13}$            | -750     | $5.07 \times 10^{-12}$ | 2      |
| R213                                                     | $\text{ETHP} + \text{HO}_2 \rightarrow \text{OP2}$                                                           | $7.50 \times 10^{-13}$            | -700     | $7.85 \times 10^{-12}$ | 2      |
| R214                                                     | $\text{HC3P} + \text{HO}_2 \rightarrow \text{OP2}$                                                           | $1.66 \times 10^{-13}$            | -1300    | $1.30 \times 10^{-11}$ | 39     |
| R215                                                     | $\text{HC5P} + \text{HO}_2 \rightarrow \text{OP2}$                                                           | $1.66 \times 10^{-13}$            | -1300    | $1.30 \times 10^{-11}$ | 39     |
| R216                                                     | $\text{HC8P} + \text{HO}_2 \rightarrow \text{OP2}$                                                           | $1.66 \times 10^{-13}$            | -1300    | $1.30 \times 10^{-11}$ | 39     |
| R217                                                     | $\text{ETEP} + \text{HO}_2 \rightarrow \text{OP2}$                                                           | $1.90 \times 10^{-13}$            | -1300    | $1.49 \times 10^{-11}$ | 39, 43 |
| R218                                                     | $\text{OLTP} + \text{HO}_2 \rightarrow \text{OP2}$                                                           | $1.66 \times 10^{-13}$            | -1300    | $1.30 \times 10^{-11}$ | 39     |
| R219                                                     | $\text{OLIP} + \text{HO}_2 \rightarrow \text{OP2}$                                                           | $1.66 \times 10^{-13}$            | -1300    | $1.30 \times 10^{-11}$ | 39     |
| R220                                                     | $\text{BENP} + \text{HO}_2 \rightarrow \text{OP2}$                                                           | $2.91 \times 10^{-13}$            | -1300    | $2.28 \times 10^{-11}$ | 9      |

**Table S2b – Continued. The RACM2 Chemical Mechanism, Thermal Reactions**

| Reaction No. | Reaction                                                                                                             | A,<br>$\text{cm}^3 \text{s}^{-1}$ | E/R<br>K | $k^*$                  | Note |
|--------------|----------------------------------------------------------------------------------------------------------------------|-----------------------------------|----------|------------------------|------|
| R221         | TLP1 + HO <sub>2</sub> → OP2                                                                                         | $3.75 \times 10^{-13}$            | -980     | $1.00 \times 10^{-11}$ | 20   |
| R222         | TOLP + HO <sub>2</sub> → OP2                                                                                         | $3.75 \times 10^{-13}$            | -980     | $1.00 \times 10^{-11}$ | 20   |
| R223         | PER1 + HO <sub>2</sub> → OP2                                                                                         | $3.75 \times 10^{-13}$            | -980     | $1.00 \times 10^{-11}$ | 20   |
| R224         | XYL1 + HO <sub>2</sub> → OP2                                                                                         | $3.75 \times 10^{-13}$            | -980     | $1.00 \times 10^{-11}$ | 20   |
| R225         | XYLP + HO <sub>2</sub> → OP2                                                                                         | $3.75 \times 10^{-13}$            | -980     | $1.00 \times 10^{-11}$ | 20   |
| R226         | PER2 + HO <sub>2</sub> → OP2                                                                                         | $3.75 \times 10^{-13}$            | -980     | $1.00 \times 10^{-11}$ | 20   |
| R227         | XYOP + HO <sub>2</sub> → OP2                                                                                         | $3.75 \times 10^{-13}$            | -980     | $1.00 \times 10^{-11}$ | 20   |
| R228         | ISOP + HO <sub>2</sub> → ISHP                                                                                        | $2.05 \times 10^{-13}$            | -1300    | $1.60 \times 10^{-11}$ | 11   |
| R229         | APIP + HO <sub>2</sub> → OP2                                                                                         | $1.50 \times 10^{-11}$            |          | $1.50 \times 10^{-11}$ | 39   |
| R230         | LIMP + HO <sub>2</sub> → OP2                                                                                         | $1.50 \times 10^{-11}$            |          | $1.50 \times 10^{-11}$ | 39   |
| R231         | ACO <sub>3</sub> + HO <sub>2</sub> → 0.44 HO + 0.44 MO <sub>2</sub> +<br>0.44 CO <sub>2</sub> + 0.15 ORA2 + 0.41 PAA | $4.3 \times 10^{-13}$             | -1040    | $1.41 \times 10^{-11}$ | 1    |
| R232         | RCO <sub>3</sub> + HO <sub>2</sub> → 0.44 HO + 0.44 EHP +<br>0.44 CO <sub>2</sub> + 0.15 ORA2 + 0.41 PAA             | $4.3 \times 10^{-13}$             | -1040    | $1.41 \times 10^{-11}$ | 1    |
| R233         | ACTP + HO <sub>2</sub> → 0.15 HO + 0.15 ACO <sub>3</sub> +<br>0.15 HCHO + 0.850 OP2                                  | $1.15 \times 10^{-13}$            | -1300    | $9.00 \times 10^{-12}$ | 1    |
| R234         | MEKP + HO <sub>2</sub> → OP2                                                                                         | $1.15 \times 10^{-13}$            | -1300    | $9.00 \times 10^{-12}$ | 9    |
| R235         | KETP + HO <sub>2</sub> → OP2                                                                                         | $1.15 \times 10^{-13}$            | -1300    | $9.00 \times 10^{-12}$ | 39   |
| R236         | MACP + HO <sub>2</sub> → MAHP                                                                                        | $1.82 \times 10^{-13}$            | -1300    | $1.42 \times 10^{-11}$ | 11   |
| R237         | MCP + HO <sub>2</sub> → MAHP                                                                                         | $1.82 \times 10^{-13}$            | -1300    | $1.42 \times 10^{-11}$ | 11   |
| R238         | MVKP + HO <sub>2</sub> → OP2                                                                                         | $7.70 \times 10^{-14}$            | -1298    | $5.99 \times 10^{-12}$ | 9    |



**Table S2b – Continued. The RACM2 Chemical Mechanism, Thermal Reactions**

| Reaction No.                                           | Reaction                                                                                                                                                                           | A, $\text{cm}^3 \text{s}^{-1}$ | E/R K | k*                     | Note   |
|--------------------------------------------------------|------------------------------------------------------------------------------------------------------------------------------------------------------------------------------------|--------------------------------|-------|------------------------|--------|
| R239                                                   | UALP + HO <sub>2</sub> → OP2                                                                                                                                                       | $7.70 \times 10^{-14}$         | -1298 | $5.99 \times 10^{-12}$ | 9      |
| R240                                                   | ADDC + HO <sub>2</sub> → OP2                                                                                                                                                       | $3.75 \times 10^{-13}$         | -980  | $1.00 \times 10^{-11}$ | 20     |
| R241                                                   | CHO + HO <sub>2</sub> → CSL                                                                                                                                                        | $1.00 \times 10^{-11}$         |       | $1.00 \times 10^{-11}$ | 20     |
| R242                                                   | MCTP + HO <sub>2</sub> → OP2                                                                                                                                                       | $3.75 \times 10^{-13}$         | -980  | $1.00 \times 10^{-11}$ | 9      |
| R243                                                   | ORAP + HO <sub>2</sub> → ONIT                                                                                                                                                      | $1.15 \times 10^{-13}$         | -1300 | $9.00 \times 10^{-12}$ | 44     |
| R244                                                   | OLNN + HO <sub>2</sub> → ONIT                                                                                                                                                      | $1.66 \times 10^{-13}$         | -1300 | $1.30 \times 10^{-11}$ | 39     |
| R245                                                   | OLND + HO <sub>2</sub> → ONIT                                                                                                                                                      | $1.66 \times 10^{-13}$         | -1300 | $1.30 \times 10^{-11}$ | 39     |
| R246                                                   | ADCN + HO <sub>2</sub> → OP2                                                                                                                                                       | $3.75 \times 10^{-13}$         | -980  | $1.00 \times 10^{-11}$ | 9      |
| R247                                                   | XO <sub>2</sub> + HO <sub>2</sub> → OP2                                                                                                                                            | $1.66 \times 10^{-13}$         | -1300 | $1.30 \times 10^{-11}$ | 39     |
| <i>Organic Peroxy Radicals + Methyl Peroxy Radical</i> |                                                                                                                                                                                    |                                |       |                        |        |
| R248                                                   | MO <sub>2</sub> + MO <sub>2</sub> → 0.74 HO <sub>2</sub> + 1.37 HCHO + 0.63 MOH                                                                                                    | $9.50 \times 10^{-14}$         | -390  | $3.51 \times 10^{-13}$ | 19, 45 |
| R249                                                   | ETHP + MO <sub>2</sub> → HO <sub>2</sub> + 0.75 HCHO + 0.75 ACD + 0.25 MOH + 0.25 EOH                                                                                              | $1.18 \times 10^{-13}$         | -158  | $2.00 \times 10^{-13}$ | 39, 43 |
| R250                                                   | HC3P + MO <sub>2</sub> → 0.894 HO <sub>2</sub> + 0.080 MO <sub>2</sub> + 0.026 ETHP + 0.026 XO <sub>2</sub> + 0.827 HCHO + 0.198 ALD + 0.497 KET + 0.050 GLY + 0.25 MOH + 0.25 ROH | $9.46 \times 10^{-14}$         | -431  | $4.02 \times 10^{-13}$ | 39     |
| R251                                                   | HC5P + MO <sub>2</sub> → 0.842 HO <sub>2</sub> + 0.018 MO <sub>2</sub> + 0.14 ETHP + 0.191 XO <sub>2</sub> + 0.777 HCHO + 0.251 ALD + 0.618 KET + 0.25 MOH + 0.25 ROH              | $1.00 \times 10^{-13}$         | -467  | $4.79 \times 10^{-13}$ | 39     |
| R252                                                   | HC8P + MO <sub>2</sub> → 0.910 HO <sub>2</sub> + 0.090 ETHP + 0.281 XO <sub>2</sub> + 0.750 HCHO + 0.197 ALD + 0.652 KET + 0.250 MOH + 0.250 ROH                                   | $4.34 \times 10^{-14}$         | -633  | $3.63 \times 10^{-13}$ | 39     |

**Table S2b – Continued. The RACM2 Chemical Mechanism, Thermal Reactions**

| Reaction No. | Reaction                                                                                                                                   | A, $\text{cm}^3 \text{s}^{-1}$ | E/R K | k*                     | Note   |
|--------------|--------------------------------------------------------------------------------------------------------------------------------------------|--------------------------------|-------|------------------------|--------|
| R253         | ETEP + MO <sub>2</sub> → HO <sub>2</sub> + 1.95 HCHO + 0.15 ALD + 0.25 MOH + 0.25 ETEG                                                     | $1.71 \times 10^{-13}$         | -708  | $1.84 \times 10^{-12}$ | 39     |
| R254         | OLTP + MO <sub>2</sub> → HO <sub>2</sub> + 1.5 HCHO + 0.705 ALD + 0.045 KET + 0.25 MOH + 0.25 ROH                                          | $1.46 \times 10^{-13}$         | -708  | $1.57 \times 10^{-12}$ | 39     |
| R255         | OLIP + MO <sub>2</sub> → HO <sub>2</sub> + 0.750 HCHO + 1.28 ALD + 0.218 KET + 0.250 MOH + 0.250 ROH                                       | $9.18 \times 10^{-14}$         | -708  | $9.87 \times 10^{-13}$ | 39     |
| R256         | BENP + MO <sub>2</sub> → 1.6 HO <sub>2</sub> + HCHO + 0.459 DCB2 + 0.459 DCB3 + 0.6 GLY                                                    | $3.56 \times 10^{-14}$         | -708  | $3.83 \times 10^{-13}$ | 9      |
| R257         | TLP1 + MO <sub>2</sub> → HO <sub>2</sub> + HCHO + BALD                                                                                     | $3.56 \times 10^{-14}$         | -708  | $3.83 \times 10^{-13}$ | 20     |
| R258         | TOLP + MO <sub>2</sub> → 2 HO <sub>2</sub> + HCHO + 0.271 GLY + DCB2                                                                       | $3.56 \times 10^{-14}$         | -708  | $3.83 \times 10^{-13}$ | 20     |
| R259         | PER1 + MO <sub>2</sub> → 2 HO <sub>2</sub> + HCHO + MGLY + DCB1                                                                            | $3.56 \times 10^{-14}$         | -708  | $3.83 \times 10^{-13}$ | 20     |
| R260         | XYL1 + MO <sub>2</sub> → HO <sub>2</sub> + HCHO + BALD                                                                                     | $3.56 \times 10^{-14}$         | -708  | $3.83 \times 10^{-13}$ | 20     |
| R261         | XYLP + MO <sub>2</sub> → 2 HO <sub>2</sub> + HCHO + DCB2                                                                                   | $3.56 \times 10^{-14}$         | -708  | $3.83 \times 10^{-13}$ | 20     |
| R262         | PER2 + MO <sub>2</sub> → 2 HO <sub>2</sub> + HCHO + MGLY + DCB1 + 1.05 DCB3                                                                | $3.56 \times 10^{-14}$         | -708  | $3.83 \times 10^{-13}$ | 20     |
| R263         | XYOP + MO <sub>2</sub> → 2 HO <sub>2</sub> + HCHO + 0.368 GLY + 0.632 MGLY + 0.737 DCB1 + 0.077 DCB2 + 0.186 DCB3                          | $3.56 \times 10^{-14}$         | -708  | $3.83 \times 10^{-13}$ | 20     |
| R264         | ISOP + MO <sub>2</sub> → HO <sub>2</sub> + 1.31 HCHO + 0.159 MACR + 0.250 MVK + 0.250 MOH + 0.250 ROH + 0.023 ALD + 0.018 GLY + 0.016 HKET | $3.40 \times 10^{-14}$         | -221  | $7.14 \times 10^{-14}$ | 11, 28 |
| R265         | APIP + MO <sub>2</sub> → HO <sub>2</sub> + 0.75 HCHO + 0.75 ALD + 0.75 KET + 0.25 MOH + 0.25 ROH                                           | $3.56 \times 10^{-14}$         | -708  | $3.83 \times 10^{-13}$ | 39     |

**Table S2b – Continued. The RACM2 Chemical Mechanism, Thermal Reactions**

| Reaction No. | Reaction                                                                                                                                                                                                           | A, $\text{cm}^3 \text{s}^{-1}$ | E/R K | $k^*$                  | Note |
|--------------|--------------------------------------------------------------------------------------------------------------------------------------------------------------------------------------------------------------------|--------------------------------|-------|------------------------|------|
| R266         | $\text{LIMP} + \text{MO}_2 \rightarrow \text{HO}_2 + 1.04 \text{ HCHO} + 0.192 \text{ OLI} + 0.308 \text{ MACR} + 0.25 \text{ MOH} + 0.25 \text{ ROH}$                                                             | $3.56 \times 10^{-14}$         | -708  | $3.83 \times 10^{-13}$ | 39   |
| R267         | $\text{ACO}_3 + \text{MO}_2 \rightarrow 0.9 \text{ HO}_2 + 0.90 \text{ MO}_2 + 0.4 \text{ CO}_2 + \text{HCHO} + 0.1 \text{ ORA2}$                                                                                  | $2.0 \times 10^{-11}$          | -500  | $1.07 \times 10^{-10}$ | 40   |
| R268         | $\text{RCO}_3 + \text{MO}_2 \rightarrow 0.9 \text{ HO}_2 + 0.90 \text{ MO}_2 + 0.4 \text{ CO}_2 + \text{HCHO} + 0.1 \text{ ORA2}$                                                                                  | $2.0 \times 10^{-11}$          | -500  | $1.07 \times 10^{-10}$ | 40   |
| R269         | $\text{ACTP} + \text{MO}_2 \rightarrow 0.5 \text{ HO}_2 + 0.5 \text{ ACO}_3 + 1.5 \text{ HCHO} + 0.25 \text{ MOH} + 0.25 \text{ ROH} + 0.125 \text{ ORA2}$                                                         | $7.50 \times 10^{-13}$         | -500  | $4.01 \times 10^{-12}$ | 41   |
| R270         | $\text{MEKP} + \text{MO}_2 \rightarrow 0.834 \text{ HO}_2 + \text{HCHO} + 0.334 \text{ DCB1} + 0.25 \text{ MOH} + 0.25 \text{ ROH}$                                                                                | $6.91 \times 10^{-13}$         | -508  | $3.80 \times 10^{-12}$ | 39   |
| R271         | $\text{KETP} + \text{MO}_2 \rightarrow \text{HO}_2 + 0.75 \text{ HCHO} + 0.50 \text{ DCB1} + 0.25 \text{ MOH} + 0.25 \text{ ROH}$                                                                                  | $6.91 \times 10^{-13}$         | -508  | $3.80 \times 10^{-12}$ | 39   |
| R272         | $\text{MACP} + \text{MO}_2 \rightarrow 0.5 \text{ HO}_2 + 0.269 \text{ ACO}_3 + 0.5 \text{ CO} + 1.66 \text{ HCHO} + 0.250 \text{ MOH} + 0.250 \text{ ROH} + 0.067 \text{ ORA2} + 0.25 \text{ MO}_2$               | $3.40 \times 10^{-14}$         | -221  | $7.14 \times 10^{-14}$ | 11   |
| R273         | $\text{MCP} + \text{MO}_2 \rightarrow \text{NO}_2 + \text{HO}_2 + 1.5 \text{ HCHO} + .5 \text{ HKET} + .25 \text{ MOH} + .25 \text{ ROH}$                                                                          | $3.40 \times 10^{-14}$         | -221  | $7.14 \times 10^{-14}$ | 11   |
| R274         | $\text{MVKP} + \text{MO}_2 \rightarrow \text{HO}_2 + 1.16 \text{ ACO}_3 + 1.16 \text{ XO}_2 + 1.5 \text{ HCHO} + 1.75 \text{ ALD} + 0.50 \text{ MGLY} + 0.25 \text{ MOH} + 0.25 \text{ ROH} + 0.292 \text{ ORA2}$  | $3.40 \times 10^{-14}$         | -221  | $7.14 \times 10^{-14}$ | 11   |
| R275         | $\text{UALP} + \text{MO}_2 \rightarrow \text{HO}_2 + 0.305 \text{ CO} + 0.773 \text{ HCHO} + 0.203 \text{ ALD} + 0.525 \text{ KET} + 0.135 \text{ GLY} + 0.105 \text{ MGLY} + 0.25 \text{ MOH} + 0.25 \text{ ROH}$ | $3.40 \times 10^{-14}$         | -221  | $7.14 \times 10^{-14}$ | 11   |
| R276         | $\text{BALP} + \text{MO}_2 \rightarrow \text{HO}_2 + \text{BAL1} + \text{HCHO}$                                                                                                                                    | $3.56 \times 10^{-14}$         | -708  | $3.83 \times 10^{-13}$ | 39   |
| R277         | $\text{BAL1} + \text{MO}_2 \rightarrow \text{HO}_2 + \text{BAL2} + \text{HCHO}$                                                                                                                                    | $3.56 \times 10^{-14}$         | -708  | $3.83 \times 10^{-13}$ | 39   |

**Table S2b – Continued. The RACM2 Chemical Mechanism, Thermal Reactions**

| Reaction No. | Reaction                                                                                                                                                                   | A,<br>cm <sup>3</sup> s <sup>-1</sup> | E/R<br>K | k <sup>*</sup>           | Note  |
|--------------|----------------------------------------------------------------------------------------------------------------------------------------------------------------------------|---------------------------------------|----------|--------------------------|-------|
| R278         | ADDC + MO <sub>2</sub> → 2 HO <sub>2</sub> + HCHO + 0.32 HKET + 0.68 GLY + 0.68 OP2                                                                                        | 3.56 × 10 <sup>-14</sup>              | -708     | 3.83 × 10 <sup>-13</sup> | 9, 39 |
| R279         | MCTP + MO <sub>2</sub> → HO <sub>2</sub> + MCTO + HCHO                                                                                                                     | 3.56 × 10 <sup>-14</sup>              | -708     | 3.83 × 10 <sup>-13</sup> | 9, 39 |
| R280         | ORAP + MO <sub>2</sub> → HO <sub>2</sub> + HCHO + GLY                                                                                                                      | 7.50 × 10 <sup>-13</sup>              | -500     | 4.01 × 10 <sup>-12</sup> | 46    |
| R281         | OLNN + MO <sub>2</sub> → 2 HO <sub>2</sub> + HCHO + ONIT                                                                                                                   | 1.60 × 10 <sup>-13</sup>              | -708     | 1.72 × 10 <sup>-12</sup> | 39    |
| R282         | OLND + MO <sub>2</sub> → 0.50 HO <sub>2</sub> + 0.50 NO <sub>2</sub> + 0.965 HCHO + 0.93 ALD + 0.348 KET + 0.25 MOH + 0.25 ROH + 0.50 ONIT                                 | 9.68 × 10 <sup>-14</sup>              | -708     | 1.04 × 10 <sup>-12</sup> | 39    |
| R283         | ADCN + MO <sub>2</sub> → HO <sub>2</sub> + 0.7 NO <sub>2</sub> + HCHO + 0.7 GLY + 0.7 OP2 + 0.3 ONIT                                                                       | 3.56 × 10 <sup>-14</sup>              |          | 3.56 × 10 <sup>-14</sup> | 9     |
| R284         | XO <sub>2</sub> + MO <sub>2</sub> → HO <sub>2</sub> + HCHO                                                                                                                 | 5.99 × 10 <sup>-15</sup>              | -1510    | 9.48 × 10 <sup>-13</sup> | 39    |
|              | <i>Organic Peroxy Radicals + Acetyl Peroxy Radical</i>                                                                                                                     |                                       |          |                          | 39    |
| R285         | ETHP + ACO <sub>3</sub> → 0.500 HO <sub>2</sub> + 0.5 MO <sub>2</sub> + ACD + 0.5 ORA2                                                                                     | 1.03 × 10 <sup>-12</sup>              | -211     | 2.09 × 10 <sup>-12</sup> | 39    |
| R286         | HC3P + ACO <sub>3</sub> → 0.394 HO <sub>2</sub> + 0.580 MO <sub>2</sub> + 0.026 ETHP + 0.026 XO <sub>2</sub> + 0.130 HCHO + 0.273 ALD + 0.662 KET + 0.067 GLY + 0.500 ORA2 | 6.90 × 10 <sup>-13</sup>              | -460     | 3.23 × 10 <sup>-12</sup> | 39    |
| R287         | HC5P + ACO <sub>3</sub> → 0.342 HO <sub>2</sub> + 0.518 MO <sub>2</sub> + 0.140 ETHP + 0.191 XO <sub>2</sub> + 0.042 HCHO + 0.381 ALD + 0.824 KET + 0.500 ORA2             | 5.59 × 10 <sup>-13</sup>              | -522     | 3.22 × 10 <sup>-12</sup> | 39    |

**Table S2b – Continued. The RACM2 Chemical Mechanism, Thermal Reactions**

| Reaction No. | Reaction                                                                                                                                                                                                              | A,<br>$\text{cm}^3 \text{s}^{-1}$ | E/R<br>K | $k^*$                  | Note   |
|--------------|-----------------------------------------------------------------------------------------------------------------------------------------------------------------------------------------------------------------------|-----------------------------------|----------|------------------------|--------|
| R288         | $\text{HC8P} + \text{ACO}_3 \rightarrow 0.303 \text{ HO}_2 + 0.5 \text{ MO}_2 + 0.067 \text{ EHP} + 0.208 \text{ XO}_2 + 0.217 \text{ ALD} + 0.642 \text{ KET} + 0.495 \text{ ORA2}$                                  | $2.47 \times 10^{-13}$            | -683     | $2.44 \times 10^{-12}$ | 39     |
| R289         | $\text{ETEP} + \text{ACO}_3 \rightarrow 0.5 \text{ HO}_2 + 0.5 \text{ MO}_2 + 1.6 \text{ HCHO} + 0.2 \text{ ALD} + 0.5 \text{ ORA2}$                                                                                  | $9.48 \times 10^{-13}$            | -765     | $1.23 \times 10^{-11}$ | 39     |
| R290         | $\text{OLTP} + \text{ACO}_3 \rightarrow 0.50 \text{ HO}_2 + 0.50 \text{ MO}_2 + \text{HCHO} + 0.94 \text{ ALD} + 0.06 \text{ KET} + 0.50 \text{ ORA2}$                                                                | $8.11 \times 10^{-13}$            | -765     | $1.06 \times 10^{-11}$ | 39     |
| R291         | $\text{OLIP} + \text{ACO}_3 \rightarrow 0.50 \text{ HO}_2 + 0.50 \text{ MO}_2 + 1.71 \text{ ALD} + 0.29 \text{ KET} + 0.50 \text{ ORA2}$                                                                              | $5.09 \times 10^{-13}$            | -765     | $6.62 \times 10^{-12}$ | 39     |
| R292         | $\text{BENP} + \text{ACO}_3 \rightarrow 0.60 \text{ HO}_2 + \text{MO}_2 + 0.459 \text{ DCB2} + 0.458 \text{ DCB3} + 0.60 \text{ GLY}$                                                                                 | $7.40 \times 10^{-13}$            | -765     | $9.63 \times 10^{-12}$ | 9      |
| R293         | $\text{TLP1} + \text{ACO}_3 \rightarrow \text{MO}_2 + \text{BALD}$                                                                                                                                                    | $7.40 \times 10^{-13}$            | -765     | $9.63 \times 10^{-12}$ | 10     |
| R294         | $\text{TOLP} + \text{ACO}_3 \rightarrow \text{HO}_2 + \text{MO}_2 + \text{DCB2}$                                                                                                                                      | $7.40 \times 10^{-13}$            | -765     | $9.63 \times 10^{-12}$ | 10     |
| R295         | $\text{PER1} + \text{ACO}_3 \rightarrow \text{HO}_2 + \text{MO}_2 + \text{MGLY} + \text{DCB1}$                                                                                                                        | $7.40 \times 10^{-13}$            | -765     | $9.63 \times 10^{-12}$ | 10     |
| R296         | $\text{XYL1} + \text{ACO}_3 \rightarrow \text{MO}_2 + \text{BALD}$                                                                                                                                                    | $7.40 \times 10^{-13}$            | -765     | $9.63 \times 10^{-12}$ | 10     |
| R297         | $\text{XYLP} + \text{ACO}_3 \rightarrow \text{HO}_2 + \text{MO}_2 + \text{DCB2}$                                                                                                                                      | $7.40 \times 10^{-13}$            | -765     | $9.63 \times 10^{-12}$ | 10     |
| R298         | $\text{PER2} + \text{ACO}_3 \rightarrow \text{HO}_2 + \text{MO}_2 + \text{MGLY} + \text{DCB1} + 1.05 \text{ DCB3}$                                                                                                    | $7.40 \times 10^{-13}$            | -765     | $9.63 \times 10^{-12}$ | 10     |
| R299         | $\text{XYOP} + \text{ACO}_3 \rightarrow \text{HO}_2 + \text{MO}_2 + 0.368 \text{ GLY} + 0.632 \text{ MGLY} + 0.737 \text{ DCB1} + 0.077 \text{ DCB2} + 0.186 \text{ DCB3}$                                            | $7.40 \times 10^{-13}$            | -765     | $9.63 \times 10^{-12}$ | 10     |
| R300         | $\text{ISOP} + \text{ACO}_3 \rightarrow 0.5 \text{ HO}_2 + 0.5 \text{ MO}_2 + 0.75 \text{ HCHO} + 0.159 \text{ MACR} + 0.25 \text{ MVK} + 0.5 \text{ ORA2} + .031 \text{ ALD} + .024 \text{ GLY} + .033 \text{ HKET}$ | $8.40 \times 10^{-14}$            | -221     | $1.76 \times 10^{-13}$ | 11, 28 |
| R301         | $\text{APIP} + \text{ACO}_3 \rightarrow 0.5 \text{ HO}_2 + 0.5 \text{ MO}_2 + \text{ALD} + \text{KET} + \text{ORA2}$                                                                                                  | $7.40 \times 10^{-13}$            | -765     | $9.63 \times 10^{-12}$ | 39     |

**Table S2b – Continued. The RACM2 Chemical Mechanism, Thermal Reactions**

| Reaction No. | Reaction                                                                                                                                                     | A, $\text{cm}^3 \text{s}^{-1}$ | E/R K | k*                     | Note   |
|--------------|--------------------------------------------------------------------------------------------------------------------------------------------------------------|--------------------------------|-------|------------------------|--------|
| R302         | LIMP + ACO <sub>3</sub> → 0.5 HO <sub>2</sub> + 0.5 MO <sub>2</sub> + 0.192 OLI + 0.385 HCHO + 0.308 MACR + 0.5 ORA2                                         | $7.40 \times 10^{-13}$         | -765  | $9.63 \times 10^{-12}$ | 39     |
| R303         | ACO3 + ACO <sub>3</sub> → 2 MO <sub>2</sub> + 2 CO <sub>2</sub>                                                                                              | $2.50 \times 10^{-12}$         | -500  | $1.34 \times 10^{-11}$ | 47, 48 |
| R304         | RCO3 + ACO <sub>3</sub> → MO <sub>2</sub> + EHP + 2 CO <sub>2</sub>                                                                                          | $2.50 \times 10^{-12}$         | -500  | $1.34 \times 10^{-11}$ | 47, 48 |
| R305         | ACTP + ACO <sub>3</sub> → 0.50 MO <sub>2</sub> + 0.50 ACO <sub>3</sub> + HCHO + 0.75 ORA2                                                                    | $7.51 \times 10^{-13}$         | -565  | $5.00 \times 10^{-12}$ | 39, 49 |
| R306         | MEKP + ACO <sub>3</sub> → 0.33 HO <sub>2</sub> + 0.50 MO <sub>2</sub> + 0.33 HCHO + 0.334 DCB1 + 0.50 ORA2                                                   | $7.51 \times 10^{-13}$         | -565  | $5.00 \times 10^{-12}$ | 39     |
| R307         | KETP + ACO <sub>3</sub> → 0.50 HO <sub>2</sub> + 0.50 MO <sub>2</sub> + 0.50 DCB1 + 0.50 ORA2                                                                | $7.51 \times 10^{-13}$         | -565  | $5.00 \times 10^{-12}$ | 39     |
| R308         | MACP + ACO <sub>3</sub> → 0.50 HO <sub>2</sub> + 0.50 MO <sub>2</sub> + 0.167 ACO <sub>3</sub> + 0.167 CO + HCHO + 0.167 HKET + 0.33 MGLY + 0.583 ORA2       | $8.40 \times 10^{-14}$         | -221  | $1.76 \times 10^{-13}$ | 11     |
| R309         | MCP + ACO <sub>3</sub> → NO <sub>2</sub> + .5 HO <sub>2</sub> + HCHO + .5 HKET + .5 MO <sub>2</sub> + .5 ORA2                                                | $8.40 \times 10^{-14}$         | -221  | $1.76 \times 10^{-13}$ | 11     |
| R310         | MVKP + ACO <sub>3</sub> → 0.5 HO <sub>2</sub> + 0.5 MO <sub>2</sub> + 1.16 ACO <sub>3</sub> + 1.16 XO <sub>2</sub> + HCHO + 2.3 ALD + 0.50 MGLY + 1.083 ORA2 | $8.40 \times 10^{-14}$         | -221  | $1.76 \times 10^{-13}$ | 11, 50 |
| R311         | UALP + ACO <sub>3</sub> → 0.50 HO <sub>2</sub> + 0.50 MO <sub>2</sub> + 0.50 CO + 0.030 HCHO + 0.27 ALD + 0.70 KET + 0.18 GLY + 0.105 MGLY + 0.5 ORA2        | $8.40 \times 10^{-14}$         | -221  | $1.76 \times 10^{-13}$ | 50     |
| R312         | BALP + ACO <sub>3</sub> → MO <sub>2</sub> + BAL1                                                                                                             | $7.40 \times 10^{-13}$         | -765  | $9.63 \times 10^{-12}$ | 51     |
| R313         | BAL1 + ACO <sub>3</sub> → MO <sub>2</sub> + BAL2                                                                                                             | $7.40 \times 10^{-13}$         | -765  | $9.63 \times 10^{-12}$ | 51     |
| R314         | ADDC + ACO <sub>3</sub> → 2 HO <sub>2</sub> + MO <sub>2</sub> + 0.32 HKET + 0.68 GLY + 0.68 OP2                                                              | $7.40 \times 10^{-13}$         | -708  | $7.95 \times 10^{-12}$ | 20     |

**Table S2b – Continued. The RACM2 Chemical Mechanism, Thermal Reactions**

| Reaction No.                                    | Reaction                                                                                                                                                                                                                      | A,<br>cm <sup>3</sup> s <sup>-1</sup> | E/R<br>K | k <sup>*</sup>           | Note |
|-------------------------------------------------|-------------------------------------------------------------------------------------------------------------------------------------------------------------------------------------------------------------------------------|---------------------------------------|----------|--------------------------|------|
| R315                                            | MCTP + ACO <sub>3</sub> → HO <sub>2</sub> + MO <sub>2</sub> + MCTO                                                                                                                                                            | 7.40 × 10 <sup>-13</sup>              | -708     | 7.95 × 10 <sup>-12</sup> | 9    |
| R316                                            | ORAP + ACO <sub>3</sub> → MO <sub>2</sub> + GLY                                                                                                                                                                               | 7.51 × 10 <sup>-13</sup>              | -565     | 5.00 × 10 <sup>-12</sup> | 52   |
| R317                                            | OLNN + ACO <sub>3</sub> → HO <sub>2</sub> + MO <sub>2</sub> + ONIT                                                                                                                                                            | 8.85 × 10 <sup>-13</sup>              | -765     | 1.15 × 10 <sup>-11</sup> | 39   |
| R318                                            | OLND + ACO <sub>3</sub> → 0.50 MO <sub>2</sub> + NO <sub>2</sub> +<br>0.287 HCHO + 1.24 ALD + 0.464 KET<br>+ 0.50 ORA2                                                                                                        | 5.37 × 10 <sup>-13</sup>              | -765     | 6.99 × 10 <sup>-12</sup> | 39   |
| R319                                            | ADCN + ACO <sub>3</sub> → HO <sub>2</sub> + MO <sub>2</sub> + 0.7<br>NO <sub>2</sub> + 0.7 GLY + 0.7 OP2 + 0.3 ONIT                                                                                                           | 7.40 × 10 <sup>-13</sup>              | -708     | 7.95 × 10 <sup>-12</sup> | 9    |
| R320                                            | XO <sub>2</sub> + ACO <sub>3</sub> → MO <sub>2</sub>                                                                                                                                                                          | 3.40 × 10 <sup>-14</sup>              | -1560    | 6.37 × 10 <sup>-12</sup> | 39   |
| <i>Organic Peroxy Radicals + NO<sub>3</sub></i> |                                                                                                                                                                                                                               |                                       |          |                          |      |
| R321                                            | MO <sub>2</sub> + NO <sub>3</sub> → HO <sub>2</sub> + NO <sub>2</sub> + HCHO                                                                                                                                                  | 1.20 × 10 <sup>-12</sup>              |          | 1.20 × 10 <sup>-12</sup> | 39   |
| R322                                            | ETHP + NO <sub>3</sub> → HO <sub>2</sub> + NO <sub>2</sub> + ACD                                                                                                                                                              | 1.20 × 10 <sup>-12</sup>              |          | 1.20 × 10 <sup>-12</sup> | 39   |
| R323                                            | HC3P + NO <sub>3</sub> → 0.254 HO <sub>2</sub> + NO <sub>2</sub><br>+ 0.140 MO <sub>2</sub> + 0.503 ETHP + 0.092 XO <sub>2</sub><br>+ 0.095 ACT + 0.519 ACD + 0.147 ALD<br>+ 0.075 MEK                                        | 1.20 × 10 <sup>-12</sup>              |          | 1.20 × 10 <sup>-12</sup> | 39   |
| R324                                            | HC5P + NO <sub>3</sub> → 0.488 HO <sub>2</sub> + 0.055 MO <sub>2</sub><br>+ 0.28 ETHP + 0.485 XO <sub>2</sub> + NO <sub>2</sub> +<br>0.024 HCHO + 0.241 ALD + 0.06 KET<br>+ 0.063 MEK + 0.247 ACT + 0.048<br>ACD + 0.275 HKET | 1.20 × 10 <sup>-12</sup>              |          | 1.20 × 10 <sup>-12</sup> | 39   |
| R325                                            | HC8P + NO <sub>3</sub> → 0.82 HO <sub>2</sub> + 0.18 ETHP<br>+ 0.563 XO <sub>2</sub> + NO <sub>2</sub> + 0.203 ALD +<br>0.869 KET                                                                                             | 1.20 × 10 <sup>-12</sup>              |          | 1.20 × 10 <sup>-12</sup> | 39   |
| R326                                            | ETEP + NO <sub>3</sub> → HO <sub>2</sub> + NO <sub>2</sub> + 1.6<br>HCHO + 0.2 ALD                                                                                                                                            | 1.20 × 10 <sup>-12</sup>              |          | 1.20 × 10 <sup>-12</sup> | 39   |
| R327                                            | OLTP + NO <sub>3</sub> → 0.79 HO <sub>2</sub> + NO <sub>2</sub> + 0.79<br>HCHO + 0.47 ALD + 0.09 ACT + 0.02<br>ACD + 0.18 MEK                                                                                                 | 1.20 × 10 <sup>-12</sup>              |          | 1.20 × 10 <sup>-12</sup> | 39   |

**Table S2b – Continued. The RACM2 Chemical Mechanism, Thermal Reactions**

| Reaction No. | Reaction                                                                                                                               | A,<br>cm <sup>3</sup> s <sup>-1</sup> | E/R<br>K | k <sup>*</sup>           | Note   |
|--------------|----------------------------------------------------------------------------------------------------------------------------------------|---------------------------------------|----------|--------------------------|--------|
| R328         | OLIP + NO <sub>3</sub> → 0.86 HO <sub>2</sub> + NO <sub>2</sub> + 0.72<br>ALD + 0.20 ACT + 0.85 ACD + 0.04<br>HKET + 0.11 KET          | 1.20 × 10 <sup>-12</sup>              |          | 1.20 × 10 <sup>-12</sup> | 39     |
| R329         | BENP + NO <sub>3</sub> → HO <sub>2</sub> + NO <sub>2</sub> + 0.50<br>DCB2 + 0.50 DCB3 + GLY                                            | 1.20 × 10 <sup>-12</sup>              |          | 1.20 × 10 <sup>-12</sup> | 9      |
| R330         | TLP1 + NO <sub>3</sub> → NO <sub>2</sub> + BALD                                                                                        | 1.20 × 10 <sup>-12</sup>              |          | 1.20 × 10 <sup>-12</sup> | 10     |
| R331         | TOLP + NO <sub>3</sub> → HO <sub>2</sub> + NO <sub>2</sub> + DCB2                                                                      | 1.20 × 10 <sup>-12</sup>              |          | 1.20 × 10 <sup>-12</sup> | 10     |
| R332         | PER1 + NO <sub>3</sub> → 0.5 HO <sub>2</sub> + NO <sub>2</sub> + 0.5<br>MGLY + 0.5 DCB1 + 0.5 BALD                                     | 1.20 × 10 <sup>-12</sup>              |          | 1.20 × 10 <sup>-12</sup> | 10     |
| R333         | XYL1 + NO <sub>3</sub> → NO <sub>2</sub> + BALD                                                                                        | 1.20 × 10 <sup>-12</sup>              |          | 1.20 × 10 <sup>-12</sup> | 10     |
| R334         | XYLP + NO <sub>3</sub> → HO <sub>2</sub> + NO <sub>2</sub> + DCB3                                                                      | 1.20 × 10 <sup>-12</sup>              |          | 1.20 × 10 <sup>-12</sup> | 10     |
| R335         | PER2 + NO <sub>3</sub> → HO <sub>2</sub> + NO <sub>2</sub> + MGLY +<br>DCB1 + 1.05 DCB3                                                | 1.20 × 10 <sup>-12</sup>              |          | 1.20 × 10 <sup>-12</sup> | 10     |
| R336         | XYOP + NO <sub>3</sub> → HO <sub>2</sub> + NO <sub>2</sub> + 0.368<br>GLY + 0.632 MGLY + 0.737 DCB1 +<br>0.077 DCB2 + 0.186 DCB3       | 1.20 × 10 <sup>-12</sup>              |          | 1.20 × 10 <sup>-12</sup> | 20     |
| R337         | ISOP + NO <sub>3</sub> → HO <sub>2</sub> + NO <sub>2</sub> + 0.75<br>HCHO + 0.318 MACR + 0.5 MVK +<br>0.024 GLY + .033 HKET + .031 ALD | 1.20 × 10 <sup>-12</sup>              |          | 1.20 × 10 <sup>-12</sup> | 11, 28 |
| R338         | APIP + NO <sub>3</sub> → HO <sub>2</sub> + NO <sub>2</sub> + ALD +<br>KET                                                              | 1.20 × 10 <sup>-12</sup>              |          | 1.20 × 10 <sup>-12</sup> | 39     |
| R339         | LIMP + NO <sub>3</sub> → HO <sub>2</sub> + NO <sub>2</sub> + 0.385 OLI<br>+ 0.385 HCHO + 0.615 MACR                                    | 1.20 × 10 <sup>-12</sup>              |          | 1.20 × 10 <sup>-12</sup> | 39     |
| R340         | ACO <sub>3</sub> + NO <sub>3</sub> → MO <sub>2</sub> + NO <sub>2</sub>                                                                 | 4.00 × 10 <sup>-12</sup>              |          | 4.00 × 10 <sup>-12</sup> | 39, 53 |
| R341         | RCO <sub>3</sub> + NO <sub>3</sub> → ETHP + NO <sub>2</sub>                                                                            | 4.00 × 10 <sup>-12</sup>              |          | 4.00 × 10 <sup>-12</sup> | 39, 53 |



**Table S2b – Continued. The RACM2 Chemical Mechanism, Thermal Reactions**

| Reaction No. | Reaction                                                                                                                                | A,<br>cm <sup>3</sup> s <sup>-1</sup> | E/R<br>K | k <sup>*</sup>           | Note |
|--------------|-----------------------------------------------------------------------------------------------------------------------------------------|---------------------------------------|----------|--------------------------|------|
| R342         | ACTP + NO <sub>3</sub> → ACO <sub>3</sub> + NO <sub>2</sub> + HCHO                                                                      | 1.20 × 10 <sup>-12</sup>              |          | 1.20 × 10 <sup>-12</sup> | 39   |
| R343         | MEKP + NO <sub>3</sub> → 0.67 HO <sub>2</sub> + NO <sub>2</sub> + 0.33 HCHO + 0.67 DCB1                                                 | 1.20 × 10 <sup>-12</sup>              |          | 1.20 × 10 <sup>-12</sup> | 39   |
| R344         | KETP + NO <sub>3</sub> → HO <sub>2</sub> + NO <sub>2</sub> + DCB1                                                                       | 1.20 × 10 <sup>-12</sup>              |          | 1.20 × 10 <sup>-12</sup> | 39   |
| R345         | MACP + NO <sub>3</sub> → HO <sub>2</sub> + 0.33 ACO <sub>3</sub> + NO <sub>2</sub> + 0.33 CO + HCHO + 0.33 HKET + 0.667 MGLY            | 1.20 × 10 <sup>-12</sup>              |          | 1.20 × 10 <sup>-12</sup> | 11   |
| R346         | MCP + NO <sub>3</sub> → NO <sub>2</sub> + HO <sub>2</sub> + HCHO HKET                                                                   | 1.20 × 10 <sup>-12</sup>              |          | 1.20 × 10 <sup>-12</sup> | 49   |
| R347         | MVKP + NO <sub>3</sub> → 0.3 HO <sub>2</sub> + 0.7 ACO <sub>3</sub> + 0.7 XO <sub>2</sub> + NO <sub>2</sub> + 0.3 HCHO + 0.7 ALD + MGLY | 1.20 × 10 <sup>-12</sup>              |          | 1.20 × 10 <sup>-12</sup> | 9    |
| R348         | UALP + NO <sub>3</sub> → HO <sub>2</sub> + NO <sub>2</sub> + 0.61 CO + 0.03 HCHO + 0.27 ALD + 0.7 KET + 0.18 GLY + 0.21 MGLY            | 1.20 × 10 <sup>-12</sup>              |          | 1.20 × 10 <sup>-12</sup> | 9    |
| R349         | BALP + NO <sub>3</sub> → BAL1 + NO <sub>2</sub>                                                                                         | 1.20 × 10 <sup>-12</sup>              |          | 1.20 × 10 <sup>-12</sup> | 9    |
| R350         | BAL1 + NO <sub>3</sub> → BAL2 + NO <sub>2</sub>                                                                                         | 1.20 × 10 <sup>-12</sup>              |          | 1.20 × 10 <sup>-12</sup> | 9    |
| R351         | ADDC + NO <sub>3</sub> → HO <sub>2</sub> + NO <sub>2</sub> + 0.32 HKET + 0.68 GLY + 0.68 OP2                                            | 1.20 × 10 <sup>-12</sup>              |          | 1.20 × 10 <sup>-12</sup> | 9    |
| R352         | MCTP + NO <sub>3</sub> → NO <sub>2</sub> + MCTO                                                                                         | 1.20 × 10 <sup>-12</sup>              |          | 1.20 × 10 <sup>-12</sup> | 39   |
| R353         | ORAP + NO <sub>3</sub> → HO <sub>2</sub> + NO <sub>2</sub> + GLY                                                                        | 1.20 × 10 <sup>-12</sup>              |          | 1.20 × 10 <sup>-12</sup> | 39   |
| R354         | OLNN + NO <sub>3</sub> → HO <sub>2</sub> + NO <sub>2</sub> + ONIT                                                                       | 1.20 × 10 <sup>-12</sup>              |          | 1.20 × 10 <sup>-12</sup> | 39   |
| R355         | OLND + NO <sub>3</sub> → 2 NO <sub>2</sub> + 0.287 HCHO + 1.24 ALD + 0.464 KET                                                          | 1.20 × 10 <sup>-12</sup>              |          | 1.20 × 10 <sup>-12</sup> | 39   |
| R356         | ADCN + NO <sub>3</sub> → 2 NO <sub>2</sub> + GLY + OP2                                                                                  | 1.20 × 10 <sup>-12</sup>              |          | 1.20 × 10 <sup>-12</sup> | 9    |

**Table S2b – Continued. The RACM2 Chemical Mechanism, Thermal Reactions**

| Reaction No. | Reaction                                                                                                   | A,<br>cm <sup>3</sup> s <sup>-1</sup> | E/R<br>K | K*                       | Note   |
|--------------|------------------------------------------------------------------------------------------------------------|---------------------------------------|----------|--------------------------|--------|
| R357         | XO <sub>2</sub> + NO <sub>3</sub> → NO <sub>2</sub>                                                        | 1.20 × 10 <sup>-12</sup>              |          | 1.20 × 10 <sup>-12</sup> | 39     |
|              | <i>Self Reaction of RCO3 Radical</i>                                                                       |                                       |          |                          |        |
| R358         | RCO <sub>3</sub> + RCO <sub>3</sub> → 2 ETHP + 2 CO <sub>2</sub>                                           |                                       |          |                          | 40, 47 |
|              | <i>Organic Nitrate Radical Cross Reactions</i>                                                             |                                       |          |                          |        |
| R359         | OLNN + OLNN → HO <sub>2</sub> + 2 ONIT                                                                     | 7.00 × 10 <sup>-14</sup>              | -1000    | 2.00 × 10 <sup>-12</sup> | 39     |
| R360         | OLNN + OLND → 0.50 HO <sub>2</sub> + 0.50 NO <sub>2</sub> + 0.202 HCHO + 0.640 ALD + 0.149 KET + 1.50 ONIT | 4.25 × 10 <sup>-14</sup>              | -1000    | 1.22 × 10 <sup>-12</sup> | 39     |
| R361         | OLND + OLND → NO <sub>2</sub> + 0.504 HCHO + 1.21 ALD + 0.285 KET + ONIT                                   | 2.96 × 10 <sup>-14</sup>              | -1000    | 8.47 × 10 <sup>-13</sup> | 39     |
|              | <i>Operator Radical + Operator Radical</i>                                                                 |                                       |          |                          |        |
| R362         | XO <sub>2</sub> + XO <sub>2</sub> →                                                                        | 7.13 × 10 <sup>-17</sup>              | -2950    | 1.41 × 10 <sup>-12</sup> | 39     |
|              | <i>Operator Radical + RCO3 Radical</i>                                                                     |                                       |          |                          |        |
| R363         | XO <sub>2</sub> + RCO <sub>3</sub> → ETHP + CO <sub>2</sub>                                                | 2.50 × 10 <sup>-12</sup>              | -500     | 1.34 × 10 <sup>-11</sup> | 40, 47 |

The rate constants are calculated for 298 K and 1 atm. The units for first order reactions are s<sup>-1</sup>, second order rate constants are cm<sup>3</sup> s<sup>-1</sup> and for third order the units are cm<sup>6</sup> s<sup>-1</sup>.

Note 1: IUPAC Web version [January 2010]; Note 2: Sander et al. [2011]; Note 3: Uselman et al. In Nitrogeous Air Pollutants, Chemical and Biological Implications, 1979; Note 4: Rate constants used for aggregated species taken from Atkinson, 2003; El Boudali et al., 2001; IUPAC 2010; Talukdar et al., 1994.; Note 5: Rate constants used for aggregated species taken from Veillerot et al., 1996; El Boudali et al., 1996; Picquet et al., 1998; Wilson et al., 2006; Note 6: Rate constants used for aggregated species taken from Wilson et al., 2006, Atkinson, 2003 and Aschmann and Atkinson, 1998; Note 7: no change from RACM1; Note 8: Atkinson and Arey, 2003; Note 9: MCM V3.2; Note 10: Calvert et al., 2002; Note 11: Geiger et al., 2003; Note 12: Gill and Hites, 2002; Note 13: Sivakumaran and Crowley, 2003; Note 14: Gierczak et al., 2003; Note 15: Wallington and Kurylo, 1987; Note 16: Orlando et al., 1999; Note 17: Magneron et al., 2002; Note 18: Atkinson et al., 2006; Note 19: Tyndall et al., 1995; Note 20: Carter, 2010; Note 21: Ferri et al., 2001 and Semadeni et al., 1995; Note 22: Aschmann and Atkinson,

1998; Note 23: Estimated for propyl hydroperoxide ; Note 24: Singleton et al., 1988; Note 25: Butkovskaya et al., 2004 and De Smedt et al., 2005; Note 26: Assumed the same as OP1 + HO; Note 27: Orlando et al., 2002; Note 28: Rate constant is average of Grosjean and Grosjean, 1998 and Sato et al., 2004; MVK, MACR and ISON from Sprengnether et al. 2002, small compounds from Galloway et al. 2011; Note 29: MACR-MVK split according to Carter, 1996; Note 30: Determined by fitting model simulations to chamber data. Experiment EC331 (toluene + n-butane) was used; Note 31: Rate constant from Atkinson and Arey 2003 and products from Spittler et al., 2006; Note 32: Based on propanal. The E/R of ACD together with the recommended  $k(298)$  for propanal was used to determine the A factor for ALD; Note 33: Rate constant take to be  $2 \cdot k_{\text{ALD}} - k_{\text{ETH}}$ ; E/R same as ALD + NO<sub>3</sub>; Note 34: Salgado et al., 2008; Note 35: assumed the same as ALD + NO<sub>3</sub>; Note 36: Rate from Bierbach et al., 1994, Products from DCB1 + O<sub>3</sub>; Note 37: Kirchner and Stockwell, 1996; Note 38: using RACM1 product yields and dividing DCB value among DCB1,2,3; Note 33: Tyndall et al., 2001; Note 39: Roberts and Bertman, 1992; Note 40: Carter and Atkinson, 1996; Note 41: Rate from HCP3 + NO; Note 42: Rate from ACTP + NO; Note 43: Lebras, 1997; Note 44: Rate from ACTP + HO<sub>2</sub>; Note 45: Same as ACTP + MO<sub>2</sub>; Note 46: Lightfoot, 1992; Note 47: Tyndall et al., 2001; Note 48: Bridier et al., 1993; Note 49: Rate constant from GEOS-CHEM version 5-07-8; Note 50: Rate assumed same as MVKP+ACO<sub>3</sub>; Note 51: Rate constant assumed same as TOLP+ACO<sub>3</sub>; Note 52: Rate assumed same as ACTP+ACO<sub>3</sub>; Note 53: Wayne, 2000.

**Table S2c. The RACM2 Chemical Mechanism: Reaction Rate Constants of the Form  $k = T^2 C \exp(-D/T)$**

| Reaction No. | Reaction                                                                     | C<br>$\text{K}^{-2} \text{cm}^3 \text{s}^{-1}$ | D<br>K | Note |
|--------------|------------------------------------------------------------------------------|------------------------------------------------|--------|------|
| R137         | $\text{ETE} + \text{NO}_3 \rightarrow 0.80 \text{ OLNN} + 0.20 \text{ OLND}$ | $4.88 \times 10^{-18}$                         | 2282   | 1    |

Note 1: Atkinson and Arey, 2003

**Table S2d. The RACM2 Chemical Mechanism: Troe Reaction Parameters**

| Reaction No. | Reaction                                                                                                                           | $k_o^{300}$<br>$\text{cm}^6 \text{s}^{-1}$ | n   | $k_\infty^{300}$<br>$\text{cm}^3 \text{s}^{-1}$ | m    | Note |
|--------------|------------------------------------------------------------------------------------------------------------------------------------|--------------------------------------------|-----|-------------------------------------------------|------|------|
| R48          | $\text{NO} + \text{O}^3\text{P} \rightarrow \text{NO}_2$                                                                           | $9.00 \times 10^{-32}$                     | 1.5 | $3.00 \times 10^{-11}$                          | 0    | 1    |
| R49          | $\text{NO} + \text{HO} \rightarrow \text{HONO}$                                                                                    | $7.00 \times 10^{-31}$                     | 2.6 | $3.60 \times 10^{-11}$                          | 0.1  | 1    |
| R54          | $\text{NO}_2 + \text{O}^3\text{P} \rightarrow \text{NO}_3$                                                                         | $2.50 \times 10^{-31}$                     | 1.8 | $2.20 \times 10^{-11}$                          | 0.7  | 1    |
| R55          | $\text{NO}_2 + \text{HO} \rightarrow \text{HNO}_3$                                                                                 | $1.80 \times 10^{-30}$                     | 3.0 | $2.80 \times 10^{-11}$                          | 0    | 1    |
| R62          | $\text{NO}_3 + \text{NO}_2 \rightarrow \text{N}_2\text{O}_5$                                                                       | $2.00 \times 10^{-30}$                     | 4.4 | $1.40 \times 10^{-12}$                          | 0.7  | 1    |
| R65          | $\text{NO}_2 + \text{HO}_2 \rightarrow \text{HNO}_4$                                                                               | $2.0 \times 10^{-31}$                      | 3.4 | $2.90 \times 10^{-12}$                          | 1.1  | 1    |
| R68          | $\text{SO}_2 + \text{HO} \rightarrow \text{SULF} + \text{HO}_2$                                                                    | $3.30 \times 10^{-31}$                     | 4.3 | $1.60 \times 10^{-12}$                          | 0    | 1    |
| R75          | $\text{ETE} + \text{HO} \rightarrow \text{ETEP}$                                                                                   | $1.00 \times 10^{-28}$                     | 4.5 | $8.80 \times 10^{-12}$                          | 0.85 | 1    |
| R79          | $\text{ACE} + \text{HO} \rightarrow 0.65 \text{ HO} + 0.35 \text{ HO}_2 + 0.35 \text{ CO} + 0.650 \text{ GLY} + 0.35 \text{ ORA1}$ | $5.50 \times 10^{-30}$                     | 0.0 | $8.30 \times 10^{-13}$                          | -2.0 | 1    |
| R164         | $\text{ACO}_3 + \text{NO}_2 \rightarrow \text{PAN}$                                                                                | $9.70 \times 10^{-29}$                     | 5.6 | $9.30 \times 10^{-12}$                          | 1.5  | 1    |
| R166         | $\text{RCO}_3 + \text{NO}_2 \rightarrow \text{PPN}$                                                                                | $9.70 \times 10^{-29}$                     | 5.6 | $9.30 \times 10^{-12}$                          | 1.5  | 1    |

Note 1, Sander et al. [2011]

**Table S2e. The RACM2 Chemical Mechanism: Troe Equilibrium Reactions**

| Reaction No. | Reaction                                                     | A                      | B      | $k_o^{300}$<br>$\text{cm}^6 \text{s}^{-1}$ | n   | $k_\infty^{300}$<br>$\text{cm}^3 \text{s}^{-1}$ | m   | Note |
|--------------|--------------------------------------------------------------|------------------------|--------|--------------------------------------------|-----|-------------------------------------------------|-----|------|
| R63          | $\text{N}_2\text{O}_5 \rightarrow \text{NO}_2 + \text{NO}_3$ | $3.70 \times 10^{+26}$ | 11,000 | $2.20 \times 10^{-30}$                     | 3.9 | $1.50 \times 10^{-12}$                          | 0.7 | 1    |
| R66          | $\text{HNO}_4 \rightarrow \text{HO}_2 + \text{NO}_2$         | $4.76 \times 10^{+26}$ | 10,900 | $2.00 \times 10^{-31}$                     | 3.4 | $2.90 \times 10^{-12}$                          | 1.1 | 1    |
| R165         | $\text{PAN} \rightarrow \text{ACO}_3 + \text{NO}_2$          | $1.16 \times 10^{+28}$ | 13,954 | $9.70 \times 10^{-29}$                     | 5.6 | $9.30 \times 10^{-12}$                          | 1.5 | 1    |
| R167         | $\text{PPN} \rightarrow \text{RCO}_3 + \text{NO}_2$          | $1.16 \times 10^{+28}$ | 13,954 | $9.70 \times 10^{-29}$                     | 5.6 | $9.30 \times 10^{-12}$                          | 1.5 | 1    |

Note 1, Sander et al. [2011]

**Table S2f. The RACM2 Chemical Mechanism: Reactions With Special Rate Expressions**

| Reaction No. | Reaction                                                                                                | Rate Constant Expression <sup>a</sup><br>$\text{cm}^3 \text{s}^{-1}$                                                                                                                                                             | Note |
|--------------|---------------------------------------------------------------------------------------------------------|----------------------------------------------------------------------------------------------------------------------------------------------------------------------------------------------------------------------------------|------|
| R38          | $\text{O}^3\text{P} + \text{O}_2 \rightarrow \text{O}_3$                                                | $[\text{M}] \times 5.60 \times 10^{-34} \times (\text{T}/300)^{**(-2.6)}$                                                                                                                                                        | 1    |
| R45          | $2 \text{HO}_2 \rightarrow \text{H}_2\text{O}_2 + \text{O}_2$                                           | $2.2 \times 10^{-13} \times \exp(600/\text{T}) + 1.90 \times 10^{-33} \times [\text{M}] \times \exp(980/\text{T})$                                                                                                               | 1    |
| R46          | $2 \text{HO}_2 + \text{H}_2\text{O} \rightarrow \text{H}_2\text{O}_2 + \text{H}_2\text{O} + \text{O}_2$ | $3.08 \times 10^{-34} \times \exp(2800/\text{T}) + 2.59 \times 10^{-54} \times [\text{M}] \times \exp(3180/\text{T})$                                                                                                            | 1    |
| R51          | $\text{NO} + \text{HO}_2 \rightarrow \text{HNO}_3$                                                      | $k_1 = 3.45\text{e-}12 \times \exp(270/\text{T})$<br>$k_2 = (530/\text{Y}) + (4.8 \times 10^{-6}) \times \text{pressure} - 1.73$<br>$k = k_1 \times k_2 / 100$                                                                   | 1    |
| R56          | $\text{HNO}_3 + \text{HO} \rightarrow \text{NO}_3 + \text{H}_2\text{O}$                                 | $k = k_0 + k_3 / (1 + k_3 / k_2)$<br>$k_0 = 2.4 \times 10^{-14} \times \exp(460/\text{T})$<br>$k_2 = 2.4 \times 10^{-17} \times \exp(2199/\text{T})$<br>$k_3 = 6.5 \times 10^{-34} \times \exp(1335/\text{T}) \times [\text{M}]$ | 1    |

|     |                                                                       |                                                                                |   |
|-----|-----------------------------------------------------------------------|--------------------------------------------------------------------------------|---|
| R69 | $\text{CO} + \text{HO} \rightarrow \text{HO}_2 + \text{CO}_2$         | $1.44 \times 10^{-13} \times (1. + 0.8 \times [\text{M}] / 4 \times 10^{+19})$ | 1 |
| R90 | $\text{ACT} + \text{HO} \rightarrow \text{ACTP} + \text{H}_2\text{O}$ | $1.39 \times 10^{-13} + 3.72 \times 10^{-11} \times \exp(-2044/T)$             | 2 |

Note 1, IUPAC Web version [January 2010]

Note 2: Gierczak et al., 2003

<sup>a</sup>The unit of T is K. The units for second order rate constants are  $\text{cm}^3 \text{s}^{-1}$  and for third order the units are  $\text{cm}^6 \text{s}^{-1}$ . Pressure is in units of Pascal. For all of the above, [M] is the concentration of air in molecules  $\text{cm}^3$ .

## Comparison of RACM1 and RACM2 Mechanisms for “Real Atmosphere” Cases

Box-model simulations made with the RACM1 and RACM2 were compared to provide an assessment of their differences in calculated ozone,  $\text{HNO}_3$ ,  $\text{H}_2\text{SO}_4$ , PAN,  $\text{H}_2\text{O}_2$  and HCHO. The simulations were made based on the urban case discussed in [Stockwell et al., 2012]. The two-day simulations were made for surface conditions with a pressure of 1 atmosphere, a temperature of 298 K and a relative humidity of 50%, Table S3. Physical losses, such as deposition, of ozone,  $\text{HNO}_3$ ,  $\text{H}_2\text{O}_2$ ,  $\text{H}_2\text{SO}_4$  etc. were not included because the purpose was to compare their chemical production by the two mechanisms.

The initial ozone concentration was taken to be a near background value of 30 ppb for all simulations. The photolysis rate coefficients were calculated for a latitude of  $40^\circ$  at summer solstice. The photolysis rate coefficients for the photochemical reactions of both mechanisms were calculated using the delta-Eddington radiative transfer model. To make the simulations as equivalent as possible the revised photolysis rate coefficients for the RACM2 mechanism were used for both mechanisms or they were mapped from the RACM2 mechanism to those of RACM1 as appropriate.

The initial conditions consisted of four inorganic variations, Table S4, and four organic variations, Table S5. The four inorganic variations were run with the four organic variations for a total of sixteen simulations. The sixteen simulations represent a wide range of initial conditions. Although not all combinations are representative of typical conditions, the simulations provide an extensive comparison of the two mechanisms.

For the inorganic variations A, B and C represent somewhat aged air masses that range from rural to moderately polluted while case D represents a polluted case with fresh emissions. For the inorganic variations A, B and C the initial carbon monoxide concentration was 100 ppb and D was 1000 ppb. The initial  $\text{SO}_2$  was taken similarly to be 5 ppb for A, B and C and increased to 30 ppb for case D. The NO and  $\text{NO}_2$  concentrations were varied from case A in multiples of 5 and 10 to give cases B and C and in Case D the initial  $\text{NO}_x$  was 10 ppb with a NO/ $\text{NO}_2$  ratio of 4.

The initial organic mixture is a relatively realistic mixture based on measurements made at Howard University’s atmospheric field site near Beltsville, Maryland [Stockwell et al., 2012]. Table S5 shows the initial organic mixing ratios used for the simulations. The NMOC2 column represents an approximation to the Beltsville measurements and in general the NMOC1, NMOC3 and NMOC4 represent multiples of 0.1, 5 and 10 of NMOC2. The total organic mixing ratios were 19.09, 190.9, 954.5 and 1909 ppbC for NMOC1, NMOC2, NMOC3 and NMOC4, respectively. These when combined with the inorganic variations lead to a wide range of VOC to  $\text{NO}_x$  ratios, Table S6. These ratios are not always typical of atmospheric conditions but provide a wide range of conditions for comparing RACM1 and RACM2.

Tables S7 and S8 show the peak ozone simulated by the two mechanisms. The maximum ozone is 30.00 ppb for RACM1 and RACM2 in cases NMOC1-C and NMOC1-D and for RACM2 in case NMOC-D because the mechanisms yielded a net ozone loss from the 30.00 ppb initial conditions. Otherwise the

tables show that RACM2 predicts lower ozone concentrations than RACM1 for most of the simulations. Figure S1 shows that the RACM2 mechanism forecasts less ozone than RACM1 for most of the initial conditions simulated and that this trend to lower predictions increases at the higher ozone mixing ratios.

RACM2 forecasts less  $\text{HNO}_3$  than RACM1, Figure S2. This indicated that there is less reactive nitrogen available for ozone and  $\text{HNO}_3$  formation in the RACM2 simulations than in the RACM1 simulations. The tendency of RACM2 to produce less ozone and  $\text{HNO}_3$  than RACM1 is consistent with the forecasted mixing ratios of PAN, Figure S3. The formation of PAN removes  $\text{NO}_2$  and acetyl-peroxy radicals from the system. The higher mixing ratios of PAN suggest that RACM2 has lower levels of  $\text{NO}_x$  available for ozone formation under the more polluted conditions. The lower levels of  $\text{NO}_x$  in RACM2 forecasts lead also to higher mixing ratios of hydrogen peroxide forecasted by RACM2 than RACM1, Figure S4.

RACM2 forecasts more HCHO than RACM1; this may be due to the greater level of detail of the organic chemistry in RACM2, Figure S5. Although the photolysis of HCHO produces  $\text{HO}_2$ ; the two mechanisms predict almost the same mixing ratios of  $\text{H}_2\text{SO}_4$ . The mixing ratio of  $\text{H}_2\text{SO}_4$  is indicative of integrated hydroxyl concentrations. This agreement indicates that there is considerable agreement for the integrated hydroxyl concentrations between the two mechanisms, Figure S6.

**Table S3.** Conditions used for all simulations.

| <b>Initial Condition</b>        | <b>Value</b> |
|---------------------------------|--------------|
| Start-Time                      | 6:00         |
| Duration                        | 48 hr        |
| Temperature                     | 298.15 K     |
| Pressure                        | 1013.25 mbar |
| Date for photolysis calculation | June 21      |
| Latitude                        | 40°          |
| <b><u>Mixing Ratio</u></b>      |              |
| $\text{H}_2\text{O}$            | 15500 ppm    |
| Methane                         | 1800. ppb    |
| $\text{H}_2$                    | 550 ppb      |
| $\text{O}_3$                    | 30 ppb       |

**Table S4.** Inorganic initial concentrations as varied in simulations.

| Case             | A     | B     | C     | D     |
|------------------|-------|-------|-------|-------|
|                  | (ppb) | (ppb) | (ppb) | (ppb) |
| Carbon Monoxide  | 100.  | 100.  | 100.  | 1000. |
| Nitric Oxide     | 0.1   | 0.5   | 1.0   | 8.0   |
| Nitrogen Dioxide | 0.4   | 2.0   | 4.0   | 2.0   |
| Sulfur Dioxide   | 5.0   | 5.0   | 5.0   | 30.0  |



**Table S5.** Non-methane organic compound initial concentrations as varied in simulations.

|                         | NMOC1<br>(ppb) | NMOC2<br>(ppb) | NMOC3<br>(ppb) | NMOC4<br>(ppb) |
|-------------------------|----------------|----------------|----------------|----------------|
| Ethane                  | 0.30           | 3.0            | 15.0           | 30.            |
| Slow Reacting Alkanes   | 1.00           | 10.            | 50.0           | 100.           |
| Medium Reacting Alkanes | 0.25           | 2.5            | 12.5           | 25.            |
| Fast Reacting Alkanes   | 0.15           | 1.5            | 7.50           | 15.            |
| Ethene                  | 0.20           | 2.0            | 10.0           | 20.            |
| Internal Alkenes        | 0.10           | 1.0            | 5.0            | 10.            |
| Terminal Alkenes        | 0.20           | 2.0            | 10.0           | 20.            |
| Dienes                  | 0.05           | 0.5            | 2.5            | 5.             |
| Benzene                 | 0.09           | 0.9            | 4.5            | 9.             |
| Toluene                 | 0.20           | 2.0            | 10.0           | 20.            |
| Xylene                  | 0.20           | 2.0            | 10.0           | 20.            |
| o-Xylene                | 0.10           | 1.0            | 5.0            | 10.            |
| Methanol                | 0.01           | 0.1            | 0.5            | 1.             |
| Ethanol                 | 0.01           | 0.1            | 0.5            | 1.             |
| Higher Alcohols         | 0.01           | 0.1            | 0.5            | 1.             |
| Formaldehyde            | 0.25           | 2.5            | 12.5           | 25.            |
| Acetylene               | 0.20           | 2.0            | 10.0           | 20.            |
| Acetaldehyde            | 0.10           | 1.0            | 5.0            | 10.            |
| Higher Aldehyde         | 0.05           | 0.5            | 2.5            | 5.             |
| Acetone                 | 0.03           | 0.3            | 1.5            | 3.             |
| Methyl Ethyl Ketone     | 0.20           | 2.0            | 10.0           | 20.            |
| Higher Ketone           | 0.20           | 2.0            | 10.0           | 20.            |
| Glyoxal                 | 0.02           | 0.2            | 1.0            | 2.             |
| Methylglyoxal           | 0.01           | 0.05           | 0.25           | 0.5            |
| Methacrolein            | 0.01           | 0.1            | 0.5            | 1.0            |
| Methyl Vinyl Ketone     | 0.01           | 0.1            | 0.5            | 1.0            |
| Isoprene                | 0.34           | 3.4            | 17.0           | 34.            |
| $\alpha$ -Pinenes       | 0.10           | 1.0            | 5.0            | 10.            |
| d-Limonene              | 0.10           | 1.0            | 5.0            | 10.            |

**Table S6.** NO<sub>x</sub>/VOC ratios for cases simulated.

|                 |        | Total NMOC (ppbC) |        |         |        |
|-----------------|--------|-------------------|--------|---------|--------|
| NO <sub>x</sub> | (ppbN) | NMOC1             | NMOC2  | NMOC3   | NMOC4  |
|                 |        | 19.09             | 190.9  | 954.5   | 1909.  |
| A               | 0.5    | 38.18             | 381.80 | 1909.00 | 3818.0 |
| B               | 2.5    | 7.64              | 76.36  | 381.80  | 763.6  |
| C               | 5.0    | 3.82              | 38.18  | 190.90  | 381.8  |
| D               | 10.    | 1.91              | 19.09  | 95.45   | 190.9  |

**Table S7.** RACM1 maximum ozone mixing ratios.

|       | RACM1 O <sub>3</sub> (ppb) |        |        |        |
|-------|----------------------------|--------|--------|--------|
|       | A                          | B      | C      | D      |
| NMOC1 | 38.74                      | 34.96  | 30.00  | 30.00  |
| NMOC2 | 55.81                      | 80.45  | 56.61  | 41.48  |
| NMOC3 | 62.85                      | 110.99 | 94.43  | 71.24  |
| NMOC4 | 105.59                     | 157.19 | 153.30 | 122.59 |

**Table S8** RACM2 maximum ozone mixing ratios.

|       | RACM2 O <sub>3</sub> (ppb) |        |       |       |
|-------|----------------------------|--------|-------|-------|
|       | A                          | B      | C     | D     |
| NMOC1 | 36.33                      | 31.54  | 30.00 | 30.00 |
| NMOC2 | 57.51                      | 54.11  | 38.57 | 30.00 |
| NMOC3 | 66.58                      | 90.85  | 58.82 | 43.30 |
| NMOC4 | 105.20                     | 145.87 | 94.70 | 73.97 |

**Figure Captions**

**Figure S1.** Plot of maximum ozone mixing ratios estimated from RACM2 versus those estimated by RACM1 for the conditions given in Tables 6 – 10. The solid line is the 1-1 line of perfect agreement while the dashed line is the regression line between the two mechanisms.

**Figure S2.** Plot of maximum HNO<sub>3</sub> mixing ratios estimated from RACM2 versus those estimated by RACM1 for the conditions given in Tables 6 – 10. The solid line is the 1-1 line of perfect agreement while the dashed line is the regression line between the two mechanisms.

**Figure S3.** Plot of maximum PAN mixing ratios estimated from RACM2 versus those estimated by RACM1 for the conditions given in Tables 1 – 4. The solid line is the 1-1 line of perfect agreement while the dashed line is the regression line between the two mechanisms.

**Figure S4.** Plot of maximum H<sub>2</sub>O<sub>2</sub> mixing ratios estimated from RACM2 versus those estimated by RACM1 for the conditions given in Tables 1 – 4. The solid line is the 1-1 line of perfect agreement while the dashed line is the regression line between the two mechanisms.

**Figure S5.** Plot of maximum HCHO mixing ratios estimated from RACM2 versus those estimated by RACM1 for the conditions given in Tables 1 – 4. The solid line is the 1-1 line of perfect agreement while the dashed line is the regression line between the two mechanisms.

**Figure S6.** Plot of maximum H<sub>2</sub>SO<sub>4</sub> mixing ratios estimated from RACM2 versus those estimated by RACM1 for the conditions given in Tables 1 – 4. The solid line is the 1-1 line of perfect agreement while the dashed line is the regression line between the two mechanisms.

## References

- Aschmann, S.M.; Atkinson, R., 1998. Kinetics of the gas-phase reactions of the OH radical with selected glycol ethers, glycols, and alcohols. *International Journal of Chemical Kinetics* 30, 533–540.
- Atkinson, R., 2003. Kinetics of the gas-phase reactions of OH radicals with alkanes and cycloalkanes. *Atmospheric Chemistry and Physics* 3, 2233–2307.
- Atkinson, R., Baulch, D.L., Cox, R.A., Crowley, J.N., Hampson, R.F., Hynes, R.G., Jenkin, M.E., Rossi, M.J., Troe, J., 2006. Evaluated kinetic and photochemical data for atmospheric chemistry: volume II – gas phase reactions of organic species. *Atmospheric Chemistry and Physics* 6, 3625–4055.
- Bierbach, A., Barnes, I., Becker, K.H., Wiesen, E., 1994. Atmospheric Chemistry of Unsaturated Carbonyls - Butenedial, 4-Oxo-2-Pentenal, 3-Hexene-2,5-Dione, Maleic-Anhydride, 3h-Furan-2-One, And 5-Methyl-3h-Furan-2-One. *Environmental Science & Technology* 28, 715–729.
- Bridier, I., Veyret, B., Lesclaux, R., Jenkin, M.E., 1993. Flash photolysis study of the UV spectrum and kinetics of reactions of the acetonylperoxy radical. *Journal of the Chemical Society, Faraday Transactions* 89, 2993–2997.
- Carr, S., Heard, D.E., Blitz, M.A., 2009. Comment on atmospheric hydroxyl radical production from electronically excited NO<sub>2</sub> and H<sub>2</sub>O. *Science* 324, 336b.
- Carter W.P.L, 1996. Condensed atmospheric photooxidation mechanisms for isoprene. *Atmospheric Environment* 30, 4275–4290.
- Carter, W.P.L., Atkinson, R., 1996. Development and Evaluation of a Detailed Mechanism for the Atmospheric Reactions of Isoprene and NO<sub>x</sub>. *International Journal of Chemical Kinetics* 28, 497–530.
- El Boudali, A.; Le Calve, S.; Le Bras, G.; Mellouki, A. 1996. Kinetic studies of OH reactions with a series of acetates. *Journal of Physical Chemistry* 100, 12364–12368.
- Ferri, D., Astorga, C., Tedeschi, R., Winterhalter, R., Viidanoja, J., Bolzacchin, i E., Jensen, N.R., Larsen, B.R., Hjorth, J., 2001. Photo-oxidation of benzene, toluene and benzaldehyde: identification and

quantification of reaction products in the gas-phase and in particles, In: Eighth European Symposium on the Physico-Chemical Behaviour of Atmospheric Pollutants, Torino, Italia, 17–20 September 2001.

Galloway, M. M., Huisman, A. J., Yee, L. D., Chan, A. W. H., Loza, C. L., Seinfeld, J. H., and Keutsch, F. N., 2011. Yields of oxidized volatile organic compounds during the OH radical initiated oxidation of isoprene, methyl vinyl ketone, and methacrolein under high NO<sub>x</sub> conditions. *Atmospheric Chemistry and Physics* 11, 10779–10790.

Gierczak T., Gilles, M.K., Bauerle, S., Ravishankara, A.R., 2003. Reaction of Hydroxyl Radical with Acetone. 1. Kinetics of the Reactions of OH, OD, and <sup>18</sup>OH with Acetone and Acetone-d<sub>6</sub>. *Journal of Physical Chemistry A* 107, 5014–5020.

Li, S., Matthews J., Sinha, A., 2008. Atmospheric hydroxyl radical production from electronically excited NO<sub>2</sub> and H<sub>2</sub>O. *Science* 319, 1657–1660.

Lightfoot, P.D, Cox, R.A., Crowley, J.N., Destriau M., Hayman, G.D., Jenkin, M.E., Moortgat, G.K., Zabel, F., 1992. Organic peroxy radicals: Kinetics, spectroscopy and tropospheric chemistry. *Atmospheric Environment* 26, 1805–1961.

Orlando, J.J. Tyndall, G.S., Bertman, S.B., Chen, W., Burkholder, J.B., 2002. Rate coefficient for the reaction of OH with CH<sub>2</sub>=C(CH<sub>3</sub>)C(O)OONO<sub>2</sub> (MPAN). *Atmospheric Environment* 36, 1895–1900.

Orlando, J.J., Tyndall, G.S., Fracheboud, J.-M., Estupiñan, E.G., Haberkorn, S., Zimmer A., 1999. The rate and mechanism of the gas-phase oxidation of hydroxyacetone. *Atmospheric Environment* 33, 1621–1629.

Picquet, B.; Heroux, S.; Chebbi, A.; Doussin, J-F.; Durand-Jolibois, R.; Monod, A.; Loirat, H.; Carlier, P., 1998. Kinetics of the reactions of OH radicals with some oxygenated volatile organic compounds under simulated atmospheric conditions. *International Journal of Chemical Kinetics* 30, 839–847.

Roberts, J.M., Bertman, S.B., 1992. The thermal decomposition of peroxyacetic nitric anhydride (PAN) and peroxyacrylic nitric anhydride (MPAN). *International Journal of Chemical Kinetics* 24, 297–307.

Semadeni, M., Stocker, D.W., Kerr, J.A., 1995. The temperature dependence of the OH radical reactions with some aromatic compounds under simulated tropospheric conditions. *International Journal of Chemical Kinetics* 27, 287–304.

- Sivakumaran V., Crowley, J.N., 2003. Reaction between OH and CH<sub>3</sub>CHO Part 2. Temperature dependent rate coefficients (201–348 K). *Physical Chemistry Chemical Physics* 5, 106–111.
- Talukdar, R.K.; Melouki, A.; Gierczak, T.; Barone, S.; Chiang, S-Y.; Ravishankara, A.R. 1994. Kinetics of the reactions of OH with alkanes. *International Journal of Chemical Kinetics* 26, 973–990.
- Tyndall, G.S., Cox, R.A., Granier, C., Lesclaux, R., Moortgat, G.K., Pilling, M.J., Ravishankara, A.R., Wallington, T.J., 2001. Atmospheric chemistry of small organic peroxy radicals. *Journal Of Geophysical Research-Atmospheres* 106, 12157–12182.
- Tyndall, G.S., Staffelbach, T.A., Orlando, J.J., Calvert, J.G., 1995. Rate coefficients for the reactions of OH radicals with Methylglyoxal and Acetaldehyde. *International Journal of Chemical Kinetics* 27, 1009–1020.
- Uselman, W.M., Levine, S.Z., Chan, W.H., Calvert, J.G., Shaw, J.H., 1979. A kinetic study of the mechanism of peroxyxynitric acid formation in irradiated mixtures of chlorine, hydrogen, nitrogen dioxide and nitric oxide in air, in *Nitrogenous Air Pollutants, Chemical and Biological Implications*, edited by D. Grosjean, Ann Arbor Sci., Ann Arbor Mich., 1979.
- Veillerot, M.; Foster, P.; Guillermo, R.; Galloo, I.C., 1996. Gas-phase reaction of n-butyl acetate with the hydroxyl radical under simulated tropospheric conditions: relative rate constant and product study. *International Journal of Chemical Kinetics* 28, 235–243.
- Wallington T.J., Kurylo M.J., 1987. Flash photolysis resonance fluorescence investigation of the gas-phase reactions of OH radicals with a series of aliphatic ketones over the temperature range 240–440 K. *Journal of Physical Chemistry* 91, 5050–5054.
- Wayne, R.P., 2000. *Chemistry of Atmospheres: An Introduction to the Chemistry of the Atmospheres of Earth, the Planets, and Their Satellites*. Oxford University Press, Oxford.
- Wilson, E.W., Jr., Hamilton, W.A., Kennington, H.R., Evans B., III, Scott N.W. 2006. Measurement and Estimation of Rate Constants for the Reactions of Hydroxyl Radical with Several Alkanes and Cycloalkanes. *Journal of Physical Chemistry A* 110, 3593–3604.
